# Supplementary material for: The birth of a bacterial tRNA gene by large-scale, tandem duplication events
Source: eLife. 2020 Oct 30;9:e57947. doi: 10.7554/eLife.57947 (PMC7661048; doi:10.7554/eLife.57947)
Supplement: Figure 2—source data 1. — Raw absorbance reads are provided for each sample, as well as plots of absorbance over time for each genotype, calculations of maximum growth rate and lag time, and details of statistical tests used to detect differences in growth profiles between genotypes. [file elife-57947-fig2-data1.xlsx]

## Sheet: rawdata
Source data for Figure 2B, 2C, 2F, 2G
This tab contains the raw absorbance reads for the growth curves and Vmax measurements
								Medium	Strain	#reps		Method
Software Version	3.03.14							M9	SBW25	7		96 well plate sealed with a plastic lid secured with tape on the 2x short sides.Plate contained 198 ul medium with 2 ul pre-culture (grown in 96-well plate in corresponding medium. Each pre-culture plate was founded by a single colony, grown on KB or M9 agar as appropriate.)
									delserCGA-1	7
Experiment File Path:	E:\20190327_sercga_del_m9kb_jg.xpt								SBW25-eWT	7
Protocol File Path:	C:\Users\Public\Documents\Protocols\gallie_Pf_72h.prt								M9 medium control	7
Plate Number	Plate 1							KB	SBW25	7
Date	2019-03-27								delserCGA-1	6	*One replicate, well G9 was removed (see datasheet for delserCGA-1)
Time	08:24:37								SBW25-eWT	7
Reader Type:	Epoch 2								KB medium control	7
Reader Serial Number:	1711135							Unused wells	due to known precipitation issues at the edges of the plate; filled with 200 ul KB or M9	41
Reading Type	Reader									96
Procedure Details
Plate Type	96 WELL PLATE
Eject plate on completion
Set Temperature	Setpoint 26°C, Gradient 2 °C
	Preheat before moving to next step
Start Kinetic	Runtime 25:00:00 (HH:MM:SS), Interval 0:05:00, 301 Reads
Shake	Orbital: 0:05 (MM:SS)
	Frequency: 282 cpm (3 mm)
Read	Absorbance Endpoint
	Full Plate
	Wavelengths: 600
	Read Speed: Normal, Delay: 100 msec, Measurements/Data Point: 8
End Kinetic
600
	Time	T° 600	A1	A2	A3	A4	A5	A6	A7	A8	A9	A10	A11	A12	B1	B2	B3	B4	B5	B6	B7	B8	B9	B10	B11	B12	C1	C2	C3	C4	C5	C6	C7	C8	C9	C10	C11	C12	D1	D2	D3	D4	D5	D6	D7	D8	D9	D10	D11
	00:00:09	27.1	0.117	0.132	0.122	0.121	0.117	0.113	0.123	0.121	0.124	0.123	0.12	0.121	0.118	0.117	0.114	0.115	0.104	0.109	0.14	0.136	0.135	0.554	0.157	0.119	0.126	0.106	0.101	0.117	0.104	0.114	0.239	0.112	0.38	0.116	0.124	0.121	0.128	0.11	0.11	0.107	0.108	0.111	0.225	0.148	0.125	0.286	0.26
	00:05:09	27.2	0.115	0.16	0.121	0.121	0.116	0.112	0.123	0.121	0.124	0.123	0.12	0.12	0.117	0.113	0.113	0.115	0.105	0.11	0.139	0.155	0.137	0.536	0.154	0.118	0.125	0.106	0.101	0.117	0.104	0.114	0.209	0.112	0.349	0.116	0.126	0.121	0.127	0.109	0.109	0.108	0.109	0.111	0.22	0.151	0.127	0.271	0.233
	00:10:09	27.2	0.115	0.161	0.121	0.12	0.116	0.113	0.122	0.121	0.124	0.122	0.12	0.12	0.117	0.113	0.113	0.115	0.107	0.11	0.141	0.153	0.137	0.525	0.154	0.118	0.125	0.106	0.101	0.117	0.104	0.113	0.197	0.112	0.334	0.116	0.128	0.121	0.127	0.11	0.116	0.109	0.11	0.112	0.217	0.154	0.131	0.263	0.224
	00:15:09	27.3	0.114	0.161	0.121	0.12	0.115	0.112	0.122	0.121	0.123	0.122	0.12	0.12	0.117	0.113	0.112	0.115	0.106	0.109	0.144	0.154	0.136	0.522	0.152	0.118	0.124	0.105	0.101	0.118	0.104	0.113	0.192	0.112	0.325	0.116	0.128	0.121	0.126	0.11	0.111	0.109	0.11	0.112	0.218	0.153	0.136	0.257	0.221
	00:20:09	27.3	0.114	0.162	0.121	0.12	0.115	0.112	0.122	0.121	0.123	0.122	0.12	0.12	0.116	0.112	0.112	0.115	0.105	0.109	0.145	0.16	0.136	0.518	0.153	0.118	0.124	0.105	0.101	0.118	0.104	0.113	0.189	0.112	0.32	0.116	0.128	0.121	0.126	0.11	0.111	0.11	0.109	0.111	0.218	0.152	0.142	0.252	0.221
	00:25:09	27.3	0.114	0.163	0.121	0.12	0.115	0.112	0.122	0.121	0.123	0.122	0.12	0.12	0.116	0.112	0.112	0.115	0.105	0.109	0.145	0.169	0.136	0.517	0.154	0.118	0.124	0.106	0.101	0.118	0.104	0.114	0.189	0.112	0.318	0.116	0.128	0.121	0.126	0.109	0.111	0.109	0.11	0.111	0.217	0.151	0.146	0.248	0.22
	00:30:09	27.3	0.114	0.163	0.121	0.12	0.115	0.112	0.122	0.121	0.123	0.122	0.12	0.12	0.116	0.112	0.112	0.115	0.106	0.108	0.146	0.175	0.136	0.517	0.153	0.118	0.124	0.105	0.101	0.117	0.104	0.113	0.19	0.112	0.317	0.116	0.128	0.121	0.126	0.11	0.113	0.108	0.11	0.111	0.217	0.152	0.149	0.246	0.22
	00:35:09	27.4	0.114	0.163	0.121	0.12	0.115	0.112	0.122	0.121	0.123	0.122	0.12	0.12	0.116	0.112	0.113	0.115	0.106	0.109	0.146	0.177	0.136	0.513	0.153	0.118	0.124	0.105	0.1	0.117	0.103	0.112	0.194	0.112	0.317	0.115	0.128	0.12	0.126	0.11	0.115	0.109	0.11	0.112	0.218	0.151	0.151	0.244	0.219
	00:40:09	27.4	0.114	0.163	0.12	0.12	0.115	0.112	0.122	0.121	0.123	0.122	0.12	0.121	0.116	0.112	0.112	0.115	0.105	0.108	0.146	0.181	0.136	0.509	0.154	0.118	0.124	0.106	0.101	0.117	0.104	0.114	0.195	0.112	0.317	0.116	0.128	0.121	0.126	0.111	0.111	0.109	0.11	0.111	0.22	0.15	0.153	0.242	0.219
	00:45:09	27.4	0.114	0.163	0.12	0.12	0.115	0.112	0.122	0.121	0.123	0.122	0.12	0.123	0.116	0.113	0.112	0.115	0.107	0.11	0.147	0.185	0.136	0.505	0.154	0.119	0.123	0.109	0.1	0.116	0.104	0.113	0.203	0.112	0.316	0.115	0.128	0.121	0.126	0.111	0.111	0.109	0.11	0.111	0.223	0.15	0.154	0.24	0.22
	00:50:09	27.5	0.114	0.163	0.12	0.12	0.115	0.112	0.122	0.121	0.123	0.122	0.121	0.125	0.116	0.114	0.113	0.115	0.105	0.109	0.147	0.187	0.136	0.504	0.154	0.121	0.123	0.105	0.101	0.116	0.104	0.115	0.204	0.112	0.315	0.115	0.128	0.121	0.126	0.11	0.111	0.109	0.11	0.111	0.228	0.153	0.156	0.24	0.22
	00:55:09	27.5	0.114	0.163	0.12	0.12	0.115	0.113	0.122	0.121	0.123	0.123	0.122	0.127	0.116	0.114	0.113	0.115	0.107	0.11	0.148	0.189	0.136	0.502	0.155	0.122	0.123	0.105	0.101	0.116	0.104	0.115	0.209	0.112	0.314	0.115	0.128	0.122	0.126	0.11	0.112	0.109	0.11	0.111	0.231	0.158	0.157	0.239	0.221
	01:00:09	27.5	0.114	0.163	0.12	0.119	0.115	0.113	0.122	0.121	0.124	0.124	0.124	0.128	0.116	0.114	0.113	0.115	0.106	0.11	0.148	0.188	0.136	0.498	0.156	0.124	0.123	0.105	0.1	0.115	0.104	0.112	0.197	0.112	0.314	0.115	0.128	0.123	0.125	0.111	0.111	0.109	0.11	0.111	0.23	0.162	0.158	0.24	0.224
	01:05:09	27.5	0.114	0.163	0.12	0.12	0.115	0.114	0.123	0.122	0.125	0.126	0.125	0.13	0.116	0.114	0.113	0.115	0.106	0.11	0.148	0.186	0.138	0.492	0.157	0.125	0.123	0.105	0.1	0.116	0.104	0.114	0.197	0.112	0.314	0.116	0.129	0.124	0.126	0.111	0.113	0.11	0.111	0.111	0.23	0.158	0.16	0.241	0.227
	01:10:09	27.5	0.114	0.163	0.121	0.12	0.116	0.115	0.124	0.123	0.126	0.127	0.127	0.132	0.116	0.114	0.113	0.115	0.108	0.111	0.149	0.185	0.139	0.488	0.158	0.127	0.123	0.106	0.1	0.115	0.106	0.114	0.199	0.113	0.315	0.116	0.13	0.126	0.126	0.112	0.114	0.111	0.113	0.113	0.23	0.16	0.163	0.245	0.231
	01:15:09	27.5	0.114	0.163	0.122	0.121	0.117	0.116	0.126	0.124	0.128	0.129	0.128	0.134	0.116	0.114	0.113	0.116	0.11	0.112	0.15	0.189	0.141	0.484	0.16	0.129	0.123	0.106	0.101	0.116	0.107	0.116	0.202	0.114	0.316	0.117	0.132	0.127	0.127	0.115	0.116	0.116	0.115	0.115	0.23	0.163	0.168	0.248	0.23
	01:20:09	27.5	0.114	0.163	0.123	0.122	0.118	0.117	0.127	0.125	0.129	0.13	0.13	0.136	0.116	0.114	0.113	0.117	0.112	0.114	0.153	0.194	0.142	0.479	0.163	0.131	0.124	0.106	0.101	0.118	0.109	0.12	0.205	0.115	0.316	0.118	0.133	0.129	0.128	0.116	0.117	0.115	0.117	0.117	0.232	0.167	0.176	0.251	0.231
	01:25:09	27.5	0.114	0.163	0.123	0.123	0.119	0.119	0.128	0.126	0.13	0.132	0.131	0.138	0.116	0.114	0.113	0.119	0.115	0.117	0.157	0.203	0.143	0.472	0.167	0.132	0.124	0.107	0.102	0.12	0.112	0.121	0.208	0.117	0.317	0.12	0.134	0.13	0.129	0.118	0.119	0.118	0.119	0.12	0.235	0.167	0.186	0.254	0.232
	01:30:09	27.5	0.114	0.163	0.124	0.123	0.12	0.12	0.129	0.127	0.131	0.133	0.133	0.139	0.116	0.113	0.113	0.121	0.118	0.118	0.161	0.21	0.145	0.466	0.172	0.134	0.125	0.107	0.104	0.121	0.115	0.124	0.211	0.118	0.318	0.121	0.136	0.132	0.129	0.121	0.123	0.124	0.121	0.123	0.239	0.167	0.197	0.257	0.234
	01:35:09	27.5	0.114	0.163	0.126	0.124	0.121	0.121	0.13	0.128	0.133	0.134	0.134	0.141	0.116	0.114	0.113	0.124	0.12	0.122	0.167	0.216	0.146	0.46	0.179	0.136	0.126	0.108	0.106	0.124	0.116	0.127	0.215	0.119	0.319	0.122	0.137	0.133	0.13	0.123	0.125	0.123	0.124	0.125	0.242	0.169	0.209	0.26	0.235
	01:40:09	27.5	0.114	0.163	0.127	0.125	0.123	0.122	0.132	0.129	0.134	0.135	0.136	0.143	0.117	0.114	0.114	0.126	0.122	0.124	0.174	0.222	0.148	0.453	0.182	0.137	0.127	0.11	0.108	0.126	0.119	0.128	0.219	0.12	0.319	0.123	0.139	0.135	0.131	0.125	0.129	0.126	0.126	0.127	0.245	0.173	0.217	0.261	0.236
	01:45:09	27.5	0.114	0.163	0.128	0.126	0.124	0.123	0.133	0.13	0.135	0.137	0.138	0.145	0.117	0.114	0.114	0.128	0.125	0.126	0.179	0.226	0.15	0.446	0.183	0.139	0.128	0.112	0.11	0.128	0.122	0.131	0.221	0.121	0.321	0.125	0.14	0.136	0.132	0.127	0.13	0.128	0.128	0.13	0.248	0.176	0.223	0.262	0.239
	01:50:09	27.5	0.114	0.163	0.128	0.127	0.124	0.124	0.134	0.131	0.136	0.138	0.139	0.147	0.118	0.114	0.114	0.13	0.126	0.127	0.18	0.23	0.152	0.438	0.184	0.141	0.129	0.116	0.112	0.13	0.124	0.133	0.225	0.123	0.321	0.126	0.142	0.138	0.133	0.128	0.131	0.13	0.131	0.132	0.252	0.177	0.231	0.262	0.242
	01:55:09	27.5	0.114	0.163	0.129	0.127	0.125	0.126	0.136	0.132	0.137	0.139	0.14	0.149	0.118	0.114	0.114	0.131	0.128	0.129	0.18	0.238	0.154	0.43	0.187	0.143	0.129	0.117	0.115	0.132	0.125	0.135	0.228	0.124	0.323	0.128	0.144	0.139	0.134	0.13	0.133	0.132	0.133	0.135	0.255	0.179	0.239	0.264	0.245
	02:00:09	27.5	0.114	0.163	0.13	0.128	0.126	0.127	0.137	0.134	0.139	0.141	0.142	0.151	0.119	0.114	0.115	0.133	0.129	0.13	0.182	0.233	0.157	0.423	0.19	0.145	0.13	0.122	0.116	0.134	0.127	0.137	0.231	0.125	0.324	0.129	0.145	0.141	0.135	0.132	0.135	0.134	0.135	0.136	0.258	0.181	0.245	0.265	0.248
	02:05:09	27.5	0.114	0.163	0.131	0.129	0.127	0.128	0.138	0.135	0.14	0.142	0.143	0.153	0.12	0.114	0.116	0.134	0.131	0.131	0.186	0.238	0.159	0.416	0.193	0.146	0.131	0.12	0.117	0.135	0.128	0.138	0.233	0.126	0.326	0.13	0.147	0.143	0.136	0.133	0.137	0.134	0.137	0.137	0.263	0.183	0.25	0.268	0.252
	02:10:09	27.5	0.114	0.163	0.132	0.13	0.128	0.129	0.139	0.136	0.141	0.144	0.145	0.154	0.121	0.114	0.117	0.135	0.132	0.132	0.189	0.24	0.162	0.409	0.195	0.148	0.132	0.122	0.118	0.137	0.129	0.139	0.236	0.128	0.328	0.132	0.149	0.144	0.137	0.135	0.139	0.135	0.138	0.138	0.266	0.186	0.255	0.27	0.256
	02:15:09	27.5	0.114	0.163	0.133	0.131	0.129	0.131	0.14	0.137	0.143	0.145	0.146	0.156	0.121	0.114	0.118	0.136	0.133	0.134	0.196	0.245	0.165	0.403	0.197	0.15	0.133	0.123	0.12	0.138	0.13	0.139	0.238	0.129	0.329	0.133	0.15	0.146	0.138	0.136	0.14	0.139	0.14	0.139	0.271	0.189	0.26	0.273	0.26
	02:20:09	27.5	0.114	0.163	0.133	0.131	0.13	0.132	0.141	0.138	0.144	0.146	0.148	0.158	0.122	0.114	0.119	0.137	0.134	0.134	0.202	0.25	0.167	0.398	0.199	0.15	0.134	0.123	0.121	0.139	0.132	0.141	0.24	0.13	0.33	0.134	0.152	0.147	0.139	0.137	0.141	0.138	0.141	0.14	0.276	0.191	0.264	0.275	0.263
	02:25:09	27.5	0.113	0.163	0.134	0.132	0.13	0.133	0.142	0.139	0.145	0.147	0.149	0.16	0.123	0.115	0.12	0.138	0.137	0.135	0.208	0.254	0.171	0.393	0.202	0.152	0.134	0.125	0.122	0.139	0.132	0.141	0.243	0.131	0.331	0.135	0.153	0.148	0.14	0.137	0.141	0.139	0.142	0.141	0.281	0.195	0.268	0.277	0.266
	02:30:09	27.5	0.113	0.163	0.135	0.133	0.131	0.134	0.143	0.14	0.147	0.148	0.151	0.162	0.123	0.115	0.121	0.138	0.137	0.135	0.212	0.259	0.174	0.388	0.203	0.154	0.135	0.126	0.123	0.14	0.134	0.144	0.244	0.132	0.332	0.136	0.155	0.15	0.141	0.138	0.143	0.14	0.143	0.141	0.285	0.198	0.275	0.279	0.269
	02:35:09	27.5	0.114	0.163	0.136	0.134	0.132	0.134	0.144	0.141	0.148	0.149	0.152	0.163	0.124	0.115	0.123	0.139	0.138	0.137	0.217	0.265	0.179	0.385	0.206	0.156	0.136	0.126	0.124	0.141	0.136	0.142	0.248	0.133	0.333	0.138	0.157	0.152	0.142	0.139	0.143	0.14	0.144	0.142	0.292	0.202	0.282	0.282	0.271
	02:40:09	27.5	0.114	0.163	0.137	0.135	0.133	0.135	0.145	0.141	0.149	0.151	0.153	0.165	0.125	0.116	0.124	0.139	0.138	0.138	0.223	0.272	0.184	0.383	0.209	0.158	0.137	0.127	0.124	0.141	0.136	0.142	0.251	0.134	0.334	0.139	0.158	0.153	0.143	0.14	0.144	0.141	0.145	0.143	0.297	0.206	0.287	0.285	0.274
	02:45:09	27.5	0.113	0.163	0.137	0.136	0.134	0.136	0.146	0.143	0.15	0.152	0.155	0.167	0.125	0.117	0.125	0.139	0.139	0.138	0.227	0.278	0.187	0.38	0.212	0.16	0.138	0.126	0.125	0.141	0.136	0.145	0.253	0.135	0.335	0.14	0.16	0.154	0.144	0.14	0.143	0.146	0.146	0.144	0.302	0.209	0.292	0.288	0.277
	02:50:09	27.5	0.113	0.163	0.138	0.137	0.135	0.138	0.147	0.144	0.151	0.153	0.156	0.169	0.126	0.117	0.126	0.138	0.139	0.14	0.231	0.283	0.189	0.378	0.215	0.161	0.139	0.127	0.125	0.142	0.137	0.144	0.257	0.136	0.336	0.141	0.161	0.156	0.145	0.14	0.145	0.143	0.146	0.144	0.308	0.214	0.296	0.29	0.28
	02:55:09	27.5	0.114	0.163	0.139	0.138	0.136	0.139	0.148	0.145	0.153	0.154	0.157	0.171	0.127	0.118	0.127	0.139	0.139	0.139	0.236	0.29	0.191	0.377	0.22	0.163	0.14	0.128	0.125	0.142	0.137	0.145	0.261	0.137	0.338	0.143	0.163	0.157	0.145	0.14	0.144	0.146	0.146	0.144	0.315	0.22	0.301	0.294	0.283
	03:00:09	27.5	0.113	0.163	0.14	0.139	0.137	0.14	0.149	0.145	0.154	0.155	0.158	0.172	0.127	0.118	0.129	0.14	0.138	0.139	0.241	0.296	0.192	0.375	0.224	0.165	0.141	0.127	0.125	0.143	0.137	0.149	0.263	0.138	0.339	0.144	0.165	0.159	0.146	0.14	0.145	0.148	0.146	0.144	0.32	0.224	0.305	0.297	0.288
	03:05:09	27.5	0.113	0.163	0.141	0.14	0.138	0.141	0.151	0.147	0.154	0.155	0.159	0.174	0.128	0.119	0.13	0.14	0.139	0.139	0.246	0.302	0.195	0.374	0.23	0.166	0.142	0.128	0.126	0.142	0.136	0.145	0.268	0.139	0.34	0.145	0.167	0.16	0.147	0.141	0.144	0.143	0.147	0.144	0.327	0.23	0.31	0.302	0.292
	03:10:09	27.5	0.113	0.163	0.142	0.141	0.139	0.142	0.152	0.148	0.155	0.156	0.161	0.175	0.129	0.12	0.131	0.14	0.139	0.141	0.251	0.308	0.197	0.374	0.233	0.168	0.143	0.129	0.126	0.142	0.136	0.147	0.27	0.141	0.341	0.147	0.169	0.162	0.148	0.14	0.148	0.145	0.148	0.144	0.333	0.234	0.314	0.306	0.296
	03:15:09	27.5	0.113	0.163	0.143	0.142	0.14	0.143	0.153	0.149	0.157	0.158	0.162	0.177	0.13	0.121	0.132	0.141	0.14	0.142	0.257	0.314	0.2	0.374	0.237	0.169	0.144	0.129	0.126	0.142	0.137	0.145	0.275	0.142	0.342	0.148	0.171	0.163	0.149	0.14	0.144	0.146	0.149	0.142	0.339	0.241	0.319	0.31	0.302
	03:20:09	27.6	0.113	0.163	0.144	0.143	0.141	0.144	0.154	0.15	0.158	0.159	0.162	0.179	0.13	0.122	0.133	0.141	0.14	0.142	0.262	0.319	0.201	0.373	0.241	0.171	0.145	0.13	0.126	0.142	0.136	0.146	0.279	0.143	0.343	0.149	0.173	0.165	0.15	0.14	0.148	0.142	0.149	0.142	0.344	0.245	0.323	0.314	0.306
	03:25:09	27.6	0.113	0.163	0.145	0.144	0.142	0.145	0.156	0.151	0.159	0.16	0.162	0.18	0.131	0.122	0.134	0.142	0.139	0.14	0.27	0.329	0.203	0.377	0.247	0.173	0.145	0.131	0.127	0.142	0.135	0.145	0.284	0.144	0.344	0.15	0.175	0.166	0.15	0.139	0.146	0.145	0.148	0.141	0.351	0.255	0.329	0.32	0.314
	03:30:09	27.6	0.113	0.163	0.146	0.145	0.143	0.144	0.157	0.152	0.16	0.161	0.164	0.182	0.132	0.123	0.135	0.142	0.14	0.139	0.274	0.352	0.206	0.376	0.252	0.175	0.147	0.131	0.126	0.142	0.133	0.145	0.286	0.145	0.346	0.152	0.177	0.168	0.151	0.14	0.145	0.147	0.148	0.141	0.357	0.258	0.332	0.324	0.317
	03:35:09	27.6	0.113	0.163	0.147	0.146	0.144	0.145	0.158	0.153	0.161	0.162	0.164	0.184	0.133	0.124	0.136	0.141	0.139	0.14	0.281	0.339	0.207	0.38	0.259	0.176	0.147	0.133	0.127	0.142	0.132	0.145	0.29	0.146	0.347	0.153	0.178	0.169	0.152	0.14	0.145	0.146	0.146	0.141	0.361	0.266	0.34	0.331	0.325
	03:40:09	27.6	0.113	0.163	0.148	0.147	0.145	0.146	0.159	0.154	0.163	0.163	0.166	0.186	0.134	0.125	0.137	0.141	0.139	0.139	0.285	0.358	0.21	0.382	0.266	0.177	0.148	0.131	0.127	0.143	0.132	0.146	0.294	0.148	0.348	0.155	0.18	0.171	0.153	0.141	0.146	0.144	0.146	0.142	0.371	0.271	0.343	0.335	0.328
	03:45:09	27.6	0.113	0.163	0.148	0.148	0.146	0.147	0.159	0.155	0.164	0.164	0.167	0.187	0.134	0.126	0.138	0.141	0.138	0.139	0.294	0.358	0.214	0.387	0.272	0.179	0.149	0.13	0.127	0.143	0.131	0.144	0.298	0.149	0.349	0.156	0.182	0.172	0.154	0.14	0.145	0.147	0.146	0.141	0.376	0.277	0.35	0.343	0.335
	03:50:09	27.6	0.113	0.163	0.149	0.149	0.147	0.148	0.16	0.156	0.164	0.165	0.169	0.189	0.135	0.127	0.138	0.141	0.138	0.138	0.298	0.368	0.218	0.39	0.279	0.18	0.15	0.131	0.127	0.142	0.13	0.144	0.302	0.15	0.351	0.157	0.184	0.174	0.154	0.14	0.147	0.147	0.147	0.142	0.381	0.283	0.354	0.345	0.341
	03:55:09	27.6	0.113	0.163	0.15	0.15	0.148	0.149	0.162	0.157	0.165	0.166	0.17	0.19	0.136	0.129	0.138	0.142	0.139	0.138	0.306	0.379	0.221	0.39	0.285	0.182	0.151	0.131	0.127	0.143	0.131	0.144	0.305	0.152	0.352	0.158	0.186	0.176	0.155	0.141	0.145	0.144	0.147	0.144	0.386	0.287	0.359	0.35	0.346
	04:00:09	27.6	0.113	0.163	0.151	0.151	0.148	0.15	0.163	0.158	0.166	0.167	0.172	0.189	0.137	0.13	0.14	0.143	0.139	0.137	0.311	0.388	0.225	0.395	0.291	0.184	0.152	0.131	0.126	0.143	0.131	0.146	0.318	0.153	0.353	0.16	0.188	0.177	0.155	0.141	0.145	0.149	0.148	0.141	0.39	0.292	0.363	0.357	0.35
	04:05:09	27.6	0.113	0.163	0.152	0.152	0.15	0.152	0.164	0.159	0.167	0.167	0.173	0.191	0.138	0.131	0.14	0.143	0.14	0.137	0.321	0.396	0.229	0.395	0.298	0.186	0.153	0.132	0.127	0.144	0.131	0.145	0.324	0.154	0.354	0.161	0.191	0.179	0.157	0.142	0.146	0.147	0.148	0.14	0.396	0.297	0.368	0.36	0.355
	04:10:09	27.6	0.113	0.163	0.153	0.153	0.15	0.153	0.165	0.16	0.168	0.168	0.175	0.192	0.138	0.132	0.141	0.143	0.14	0.14	0.326	0.403	0.233	0.397	0.302	0.187	0.154	0.133	0.126	0.143	0.131	0.145	0.327	0.155	0.355	0.162	0.194	0.18	0.158	0.142	0.147	0.15	0.147	0.141	0.402	0.301	0.372	0.362	0.36
	04:15:09	27.6	0.113	0.163	0.154	0.154	0.15	0.153	0.167	0.162	0.17	0.169	0.176	0.194	0.139	0.133	0.142	0.144	0.142	0.138	0.334	0.406	0.239	0.399	0.307	0.189	0.155	0.133	0.124	0.142	0.131	0.145	0.331	0.155	0.356	0.163	0.196	0.182	0.158	0.142	0.15	0.145	0.147	0.141	0.409	0.306	0.378	0.366	0.365
	04:20:09	27.6	0.113	0.163	0.155	0.155	0.151	0.155	0.167	0.162	0.171	0.17	0.177	0.195	0.14	0.134	0.142	0.143	0.141	0.137	0.338	0.415	0.242	0.397	0.311	0.19	0.156	0.134	0.125	0.144	0.131	0.145	0.334	0.157	0.357	0.164	0.199	0.182	0.159	0.143	0.154	0.151	0.147	0.141	0.419	0.311	0.383	0.369	0.37
	04:25:09	27.6	0.113	0.163	0.156	0.156	0.152	0.155	0.168	0.162	0.172	0.171	0.179	0.197	0.141	0.135	0.143	0.144	0.141	0.137	0.346	0.423	0.248	0.4	0.315	0.191	0.156	0.135	0.125	0.143	0.13	0.145	0.338	0.158	0.358	0.164	0.202	0.183	0.16	0.143	0.152	0.15	0.147	0.141	0.426	0.316	0.393	0.374	0.377
	04:30:09	27.6	0.113	0.163	0.157	0.156	0.153	0.156	0.169	0.163	0.173	0.171	0.18	0.199	0.141	0.136	0.145	0.144	0.14	0.138	0.352	0.43	0.252	0.402	0.319	0.192	0.157	0.137	0.125	0.143	0.13	0.144	0.342	0.159	0.359	0.166	0.206	0.185	0.161	0.143	0.151	0.149	0.145	0.142	0.427	0.321	0.399	0.38	0.382
	04:35:09	27.6	0.113	0.163	0.158	0.157	0.154	0.157	0.17	0.165	0.173	0.172	0.181	0.199	0.142	0.137	0.145	0.145	0.139	0.137	0.358	0.435	0.257	0.406	0.321	0.193	0.158	0.133	0.126	0.143	0.129	0.145	0.347	0.16	0.36	0.167	0.208	0.186	0.162	0.143	0.153	0.146	0.145	0.142	0.429	0.327	0.406	0.388	0.387
	04:40:09	27.6	0.113	0.163	0.159	0.158	0.155	0.158	0.171	0.166	0.174	0.173	0.181	0.198	0.143	0.138	0.145	0.145	0.139	0.139	0.367	0.439	0.263	0.409	0.327	0.194	0.159	0.133	0.125	0.142	0.128	0.148	0.351	0.161	0.362	0.168	0.21	0.187	0.163	0.144	0.147	0.144	0.146	0.142	0.43	0.331	0.418	0.393	0.395
	04:45:09	27.6	0.113	0.162	0.16	0.159	0.156	0.157	0.172	0.167	0.175	0.174	0.183	0.2	0.144	0.139	0.147	0.145	0.139	0.137	0.369	0.443	0.267	0.42	0.332	0.193	0.16	0.133	0.125	0.143	0.128	0.144	0.354	0.163	0.363	0.169	0.212	0.188	0.164	0.144	0.148	0.152	0.146	0.142	0.434	0.335	0.421	0.398	0.401
	04:50:09	27.6	0.113	0.162	0.161	0.158	0.156	0.157	0.173	0.167	0.175	0.171	0.184	0.2	0.145	0.141	0.147	0.144	0.138	0.138	0.382	0.447	0.271	0.422	0.337	0.193	0.161	0.133	0.125	0.142	0.129	0.143	0.358	0.163	0.365	0.169	0.214	0.189	0.165	0.145	0.148	0.147	0.147	0.141	0.438	0.34	0.43	0.4	0.405
	04:55:09	27.6	0.113	0.162	0.162	0.16	0.157	0.158	0.174	0.168	0.176	0.172	0.186	0.202	0.146	0.142	0.148	0.145	0.139	0.139	0.39	0.45	0.275	0.423	0.34	0.189	0.161	0.134	0.125	0.142	0.128	0.144	0.362	0.164	0.366	0.169	0.217	0.189	0.164	0.146	0.151	0.146	0.147	0.141	0.445	0.346	0.436	0.407	0.408
	05:00:09	27.6	0.113	0.162	0.163	0.161	0.159	0.159	0.175	0.17	0.178	0.173	0.187	0.199	0.146	0.143	0.15	0.144	0.14	0.14	0.401	0.456	0.281	0.425	0.347	0.191	0.162	0.134	0.125	0.143	0.127	0.143	0.366	0.166	0.367	0.171	0.219	0.191	0.165	0.146	0.156	0.147	0.148	0.141	0.452	0.353	0.443	0.411	0.414
	05:05:09	27.6	0.113	0.162	0.164	0.161	0.16	0.16	0.176	0.17	0.179	0.172	0.189	0.199	0.147	0.145	0.151	0.144	0.141	0.138	0.404	0.466	0.286	0.429	0.356	0.193	0.164	0.135	0.124	0.143	0.128	0.144	0.369	0.167	0.368	0.172	0.22	0.192	0.166	0.148	0.152	0.15	0.149	0.141	0.46	0.362	0.446	0.413	0.418
	05:10:09	27.6	0.113	0.162	0.165	0.163	0.161	0.16	0.174	0.17	0.18	0.173	0.187	0.201	0.148	0.146	0.151	0.145	0.141	0.139	0.409	0.47	0.29	0.43	0.368	0.195	0.165	0.135	0.124	0.143	0.127	0.146	0.369	0.168	0.369	0.173	0.222	0.194	0.167	0.147	0.152	0.151	0.149	0.141	0.469	0.371	0.452	0.417	0.42
	05:15:09	27.6	0.113	0.162	0.166	0.164	0.161	0.161	0.176	0.17	0.18	0.174	0.187	0.203	0.149	0.147	0.153	0.146	0.141	0.137	0.415	0.476	0.293	0.431	0.382	0.196	0.163	0.137	0.124	0.143	0.127	0.145	0.371	0.169	0.37	0.172	0.223	0.195	0.168	0.149	0.151	0.144	0.149	0.141	0.486	0.38	0.456	0.42	0.427
	05:20:09	27.6	0.113	0.162	0.167	0.164	0.161	0.162	0.174	0.171	0.181	0.174	0.189	0.204	0.15	0.149	0.153	0.147	0.141	0.138	0.421	0.483	0.298	0.437	0.397	0.195	0.165	0.137	0.123	0.143	0.127	0.146	0.375	0.171	0.371	0.172	0.225	0.193	0.167	0.149	0.156	0.146	0.149	0.142	0.505	0.387	0.462	0.425	0.432
	05:25:09	27.6	0.113	0.162	0.168	0.165	0.162	0.163	0.173	0.171	0.183	0.175	0.186	0.205	0.15	0.151	0.154	0.147	0.143	0.139	0.426	0.492	0.307	0.439	0.413	0.194	0.166	0.137	0.123	0.144	0.128	0.146	0.378	0.172	0.374	0.173	0.227	0.19	0.168	0.148	0.154	0.149	0.15	0.142	0.576	0.391	0.462	0.431	0.437
	05:30:09	27.6	0.113	0.162	0.169	0.167	0.161	0.164	0.172	0.172	0.183	0.175	0.186	0.198	0.152	0.152	0.155	0.146	0.142	0.14	0.43	0.505	0.313	0.443	0.423	0.194	0.167	0.138	0.123	0.143	0.126	0.146	0.381	0.173	0.373	0.174	0.228	0.192	0.17	0.149	0.158	0.145	0.15	0.142	0.629	0.407	0.467	0.438	0.445
	05:35:09	27.6	0.113	0.162	0.17	0.166	0.161	0.165	0.173	0.173	0.182	0.174	0.185	0.194	0.153	0.154	0.156	0.147	0.142	0.139	0.437	0.518	0.32	0.448	0.429	0.196	0.168	0.138	0.123	0.142	0.126	0.146	0.385	0.175	0.374	0.175	0.228	0.194	0.171	0.15	0.158	0.154	0.151	0.142	0.677	0.427	0.474	0.445	0.452
	05:40:09	27.6	0.113	0.162	0.17	0.166	0.162	0.166	0.173	0.175	0.183	0.176	0.186	0.196	0.152	0.156	0.156	0.148	0.144	0.141	0.444	0.531	0.322	0.455	0.439	0.194	0.166	0.138	0.123	0.143	0.126	0.146	0.388	0.174	0.375	0.177	0.229	0.195	0.171	0.151	0.155	0.148	0.153	0.142	0.69	0.483	0.483	0.453	0.459
	05:45:09	27.6	0.113	0.162	0.171	0.167	0.162	0.166	0.175	0.176	0.183	0.176	0.188	0.195	0.153	0.157	0.158	0.149	0.143	0.14	0.45	0.558	0.325	0.463	0.458	0.192	0.167	0.139	0.122	0.143	0.126	0.146	0.39	0.175	0.375	0.179	0.231	0.194	0.172	0.152	0.158	0.148	0.153	0.141	0.692	0.56	0.493	0.46	0.473
	05:50:09	27.6	0.113	0.162	0.172	0.166	0.164	0.167	0.176	0.175	0.183	0.176	0.188	0.197	0.154	0.159	0.158	0.15	0.144	0.14	0.459	0.606	0.329	0.473	0.543	0.193	0.168	0.14	0.122	0.143	0.126	0.146	0.391	0.175	0.376	0.18	0.233	0.194	0.173	0.154	0.161	0.147	0.154	0.141	0.698	0.599	0.498	0.468	0.482
	05:55:09	27.6	0.113	0.162	0.173	0.167	0.164	0.169	0.176	0.173	0.182	0.176	0.189	0.197	0.155	0.16	0.16	0.15	0.143	0.141	0.468	0.675	0.336	0.483	0.576	0.19	0.169	0.14	0.121	0.143	0.126	0.147	0.392	0.176	0.377	0.18	0.234	0.196	0.174	0.153	0.163	0.147	0.154	0.143	0.701	0.624	0.506	0.484	0.545
	06:00:09	27.6	0.113	0.162	0.174	0.169	0.165	0.168	0.177	0.173	0.182	0.177	0.187	0.196	0.156	0.161	0.16	0.152	0.143	0.141	0.479	0.673	0.341	0.49	0.604	0.192	0.17	0.14	0.121	0.143	0.126	0.148	0.394	0.175	0.378	0.181	0.236	0.193	0.175	0.153	0.162	0.15	0.155	0.143	0.706	0.646	0.524	0.5	0.608
	06:05:09	27.6	0.113	0.162	0.175	0.169	0.164	0.169	0.176	0.174	0.184	0.178	0.188	0.198	0.157	0.162	0.162	0.152	0.146	0.141	0.49	0.668	0.346	0.498	0.609	0.188	0.171	0.141	0.12	0.142	0.126	0.147	0.397	0.176	0.379	0.181	0.237	0.195	0.176	0.154	0.162	0.157	0.155	0.143	0.7	0.642	0.541	0.569	0.646
	06:10:09	27.6	0.113	0.162	0.176	0.168	0.164	0.17	0.178	0.176	0.185	0.176	0.188	0.2	0.158	0.162	0.164	0.151	0.146	0.144	0.51	0.677	0.354	0.504	0.613	0.184	0.172	0.141	0.12	0.143	0.124	0.147	0.399	0.176	0.38	0.181	0.238	0.191	0.175	0.154	0.166	0.151	0.156	0.143	0.699	0.648	0.613	0.651	0.652
	06:15:09	27.6	0.113	0.162	0.177	0.168	0.165	0.169	0.178	0.176	0.185	0.177	0.187	0.201	0.159	0.162	0.165	0.152	0.147	0.143	0.607	0.68	0.361	0.515	0.62	0.182	0.173	0.141	0.12	0.144	0.124	0.149	0.401	0.176	0.382	0.182	0.238	0.192	0.174	0.154	0.169	0.152	0.157	0.143	0.693	0.651	0.678	0.683	0.669
	06:20:09	27.6	0.113	0.162	0.178	0.169	0.166	0.17	0.18	0.176	0.184	0.177	0.187	0.202	0.16	0.163	0.166	0.154	0.148	0.145	0.654	0.68	0.367	0.537	0.634	0.184	0.173	0.143	0.12	0.145	0.124	0.149	0.402	0.177	0.384	0.183	0.238	0.194	0.175	0.155	0.166	0.153	0.155	0.144	0.688	0.642	0.704	0.682	0.67
	06:25:09	27.6	0.113	0.162	0.177	0.17	0.166	0.171	0.181	0.176	0.185	0.173	0.189	0.203	0.16	0.164	0.167	0.154	0.148	0.146	0.669	0.68	0.376	0.604	0.634	0.185	0.173	0.144	0.119	0.146	0.123	0.149	0.406	0.178	0.384	0.183	0.242	0.188	0.175	0.155	0.167	0.159	0.155	0.145	0.686	0.639	0.714	0.659	0.672
	06:30:08	27.6	0.113	0.162	0.178	0.171	0.168	0.172	0.182	0.174	0.187	0.174	0.19	0.195	0.161	0.165	0.167	0.154	0.149	0.146	0.679	0.677	0.384	0.657	0.624	0.187	0.172	0.144	0.119	0.146	0.122	0.15	0.405	0.179	0.384	0.184	0.243	0.187	0.175	0.156	0.169	0.154	0.157	0.145	0.686	0.639	0.716	0.675	0.671
	06:35:09	27.6	0.113	0.162	0.177	0.172	0.169	0.173	0.183	0.175	0.188	0.174	0.188	0.197	0.161	0.166	0.169	0.155	0.149	0.147	0.689	0.671	0.393	0.688	0.622	0.188	0.173	0.145	0.119	0.147	0.122	0.15	0.407	0.178	0.384	0.185	0.247	0.184	0.176	0.158	0.168	0.154	0.157	0.146	0.68	0.632	0.715	0.677	0.659
	06:40:09	27.6	0.113	0.162	0.178	0.169	0.17	0.174	0.181	0.177	0.189	0.176	0.189	0.198	0.162	0.167	0.17	0.155	0.149	0.148	0.708	0.667	0.405	0.709	0.614	0.191	0.174	0.145	0.119	0.148	0.122	0.151	0.409	0.176	0.385	0.187	0.245	0.184	0.177	0.158	0.172	0.154	0.157	0.147	0.678	0.625	0.719	0.679	0.656
	06:45:09	27.6	0.113	0.162	0.179	0.17	0.171	0.172	0.177	0.177	0.19	0.177	0.182	0.193	0.161	0.168	0.171	0.154	0.15	0.148	0.709	0.664	0.422	0.709	0.61	0.193	0.175	0.145	0.119	0.148	0.121	0.151	0.412	0.178	0.386	0.188	0.244	0.185	0.178	0.157	0.171	0.153	0.158	0.148	0.677	0.62	0.72	0.676	0.652
	06:50:09	27.6	0.113	0.162	0.179	0.169	0.172	0.173	0.178	0.179	0.19	0.178	0.183	0.193	0.162	0.168	0.172	0.156	0.149	0.15	0.72	0.662	0.456	0.706	0.605	0.194	0.175	0.145	0.119	0.148	0.122	0.15	0.412	0.178	0.388	0.189	0.243	0.186	0.179	0.156	0.17	0.153	0.157	0.15	0.675	0.616	0.715	0.67	0.646
	06:55:09	27.6	0.113	0.162	0.179	0.17	0.172	0.174	0.179	0.18	0.191	0.177	0.184	0.185	0.163	0.17	0.172	0.157	0.151	0.152	0.717	0.661	0.557	0.718	0.606	0.195	0.169	0.146	0.119	0.15	0.121	0.15	0.414	0.18	0.39	0.19	0.246	0.188	0.179	0.156	0.171	0.154	0.156	0.151	0.674	0.614	0.711	0.668	0.642
	07:00:09	27.6	0.113	0.162	0.178	0.17	0.173	0.175	0.18	0.179	0.192	0.179	0.186	0.178	0.163	0.171	0.172	0.158	0.152	0.154	0.714	0.659	0.606	0.713	0.602	0.196	0.17	0.147	0.12	0.151	0.121	0.148	0.417	0.18	0.39	0.191	0.24	0.188	0.179	0.157	0.173	0.155	0.154	0.152	0.675	0.609	0.708	0.663	0.64
	07:05:09	27.6	0.113	0.162	0.179	0.171	0.174	0.173	0.18	0.178	0.193	0.177	0.187	0.178	0.163	0.171	0.172	0.16	0.151	0.155	0.709	0.656	0.634	0.706	0.599	0.194	0.171	0.147	0.12	0.151	0.122	0.149	0.421	0.181	0.389	0.193	0.242	0.189	0.18	0.158	0.173	0.157	0.155	0.154	0.674	0.607	0.704	0.659	0.638
	07:10:09	27.6	0.113	0.162	0.179	0.17	0.175	0.172	0.181	0.179	0.194	0.177	0.188	0.177	0.164	0.174	0.173	0.159	0.152	0.155	0.709	0.657	0.646	0.708	0.599	0.193	0.171	0.147	0.12	0.151	0.122	0.149	0.424	0.183	0.39	0.194	0.245	0.19	0.18	0.158	0.174	0.156	0.156	0.155	0.675	0.605	0.703	0.658	0.636
	07:15:09	27.6	0.113	0.162	0.179	0.17	0.172	0.173	0.182	0.18	0.191	0.177	0.189	0.179	0.165	0.175	0.173	0.161	0.153	0.155	0.709	0.657	0.634	0.699	0.598	0.189	0.171	0.147	0.12	0.152	0.121	0.15	0.427	0.179	0.39	0.195	0.246	0.182	0.181	0.159	0.174	0.157	0.157	0.154	0.672	0.602	0.701	0.657	0.632
	07:20:09	27.6	0.113	0.162	0.181	0.171	0.173	0.175	0.182	0.181	0.193	0.178	0.184	0.177	0.166	0.187	0.175	0.162	0.152	0.156	0.705	0.655	0.632	0.69	0.598	0.189	0.172	0.147	0.121	0.152	0.122	0.151	0.43	0.179	0.391	0.197	0.246	0.182	0.179	0.16	0.173	0.158	0.157	0.155	0.672	0.601	0.698	0.654	0.63
	07:25:09	27.6	0.113	0.162	0.182	0.171	0.173	0.173	0.183	0.18	0.193	0.179	0.183	0.176	0.167	0.194	0.177	0.163	0.153	0.155	0.705	0.655	0.64	0.687	0.598	0.191	0.172	0.147	0.121	0.152	0.122	0.152	0.433	0.18	0.392	0.196	0.246	0.182	0.179	0.16	0.174	0.158	0.157	0.154	0.672	0.6	0.695	0.65	0.627
	07:30:09	27.6	0.113	0.162	0.183	0.172	0.172	0.174	0.184	0.181	0.194	0.18	0.184	0.177	0.167	0.209	0.177	0.164	0.155	0.155	0.705	0.653	0.629	0.684	0.599	0.191	0.173	0.149	0.12	0.152	0.123	0.154	0.435	0.182	0.395	0.196	0.249	0.182	0.18	0.162	0.176	0.158	0.158	0.154	0.672	0.599	0.692	0.646	0.625
	07:35:09	27.6	0.113	0.161	0.183	0.173	0.173	0.175	0.185	0.181	0.196	0.18	0.183	0.174	0.168	0.243	0.176	0.165	0.156	0.156	0.703	0.653	0.625	0.68	0.599	0.192	0.174	0.15	0.119	0.153	0.123	0.155	0.437	0.181	0.397	0.196	0.253	0.179	0.18	0.162	0.178	0.159	0.159	0.155	0.672	0.599	0.689	0.645	0.625
	07:40:09	27.6	0.113	0.161	0.183	0.174	0.169	0.175	0.185	0.177	0.197	0.172	0.185	0.175	0.168	0.258	0.176	0.166	0.158	0.157	0.701	0.653	0.621	0.677	0.599	0.193	0.175	0.152	0.12	0.154	0.121	0.158	0.435	0.182	0.399	0.197	0.256	0.178	0.178	0.164	0.18	0.158	0.158	0.155	0.672	0.599	0.688	0.644	0.623
	07:45:09	27.6	0.113	0.161	0.183	0.17	0.169	0.175	0.183	0.177	0.193	0.17	0.185	0.162	0.169	0.255	0.177	0.167	0.161	0.157	0.7	0.652	0.612	0.668	0.599	0.189	0.176	0.154	0.119	0.154	0.122	0.159	0.438	0.183	0.402	0.198	0.257	0.178	0.177	0.165	0.183	0.16	0.16	0.155	0.671	0.598	0.687	0.644	0.621
	07:50:09	27.6	0.113	0.161	0.184	0.171	0.17	0.175	0.184	0.178	0.194	0.171	0.185	0.162	0.17	0.283	0.177	0.167	0.164	0.158	0.702	0.653	0.612	0.668	0.601	0.19	0.176	0.156	0.118	0.155	0.122	0.162	0.436	0.184	0.406	0.197	0.259	0.179	0.178	0.17	0.186	0.161	0.162	0.156	0.673	0.599	0.688	0.647	0.621
	07:55:09	27.6	0.113	0.161	0.185	0.172	0.17	0.176	0.184	0.179	0.194	0.172	0.186	0.163	0.171	0.27	0.178	0.166	0.167	0.16	0.702	0.654	0.608	0.665	0.599	0.191	0.177	0.16	0.117	0.156	0.121	0.165	0.437	0.182	0.406	0.198	0.26	0.18	0.179	0.178	0.192	0.162	0.165	0.157	0.672	0.6	0.686	0.645	0.621
	08:00:09	27.6	0.113	0.161	0.184	0.17	0.171	0.177	0.183	0.179	0.192	0.172	0.186	0.163	0.172	0.297	0.18	0.168	0.175	0.161	0.701	0.652	0.602	0.663	0.592	0.189	0.177	0.167	0.118	0.157	0.122	0.171	0.439	0.182	0.409	0.19	0.264	0.181	0.18	0.205	0.202	0.162	0.17	0.158	0.673	0.6	0.687	0.645	0.617
	08:05:09	27.6	0.113	0.161	0.182	0.171	0.172	0.178	0.183	0.18	0.192	0.173	0.186	0.159	0.173	0.305	0.181	0.17	0.186	0.162	0.701	0.652	0.596	0.66	0.592	0.19	0.177	0.19	0.118	0.159	0.122	0.195	0.441	0.183	0.411	0.191	0.268	0.182	0.179	0.237	0.225	0.162	0.184	0.159	0.673	0.601	0.684	0.645	0.615
	08:10:09	27.6	0.113	0.161	0.183	0.171	0.173	0.179	0.184	0.181	0.192	0.174	0.187	0.16	0.172	0.295	0.182	0.172	0.224	0.163	0.702	0.652	0.597	0.66	0.593	0.191	0.179	0.216	0.118	0.16	0.122	0.247	0.442	0.183	0.411	0.192	0.272	0.184	0.179	0.257	0.234	0.163	0.195	0.16	0.674	0.601	0.683	0.646	0.617
	08:15:09	27.6	0.113	0.161	0.178	0.172	0.172	0.18	0.185	0.179	0.191	0.174	0.187	0.16	0.172	0.365	0.188	0.173	0.247	0.164	0.704	0.653	0.596	0.658	0.595	0.193	0.179	0.248	0.117	0.163	0.121	0.26	0.444	0.183	0.414	0.191	0.275	0.185	0.179	0.285	0.243	0.165	0.231	0.162	0.673	0.603	0.684	0.647	0.617
	08:20:09	27.6	0.113	0.161	0.179	0.173	0.171	0.181	0.186	0.18	0.192	0.173	0.188	0.161	0.172	0.334	0.19	0.174	0.279	0.165	0.704	0.654	0.596	0.659	0.595	0.194	0.18	0.268	0.116	0.164	0.12	0.265	0.445	0.182	0.417	0.192	0.279	0.177	0.178	0.322	0.259	0.168	0.249	0.164	0.674	0.605	0.684	0.646	0.614
	08:25:09	27.6	0.113	0.161	0.177	0.17	0.171	0.182	0.183	0.181	0.193	0.174	0.189	0.16	0.172	0.323	0.202	0.173	0.266	0.167	0.705	0.656	0.595	0.656	0.595	0.195	0.18	0.254	0.116	0.167	0.118	0.256	0.445	0.183	0.418	0.193	0.284	0.179	0.178	0.299	0.277	0.171	0.26	0.168	0.673	0.606	0.683	0.648	0.614
	08:30:09	27.6	0.113	0.161	0.178	0.171	0.172	0.182	0.183	0.182	0.189	0.172	0.19	0.16	0.173	0.363	0.227	0.173	0.273	0.173	0.701	0.653	0.591	0.655	0.592	0.196	0.18	0.279	0.116	0.173	0.117	0.279	0.445	0.184	0.419	0.187	0.289	0.175	0.179	0.318	0.296	0.179	0.256	0.179	0.669	0.605	0.68	0.647	0.614
	08:35:09	27.6	0.113	0.161	0.178	0.172	0.173	0.181	0.177	0.183	0.19	0.173	0.191	0.161	0.174	0.342	0.244	0.174	0.313	0.184	0.7	0.653	0.592	0.655	0.591	0.197	0.181	0.268	0.116	0.204	0.117	0.289	0.448	0.185	0.42	0.183	0.29	0.176	0.18	0.303	0.319	0.187	0.294	0.185	0.67	0.606	0.68	0.645	0.613
	08:40:09	27.7	0.113	0.161	0.178	0.172	0.173	0.183	0.177	0.184	0.191	0.174	0.188	0.16	0.174	0.325	0.239	0.177	0.317	0.202	0.702	0.652	0.592	0.656	0.592	0.198	0.181	0.304	0.116	0.27	0.118	0.296	0.449	0.186	0.416	0.184	0.295	0.169	0.18	0.309	0.327	0.217	0.303	0.19	0.671	0.606	0.681	0.647	0.614
	08:45:09	27.7	0.113	0.161	0.179	0.172	0.174	0.184	0.175	0.184	0.189	0.173	0.187	0.162	0.172	0.34	0.261	0.18	0.332	0.245	0.702	0.651	0.589	0.656	0.592	0.2	0.182	0.283	0.117	0.261	0.118	0.276	0.452	0.184	0.413	0.185	0.3	0.168	0.181	0.319	0.33	0.23	0.347	0.195	0.67	0.606	0.679	0.646	0.613
	08:50:09	27.7	0.113	0.161	0.179	0.173	0.174	0.184	0.174	0.185	0.19	0.174	0.188	0.163	0.172	0.332	0.249	0.18	0.323	0.252	0.702	0.652	0.588	0.654	0.593	0.201	0.183	0.295	0.116	0.295	0.117	0.304	0.455	0.185	0.414	0.181	0.301	0.169	0.179	0.327	0.34	0.238	0.323	0.258	0.667	0.607	0.678	0.644	0.613
	08:55:09	27.7	0.113	0.161	0.18	0.172	0.173	0.178	0.174	0.183	0.189	0.171	0.189	0.163	0.171	0.352	0.273	0.185	0.33	0.237	0.701	0.652	0.589	0.653	0.594	0.202	0.183	0.321	0.116	0.271	0.117	0.313	0.458	0.186	0.417	0.18	0.304	0.17	0.18	0.332	0.341	0.238	0.327	0.274	0.669	0.606	0.68	0.644	0.614
	09:00:09	27.7	0.113	0.161	0.18	0.173	0.174	0.179	0.17	0.184	0.19	0.171	0.19	0.159	0.168	0.336	0.266	0.193	0.327	0.24	0.702	0.652	0.587	0.65	0.594	0.202	0.184	0.296	0.116	0.301	0.117	0.31	0.46	0.187	0.419	0.172	0.305	0.171	0.181	0.336	0.34	0.245	0.326	0.282	0.668	0.604	0.68	0.645	0.615
	09:05:09	27.7	0.113	0.161	0.181	0.174	0.174	0.18	0.17	0.181	0.188	0.171	0.191	0.151	0.168	0.372	0.279	0.203	0.336	0.23	0.701	0.651	0.587	0.65	0.594	0.197	0.184	0.285	0.116	0.267	0.117	0.316	0.463	0.182	0.421	0.173	0.305	0.172	0.181	0.339	0.344	0.262	0.332	0.296	0.669	0.606	0.679	0.646	0.615
	09:10:09	27.7	0.113	0.161	0.182	0.175	0.175	0.18	0.171	0.181	0.188	0.171	0.192	0.152	0.169	0.373	0.296	0.235	0.342	0.256	0.698	0.652	0.587	0.648	0.591	0.185	0.182	0.291	0.114	0.319	0.117	0.324	0.466	0.183	0.423	0.174	0.311	0.173	0.182	0.347	0.346	0.288	0.332	0.293	0.67	0.604	0.678	0.644	0.614
	09:15:09	27.7	0.113	0.16	0.181	0.176	0.176	0.181	0.169	0.181	0.187	0.171	0.193	0.153	0.167	0.354	0.295	0.24	0.336	0.264	0.696	0.65	0.586	0.649	0.592	0.185	0.183	0.319	0.114	0.281	0.117	0.334	0.468	0.184	0.423	0.174	0.318	0.174	0.183	0.355	0.353	0.3	0.335	0.309	0.669	0.606	0.677	0.645	0.615
	09:20:09	27.7	0.113	0.161	0.181	0.176	0.177	0.181	0.169	0.182	0.188	0.17	0.186	0.153	0.167	0.359	0.313	0.241	0.338	0.316	0.696	0.65	0.586	0.648	0.593	0.186	0.184	0.317	0.115	0.31	0.117	0.312	0.47	0.182	0.419	0.176	0.32	0.175	0.184	0.339	0.35	0.318	0.331	0.315	0.668	0.607	0.676	0.646	0.616
	09:25:09	27.7	0.113	0.16	0.181	0.177	0.178	0.181	0.17	0.182	0.186	0.167	0.187	0.154	0.167	0.387	0.31	0.268	0.35	0.306	0.696	0.649	0.586	0.648	0.592	0.187	0.18	0.332	0.114	0.297	0.117	0.349	0.514	0.183	0.418	0.176	0.326	0.176	0.181	0.352	0.356	0.314	0.337	0.313	0.668	0.607	0.675	0.646	0.616
	09:30:09	27.7	0.113	0.161	0.181	0.176	0.178	0.183	0.169	0.183	0.185	0.168	0.18	0.155	0.167	0.373	0.33	0.263	0.337	0.3	0.697	0.651	0.588	0.649	0.593	0.188	0.181	0.273	0.114	0.305	0.118	0.313	0.585	0.178	0.444	0.177	0.327	0.178	0.182	0.342	0.351	0.312	0.33	0.308	0.667	0.606	0.676	0.646	0.616
	09:35:09	27.7	0.113	0.16	0.182	0.177	0.178	0.181	0.169	0.184	0.186	0.169	0.18	0.155	0.165	0.346	0.321	0.283	0.339	0.302	0.699	0.652	0.59	0.65	0.593	0.189	0.178	0.342	0.114	0.263	0.118	0.323	0.584	0.179	0.489	0.177	0.329	0.178	0.183	0.354	0.353	0.313	0.332	0.308	0.668	0.607	0.676	0.647	0.615
	09:40:09	27.7	0.113	0.16	0.183	0.178	0.178	0.177	0.17	0.184	0.186	0.17	0.181	0.156	0.165	0.335	0.343	0.281	0.344	0.311	0.697	0.652	0.589	0.649	0.593	0.188	0.179	0.288	0.115	0.316	0.118	0.317	0.575	0.18	0.516	0.177	0.331	0.177	0.18	0.358	0.365	0.321	0.332	0.316	0.665	0.607	0.676	0.647	0.616
	09:45:09	27.7	0.113	0.16	0.184	0.174	0.178	0.177	0.167	0.179	0.188	0.17	0.183	0.157	0.166	0.337	0.333	0.289	0.34	0.31	0.698	0.652	0.59	0.65	0.594	0.184	0.18	0.334	0.114	0.287	0.116	0.328	0.586	0.18	0.508	0.178	0.333	0.178	0.181	0.365	0.375	0.322	0.335	0.326	0.665	0.605	0.677	0.649	0.613
	09:50:09	27.7	0.113	0.16	0.185	0.173	0.179	0.177	0.168	0.178	0.189	0.171	0.184	0.158	0.165	0.335	0.329	0.351	0.342	0.311	0.696	0.652	0.59	0.65	0.595	0.185	0.18	0.288	0.115	0.318	0.116	0.326	0.599	0.176	0.512	0.179	0.33	0.176	0.181	0.363	0.37	0.317	0.336	0.328	0.666	0.606	0.675	0.649	0.614
	09:55:09	27.7	0.113	0.16	0.185	0.174	0.178	0.172	0.168	0.179	0.19	0.171	0.185	0.159	0.165	0.333	0.338	0.33	0.346	0.316	0.697	0.653	0.592	0.652	0.595	0.186	0.18	0.381	0.115	0.302	0.116	0.331	0.604	0.174	0.511	0.18	0.333	0.177	0.182	0.385	0.386	0.32	0.338	0.316	0.667	0.607	0.676	0.649	0.614
	10:00:09	27.7	0.113	0.16	0.186	0.173	0.17	0.173	0.167	0.18	0.188	0.172	0.181	0.159	0.162	0.33	0.346	0.346	0.353	0.321	0.695	0.653	0.588	0.651	0.596	0.187	0.181	0.336	0.116	0.295	0.116	0.333	0.609	0.175	0.521	0.167	0.337	0.178	0.183	0.378	0.38	0.326	0.346	0.315	0.667	0.608	0.675	0.65	0.613
	10:05:09	27.7	0.113	0.16	0.187	0.173	0.171	0.174	0.167	0.179	0.187	0.173	0.182	0.159	0.163	0.334	0.339	0.329	0.357	0.325	0.694	0.655	0.591	0.65	0.595	0.188	0.182	0.331	0.116	0.294	0.117	0.361	0.611	0.176	0.52	0.164	0.338	0.179	0.184	0.393	0.394	0.332	0.356	0.318	0.667	0.607	0.675	0.65	0.615
	10:10:09	27.7	0.113	0.16	0.188	0.174	0.17	0.175	0.168	0.174	0.187	0.173	0.18	0.158	0.164	0.336	0.345	0.346	0.363	0.33	0.693	0.653	0.591	0.635	0.596	0.189	0.183	0.36	0.115	0.328	0.117	0.359	0.611	0.177	0.536	0.165	0.353	0.18	0.184	0.388	0.388	0.332	0.36	0.317	0.667	0.608	0.676	0.647	0.615
	10:15:09	27.7	0.113	0.16	0.188	0.175	0.17	0.176	0.168	0.175	0.188	0.172	0.18	0.159	0.165	0.338	0.36	0.33	0.365	0.332	0.694	0.652	0.591	0.636	0.596	0.19	0.183	0.368	0.115	0.328	0.117	0.396	0.61	0.176	0.539	0.166	0.412	0.175	0.185	0.39	0.385	0.331	0.368	0.315	0.669	0.61	0.678	0.648	0.616
	10:20:09	27.7	0.113	0.16	0.189	0.176	0.171	0.174	0.168	0.176	0.188	0.171	0.18	0.155	0.165	0.342	0.378	0.34	0.362	0.33	0.695	0.652	0.592	0.637	0.596	0.192	0.183	0.341	0.114	0.35	0.117	0.365	0.61	0.176	0.528	0.163	0.442	0.176	0.186	0.384	0.382	0.328	0.367	0.308	0.67	0.609	0.678	0.648	0.613
	10:25:09	27.7	0.113	0.16	0.19	0.176	0.172	0.174	0.167	0.176	0.181	0.172	0.181	0.156	0.166	0.342	0.378	0.328	0.372	0.331	0.696	0.653	0.592	0.638	0.596	0.193	0.183	0.314	0.114	0.323	0.117	0.379	0.609	0.177	0.527	0.162	0.428	0.177	0.187	0.38	0.379	0.331	0.367	0.311	0.67	0.609	0.678	0.646	0.614
	10:30:09	27.7	0.113	0.16	0.19	0.17	0.172	0.174	0.167	0.176	0.181	0.167	0.182	0.157	0.167	0.341	0.371	0.349	0.38	0.337	0.697	0.653	0.593	0.639	0.597	0.194	0.183	0.343	0.114	0.321	0.118	0.37	0.607	0.178	0.528	0.163	0.464	0.179	0.185	0.372	0.367	0.337	0.359	0.317	0.672	0.609	0.678	0.647	0.611
	10:35:09	27.7	0.113	0.16	0.19	0.171	0.173	0.173	0.168	0.177	0.182	0.158	0.183	0.157	0.168	0.341	0.386	0.339	0.39	0.338	0.698	0.654	0.594	0.641	0.597	0.195	0.184	0.344	0.113	0.338	0.116	0.388	0.607	0.179	0.528	0.158	0.482	0.18	0.185	0.364	0.353	0.34	0.373	0.324	0.673	0.61	0.68	0.648	0.613
	10:40:09	27.7	0.113	0.16	0.185	0.169	0.174	0.173	0.169	0.177	0.183	0.158	0.184	0.158	0.168	0.343	0.382	0.337	0.393	0.339	0.698	0.653	0.593	0.641	0.596	0.194	0.185	0.336	0.114	0.354	0.116	0.37	0.605	0.177	0.528	0.159	0.483	0.173	0.186	0.359	0.346	0.342	0.371	0.325	0.674	0.607	0.678	0.643	0.614
	10:45:09	27.7	0.113	0.159	0.185	0.169	0.175	0.173	0.169	0.178	0.184	0.159	0.184	0.159	0.167	0.344	0.37	0.344	0.392	0.341	0.695	0.652	0.593	0.64	0.597	0.194	0.186	0.315	0.114	0.353	0.116	0.353	0.604	0.178	0.526	0.16	0.492	0.174	0.187	0.352	0.341	0.35	0.364	0.325	0.674	0.607	0.677	0.642	0.614
	10:50:09	27.7	0.113	0.159	0.178	0.17	0.175	0.172	0.17	0.179	0.164	0.16	0.185	0.16	0.167	0.346	0.369	0.355	0.393	0.345	0.696	0.653	0.592	0.641	0.596	0.195	0.187	0.308	0.114	0.356	0.116	0.354	0.603	0.179	0.527	0.16	0.488	0.173	0.187	0.339	0.334	0.357	0.351	0.331	0.673	0.609	0.675	0.644	0.615
	10:55:09	27.7	0.113	0.159	0.179	0.171	0.176	0.173	0.17	0.17	0.165	0.16	0.184	0.16	0.168	0.35	0.363	0.361	0.385	0.35	0.695	0.652	0.592	0.641	0.596	0.189	0.187	0.317	0.114	0.349	0.116	0.344	0.602	0.173	0.525	0.159	0.486	0.174	0.188	0.329	0.33	0.351	0.347	0.355	0.673	0.609	0.674	0.642	0.615
	11:00:09	27.7	0.113	0.159	0.179	0.169	0.173	0.174	0.171	0.17	0.164	0.161	0.172	0.161	0.168	0.349	0.357	0.369	0.38	0.356	0.696	0.653	0.594	0.642	0.597	0.186	0.186	0.338	0.114	0.338	0.115	0.341	0.602	0.174	0.526	0.16	0.481	0.175	0.186	0.326	0.329	0.366	0.344	0.332	0.673	0.61	0.67	0.643	0.614
	11:05:09	27.7	0.113	0.159	0.179	0.17	0.174	0.175	0.172	0.171	0.166	0.162	0.17	0.162	0.169	0.348	0.348	0.36	0.374	0.35	0.696	0.653	0.594	0.644	0.597	0.186	0.182	0.353	0.115	0.325	0.116	0.338	0.601	0.175	0.523	0.16	0.482	0.176	0.187	0.324	0.328	0.368	0.341	0.344	0.672	0.612	0.671	0.645	0.613
	11:10:09	27.7	0.113	0.159	0.179	0.169	0.174	0.169	0.172	0.17	0.162	0.161	0.169	0.163	0.17	0.35	0.342	0.362	0.368	0.353	0.696	0.653	0.595	0.643	0.599	0.188	0.183	0.328	0.115	0.319	0.115	0.338	0.6	0.172	0.521	0.155	0.482	0.174	0.187	0.322	0.326	0.367	0.335	0.335	0.672	0.613	0.671	0.646	0.613
	11:15:09	27.7	0.113	0.159	0.179	0.17	0.175	0.169	0.173	0.171	0.163	0.158	0.169	0.153	0.167	0.351	0.339	0.359	0.362	0.351	0.697	0.65	0.597	0.643	0.598	0.188	0.18	0.314	0.115	0.324	0.115	0.346	0.601	0.173	0.523	0.152	0.482	0.166	0.188	0.324	0.328	0.36	0.331	0.333	0.673	0.614	0.671	0.648	0.615
	11:20:09	27.7	0.113	0.159	0.178	0.17	0.176	0.169	0.173	0.172	0.163	0.158	0.168	0.154	0.168	0.351	0.332	0.36	0.359	0.352	0.697	0.649	0.599	0.643	0.599	0.189	0.18	0.308	0.116	0.326	0.116	0.342	0.599	0.174	0.523	0.153	0.483	0.168	0.188	0.325	0.326	0.349	0.329	0.34	0.673	0.612	0.67	0.649	0.616
	11:25:09	27.7	0.113	0.159	0.178	0.17	0.177	0.169	0.174	0.165	0.164	0.159	0.168	0.145	0.168	0.35	0.331	0.363	0.355	0.349	0.698	0.649	0.599	0.644	0.599	0.188	0.181	0.306	0.115	0.325	0.115	0.335	0.598	0.175	0.522	0.151	0.484	0.168	0.179	0.322	0.323	0.339	0.323	0.332	0.674	0.611	0.67	0.65	0.617
	11:30:09	27.7	0.113	0.159	0.176	0.171	0.178	0.17	0.171	0.166	0.162	0.16	0.169	0.146	0.169	0.353	0.333	0.364	0.353	0.345	0.698	0.65	0.6	0.645	0.601	0.189	0.182	0.311	0.115	0.324	0.116	0.336	0.598	0.176	0.522	0.152	0.485	0.169	0.179	0.32	0.321	0.333	0.322	0.327	0.674	0.612	0.67	0.647	0.617
	11:35:09	27.7	0.113	0.159	0.177	0.172	0.178	0.17	0.172	0.162	0.163	0.161	0.17	0.146	0.169	0.357	0.336	0.36	0.355	0.344	0.694	0.649	0.599	0.644	0.602	0.189	0.182	0.323	0.114	0.326	0.116	0.339	0.598	0.174	0.52	0.153	0.485	0.171	0.18	0.32	0.321	0.325	0.321	0.324	0.673	0.612	0.668	0.645	0.618
	11:40:09	27.7	0.113	0.159	0.177	0.172	0.179	0.17	0.172	0.162	0.164	0.161	0.17	0.146	0.17	0.355	0.338	0.357	0.353	0.34	0.694	0.65	0.598	0.645	0.603	0.191	0.177	0.344	0.113	0.327	0.116	0.335	0.597	0.175	0.519	0.154	0.486	0.172	0.176	0.322	0.323	0.319	0.321	0.321	0.672	0.613	0.668	0.643	0.618
	11:45:09	27.7	0.113	0.159	0.174	0.173	0.18	0.17	0.172	0.162	0.165	0.16	0.171	0.147	0.17	0.355	0.336	0.35	0.352	0.333	0.694	0.65	0.599	0.645	0.603	0.192	0.177	0.358	0.113	0.327	0.117	0.335	0.597	0.175	0.519	0.154	0.478	0.173	0.177	0.324	0.322	0.315	0.321	0.318	0.673	0.615	0.668	0.644	0.619
	11:50:09	27.7	0.113	0.159	0.175	0.173	0.18	0.171	0.173	0.162	0.165	0.161	0.172	0.142	0.17	0.356	0.336	0.344	0.354	0.332	0.695	0.651	0.601	0.645	0.604	0.193	0.178	0.342	0.113	0.328	0.116	0.338	0.597	0.176	0.519	0.155	0.479	0.174	0.178	0.325	0.322	0.314	0.323	0.317	0.671	0.616	0.667	0.644	0.619
	11:55:09	27.7	0.113	0.159	0.172	0.173	0.181	0.17	0.172	0.163	0.166	0.162	0.173	0.143	0.165	0.361	0.336	0.34	0.354	0.331	0.694	0.652	0.602	0.645	0.603	0.194	0.177	0.326	0.112	0.33	0.115	0.336	0.594	0.177	0.519	0.155	0.479	0.167	0.176	0.325	0.321	0.311	0.322	0.316	0.672	0.617	0.667	0.645	0.62
	12:00:09	27.7	0.113	0.159	0.172	0.174	0.183	0.171	0.165	0.164	0.166	0.154	0.174	0.142	0.166	0.359	0.336	0.335	0.351	0.326	0.693	0.652	0.602	0.644	0.603	0.186	0.178	0.319	0.112	0.329	0.114	0.333	0.593	0.173	0.519	0.156	0.481	0.168	0.177	0.328	0.323	0.312	0.324	0.314	0.673	0.618	0.668	0.647	0.619
	12:05:09	27.7	0.113	0.159	0.172	0.174	0.183	0.171	0.164	0.164	0.164	0.154	0.175	0.143	0.166	0.361	0.335	0.331	0.349	0.325	0.694	0.651	0.605	0.646	0.604	0.184	0.178	0.316	0.111	0.328	0.114	0.331	0.595	0.174	0.516	0.149	0.481	0.169	0.177	0.325	0.321	0.31	0.321	0.31	0.674	0.619	0.665	0.649	0.62
	12:10:09	27.7	0.113	0.159	0.172	0.173	0.184	0.168	0.164	0.164	0.164	0.155	0.175	0.143	0.167	0.36	0.336	0.332	0.344	0.324	0.694	0.65	0.606	0.646	0.604	0.185	0.179	0.317	0.11	0.325	0.114	0.331	0.594	0.175	0.513	0.15	0.481	0.17	0.178	0.326	0.322	0.31	0.322	0.31	0.674	0.619	0.665	0.649	0.621
	12:15:09	27.7	0.113	0.159	0.173	0.167	0.185	0.168	0.165	0.165	0.164	0.155	0.176	0.143	0.168	0.362	0.339	0.336	0.345	0.324	0.693	0.649	0.604	0.646	0.605	0.184	0.174	0.328	0.11	0.328	0.114	0.328	0.593	0.17	0.509	0.151	0.481	0.171	0.179	0.327	0.324	0.312	0.322	0.311	0.672	0.621	0.664	0.648	0.622
	12:20:09	27.7	0.113	0.159	0.174	0.168	0.181	0.168	0.165	0.166	0.164	0.156	0.176	0.144	0.169	0.358	0.339	0.336	0.343	0.323	0.693	0.648	0.606	0.646	0.607	0.178	0.173	0.343	0.11	0.327	0.114	0.325	0.594	0.17	0.509	0.151	0.482	0.17	0.179	0.326	0.324	0.312	0.32	0.311	0.672	0.622	0.665	0.649	0.622
	12:25:09	27.7	0.113	0.159	0.174	0.167	0.182	0.169	0.165	0.167	0.165	0.157	0.177	0.144	0.169	0.36	0.341	0.337	0.342	0.323	0.692	0.648	0.604	0.643	0.608	0.169	0.174	0.359	0.11	0.331	0.114	0.323	0.594	0.171	0.509	0.152	0.484	0.171	0.179	0.326	0.325	0.312	0.319	0.311	0.67	0.62	0.664	0.649	0.623
	12:30:09	27.7	0.113	0.159	0.175	0.168	0.179	0.17	0.166	0.167	0.165	0.157	0.178	0.145	0.169	0.356	0.34	0.336	0.339	0.321	0.693	0.649	0.605	0.644	0.606	0.17	0.175	0.366	0.11	0.331	0.114	0.32	0.594	0.172	0.508	0.153	0.485	0.172	0.179	0.325	0.323	0.309	0.317	0.31	0.671	0.619	0.661	0.65	0.623
	12:35:09	27.7	0.113	0.159	0.175	0.167	0.179	0.159	0.163	0.167	0.166	0.156	0.178	0.145	0.166	0.356	0.341	0.334	0.336	0.322	0.693	0.644	0.606	0.644	0.606	0.153	0.176	0.367	0.111	0.333	0.114	0.334	0.594	0.172	0.508	0.153	0.485	0.173	0.18	0.323	0.322	0.309	0.316	0.31	0.671	0.62	0.66	0.649	0.621
	12:40:09	27.7	0.113	0.158	0.176	0.167	0.179	0.159	0.164	0.159	0.166	0.156	0.179	0.146	0.167	0.359	0.344	0.337	0.341	0.324	0.691	0.643	0.601	0.644	0.607	0.154	0.175	0.37	0.111	0.339	0.114	0.343	0.594	0.167	0.502	0.154	0.486	0.174	0.178	0.325	0.321	0.309	0.317	0.311	0.672	0.621	0.659	0.65	0.622
	12:45:09	27.7	0.113	0.159	0.174	0.168	0.175	0.16	0.162	0.158	0.167	0.157	0.18	0.147	0.168	0.361	0.344	0.337	0.342	0.322	0.69	0.642	0.601	0.644	0.608	0.145	0.173	0.359	0.111	0.337	0.113	0.325	0.589	0.168	0.501	0.155	0.486	0.175	0.179	0.328	0.323	0.31	0.318	0.313	0.672	0.621	0.66	0.651	0.622
	12:50:09	27.7	0.113	0.158	0.174	0.168	0.175	0.16	0.163	0.156	0.167	0.158	0.18	0.147	0.168	0.36	0.344	0.336	0.343	0.323	0.687	0.641	0.602	0.644	0.604	0.145	0.172	0.346	0.111	0.335	0.113	0.342	0.586	0.168	0.5	0.155	0.486	0.176	0.18	0.327	0.324	0.309	0.318	0.312	0.671	0.623	0.66	0.651	0.623
	12:55:09	27.7	0.113	0.159	0.174	0.169	0.174	0.151	0.163	0.157	0.167	0.158	0.181	0.148	0.166	0.357	0.342	0.334	0.34	0.32	0.689	0.643	0.603	0.644	0.606	0.145	0.173	0.332	0.111	0.331	0.113	0.331	0.586	0.169	0.5	0.153	0.488	0.177	0.18	0.326	0.323	0.31	0.318	0.312	0.671	0.623	0.66	0.651	0.624
	13:00:09	27.7	0.113	0.158	0.169	0.17	0.173	0.152	0.164	0.153	0.168	0.159	0.182	0.149	0.167	0.36	0.342	0.333	0.34	0.319	0.687	0.641	0.605	0.643	0.607	0.145	0.173	0.33	0.112	0.335	0.113	0.325	0.585	0.17	0.499	0.153	0.488	0.178	0.181	0.326	0.324	0.312	0.319	0.314	0.671	0.62	0.658	0.652	0.623
	13:05:09	27.7	0.113	0.159	0.169	0.17	0.174	0.153	0.164	0.153	0.169	0.159	0.183	0.149	0.165	0.359	0.34	0.331	0.338	0.314	0.683	0.635	0.599	0.638	0.603	0.146	0.174	0.332	0.112	0.335	0.113	0.332	0.583	0.171	0.497	0.154	0.486	0.179	0.179	0.325	0.325	0.309	0.317	0.311	0.668	0.618	0.657	0.647	0.621
	13:10:09	27.7	0.113	0.158	0.169	0.171	0.172	0.153	0.165	0.154	0.164	0.16	0.183	0.15	0.166	0.359	0.342	0.335	0.343	0.32	0.689	0.641	0.606	0.644	0.608	0.146	0.174	0.338	0.112	0.34	0.113	0.336	0.585	0.172	0.499	0.154	0.489	0.18	0.178	0.324	0.325	0.31	0.319	0.313	0.671	0.623	0.66	0.652	0.625
	13:15:09	27.7	0.113	0.159	0.17	0.171	0.173	0.154	0.166	0.155	0.162	0.161	0.184	0.15	0.166	0.361	0.342	0.335	0.342	0.319	0.688	0.64	0.606	0.645	0.609	0.147	0.175	0.35	0.111	0.337	0.114	0.338	0.586	0.17	0.498	0.15	0.49	0.181	0.174	0.327	0.326	0.313	0.319	0.314	0.671	0.624	0.658	0.651	0.627
	13:20:09	27.7	0.113	0.159	0.171	0.172	0.17	0.154	0.167	0.155	0.163	0.161	0.185	0.151	0.167	0.361	0.344	0.336	0.341	0.319	0.688	0.637	0.608	0.645	0.608	0.148	0.176	0.361	0.112	0.339	0.113	0.338	0.587	0.162	0.498	0.15	0.489	0.182	0.175	0.327	0.327	0.313	0.319	0.313	0.671	0.624	0.659	0.652	0.63
	13:25:09	27.7	0.113	0.158	0.171	0.172	0.171	0.154	0.167	0.156	0.163	0.155	0.185	0.152	0.168	0.359	0.342	0.333	0.339	0.316	0.689	0.636	0.61	0.645	0.609	0.148	0.177	0.368	0.112	0.335	0.114	0.335	0.586	0.161	0.497	0.15	0.49	0.177	0.175	0.326	0.326	0.31	0.319	0.311	0.671	0.623	0.659	0.652	0.631
	13:30:09	27.7	0.113	0.158	0.172	0.173	0.17	0.155	0.165	0.156	0.164	0.156	0.186	0.15	0.168	0.361	0.342	0.332	0.339	0.316	0.69	0.636	0.61	0.643	0.61	0.148	0.177	0.373	0.111	0.336	0.114	0.343	0.586	0.161	0.496	0.15	0.492	0.166	0.171	0.326	0.326	0.309	0.319	0.311	0.672	0.625	0.659	0.653	0.631
	13:35:09	27.7	0.113	0.158	0.172	0.174	0.171	0.156	0.166	0.157	0.165	0.155	0.187	0.152	0.169	0.36	0.341	0.334	0.34	0.318	0.692	0.635	0.612	0.644	0.611	0.149	0.171	0.369	0.111	0.334	0.114	0.338	0.584	0.161	0.496	0.147	0.488	0.167	0.169	0.327	0.327	0.31	0.319	0.31	0.672	0.626	0.66	0.654	0.633
	13:40:09	27.7	0.113	0.158	0.173	0.173	0.171	0.156	0.166	0.157	0.165	0.155	0.185	0.152	0.17	0.356	0.34	0.332	0.337	0.316	0.692	0.634	0.605	0.643	0.612	0.149	0.17	0.361	0.111	0.33	0.114	0.335	0.585	0.162	0.496	0.148	0.484	0.167	0.17	0.325	0.328	0.311	0.318	0.31	0.672	0.627	0.66	0.655	0.634
	13:45:09	27.7	0.113	0.158	0.174	0.173	0.166	0.157	0.167	0.158	0.165	0.155	0.186	0.152	0.17	0.36	0.342	0.334	0.337	0.314	0.69	0.633	0.607	0.644	0.613	0.15	0.17	0.363	0.112	0.334	0.114	0.338	0.585	0.163	0.496	0.148	0.485	0.168	0.17	0.325	0.327	0.309	0.318	0.31	0.671	0.626	0.66	0.653	0.635
	13:50:09	27.7	0.113	0.158	0.173	0.174	0.167	0.156	0.167	0.158	0.166	0.156	0.187	0.153	0.167	0.364	0.35	0.342	0.344	0.32	0.69	0.634	0.608	0.643	0.605	0.151	0.171	0.37	0.112	0.345	0.114	0.347	0.586	0.163	0.496	0.149	0.485	0.169	0.17	0.329	0.331	0.31	0.322	0.312	0.672	0.627	0.659	0.653	0.636
	13:55:09	27.7	0.113	0.158	0.173	0.172	0.167	0.157	0.168	0.159	0.156	0.156	0.188	0.154	0.166	0.361	0.349	0.34	0.341	0.317	0.69	0.633	0.608	0.644	0.606	0.151	0.171	0.356	0.112	0.337	0.114	0.34	0.586	0.164	0.496	0.149	0.486	0.17	0.171	0.329	0.329	0.311	0.322	0.311	0.673	0.627	0.659	0.653	0.637
	14:00:09	27.7	0.113	0.158	0.172	0.173	0.168	0.155	0.168	0.157	0.156	0.154	0.188	0.154	0.167	0.361	0.346	0.335	0.339	0.313	0.69	0.633	0.608	0.644	0.606	0.152	0.172	0.354	0.112	0.334	0.115	0.339	0.587	0.165	0.496	0.15	0.487	0.171	0.171	0.328	0.329	0.31	0.322	0.31	0.668	0.628	0.659	0.654	0.638
	14:05:09	27.7	0.113	0.158	0.166	0.173	0.168	0.153	0.169	0.157	0.157	0.154	0.189	0.155	0.167	0.364	0.348	0.335	0.341	0.314	0.689	0.632	0.607	0.644	0.606	0.152	0.172	0.356	0.112	0.337	0.115	0.342	0.587	0.166	0.494	0.148	0.487	0.172	0.172	0.329	0.331	0.311	0.323	0.311	0.668	0.625	0.658	0.653	0.638
	14:10:09	27.7	0.113	0.158	0.166	0.173	0.168	0.154	0.169	0.156	0.157	0.155	0.19	0.155	0.168	0.362	0.348	0.335	0.34	0.314	0.688	0.632	0.61	0.645	0.608	0.153	0.172	0.351	0.112	0.335	0.115	0.339	0.588	0.166	0.495	0.148	0.488	0.173	0.172	0.329	0.33	0.31	0.322	0.306	0.668	0.626	0.658	0.655	0.632
	14:15:09	27.7	0.113	0.158	0.166	0.174	0.168	0.154	0.17	0.156	0.158	0.153	0.19	0.156	0.169	0.365	0.349	0.334	0.344	0.316	0.689	0.632	0.611	0.645	0.609	0.153	0.173	0.359	0.112	0.34	0.115	0.344	0.589	0.167	0.495	0.149	0.487	0.174	0.172	0.333	0.334	0.312	0.325	0.308	0.668	0.626	0.657	0.652	0.633
	14:20:09	27.7	0.113	0.158	0.161	0.174	0.161	0.155	0.17	0.157	0.158	0.154	0.17	0.157	0.169	0.364	0.353	0.34	0.344	0.318	0.689	0.632	0.612	0.646	0.608	0.154	0.168	0.359	0.113	0.341	0.115	0.344	0.589	0.168	0.495	0.149	0.486	0.175	0.173	0.335	0.336	0.314	0.327	0.31	0.668	0.626	0.657	0.652	0.632
	14:25:09	27.7	0.113	0.158	0.162	0.175	0.161	0.155	0.171	0.157	0.155	0.154	0.171	0.157	0.169	0.363	0.352	0.343	0.345	0.319	0.689	0.631	0.614	0.647	0.607	0.159	0.169	0.359	0.113	0.339	0.115	0.344	0.59	0.168	0.494	0.15	0.487	0.176	0.174	0.336	0.339	0.313	0.328	0.31	0.668	0.627	0.658	0.651	0.632
	14:30:09	27.7	0.113	0.158	0.162	0.175	0.162	0.156	0.169	0.158	0.155	0.154	0.167	0.157	0.164	0.364	0.351	0.344	0.346	0.319	0.689	0.631	0.615	0.646	0.608	0.159	0.168	0.361	0.113	0.34	0.115	0.344	0.581	0.169	0.49	0.151	0.487	0.173	0.174	0.337	0.34	0.314	0.329	0.31	0.668	0.628	0.658	0.652	0.632
	14:35:09	27.7	0.113	0.158	0.163	0.176	0.162	0.155	0.169	0.158	0.156	0.153	0.167	0.158	0.164	0.366	0.351	0.344	0.346	0.321	0.688	0.632	0.617	0.647	0.609	0.157	0.169	0.362	0.113	0.341	0.115	0.346	0.582	0.17	0.49	0.151	0.488	0.174	0.175	0.34	0.343	0.316	0.33	0.313	0.666	0.629	0.659	0.654	0.634
	14:40:09	27.7	0.113	0.158	0.163	0.176	0.163	0.156	0.161	0.159	0.156	0.154	0.166	0.159	0.165	0.365	0.352	0.344	0.349	0.324	0.688	0.631	0.617	0.646	0.609	0.142	0.164	0.362	0.113	0.342	0.116	0.348	0.583	0.17	0.49	0.151	0.488	0.175	0.175	0.343	0.346	0.318	0.333	0.314	0.665	0.629	0.657	0.653	0.633
	14:45:09	27.7	0.113	0.158	0.164	0.177	0.164	0.156	0.162	0.159	0.157	0.155	0.167	0.16	0.165	0.364	0.353	0.348	0.35	0.326	0.689	0.632	0.618	0.647	0.609	0.14	0.164	0.36	0.114	0.341	0.116	0.346	0.582	0.171	0.49	0.152	0.489	0.174	0.176	0.343	0.348	0.319	0.334	0.316	0.665	0.631	0.659	0.653	0.633
	14:50:09	27.7	0.113	0.157	0.164	0.177	0.164	0.157	0.162	0.16	0.157	0.155	0.167	0.16	0.166	0.363	0.35	0.349	0.348	0.326	0.689	0.633	0.618	0.645	0.609	0.14	0.161	0.358	0.113	0.338	0.116	0.341	0.583	0.168	0.489	0.153	0.483	0.175	0.176	0.342	0.348	0.319	0.334	0.315	0.666	0.63	0.658	0.653	0.632
	14:55:09	27.7	0.113	0.157	0.162	0.177	0.165	0.157	0.161	0.161	0.158	0.156	0.168	0.161	0.16	0.364	0.347	0.345	0.346	0.323	0.688	0.633	0.62	0.644	0.609	0.141	0.161	0.358	0.114	0.338	0.116	0.341	0.583	0.169	0.489	0.153	0.484	0.176	0.169	0.341	0.347	0.319	0.334	0.315	0.666	0.63	0.658	0.651	0.631
	15:00:09	27.7	0.113	0.157	0.159	0.178	0.166	0.158	0.161	0.161	0.158	0.156	0.169	0.161	0.161	0.364	0.35	0.348	0.349	0.326	0.689	0.633	0.62	0.645	0.61	0.142	0.155	0.362	0.114	0.342	0.116	0.345	0.584	0.168	0.49	0.154	0.485	0.176	0.164	0.343	0.346	0.321	0.335	0.315	0.666	0.631	0.659	0.651	0.631
	15:05:09	27.7	0.113	0.157	0.157	0.178	0.164	0.159	0.161	0.161	0.159	0.157	0.163	0.162	0.162	0.365	0.351	0.35	0.35	0.328	0.691	0.634	0.623	0.646	0.612	0.142	0.155	0.364	0.114	0.342	0.116	0.344	0.585	0.169	0.49	0.154	0.486	0.177	0.165	0.345	0.347	0.322	0.337	0.316	0.666	0.632	0.66	0.651	0.632
	15:10:09	27.7	0.113	0.157	0.157	0.173	0.165	0.148	0.162	0.162	0.158	0.158	0.163	0.162	0.162	0.366	0.354	0.353	0.352	0.328	0.689	0.632	0.622	0.645	0.612	0.142	0.156	0.366	0.114	0.344	0.117	0.346	0.585	0.17	0.489	0.155	0.485	0.178	0.165	0.347	0.351	0.323	0.34	0.317	0.666	0.633	0.66	0.649	0.632
	15:15:09	27.7	0.113	0.157	0.157	0.174	0.165	0.149	0.163	0.163	0.159	0.158	0.164	0.163	0.163	0.366	0.353	0.357	0.353	0.33	0.69	0.63	0.624	0.647	0.613	0.143	0.155	0.363	0.115	0.343	0.117	0.345	0.586	0.17	0.489	0.155	0.485	0.179	0.166	0.346	0.35	0.323	0.34	0.318	0.665	0.632	0.661	0.649	0.633
	15:20:09	27.7	0.113	0.157	0.158	0.171	0.166	0.149	0.163	0.163	0.159	0.159	0.164	0.164	0.163	0.367	0.354	0.357	0.352	0.329	0.69	0.631	0.626	0.649	0.615	0.143	0.155	0.363	0.114	0.343	0.117	0.345	0.586	0.166	0.49	0.154	0.485	0.179	0.166	0.347	0.348	0.323	0.34	0.318	0.666	0.632	0.662	0.65	0.634
	15:25:09	27.7	0.113	0.157	0.158	0.171	0.167	0.15	0.164	0.164	0.16	0.159	0.163	0.165	0.161	0.367	0.352	0.355	0.349	0.33	0.69	0.631	0.627	0.649	0.616	0.143	0.155	0.361	0.115	0.341	0.117	0.342	0.588	0.166	0.49	0.154	0.486	0.18	0.167	0.347	0.35	0.321	0.339	0.319	0.667	0.632	0.662	0.648	0.635
	15:30:09	27.7	0.113	0.157	0.159	0.172	0.165	0.15	0.16	0.164	0.155	0.16	0.164	0.165	0.161	0.366	0.35	0.351	0.347	0.327	0.689	0.631	0.628	0.649	0.616	0.144	0.155	0.363	0.115	0.339	0.117	0.338	0.586	0.166	0.491	0.155	0.486	0.181	0.167	0.346	0.344	0.321	0.339	0.319	0.668	0.632	0.662	0.648	0.634
	15:35:09	27.7	0.113	0.157	0.158	0.172	0.166	0.151	0.16	0.165	0.155	0.16	0.165	0.165	0.162	0.367	0.354	0.356	0.349	0.329	0.689	0.631	0.628	0.645	0.617	0.144	0.154	0.364	0.115	0.344	0.118	0.341	0.586	0.167	0.491	0.155	0.485	0.182	0.168	0.347	0.342	0.321	0.339	0.32	0.668	0.634	0.661	0.648	0.634
	15:40:09	27.7	0.113	0.157	0.158	0.173	0.166	0.151	0.161	0.165	0.155	0.161	0.166	0.163	0.162	0.366	0.356	0.359	0.35	0.332	0.691	0.631	0.63	0.646	0.618	0.144	0.154	0.362	0.115	0.342	0.118	0.341	0.586	0.156	0.492	0.156	0.485	0.183	0.168	0.347	0.356	0.322	0.341	0.319	0.666	0.635	0.662	0.644	0.636
	15:45:09	27.7	0.113	0.157	0.158	0.173	0.167	0.151	0.161	0.165	0.156	0.161	0.165	0.163	0.163	0.367	0.356	0.352	0.35	0.33	0.69	0.631	0.62	0.647	0.619	0.144	0.155	0.367	0.116	0.342	0.118	0.341	0.587	0.156	0.492	0.156	0.486	0.174	0.168	0.349	0.351	0.322	0.336	0.317	0.665	0.635	0.661	0.644	0.636
	15:50:09	27.7	0.113	0.157	0.159	0.174	0.168	0.151	0.162	0.166	0.156	0.162	0.167	0.164	0.159	0.368	0.359	0.348	0.35	0.33	0.688	0.631	0.619	0.648	0.614	0.145	0.151	0.364	0.116	0.345	0.118	0.342	0.584	0.157	0.492	0.156	0.484	0.175	0.169	0.348	0.352	0.322	0.335	0.316	0.664	0.635	0.659	0.641	0.637
	15:55:09	27.7	0.113	0.157	0.159	0.174	0.169	0.151	0.162	0.167	0.157	0.162	0.167	0.164	0.155	0.368	0.361	0.346	0.355	0.334	0.688	0.631	0.62	0.647	0.613	0.146	0.151	0.365	0.116	0.347	0.119	0.344	0.579	0.157	0.493	0.157	0.484	0.175	0.17	0.351	0.347	0.326	0.34	0.319	0.665	0.636	0.658	0.641	0.634
	16:00:09	27.7	0.113	0.157	0.16	0.175	0.169	0.152	0.163	0.166	0.157	0.162	0.167	0.165	0.155	0.366	0.361	0.351	0.353	0.336	0.687	0.632	0.618	0.646	0.614	0.146	0.147	0.362	0.116	0.345	0.119	0.346	0.576	0.157	0.493	0.157	0.484	0.176	0.17	0.35	0.351	0.325	0.34	0.322	0.664	0.636	0.658	0.64	0.633
	16:05:09	27.7	0.113	0.157	0.161	0.175	0.169	0.152	0.163	0.167	0.158	0.163	0.167	0.166	0.155	0.368	0.36	0.355	0.354	0.337	0.688	0.632	0.62	0.646	0.614	0.146	0.147	0.365	0.116	0.345	0.119	0.348	0.576	0.157	0.493	0.156	0.484	0.163	0.17	0.353	0.358	0.327	0.342	0.324	0.665	0.637	0.66	0.641	0.635
	16:10:09	27.7	0.113	0.157	0.161	0.175	0.17	0.153	0.163	0.168	0.158	0.153	0.168	0.166	0.156	0.369	0.362	0.353	0.349	0.336	0.686	0.632	0.62	0.647	0.614	0.146	0.148	0.364	0.117	0.345	0.12	0.35	0.578	0.158	0.493	0.157	0.484	0.162	0.17	0.351	0.354	0.328	0.34	0.326	0.666	0.636	0.659	0.64	0.636
	16:15:09	27.7	0.113	0.157	0.162	0.176	0.17	0.153	0.164	0.168	0.159	0.154	0.169	0.167	0.156	0.37	0.365	0.352	0.355	0.339	0.684	0.632	0.622	0.647	0.615	0.143	0.148	0.37	0.116	0.349	0.12	0.356	0.578	0.159	0.494	0.157	0.485	0.162	0.17	0.358	0.358	0.33	0.346	0.329	0.666	0.637	0.66	0.64	0.632
	16:20:09	27.7	0.113	0.157	0.163	0.175	0.156	0.154	0.165	0.169	0.16	0.154	0.17	0.168	0.156	0.367	0.367	0.357	0.354	0.342	0.684	0.633	0.622	0.646	0.615	0.143	0.148	0.368	0.117	0.348	0.119	0.351	0.578	0.159	0.494	0.158	0.485	0.163	0.17	0.356	0.361	0.326	0.347	0.33	0.667	0.638	0.655	0.64	0.632
	16:25:09	27.7	0.113	0.157	0.163	0.175	0.157	0.154	0.165	0.169	0.153	0.155	0.17	0.168	0.155	0.367	0.362	0.352	0.349	0.336	0.682	0.633	0.624	0.646	0.615	0.143	0.149	0.367	0.117	0.345	0.119	0.348	0.578	0.16	0.495	0.148	0.485	0.164	0.171	0.352	0.355	0.324	0.343	0.329	0.666	0.638	0.654	0.641	0.632
	16:30:09	27.7	0.113	0.157	0.164	0.175	0.155	0.155	0.157	0.169	0.152	0.155	0.171	0.168	0.156	0.369	0.362	0.35	0.353	0.339	0.682	0.634	0.624	0.646	0.615	0.143	0.149	0.368	0.116	0.35	0.12	0.353	0.579	0.16	0.495	0.149	0.477	0.164	0.171	0.356	0.357	0.326	0.346	0.331	0.667	0.638	0.655	0.641	0.632
	16:35:09	27.7	0.113	0.157	0.164	0.176	0.156	0.152	0.157	0.17	0.152	0.155	0.171	0.168	0.156	0.37	0.361	0.347	0.35	0.34	0.681	0.634	0.625	0.647	0.616	0.144	0.15	0.366	0.117	0.346	0.12	0.351	0.58	0.161	0.495	0.15	0.478	0.164	0.172	0.353	0.358	0.324	0.344	0.331	0.667	0.638	0.655	0.642	0.632
	16:40:09	27.7	0.113	0.157	0.16	0.177	0.156	0.152	0.157	0.17	0.153	0.154	0.172	0.169	0.157	0.371	0.364	0.348	0.353	0.342	0.68	0.635	0.625	0.647	0.617	0.144	0.15	0.37	0.116	0.35	0.118	0.355	0.58	0.16	0.497	0.15	0.478	0.165	0.172	0.357	0.355	0.327	0.346	0.333	0.668	0.638	0.656	0.642	0.633
	16:45:09	27.7	0.113	0.157	0.159	0.177	0.157	0.152	0.158	0.168	0.153	0.154	0.163	0.17	0.157	0.372	0.366	0.353	0.358	0.348	0.679	0.636	0.625	0.648	0.617	0.145	0.151	0.373	0.117	0.353	0.118	0.358	0.581	0.161	0.497	0.151	0.477	0.166	0.173	0.36	0.366	0.329	0.347	0.335	0.668	0.639	0.656	0.642	0.633
	16:50:09	27.7	0.113	0.157	0.16	0.177	0.157	0.152	0.158	0.169	0.154	0.155	0.163	0.171	0.158	0.371	0.367	0.358	0.358	0.346	0.679	0.636	0.625	0.648	0.618	0.145	0.152	0.374	0.113	0.352	0.118	0.36	0.576	0.162	0.496	0.152	0.479	0.167	0.173	0.365	0.372	0.334	0.354	0.342	0.669	0.64	0.657	0.642	0.634
	16:55:09	27.7	0.113	0.157	0.16	0.178	0.158	0.153	0.159	0.169	0.154	0.155	0.164	0.172	0.158	0.37	0.362	0.354	0.351	0.34	0.68	0.634	0.626	0.649	0.619	0.144	0.152	0.374	0.113	0.348	0.118	0.356	0.575	0.162	0.496	0.152	0.479	0.168	0.174	0.358	0.363	0.33	0.348	0.338	0.67	0.641	0.658	0.643	0.632
	17:00:09	27.6	0.113	0.157	0.16	0.178	0.158	0.153	0.16	0.167	0.155	0.152	0.165	0.172	0.158	0.371	0.362	0.35	0.351	0.339	0.68	0.634	0.627	0.65	0.619	0.135	0.152	0.377	0.113	0.351	0.118	0.357	0.575	0.16	0.497	0.152	0.48	0.168	0.175	0.357	0.355	0.327	0.347	0.337	0.671	0.641	0.659	0.643	0.633
	17:05:09	27.6	0.113	0.157	0.16	0.179	0.159	0.154	0.16	0.167	0.155	0.153	0.157	0.173	0.159	0.374	0.367	0.353	0.355	0.344	0.68	0.635	0.628	0.65	0.621	0.135	0.151	0.379	0.113	0.357	0.119	0.36	0.575	0.161	0.499	0.153	0.48	0.168	0.174	0.36	0.366	0.329	0.351	0.337	0.671	0.643	0.66	0.641	0.634
	17:10:09	27.6	0.113	0.157	0.156	0.156	0.159	0.155	0.161	0.168	0.156	0.153	0.157	0.173	0.159	0.375	0.369	0.36	0.36	0.35	0.682	0.636	0.629	0.651	0.62	0.135	0.152	0.38	0.113	0.359	0.119	0.365	0.576	0.151	0.5	0.153	0.48	0.169	0.175	0.366	0.372	0.332	0.355	0.34	0.672	0.643	0.66	0.641	0.635
	17:15:09	27.7	0.113	0.157	0.156	0.15	0.16	0.155	0.161	0.156	0.156	0.154	0.151	0.174	0.16	0.374	0.368	0.36	0.355	0.345	0.679	0.636	0.629	0.651	0.621	0.135	0.152	0.379	0.113	0.356	0.119	0.365	0.575	0.151	0.5	0.153	0.48	0.17	0.175	0.364	0.365	0.331	0.353	0.341	0.672	0.643	0.66	0.641	0.635
	17:20:09	27.6	0.113	0.156	0.157	0.15	0.158	0.154	0.156	0.156	0.156	0.154	0.151	0.174	0.16	0.374	0.364	0.358	0.353	0.346	0.68	0.637	0.631	0.652	0.622	0.136	0.152	0.38	0.113	0.355	0.119	0.364	0.575	0.151	0.501	0.154	0.482	0.17	0.176	0.361	0.366	0.331	0.352	0.34	0.673	0.644	0.66	0.641	0.636
	17:25:09	27.6	0.113	0.156	0.157	0.15	0.159	0.155	0.157	0.157	0.157	0.155	0.151	0.175	0.161	0.376	0.365	0.357	0.353	0.343	0.681	0.637	0.632	0.653	0.621	0.136	0.152	0.38	0.113	0.356	0.119	0.365	0.575	0.152	0.501	0.154	0.483	0.171	0.176	0.362	0.362	0.33	0.354	0.341	0.671	0.643	0.66	0.641	0.635
	17:30:09	27.7	0.113	0.156	0.158	0.151	0.159	0.155	0.157	0.157	0.157	0.143	0.151	0.176	0.161	0.376	0.368	0.358	0.353	0.343	0.682	0.637	0.632	0.652	0.623	0.136	0.152	0.381	0.113	0.355	0.12	0.363	0.576	0.152	0.502	0.155	0.484	0.171	0.177	0.364	0.368	0.334	0.356	0.341	0.671	0.643	0.661	0.642	0.636
	17:35:09	27.6	0.113	0.156	0.158	0.151	0.158	0.149	0.151	0.158	0.158	0.144	0.151	0.177	0.162	0.376	0.372	0.362	0.359	0.347	0.681	0.637	0.631	0.653	0.622	0.137	0.152	0.381	0.113	0.357	0.12	0.368	0.575	0.144	0.502	0.156	0.483	0.16	0.177	0.367	0.374	0.335	0.361	0.346	0.668	0.643	0.662	0.642	0.636
	17:40:09	27.6	0.113	0.156	0.159	0.151	0.158	0.15	0.152	0.158	0.152	0.145	0.152	0.177	0.162	0.377	0.37	0.362	0.357	0.347	0.683	0.637	0.632	0.651	0.62	0.137	0.153	0.38	0.114	0.355	0.12	0.366	0.575	0.145	0.504	0.156	0.482	0.16	0.178	0.365	0.372	0.336	0.359	0.347	0.669	0.643	0.657	0.641	0.632
	17:45:09	27.7	0.113	0.156	0.159	0.151	0.159	0.149	0.152	0.158	0.153	0.145	0.152	0.178	0.163	0.377	0.367	0.36	0.357	0.347	0.683	0.638	0.633	0.651	0.621	0.138	0.153	0.381	0.114	0.356	0.12	0.366	0.576	0.145	0.505	0.157	0.484	0.158	0.178	0.363	0.37	0.334	0.358	0.345	0.67	0.643	0.658	0.641	0.629
	17:50:09	27.7	0.113	0.156	0.16	0.152	0.158	0.15	0.152	0.159	0.153	0.146	0.153	0.179	0.161	0.378	0.368	0.364	0.361	0.35	0.682	0.639	0.634	0.652	0.622	0.138	0.154	0.384	0.114	0.359	0.121	0.375	0.575	0.145	0.506	0.157	0.485	0.158	0.179	0.368	0.371	0.337	0.361	0.347	0.67	0.644	0.659	0.64	0.628
	17:55:09	27.6	0.113	0.156	0.16	0.152	0.159	0.15	0.152	0.16	0.154	0.146	0.153	0.18	0.162	0.377	0.368	0.362	0.359	0.348	0.682	0.64	0.634	0.65	0.622	0.138	0.154	0.384	0.114	0.357	0.121	0.369	0.576	0.146	0.507	0.158	0.485	0.159	0.178	0.365	0.373	0.339	0.36	0.347	0.67	0.644	0.658	0.64	0.628
	18:00:09	27.7	0.113	0.156	0.16	0.152	0.159	0.151	0.153	0.151	0.154	0.147	0.153	0.181	0.162	0.377	0.371	0.36	0.352	0.349	0.683	0.641	0.635	0.651	0.623	0.139	0.155	0.385	0.114	0.359	0.121	0.372	0.576	0.146	0.508	0.159	0.486	0.159	0.172	0.365	0.371	0.337	0.358	0.345	0.671	0.645	0.659	0.641	0.629
	18:05:09	27.6	0.113	0.156	0.161	0.149	0.153	0.151	0.153	0.151	0.154	0.147	0.153	0.159	0.162	0.378	0.372	0.357	0.351	0.348	0.683	0.642	0.634	0.651	0.624	0.139	0.155	0.385	0.114	0.359	0.121	0.37	0.571	0.146	0.507	0.159	0.483	0.16	0.171	0.362	0.37	0.335	0.356	0.343	0.671	0.645	0.659	0.641	0.629
	18:10:09	27.6	0.113	0.156	0.161	0.149	0.154	0.149	0.153	0.152	0.155	0.148	0.154	0.16	0.163	0.378	0.373	0.359	0.354	0.351	0.683	0.642	0.635	0.651	0.625	0.139	0.156	0.388	0.114	0.361	0.122	0.376	0.572	0.147	0.509	0.16	0.484	0.161	0.172	0.369	0.373	0.34	0.362	0.347	0.672	0.646	0.658	0.642	0.629
	18:15:09	27.6	0.113	0.156	0.162	0.15	0.154	0.149	0.154	0.152	0.156	0.149	0.155	0.16	0.163	0.376	0.369	0.356	0.35	0.347	0.682	0.643	0.635	0.652	0.626	0.14	0.155	0.387	0.114	0.358	0.122	0.371	0.567	0.147	0.509	0.16	0.485	0.161	0.172	0.364	0.374	0.338	0.359	0.345	0.672	0.646	0.657	0.643	0.63
	18:20:09	27.6	0.113	0.156	0.162	0.15	0.155	0.15	0.154	0.152	0.156	0.148	0.155	0.161	0.16	0.376	0.368	0.355	0.351	0.349	0.683	0.644	0.633	0.647	0.627	0.14	0.155	0.387	0.115	0.36	0.122	0.37	0.567	0.147	0.509	0.161	0.486	0.161	0.172	0.363	0.373	0.336	0.361	0.345	0.672	0.646	0.655	0.643	0.631
	18:25:09	27.6	0.113	0.156	0.162	0.151	0.155	0.15	0.155	0.153	0.157	0.148	0.156	0.162	0.16	0.379	0.368	0.356	0.347	0.345	0.685	0.645	0.635	0.649	0.627	0.141	0.156	0.387	0.114	0.359	0.122	0.37	0.561	0.147	0.51	0.161	0.488	0.162	0.172	0.359	0.369	0.334	0.354	0.341	0.673	0.647	0.657	0.645	0.631
	18:30:09	27.6	0.113	0.156	0.163	0.152	0.155	0.151	0.156	0.151	0.157	0.149	0.141	0.162	0.153	0.381	0.371	0.357	0.348	0.344	0.685	0.645	0.635	0.648	0.627	0.141	0.156	0.388	0.115	0.361	0.123	0.373	0.56	0.148	0.511	0.162	0.488	0.162	0.173	0.362	0.367	0.332	0.357	0.342	0.674	0.648	0.657	0.645	0.63
	18:35:09	27.6	0.113	0.156	0.163	0.152	0.15	0.151	0.156	0.151	0.158	0.149	0.141	0.162	0.154	0.38	0.371	0.36	0.352	0.351	0.684	0.646	0.635	0.648	0.627	0.141	0.157	0.389	0.115	0.365	0.123	0.375	0.56	0.148	0.511	0.163	0.488	0.163	0.154	0.366	0.374	0.339	0.363	0.344	0.674	0.643	0.657	0.644	0.63
	18:40:09	27.7	0.113	0.156	0.163	0.152	0.15	0.152	0.156	0.152	0.158	0.15	0.142	0.162	0.154	0.379	0.371	0.363	0.358	0.358	0.684	0.646	0.636	0.649	0.628	0.142	0.149	0.388	0.115	0.367	0.12	0.379	0.561	0.149	0.512	0.163	0.489	0.163	0.154	0.37	0.383	0.346	0.368	0.349	0.675	0.643	0.659	0.645	0.63
	18:45:09	27.7	0.113	0.156	0.164	0.153	0.15	0.152	0.157	0.152	0.159	0.151	0.142	0.163	0.154	0.378	0.373	0.364	0.356	0.357	0.684	0.647	0.637	0.65	0.628	0.142	0.15	0.387	0.115	0.365	0.121	0.379	0.561	0.144	0.513	0.164	0.491	0.164	0.154	0.372	0.38	0.344	0.369	0.351	0.676	0.644	0.657	0.645	0.631
	18:50:09	27.6	0.113	0.156	0.164	0.153	0.151	0.152	0.158	0.153	0.159	0.154	0.142	0.163	0.155	0.376	0.373	0.365	0.356	0.355	0.684	0.647	0.638	0.651	0.629	0.143	0.15	0.39	0.115	0.365	0.121	0.378	0.561	0.144	0.514	0.164	0.492	0.165	0.155	0.371	0.382	0.346	0.369	0.351	0.677	0.645	0.658	0.646	0.631
	18:55:09	27.7	0.113	0.156	0.165	0.15	0.151	0.152	0.158	0.153	0.16	0.151	0.143	0.163	0.155	0.376	0.372	0.363	0.354	0.353	0.685	0.648	0.64	0.651	0.63	0.143	0.151	0.39	0.114	0.366	0.116	0.38	0.562	0.144	0.514	0.165	0.493	0.165	0.155	0.37	0.379	0.343	0.367	0.35	0.678	0.646	0.658	0.647	0.63
	19:00:09	27.6	0.113	0.156	0.161	0.151	0.152	0.152	0.158	0.153	0.16	0.151	0.143	0.164	0.155	0.377	0.372	0.36	0.35	0.35	0.685	0.649	0.641	0.652	0.631	0.143	0.151	0.391	0.114	0.364	0.116	0.374	0.562	0.145	0.509	0.165	0.494	0.165	0.155	0.366	0.377	0.342	0.364	0.348	0.678	0.646	0.656	0.647	0.631
	19:05:09	27.6	0.113	0.156	0.162	0.151	0.152	0.153	0.159	0.151	0.161	0.152	0.143	0.164	0.156	0.379	0.374	0.36	0.353	0.351	0.685	0.649	0.64	0.653	0.631	0.144	0.152	0.393	0.115	0.367	0.116	0.38	0.562	0.143	0.51	0.166	0.495	0.166	0.155	0.368	0.374	0.341	0.365	0.347	0.678	0.644	0.657	0.648	0.632
	19:10:09	27.6	0.113	0.156	0.162	0.152	0.153	0.153	0.16	0.152	0.162	0.153	0.144	0.165	0.156	0.377	0.375	0.365	0.353	0.356	0.685	0.649	0.64	0.653	0.632	0.141	0.152	0.394	0.115	0.369	0.116	0.385	0.563	0.143	0.51	0.166	0.496	0.166	0.156	0.372	0.38	0.346	0.368	0.349	0.678	0.645	0.657	0.648	0.633
	19:15:09	27.6	0.113	0.156	0.162	0.152	0.152	0.153	0.16	0.152	0.162	0.152	0.144	0.166	0.157	0.376	0.375	0.365	0.35	0.35	0.682	0.647	0.638	0.651	0.63	0.142	0.153	0.393	0.115	0.367	0.116	0.378	0.562	0.142	0.511	0.159	0.495	0.166	0.156	0.37	0.382	0.346	0.367	0.349	0.677	0.645	0.657	0.647	0.626
	19:20:09	27.6	0.113	0.155	0.163	0.152	0.153	0.153	0.16	0.153	0.163	0.153	0.144	0.166	0.157	0.376	0.376	0.362	0.349	0.348	0.685	0.645	0.643	0.655	0.634	0.142	0.153	0.394	0.115	0.369	0.117	0.383	0.563	0.142	0.513	0.159	0.497	0.167	0.156	0.365	0.375	0.343	0.363	0.347	0.68	0.646	0.659	0.649	0.628
	19:25:09	27.6	0.113	0.155	0.163	0.153	0.154	0.154	0.161	0.153	0.163	0.154	0.145	0.167	0.158	0.375	0.377	0.363	0.349	0.348	0.682	0.642	0.639	0.653	0.624	0.142	0.154	0.394	0.115	0.369	0.117	0.379	0.56	0.142	0.511	0.16	0.497	0.164	0.157	0.369	0.38	0.344	0.366	0.349	0.68	0.644	0.658	0.647	0.627
	19:30:09	27.6	0.113	0.156	0.164	0.153	0.154	0.154	0.162	0.154	0.163	0.155	0.145	0.167	0.158	0.375	0.379	0.367	0.354	0.355	0.686	0.645	0.642	0.657	0.628	0.143	0.154	0.399	0.115	0.374	0.116	0.387	0.561	0.134	0.51	0.16	0.5	0.165	0.157	0.372	0.385	0.35	0.369	0.35	0.682	0.646	0.66	0.65	0.629
	19:35:09	27.6	0.113	0.155	0.164	0.154	0.154	0.154	0.162	0.153	0.164	0.156	0.146	0.168	0.158	0.375	0.38	0.365	0.351	0.35	0.687	0.644	0.644	0.658	0.629	0.143	0.155	0.397	0.115	0.372	0.117	0.381	0.561	0.134	0.505	0.16	0.497	0.165	0.158	0.368	0.382	0.343	0.366	0.347	0.683	0.645	0.66	0.65	0.629
	19:40:09	27.6	0.113	0.155	0.159	0.154	0.155	0.153	0.163	0.152	0.164	0.156	0.146	0.168	0.158	0.374	0.382	0.363	0.351	0.349	0.687	0.644	0.645	0.659	0.63	0.144	0.154	0.398	0.116	0.373	0.118	0.385	0.56	0.135	0.506	0.159	0.498	0.165	0.158	0.369	0.381	0.342	0.367	0.347	0.684	0.645	0.659	0.651	0.63
	19:45:09	27.6	0.113	0.155	0.159	0.152	0.155	0.154	0.163	0.152	0.163	0.157	0.146	0.169	0.158	0.373	0.383	0.368	0.352	0.354	0.686	0.643	0.644	0.658	0.629	0.144	0.154	0.399	0.115	0.375	0.118	0.388	0.56	0.135	0.506	0.16	0.498	0.166	0.158	0.373	0.386	0.345	0.369	0.349	0.684	0.645	0.659	0.651	0.63
	19:50:09	27.6	0.113	0.155	0.16	0.153	0.156	0.154	0.164	0.153	0.164	0.158	0.147	0.17	0.158	0.374	0.383	0.372	0.355	0.361	0.687	0.642	0.646	0.659	0.63	0.145	0.154	0.4	0.116	0.376	0.118	0.394	0.561	0.135	0.507	0.16	0.5	0.167	0.158	0.378	0.396	0.353	0.378	0.358	0.686	0.646	0.66	0.651	0.631
	19:55:09	27.6	0.113	0.155	0.16	0.153	0.156	0.155	0.163	0.152	0.165	0.159	0.147	0.17	0.159	0.375	0.384	0.371	0.35	0.357	0.688	0.642	0.647	0.655	0.631	0.146	0.154	0.399	0.116	0.375	0.119	0.388	0.562	0.131	0.506	0.161	0.5	0.167	0.153	0.374	0.39	0.349	0.374	0.354	0.686	0.646	0.66	0.651	0.63
	20:00:09	27.7	0.113	0.155	0.16	0.154	0.157	0.155	0.163	0.152	0.165	0.159	0.148	0.171	0.159	0.376	0.384	0.367	0.347	0.352	0.689	0.643	0.647	0.656	0.631	0.146	0.155	0.399	0.116	0.374	0.118	0.383	0.562	0.129	0.507	0.162	0.496	0.167	0.153	0.37	0.382	0.344	0.369	0.351	0.685	0.647	0.657	0.652	0.631
	20:05:09	27.6	0.113	0.155	0.161	0.154	0.157	0.156	0.164	0.153	0.165	0.16	0.148	0.172	0.159	0.377	0.386	0.366	0.345	0.349	0.685	0.642	0.648	0.655	0.632	0.146	0.155	0.403	0.116	0.377	0.119	0.388	0.562	0.129	0.509	0.162	0.497	0.168	0.153	0.37	0.381	0.342	0.368	0.349	0.686	0.647	0.657	0.653	0.631
	20:10:09	27.6	0.113	0.155	0.16	0.154	0.158	0.147	0.164	0.153	0.165	0.161	0.148	0.138	0.158	0.377	0.385	0.367	0.347	0.351	0.686	0.643	0.648	0.656	0.633	0.147	0.156	0.402	0.116	0.379	0.119	0.382	0.56	0.13	0.509	0.162	0.498	0.168	0.153	0.37	0.382	0.344	0.367	0.348	0.686	0.647	0.657	0.653	0.631
	20:15:09	27.6	0.113	0.155	0.16	0.155	0.158	0.147	0.165	0.153	0.166	0.161	0.149	0.138	0.158	0.376	0.386	0.37	0.35	0.354	0.685	0.642	0.648	0.656	0.633	0.147	0.155	0.404	0.116	0.38	0.119	0.384	0.56	0.13	0.51	0.162	0.498	0.168	0.153	0.375	0.385	0.346	0.369	0.351	0.687	0.648	0.658	0.653	0.632
	20:20:09	27.6	0.113	0.155	0.161	0.155	0.159	0.147	0.165	0.153	0.166	0.162	0.149	0.137	0.158	0.377	0.388	0.372	0.351	0.357	0.686	0.643	0.648	0.655	0.634	0.141	0.155	0.405	0.116	0.379	0.119	0.383	0.561	0.13	0.511	0.162	0.5	0.169	0.154	0.375	0.39	0.35	0.37	0.353	0.686	0.649	0.659	0.654	0.633
	20:25:09	27.6	0.113	0.155	0.161	0.155	0.159	0.147	0.166	0.153	0.167	0.162	0.149	0.137	0.159	0.378	0.389	0.374	0.351	0.356	0.688	0.644	0.648	0.656	0.635	0.139	0.155	0.405	0.116	0.381	0.119	0.382	0.561	0.13	0.511	0.163	0.501	0.169	0.154	0.375	0.387	0.348	0.369	0.353	0.686	0.643	0.658	0.655	0.633
	20:30:09	27.6	0.113	0.155	0.162	0.155	0.159	0.148	0.166	0.154	0.167	0.163	0.15	0.137	0.159	0.38	0.39	0.371	0.344	0.351	0.689	0.645	0.649	0.657	0.637	0.139	0.156	0.405	0.117	0.381	0.12	0.381	0.561	0.131	0.512	0.163	0.503	0.147	0.15	0.37	0.382	0.342	0.364	0.349	0.683	0.643	0.66	0.655	0.632
	20:35:09	27.6	0.113	0.155	0.162	0.156	0.159	0.148	0.167	0.154	0.168	0.164	0.15	0.137	0.159	0.38	0.39	0.37	0.344	0.351	0.69	0.646	0.648	0.657	0.637	0.14	0.156	0.407	0.117	0.383	0.12	0.383	0.561	0.131	0.508	0.163	0.503	0.148	0.147	0.372	0.383	0.339	0.366	0.351	0.681	0.643	0.659	0.653	0.632
	20:40:09	27.7	0.113	0.155	0.163	0.156	0.16	0.149	0.166	0.153	0.168	0.164	0.151	0.137	0.159	0.381	0.39	0.374	0.353	0.359	0.688	0.645	0.649	0.657	0.638	0.14	0.157	0.408	0.117	0.387	0.12	0.389	0.562	0.131	0.509	0.164	0.504	0.148	0.147	0.377	0.391	0.347	0.371	0.354	0.682	0.644	0.66	0.654	0.632
	20:45:09	27.6	0.113	0.155	0.163	0.156	0.16	0.149	0.167	0.154	0.168	0.165	0.151	0.138	0.16	0.383	0.391	0.375	0.351	0.359	0.689	0.646	0.651	0.658	0.639	0.141	0.157	0.406	0.117	0.385	0.12	0.384	0.562	0.132	0.51	0.165	0.506	0.148	0.147	0.376	0.392	0.349	0.37	0.354	0.681	0.644	0.66	0.655	0.633
	20:50:09	27.6	0.113	0.155	0.163	0.157	0.16	0.149	0.167	0.154	0.169	0.166	0.152	0.138	0.152	0.383	0.39	0.379	0.35	0.36	0.687	0.643	0.648	0.656	0.637	0.14	0.157	0.406	0.117	0.384	0.12	0.387	0.56	0.132	0.508	0.165	0.505	0.149	0.145	0.378	0.386	0.348	0.37	0.356	0.681	0.644	0.66	0.654	0.632
	20:55:09	27.6	0.113	0.155	0.163	0.157	0.16	0.149	0.167	0.155	0.17	0.166	0.152	0.138	0.152	0.382	0.392	0.377	0.353	0.362	0.686	0.647	0.645	0.66	0.641	0.141	0.158	0.407	0.117	0.385	0.121	0.393	0.561	0.132	0.509	0.166	0.507	0.149	0.145	0.379	0.388	0.351	0.373	0.357	0.683	0.646	0.662	0.655	0.634
	21:00:09	27.6	0.113	0.155	0.164	0.152	0.16	0.15	0.168	0.155	0.17	0.166	0.152	0.134	0.153	0.381	0.389	0.375	0.346	0.357	0.686	0.645	0.646	0.661	0.641	0.141	0.158	0.407	0.117	0.385	0.122	0.385	0.562	0.133	0.51	0.167	0.508	0.15	0.146	0.376	0.385	0.345	0.368	0.354	0.68	0.646	0.662	0.654	0.632
	21:05:09	27.6	0.113	0.155	0.164	0.152	0.161	0.15	0.168	0.155	0.171	0.167	0.153	0.134	0.153	0.379	0.388	0.375	0.345	0.356	0.687	0.646	0.648	0.654	0.642	0.142	0.159	0.408	0.117	0.386	0.119	0.386	0.562	0.133	0.511	0.167	0.509	0.15	0.146	0.376	0.38	0.343	0.367	0.353	0.68	0.644	0.663	0.655	0.632
	21:10:09	27.6	0.113	0.155	0.165	0.152	0.16	0.151	0.169	0.156	0.171	0.167	0.153	0.135	0.153	0.376	0.389	0.376	0.348	0.36	0.684	0.646	0.649	0.654	0.644	0.142	0.159	0.41	0.118	0.387	0.119	0.391	0.563	0.133	0.512	0.168	0.51	0.15	0.146	0.379	0.384	0.345	0.37	0.355	0.682	0.644	0.662	0.654	0.633
	21:15:09	27.6	0.113	0.155	0.165	0.153	0.16	0.151	0.169	0.156	0.172	0.168	0.153	0.135	0.153	0.377	0.391	0.378	0.349	0.361	0.684	0.647	0.65	0.654	0.644	0.142	0.16	0.412	0.118	0.388	0.119	0.392	0.563	0.133	0.513	0.168	0.512	0.151	0.147	0.381	0.388	0.349	0.372	0.357	0.682	0.644	0.657	0.656	0.634
	21:20:09	27.6	0.113	0.155	0.166	0.153	0.161	0.15	0.169	0.157	0.172	0.167	0.154	0.135	0.153	0.378	0.391	0.377	0.342	0.355	0.683	0.648	0.65	0.656	0.645	0.142	0.16	0.411	0.114	0.387	0.12	0.387	0.564	0.134	0.515	0.169	0.513	0.151	0.147	0.377	0.381	0.344	0.367	0.353	0.682	0.645	0.659	0.657	0.635
	21:25:09	27.6	0.113	0.155	0.166	0.153	0.161	0.15	0.17	0.156	0.173	0.168	0.154	0.135	0.153	0.381	0.393	0.379	0.344	0.358	0.683	0.647	0.651	0.657	0.646	0.143	0.16	0.413	0.115	0.39	0.12	0.393	0.563	0.134	0.514	0.17	0.513	0.152	0.146	0.379	0.385	0.347	0.372	0.356	0.683	0.646	0.66	0.659	0.635
	21:30:09	27.6	0.113	0.155	0.166	0.154	0.155	0.15	0.17	0.156	0.173	0.168	0.155	0.135	0.153	0.382	0.389	0.382	0.349	0.362	0.684	0.647	0.652	0.655	0.647	0.144	0.161	0.414	0.115	0.392	0.12	0.388	0.564	0.134	0.515	0.17	0.515	0.152	0.147	0.382	0.386	0.349	0.373	0.356	0.684	0.646	0.66	0.659	0.635
	21:35:09	27.6	0.113	0.155	0.167	0.154	0.155	0.151	0.155	0.156	0.173	0.168	0.152	0.136	0.153	0.383	0.388	0.383	0.347	0.362	0.684	0.648	0.652	0.655	0.647	0.144	0.161	0.411	0.115	0.392	0.12	0.388	0.564	0.135	0.516	0.168	0.515	0.153	0.147	0.38	0.388	0.348	0.374	0.357	0.684	0.647	0.661	0.66	0.633
	21:40:09	27.6	0.113	0.155	0.154	0.154	0.155	0.151	0.155	0.157	0.174	0.169	0.139	0.136	0.154	0.381	0.388	0.384	0.348	0.363	0.681	0.649	0.653	0.652	0.648	0.144	0.162	0.412	0.116	0.393	0.119	0.392	0.563	0.135	0.517	0.168	0.516	0.153	0.147	0.382	0.387	0.348	0.373	0.357	0.685	0.648	0.662	0.661	0.632
	21:45:09	27.6	0.113	0.155	0.154	0.155	0.156	0.152	0.154	0.156	0.174	0.169	0.14	0.136	0.151	0.381	0.387	0.382	0.346	0.361	0.683	0.65	0.655	0.653	0.651	0.145	0.162	0.412	0.115	0.391	0.119	0.392	0.564	0.135	0.519	0.168	0.518	0.153	0.148	0.378	0.383	0.345	0.369	0.356	0.686	0.648	0.663	0.661	0.633
	21:50:09	27.6	0.113	0.155	0.155	0.155	0.156	0.152	0.155	0.156	0.175	0.164	0.139	0.136	0.151	0.382	0.389	0.382	0.345	0.36	0.683	0.649	0.655	0.653	0.651	0.145	0.163	0.411	0.116	0.391	0.119	0.388	0.564	0.135	0.519	0.169	0.518	0.154	0.148	0.38	0.386	0.346	0.373	0.358	0.686	0.649	0.664	0.662	0.634
	21:55:09	27.6	0.113	0.155	0.155	0.155	0.157	0.153	0.155	0.157	0.175	0.164	0.139	0.136	0.151	0.382	0.389	0.382	0.346	0.358	0.683	0.65	0.656	0.654	0.652	0.146	0.163	0.412	0.116	0.392	0.119	0.392	0.565	0.135	0.521	0.169	0.518	0.154	0.148	0.379	0.386	0.345	0.37	0.352	0.687	0.649	0.664	0.662	0.633
	22:00:09	27.6	0.113	0.155	0.155	0.152	0.157	0.153	0.155	0.157	0.176	0.164	0.139	0.137	0.151	0.381	0.39	0.386	0.348	0.362	0.683	0.65	0.657	0.654	0.652	0.146	0.163	0.413	0.115	0.394	0.119	0.393	0.566	0.135	0.521	0.169	0.519	0.154	0.149	0.381	0.39	0.348	0.373	0.344	0.687	0.65	0.663	0.662	0.633
	22:05:09	27.6	0.113	0.155	0.15	0.153	0.157	0.153	0.156	0.158	0.176	0.164	0.14	0.137	0.152	0.381	0.39	0.386	0.348	0.36	0.684	0.651	0.658	0.654	0.652	0.147	0.164	0.412	0.116	0.394	0.12	0.393	0.566	0.135	0.522	0.17	0.52	0.155	0.14	0.381	0.393	0.35	0.376	0.346	0.688	0.651	0.665	0.663	0.634
	22:10:09	27.6	0.113	0.155	0.151	0.153	0.158	0.153	0.156	0.158	0.177	0.165	0.14	0.137	0.152	0.382	0.391	0.387	0.348	0.359	0.685	0.651	0.659	0.655	0.654	0.148	0.164	0.413	0.116	0.394	0.12	0.39	0.567	0.136	0.524	0.17	0.52	0.155	0.141	0.38	0.389	0.347	0.372	0.343	0.685	0.653	0.666	0.662	0.634
	22:15:09	27.6	0.113	0.155	0.151	0.153	0.158	0.153	0.156	0.158	0.177	0.165	0.139	0.137	0.146	0.383	0.391	0.387	0.345	0.356	0.682	0.651	0.66	0.657	0.655	0.148	0.165	0.414	0.115	0.396	0.12	0.393	0.567	0.136	0.525	0.171	0.521	0.145	0.141	0.38	0.388	0.346	0.373	0.343	0.686	0.653	0.666	0.663	0.635
	22:20:09	27.6	0.113	0.155	0.151	0.154	0.159	0.153	0.157	0.159	0.178	0.166	0.135	0.137	0.146	0.381	0.392	0.387	0.346	0.356	0.682	0.65	0.658	0.658	0.656	0.148	0.159	0.415	0.116	0.396	0.12	0.39	0.568	0.136	0.525	0.171	0.521	0.146	0.141	0.379	0.388	0.348	0.373	0.343	0.686	0.654	0.667	0.662	0.636
	22:25:09	27.6	0.113	0.155	0.152	0.154	0.159	0.141	0.157	0.159	0.178	0.166	0.136	0.137	0.147	0.381	0.391	0.389	0.345	0.357	0.684	0.652	0.657	0.659	0.656	0.149	0.159	0.414	0.116	0.398	0.12	0.395	0.569	0.136	0.527	0.171	0.523	0.147	0.141	0.38	0.387	0.348	0.373	0.343	0.687	0.654	0.668	0.664	0.637
	22:30:09	27.6	0.113	0.155	0.152	0.155	0.159	0.141	0.157	0.16	0.178	0.166	0.136	0.137	0.147	0.378	0.392	0.388	0.347	0.359	0.683	0.652	0.658	0.659	0.656	0.149	0.159	0.414	0.115	0.399	0.119	0.392	0.569	0.136	0.528	0.172	0.524	0.147	0.141	0.381	0.389	0.347	0.372	0.344	0.687	0.653	0.668	0.664	0.637
	22:35:09	27.6	0.113	0.155	0.141	0.155	0.16	0.141	0.157	0.16	0.178	0.167	0.136	0.138	0.139	0.379	0.393	0.388	0.345	0.357	0.684	0.653	0.659	0.66	0.653	0.15	0.16	0.417	0.116	0.401	0.12	0.393	0.568	0.137	0.529	0.172	0.525	0.148	0.141	0.38	0.389	0.349	0.372	0.344	0.688	0.654	0.668	0.665	0.638
	22:40:09	27.6	0.113	0.155	0.141	0.155	0.161	0.141	0.158	0.161	0.178	0.167	0.137	0.138	0.139	0.379	0.391	0.39	0.347	0.359	0.684	0.653	0.659	0.661	0.652	0.149	0.16	0.418	0.116	0.401	0.12	0.394	0.569	0.137	0.53	0.173	0.525	0.147	0.142	0.382	0.389	0.35	0.375	0.345	0.688	0.656	0.669	0.665	0.638
	22:45:09	27.6	0.113	0.155	0.14	0.155	0.161	0.142	0.158	0.161	0.179	0.167	0.137	0.138	0.139	0.377	0.393	0.39	0.349	0.361	0.686	0.653	0.66	0.662	0.652	0.15	0.16	0.416	0.116	0.402	0.12	0.396	0.569	0.137	0.531	0.173	0.526	0.147	0.142	0.384	0.393	0.358	0.375	0.348	0.689	0.656	0.669	0.665	0.639
	22:50:09	27.6	0.113	0.155	0.14	0.156	0.162	0.142	0.159	0.144	0.179	0.168	0.138	0.138	0.139	0.378	0.395	0.391	0.348	0.362	0.686	0.654	0.66	0.659	0.652	0.15	0.147	0.418	0.116	0.4	0.12	0.395	0.569	0.138	0.531	0.174	0.526	0.147	0.141	0.384	0.392	0.355	0.374	0.349	0.689	0.656	0.669	0.665	0.639
	22:55:09	27.6	0.113	0.155	0.141	0.156	0.161	0.143	0.159	0.145	0.18	0.168	0.138	0.139	0.14	0.38	0.393	0.392	0.349	0.362	0.684	0.654	0.66	0.659	0.653	0.151	0.148	0.417	0.116	0.4	0.12	0.401	0.57	0.138	0.531	0.171	0.527	0.148	0.141	0.384	0.392	0.353	0.374	0.348	0.691	0.657	0.67	0.666	0.64
	23:00:09	27.6	0.113	0.155	0.141	0.156	0.161	0.143	0.159	0.145	0.18	0.169	0.138	0.139	0.138	0.382	0.391	0.39	0.346	0.359	0.685	0.654	0.662	0.661	0.654	0.151	0.147	0.415	0.116	0.402	0.12	0.397	0.571	0.138	0.533	0.172	0.529	0.148	0.141	0.383	0.39	0.352	0.372	0.347	0.691	0.656	0.672	0.668	0.641
	23:05:09	27.6	0.113	0.155	0.141	0.157	0.161	0.143	0.159	0.146	0.181	0.169	0.139	0.139	0.138	0.38	0.393	0.39	0.349	0.362	0.686	0.655	0.663	0.661	0.655	0.152	0.147	0.415	0.116	0.402	0.12	0.4	0.571	0.139	0.534	0.172	0.53	0.148	0.142	0.385	0.393	0.355	0.376	0.35	0.692	0.657	0.672	0.669	0.642
	23:10:09	27.6	0.113	0.155	0.142	0.157	0.162	0.144	0.16	0.145	0.182	0.17	0.139	0.139	0.139	0.38	0.395	0.392	0.353	0.364	0.687	0.654	0.662	0.661	0.653	0.153	0.147	0.416	0.117	0.403	0.12	0.395	0.572	0.139	0.534	0.173	0.53	0.148	0.142	0.389	0.395	0.358	0.38	0.354	0.693	0.658	0.671	0.669	0.642
	23:15:09	27.6	0.113	0.155	0.142	0.155	0.162	0.144	0.16	0.145	0.182	0.164	0.139	0.133	0.139	0.381	0.396	0.394	0.353	0.363	0.687	0.653	0.664	0.662	0.654	0.153	0.148	0.417	0.117	0.404	0.12	0.397	0.573	0.139	0.535	0.173	0.532	0.149	0.142	0.386	0.394	0.357	0.376	0.352	0.687	0.659	0.672	0.669	0.643
	23:20:09	27.6	0.113	0.155	0.142	0.156	0.163	0.144	0.16	0.146	0.182	0.165	0.14	0.133	0.139	0.381	0.396	0.393	0.347	0.352	0.688	0.652	0.665	0.664	0.655	0.153	0.148	0.413	0.118	0.404	0.12	0.389	0.573	0.139	0.536	0.171	0.532	0.149	0.142	0.377	0.382	0.348	0.368	0.345	0.687	0.66	0.674	0.667	0.644
	23:25:09	27.6	0.113	0.155	0.143	0.156	0.159	0.145	0.161	0.147	0.183	0.165	0.14	0.133	0.14	0.38	0.398	0.394	0.353	0.357	0.689	0.653	0.663	0.664	0.654	0.152	0.148	0.412	0.118	0.406	0.12	0.398	0.573	0.14	0.536	0.171	0.533	0.149	0.143	0.385	0.387	0.35	0.369	0.347	0.688	0.66	0.674	0.666	0.642
	23:30:09	27.6	0.113	0.155	0.143	0.157	0.159	0.145	0.161	0.147	0.184	0.166	0.141	0.133	0.14	0.379	0.397	0.395	0.355	0.36	0.689	0.653	0.664	0.663	0.655	0.151	0.143	0.413	0.118	0.406	0.12	0.396	0.574	0.14	0.537	0.172	0.534	0.15	0.143	0.388	0.39	0.355	0.371	0.35	0.688	0.661	0.675	0.666	0.643
	23:35:09	27.6	0.113	0.155	0.143	0.157	0.16	0.146	0.16	0.147	0.184	0.166	0.142	0.133	0.141	0.381	0.398	0.397	0.355	0.359	0.69	0.652	0.665	0.665	0.646	0.152	0.143	0.412	0.118	0.405	0.12	0.397	0.574	0.14	0.538	0.152	0.535	0.15	0.143	0.385	0.391	0.354	0.37	0.348	0.687	0.661	0.675	0.666	0.643
	23:40:09	27.6	0.113	0.155	0.143	0.158	0.16	0.146	0.159	0.148	0.185	0.166	0.142	0.132	0.14	0.382	0.399	0.398	0.355	0.362	0.691	0.653	0.666	0.666	0.647	0.152	0.132	0.412	0.118	0.407	0.12	0.395	0.575	0.141	0.54	0.153	0.536	0.149	0.143	0.387	0.394	0.354	0.374	0.351	0.685	0.661	0.676	0.666	0.644
	23:45:09	27.6	0.113	0.155	0.143	0.158	0.161	0.146	0.16	0.148	0.185	0.166	0.142	0.132	0.14	0.383	0.397	0.398	0.356	0.361	0.69	0.653	0.666	0.662	0.647	0.153	0.132	0.414	0.119	0.407	0.12	0.403	0.576	0.141	0.54	0.153	0.536	0.149	0.144	0.386	0.396	0.357	0.371	0.351	0.685	0.662	0.676	0.667	0.644
	23:50:09	27.6	0.113	0.155	0.144	0.159	0.161	0.147	0.16	0.149	0.185	0.166	0.142	0.132	0.141	0.381	0.399	0.396	0.357	0.362	0.691	0.654	0.667	0.662	0.648	0.153	0.132	0.411	0.118	0.407	0.12	0.398	0.576	0.141	0.541	0.153	0.536	0.15	0.144	0.387	0.397	0.359	0.371	0.35	0.686	0.663	0.677	0.668	0.645
	23:55:09	27.6	0.113	0.155	0.144	0.159	0.157	0.147	0.161	0.149	0.185	0.166	0.142	0.133	0.141	0.382	0.398	0.395	0.354	0.359	0.69	0.654	0.668	0.663	0.645	0.154	0.132	0.414	0.119	0.407	0.121	0.396	0.577	0.142	0.541	0.153	0.538	0.151	0.144	0.385	0.393	0.355	0.368	0.348	0.686	0.664	0.678	0.668	0.645
	1 day, 0:00:09	27.6	0.113	0.155	0.144	0.159	0.157	0.148	0.161	0.149	0.186	0.167	0.143	0.133	0.141	0.383	0.398	0.399	0.354	0.359	0.691	0.654	0.669	0.663	0.646	0.154	0.132	0.414	0.119	0.407	0.121	0.401	0.578	0.142	0.541	0.153	0.535	0.15	0.144	0.387	0.394	0.357	0.369	0.349	0.687	0.664	0.679	0.669	0.646
	1 day, 0:05:09	27.6	0.113	0.155	0.145	0.16	0.157	0.148	0.161	0.15	0.186	0.167	0.143	0.134	0.141	0.385	0.399	0.398	0.352	0.357	0.692	0.655	0.67	0.663	0.647	0.155	0.132	0.413	0.119	0.409	0.121	0.401	0.578	0.142	0.542	0.154	0.537	0.15	0.145	0.385	0.39	0.354	0.367	0.347	0.688	0.665	0.68	0.67	0.647
	1 day, 0:10:09	27.6	0.113	0.154	0.145	0.16	0.157	0.148	0.162	0.15	0.187	0.168	0.143	0.134	0.141	0.387	0.401	0.398	0.355	0.358	0.693	0.652	0.67	0.663	0.647	0.155	0.132	0.412	0.12	0.409	0.122	0.401	0.578	0.143	0.542	0.154	0.537	0.151	0.145	0.388	0.391	0.355	0.369	0.348	0.688	0.666	0.68	0.67	0.648
	1 day, 0:15:09	27.6	0.113	0.154	0.145	0.161	0.158	0.149	0.162	0.15	0.187	0.168	0.144	0.134	0.142	0.386	0.402	0.399	0.361	0.364	0.694	0.652	0.672	0.664	0.648	0.156	0.132	0.411	0.12	0.409	0.121	0.404	0.576	0.143	0.543	0.155	0.537	0.151	0.146	0.391	0.399	0.362	0.373	0.353	0.689	0.667	0.68	0.671	0.648
	1 day, 0:20:09	27.6	0.113	0.154	0.145	0.162	0.158	0.149	0.162	0.15	0.188	0.168	0.144	0.134	0.142	0.385	0.403	0.402	0.359	0.364	0.694	0.652	0.672	0.664	0.648	0.156	0.132	0.41	0.12	0.41	0.123	0.401	0.577	0.143	0.543	0.155	0.539	0.152	0.146	0.389	0.395	0.358	0.371	0.351	0.689	0.667	0.68	0.671	0.649
	1 day, 0:25:09	27.6	0.113	0.154	0.146	0.162	0.158	0.149	0.162	0.151	0.188	0.169	0.145	0.134	0.142	0.387	0.403	0.399	0.357	0.361	0.695	0.653	0.673	0.665	0.648	0.157	0.133	0.408	0.12	0.408	0.124	0.4	0.578	0.143	0.544	0.155	0.54	0.152	0.146	0.388	0.391	0.358	0.37	0.35	0.69	0.667	0.681	0.672	0.649
	1 day, 0:30:09	27.6	0.113	0.154	0.146	0.162	0.158	0.15	0.162	0.141	0.189	0.169	0.145	0.135	0.142	0.386	0.402	0.398	0.358	0.362	0.696	0.654	0.674	0.665	0.649	0.157	0.133	0.408	0.12	0.408	0.123	0.405	0.578	0.143	0.545	0.156	0.54	0.152	0.146	0.39	0.396	0.361	0.374	0.351	0.688	0.667	0.682	0.672	0.65
	1 day, 0:35:09	27.6	0.113	0.154	0.145	0.162	0.158	0.15	0.163	0.141	0.189	0.17	0.145	0.135	0.143	0.385	0.4	0.399	0.358	0.362	0.697	0.655	0.675	0.667	0.649	0.158	0.133	0.408	0.12	0.408	0.122	0.402	0.579	0.144	0.546	0.139	0.541	0.15	0.146	0.388	0.396	0.364	0.373	0.352	0.684	0.668	0.683	0.67	0.651
	1 day, 0:40:09	27.6	0.113	0.154	0.145	0.157	0.159	0.15	0.163	0.14	0.19	0.17	0.146	0.124	0.143	0.384	0.4	0.4	0.354	0.359	0.697	0.654	0.676	0.667	0.649	0.158	0.133	0.408	0.12	0.406	0.122	0.398	0.578	0.144	0.546	0.14	0.543	0.15	0.147	0.385	0.393	0.36	0.37	0.35	0.685	0.668	0.683	0.67	0.651
	1 day, 0:45:09	27.6	0.113	0.154	0.146	0.158	0.159	0.151	0.163	0.141	0.19	0.171	0.146	0.124	0.143	0.386	0.402	0.401	0.356	0.361	0.697	0.654	0.677	0.667	0.65	0.159	0.133	0.409	0.121	0.408	0.123	0.398	0.579	0.144	0.548	0.141	0.541	0.15	0.147	0.389	0.395	0.362	0.374	0.351	0.685	0.669	0.683	0.67	0.652
	1 day, 0:50:09	27.6	0.113	0.154	0.146	0.157	0.15	0.151	0.159	0.141	0.188	0.171	0.147	0.124	0.144	0.389	0.403	0.399	0.356	0.36	0.697	0.655	0.677	0.668	0.651	0.159	0.134	0.41	0.12	0.408	0.122	0.399	0.58	0.145	0.549	0.141	0.542	0.151	0.147	0.391	0.395	0.362	0.373	0.352	0.686	0.669	0.685	0.671	0.653
	1 day, 0:55:09	27.6	0.113	0.154	0.146	0.158	0.15	0.151	0.159	0.141	0.189	0.171	0.147	0.124	0.144	0.388	0.406	0.401	0.356	0.361	0.698	0.656	0.677	0.669	0.652	0.16	0.134	0.412	0.121	0.409	0.123	0.399	0.58	0.145	0.549	0.142	0.543	0.151	0.148	0.388	0.392	0.358	0.371	0.35	0.686	0.669	0.686	0.671	0.653
	1 day, 1:00:09	27.7	0.113	0.154	0.146	0.158	0.15	0.145	0.159	0.141	0.189	0.172	0.147	0.124	0.144	0.388	0.406	0.4	0.355	0.359	0.698	0.656	0.679	0.67	0.653	0.16	0.134	0.413	0.121	0.41	0.123	0.402	0.581	0.145	0.55	0.142	0.544	0.151	0.148	0.389	0.392	0.357	0.372	0.35	0.686	0.67	0.686	0.669	0.653
[truncated: 49 more columns]

## Sheet: KB_med_con
Time	T° 600	C8	C10	E7	E9	E11	G8	G10	Average	SE
00:00:09	27.1	0.112	0.116	0.113	0.121	0.118	0.12	0.117	0.116714	0.00126706
00:05:09	27.2	0.112	0.116	0.113	0.121	0.118	0.12	0.117	0.116714	0.00126706
00:10:09	27.2	0.112	0.116	0.113	0.121	0.118	0.12	0.118	0.116857	0.00128041
00:15:09	27.3	0.112	0.116	0.113	0.121	0.118	0.12	0.117	0.116714	0.00126706
00:20:09	27.3	0.112	0.116	0.113	0.121	0.118	0.119	0.118	0.116714	0.0012289
00:25:09	27.3	0.112	0.116	0.113	0.121	0.118	0.119	0.118	0.116714	0.0012289
00:30:09	27.3	0.112	0.116	0.113	0.121	0.118	0.12	0.117	0.116714	0.00126706
00:35:09	27.4	0.112	0.115	0.113	0.121	0.118	0.12	0.117	0.116571	0.00128836
00:40:09	27.4	0.112	0.116	0.113	0.121	0.117	0.12	0.117	0.116571	0.00125085
00:45:09	27.4	0.112	0.115	0.113	0.121	0.117	0.119	0.117	0.116286	0.00120937
00:50:09	27.5	0.112	0.115	0.113	0.121	0.117	0.12	0.118	0.116571	0.00128836
00:55:09	27.5	0.112	0.115	0.113	0.121	0.118	0.12	0.117	0.116571	0.00128836
01:00:09	27.5	0.112	0.115	0.113	0.121	0.118	0.12	0.118	0.116714	0.0013041
01:05:09	27.5	0.112	0.116	0.113	0.121	0.119	0.12	0.119	0.117143	0.00133503
01:10:09	27.5	0.113	0.116	0.113	0.121	0.12	0.121	0.12	0.117714	0.00137519
01:15:09	27.5	0.114	0.117	0.115	0.122	0.122	0.122	0.121	0.119	0.00134519
01:20:09	27.5	0.115	0.118	0.116	0.123	0.123	0.123	0.122	0.12	0.00134519
01:25:09	27.5	0.117	0.12	0.117	0.124	0.124	0.125	0.124	0.121571	0.0013248
01:30:09	27.5	0.118	0.121	0.118	0.126	0.125	0.126	0.125	0.122714	0.00137519
01:35:09	27.5	0.119	0.122	0.12	0.127	0.127	0.127	0.126	0.124	0.00134519
01:40:09	27.5	0.12	0.123	0.121	0.128	0.128	0.128	0.127	0.125	0.00134519
01:45:09	27.5	0.121	0.125	0.122	0.129	0.13	0.129	0.128	0.126286	0.00137519
01:50:09	27.5	0.123	0.126	0.123	0.131	0.131	0.13	0.13	0.127714	0.00137519
01:55:09	27.5	0.124	0.128	0.125	0.132	0.132	0.132	0.131	0.129143	0.00131708
02:00:09	27.5	0.125	0.129	0.126	0.133	0.133	0.133	0.132	0.130143	0.00131708
02:05:09	27.5	0.126	0.13	0.126	0.135	0.135	0.134	0.133	0.131286	0.00150735
02:10:09	27.5	0.128	0.132	0.128	0.136	0.136	0.135	0.135	0.132857	0.00135275
02:15:09	27.5	0.129	0.133	0.129	0.137	0.137	0.137	0.136	0.134	0.00139728
02:20:09	27.5	0.13	0.134	0.13	0.138	0.139	0.138	0.137	0.135143	0.00145453
02:25:09	27.5	0.131	0.135	0.131	0.139	0.14	0.139	0.138	0.136143	0.00145453
02:30:09	27.5	0.132	0.136	0.132	0.14	0.141	0.14	0.139	0.137143	0.00145453
02:35:09	27.5	0.133	0.138	0.133	0.142	0.142	0.141	0.141	0.138571	0.0015253
02:40:09	27.5	0.134	0.139	0.134	0.143	0.143	0.142	0.142	0.139571	0.0015253
02:45:09	27.5	0.135	0.14	0.135	0.144	0.144	0.144	0.143	0.140714	0.00156926
02:50:09	27.5	0.136	0.141	0.136	0.145	0.146	0.145	0.144	0.141857	0.00162464
02:55:09	27.5	0.137	0.143	0.137	0.147	0.147	0.146	0.145	0.143143	0.00166803
03:00:09	27.5	0.138	0.144	0.138	0.148	0.148	0.147	0.147	0.144286	0.00170034
03:05:09	27.5	0.139	0.145	0.139	0.149	0.149	0.148	0.148	0.145286	0.00170034
03:10:09	27.5	0.141	0.147	0.14	0.15	0.15	0.149	0.149	0.146571	0.00161624
03:15:09	27.5	0.142	0.148	0.141	0.151	0.151	0.15	0.15	0.147571	0.00161624
03:20:09	27.6	0.143	0.149	0.142	0.153	0.152	0.152	0.152	0.149	0.00174574
03:25:09	27.6	0.144	0.15	0.143	0.154	0.153	0.152	0.153	0.149857	0.00171031
03:30:09	27.6	0.145	0.152	0.144	0.155	0.154	0.154	0.155	0.151286	0.00179569
03:35:09	27.6	0.146	0.153	0.145	0.157	0.156	0.155	0.156	0.152571	0.00188802
03:40:09	27.6	0.148	0.155	0.146	0.158	0.158	0.155	0.158	0.154	0.00188982
03:45:09	27.6	0.149	0.156	0.147	0.159	0.159	0.156	0.159	0.155	0.00188982
03:50:09	27.6	0.15	0.157	0.148	0.16	0.16	0.157	0.16	0.156	0.00188982
03:55:09	27.6	0.152	0.158	0.149	0.161	0.161	0.158	0.162	0.157286	0.00187355
04:00:09	27.6	0.153	0.16	0.149	0.163	0.163	0.16	0.163	0.158714	0.00210118
04:05:09	27.6	0.154	0.161	0.15	0.164	0.164	0.161	0.165	0.159857	0.00215394
04:10:09	27.6	0.155	0.162	0.151	0.165	0.165	0.162	0.166	0.160857	0.00215394
04:15:09	27.6	0.155	0.163	0.152	0.166	0.167	0.164	0.167	0.162	0.00228869
04:20:09	27.6	0.157	0.164	0.153	0.167	0.168	0.165	0.169	0.163286	0.00227527
04:25:09	27.6	0.158	0.164	0.154	0.169	0.169	0.166	0.169	0.164143	0.00226178
04:30:09	27.6	0.159	0.166	0.155	0.17	0.171	0.167	0.171	0.165571	0.00236902
04:35:09	27.6	0.16	0.167	0.157	0.172	0.173	0.168	0.172	0.167	0.00237045
04:40:09	27.6	0.161	0.168	0.158	0.173	0.174	0.169	0.173	0.168	0.00237045
04:45:09	27.6	0.163	0.169	0.158	0.174	0.175	0.17	0.174	0.169	0.0024103
04:50:09	27.6	0.163	0.169	0.159	0.176	0.176	0.172	0.175	0.17	0.00254484
04:55:09	27.6	0.164	0.169	0.16	0.177	0.178	0.172	0.177	0.171	0.00265474
05:00:09	27.6	0.166	0.171	0.159	0.179	0.179	0.174	0.178	0.172286	0.00285952
05:05:09	27.6	0.167	0.172	0.16	0.177	0.181	0.171	0.177	0.172143	0.00267643
05:10:09	27.6	0.168	0.173	0.161	0.177	0.181	0.172	0.177	0.172714	0.00251391
05:15:09	27.6	0.169	0.172	0.162	0.179	0.18	0.173	0.176	0.173	0.00235028		The small change in OD is due to small amounts of condensation and evaporation
05:20:09	27.6	0.171	0.172	0.162	0.179	0.181	0.175	0.175	0.173571	0.00234883
05:25:09	27.6	0.172	0.173	0.162	0.181	0.182	0.176	0.175	0.174429	0.00251526
05:30:09	27.6	0.173	0.174	0.164	0.182	0.183	0.178	0.176	0.175714	0.00241734
05:35:09	27.6	0.175	0.175	0.163	0.183	0.182	0.177	0.176	0.175857	0.00247298
05:40:09	27.6	0.174	0.177	0.162	0.184	0.182	0.178	0.178	0.176429	0.00270676
05:45:09	27.6	0.175	0.179	0.162	0.185	0.184	0.18	0.179	0.177714	0.00290905
05:50:09	27.6	0.175	0.18	0.163	0.184	0.185	0.179	0.18	0.178	0.00279455
05:55:09	27.6	0.176	0.18	0.163	0.181	0.185	0.179	0.182	0.178	0.00270801
06:00:09	27.6	0.175	0.181	0.164	0.182	0.186	0.18	0.183	0.178714	0.0027578
06:05:09	27.6	0.176	0.181	0.166	0.183	0.186	0.181	0.178	0.178714	0.00244671
06:10:09	27.6	0.176	0.181	0.167	0.183	0.185	0.181	0.18	0.179	0.00225726
06:15:09	27.6	0.176	0.182	0.168	0.183	0.183	0.183	0.18	0.179286	0.00211248
06:20:09	27.6	0.177	0.183	0.169	0.182	0.182	0.184	0.182	0.179857	0.00199319
06:25:09	27.6	0.178	0.183	0.17	0.183	0.184	0.185	0.183	0.180857	0.00199319
06:30:08	27.6	0.179	0.184	0.172	0.185	0.183	0.183	0.185	0.181571	0.00177089
06:35:09	27.6	0.178	0.185	0.172	0.184	0.184	0.184	0.186	0.181857	0.00190774
06:40:09	27.6	0.176	0.187	0.17	0.183	0.184	0.182	0.187	0.181286	0.00234738
06:45:09	27.6	0.178	0.188	0.171	0.18	0.185	0.182	0.188	0.181714	0.00229611
06:50:09	27.6	0.178	0.189	0.173	0.181	0.187	0.182	0.189	0.182714	0.00227527
06:55:09	27.6	0.18	0.19	0.174	0.183	0.186	0.178	0.19	0.183	0.00229907
07:00:09	27.6	0.18	0.191	0.17	0.183	0.188	0.178	0.191	0.183	0.00291139
07:05:09	27.6	0.181	0.193	0.171	0.18	0.189	0.178	0.192	0.183429	0.00307724
07:10:09	27.6	0.183	0.194	0.172	0.179	0.184	0.178	0.193	0.183286	0.00302147
07:15:09	27.6	0.179	0.195	0.171	0.177	0.181	0.179	0.193	0.182143	0.00329089
07:20:09	27.6	0.179	0.197	0.172	0.179	0.181	0.181	0.189	0.182571	0.00305394
07:25:09	27.6	0.18	0.196	0.171	0.18	0.183	0.181	0.189	0.182857	0.00297152
07:30:09	27.6	0.182	0.196	0.171	0.18	0.18	0.182	0.187	0.182571	0.00287731
07:35:09	27.6	0.181	0.196	0.172	0.181	0.181	0.184	0.187	0.183143	0.00275533
07:40:09	27.6	0.182	0.197	0.172	0.182	0.181	0.185	0.189	0.184	0.00291139
07:45:09	27.6	0.183	0.198	0.173	0.181	0.182	0.186	0.187	0.184286	0.00285952
07:50:09	27.6	0.184	0.197	0.174	0.183	0.18	0.187	0.187	0.184571	0.00268024
07:55:09	27.6	0.182	0.198	0.174	0.184	0.181	0.188	0.187	0.184857	0.0027982
08:00:09	27.6	0.182	0.19	0.173	0.185	0.182	0.189	0.185	0.183714	0.00213491
08:05:09	27.6	0.183	0.191	0.174	0.186	0.183	0.19	0.184	0.184429	0.00212533
08:10:09	27.6	0.183	0.192	0.174	0.187	0.183	0.191	0.186	0.185143	0.00228274
08:15:09	27.6	0.183	0.191	0.175	0.188	0.184	0.191	0.186	0.185429	0.0021028
08:20:09	27.6	0.182	0.192	0.176	0.187	0.185	0.192	0.188	0.186	0.0021492
08:25:09	27.6	0.183	0.193	0.177	0.187	0.186	0.186	0.188	0.185714	0.00184796
08:30:09	27.6	0.184	0.187	0.178	0.188	0.185	0.188	0.189	0.185571	0.00142857
08:35:09	27.6	0.185	0.183	0.178	0.188	0.186	0.189	0.181	0.184286	0.00147542
08:40:09	27.7	0.186	0.184	0.179	0.189	0.186	0.19	0.182	0.185143	0.00145453
08:45:09	27.7	0.184	0.185	0.177	0.188	0.186	0.191	0.183	0.184857	0.00165369
08:50:09	27.7	0.185	0.181	0.178	0.189	0.187	0.191	0.184	0.185	0.00170434
08:55:09	27.7	0.186	0.18	0.175	0.189	0.188	0.192	0.183	0.184714	0.0022008
09:00:09	27.7	0.187	0.172	0.176	0.188	0.184	0.194	0.184	0.183571	0.00281033
09:05:09	27.7	0.182	0.173	0.175	0.189	0.181	0.194	0.185	0.182714	0.00280063
09:10:09	27.7	0.183	0.174	0.176	0.189	0.182	0.195	0.186	0.183571	0.00275039
09:15:09	27.7	0.184	0.174	0.177	0.187	0.183	0.196	0.187	0.184	0.00272554
09:20:09	27.7	0.182	0.176	0.177	0.188	0.183	0.197	0.188	0.184429	0.00275039
09:25:09	27.7	0.183	0.176	0.178	0.18	0.184	0.198	0.188	0.183857	0.0027982
09:30:09	27.7	0.178	0.177	0.177	0.181	0.185	0.196	0.189	0.183286	0.00271429
09:35:09	27.7	0.179	0.177	0.174	0.18	0.186	0.196	0.19	0.183143	0.0029635
09:40:09	27.7	0.18	0.177	0.175	0.181	0.186	0.197	0.189	0.183571	0.00289381
09:45:09	27.7	0.18	0.178	0.174	0.182	0.187	0.197	0.19	0.184	0.00296808
09:50:09	27.7	0.176	0.179	0.175	0.177	0.182	0.196	0.19	0.182143	0.0030034
09:55:09	27.7	0.174	0.18	0.175	0.177	0.18	0.197	0.191	0.182	0.00328053
10:00:09	27.7	0.175	0.167	0.172	0.178	0.181	0.186	0.192	0.178714	0.00320501
10:05:09	27.7	0.176	0.164	0.17	0.179	0.181	0.187	0.18	0.176714	0.00287613
10:10:09	27.7	0.177	0.165	0.171	0.18	0.182	0.188	0.181	0.177714	0.00287613
10:15:09	27.7	0.176	0.166	0.172	0.181	0.183	0.189	0.18	0.178143	0.00285714
10:20:09	27.7	0.176	0.163	0.173	0.181	0.184	0.19	0.176	0.177571	0.00325764
10:25:09	27.7	0.177	0.162	0.173	0.176	0.184	0.19	0.176	0.176857	0.00331252
10:30:09	27.7	0.178	0.163	0.174	0.177	0.184	0.191	0.175	0.177429	0.00328675
10:35:09	27.7	0.179	0.158	0.176	0.178	0.184	0.188	0.176	0.177	0.00357904
10:40:09	27.7	0.177	0.159	0.176	0.179	0.185	0.188	0.176	0.177143	0.00350121
10:45:09	27.7	0.178	0.16	0.174	0.179	0.182	0.189	0.175	0.176714	0.00336448
10:50:09	27.7	0.179	0.16	0.162	0.176	0.183	0.189	0.175	0.174857	0.0039966
10:55:09	27.7	0.173	0.159	0.161	0.176	0.183	0.189	0.176	0.173857	0.00410823
11:00:09	27.7	0.174	0.16	0.159	0.171	0.181	0.19	0.177	0.173143	0.00419426
11:05:09	27.7	0.175	0.16	0.16	0.171	0.181	0.18	0.178	0.172143	0.00337659
11:10:09	27.7	0.172	0.155	0.161	0.171	0.181	0.178	0.178	0.170857	0.00363468
11:15:09	27.7	0.173	0.152	0.158	0.171	0.181	0.178	0.179	0.170286	0.00420722
11:20:09	27.7	0.174	0.153	0.159	0.172	0.183	0.179	0.18	0.171429	0.00426981
11:25:09	27.7	0.175	0.151	0.16	0.173	0.183	0.176	0.18	0.171143	0.00433935
11:30:09	27.7	0.176	0.152	0.16	0.174	0.182	0.177	0.18	0.171571	0.0042306
11:35:09	27.7	0.174	0.153	0.161	0.175	0.183	0.178	0.181	0.172143	0.0041772
11:40:09	27.7	0.175	0.154	0.162	0.175	0.184	0.178	0.182	0.172857	0.00413135
11:45:09	27.7	0.175	0.154	0.163	0.176	0.183	0.179	0.182	0.173143	0.00405573
11:50:09	27.7	0.176	0.155	0.164	0.176	0.184	0.18	0.182	0.173857	0.00399064
11:55:09	27.7	0.177	0.155	0.165	0.177	0.184	0.18	0.183	0.174429	0.00401104
12:00:09	27.7	0.173	0.156	0.162	0.177	0.181	0.178	0.18	0.172429	0.00365707
12:05:09	27.7	0.174	0.149	0.162	0.178	0.18	0.178	0.172	0.170429	0.0042306
12:10:09	27.7	0.175	0.15	0.163	0.178	0.181	0.179	0.173	0.171286	0.00419021
12:15:09	27.7	0.17	0.151	0.164	0.179	0.18	0.179	0.173	0.170857	0.0039727
12:20:09	27.7	0.17	0.151	0.164	0.178	0.18	0.179	0.174	0.170857	0.00394262
12:25:09	27.7	0.171	0.152	0.165	0.179	0.181	0.18	0.174	0.171714	0.00392619
12:30:09	27.7	0.172	0.153	0.165	0.178	0.175	0.171	0.175	0.169857	0.00321032
12:35:09	27.7	0.172	0.153	0.166	0.176	0.176	0.172	0.175	0.17	0.0031244
12:40:09	27.7	0.167	0.154	0.166	0.176	0.177	0.172	0.175	0.169571	0.00306172
12:45:09	27.7	0.168	0.155	0.167	0.177	0.178	0.173	0.176	0.170571	0.00306172
12:50:09	27.7	0.168	0.155	0.168	0.178	0.178	0.174	0.176	0.171	0.00310913
12:55:09	27.7	0.169	0.153	0.169	0.176	0.177	0.175	0.17	0.169857	0.00308937
13:00:09	27.7	0.17	0.153	0.169	0.177	0.172	0.175	0.17	0.169429	0.00295084
13:05:09	27.7	0.171	0.154	0.17	0.178	0.172	0.176	0.17	0.170143	0.00293118
13:10:09	27.7	0.172	0.154	0.17	0.178	0.173	0.176	0.166	0.169857	0.00302709
13:15:09	27.7	0.17	0.15	0.171	0.178	0.174	0.177	0.167	0.169571	0.00357809
13:20:09	27.7	0.162	0.15	0.172	0.179	0.172	0.178	0.167	0.168571	0.00381636
13:25:09	27.7	0.161	0.15	0.164	0.18	0.172	0.173	0.168	0.166857	0.00366729
13:30:09	27.7	0.161	0.15	0.164	0.177	0.173	0.174	0.165	0.166286	0.00351672
13:35:09	27.7	0.161	0.147	0.165	0.178	0.174	0.174	0.166	0.166429	0.00395725
13:40:09	27.7	0.162	0.148	0.166	0.179	0.174	0.175	0.166	0.167143	0.00391839
13:45:09	27.7	0.163	0.148	0.166	0.18	0.175	0.173	0.166	0.167286	0.00392619
13:50:09	27.7	0.163	0.149	0.167	0.181	0.171	0.174	0.167	0.167429	0.00377874
13:55:09	27.7	0.164	0.149	0.168	0.181	0.169	0.175	0.16	0.166571	0.00392099
14:00:09	27.7	0.165	0.15	0.169	0.182	0.167	0.176	0.16	0.167	0.00394003
14:05:09	27.7	0.166	0.148	0.17	0.183	0.166	0.176	0.161	0.167143	0.00421126
14:10:09	27.7	0.166	0.148	0.17	0.18	0.167	0.175	0.161	0.166714	0.00390186
14:15:09	27.7	0.167	0.149	0.171	0.181	0.167	0.166	0.161	0.166	0.00367099
14:20:09	27.7	0.168	0.149	0.171	0.181	0.168	0.167	0.162	0.166571	0.00365707
14:25:09	27.7	0.168	0.15	0.172	0.182	0.168	0.167	0.163	0.167143	0.00364122
14:30:09	27.7	0.169	0.151	0.156	0.178	0.169	0.168	0.163	0.164857	0.00341864
14:35:09	27.7	0.17	0.151	0.157	0.179	0.17	0.168	0.16	0.165	0.00358569
14:40:09	27.7	0.17	0.151	0.158	0.17	0.163	0.169	0.156	0.162429	0.00288557
14:45:09	27.7	0.171	0.152	0.157	0.171	0.164	0.169	0.157	0.163	0.00291956
14:50:09	27.7	0.168	0.153	0.158	0.172	0.164	0.17	0.157	0.163143	0.00274667
14:55:09	27.7	0.169	0.153	0.159	0.164	0.165	0.17	0.158	0.162571	0.00233867
15:00:09	27.7	0.168	0.154	0.159	0.165	0.165	0.171	0.149	0.161571	0.00299092
15:05:09	27.7	0.169	0.154	0.16	0.161	0.165	0.168	0.149	0.160857	0.00277256
15:10:09	27.7	0.17	0.155	0.16	0.161	0.166	0.168	0.15	0.161429	0.00272429
15:15:09	27.7	0.17	0.155	0.161	0.162	0.167	0.165	0.15	0.161429	0.0026264
15:20:09	27.7	0.166	0.154	0.162	0.162	0.167	0.166	0.151	0.161143	0.00237475
15:25:09	27.7	0.166	0.154	0.162	0.163	0.164	0.167	0.151	0.161	0.0023094
15:30:09	27.7	0.166	0.155	0.162	0.163	0.165	0.156	0.151	0.159714	0.0021571
15:35:09	27.7	0.167	0.155	0.161	0.164	0.166	0.157	0.152	0.160286	0.00217906
15:40:09	27.7	0.156	0.156	0.161	0.164	0.166	0.157	0.153	0.159	0.00179947
15:45:09	27.7	0.156	0.156	0.162	0.164	0.156	0.157	0.154	0.157857	0.0013875
15:50:09	27.7	0.157	0.156	0.16	0.152	0.152	0.158	0.154	0.155571	0.00115175
15:55:09	27.7	0.157	0.157	0.161	0.152	0.152	0.157	0.155	0.155857	0.00120374
16:00:09	27.7	0.157	0.157	0.16	0.153	0.153	0.158	0.155	0.156143	0.000986301
16:05:09	27.7	0.157	0.156	0.16	0.153	0.153	0.158	0.156	0.156143	0.000961858
16:10:09	27.7	0.158	0.157	0.161	0.153	0.154	0.159	0.157	0.157	0.00104654
16:15:09	27.7	0.159	0.157	0.162	0.153	0.155	0.159	0.157	0.157429	0.00110964
16:20:09	27.7	0.159	0.158	0.162	0.154	0.155	0.16	0.158	0.158	0.00104654
16:25:09	27.7	0.16	0.148	0.163	0.154	0.156	0.16	0.159	0.157143	0.00188261
16:30:09	27.7	0.16	0.149	0.163	0.155	0.149	0.16	0.152	0.155429	0.00214761
16:35:09	27.7	0.161	0.15	0.164	0.156	0.15	0.161	0.153	0.156429	0.00214761
16:40:09	27.7	0.16	0.15	0.165	0.156	0.15	0.161	0.153	0.156429	0.00219151
16:45:09	27.7	0.161	0.151	0.165	0.156	0.151	0.162	0.154	0.157143	0.00210926
16:50:09	27.7	0.162	0.152	0.166	0.157	0.151	0.162	0.155	0.157857	0.00213172
16:55:09	27.7	0.162	0.152	0.166	0.157	0.151	0.163	0.155	0.158	0.00218218
17:00:09	27.6	0.16	0.152	0.167	0.158	0.146	0.163	0.156	0.157429	0.00263545
17:05:09	27.6	0.161	0.153	0.168	0.158	0.146	0.164	0.153	0.157571	0.00283563
17:10:09	27.6	0.151	0.153	0.169	0.159	0.147	0.165	0.143	0.155286	0.00358379
17:15:09	27.7	0.151	0.153	0.168	0.159	0.147	0.165	0.143	0.155143	0.00349441
17:20:09	27.6	0.151	0.154	0.168	0.16	0.141	0.164	0.143	0.154429	0.00387211
17:25:09	27.6	0.152	0.154	0.169	0.156	0.142	0.164	0.144	0.154429	0.00370236
17:30:09	27.7	0.152	0.155	0.17	0.156	0.143	0.165	0.144	0.155	0.00377964
17:35:09	27.6	0.144	0.156	0.17	0.157	0.143	0.165	0.145	0.154286	0.00405741
17:40:09	27.6	0.145	0.156	0.171	0.157	0.143	0.166	0.146	0.154857	0.00410243
17:45:09	27.7	0.145	0.157	0.172	0.157	0.144	0.166	0.146	0.155286	0.00413875
17:50:09	27.7	0.145	0.157	0.172	0.158	0.145	0.167	0.146	0.155714	0.00415024
17:55:09	27.6	0.146	0.158	0.171	0.158	0.145	0.167	0.147	0.156	0.00395209
18:00:09	27.7	0.146	0.159	0.171	0.159	0.145	0.168	0.147	0.156429	0.0040465
18:05:09	27.6	0.146	0.159	0.172	0.156	0.146	0.169	0.148	0.156571	0.00406997
18:10:09	27.6	0.147	0.16	0.172	0.156	0.147	0.17	0.148	0.157143	0.00403808
18:15:09	27.6	0.147	0.16	0.173	0.157	0.147	0.17	0.149	0.157571	0.00406997
18:20:09	27.6	0.147	0.161	0.173	0.157	0.147	0.171	0.149	0.157857	0.00416006
18:25:09	27.6	0.147	0.161	0.174	0.157	0.148	0.171	0.15	0.158286	0.00413875
18:30:09	27.6	0.148	0.162	0.174	0.158	0.148	0.172	0.15	0.158857	0.00416006
18:35:09	27.6	0.148	0.163	0.172	0.158	0.149	0.172	0.148	0.158571	0.00406997
18:40:09	27.7	0.149	0.163	0.173	0.159	0.149	0.172	0.149	0.159143	0.00402627
18:45:09	27.7	0.144	0.164	0.173	0.159	0.15	0.173	0.149	0.158857	0.00442627
18:50:09	27.6	0.144	0.164	0.174	0.16	0.15	0.174	0.15	0.159429	0.00452957
18:55:09	27.7	0.144	0.165	0.175	0.16	0.148	0.174	0.15	0.159429	0.00474019
19:00:09	27.6	0.145	0.165	0.175	0.161	0.149	0.174	0.15	0.159857	0.00461069
19:05:09	27.6	0.143	0.166	0.154	0.161	0.15	0.17	0.151	0.156429	0.00363093
19:10:09	27.6	0.143	0.166	0.154	0.162	0.15	0.171	0.151	0.156714	0.00375255
19:15:09	27.6	0.142	0.159	0.155	0.162	0.15	0.171	0.152	0.155857	0.00351479
19:20:09	27.6	0.142	0.159	0.156	0.163	0.151	0.171	0.152	0.156286	0.00351672
19:25:09	27.6	0.142	0.16	0.156	0.163	0.151	0.172	0.153	0.156714	0.00361027
19:30:09	27.6	0.134	0.16	0.156	0.164	0.151	0.172	0.154	0.155857	0.00449565
19:35:09	27.6	0.134	0.16	0.157	0.164	0.151	0.173	0.154	0.156143	0.0045848
19:40:09	27.6	0.135	0.159	0.157	0.165	0.152	0.172	0.154	0.156286	0.00438457
19:45:09	27.6	0.135	0.16	0.157	0.165	0.153	0.17	0.154	0.156286	0.00421852
19:50:09	27.6	0.135	0.16	0.158	0.157	0.153	0.17	0.155	0.155429	0.00398125
19:55:09	27.6	0.131	0.161	0.157	0.157	0.153	0.171	0.156	0.155143	0.00457961
20:00:09	27.7	0.129	0.162	0.158	0.158	0.154	0.171	0.156	0.155429	0.0048788
20:05:09	27.6	0.129	0.162	0.158	0.158	0.155	0.172	0.156	0.155714	0.00495078
20:10:09	27.6	0.13	0.162	0.158	0.158	0.154	0.172	0.157	0.155857	0.00483257
20:15:09	27.6	0.13	0.162	0.159	0.159	0.155	0.173	0.158	0.156571	0.00493219
20:20:09	27.6	0.13	0.162	0.16	0.159	0.155	0.173	0.158	0.156714	0.00494597
20:25:09	27.6	0.13	0.163	0.16	0.16	0.155	0.173	0.157	0.156857	0.00498296
20:30:09	27.6	0.131	0.163	0.161	0.16	0.156	0.174	0.157	0.157429	0.00494184
20:35:09	27.6	0.131	0.163	0.161	0.161	0.157	0.174	0.151	0.156857	0.0050447
20:40:09	27.7	0.131	0.164	0.162	0.159	0.157	0.175	0.152	0.157143	0.00512431
20:45:09	27.6	0.132	0.165	0.162	0.159	0.157	0.162	0.151	0.155429	0.00425864
20:50:09	27.6	0.132	0.165	0.162	0.159	0.155	0.155	0.151	0.154143	0.00409662
20:55:09	27.6	0.132	0.166	0.163	0.149	0.156	0.155	0.152	0.153286	0.00419588
21:00:09	27.6	0.133	0.167	0.138	0.149	0.156	0.156	0.152	0.150143	0.00436124
21:05:09	27.6	0.133	0.167	0.138	0.148	0.157	0.156	0.152	0.150143	0.0044047
21:10:09	27.6	0.133	0.168	0.138	0.133	0.158	0.157	0.152	0.148429	0.00522292
21:15:09	27.6	0.133	0.168	0.139	0.132	0.157	0.157	0.153	0.148429	0.00522748
21:20:09	27.6	0.134	0.169	0.139	0.132	0.157	0.157	0.154	0.148857	0.00527089
21:25:09	27.6	0.134	0.17	0.139	0.133	0.157	0.158	0.154	0.149286	0.0053261
21:30:09	27.6	0.134	0.17	0.14	0.133	0.158	0.158	0.154	0.149571	0.00531779
21:35:09	27.6	0.135	0.168	0.14	0.133	0.158	0.159	0.152	0.149286	0.00507897
21:40:09	27.6	0.135	0.168	0.14	0.133	0.158	0.159	0.152	0.149286	0.00507897
21:45:09	27.6	0.135	0.168	0.14	0.134	0.159	0.159	0.152	0.149571	0.00504672
21:50:09	27.6	0.135	0.169	0.141	0.134	0.159	0.16	0.152	0.15	0.00513624
21:55:09	27.6	0.135	0.169	0.141	0.134	0.16	0.16	0.153	0.150286	0.00519026
22:00:09	27.6	0.135	0.169	0.141	0.134	0.16	0.16	0.153	0.150286	0.00519026
22:05:09	27.6	0.135	0.17	0.141	0.135	0.16	0.161	0.154	0.150857	0.00526185
22:10:09	27.6	0.136	0.17	0.141	0.135	0.16	0.161	0.153	0.150857	0.00517976
22:15:09	27.6	0.136	0.171	0.142	0.135	0.161	0.162	0.154	0.151571	0.00532227
22:20:09	27.6	0.136	0.171	0.142	0.136	0.161	0.162	0.139	0.149571	0.00552422
22:25:09	27.6	0.136	0.171	0.142	0.136	0.161	0.162	0.139	0.149571	0.00552422
22:30:09	27.6	0.136	0.172	0.142	0.136	0.161	0.163	0.139	0.149857	0.00567127
22:35:09	27.6	0.137	0.172	0.143	0.136	0.162	0.147	0.139	0.148	0.00521901
22:40:09	27.6	0.137	0.173	0.143	0.137	0.162	0.148	0.139	0.148429	0.00527283
22:45:09	27.6	0.137	0.173	0.144	0.137	0.163	0.148	0.139	0.148714	0.00531267
22:50:09	27.6	0.138	0.174	0.144	0.137	0.163	0.148	0.139	0.149	0.00537188
22:55:09	27.6	0.138	0.171	0.144	0.137	0.164	0.149	0.14	0.149	0.00507093
23:00:09	27.6	0.138	0.172	0.144	0.137	0.165	0.149	0.14	0.149286	0.00524502
23:05:09	27.6	0.139	0.172	0.145	0.137	0.164	0.15	0.14	0.149571	0.00510302
23:10:09	27.6	0.139	0.173	0.134	0.138	0.165	0.15	0.141	0.148571	0.00565204
23:15:09	27.6	0.139	0.173	0.134	0.137	0.165	0.15	0.141	0.148429	0.00569819
23:20:09	27.6	0.139	0.171	0.134	0.137	0.155	0.151	0.141	0.146857	0.00493977
23:25:09	27.6	0.14	0.171	0.134	0.138	0.155	0.151	0.141	0.147143	0.00485714
23:30:09	27.6	0.14	0.172	0.134	0.138	0.156	0.152	0.141	0.147571	0.00503255
23:35:09	27.6	0.14	0.152	0.135	0.138	0.156	0.152	0.142	0.145	0.00309377
23:40:09	27.6	0.141	0.153	0.135	0.138	0.151	0.153	0.142	0.144714	0.00283443
23:45:09	27.6	0.141	0.153	0.135	0.139	0.151	0.153	0.142	0.144857	0.00278113
23:50:09	27.6	0.141	0.153	0.135	0.135	0.152	0.154	0.142	0.144571	0.00315366
23:55:09	27.6	0.142	0.153	0.136	0.135	0.152	0.154	0.143	0.145	0.00303942
1 day, 0:00:09	27.6	0.142	0.153	0.136	0.136	0.153	0.154	0.143	0.145286	0.00302147
1 day, 0:05:09	27.6	0.142	0.154	0.136	0.136	0.153	0.155	0.143	0.145571	0.00315366
1 day, 0:10:09	27.6	0.143	0.154	0.136	0.136	0.153	0.155	0.143	0.145714	0.00312984
1 day, 0:15:09	27.6	0.143	0.155	0.131	0.136	0.154	0.139	0.144	0.143143	0.00336246
1 day, 0:20:09	27.6	0.143	0.155	0.132	0.135	0.154	0.139	0.144	0.143143	0.00333401
1 day, 0:25:09	27.6	0.143	0.155	0.132	0.136	0.155	0.139	0.144	0.143429	0.00335841
1 day, 0:30:09	27.6	0.143	0.156	0.132	0.136	0.155	0.139	0.144	0.143571	0.00344243
1 day, 0:35:09	27.6	0.144	0.139	0.132	0.136	0.139	0.14	0.144	0.139143	0.00160992
1 day, 0:40:09	27.6	0.144	0.14	0.132	0.136	0.139	0.14	0.144	0.139286	0.00161414
1 day, 0:45:09	27.6	0.144	0.141	0.133	0.136	0.14	0.14	0.145	0.139857	0.00159506
1 day, 0:50:09	27.6	0.145	0.141	0.133	0.136	0.14	0.14	0.145	0.14	0.0016619
1 day, 0:55:09	27.6	0.145	0.142	0.133	0.137	0.141	0.14	0.145	0.140429	0.00163091
1 day, 1:00:09	27.7	0.145	0.142	0.133	0.137	0.141	0.14	0.145	0.140429	0.00163091

## Sheet: KB_SBW25
Time	T° 600	B7	B9	B11	D8	D10	F7	F9		raw data - medium control mean	B7	B9	B11	D8	D10	F7	F9	Mean	SE
00:00:09	27.1	0.14	0.135	0.157	0.148	0.286	0.132	0.188			0.0232857	0.0182857	0.0402857	0.0312857	0.169286	0.0152857	0.0712857	0.0527143	0.0207018
00:05:09	27.2	0.139	0.137	0.154	0.151	0.271	0.137	0.192			0.0222857	0.0202857	0.0372857	0.0342857	0.154286	0.0202857	0.0752857	0.052	0.0185353
00:10:09	27.2	0.141	0.137	0.154	0.154	0.263	0.143	0.199			0.0241429	0.0201429	0.0371429	0.0371429	0.146143	0.0261429	0.0821429	0.0532857	0.0173623
00:15:09	27.3	0.144	0.136	0.152	0.153	0.257	0.148	0.204			0.0272857	0.0192857	0.0352857	0.0362857	0.140286	0.0312857	0.0872857	0.0538571	0.016656
00:20:09	27.3	0.145	0.136	0.153	0.152	0.252	0.153	0.209			0.0282857	0.0192857	0.0362857	0.0352857	0.135286	0.0362857	0.0922857	0.0547143	0.0161199
00:25:09	27.3	0.145	0.136	0.154	0.151	0.248	0.157	0.212			0.0282857	0.0192857	0.0372857	0.0342857	0.131286	0.0402857	0.0952857	0.0551429	0.015729
00:30:09	27.3	0.146	0.136	0.153	0.152	0.246	0.16	0.214			0.0292857	0.0192857	0.0362857	0.0352857	0.129286	0.0432857	0.0972857	0.0557143	0.0155194
00:35:09	27.4	0.146	0.136	0.153	0.151	0.244	0.162	0.216			0.0294286	0.0194286	0.0364286	0.0344286	0.127429	0.0454286	0.0994286	0.056	0.0154239
00:40:09	27.4	0.146	0.136	0.154	0.15	0.242	0.163	0.218			0.0294286	0.0194286	0.0374286	0.0334286	0.125429	0.0464286	0.101429	0.0561429	0.0153324
00:45:09	27.4	0.147	0.136	0.154	0.15	0.24	0.165	0.22			0.0307143	0.0197143	0.0377143	0.0337143	0.123714	0.0487143	0.103714	0.0568571	0.0151947
00:50:09	27.5	0.147	0.136	0.154	0.153	0.24	0.166	0.221			0.0304286	0.0194286	0.0374286	0.0364286	0.123429	0.0494286	0.104429	0.0572857	0.0151523
00:55:09	27.5	0.148	0.136	0.155	0.158	0.239	0.166	0.223			0.0314286	0.0194286	0.0384286	0.0414286	0.122429	0.0494286	0.106429	0.0584286	0.0149762
01:00:09	27.5	0.148	0.136	0.156	0.162	0.24	0.167	0.226			0.0312857	0.0192857	0.0392857	0.0452857	0.123286	0.0502857	0.109286	0.0597143	0.0151624
01:05:09	27.5	0.148	0.138	0.157	0.158	0.241	0.169	0.23			0.0308571	0.0208571	0.0398571	0.0408571	0.123857	0.0518571	0.112857	0.0601429	0.0155007
01:10:09	27.5	0.149	0.139	0.158	0.16	0.245	0.173	0.236			0.0312857	0.0212857	0.0402857	0.0422857	0.127286	0.0552857	0.118286	0.0622857	0.0161363
01:15:09	27.5	0.15	0.141	0.16	0.163	0.248	0.178	0.242			0.031	0.022	0.041	0.044	0.129	0.059	0.123	0.0641429	0.0165564
01:20:09	27.5	0.153	0.142	0.163	0.167	0.251	0.186	0.249			0.033	0.022	0.043	0.047	0.131	0.066	0.129	0.0672857	0.0169716
01:25:09	27.5	0.157	0.143	0.167	0.167	0.254	0.194	0.256			0.0354286	0.0214286	0.0454286	0.0454286	0.132429	0.0724286	0.134429	0.0695714	0.0174676
01:30:09	27.5	0.161	0.145	0.172	0.167	0.257	0.201	0.263			0.0382857	0.0222857	0.0492857	0.0442857	0.134286	0.0782857	0.140286	0.0724286	0.0179104
01:35:09	27.5	0.167	0.146	0.179	0.169	0.26	0.208	0.27			0.043	0.022	0.055	0.045	0.136	0.084	0.146	0.0758571	0.0182384
01:40:09	27.5	0.174	0.148	0.182	0.173	0.261	0.216	0.276			0.049	0.023	0.057	0.048	0.136	0.091	0.151	0.0792857	0.0182948
01:45:09	27.5	0.179	0.15	0.183	0.176	0.262	0.222	0.278			0.0527143	0.0237143	0.0567143	0.0497143	0.135714	0.0957143	0.151714	0.0808571	0.0181665
01:50:09	27.5	0.18	0.152	0.184	0.177	0.262	0.227	0.28			0.0522857	0.0242857	0.0562857	0.0492857	0.134286	0.0992857	0.152286	0.0811429	0.0182005
01:55:09	27.5	0.18	0.154	0.187	0.179	0.264	0.232	0.282			0.0508571	0.0248571	0.0578571	0.0498571	0.134857	0.102857	0.152857	0.082	0.0183231
02:00:09	27.5	0.182	0.157	0.19	0.181	0.265	0.237	0.285			0.0518571	0.0268571	0.0598571	0.0508571	0.134857	0.106857	0.154857	0.0837143	0.0183283
02:05:09	27.5	0.186	0.159	0.193	0.183	0.268	0.24	0.285			0.0547143	0.0277143	0.0617143	0.0517143	0.136714	0.108714	0.153714	0.085	0.0181314
02:10:09	27.5	0.189	0.162	0.195	0.186	0.27	0.244	0.286			0.0561429	0.0291429	0.0621429	0.0531429	0.137143	0.111143	0.153143	0.086	0.0179476
02:15:09	27.5	0.196	0.165	0.197	0.189	0.273	0.247	0.288			0.062	0.031	0.063	0.055	0.139	0.113	0.154	0.0881429	0.0177421
02:20:09	27.5	0.202	0.167	0.199	0.191	0.275	0.25	0.29			0.0668571	0.0318571	0.0638571	0.0558571	0.139857	0.114857	0.154857	0.0897143	0.0176439
02:25:09	27.5	0.208	0.171	0.202	0.195	0.277	0.255	0.291			0.0718571	0.0348571	0.0658571	0.0588571	0.140857	0.118857	0.154857	0.0922857	0.0172597
02:30:09	27.5	0.212	0.174	0.203	0.198	0.279	0.258	0.293			0.0748571	0.0368571	0.0658571	0.0608571	0.141857	0.120857	0.155857	0.0938571	0.0171548
02:35:09	27.5	0.217	0.179	0.206	0.202	0.282	0.263	0.297			0.0784286	0.0404286	0.0674286	0.0634286	0.143429	0.124429	0.158429	0.0965714	0.0170621
02:40:09	27.5	0.223	0.184	0.209	0.206	0.285	0.267	0.299			0.0834286	0.0444286	0.0694286	0.0664286	0.145429	0.127429	0.159429	0.0994286	0.0167403
02:45:09	27.5	0.227	0.187	0.212	0.209	0.288	0.27	0.301			0.0862857	0.0462857	0.0712857	0.0682857	0.147286	0.129286	0.160286	0.101286	0.0166333
02:50:09	27.5	0.231	0.189	0.215	0.214	0.29	0.274	0.305			0.0891429	0.0471429	0.0731429	0.0721429	0.148143	0.132143	0.163143	0.103571	0.0166603
02:55:09	27.5	0.236	0.191	0.22	0.22	0.294	0.279	0.308			0.0928571	0.0478571	0.0768571	0.0768571	0.150857	0.135857	0.164857	0.106571	0.0166315
03:00:09	27.5	0.241	0.192	0.224	0.224	0.297	0.283	0.311			0.0967143	0.0477143	0.0797143	0.0797143	0.152714	0.138714	0.166714	0.108857	0.0167238
03:05:09	27.5	0.246	0.195	0.23	0.23	0.302	0.287	0.314			0.100714	0.0497143	0.0847143	0.0847143	0.156714	0.141714	0.168714	0.112429	0.0166143
03:10:09	27.5	0.251	0.197	0.233	0.234	0.306	0.291	0.317			0.104429	0.0504286	0.0864286	0.0874286	0.159429	0.144429	0.170429	0.114714	0.0167399
03:15:09	27.5	0.257	0.2	0.237	0.241	0.31	0.295	0.322			0.109429	0.0524286	0.0894286	0.0934286	0.162429	0.147429	0.174429	0.118429	0.016773
03:20:09	27.6	0.262	0.201	0.241	0.245	0.314	0.299	0.325			0.113	0.052	0.092	0.096	0.165	0.15	0.176	0.120571	0.0169676
03:25:09	27.6	0.27	0.203	0.247	0.255	0.32	0.305	0.329			0.120143	0.0531429	0.0971429	0.105143	0.170143	0.155143	0.179143	0.125714	0.0170655
03:30:09	27.6	0.274	0.206	0.252	0.258	0.324	0.308	0.334			0.122714	0.0547143	0.100714	0.106714	0.172714	0.156714	0.182714	0.128143	0.017192
03:35:09	27.6	0.281	0.207	0.259	0.266	0.331	0.314	0.34			0.128429	0.0544286	0.106429	0.113429	0.178429	0.161429	0.187429	0.132857	0.0176728
03:40:09	27.6	0.285	0.21	0.266	0.271	0.335	0.317	0.344			0.131	0.056	0.112	0.117	0.181	0.163	0.19	0.135714	0.0176145
03:45:09	27.6	0.294	0.214	0.272	0.277	0.343	0.324	0.35			0.139	0.059	0.117	0.122	0.188	0.169	0.195	0.141286	0.0179771
03:50:09	27.6	0.298	0.218	0.279	0.283	0.345	0.328	0.355			0.142	0.062	0.123	0.127	0.189	0.172	0.199	0.144857	0.0177863
03:55:09	27.6	0.306	0.221	0.285	0.287	0.35	0.334	0.359			0.148714	0.0637143	0.127714	0.129714	0.192714	0.176714	0.201714	0.148714	0.0179656
04:00:09	27.6	0.311	0.225	0.291	0.292	0.357	0.337	0.363			0.152286	0.0662857	0.132286	0.133286	0.198286	0.178286	0.204286	0.152143	0.0180296
04:05:09	27.6	0.321	0.229	0.298	0.297	0.36	0.342	0.367			0.161143	0.0691429	0.138143	0.137143	0.200143	0.182143	0.207143	0.156429	0.0179227
04:10:09	27.6	0.326	0.233	0.302	0.301	0.362	0.346	0.371			0.165143	0.0721429	0.141143	0.140143	0.201143	0.185143	0.210143	0.159286	0.0178158
04:15:09	27.6	0.334	0.239	0.307	0.306	0.366	0.351	0.376			0.172	0.077	0.145	0.144	0.204	0.189	0.214	0.163571	0.0176728
04:20:09	27.6	0.338	0.242	0.311	0.311	0.369	0.355	0.38			0.174714	0.0787143	0.147714	0.147714	0.205714	0.191714	0.216714	0.166143	0.0177104
04:25:09	27.6	0.346	0.248	0.315	0.316	0.374	0.359	0.385			0.181857	0.0838571	0.150857	0.151857	0.209857	0.194857	0.220857	0.170571	0.0176254
04:30:09	27.6	0.352	0.252	0.319	0.321	0.38	0.362	0.39			0.186429	0.0864286	0.153429	0.155429	0.214429	0.196429	0.224429	0.173857	0.0177762
04:35:09	27.6	0.358	0.257	0.321	0.327	0.388	0.368	0.394			0.191	0.09	0.154	0.16	0.221	0.201	0.227	0.177714	0.017989
04:40:09	27.6	0.367	0.263	0.327	0.331	0.393	0.372	0.399			0.199	0.095	0.159	0.163	0.225	0.204	0.231	0.182286	0.0179161
04:45:09	27.6	0.369	0.267	0.332	0.335	0.398	0.379	0.404			0.2	0.098	0.163	0.166	0.229	0.21	0.235	0.185857	0.0180574
04:50:09	27.6	0.382	0.271	0.337	0.34	0.4	0.385	0.409			0.212	0.101	0.167	0.17	0.23	0.215	0.239	0.190571	0.0182298
04:55:09	27.6	0.39	0.275	0.34	0.346	0.407	0.391	0.413			0.219	0.104	0.169	0.175	0.236	0.22	0.242	0.195	0.0185472
05:00:09	27.6	0.401	0.281	0.347	0.353	0.411	0.396	0.417			0.228714	0.108714	0.174714	0.180714	0.238714	0.223714	0.244714	0.2	0.0184064
05:05:09	27.6	0.404	0.286	0.356	0.362	0.413	0.399	0.422			0.231857	0.113857	0.183857	0.189857	0.240857	0.226857	0.249857	0.205286	0.017915
05:10:09	27.6	0.409	0.29	0.368	0.371	0.417	0.404	0.427			0.236286	0.117286	0.195286	0.198286	0.244286	0.231286	0.254286	0.211	0.0177438
05:15:09	27.6	0.415	0.293	0.382	0.38	0.42	0.407	0.435			0.242	0.12	0.209	0.207	0.247	0.234	0.262	0.217286	0.0178695
05:20:09	27.6	0.421	0.298	0.397	0.387	0.425	0.412	0.443			0.247429	0.124429	0.223429	0.213429	0.251429	0.238429	0.269429	0.224	0.0179945
05:25:09	27.6	0.426	0.307	0.413	0.391	0.431	0.418	0.45			0.251571	0.132571	0.238571	0.216571	0.256571	0.243571	0.275571	0.230714	0.0177112
05:30:09	27.6	0.43	0.313	0.423	0.407	0.438	0.425	0.456			0.254286	0.137286	0.247286	0.231286	0.262286	0.249286	0.280286	0.237429	0.0176223
05:35:09	27.6	0.437	0.32	0.429	0.427	0.445	0.432	0.46			0.261143	0.144143	0.253143	0.251143	0.269143	0.256143	0.284143	0.245571	0.0174395
05:40:09	27.6	0.444	0.322	0.439	0.483	0.453	0.438	0.469			0.267571	0.145571	0.262571	0.306571	0.276571	0.261571	0.292571	0.259	0.0199151
05:45:09	27.6	0.45	0.325	0.458	0.56	0.46	0.447	0.476			0.272286	0.147286	0.280286	0.382286	0.282286	0.269286	0.298286	0.276	0.0260391
05:50:09	27.6	0.459	0.329	0.543	0.599	0.468	0.453	0.485			0.281	0.151	0.365	0.421	0.29	0.275	0.307	0.298571	0.0316934
05:55:09	27.6	0.468	0.336	0.576	0.624	0.484	0.467	0.508			0.29	0.158	0.398	0.446	0.306	0.289	0.33	0.316714	0.0346016
06:00:09	27.6	0.479	0.341	0.604	0.646	0.5	0.492	0.527			0.300286	0.162286	0.425286	0.467286	0.321286	0.313286	0.348286	0.334	0.0370056
06:05:09	27.6	0.49	0.346	0.609	0.642	0.569	0.536	0.604			0.311286	0.167286	0.430286	0.463286	0.390286	0.357286	0.425286	0.363571	0.0378649
06:10:09	27.6	0.51	0.354	0.613	0.648	0.651	0.593	0.657			0.331	0.175	0.434	0.469	0.472	0.414	0.478	0.396143	0.0415941
06:15:09	27.6	0.607	0.361	0.62	0.651	0.683	0.633	0.671			0.427714	0.181714	0.440714	0.471714	0.503714	0.453714	0.491714	0.424429	0.0417171
06:20:09	27.6	0.654	0.367	0.634	0.642	0.682	0.66	0.678			0.474143	0.187143	0.454143	0.462143	0.502143	0.480143	0.498143	0.436857	0.0421385
06:25:09	27.6	0.669	0.376	0.634	0.639	0.659	0.681	0.693			0.488143	0.195143	0.453143	0.458143	0.478143	0.500143	0.512143	0.440714	0.0417041
06:30:08	27.6	0.679	0.384	0.624	0.639	0.675	0.696	0.697			0.497429	0.202429	0.442429	0.457429	0.493429	0.514429	0.515429	0.446143	0.0419374
06:35:09	27.6	0.689	0.393	0.622	0.632	0.677	0.701	0.698			0.507143	0.211143	0.440143	0.450143	0.495143	0.519143	0.516143	0.448429	0.0412863
06:40:09	27.6	0.708	0.405	0.614	0.625	0.679	0.698	0.698			0.526714	0.223714	0.432714	0.443714	0.497714	0.516714	0.516714	0.451143	0.0404138
06:45:09	27.6	0.709	0.422	0.61	0.62	0.676	0.699	0.695			0.527286	0.240286	0.428286	0.438286	0.494286	0.517286	0.513286	0.451286	0.0381239
06:50:09	27.6	0.72	0.456	0.605	0.616	0.67	0.692	0.692			0.537286	0.273286	0.422286	0.433286	0.487286	0.509286	0.509286	0.453143	0.0338923
06:55:09	27.6	0.717	0.557	0.606	0.614	0.668	0.686	0.691			0.534	0.374	0.423	0.431	0.485	0.503	0.508	0.465429	0.021632
07:00:09	27.6	0.714	0.606	0.602	0.609	0.663	0.685	0.689			0.531	0.423	0.419	0.426	0.48	0.502	0.506	0.469571	0.0175158
07:05:09	27.6	0.709	0.634	0.599	0.607	0.659	0.683	0.687			0.525571	0.450571	0.415571	0.423571	0.475571	0.499571	0.503571	0.470571	0.015897
07:10:09	27.6	0.709	0.646	0.599	0.605	0.658	0.681	0.685			0.525714	0.462714	0.415714	0.421714	0.474714	0.497714	0.501714	0.471429	0.0155972
07:15:09	27.6	0.709	0.634	0.598	0.602	0.657	0.676	0.684			0.526857	0.451857	0.415857	0.419857	0.474857	0.493857	0.501857	0.469286	0.0158953
07:20:09	27.6	0.705	0.632	0.598	0.601	0.654	0.674	0.684			0.522429	0.449429	0.415429	0.418429	0.471429	0.491429	0.501429	0.467143	0.015585
07:25:09	27.6	0.705	0.64	0.598	0.6	0.65	0.674	0.68			0.522143	0.457143	0.415143	0.417143	0.467143	0.491143	0.497143	0.466714	0.0152781
07:30:09	27.6	0.705	0.629	0.599	0.599	0.646	0.672	0.676			0.522429	0.446429	0.416429	0.416429	0.463429	0.489429	0.493429	0.464	0.0152454
07:35:09	27.6	0.703	0.625	0.599	0.599	0.645	0.668	0.677			0.519857	0.441857	0.415857	0.415857	0.461857	0.484857	0.493857	0.462	0.0150783
07:40:09	27.6	0.701	0.621	0.599	0.599	0.644	0.669	0.677			0.517	0.437	0.415	0.415	0.46	0.485	0.493	0.460286	0.0150724
07:45:09	27.6	0.7	0.612	0.599	0.598	0.644	0.667	0.677			0.515714	0.427714	0.414714	0.413714	0.459714	0.482714	0.492714	0.458143	0.0153543
07:50:09	27.6	0.702	0.612	0.601	0.599	0.647	0.667	0.675			0.517429	0.427429	0.416429	0.414429	0.462429	0.482429	0.490429	0.458714	0.015242
07:55:09	27.6	0.702	0.608	0.599	0.6	0.645	0.666	0.676			0.517143	0.423143	0.414143	0.415143	0.460143	0.481143	0.491143	0.457429	0.0155145
08:00:09	27.6	0.701	0.602	0.592	0.6	0.645	0.665	0.674			0.517286	0.418286	0.408286	0.416286	0.461286	0.481286	0.490286	0.456143	0.0160912
08:05:09	27.6	0.701	0.596	0.592	0.601	0.645	0.664	0.674			0.516571	0.411571	0.407571	0.416571	0.460571	0.479571	0.489571	0.454571	0.0163532
08:10:09	27.6	0.702	0.597	0.593	0.601	0.646	0.665	0.675			0.516857	0.411857	0.407857	0.415857	0.460857	0.479857	0.489857	0.454714	0.0164091
08:15:09	27.6	0.704	0.596	0.595	0.603	0.647	0.665	0.675			0.518571	0.410571	0.409571	0.417571	0.461571	0.479571	0.489571	0.455286	0.0164182
08:20:09	27.6	0.704	0.596	0.595	0.605	0.646	0.666	0.676			0.518	0.41	0.409	0.419	0.46	0.48	0.49	0.455143	0.0163888
08:25:09	27.6	0.705	0.595	0.595	0.606	0.648	0.667	0.676			0.519286	0.409286	0.409286	0.420286	0.462286	0.481286	0.490286	0.456	0.0165468
08:30:09	27.6	0.701	0.591	0.592	0.605	0.647	0.667	0.675			0.515429	0.405429	0.406429	0.419429	0.461429	0.481429	0.489429	0.454143	0.0166572
08:35:09	27.6	0.7	0.592	0.591	0.606	0.645	0.668	0.676			0.515714	0.407714	0.406714	0.421714	0.460714	0.483714	0.491714	0.455429	0.0165942
08:40:09	27.7	0.702	0.592	0.592	0.606	0.647	0.667	0.673			0.516857	0.406857	0.406857	0.420857	0.461857	0.481857	0.487857	0.454714	0.0165291
08:45:09	27.7	0.702	0.589	0.592	0.606	0.646	0.668	0.672			0.517143	0.404143	0.407143	0.421143	0.461143	0.483143	0.487143	0.454429	0.0167228
08:50:09	27.7	0.702	0.588	0.593	0.607	0.644	0.667	0.672			0.517	0.403	0.408	0.422	0.459	0.482	0.487	0.454	0.0166247
08:55:09	27.7	0.701	0.589	0.594	0.606	0.644	0.668	0.672			0.516286	0.404286	0.409286	0.421286	0.459286	0.483286	0.487286	0.454429	0.0164844
09:00:09	27.7	0.702	0.587	0.594	0.604	0.645	0.665	0.67			0.518429	0.403429	0.410429	0.420429	0.461429	0.481429	0.486429	0.454571	0.0166124
09:05:09	27.7	0.701	0.587	0.594	0.606	0.646	0.665	0.668			0.518286	0.404286	0.411286	0.423286	0.463286	0.482286	0.485286	0.455429	0.0163466
09:10:09	27.7	0.698	0.587	0.591	0.604	0.644	0.665	0.67			0.514429	0.403429	0.407429	0.420429	0.460429	0.481429	0.486429	0.453429	0.0164375
09:15:09	27.7	0.696	0.586	0.592	0.606	0.645	0.666	0.668			0.512	0.402	0.408	0.422	0.461	0.482	0.484	0.453	0.0161348
09:20:09	27.7	0.696	0.586	0.593	0.607	0.646	0.665	0.668			0.511571	0.401571	0.408571	0.422571	0.461571	0.480571	0.483571	0.452857	0.0159936
09:25:09	27.7	0.696	0.586	0.592	0.607	0.646	0.666	0.668			0.512143	0.402143	0.408143	0.423143	0.462143	0.482143	0.484143	0.453429	0.0161019
09:30:09	27.7	0.697	0.588	0.593	0.606	0.646	0.666	0.67			0.513714	0.404714	0.409714	0.422714	0.462714	0.482714	0.486714	0.454714	0.0161112
09:35:09	27.7	0.699	0.59	0.593	0.607	0.647	0.667	0.67			0.515857	0.406857	0.409857	0.423857	0.463857	0.483857	0.486857	0.455857	0.0161466
09:40:09	27.7	0.697	0.589	0.593	0.607	0.647	0.668	0.671			0.513429	0.405429	0.409429	0.423429	0.463429	0.484429	0.487429	0.455286	0.016134
09:45:09	27.7	0.698	0.59	0.594	0.605	0.649	0.666	0.671			0.514	0.406	0.41	0.421	0.465	0.482	0.487	0.455	0.0161216
09:50:09	27.7	0.696	0.59	0.595	0.606	0.649	0.667	0.671			0.513857	0.407857	0.412857	0.423857	0.466857	0.484857	0.488857	0.457	0.0158737
09:55:09	27.7	0.697	0.592	0.595	0.607	0.649	0.669	0.673			0.515	0.41	0.413	0.425	0.467	0.487	0.491	0.458286	0.0159444
10:00:09	27.7	0.695	0.588	0.596	0.608	0.65	0.668	0.67			0.516286	0.409286	0.417286	0.429286	0.471286	0.489286	0.491286	0.460571	0.0157884
10:05:09	27.7	0.694	0.591	0.595	0.607	0.65	0.669	0.67			0.517286	0.414286	0.418286	0.430286	0.473286	0.492286	0.493286	0.462714	0.015637
10:10:09	27.7	0.693	0.591	0.596	0.608	0.647	0.669	0.671			0.515286	0.413286	0.418286	0.430286	0.469286	0.491286	0.493286	0.461571	0.0154438
10:15:09	27.7	0.694	0.591	0.596	0.61	0.648	0.668	0.673			0.515857	0.412857	0.417857	0.431857	0.469857	0.489857	0.494857	0.461857	0.0154996
10:20:09	27.7	0.695	0.592	0.596	0.609	0.648	0.667	0.673			0.517429	0.414429	0.418429	0.431429	0.470429	0.489429	0.495429	0.462429	0.0155134
10:25:09	27.7	0.696	0.592	0.596	0.609	0.646	0.667	0.674			0.519143	0.415143	0.419143	0.432143	0.469143	0.490143	0.497143	0.463143	0.0156281
10:30:09	27.7	0.697	0.593	0.597	0.609	0.647	0.669	0.676			0.519571	0.415571	0.419571	0.431571	0.469571	0.491571	0.498571	0.463714	0.0157698
10:35:09	27.7	0.698	0.594	0.597	0.61	0.648	0.668	0.677			0.521	0.417	0.42	0.433	0.471	0.491	0.5	0.464714	0.0157551
10:40:09	27.7	0.698	0.593	0.596	0.607	0.643	0.669	0.678			0.520857	0.415857	0.418857	0.429857	0.465857	0.491857	0.500857	0.463429	0.0161021
10:45:09	27.7	0.695	0.593	0.597	0.607	0.642	0.669	0.677			0.518286	0.416286	0.420286	0.430286	0.465286	0.492286	0.500286	0.463286	0.0157253
10:50:09	27.7	0.696	0.592	0.596	0.609	0.644	0.67	0.679			0.521143	0.417143	0.421143	0.434143	0.469143	0.495143	0.504143	0.466	0.0160125
10:55:09	27.7	0.695	0.592	0.596	0.609	0.642	0.67	0.679			0.521143	0.418143	0.422143	0.435143	0.468143	0.496143	0.505143	0.466571	0.0159237
11:00:09	27.7	0.696	0.594	0.597	0.61	0.643	0.67	0.677			0.522857	0.420857	0.423857	0.436857	0.469857	0.496857	0.503857	0.467857	0.0156388
11:05:09	27.7	0.696	0.594	0.597	0.612	0.645	0.671	0.678			0.523857	0.421857	0.424857	0.439857	0.472857	0.498857	0.505857	0.469714	0.0156531
11:10:09	27.7	0.696	0.595	0.599	0.613	0.646	0.669	0.677			0.525143	0.424143	0.428143	0.442143	0.475143	0.498143	0.506143	0.471286	0.0152634
11:15:09	27.7	0.697	0.597	0.598	0.614	0.648	0.667	0.679			0.526714	0.426714	0.427714	0.443714	0.477714	0.496714	0.508714	0.472571	0.0152712
11:20:09	27.7	0.697	0.599	0.599	0.612	0.649	0.667	0.677			0.525571	0.427571	0.427571	0.440571	0.477571	0.495571	0.505571	0.471429	0.015053
11:25:09	27.7	0.698	0.599	0.599	0.611	0.65	0.669	0.677			0.526857	0.427857	0.427857	0.439857	0.478857	0.497857	0.505857	0.472143	0.0152764
11:30:09	27.7	0.698	0.6	0.601	0.612	0.647	0.666	0.677			0.526429	0.428429	0.429429	0.440429	0.475429	0.494429	0.505429	0.471429	0.0148805
11:35:09	27.7	0.694	0.599	0.602	0.612	0.645	0.666	0.676			0.521857	0.426857	0.429857	0.439857	0.472857	0.493857	0.503857	0.469857	0.01447
11:40:09	27.7	0.694	0.598	0.603	0.613	0.643	0.667	0.674			0.521143	0.425143	0.430143	0.440143	0.470143	0.494143	0.501143	0.468857	0.0143522
11:45:09	27.7	0.694	0.599	0.603	0.615	0.644	0.665	0.675			0.520857	0.425857	0.429857	0.441857	0.470857	0.491857	0.501857	0.469	0.014163
11:50:09	27.7	0.695	0.601	0.604	0.616	0.644	0.664	0.675			0.521143	0.427143	0.430143	0.442143	0.470143	0.490143	0.501143	0.468857	0.0139586
11:55:09	27.7	0.694	0.602	0.603	0.617	0.645	0.663	0.672			0.519571	0.427571	0.428571	0.442571	0.470571	0.488571	0.497571	0.467857	0.0136272
12:00:09	27.7	0.693	0.602	0.603	0.618	0.647	0.662	0.673			0.520571	0.429571	0.430571	0.445571	0.474571	0.489571	0.500571	0.470143	0.013524
12:05:09	27.7	0.694	0.605	0.604	0.619	0.649	0.663	0.674			0.523571	0.434571	0.433571	0.448571	0.478571	0.492571	0.503571	0.473571	0.0133915
12:10:09	27.7	0.694	0.606	0.604	0.619	0.649	0.662	0.672			0.522714	0.434714	0.432714	0.447714	0.477714	0.490714	0.500714	0.472429	0.013185
12:15:09	27.7	0.693	0.604	0.605	0.621	0.648	0.663	0.669			0.522143	0.433143	0.434143	0.450143	0.477143	0.492143	0.498143	0.472429	0.0129554
12:20:09	27.7	0.693	0.606	0.607	0.622	0.649	0.663	0.669			0.522143	0.435143	0.436143	0.451143	0.478143	0.492143	0.498143	0.473286	0.0126386
12:25:09	27.7	0.692	0.604	0.608	0.62	0.649	0.662	0.669			0.520286	0.432286	0.436286	0.448286	0.477286	0.490286	0.497286	0.471714	0.0126752
12:30:09	27.7	0.693	0.605	0.606	0.619	0.65	0.662	0.67			0.523143	0.435143	0.436143	0.449143	0.480143	0.492143	0.500143	0.473714	0.0129336
12:35:09	27.7	0.693	0.606	0.606	0.62	0.649	0.66	0.667			0.523	0.436	0.436	0.45	0.479	0.49	0.497	0.473	0.0126001
12:40:09	27.7	0.691	0.601	0.607	0.621	0.65	0.66	0.667			0.521429	0.431429	0.437429	0.451429	0.480429	0.490429	0.497429	0.472857	0.0126864
12:45:09	27.7	0.69	0.601	0.608	0.621	0.651	0.66	0.661			0.519429	0.430429	0.437429	0.450429	0.480429	0.489429	0.490429	0.471143	0.0122935
12:50:09	27.7	0.687	0.602	0.604	0.623	0.651	0.661	0.66			0.516	0.431	0.433	0.452	0.48	0.49	0.489	0.470143	0.0121409
12:55:09	27.7	0.689	0.603	0.606	0.623	0.651	0.661	0.661			0.519143	0.433143	0.436143	0.453143	0.481143	0.491143	0.491143	0.472143	0.0121401
13:00:09	27.7	0.687	0.605	0.607	0.62	0.652	0.663	0.661			0.517571	0.435571	0.437571	0.450571	0.482571	0.493571	0.491571	0.472714	0.0119571
13:05:09	27.7	0.683	0.599	0.603	0.618	0.647	0.662	0.659			0.512857	0.428857	0.432857	0.447857	0.476857	0.491857	0.488857	0.468571	0.0122138
13:10:09	27.7	0.689	0.606	0.608	0.623	0.652	0.662	0.662			0.519143	0.436143	0.438143	0.453143	0.482143	0.492143	0.492143	0.473286	0.0118652
13:15:09	27.7	0.688	0.606	0.609	0.624	0.651	0.663	0.662			0.518429	0.436429	0.439429	0.454429	0.481429	0.493429	0.492429	0.473714	0.0116858
13:20:09	27.7	0.688	0.608	0.608	0.624	0.652	0.661	0.663			0.519429	0.439429	0.439429	0.455429	0.483429	0.492429	0.494429	0.474857	0.0115879
13:25:09	27.7	0.689	0.61	0.609	0.623	0.652	0.662	0.662			0.522143	0.443143	0.442143	0.456143	0.485143	0.495143	0.495143	0.477	0.0115045
13:30:09	27.7	0.69	0.61	0.61	0.625	0.653	0.663	0.663			0.523714	0.443714	0.443714	0.458714	0.486714	0.496714	0.496714	0.478571	0.0115334
13:35:09	27.7	0.692	0.612	0.611	0.626	0.654	0.663	0.663			0.525571	0.445571	0.444571	0.459571	0.487571	0.496571	0.496571	0.479429	0.0114838
13:40:09	27.7	0.692	0.605	0.612	0.627	0.655	0.664	0.663			0.524857	0.437857	0.444857	0.459857	0.487857	0.496857	0.495857	0.478286	0.011958
13:45:09	27.7	0.69	0.607	0.613	0.626	0.653	0.663	0.662			0.522714	0.439714	0.445714	0.458714	0.485714	0.495714	0.494714	0.477571	0.0114755
13:50:09	27.7	0.69	0.608	0.605	0.627	0.653	0.665	0.663			0.522571	0.440571	0.437571	0.459571	0.485571	0.497571	0.495571	0.477	0.0120551
13:55:09	27.7	0.69	0.608	0.606	0.627	0.653	0.667	0.663			0.523429	0.441429	0.439429	0.460429	0.486429	0.500429	0.496429	0.478286	0.0120622
14:00:09	27.7	0.69	0.608	0.606	0.628	0.654	0.667	0.663			0.523	0.441	0.439	0.461	0.487	0.5	0.496	0.478143	0.0120444
14:05:09	27.7	0.689	0.607	0.606	0.625	0.653	0.667	0.661			0.521857	0.439857	0.438857	0.457857	0.485857	0.499857	0.493857	0.476857	0.0120495
14:10:09	27.7	0.688	0.61	0.608	0.626	0.655	0.668	0.662			0.521286	0.443286	0.441286	0.459286	0.488286	0.501286	0.495286	0.478571	0.0116715
14:15:09	27.7	0.689	0.611	0.609	0.626	0.652	0.669	0.66			0.523	0.445	0.443	0.46	0.486	0.503	0.494	0.479143	0.0115458
14:20:09	27.7	0.689	0.612	0.608	0.626	0.652	0.67	0.659			0.522429	0.445429	0.441429	0.459429	0.485429	0.503429	0.492429	0.478571	0.0115726
14:25:09	27.7	0.689	0.614	0.607	0.627	0.651	0.67	0.66			0.521857	0.446857	0.439857	0.459857	0.483857	0.502857	0.492857	0.478286	0.011495
14:30:09	27.7	0.689	0.615	0.608	0.628	0.652	0.67	0.659			0.524143	0.450143	0.443143	0.463143	0.487143	0.505143	0.494143	0.481	0.0112957
14:35:09	27.7	0.688	0.617	0.609	0.629	0.654	0.669	0.659			0.523	0.452	0.444	0.464	0.489	0.504	0.494	0.481429	0.0109367
14:40:09	27.7	0.688	0.617	0.609	0.629	0.653	0.67	0.659			0.525571	0.454571	0.446571	0.466571	0.490571	0.507571	0.496571	0.484	0.0109715
14:45:09	27.7	0.689	0.618	0.609	0.631	0.653	0.67	0.66			0.526	0.455	0.446	0.468	0.49	0.507	0.497	0.484143	0.0109532
14:50:09	27.7	0.689	0.618	0.609	0.63	0.653	0.671	0.659			0.525857	0.454857	0.445857	0.466857	0.489857	0.507857	0.495857	0.483857	0.011013
14:55:09	27.7	0.688	0.62	0.609	0.63	0.651	0.668	0.659			0.525429	0.457429	0.446429	0.467429	0.488429	0.505429	0.496429	0.483857	0.0106253
15:00:09	27.7	0.689	0.62	0.61	0.631	0.651	0.668	0.66			0.527429	0.458429	0.448429	0.469429	0.489429	0.506429	0.498429	0.485429	0.0106279
15:05:09	27.7	0.691	0.623	0.612	0.632	0.651	0.668	0.659			0.530143	0.462143	0.451143	0.471143	0.490143	0.507143	0.498143	0.487143	0.0104152
15:10:09	27.7	0.689	0.622	0.612	0.633	0.649	0.669	0.659			0.527571	0.460571	0.450571	0.471571	0.487571	0.507571	0.497571	0.486143	0.0102814
15:15:09	27.7	0.69	0.624	0.613	0.632	0.649	0.669	0.66			0.528571	0.462571	0.451571	0.470571	0.487571	0.507571	0.498571	0.486714	0.0102433
15:20:09	27.7	0.69	0.626	0.615	0.632	0.65	0.669	0.66			0.528857	0.464857	0.453857	0.470857	0.488857	0.507857	0.498857	0.487714	0.00997241
15:25:09	27.7	0.69	0.627	0.616	0.632	0.648	0.669	0.661			0.529	0.466	0.455	0.471	0.487	0.508	0.5	0.488	0.00986577
15:30:09	27.7	0.689	0.628	0.616	0.632	0.648	0.667	0.657			0.529286	0.468286	0.456286	0.472286	0.488286	0.507286	0.497286	0.488429	0.00951547
15:35:09	27.7	0.689	0.628	0.617	0.634	0.648	0.667	0.658			0.528714	0.467714	0.456714	0.473714	0.487714	0.506714	0.497714	0.488429	0.00938011
15:40:09	27.7	0.691	0.63	0.618	0.635	0.644	0.668	0.659			0.532	0.471	0.459	0.476	0.485	0.509	0.5	0.490286	0.00947104
15:45:09	27.7	0.69	0.62	0.619	0.635	0.644	0.668	0.66			0.532143	0.462143	0.461143	0.477143	0.486143	0.510143	0.502143	0.490143	0.0099019
15:50:09	27.7	0.688	0.619	0.614	0.635	0.641	0.668	0.659			0.532429	0.463429	0.458429	0.479429	0.485429	0.512429	0.503429	0.490714	0.0101365
15:55:09	27.7	0.688	0.62	0.613	0.636	0.641	0.669	0.656			0.532143	0.464143	0.457143	0.480143	0.485143	0.513143	0.500143	0.490286	0.0100982
16:00:09	27.7	0.687	0.618	0.614	0.636	0.64	0.67	0.656			0.530857	0.461857	0.457857	0.479857	0.483857	0.513857	0.499857	0.489714	0.0101194
16:05:09	27.7	0.688	0.62	0.614	0.637	0.641	0.67	0.655			0.531857	0.463857	0.457857	0.480857	0.484857	0.513857	0.498857	0.490286	0.0100306
16:10:09	27.7	0.686	0.62	0.614	0.636	0.64	0.671	0.655			0.529	0.463	0.457	0.479	0.483	0.514	0.498	0.489	0.00993071
16:15:09	27.7	0.684	0.622	0.615	0.637	0.64	0.672	0.655			0.526571	0.464571	0.457571	0.479571	0.482571	0.514571	0.497571	0.489	0.00957889
16:20:09	27.7	0.684	0.622	0.615	0.638	0.64	0.67	0.654			0.526	0.464	0.457	0.48	0.482	0.512	0.496	0.488143	0.00941232
16:25:09	27.7	0.682	0.624	0.615	0.638	0.641	0.67	0.655			0.524857	0.466857	0.457857	0.480857	0.483857	0.512857	0.497857	0.489286	0.00911006
16:30:09	27.7	0.682	0.624	0.615	0.638	0.641	0.67	0.655			0.526571	0.468571	0.459571	0.482571	0.485571	0.514571	0.499571	0.491	0.00911006
16:35:09	27.7	0.681	0.625	0.616	0.638	0.642	0.669	0.653			0.524571	0.468571	0.459571	0.481571	0.485571	0.512571	0.496571	0.489857	0.00876061
16:40:09	27.7	0.68	0.625	0.617	0.638	0.642	0.669	0.654			0.523571	0.468571	0.460571	0.481571	0.485571	0.512571	0.497571	0.49	0.0086047
16:45:09	27.7	0.679	0.625	0.617	0.639	0.642	0.668	0.654			0.521857	0.467857	0.459857	0.481857	0.484857	0.510857	0.496857	0.489143	0.00842817
16:50:09	27.7	0.679	0.625	0.618	0.64	0.642	0.669	0.655			0.521143	0.467143	0.460143	0.482143	0.484143	0.511143	0.497143	0.489	0.00841039
16:55:09	27.7	0.68	0.626	0.619	0.641	0.643	0.668	0.655			0.522	0.468	0.461	0.483	0.485	0.51	0.497	0.489429	0.00826599
17:00:09	27.6	0.68	0.627	0.619	0.641	0.643	0.667	0.656			0.522571	0.469571	0.461571	0.483571	0.485571	0.509571	0.498571	0.490143	0.00817038
17:05:09	27.6	0.68	0.628	0.621	0.643	0.641	0.668	0.656			0.522429	0.470429	0.463429	0.485429	0.483429	0.510429	0.498429	0.490571	0.00800425
17:10:09	27.6	0.682	0.629	0.62	0.643	0.641	0.669	0.657			0.526714	0.473714	0.464714	0.487714	0.485714	0.513714	0.501714	0.493429	0.00830007
17:15:09	27.7	0.679	0.629	0.621	0.643	0.641	0.669	0.658			0.523857	0.473857	0.465857	0.487857	0.485857	0.513857	0.502857	0.493429	0.00796378
17:20:09	27.6	0.68	0.631	0.622	0.644	0.641	0.669	0.659			0.525571	0.476571	0.467571	0.489571	0.486571	0.514571	0.504571	0.495	0.00787055
17:25:09	27.6	0.681	0.632	0.621	0.643	0.641	0.669	0.659			0.526571	0.477571	0.466571	0.488571	0.486571	0.514571	0.504571	0.495	0.00801147
17:30:09	27.7	0.682	0.632	0.623	0.643	0.642	0.67	0.66			0.527	0.477	0.468	0.488	0.487	0.515	0.505	0.495286	0.00800213
17:35:09	27.6	0.681	0.631	0.622	0.643	0.642	0.67	0.661			0.526714	0.476714	0.467714	0.488714	0.487714	0.515714	0.506714	0.495714	0.00807701
17:40:09	27.6	0.683	0.632	0.62	0.643	0.641	0.669	0.66			0.528143	0.477143	0.465143	0.488143	0.486143	0.514143	0.505143	0.494857	0.0083144
17:45:09	27.7	0.683	0.633	0.621	0.643	0.641	0.671	0.661			0.527714	0.477714	0.465714	0.487714	0.485714	0.515714	0.505714	0.495143	0.0083234
17:50:09	27.7	0.682	0.634	0.622	0.644	0.64	0.671	0.662			0.526286	0.478286	0.466286	0.488286	0.484286	0.515286	0.506286	0.495	0.00813784
17:55:09	27.6	0.682	0.634	0.622	0.644	0.64	0.671	0.663			0.526	0.478	0.466	0.488	0.484	0.515	0.507	0.494857	0.00817204
18:00:09	27.7	0.683	0.635	0.623	0.645	0.641	0.671	0.662			0.526571	0.478571	0.466571	0.488571	0.484571	0.514571	0.505571	0.495	0.00804706
18:05:09	27.6	0.683	0.634	0.624	0.645	0.641	0.671	0.663			0.526429	0.477429	0.467429	0.488429	0.484429	0.514429	0.506429	0.495	0.00804706
18:10:09	27.6	0.683	0.635	0.625	0.646	0.642	0.672	0.665			0.525857	0.477857	0.467857	0.488857	0.484857	0.514857	0.507857	0.495429	0.00799064
18:15:09	27.6	0.682	0.635	0.626	0.646	0.643	0.673	0.665			0.524429	0.477429	0.468429	0.488429	0.485429	0.515429	0.507429	0.495286	0.00784805
18:20:09	27.6	0.683	0.633	0.627	0.646	0.643	0.673	0.666			0.525143	0.475143	0.469143	0.488143	0.485143	0.515143	0.508143	0.495143	0.00800892
18:25:09	27.6	0.685	0.635	0.627	0.647	0.645	0.674	0.667			0.526714	0.476714	0.468714	0.488714	0.486714	0.515714	0.508714	0.496	0.0080909
18:30:09	27.6	0.685	0.635	0.627	0.648	0.645	0.673	0.663			0.526143	0.476143	0.468143	0.489143	0.486143	0.514143	0.504143	0.494857	0.00788221
18:35:09	27.6	0.684	0.635	0.627	0.643	0.644	0.673	0.664			0.525429	0.476429	0.468429	0.484429	0.485429	0.514429	0.505429	0.494286	0.0079625
18:40:09	27.7	0.684	0.636	0.628	0.643	0.645	0.672	0.662			0.524857	0.476857	0.468857	0.483857	0.485857	0.512857	0.502857	0.493714	0.00768557
18:45:09	27.7	0.684	0.637	0.628	0.644	0.645	0.673	0.662			0.525143	0.478143	0.469143	0.485143	0.486143	0.514143	0.503143	0.494429	0.00766474
18:50:09	27.6	0.684	0.638	0.629	0.645	0.646	0.674	0.663			0.524571	0.478571	0.469571	0.485571	0.486571	0.514571	0.503571	0.494714	0.00757008
18:55:09	27.7	0.685	0.64	0.63	0.646	0.647	0.674	0.664			0.525571	0.480571	0.470571	0.486571	0.487571	0.514571	0.504571	0.495714	0.00745919
19:00:09	27.6	0.685	0.641	0.631	0.646	0.647	0.674	0.664			0.525143	0.481143	0.471143	0.486143	0.487143	0.514143	0.504143	0.495571	0.00733179
19:05:09	27.6	0.685	0.64	0.631	0.644	0.648	0.675	0.665			0.528571	0.483571	0.474571	0.487571	0.491571	0.518571	0.508571	0.499	0.00751144
19:10:09	27.6	0.685	0.64	0.632	0.645	0.648	0.675	0.665			0.528286	0.483286	0.475286	0.488286	0.491286	0.518286	0.508286	0.499	0.00739921
19:15:09	27.6	0.682	0.638	0.63	0.645	0.647	0.674	0.666			0.526143	0.482143	0.474143	0.489143	0.491143	0.518143	0.510143	0.498714	0.00738034
19:20:09	27.6	0.685	0.643	0.634	0.646	0.649	0.675	0.666			0.528714	0.486714	0.477714	0.489714	0.492714	0.518714	0.509714	0.500571	0.00706914
19:25:09	27.6	0.682	0.639	0.624	0.644	0.647	0.675	0.666			0.525286	0.482286	0.467286	0.487286	0.490286	0.518286	0.509286	0.497143	0.00793254
19:30:09	27.6	0.686	0.642	0.628	0.646	0.65	0.677	0.667			0.530143	0.486143	0.472143	0.490143	0.494143	0.521143	0.511143	0.500714	0.00783113
19:35:09	27.6	0.687	0.644	0.629	0.645	0.65	0.678	0.666			0.530857	0.487857	0.472857	0.488857	0.493857	0.521857	0.509857	0.500857	0.00781939
19:40:09	27.6	0.687	0.645	0.63	0.645	0.651	0.679	0.667			0.530714	0.488714	0.473714	0.488714	0.494714	0.522714	0.510714	0.501429	0.00776658
19:45:09	27.6	0.686	0.644	0.629	0.645	0.651	0.679	0.666			0.529714	0.487714	0.472714	0.488714	0.494714	0.522714	0.509714	0.500857	0.00777489
19:50:09	27.6	0.687	0.646	0.63	0.646	0.651	0.681	0.667			0.531571	0.490571	0.474571	0.490571	0.495571	0.525571	0.511571	0.502857	0.00782461
19:55:09	27.6	0.688	0.647	0.631	0.646	0.651	0.681	0.667			0.532857	0.491857	0.475857	0.490857	0.495857	0.525857	0.511857	0.503571	0.00779106
20:00:09	27.7	0.689	0.647	0.631	0.647	0.652	0.68	0.668			0.533571	0.491571	0.475571	0.491571	0.496571	0.524571	0.512571	0.503714	0.00778102
20:05:09	27.6	0.685	0.648	0.632	0.647	0.653	0.679	0.668			0.529286	0.492286	0.476286	0.491286	0.497286	0.523286	0.512286	0.503143	0.00721582
20:10:09	27.6	0.686	0.648	0.633	0.647	0.653	0.68	0.669			0.530143	0.492143	0.477143	0.491143	0.497143	0.524143	0.513143	0.503571	0.00731228
20:15:09	27.6	0.685	0.648	0.633	0.648	0.653	0.681	0.67			0.528429	0.491429	0.476429	0.491429	0.496429	0.524429	0.513429	0.503143	0.00728898
20:20:09	27.6	0.686	0.648	0.634	0.649	0.654	0.679	0.67			0.529286	0.491286	0.477286	0.492286	0.497286	0.522286	0.513286	0.503286	0.0070946
20:25:09	27.6	0.688	0.648	0.635	0.643	0.655	0.678	0.67			0.531143	0.491143	0.478143	0.486143	0.498143	0.521143	0.513143	0.502714	0.00738356
20:30:09	27.6	0.689	0.649	0.637	0.643	0.655	0.68	0.671			0.531571	0.491571	0.479571	0.485571	0.497571	0.522571	0.513571	0.503143	0.00743818
20:35:09	27.6	0.69	0.648	0.637	0.643	0.653	0.68	0.671			0.533143	0.491143	0.480143	0.486143	0.496143	0.523143	0.514143	0.503429	0.00760862
20:40:09	27.7	0.688	0.649	0.638	0.644	0.654	0.68	0.672			0.530857	0.491857	0.480857	0.486857	0.496857	0.522857	0.514857	0.503571	0.00727263
20:45:09	27.6	0.689	0.651	0.639	0.644	0.655	0.681	0.672			0.533571	0.495571	0.483571	0.488571	0.499571	0.525571	0.516571	0.506143	0.00725671
20:50:09	27.6	0.687	0.648	0.637	0.644	0.654	0.682	0.673			0.532857	0.493857	0.482857	0.489857	0.499857	0.527857	0.518857	0.506571	0.00746967
20:55:09	27.6	0.686	0.645	0.641	0.646	0.655	0.682	0.674			0.532714	0.491714	0.487714	0.492714	0.501714	0.528714	0.520714	0.508	0.00715713
21:00:09	27.6	0.686	0.646	0.641	0.646	0.654	0.682	0.671			0.535857	0.495857	0.490857	0.495857	0.503857	0.531857	0.520857	0.510714	0.00701165
21:05:09	27.6	0.687	0.648	0.642	0.644	0.655	0.682	0.673			0.536857	0.497857	0.491857	0.493857	0.504857	0.531857	0.522857	0.511429	0.00709412
21:10:09	27.6	0.684	0.649	0.644	0.644	0.654	0.684	0.673			0.535571	0.500571	0.495571	0.495571	0.505571	0.535571	0.524571	0.513286	0.00684771
21:15:09	27.6	0.684	0.65	0.644	0.644	0.656	0.684	0.674			0.535571	0.501571	0.495571	0.495571	0.507571	0.535571	0.525571	0.513857	0.00679536
21:20:09	27.6	0.683	0.65	0.645	0.645	0.657	0.685	0.674			0.534143	0.501143	0.496143	0.496143	0.508143	0.536143	0.525143	0.513857	0.00665015
21:25:09	27.6	0.683	0.651	0.646	0.646	0.659	0.685	0.674			0.533714	0.501714	0.496714	0.496714	0.509714	0.535714	0.524714	0.514143	0.00643967
21:30:09	27.6	0.684	0.652	0.647	0.646	0.659	0.686	0.673			0.534429	0.502429	0.497429	0.496429	0.509429	0.536429	0.523429	0.514286	0.00644917
21:35:09	27.6	0.684	0.652	0.647	0.647	0.66	0.687	0.674			0.534714	0.502714	0.497714	0.497714	0.510714	0.537714	0.524714	0.515143	0.00648389
21:40:09	27.6	0.681	0.653	0.648	0.648	0.661	0.687	0.674			0.531714	0.503714	0.498714	0.498714	0.511714	0.537714	0.524714	0.515286	0.00609003
21:45:09	27.6	0.683	0.655	0.651	0.648	0.661	0.688	0.674			0.533429	0.505429	0.501429	0.498429	0.511429	0.538429	0.524429	0.516143	0.00603843
21:50:09	27.6	0.683	0.655	0.651	0.649	0.662	0.69	0.675			0.533	0.505	0.501	0.499	0.512	0.54	0.525	0.516429	0.00616386
21:55:09	27.6	0.683	0.656	0.652	0.649	0.662	0.69	0.676			0.532714	0.505714	0.501714	0.498714	0.511714	0.539714	0.525714	0.516571	0.00609617
22:00:09	27.6	0.683	0.657	0.652	0.65	0.662	0.69	0.677			0.532714	0.506714	0.501714	0.499714	0.511714	0.539714	0.526714	0.517	0.00602263
22:05:09	27.6	0.684	0.658	0.652	0.651	0.663	0.691	0.678			0.533143	0.507143	0.501143	0.500143	0.512143	0.540143	0.527143	0.517286	0.00608444
22:10:09	27.6	0.685	0.659	0.654	0.653	0.662	0.692	0.674			0.534143	0.508143	0.503143	0.502143	0.511143	0.541143	0.523143	0.517571	0.00585075
22:15:09	27.6	0.682	0.66	0.655	0.653	0.663	0.693	0.674			0.530429	0.508429	0.503429	0.501429	0.511429	0.541429	0.522429	0.517	0.00564361
22:20:09	27.6	0.682	0.658	0.656	0.654	0.662	0.694	0.675			0.532429	0.508429	0.506429	0.504429	0.512429	0.544429	0.525429	0.519143	0.00575994
22:25:09	27.6	0.684	0.657	0.656	0.654	0.664	0.695	0.676			0.534429	0.507429	0.506429	0.504429	0.514429	0.545429	0.526429	0.519857	0.00599943
22:30:09	27.6	0.683	0.658	0.656	0.653	0.664	0.695	0.675			0.533143	0.508143	0.506143	0.503143	0.514143	0.545143	0.525143	0.519286	0.00593388
22:35:09	27.6	0.684	0.659	0.653	0.654	0.665	0.695	0.676			0.536	0.511	0.505	0.506	0.517	0.547	0.528	0.521429	0.00606652
22:40:09	27.6	0.684	0.659	0.652	0.656	0.665	0.695	0.675			0.535571	0.510571	0.503571	0.507571	0.516571	0.546571	0.526571	0.521	0.00599546
22:45:09	27.6	0.686	0.66	0.652	0.656	0.665	0.696	0.674			0.537286	0.511286	0.503286	0.507286	0.516286	0.547286	0.525286	0.521143	0.00615834
22:50:09	27.6	0.686	0.66	0.652	0.656	0.665	0.696	0.674			0.537	0.511	0.503	0.507	0.516	0.547	0.525	0.520857	0.00615834
22:55:09	27.6	0.684	0.66	0.653	0.657	0.666	0.697	0.673			0.535	0.511	0.504	0.508	0.517	0.548	0.524	0.521	0.00599206
23:00:09	27.6	0.685	0.662	0.654	0.656	0.668	0.696	0.673			0.535714	0.512714	0.504714	0.506714	0.518714	0.546714	0.523714	0.521286	0.00583037
23:05:09	27.6	0.686	0.663	0.655	0.657	0.669	0.697	0.673			0.536429	0.513429	0.505429	0.507429	0.519429	0.547429	0.523429	0.521857	0.0058222
23:10:09	27.6	0.687	0.662	0.653	0.658	0.669	0.697	0.674			0.538429	0.513429	0.504429	0.509429	0.520429	0.548429	0.525429	0.522857	0.00601133
23:15:09	27.6	0.687	0.664	0.654	0.659	0.669	0.698	0.674			0.538571	0.515571	0.505571	0.510571	0.520571	0.549571	0.525571	0.523714	0.0059178
23:20:09	27.6	0.688	0.665	0.655	0.66	0.667	0.699	0.675			0.541143	0.518143	0.508143	0.513143	0.520143	0.552143	0.528143	0.525857	0.00597102
23:25:09	27.6	0.689	0.663	0.654	0.66	0.666	0.698	0.675			0.541857	0.515857	0.506857	0.512857	0.518857	0.550857	0.527857	0.525	0.00609226
23:30:09	27.6	0.689	0.664	0.655	0.661	0.666	0.697	0.676			0.541429	0.516429	0.507429	0.513429	0.518429	0.549429	0.528429	0.525	0.00585075
23:35:09	27.6	0.69	0.665	0.646	0.661	0.666	0.698	0.676			0.545	0.52	0.501	0.516	0.521	0.553	0.531	0.526714	0.00672137
23:40:09	27.6	0.691	0.666	0.647	0.661	0.666	0.699	0.678			0.546286	0.521286	0.502286	0.516286	0.521286	0.554286	0.533286	0.527857	0.00679936
23:45:09	27.6	0.69	0.666	0.647	0.662	0.667	0.699	0.678			0.545143	0.521143	0.502143	0.517143	0.522143	0.554143	0.533143	0.527857	0.00667516
23:50:09	27.6	0.691	0.667	0.648	0.663	0.668	0.701	0.679			0.546429	0.522429	0.503429	0.518429	0.523429	0.556429	0.534429	0.529286	0.00676978
23:55:09	27.6	0.69	0.668	0.645	0.664	0.668	0.701	0.68			0.545	0.523	0.5	0.519	0.523	0.556	0.535	0.528714	0.00695809
1 day, 0:00:09	27.6	0.691	0.669	0.646	0.664	0.669	0.702	0.68			0.545714	0.523714	0.500714	0.518714	0.523714	0.556714	0.534714	0.529143	0.00697225
1 day, 0:05:09	27.6	0.692	0.67	0.647	0.665	0.67	0.702	0.681			0.546429	0.524429	0.501429	0.519429	0.524429	0.556429	0.535429	0.529714	0.00687893
1 day, 0:10:09	27.6	0.693	0.67	0.647	0.666	0.67	0.699	0.681			0.547286	0.524286	0.501286	0.520286	0.524286	0.553286	0.535286	0.529429	0.00663838
1 day, 0:15:09	27.6	0.694	0.672	0.648	0.667	0.671	0.7	0.683			0.550857	0.528857	0.504857	0.523857	0.527857	0.556857	0.539857	0.533286	0.0066435
1 day, 0:20:09	27.6	0.694	0.672	0.648	0.667	0.671	0.7	0.681			0.550857	0.528857	0.504857	0.523857	0.527857	0.556857	0.537857	0.533	0.00660241
1 day, 0:25:09	27.6	0.695	0.673	0.648	0.667	0.672	0.7	0.681			0.551571	0.529571	0.504571	0.523571	0.528571	0.556571	0.537571	0.533143	0.00663633
1 day, 0:30:09	27.6	0.696	0.674	0.649	0.667	0.672	0.701	0.681			0.552429	0.530429	0.505429	0.523429	0.528429	0.557429	0.537429	0.533571	0.00667415
1 day, 0:35:09	27.6	0.697	0.675	0.649	0.668	0.67	0.7	0.68			0.557857	0.535857	0.509857	0.528857	0.530857	0.560857	0.540857	0.537857	0.00664759
1 day, 0:40:09	27.6	0.697	0.676	0.649	0.668	0.67	0.696	0.68			0.557714	0.536714	0.509714	0.528714	0.530714	0.556714	0.540714	0.537286	0.00633154
1 day, 0:45:09	27.6	0.697	0.677	0.65	0.669	0.67	0.697	0.681			0.557143	0.537143	0.510143	0.529143	0.530143	0.557143	0.541143	0.537429	0.00628193
1 day, 0:50:09	27.6	0.697	0.677	0.651	0.669	0.671	0.698	0.682			0.557	0.537	0.511	0.529	0.531	0.558	0.542	0.537857	0.00624282
1 day, 0:55:09	27.6	0.698	0.677	0.652	0.669	0.671	0.698	0.681			0.557571	0.536571	0.511571	0.528571	0.530571	0.557571	0.540571	0.537571	0.00620292
1 day, 1:00:09	27.7	0.698	0.679	0.653	0.67	0.669	0.697	0.68			0.557571	0.538571	0.512571	0.529571	0.528571	0.556571	0.539571	0.537571	0.00604743

## Sheet: KB_SBW25-eWT
Time	T° 600	B8	B10	D7	D9	D11	F8	F10		raw data - medium control mean	B8	b10	D7	D9	D11	F8	F10	Mean	SE
00:00:09	27.1	0.136	0.554	0.225	0.125	0.26	0.15	0.206			0.0192857	0.437286	0.108286	0.00828571	0.143286	0.0332857	0.0892857	0.119857	0.0561536
00:05:09	27.2	0.155	0.536	0.22	0.127	0.233	0.166	0.209			0.0382857	0.419286	0.103286	0.0102857	0.116286	0.0492857	0.0922857	0.118429	0.0521744
00:10:09	27.2	0.153	0.525	0.217	0.131	0.224	0.173	0.212			0.0361429	0.408143	0.100143	0.0141429	0.107143	0.0561429	0.0951429	0.116714	0.0503426
00:15:09	27.3	0.154	0.522	0.218	0.136	0.221	0.175	0.214			0.0372857	0.405286	0.101286	0.0192857	0.104286	0.0582857	0.0972857	0.117571	0.0495824
00:20:09	27.3	0.16	0.518	0.218	0.142	0.221	0.178	0.216			0.0432857	0.401286	0.101286	0.0252857	0.104286	0.0612857	0.0992857	0.119429	0.0484151
00:25:09	27.3	0.169	0.517	0.217	0.146	0.22	0.18	0.217			0.0522857	0.400286	0.100286	0.0292857	0.103286	0.0632857	0.100286	0.121286	0.0477184
00:30:09	27.3	0.175	0.517	0.217	0.149	0.22	0.18	0.217			0.0582857	0.400286	0.100286	0.0322857	0.103286	0.0632857	0.100286	0.122571	0.0473813
00:35:09	27.4	0.177	0.513	0.218	0.151	0.219	0.18	0.218			0.0604286	0.396429	0.101429	0.0344286	0.102429	0.0634286	0.101429	0.122857	0.0466562
00:40:09	27.4	0.181	0.509	0.22	0.153	0.219	0.179	0.218			0.0644286	0.392429	0.103429	0.0364286	0.102429	0.0624286	0.101429	0.123286	0.0458924
00:45:09	27.4	0.185	0.505	0.223	0.154	0.22	0.178	0.217			0.0687143	0.388714	0.106714	0.0377143	0.103714	0.0617143	0.100714	0.124	0.0451736
00:50:09	27.5	0.187	0.504	0.228	0.156	0.22	0.179	0.217			0.0704286	0.387429	0.111429	0.0394286	0.103429	0.0624286	0.100429	0.125	0.0448112
00:55:09	27.5	0.189	0.502	0.231	0.157	0.221	0.18	0.219			0.0724286	0.385429	0.114429	0.0404286	0.104429	0.0634286	0.102429	0.126143	0.0443378
01:00:09	27.5	0.188	0.498	0.23	0.158	0.224	0.181	0.219			0.0712857	0.381286	0.113286	0.0412857	0.107286	0.0642857	0.102286	0.125857	0.0437046
01:05:09	27.5	0.186	0.492	0.23	0.16	0.227	0.185	0.221			0.0688571	0.374857	0.112857	0.0428571	0.109857	0.0678571	0.103857	0.125857	0.0426536
01:10:09	27.5	0.185	0.488	0.23	0.163	0.231	0.189	0.224			0.0672857	0.370286	0.112286	0.0452857	0.113286	0.0712857	0.106286	0.126571	0.0417953
01:15:09	27.5	0.189	0.484	0.23	0.168	0.23	0.193	0.227			0.07	0.365	0.111	0.049	0.111	0.074	0.108	0.126857	0.0407252
01:20:09	27.5	0.194	0.479	0.232	0.176	0.231	0.196	0.231			0.074	0.359	0.112	0.056	0.111	0.076	0.111	0.128429	0.0393391
01:25:09	27.5	0.203	0.472	0.235	0.186	0.232	0.197	0.235			0.0814286	0.350429	0.113429	0.0644286	0.110429	0.0754286	0.113429	0.129857	0.0375302
01:30:09	27.5	0.21	0.466	0.239	0.197	0.234	0.198	0.239			0.0872857	0.343286	0.116286	0.0742857	0.111286	0.0752857	0.116286	0.132	0.0358938
01:35:09	27.5	0.216	0.46	0.242	0.209	0.235	0.199	0.245			0.092	0.336	0.118	0.085	0.111	0.075	0.121	0.134	0.034297
01:40:09	27.5	0.222	0.453	0.245	0.217	0.236	0.201	0.251			0.097	0.328	0.12	0.092	0.111	0.076	0.126	0.135714	0.0326968
01:45:09	27.5	0.226	0.446	0.248	0.223	0.239	0.204	0.257			0.0997143	0.319714	0.121714	0.0967143	0.112714	0.0777143	0.130714	0.137	0.0311584
01:50:09	27.5	0.23	0.438	0.252	0.231	0.242	0.206	0.261			0.102286	0.310286	0.124286	0.103286	0.114286	0.0782857	0.133286	0.138	0.0294802
01:55:09	27.5	0.238	0.43	0.255	0.239	0.245	0.208	0.267			0.108857	0.300857	0.125857	0.109857	0.115857	0.0788571	0.137857	0.139714	0.0277226
02:00:09	27.5	0.233	0.423	0.258	0.245	0.248	0.21	0.269			0.102857	0.292857	0.127857	0.114857	0.117857	0.0798571	0.138857	0.139286	0.0265607
02:05:09	27.5	0.238	0.416	0.263	0.25	0.252	0.213	0.272			0.106714	0.284714	0.131714	0.118714	0.120714	0.0817143	0.140714	0.140714	0.0250419
02:10:09	27.5	0.24	0.409	0.266	0.255	0.256	0.216	0.274			0.107143	0.276143	0.133143	0.122143	0.123143	0.0831429	0.141143	0.140857	0.0236509
02:15:09	27.5	0.245	0.403	0.271	0.26	0.26	0.219	0.276			0.111	0.269	0.137	0.126	0.126	0.085	0.142	0.142286	0.0222943
02:20:09	27.5	0.25	0.398	0.276	0.264	0.263	0.222	0.279			0.114857	0.262857	0.140857	0.128857	0.127857	0.0868571	0.143857	0.143714	0.0211237
02:25:09	27.5	0.254	0.393	0.281	0.268	0.266	0.226	0.282			0.117857	0.256857	0.144857	0.131857	0.129857	0.0898571	0.145857	0.145286	0.0199354
02:30:09	27.5	0.259	0.388	0.285	0.275	0.269	0.23	0.284			0.121857	0.250857	0.147857	0.137857	0.131857	0.0928571	0.146857	0.147143	0.018685
02:35:09	27.5	0.265	0.385	0.292	0.282	0.271	0.235	0.286			0.126429	0.246429	0.153429	0.143429	0.132429	0.0964286	0.147429	0.149429	0.0176554
02:40:09	27.5	0.272	0.383	0.297	0.287	0.274	0.238	0.29			0.132429	0.243429	0.157429	0.147429	0.134429	0.0984286	0.150429	0.152	0.0168846
02:45:09	27.5	0.278	0.38	0.302	0.292	0.277	0.243	0.292			0.137286	0.239286	0.161286	0.151286	0.136286	0.102286	0.151286	0.154143	0.0158931
02:50:09	27.5	0.283	0.378	0.308	0.296	0.28	0.248	0.295			0.141143	0.236143	0.166143	0.154143	0.138143	0.106143	0.153143	0.156429	0.0150882
02:55:09	27.5	0.29	0.377	0.315	0.301	0.283	0.252	0.297			0.146857	0.233857	0.171857	0.157857	0.139857	0.108857	0.153857	0.159	0.0144954
03:00:09	27.5	0.296	0.375	0.32	0.305	0.288	0.256	0.3			0.151714	0.230714	0.175714	0.160714	0.143714	0.111714	0.155714	0.161429	0.0137299
03:05:09	27.5	0.302	0.374	0.327	0.31	0.292	0.262	0.305			0.156714	0.228714	0.181714	0.164714	0.146714	0.116714	0.159714	0.165	0.0130031
03:10:09	27.5	0.308	0.374	0.333	0.314	0.296	0.267	0.307			0.161429	0.227429	0.186429	0.167429	0.149429	0.120429	0.160429	0.167571	0.0125156
03:15:09	27.5	0.314	0.374	0.339	0.319	0.302	0.273	0.308			0.166429	0.226429	0.191429	0.171429	0.154429	0.125429	0.160429	0.170857	0.0119261
03:20:09	27.6	0.319	0.373	0.344	0.323	0.306	0.278	0.311			0.17	0.224	0.195	0.174	0.157	0.129	0.162	0.173	0.0113473
03:25:09	27.6	0.329	0.377	0.351	0.329	0.314	0.285	0.315			0.179143	0.227143	0.201143	0.179143	0.164143	0.135143	0.165143	0.178714	0.0110666
03:30:09	27.6	0.352	0.376	0.357	0.332	0.317	0.289	0.318			0.200714	0.224714	0.205714	0.180714	0.165714	0.137714	0.166714	0.183143	0.011116
03:35:09	27.6	0.339	0.38	0.361	0.34	0.325	0.295	0.322			0.186429	0.227429	0.208429	0.187429	0.172429	0.142429	0.169429	0.184857	0.0104309
03:40:09	27.6	0.358	0.382	0.371	0.343	0.328	0.3	0.325			0.204	0.228	0.217	0.189	0.174	0.146	0.171	0.189857	0.0108264
03:45:09	27.6	0.358	0.387	0.376	0.35	0.335	0.303	0.329			0.203	0.232	0.221	0.195	0.18	0.148	0.174	0.193286	0.0108709
03:50:09	27.6	0.368	0.39	0.381	0.354	0.341	0.307	0.334			0.212	0.234	0.225	0.198	0.185	0.151	0.178	0.197571	0.0109084
03:55:09	27.6	0.379	0.39	0.386	0.359	0.346	0.313	0.338			0.221714	0.232714	0.228714	0.201714	0.188714	0.155714	0.180714	0.201429	0.0107076
04:00:09	27.6	0.388	0.395	0.39	0.363	0.35	0.318	0.342			0.229286	0.236286	0.231286	0.204286	0.191286	0.159286	0.183286	0.205	0.0109212
04:05:09	27.6	0.396	0.395	0.396	0.368	0.355	0.32	0.347			0.236143	0.235143	0.236143	0.208143	0.195143	0.160143	0.187143	0.208286	0.0111386
04:10:09	27.6	0.403	0.397	0.402	0.372	0.36	0.325	0.351			0.242143	0.236143	0.241143	0.211143	0.199143	0.164143	0.190143	0.212	0.0112068
04:15:09	27.6	0.406	0.399	0.409	0.378	0.365	0.33	0.355			0.244	0.237	0.247	0.216	0.203	0.168	0.193	0.215429	0.0111117
04:20:09	27.6	0.415	0.397	0.419	0.383	0.37	0.335	0.358			0.251714	0.233714	0.255714	0.219714	0.206714	0.171714	0.194714	0.219143	0.0115591
04:25:09	27.6	0.423	0.4	0.426	0.393	0.377	0.341	0.361			0.258857	0.235857	0.261857	0.228857	0.212857	0.176857	0.196857	0.224571	0.0118457
04:30:09	27.6	0.43	0.402	0.427	0.399	0.382	0.347	0.365			0.264429	0.236429	0.261429	0.233429	0.216429	0.181429	0.199429	0.227571	0.0116116
04:35:09	27.6	0.435	0.406	0.429	0.406	0.387	0.351	0.369			0.268	0.239	0.262	0.239	0.22	0.184	0.202	0.230571	0.0115755
04:40:09	27.6	0.439	0.409	0.43	0.418	0.395	0.356	0.374			0.271	0.241	0.262	0.25	0.227	0.188	0.206	0.235	0.0113389
04:45:09	27.6	0.443	0.42	0.434	0.421	0.401	0.362	0.377			0.274	0.251	0.265	0.252	0.232	0.193	0.208	0.239286	0.0112752
04:50:09	27.6	0.447	0.422	0.438	0.43	0.405	0.366	0.381			0.277	0.252	0.268	0.26	0.235	0.196	0.211	0.242714	0.0113886
04:55:09	27.6	0.45	0.423	0.445	0.436	0.408	0.372	0.384			0.279	0.252	0.274	0.265	0.237	0.201	0.213	0.245857	0.0114068
05:00:09	27.6	0.456	0.425	0.452	0.443	0.414	0.378	0.389			0.283714	0.252714	0.279714	0.270714	0.241714	0.205714	0.216714	0.250143	0.0115405
05:05:09	27.6	0.466	0.429	0.46	0.446	0.418	0.387	0.392			0.293857	0.256857	0.287857	0.273857	0.245857	0.214857	0.219857	0.256143	0.0118215
05:10:09	27.6	0.47	0.43	0.469	0.452	0.42	0.394	0.398			0.297286	0.257286	0.296286	0.279286	0.247286	0.221286	0.225286	0.260571	0.0119018
05:15:09	27.6	0.476	0.431	0.486	0.456	0.427	0.402	0.402			0.303	0.258	0.313	0.283	0.254	0.229	0.229	0.267	0.0127298
05:20:09	27.6	0.483	0.437	0.505	0.462	0.432	0.408	0.402			0.309429	0.263429	0.331429	0.288429	0.258429	0.234429	0.228429	0.273429	0.0144387
05:25:09	27.6	0.492	0.439	0.576	0.462	0.437	0.414	0.406			0.317571	0.264571	0.401571	0.287571	0.262571	0.239571	0.231571	0.286429	0.0220826
05:30:09	27.6	0.505	0.443	0.629	0.467	0.445	0.422	0.413			0.329286	0.267286	0.453286	0.291286	0.269286	0.246286	0.237286	0.299143	0.0281395
05:35:09	27.6	0.518	0.448	0.677	0.474	0.452	0.432	0.418			0.342143	0.272143	0.501143	0.298143	0.276143	0.256143	0.242143	0.312571	0.0337172
05:40:09	27.6	0.531	0.455	0.69	0.483	0.459	0.455	0.425			0.354571	0.278571	0.513571	0.306571	0.282571	0.278571	0.248571	0.323286	0.0340537
05:45:09	27.6	0.558	0.463	0.692	0.493	0.473	0.484	0.431			0.380286	0.285286	0.514286	0.315286	0.295286	0.306286	0.253286	0.335714	0.033141
05:50:09	27.6	0.606	0.473	0.698	0.498	0.482	0.544	0.438			0.428	0.295	0.52	0.32	0.304	0.366	0.26	0.356143	0.0341972
05:55:09	27.6	0.675	0.483	0.701	0.506	0.545	0.602	0.447			0.497	0.305	0.523	0.328	0.367	0.424	0.269	0.387571	0.0366748
06:00:09	27.6	0.673	0.49	0.706	0.524	0.608	0.643	0.452			0.494286	0.311286	0.527286	0.345286	0.429286	0.464286	0.273286	0.406429	0.0367465
06:05:09	27.6	0.668	0.498	0.7	0.541	0.646	0.641	0.464			0.489286	0.319286	0.521286	0.362286	0.467286	0.462286	0.285286	0.415286	0.0346925
06:10:09	27.6	0.677	0.504	0.699	0.613	0.652	0.653	0.481			0.498	0.325	0.52	0.434	0.473	0.474	0.302	0.432286	0.0323292
06:15:09	27.6	0.68	0.515	0.693	0.678	0.669	0.667	0.526			0.500714	0.335714	0.513714	0.498714	0.489714	0.487714	0.346714	0.453286	0.0291375
06:20:09	27.6	0.68	0.537	0.688	0.704	0.67	0.66	0.575			0.500143	0.357143	0.508143	0.524143	0.490143	0.480143	0.395143	0.465	0.0238891
06:25:09	27.6	0.68	0.604	0.686	0.714	0.672	0.657	0.619			0.499143	0.423143	0.505143	0.533143	0.491143	0.476143	0.438143	0.480857	0.0145908
06:30:08	27.6	0.677	0.657	0.686	0.716	0.671	0.648	0.649			0.495429	0.475429	0.504429	0.534429	0.489429	0.466429	0.467429	0.490429	0.00911305
06:35:09	27.6	0.671	0.688	0.68	0.715	0.659	0.64	0.66			0.489143	0.506143	0.498143	0.533143	0.477143	0.458143	0.478143	0.491429	0.00912275
06:40:09	27.6	0.667	0.709	0.678	0.719	0.656	0.634	0.663			0.485714	0.527714	0.496714	0.537714	0.474714	0.452714	0.481714	0.493857	0.0112872
06:45:09	27.6	0.664	0.709	0.677	0.72	0.652	0.63	0.669			0.482286	0.527286	0.495286	0.538286	0.470286	0.448286	0.487286	0.492714	0.0118459
06:50:09	27.6	0.662	0.706	0.675	0.715	0.646	0.626	0.662			0.479286	0.523286	0.492286	0.532286	0.463286	0.443286	0.479286	0.487571	0.0119378
06:55:09	27.6	0.661	0.718	0.674	0.711	0.642	0.621	0.669			0.478	0.535	0.491	0.528	0.459	0.438	0.486	0.487857	0.0131501
07:00:09	27.6	0.659	0.713	0.675	0.708	0.64	0.618	0.667			0.476	0.53	0.492	0.525	0.457	0.435	0.484	0.485571	0.0129447
07:05:09	27.6	0.656	0.706	0.674	0.704	0.638	0.613	0.663			0.472571	0.522571	0.490571	0.520571	0.454571	0.429571	0.479571	0.481429	0.012725
07:10:09	27.6	0.657	0.708	0.675	0.703	0.636	0.611	0.66			0.473714	0.524714	0.491714	0.519714	0.452714	0.427714	0.476714	0.481	0.0131252
07:15:09	27.6	0.657	0.699	0.672	0.701	0.632	0.61	0.656			0.474857	0.516857	0.489857	0.518857	0.449857	0.427857	0.473857	0.478857	0.0125812
07:20:09	27.6	0.655	0.69	0.672	0.698	0.63	0.61	0.654			0.472429	0.507429	0.489429	0.515429	0.447429	0.427429	0.471429	0.475857	0.0118841
07:25:09	27.6	0.655	0.687	0.672	0.695	0.627	0.608	0.652			0.472143	0.504143	0.489143	0.512143	0.444143	0.425143	0.469143	0.473714	0.01185
07:30:09	27.6	0.653	0.684	0.672	0.692	0.625	0.608	0.65			0.470429	0.501429	0.489429	0.509429	0.442429	0.425429	0.467429	0.472286	0.0115849
07:35:09	27.6	0.653	0.68	0.672	0.689	0.625	0.607	0.647			0.469857	0.496857	0.488857	0.505857	0.441857	0.423857	0.463857	0.470143	0.0112561
07:40:09	27.6	0.653	0.677	0.672	0.688	0.623	0.609	0.64			0.469	0.493	0.488	0.504	0.439	0.425	0.456	0.467714	0.0110792
07:45:09	27.6	0.652	0.668	0.671	0.687	0.621	0.609	0.638			0.467714	0.483714	0.486714	0.502714	0.436714	0.424714	0.453714	0.465143	0.0106924
07:50:09	27.6	0.653	0.668	0.673	0.688	0.621	0.609	0.638			0.468429	0.483429	0.488429	0.503429	0.436429	0.424429	0.453429	0.465429	0.0108803
07:55:09	27.6	0.654	0.665	0.672	0.686	0.621	0.609	0.638			0.469143	0.480143	0.487143	0.501143	0.436143	0.424143	0.453143	0.464429	0.0105598
08:00:09	27.6	0.652	0.663	0.673	0.687	0.617	0.609	0.636			0.468286	0.479286	0.489286	0.503286	0.433286	0.425286	0.452286	0.464429	0.0109249
08:05:09	27.6	0.652	0.66	0.673	0.684	0.615	0.606	0.632			0.467571	0.475571	0.488571	0.499571	0.430571	0.421571	0.447571	0.461571	0.0110862
08:10:09	27.6	0.652	0.66	0.674	0.683	0.617	0.606	0.632			0.466857	0.474857	0.488857	0.497857	0.431857	0.420857	0.446857	0.461143	0.0109343
08:15:09	27.6	0.653	0.658	0.673	0.684	0.617	0.607	0.631			0.467571	0.472571	0.487571	0.498571	0.431571	0.421571	0.445571	0.460714	0.0108593
08:20:09	27.6	0.654	0.659	0.674	0.684	0.614	0.608	0.631			0.468	0.473	0.488	0.498	0.428	0.422	0.445	0.460286	0.011077
08:25:09	27.6	0.656	0.656	0.673	0.683	0.614	0.606	0.631			0.470286	0.470286	0.487286	0.497286	0.428286	0.420286	0.445286	0.459857	0.0110687
08:30:09	27.6	0.653	0.655	0.669	0.68	0.614	0.605	0.63			0.467429	0.469429	0.483429	0.494429	0.428429	0.419429	0.444429	0.458143	0.0106228
08:35:09	27.6	0.653	0.655	0.67	0.68	0.613	0.605	0.629			0.468714	0.470714	0.485714	0.495714	0.428714	0.420714	0.444714	0.459286	0.0107789
08:40:09	27.7	0.652	0.656	0.671	0.681	0.614	0.605	0.629			0.466857	0.470857	0.485857	0.495857	0.428857	0.419857	0.443857	0.458857	0.0108584
08:45:09	27.7	0.651	0.656	0.67	0.679	0.613	0.606	0.629			0.466143	0.471143	0.485143	0.494143	0.428143	0.421143	0.444143	0.458571	0.0106029
08:50:09	27.7	0.652	0.654	0.667	0.678	0.613	0.606	0.63			0.467	0.469	0.482	0.493	0.428	0.421	0.445	0.457857	0.0102827
08:55:09	27.7	0.652	0.653	0.669	0.68	0.614	0.603	0.631			0.467286	0.468286	0.484286	0.495286	0.429286	0.418286	0.446286	0.458429	0.0107025
09:00:09	27.7	0.652	0.65	0.668	0.68	0.615	0.603	0.63			0.468429	0.466429	0.484429	0.496429	0.431429	0.419429	0.446429	0.459	0.0105511
09:05:09	27.7	0.651	0.65	0.669	0.679	0.615	0.604	0.63			0.468286	0.467286	0.486286	0.496286	0.432286	0.421286	0.447286	0.459857	0.0104171
09:10:09	27.7	0.652	0.648	0.67	0.678	0.614	0.605	0.631			0.468429	0.464429	0.486429	0.494429	0.430429	0.421429	0.447429	0.459	0.0103368
09:15:09	27.7	0.65	0.649	0.669	0.677	0.615	0.605	0.628			0.466	0.465	0.485	0.493	0.431	0.421	0.444	0.457857	0.0101897
09:20:09	27.7	0.65	0.648	0.668	0.676	0.616	0.602	0.629			0.465571	0.463571	0.483571	0.491571	0.431571	0.417571	0.444571	0.456857	0.0102044
09:25:09	27.7	0.649	0.648	0.668	0.675	0.616	0.603	0.63			0.465143	0.464143	0.484143	0.491143	0.432143	0.419143	0.446143	0.457429	0.00998502
09:30:09	27.7	0.651	0.649	0.667	0.676	0.616	0.604	0.631			0.467714	0.465714	0.483714	0.492714	0.432714	0.420714	0.447714	0.458714	0.00994269
09:35:09	27.7	0.652	0.65	0.668	0.676	0.615	0.604	0.63			0.468857	0.466857	0.484857	0.492857	0.431857	0.420857	0.446857	0.459	0.0101335
09:40:09	27.7	0.652	0.649	0.665	0.676	0.616	0.604	0.631			0.468429	0.465429	0.481429	0.492429	0.432429	0.420429	0.447429	0.458286	0.00984989
09:45:09	27.7	0.652	0.65	0.665	0.677	0.613	0.605	0.63			0.468	0.466	0.481	0.493	0.429	0.421	0.446	0.457714	0.0100847
09:50:09	27.7	0.652	0.65	0.666	0.675	0.614	0.605	0.63			0.469857	0.467857	0.483857	0.492857	0.431857	0.422857	0.447857	0.459571	0.00991083
09:55:09	27.7	0.653	0.652	0.667	0.676	0.614	0.603	0.631			0.471	0.47	0.485	0.494	0.432	0.421	0.449	0.460286	0.0102672
10:00:09	27.7	0.653	0.651	0.667	0.675	0.613	0.604	0.63			0.474286	0.472286	0.488286	0.496286	0.434286	0.425286	0.451286	0.463143	0.010171
10:05:09	27.7	0.655	0.65	0.667	0.675	0.615	0.605	0.63			0.478286	0.473286	0.490286	0.498286	0.438286	0.428286	0.453286	0.465714	0.00998536
10:10:09	27.7	0.653	0.635	0.667	0.676	0.615	0.605	0.631			0.475286	0.457286	0.489286	0.498286	0.437286	0.427286	0.453286	0.462571	0.00993961
10:15:09	27.7	0.652	0.636	0.669	0.678	0.616	0.605	0.633			0.473857	0.457857	0.490857	0.499857	0.437857	0.426857	0.454857	0.463143	0.0100988
10:20:09	27.7	0.652	0.637	0.67	0.678	0.613	0.606	0.632			0.474429	0.459429	0.492429	0.500429	0.435429	0.428429	0.454429	0.463571	0.0102781
10:25:09	27.7	0.653	0.638	0.67	0.678	0.614	0.604	0.633			0.476143	0.461143	0.493143	0.501143	0.437143	0.427143	0.456143	0.464571	0.0103782
10:30:09	27.7	0.653	0.639	0.672	0.678	0.611	0.606	0.634			0.475571	0.461571	0.494571	0.500571	0.433571	0.428571	0.456571	0.464429	0.0105185
10:35:09	27.7	0.654	0.641	0.673	0.68	0.613	0.604	0.635			0.477	0.464	0.496	0.503	0.436	0.427	0.458	0.465857	0.0107779
10:40:09	27.7	0.653	0.641	0.674	0.678	0.614	0.605	0.636			0.475857	0.463857	0.496857	0.500857	0.436857	0.427857	0.458857	0.465857	0.0104926
10:45:09	27.7	0.652	0.64	0.674	0.677	0.614	0.605	0.635			0.475286	0.463286	0.497286	0.500286	0.437286	0.428286	0.458286	0.465714	0.0104126
10:50:09	27.7	0.653	0.641	0.673	0.675	0.615	0.607	0.637			0.478143	0.466143	0.498143	0.500143	0.440143	0.432143	0.462143	0.468143	0.00993311
10:55:09	27.7	0.652	0.641	0.673	0.674	0.615	0.606	0.637			0.478143	0.467143	0.499143	0.500143	0.441143	0.432143	0.463143	0.468714	0.00992077
11:00:09	27.7	0.653	0.642	0.673	0.67	0.614	0.607	0.637			0.479857	0.468857	0.499857	0.496857	0.440857	0.433857	0.463857	0.469143	0.00963554
11:05:09	27.7	0.653	0.644	0.672	0.671	0.613	0.608	0.638			0.480857	0.471857	0.499857	0.498857	0.440857	0.435857	0.465857	0.470571	0.00960584
11:10:09	27.7	0.653	0.643	0.672	0.671	0.613	0.609	0.639			0.482143	0.472143	0.501143	0.500143	0.442143	0.438143	0.468143	0.472	0.00950796
11:15:09	27.7	0.65	0.643	0.673	0.671	0.615	0.611	0.641			0.479714	0.472714	0.502714	0.500714	0.444714	0.440714	0.470714	0.473143	0.00918554
11:20:09	27.7	0.649	0.643	0.673	0.67	0.616	0.61	0.639			0.477571	0.471571	0.501571	0.498571	0.444571	0.438571	0.467571	0.471429	0.00912722
11:25:09	27.7	0.649	0.644	0.674	0.67	0.617	0.611	0.638			0.477857	0.472857	0.502857	0.498857	0.445857	0.439857	0.466857	0.472143	0.00906515
11:30:09	27.7	0.65	0.645	0.674	0.67	0.617	0.613	0.639			0.478429	0.473429	0.502429	0.498429	0.445429	0.441429	0.467429	0.472429	0.00890158
11:35:09	27.7	0.649	0.644	0.673	0.668	0.618	0.61	0.639			0.476857	0.471857	0.500857	0.495857	0.445857	0.437857	0.466857	0.470857	0.0088533
11:40:09	27.7	0.65	0.645	0.672	0.668	0.618	0.611	0.638			0.477143	0.472143	0.499143	0.495143	0.445143	0.438143	0.465143	0.470286	0.00871897
11:45:09	27.7	0.65	0.645	0.673	0.668	0.619	0.612	0.634			0.476857	0.471857	0.499857	0.494857	0.445857	0.438857	0.460857	0.469857	0.00872326
11:50:09	27.7	0.651	0.645	0.671	0.667	0.619	0.612	0.633			0.477143	0.471143	0.497143	0.493143	0.445143	0.438143	0.459143	0.468714	0.00854082
11:55:09	27.7	0.652	0.645	0.672	0.667	0.62	0.614	0.633			0.477571	0.470571	0.497571	0.492571	0.445571	0.439571	0.458571	0.468857	0.0084112
12:00:09	27.7	0.652	0.644	0.673	0.668	0.619	0.615	0.631			0.479571	0.471571	0.500571	0.495571	0.446571	0.442571	0.458571	0.470714	0.00860628
12:05:09	27.7	0.651	0.646	0.674	0.665	0.62	0.616	0.632			0.480571	0.475571	0.503571	0.494571	0.449571	0.445571	0.461571	0.473	0.00830335
12:10:09	27.7	0.65	0.646	0.674	0.665	0.621	0.617	0.631			0.478714	0.474714	0.502714	0.493714	0.449714	0.445714	0.459714	0.472143	0.00817329
12:15:09	27.7	0.649	0.646	0.672	0.664	0.622	0.617	0.632			0.478143	0.475143	0.501143	0.493143	0.451143	0.446143	0.461143	0.472286	0.0078146
12:20:09	27.7	0.648	0.646	0.672	0.665	0.622	0.618	0.633			0.477143	0.475143	0.501143	0.494143	0.451143	0.447143	0.462143	0.472571	0.00775167
12:25:09	27.7	0.648	0.643	0.67	0.664	0.623	0.617	0.633			0.476286	0.471286	0.498286	0.492286	0.451286	0.445286	0.461286	0.470857	0.00751144
12:30:09	27.7	0.649	0.644	0.671	0.661	0.623	0.618	0.634			0.479143	0.474143	0.501143	0.491143	0.453143	0.448143	0.464143	0.473	0.00732064
12:35:09	27.7	0.644	0.644	0.671	0.66	0.621	0.619	0.633			0.474	0.474	0.501	0.49	0.451	0.449	0.463	0.471714	0.0072759
12:40:09	27.7	0.643	0.644	0.672	0.659	0.622	0.62	0.633			0.473429	0.474429	0.502429	0.489429	0.452429	0.450429	0.463429	0.472286	0.00716947
12:45:09	27.7	0.642	0.644	0.672	0.66	0.622	0.62	0.634			0.471429	0.473429	0.501429	0.489429	0.451429	0.449429	0.463429	0.471429	0.00719788
12:50:09	27.7	0.641	0.644	0.671	0.66	0.623	0.621	0.629			0.47	0.473	0.5	0.489	0.452	0.45	0.458	0.470286	0.0071338
12:55:09	27.7	0.643	0.644	0.671	0.66	0.624	0.622	0.631			0.473143	0.474143	0.501143	0.490143	0.454143	0.452143	0.461143	0.472286	0.00692624
13:00:09	27.7	0.641	0.643	0.671	0.658	0.623	0.623	0.631			0.471571	0.473571	0.501571	0.488571	0.453571	0.453571	0.461571	0.472	0.00679586
13:05:09	27.7	0.635	0.638	0.668	0.657	0.621	0.622	0.631			0.464857	0.467857	0.497857	0.486857	0.450857	0.451857	0.460857	0.468714	0.00665271
13:10:09	27.7	0.641	0.644	0.671	0.66	0.625	0.625	0.63			0.471143	0.474143	0.501143	0.490143	0.455143	0.455143	0.460143	0.472429	0.00671074
13:15:09	27.7	0.64	0.645	0.671	0.658	0.627	0.627	0.629			0.470429	0.475429	0.501429	0.488429	0.457429	0.457429	0.459429	0.472857	0.00641374
13:20:09	27.7	0.637	0.645	0.671	0.659	0.63	0.627	0.628			0.468429	0.476429	0.502429	0.490429	0.461429	0.458429	0.459429	0.473857	0.00641374
13:25:09	27.7	0.636	0.645	0.671	0.659	0.631	0.628	0.628			0.469143	0.478143	0.504143	0.492143	0.464143	0.461143	0.461143	0.475714	0.0063353
13:30:09	27.7	0.636	0.643	0.672	0.659	0.631	0.628	0.628			0.469714	0.476714	0.505714	0.492714	0.464714	0.461714	0.461714	0.476143	0.00643227
13:35:09	27.7	0.635	0.644	0.672	0.66	0.633	0.629	0.629			0.468571	0.477571	0.505571	0.493571	0.466571	0.462571	0.462571	0.476714	0.00633745
13:40:09	27.7	0.634	0.643	0.672	0.66	0.634	0.63	0.629			0.466857	0.475857	0.504857	0.492857	0.466857	0.462857	0.461857	0.476	0.00628084
13:45:09	27.7	0.633	0.644	0.671	0.66	0.635	0.631	0.629			0.465714	0.476714	0.503714	0.492714	0.467714	0.463714	0.461714	0.476	0.00612844
13:50:09	27.7	0.634	0.643	0.672	0.659	0.636	0.632	0.631			0.466571	0.475571	0.504571	0.491571	0.468571	0.464571	0.463571	0.476429	0.0059499
13:55:09	27.7	0.633	0.644	0.673	0.659	0.637	0.633	0.632			0.466429	0.477429	0.506429	0.492429	0.470429	0.466429	0.465429	0.477857	0.00597557
14:00:09	27.7	0.633	0.644	0.668	0.659	0.638	0.634	0.632			0.466	0.477	0.501	0.492	0.471	0.467	0.465	0.477	0.00534968
14:05:09	27.7	0.632	0.644	0.668	0.658	0.638	0.634	0.633			0.464857	0.476857	0.500857	0.490857	0.470857	0.466857	0.465857	0.476714	0.00528443
14:10:09	27.7	0.632	0.645	0.668	0.658	0.632	0.634	0.631			0.465286	0.478286	0.501286	0.491286	0.465286	0.467286	0.464286	0.476143	0.00560794
14:15:09	27.7	0.632	0.645	0.668	0.657	0.633	0.634	0.632			0.466	0.479	0.502	0.491	0.467	0.468	0.466	0.477	0.00545108
14:20:09	27.7	0.632	0.646	0.668	0.657	0.632	0.634	0.632			0.465429	0.479429	0.501429	0.490429	0.465429	0.467429	0.465429	0.476429	0.00550757
14:25:09	27.7	0.631	0.647	0.668	0.658	0.632	0.635	0.633			0.463857	0.479857	0.500857	0.490857	0.464857	0.467857	0.465857	0.476286	0.00555002
14:30:09	27.7	0.631	0.646	0.668	0.658	0.632	0.635	0.63			0.466143	0.481143	0.503143	0.493143	0.467143	0.470143	0.465143	0.478	0.00568385
14:35:09	27.7	0.632	0.647	0.666	0.659	0.634	0.636	0.632			0.467	0.482	0.501	0.494	0.469	0.471	0.467	0.478714	0.0052767
14:40:09	27.7	0.631	0.646	0.665	0.657	0.633	0.636	0.632			0.468571	0.483571	0.502571	0.494571	0.470571	0.473571	0.469571	0.480429	0.00512431
14:45:09	27.7	0.632	0.647	0.665	0.659	0.633	0.636	0.633			0.469	0.484	0.502	0.496	0.47	0.473	0.47	0.480571	0.00517253
14:50:09	27.7	0.633	0.645	0.666	0.658	0.632	0.637	0.633			0.469857	0.481857	0.502857	0.494857	0.468857	0.473857	0.469857	0.480286	0.00514947
14:55:09	27.7	0.633	0.644	0.666	0.658	0.631	0.636	0.633			0.470429	0.481429	0.503429	0.495429	0.468429	0.473429	0.470429	0.480429	0.00522813
15:00:09	27.7	0.633	0.645	0.666	0.659	0.631	0.637	0.634			0.471429	0.483429	0.504429	0.497429	0.469429	0.475429	0.472429	0.482	0.00522748
15:05:09	27.7	0.634	0.646	0.666	0.66	0.632	0.635	0.633			0.473143	0.485143	0.505143	0.499143	0.471143	0.474143	0.472143	0.482857	0.00532163
15:10:09	27.7	0.632	0.645	0.666	0.66	0.632	0.636	0.634			0.470571	0.483571	0.504571	0.498571	0.470571	0.474571	0.472571	0.482143	0.00532674
15:15:09	27.7	0.63	0.647	0.665	0.661	0.633	0.636	0.632			0.468571	0.485571	0.503571	0.499571	0.471571	0.474571	0.470571	0.482	0.00548095
15:20:09	27.7	0.631	0.649	0.666	0.662	0.634	0.633	0.633			0.469857	0.487857	0.504857	0.500857	0.472857	0.471857	0.471857	0.482857	0.00565685
15:25:09	27.7	0.631	0.649	0.667	0.662	0.635	0.634	0.633			0.47	0.488	0.506	0.501	0.474	0.473	0.472	0.483429	0.00566467
15:30:09	27.7	0.631	0.649	0.668	0.662	0.634	0.634	0.632			0.471286	0.489286	0.508286	0.502286	0.474286	0.474286	0.472286	0.484571	0.00585017
15:35:09	27.7	0.631	0.645	0.668	0.661	0.634	0.634	0.633			0.470714	0.484714	0.507714	0.500714	0.473714	0.473714	0.472714	0.483429	0.00568085
15:40:09	27.7	0.631	0.646	0.666	0.662	0.636	0.635	0.635			0.472	0.487	0.507	0.503	0.477	0.476	0.476	0.485429	0.00535794
15:45:09	27.7	0.631	0.647	0.665	0.661	0.636	0.635	0.635			0.473143	0.489143	0.507143	0.503143	0.478143	0.477143	0.477143	0.486429	0.00519484
15:50:09	27.7	0.631	0.648	0.664	0.659	0.637	0.636	0.632			0.475429	0.492429	0.508429	0.503429	0.481429	0.480429	0.476429	0.488286	0.00503998
15:55:09	27.7	0.631	0.647	0.665	0.658	0.634	0.636	0.631			0.475143	0.491143	0.509143	0.502143	0.478143	0.480143	0.475143	0.487286	0.00521641
16:00:09	27.7	0.632	0.646	0.664	0.658	0.633	0.637	0.631			0.475857	0.489857	0.507857	0.501857	0.476857	0.480857	0.474857	0.486857	0.00506153
16:05:09	27.7	0.632	0.646	0.665	0.66	0.635	0.637	0.63			0.475857	0.489857	0.508857	0.503857	0.478857	0.480857	0.473857	0.487429	0.00527734
16:10:09	27.7	0.632	0.647	0.666	0.659	0.636	0.637	0.627			0.475	0.49	0.509	0.502	0.479	0.48	0.47	0.486429	0.00548095
16:15:09	27.7	0.632	0.647	0.666	0.66	0.632	0.638	0.627			0.474571	0.489571	0.508571	0.502571	0.474571	0.480571	0.469571	0.485714	0.00568385
16:20:09	27.7	0.633	0.646	0.667	0.655	0.632	0.638	0.625			0.475	0.488	0.509	0.497	0.474	0.48	0.467	0.484286	0.0055537
16:25:09	27.7	0.633	0.646	0.666	0.654	0.632	0.638	0.625			0.475857	0.488857	0.508857	0.496857	0.474857	0.480857	0.467857	0.484857	0.005394
16:30:09	27.7	0.634	0.646	0.667	0.655	0.632	0.637	0.626			0.478571	0.490571	0.511571	0.499571	0.476571	0.481571	0.470571	0.487	0.00546355
16:35:09	27.7	0.634	0.647	0.667	0.655	0.632	0.638	0.626			0.477571	0.490571	0.510571	0.498571	0.475571	0.481571	0.469571	0.486286	0.00545856
16:40:09	27.7	0.635	0.647	0.668	0.656	0.633	0.639	0.626			0.478571	0.490571	0.511571	0.499571	0.476571	0.482571	0.469571	0.487	0.00551559
16:45:09	27.7	0.636	0.648	0.668	0.656	0.633	0.639	0.626			0.478857	0.490857	0.510857	0.498857	0.475857	0.481857	0.468857	0.486571	0.00549768
16:50:09	27.7	0.636	0.648	0.669	0.657	0.634	0.64	0.627			0.478143	0.490143	0.511143	0.499143	0.476143	0.482143	0.469143	0.486571	0.00551559
16:55:09	27.7	0.634	0.649	0.67	0.658	0.632	0.64	0.628			0.476	0.491	0.512	0.5	0.474	0.482	0.47	0.486429	0.00579761
17:00:09	27.6	0.634	0.65	0.671	0.659	0.633	0.641	0.628			0.476571	0.492571	0.513571	0.501571	0.475571	0.483571	0.470571	0.487714	0.00590975
17:05:09	27.6	0.635	0.65	0.671	0.66	0.634	0.64	0.629			0.477429	0.492429	0.513429	0.502429	0.476429	0.482429	0.471429	0.488	0.00582628
17:10:09	27.6	0.636	0.651	0.672	0.66	0.635	0.641	0.63			0.480714	0.495714	0.516714	0.504714	0.479714	0.485714	0.474714	0.491143	0.00576879
17:15:09	27.7	0.636	0.651	0.672	0.66	0.635	0.641	0.629			0.480857	0.495857	0.516857	0.504857	0.479857	0.485857	0.473857	0.491143	0.00583795
17:20:09	27.6	0.637	0.652	0.673	0.66	0.636	0.642	0.63			0.482571	0.497571	0.518571	0.505571	0.481571	0.487571	0.475571	0.492714	0.00578351
17:25:09	27.6	0.637	0.653	0.671	0.66	0.635	0.642	0.63			0.482571	0.498571	0.516571	0.505571	0.480571	0.487571	0.475571	0.492429	0.00564602
17:30:09	27.7	0.637	0.652	0.671	0.661	0.636	0.641	0.631			0.482	0.497	0.516	0.506	0.481	0.486	0.476	0.492	0.00558484
17:35:09	27.6	0.637	0.653	0.668	0.662	0.636	0.638	0.631			0.482714	0.498714	0.513714	0.507714	0.481714	0.483714	0.476714	0.492143	0.00547226
17:40:09	27.6	0.637	0.651	0.669	0.657	0.632	0.639	0.632			0.482143	0.496143	0.514143	0.502143	0.477143	0.484143	0.477143	0.490429	0.00533057
17:45:09	27.7	0.638	0.651	0.67	0.658	0.629	0.639	0.632			0.482714	0.495714	0.514714	0.502714	0.473714	0.483714	0.476714	0.49	0.00564723
17:50:09	27.7	0.639	0.652	0.67	0.659	0.628	0.638	0.634			0.483286	0.496286	0.514286	0.503286	0.472286	0.482286	0.478286	0.49	0.00569341
17:55:09	27.6	0.64	0.65	0.67	0.658	0.628	0.637	0.634			0.484	0.494	0.514	0.502	0.472	0.481	0.478	0.489286	0.00560066
18:00:09	27.7	0.641	0.651	0.671	0.659	0.629	0.637	0.635			0.484571	0.494571	0.514571	0.502571	0.472571	0.480571	0.478571	0.489714	0.00563758
18:05:09	27.6	0.642	0.651	0.671	0.659	0.629	0.638	0.635			0.485429	0.494429	0.514429	0.502429	0.472429	0.481429	0.478429	0.489857	0.00557997
18:10:09	27.6	0.642	0.651	0.672	0.658	0.629	0.639	0.636			0.484857	0.493857	0.514857	0.500857	0.471857	0.481857	0.478857	0.489571	0.0055537
18:15:09	27.6	0.643	0.652	0.672	0.657	0.63	0.638	0.636			0.485429	0.494429	0.514429	0.499429	0.472429	0.480429	0.478429	0.489286	0.00547039
18:20:09	27.6	0.644	0.647	0.672	0.655	0.631	0.639	0.637			0.486143	0.489143	0.514143	0.497143	0.473143	0.481143	0.479143	0.488571	0.00515409
18:25:09	27.6	0.645	0.649	0.673	0.657	0.631	0.634	0.638			0.486714	0.490714	0.514714	0.498714	0.472714	0.475714	0.479714	0.488429	0.00554082
18:30:09	27.6	0.645	0.648	0.674	0.657	0.63	0.634	0.637			0.486143	0.489143	0.515143	0.498143	0.471143	0.475143	0.478143	0.487571	0.00575225
18:35:09	27.6	0.646	0.648	0.674	0.657	0.63	0.634	0.638			0.487429	0.489429	0.515429	0.498429	0.471429	0.475429	0.479429	0.488143	0.00571012
18:40:09	27.7	0.646	0.649	0.675	0.659	0.63	0.635	0.639			0.486857	0.489857	0.515857	0.499857	0.470857	0.475857	0.479857	0.488429	0.00583037
18:45:09	27.7	0.647	0.65	0.676	0.657	0.631	0.635	0.639			0.488143	0.491143	0.517143	0.498143	0.472143	0.476143	0.480143	0.489	0.00579174
18:50:09	27.6	0.647	0.651	0.677	0.658	0.631	0.636	0.641			0.487571	0.491571	0.517571	0.498571	0.471571	0.476571	0.481571	0.489286	0.00583387
18:55:09	27.7	0.648	0.651	0.678	0.658	0.63	0.635	0.641			0.488571	0.491571	0.518571	0.498571	0.470571	0.475571	0.481571	0.489286	0.00606989
19:00:09	27.6	0.649	0.652	0.678	0.656	0.631	0.635	0.642			0.489143	0.492143	0.518143	0.496143	0.471143	0.475143	0.482143	0.489143	0.00591205
19:05:09	27.6	0.649	0.653	0.678	0.657	0.632	0.633	0.642			0.492571	0.496571	0.521571	0.500571	0.475571	0.476571	0.485571	0.492714	0.00600567
19:10:09	27.6	0.649	0.653	0.678	0.657	0.633	0.632	0.642			0.492286	0.496286	0.521286	0.500286	0.476286	0.475286	0.485286	0.492429	0.00600567
19:15:09	27.6	0.647	0.651	0.677	0.657	0.626	0.632	0.643			0.491143	0.495143	0.521143	0.501143	0.470143	0.476143	0.487143	0.491714	0.00635407
19:20:09	27.6	0.645	0.655	0.68	0.659	0.628	0.633	0.644			0.488714	0.498714	0.523714	0.502714	0.471714	0.476714	0.487714	0.492857	0.00660962
19:25:09	27.6	0.642	0.653	0.68	0.658	0.627	0.632	0.645			0.485286	0.496286	0.523286	0.501286	0.470286	0.475286	0.488286	0.491429	0.00670972
19:30:09	27.6	0.645	0.657	0.682	0.66	0.629	0.633	0.644			0.489143	0.501143	0.526143	0.504143	0.473143	0.477143	0.488143	0.494143	0.00683827
19:35:09	27.6	0.644	0.658	0.683	0.66	0.629	0.635	0.644			0.487857	0.501857	0.526857	0.503857	0.472857	0.478857	0.487857	0.494286	0.00688289
19:40:09	27.6	0.644	0.659	0.684	0.659	0.63	0.635	0.646			0.487714	0.502714	0.527714	0.502714	0.473714	0.478714	0.489714	0.494714	0.00687992
19:45:09	27.6	0.643	0.658	0.684	0.659	0.63	0.635	0.646			0.486714	0.501714	0.527714	0.502714	0.473714	0.478714	0.489714	0.494429	0.00687893
19:50:09	27.6	0.642	0.659	0.686	0.66	0.631	0.636	0.645			0.486571	0.503571	0.530571	0.504571	0.475571	0.480571	0.489571	0.495857	0.00709028
19:55:09	27.6	0.642	0.655	0.686	0.66	0.63	0.637	0.646			0.486857	0.499857	0.530857	0.504857	0.474857	0.481857	0.490857	0.495714	0.00701165
20:00:09	27.7	0.643	0.656	0.685	0.657	0.631	0.637	0.647			0.487571	0.500571	0.529571	0.501571	0.475571	0.481571	0.491571	0.495429	0.00671327
20:05:09	27.6	0.642	0.655	0.686	0.657	0.631	0.639	0.648			0.486286	0.499286	0.530286	0.501286	0.475286	0.483286	0.492286	0.495429	0.00674512
20:10:09	27.6	0.643	0.656	0.686	0.657	0.631	0.638	0.648			0.487143	0.500143	0.530143	0.501143	0.475143	0.482143	0.492143	0.495429	0.0067743
20:15:09	27.6	0.642	0.656	0.687	0.658	0.632	0.638	0.649			0.485429	0.499429	0.530429	0.501429	0.475429	0.481429	0.492429	0.495143	0.00686854
20:20:09	27.6	0.643	0.655	0.686	0.659	0.633	0.639	0.65			0.486286	0.498286	0.529286	0.502286	0.476286	0.482286	0.493286	0.495429	0.0065988
20:25:09	27.6	0.644	0.656	0.686	0.658	0.633	0.639	0.649			0.487143	0.499143	0.529143	0.501143	0.476143	0.482143	0.492143	0.495286	0.00656625
20:30:09	27.6	0.645	0.657	0.683	0.66	0.632	0.639	0.651			0.487571	0.499571	0.525571	0.502571	0.474571	0.481571	0.493571	0.495	0.00630139
20:35:09	27.6	0.646	0.657	0.681	0.659	0.632	0.637	0.651			0.489143	0.500143	0.524143	0.502143	0.475143	0.480143	0.494143	0.495	0.00612733
20:40:09	27.7	0.645	0.657	0.682	0.66	0.632	0.638	0.652			0.487857	0.499857	0.524857	0.502857	0.474857	0.480857	0.494857	0.495143	0.00623628
20:45:09	27.6	0.646	0.658	0.681	0.66	0.633	0.639	0.65			0.490571	0.502571	0.525571	0.504571	0.477571	0.483571	0.494571	0.497	0.00599546
20:50:09	27.6	0.643	0.656	0.681	0.66	0.632	0.638	0.65			0.488857	0.501857	0.526857	0.505857	0.477857	0.483857	0.495857	0.497286	0.00617158
20:55:09	27.6	0.647	0.66	0.683	0.662	0.634	0.64	0.651			0.493714	0.506714	0.529714	0.508714	0.480714	0.486714	0.497714	0.500571	0.00616221
21:00:09	27.6	0.645	0.661	0.68	0.662	0.632	0.641	0.651			0.494857	0.510857	0.529857	0.511857	0.481857	0.490857	0.500857	0.503	0.00602941
21:05:09	27.6	0.646	0.654	0.68	0.663	0.632	0.64	0.651			0.495857	0.503857	0.529857	0.512857	0.481857	0.489857	0.500857	0.502143	0.00595505
21:10:09	27.6	0.646	0.654	0.682	0.662	0.633	0.641	0.651			0.497571	0.505571	0.533571	0.513571	0.484571	0.492571	0.502571	0.504286	0.00601472
21:15:09	27.6	0.647	0.654	0.682	0.657	0.634	0.64	0.65			0.498571	0.505571	0.533571	0.508571	0.485571	0.491571	0.501571	0.503571	0.00582687
21:20:09	27.6	0.648	0.656	0.682	0.659	0.635	0.641	0.652			0.499143	0.507143	0.533143	0.510143	0.486143	0.492143	0.503143	0.504429	0.00573093
21:25:09	27.6	0.647	0.657	0.683	0.66	0.635	0.641	0.653			0.497714	0.507714	0.533714	0.510714	0.485714	0.491714	0.503714	0.504429	0.00590687
21:30:09	27.6	0.647	0.655	0.684	0.66	0.635	0.642	0.653			0.497429	0.505429	0.534429	0.510429	0.485429	0.492429	0.503429	0.504143	0.00595904
21:35:09	27.6	0.648	0.655	0.684	0.661	0.633	0.642	0.654			0.498714	0.505714	0.534714	0.511714	0.483714	0.492714	0.504714	0.504571	0.00611567
21:40:09	27.6	0.649	0.652	0.685	0.662	0.632	0.642	0.653			0.499714	0.502714	0.535714	0.512714	0.482714	0.492714	0.503714	0.504286	0.00632778
21:45:09	27.6	0.65	0.653	0.686	0.663	0.633	0.641	0.654			0.500429	0.503429	0.536429	0.513429	0.483429	0.491429	0.504429	0.504714	0.00642063
21:50:09	27.6	0.649	0.653	0.686	0.664	0.634	0.641	0.655			0.499	0.503	0.536	0.514	0.484	0.491	0.505	0.504571	0.00639515
21:55:09	27.6	0.65	0.654	0.687	0.664	0.633	0.642	0.655			0.499714	0.503714	0.536714	0.513714	0.482714	0.491714	0.504714	0.504714	0.00651738
22:00:09	27.6	0.65	0.654	0.687	0.663	0.633	0.643	0.656			0.499714	0.503714	0.536714	0.512714	0.482714	0.492714	0.505714	0.504857	0.00644179
22:05:09	27.6	0.651	0.654	0.688	0.665	0.634	0.642	0.657			0.500143	0.503143	0.537143	0.514143	0.483143	0.491143	0.506143	0.505	0.0065735
22:10:09	27.6	0.651	0.655	0.685	0.666	0.634	0.643	0.658			0.500143	0.504143	0.534143	0.515143	0.483143	0.492143	0.507143	0.505143	0.00621825
22:15:09	27.6	0.651	0.657	0.686	0.666	0.635	0.643	0.658			0.499429	0.505429	0.534429	0.514429	0.483429	0.491429	0.506429	0.505	0.00624445
22:20:09	27.6	0.65	0.658	0.686	0.667	0.636	0.643	0.659			0.500429	0.508429	0.536429	0.517429	0.486429	0.493429	0.509429	0.507429	0.00623355
22:25:09	27.6	0.652	0.659	0.687	0.668	0.637	0.643	0.661			0.502429	0.509429	0.537429	0.518429	0.487429	0.493429	0.511429	0.508571	0.00627326
22:30:09	27.6	0.652	0.659	0.687	0.668	0.637	0.644	0.662			0.502143	0.509143	0.537143	0.518143	0.487143	0.494143	0.512143	0.508571	0.00622918
22:35:09	27.6	0.653	0.66	0.688	0.668	0.638	0.644	0.653			0.505	0.512	0.54	0.52	0.49	0.496	0.505	0.509714	0.00626675
22:40:09	27.6	0.653	0.661	0.688	0.669	0.638	0.641	0.654			0.504571	0.512571	0.539571	0.520571	0.489571	0.492571	0.505571	0.509286	0.00647234
22:45:09	27.6	0.653	0.662	0.689	0.669	0.639	0.641	0.653			0.504286	0.513286	0.540286	0.520286	0.490286	0.492286	0.504286	0.509286	0.0065429
22:50:09	27.6	0.654	0.659	0.689	0.669	0.639	0.642	0.652			0.505	0.51	0.54	0.52	0.49	0.493	0.503	0.508714	0.00645761
22:55:09	27.6	0.654	0.659	0.691	0.67	0.64	0.642	0.651			0.505	0.51	0.542	0.521	0.491	0.493	0.502	0.509143	0.0066884
23:00:09	27.6	0.654	0.661	0.691	0.672	0.641	0.643	0.652			0.504714	0.511714	0.541714	0.522714	0.491714	0.493714	0.502714	0.509857	0.00663838
23:05:09	27.6	0.655	0.661	0.692	0.672	0.642	0.644	0.652			0.505429	0.511429	0.542429	0.522429	0.492429	0.494429	0.502429	0.510143	0.00661425
23:10:09	27.6	0.654	0.661	0.693	0.671	0.642	0.645	0.653			0.505429	0.512429	0.544429	0.522429	0.493429	0.496429	0.504429	0.511286	0.00662761
23:15:09	27.6	0.653	0.662	0.687	0.672	0.643	0.645	0.653			0.504571	0.513571	0.538571	0.523571	0.494571	0.496571	0.504571	0.510857	0.00594705
23:20:09	27.6	0.652	0.664	0.687	0.674	0.644	0.645	0.653			0.505143	0.517143	0.540143	0.527143	0.497143	0.498143	0.506143	0.513	0.00604518
23:25:09	27.6	0.653	0.664	0.688	0.674	0.642	0.645	0.654			0.505857	0.516857	0.540857	0.526857	0.494857	0.497857	0.506857	0.512857	0.00622973
23:30:09	27.6	0.653	0.663	0.688	0.675	0.643	0.646	0.654			0.505429	0.515429	0.540429	0.527429	0.495429	0.498429	0.506429	0.512714	0.00614784
23:35:09	27.6	0.652	0.665	0.687	0.675	0.643	0.647	0.655			0.507	0.52	0.542	0.53	0.498	0.502	0.51	0.515571	0.0060232
23:40:09	27.6	0.653	0.666	0.685	0.676	0.644	0.647	0.655			0.508286	0.521286	0.540286	0.531286	0.499286	0.502286	0.510286	0.516143	0.00579585
23:45:09	27.6	0.653	0.662	0.685	0.676	0.644	0.646	0.655			0.508143	0.517143	0.540143	0.531143	0.499143	0.501143	0.510143	0.515286	0.00579585
23:50:09	27.6	0.654	0.662	0.686	0.677	0.645	0.645	0.656			0.509429	0.517429	0.541429	0.532429	0.500429	0.500429	0.511429	0.516143	0.0059109
23:55:09	27.6	0.654	0.663	0.686	0.678	0.645	0.645	0.657			0.509	0.518	0.541	0.533	0.5	0.5	0.512	0.516143	0.00596589
1 day, 0:00:09	27.6	0.654	0.663	0.687	0.679	0.646	0.643	0.657			0.508714	0.517714	0.541714	0.533714	0.500714	0.497714	0.511714	0.516	0.00620566
1 day, 0:05:09	27.6	0.655	0.663	0.688	0.68	0.647	0.644	0.657			0.509429	0.517429	0.542429	0.534429	0.501429	0.498429	0.511429	0.516429	0.00621825
1 day, 0:10:09	27.6	0.652	0.663	0.688	0.68	0.648	0.643	0.658			0.506286	0.517286	0.542286	0.534286	0.502286	0.497286	0.512286	0.516	0.00631217
1 day, 0:15:09	27.6	0.652	0.664	0.689	0.68	0.648	0.643	0.66			0.508857	0.520857	0.545857	0.536857	0.504857	0.499857	0.516857	0.519143	0.00639462
1 day, 0:20:09	27.6	0.652	0.664	0.689	0.68	0.649	0.644	0.661			0.508857	0.520857	0.545857	0.536857	0.505857	0.500857	0.517857	0.519571	0.00626295
1 day, 0:25:09	27.6	0.653	0.665	0.69	0.681	0.649	0.644	0.662			0.509571	0.521571	0.546571	0.537571	0.505571	0.500571	0.518571	0.52	0.0063877
1 day, 0:30:09	27.6	0.654	0.665	0.688	0.682	0.65	0.645	0.658			0.510429	0.521429	0.544429	0.538429	0.506429	0.501429	0.514429	0.519571	0.0061506
1 day, 0:35:09	27.6	0.655	0.667	0.684	0.683	0.651	0.646	0.659			0.515857	0.527857	0.544857	0.543857	0.511857	0.506857	0.519857	0.524429	0.00570654
1 day, 0:40:09	27.6	0.654	0.667	0.685	0.683	0.651	0.646	0.656			0.514714	0.527714	0.545714	0.543714	0.511714	0.506714	0.516714	0.523857	0.00590169
1 day, 0:45:09	27.6	0.654	0.667	0.685	0.683	0.652	0.647	0.658			0.514143	0.527143	0.545143	0.543143	0.512143	0.507143	0.518143	0.523857	0.00573093
1 day, 0:50:09	27.6	0.655	0.668	0.686	0.685	0.653	0.647	0.658			0.515	0.528	0.546	0.545	0.513	0.507	0.518	0.524571	0.00590745
1 day, 0:55:09	27.6	0.656	0.669	0.686	0.686	0.653	0.648	0.659			0.515571	0.528571	0.545571	0.545571	0.512571	0.507571	0.518571	0.524857	0.00587048
1 day, 1:00:09	27.7	0.656	0.67	0.686	0.686	0.653	0.649	0.659			0.515571	0.529571	0.545571	0.545571	0.512571	0.508571	0.518571	0.525143	0.0058181

## Sheet: KB_delserCGA-1
Time	T° 600	C7	C9	C11	E8	E10	G7	G9		raw data - medium control mean	C7	C9	C11	E8	E10	G7	G9	Mean	Se
00:00:09	27.1	0.239	0.38	0.124	0.117	0.137	0.234	0.895			0.122286	0.263286	0.00728571	0.000285714	0.0202857	0.117286	0.778286	0.0884524	0.0414531
00:05:09	27.2	0.209	0.349	0.126	0.121	0.142	0.183	0.804			0.0922857	0.232286	0.00928571	0.00428571	0.0252857	0.0662857	0.687286	0.159571	0.0350406
00:10:09	27.2	0.197	0.334	0.128	0.124	0.145	0.167	0.685			0.0801429	0.217143	0.0111429	0.00714286	0.0281429	0.0501429	0.568143	0.137429	0.0322498
00:15:09	27.3	0.192	0.325	0.128	0.127	0.147	0.163	0.678			0.0752857	0.208286	0.0112857	0.0102857	0.0302857	0.0462857	0.561286	0.134714	0.0305829											The well G9 was removed from the analysis, because the starting OD600 was far outside the normal range. This could indicate a bubble, excessive condensation, a scratch on the plate, etc. Notably, including G9 in the Vmax analysis did not change the level of statistical significance for a difference between SBW25 and delserCGA-1.
00:20:09	27.3	0.189	0.32	0.128	0.128	0.148	0.16	0.732			0.0722857	0.203286	0.0112857	0.0112857	0.0312857	0.0432857	0.615286	0.141143	0.0297236
00:25:09	27.3	0.189	0.318	0.128	0.129	0.147	0.159	0.742			0.0722857	0.201286	0.0112857	0.0122857	0.0302857	0.0422857	0.625286	0.142143	0.0294071
00:30:09	27.3	0.19	0.317	0.128	0.13	0.146	0.158	0.773			0.0732857	0.200286	0.0112857	0.0132857	0.0292857	0.0412857	0.656286	0.146429	0.0292648
00:35:09	27.4	0.194	0.317	0.128	0.13	0.145	0.157	0.759			0.0774286	0.200429	0.0114286	0.0134286	0.0284286	0.0404286	0.642429	0.144857	0.0293879
00:40:09	27.4	0.195	0.317	0.128	0.131	0.144	0.157	0.804			0.0784286	0.200429	0.0114286	0.0144286	0.0274286	0.0404286	0.687429	0.151429	0.0293901
00:45:09	27.4	0.203	0.316	0.128	0.131	0.143	0.156	0.824			0.0867143	0.199714	0.0117143	0.0147143	0.0267143	0.0397143	0.707714	0.155286	0.0294808
00:50:09	27.5	0.204	0.315	0.128	0.131	0.143	0.156	0.859			0.0874286	0.198429	0.0114286	0.0144286	0.0264286	0.0394286	0.742429	0.16	0.0293539
00:55:09	27.5	0.209	0.314	0.128	0.131	0.142	0.156	0.869			0.0924286	0.197429	0.0114286	0.0144286	0.0254286	0.0394286	0.752429	0.161857	0.029395
01:00:09	27.5	0.197	0.314	0.128	0.13	0.142	0.156	0.888			0.0802857	0.197286	0.0112857	0.0132857	0.0252857	0.0392857	0.771286	0.162571	0.0291209
01:05:09	27.5	0.197	0.314	0.129	0.13	0.142	0.156	0.922			0.0798571	0.196857	0.0118571	0.0128571	0.0248571	0.0388571	0.804857	0.167143	0.0290643
01:10:09	27.5	0.199	0.315	0.13	0.132	0.142	0.157	0.94			0.0812857	0.197286	0.0122857	0.0142857	0.0242857	0.0392857	0.822286	0.170143	0.0290739
01:15:09	27.5	0.202	0.316	0.132	0.133	0.143	0.158	0.96			0.083	0.197	0.013	0.014	0.024	0.039	0.841	0.173	0.0290651
01:20:09	27.5	0.205	0.316	0.133	0.134	0.144	0.159	0.974			0.085	0.196	0.013	0.014	0.024	0.039	0.854	0.175	0.0289614
01:25:09	27.5	0.208	0.317	0.134	0.136	0.145	0.161	0.977			0.0864286	0.195429	0.0124286	0.0144286	0.0234286	0.0394286	0.855429	0.175286	0.0289353
01:30:09	27.5	0.211	0.318	0.136	0.137	0.146	0.162	0.971			0.0882857	0.195286	0.0132857	0.0142857	0.0232857	0.0392857	0.848286	0.174571	0.0289367
01:35:09	27.5	0.215	0.319	0.137	0.138	0.147	0.163	0.955			0.091	0.195	0.013	0.014	0.023	0.039	0.831	0.172286	0.0290307
01:40:09	27.5	0.219	0.319	0.139	0.14	0.148	0.164	0.93			0.094	0.194	0.014	0.015	0.023	0.039	0.805	0.169143	0.0288691
01:45:09	27.5	0.221	0.321	0.14	0.141	0.149	0.166	0.9			0.0947143	0.194714	0.0137143	0.0147143	0.0227143	0.0397143	0.773714	0.164857	0.0290283
01:50:09	27.5	0.225	0.321	0.142	0.143	0.15	0.167	0.87			0.0972857	0.193286	0.0142857	0.0152857	0.0222857	0.0392857	0.742286	0.160571	0.0288775
01:55:09	27.5	0.228	0.323	0.144	0.144	0.152	0.169	0.843			0.0988571	0.193857	0.0148571	0.0148571	0.0228571	0.0398571	0.713857	0.157	0.0289732
02:00:09	27.5	0.231	0.324	0.145	0.146	0.153	0.17	0.82			0.100857	0.193857	0.0148571	0.0158571	0.0228571	0.0398571	0.689857	0.154	0.0289982
02:05:09	27.5	0.233	0.326	0.147	0.147	0.155	0.172	0.808			0.101714	0.194714	0.0157143	0.0157143	0.0237143	0.0407143	0.676714	0.152714	0.0290547
02:10:09	27.5	0.236	0.328	0.149	0.149	0.156	0.173	0.791			0.103143	0.195143	0.0161429	0.0161429	0.0231429	0.0401429	0.658143	0.150286	0.0291739
02:15:09	27.5	0.238	0.329	0.15	0.15	0.157	0.174	0.778			0.104	0.195	0.016	0.016	0.023	0.04	0.644	0.148286	0.0292172
02:20:09	27.5	0.24	0.33	0.152	0.151	0.158	0.175	0.764			0.104857	0.194857	0.0168571	0.0158571	0.0228571	0.0398571	0.628857	0.146286	0.029205
02:25:09	27.5	0.243	0.331	0.153	0.153	0.159	0.177	0.752			0.106857	0.194857	0.0168571	0.0168571	0.0228571	0.0408571	0.615857	0.145	0.0292092
02:30:09	27.5	0.244	0.332	0.155	0.154	0.161	0.178	0.739			0.106857	0.194857	0.0178571	0.0168571	0.0238571	0.0408571	0.601857	0.143286	0.0291033
02:35:09	27.5	0.248	0.333	0.157	0.156	0.162	0.18	0.729			0.109429	0.194429	0.0184286	0.0174286	0.0234286	0.0414286	0.590429	0.142143	0.029101
02:40:09	27.5	0.251	0.334	0.158	0.157	0.164	0.181	0.718			0.111429	0.194429	0.0184286	0.0174286	0.0244286	0.0414286	0.578429	0.140857	0.0291488
02:45:09	27.5	0.253	0.335	0.16	0.159	0.166	0.183	0.712			0.112286	0.194286	0.0192857	0.0182857	0.0252857	0.0422857	0.571286	0.140429	0.0290042
02:50:09	27.5	0.257	0.336	0.161	0.161	0.167	0.185	0.704			0.115143	0.194143	0.0191429	0.0191429	0.0251429	0.0431429	0.562143	0.139714	0.0290705
02:55:09	27.5	0.261	0.338	0.163	0.162	0.169	0.186	0.695			0.117857	0.194857	0.0198571	0.0188571	0.0258571	0.0428571	0.551857	0.138857	0.0292659
03:00:09	27.5	0.263	0.339	0.165	0.164	0.17	0.188	0.687			0.118714	0.194714	0.0207143	0.0197143	0.0257143	0.0437143	0.542714	0.138	0.0291747
03:05:09	27.5	0.268	0.34	0.167	0.165	0.172	0.19	0.677			0.122714	0.194714	0.0217143	0.0197143	0.0267143	0.0447143	0.531714	0.137429	0.029262
03:10:09	27.5	0.27	0.341	0.169	0.167	0.174	0.191	0.666			0.123429	0.194429	0.0224286	0.0204286	0.0274286	0.0444286	0.519429	0.136	0.0291532
03:15:09	27.5	0.275	0.342	0.171	0.168	0.176	0.193	0.657			0.127429	0.194429	0.0234286	0.0204286	0.0284286	0.0454286	0.509429	0.135571	0.0292545
03:20:09	27.6	0.279	0.343	0.173	0.17	0.178	0.195	0.65			0.13	0.194	0.024	0.021	0.029	0.046	0.501	0.135	0.0292427
03:25:09	27.6	0.284	0.344	0.175	0.171	0.18	0.196	0.644			0.134143	0.194143	0.0251429	0.0211429	0.0301429	0.0461429	0.494143	0.135	0.0293961
03:30:09	27.6	0.286	0.346	0.177	0.173	0.182	0.198	0.637			0.134714	0.194714	0.0257143	0.0217143	0.0307143	0.0467143	0.485714	0.134286	0.0293961
03:35:09	27.6	0.29	0.347	0.178	0.175	0.185	0.2	0.631			0.137429	0.194429	0.0254286	0.0224286	0.0324286	0.0474286	0.478429	0.134	0.0294046
03:40:09	27.6	0.294	0.348	0.18	0.176	0.187	0.203	0.629			0.14	0.194	0.026	0.022	0.033	0.049	0.475	0.134143	0.0294411
03:45:09	27.6	0.298	0.349	0.182	0.178	0.189	0.204	0.625			0.143	0.194	0.027	0.023	0.034	0.049	0.47	0.134286	0.0294863
03:50:09	27.6	0.302	0.351	0.184	0.18	0.192	0.208	0.622			0.146	0.195	0.028	0.024	0.036	0.052	0.466	0.135286	0.0295188
03:55:09	27.6	0.305	0.352	0.186	0.182	0.194	0.21	0.618			0.147714	0.194714	0.0287143	0.0247143	0.0367143	0.0527143	0.460714	0.135143	0.0294646
04:00:09	27.6	0.318	0.353	0.188	0.184	0.196	0.212	0.614			0.159286	0.194286	0.0292857	0.0252857	0.0372857	0.0532857	0.455286	0.136286	0.0302175
04:05:09	27.6	0.324	0.354	0.191	0.186	0.198	0.214	0.612			0.164143	0.194143	0.0311429	0.0261429	0.0381429	0.0541429	0.452143	0.137143	0.0303795
04:10:09	27.6	0.327	0.355	0.194	0.188	0.2	0.216	0.607			0.166143	0.194143	0.0331429	0.0271429	0.0391429	0.0551429	0.446143	0.137286	0.0302893
04:15:09	27.6	0.331	0.356	0.196	0.191	0.203	0.217	0.605			0.169	0.194	0.034	0.029	0.041	0.055	0.443	0.137857	0.0302688
04:20:09	27.6	0.334	0.357	0.199	0.193	0.204	0.219	0.601			0.170714	0.193714	0.0357143	0.0297143	0.0407143	0.0557143	0.437714	0.137714	0.0302357
04:25:09	27.6	0.338	0.358	0.202	0.196	0.207	0.221	0.598			0.173857	0.193857	0.0378571	0.0318571	0.0428571	0.0568571	0.433857	0.138714	0.0301316
04:30:09	27.6	0.342	0.359	0.206	0.195	0.209	0.223	0.594			0.176429	0.193429	0.0404286	0.0294286	0.0434286	0.0574286	0.428429	0.138429	0.0302893
04:35:09	27.6	0.347	0.36	0.208	0.197	0.21	0.224	0.591			0.18	0.193	0.041	0.03	0.043	0.057	0.424	0.138286	0.0305534
04:40:09	27.6	0.351	0.362	0.21	0.199	0.212	0.225	0.588			0.183	0.194	0.042	0.031	0.044	0.057	0.42	0.138714	0.0307868
04:45:09	27.6	0.354	0.363	0.212	0.201	0.215	0.226	0.585			0.185	0.194	0.043	0.032	0.046	0.057	0.416	0.139	0.030763
04:50:09	27.6	0.358	0.365	0.214	0.202	0.217	0.228	0.581			0.188	0.195	0.044	0.032	0.047	0.058	0.411	0.139286	0.0310301
04:55:09	27.6	0.362	0.366	0.217	0.204	0.219	0.23	0.578			0.191	0.195	0.046	0.033	0.048	0.059	0.407	0.139857	0.0310727
05:00:09	27.6	0.366	0.367	0.219	0.205	0.22	0.23	0.575			0.193714	0.194714	0.0467143	0.0327143	0.0477143	0.0577143	0.402714	0.139429	0.0313703
05:05:09	27.6	0.369	0.368	0.22	0.207	0.223	0.232	0.572			0.196857	0.195857	0.0478571	0.0348571	0.0508571	0.0598571	0.399857	0.140857	0.0313724
05:10:09	27.6	0.369	0.369	0.222	0.208	0.225	0.233	0.57			0.196286	0.196286	0.0492857	0.0352857	0.0522857	0.0602857	0.397286	0.141	0.0311652
05:15:09	27.6	0.371	0.37	0.223	0.21	0.227	0.236	0.568			0.198	0.197	0.05	0.037	0.054	0.063	0.395	0.142	0.0310735
05:20:09	27.6	0.375	0.371	0.225	0.211	0.228	0.238	0.565			0.201429	0.197429	0.0514286	0.0374286	0.0544286	0.0644286	0.391429	0.142571	0.0312993
05:25:09	27.6	0.378	0.374	0.227	0.211	0.225	0.238	0.562			0.203571	0.199571	0.0525714	0.0365714	0.0505714	0.0635714	0.387571	0.142	0.0319779
05:30:09	27.6	0.381	0.373	0.228	0.212	0.225	0.24	0.56			0.205286	0.197286	0.0522857	0.0362857	0.0492857	0.0642857	0.384286	0.141286	0.0320049
05:35:09	27.6	0.385	0.374	0.228	0.211	0.227	0.242	0.558			0.209143	0.198143	0.0521429	0.0351429	0.0511429	0.0661429	0.382143	0.142	0.0324298
05:40:09	27.6	0.388	0.375	0.229	0.21	0.228	0.244	0.556			0.211571	0.198571	0.0525714	0.0335714	0.0515714	0.0675714	0.379571	0.142143	0.0327536
05:45:09	27.6	0.39	0.375	0.231	0.212	0.227	0.246	0.555			0.212286	0.197286	0.0532857	0.0342857	0.0492857	0.0682857	0.377286	0.141714	0.0327184
05:50:09	27.6	0.391	0.376	0.233	0.215	0.23	0.248	0.554			0.213	0.198	0.055	0.037	0.052	0.07	0.376	0.143	0.0323866
05:55:09	27.6	0.392	0.377	0.234	0.217	0.229	0.248	0.554			0.214	0.199	0.056	0.039	0.051	0.07	0.376	0.143571	0.0324627
06:00:09	27.6	0.394	0.378	0.236	0.216	0.231	0.247	0.553			0.215286	0.199286	0.0572857	0.0372857	0.0522857	0.0682857	0.374286	0.143429	0.0326809
06:05:09	27.6	0.397	0.379	0.237	0.218	0.234	0.249	0.552			0.218286	0.200286	0.0582857	0.0392857	0.0552857	0.0702857	0.373286	0.145	0.0326942
06:10:09	27.6	0.399	0.38	0.238	0.221	0.237	0.251	0.55			0.22	0.201	0.059	0.042	0.058	0.072	0.371	0.146143	0.0325286
06:15:09	27.6	0.401	0.382	0.238	0.223	0.238	0.251	0.547			0.221714	0.202714	0.0587143	0.0437143	0.0587143	0.0717143	0.367714	0.146429	0.0327591
06:20:09	27.6	0.402	0.384	0.238	0.223	0.239	0.254	0.546			0.222143	0.204143	0.0581429	0.0431429	0.0591429	0.0741429	0.366143	0.146714	0.0328988
06:25:09	27.6	0.406	0.384	0.242	0.226	0.243	0.254	0.543			0.225143	0.203143	0.0611429	0.0451429	0.0621429	0.0731429	0.362143	0.147429	0.0327412
06:30:08	27.6	0.405	0.384	0.243	0.228	0.246	0.255	0.543			0.223429	0.202429	0.0614286	0.0464286	0.0644286	0.0734286	0.361429	0.147571	0.0322498
06:35:09	27.6	0.407	0.384	0.247	0.23	0.248	0.256	0.542			0.225143	0.202143	0.0651429	0.0481429	0.0661429	0.0741429	0.360143	0.148714	0.0320017
06:40:09	27.6	0.409	0.385	0.245	0.231	0.249	0.259	0.539			0.227714	0.203714	0.0637143	0.0497143	0.0677143	0.0777143	0.357714	0.149714	0.0321939
06:45:09	27.6	0.412	0.386	0.244	0.232	0.252	0.261	0.539			0.230286	0.204286	0.0622857	0.0502857	0.0702857	0.0792857	0.357286	0.150571	0.0324021
06:50:09	27.6	0.412	0.388	0.243	0.234	0.254	0.264	0.539			0.229286	0.205286	0.0602857	0.0512857	0.0712857	0.0812857	0.356286	0.150714	0.0323011
06:55:09	27.6	0.414	0.39	0.246	0.234	0.254	0.266	0.539			0.231	0.207	0.063	0.051	0.071	0.083	0.356	0.151714	0.0324743
07:00:09	27.6	0.417	0.39	0.24	0.235	0.258	0.269	0.539			0.234	0.207	0.057	0.052	0.075	0.086	0.356	0.152429	0.0328255
07:05:09	27.6	0.421	0.389	0.242	0.238	0.262	0.27	0.538			0.237571	0.205571	0.0585714	0.0545714	0.0785714	0.0865714	0.354571	0.153714	0.0326769
07:10:09	27.6	0.424	0.39	0.245	0.24	0.266	0.274	0.539			0.240714	0.206714	0.0617143	0.0567143	0.0827143	0.0907143	0.355714	0.156429	0.0324959
07:15:09	27.6	0.427	0.39	0.246	0.243	0.27	0.277	0.539			0.244857	0.207857	0.0638571	0.0608571	0.0878571	0.0948571	0.356857	0.159571	0.032329
07:20:09	27.6	0.43	0.391	0.246	0.246	0.269	0.279	0.539			0.247429	0.208429	0.0634286	0.0634286	0.0864286	0.0964286	0.356429	0.160286	0.032555
07:25:09	27.6	0.433	0.392	0.246	0.25	0.272	0.281	0.539			0.250143	0.209143	0.0631429	0.0671429	0.0891429	0.0981429	0.356143	0.161857	0.0325583
07:30:09	27.6	0.435	0.395	0.249	0.246	0.276	0.284	0.54			0.252429	0.212429	0.0664286	0.0634286	0.0934286	0.101429	0.357429	0.163857	0.0328607
07:35:09	27.6	0.437	0.397	0.253	0.249	0.28	0.288	0.539			0.253857	0.213857	0.0698571	0.0658571	0.0968571	0.104857	0.355857	0.165857	0.0325214
07:40:09	27.6	0.435	0.399	0.256	0.253	0.28	0.286	0.54			0.251	0.215	0.072	0.069	0.096	0.102	0.356	0.165857	0.0320348
07:45:09	27.6	0.438	0.402	0.257	0.256	0.284	0.289	0.541			0.253714	0.217714	0.0727143	0.0717143	0.0997143	0.104714	0.356714	0.168143	0.0321268
07:50:09	27.6	0.436	0.406	0.259	0.259	0.288	0.293	0.543			0.251429	0.221429	0.0744286	0.0744286	0.103429	0.108429	0.358429	0.170286	0.0316088
07:55:09	27.6	0.437	0.406	0.26	0.26	0.291	0.296	0.543			0.252143	0.221143	0.0751429	0.0751429	0.106143	0.111143	0.358143	0.171286	0.0313858
08:00:09	27.6	0.439	0.409	0.264	0.264	0.295	0.299	0.544			0.255286	0.225286	0.0802857	0.0802857	0.111286	0.115286	0.360286	0.175429	0.0310931
08:05:09	27.6	0.441	0.411	0.268	0.267	0.299	0.303	0.544			0.256571	0.226571	0.0835714	0.0825714	0.114571	0.118571	0.359571	0.177429	0.0307525
08:10:09	27.6	0.442	0.411	0.272	0.267	0.302	0.306	0.544			0.256857	0.225857	0.0868571	0.0818571	0.116857	0.120857	0.358857	0.178286	0.0304036
08:15:09	27.6	0.444	0.414	0.275	0.27	0.306	0.307	0.544			0.258571	0.228571	0.0895714	0.0845714	0.120571	0.121571	0.358571	0.180286	0.0303128
08:20:09	27.6	0.445	0.417	0.279	0.274	0.31	0.309	0.545			0.259	0.231	0.093	0.088	0.124	0.123	0.359	0.182429	0.0299366
08:25:09	27.6	0.445	0.418	0.284	0.275	0.309	0.31	0.548			0.259286	0.232286	0.0982857	0.0892857	0.123286	0.124286	0.362286	0.184143	0.0296259
08:30:09	27.6	0.445	0.419	0.289	0.278	0.309	0.31	0.55			0.259429	0.233429	0.103429	0.0924286	0.123429	0.124429	0.364429	0.185857	0.0291864
08:35:09	27.6	0.448	0.42	0.29	0.282	0.313	0.314	0.551			0.263714	0.235714	0.105714	0.0977143	0.128714	0.129714	0.366714	0.189714	0.0289894
08:40:09	27.7	0.449	0.416	0.295	0.284	0.317	0.319	0.553			0.263857	0.230857	0.109857	0.0988571	0.131857	0.133857	0.367857	0.191	0.0280008
08:45:09	27.7	0.452	0.413	0.3	0.287	0.322	0.323	0.552			0.267143	0.228143	0.115143	0.102143	0.137143	0.138143	0.367143	0.193571	0.0272968
08:50:09	27.7	0.455	0.414	0.301	0.288	0.327	0.328	0.554			0.27	0.229	0.116	0.103	0.142	0.143	0.369	0.196	0.0272952
08:55:09	27.7	0.458	0.417	0.304	0.29	0.332	0.333	0.557			0.273286	0.232286	0.119286	0.105286	0.147286	0.148286	0.372286	0.199714	0.0272576
09:00:09	27.7	0.46	0.419	0.305	0.293	0.332	0.337	0.557			0.276429	0.235429	0.121429	0.109429	0.148429	0.153429	0.373429	0.202571	0.0272491
09:05:09	27.7	0.463	0.421	0.305	0.297	0.335	0.339	0.556			0.280286	0.238286	0.122286	0.114286	0.152286	0.156286	0.373286	0.205286	0.0273191
09:10:09	27.7	0.466	0.423	0.311	0.297	0.34	0.342	0.556			0.282429	0.239429	0.127429	0.113429	0.156429	0.158429	0.372429	0.207143	0.0272267
09:15:09	27.7	0.468	0.423	0.318	0.299	0.344	0.34	0.556			0.284	0.239	0.134	0.115	0.16	0.156	0.372	0.208571	0.0268349
09:20:09	27.7	0.47	0.419	0.32	0.303	0.347	0.332	0.557			0.285571	0.234571	0.135571	0.118571	0.162571	0.147571	0.372571	0.208143	0.0265975
09:25:09	27.7	0.514	0.418	0.326	0.307	0.351	0.333	0.582			0.330143	0.234143	0.142143	0.123143	0.167143	0.149143	0.398143	0.220571	0.0319034
09:30:09	27.7	0.585	0.444	0.327	0.31	0.351	0.336	0.6			0.401714	0.260714	0.143714	0.126714	0.167714	0.152714	0.416714	0.238571	0.0430963
09:35:09	27.7	0.584	0.489	0.329	0.315	0.415	0.341	0.632			0.400857	0.305857	0.145857	0.131857	0.231857	0.157857	0.448857	0.260429	0.0435357
09:40:09	27.7	0.575	0.516	0.331	0.319	0.408	0.34	0.628			0.391429	0.332429	0.147429	0.135429	0.224429	0.156429	0.444429	0.261714	0.0438736
09:45:09	27.7	0.586	0.508	0.333	0.322	0.426	0.344	0.636			0.402	0.324	0.149	0.138	0.242	0.16	0.452	0.266714	0.0440775
09:50:09	27.7	0.599	0.512	0.33	0.326	0.439	0.345	0.645			0.416857	0.329857	0.147857	0.143857	0.256857	0.162857	0.462857	0.274429	0.0459227
09:55:09	27.7	0.604	0.511	0.333	0.331	0.461	0.348	0.64			0.422	0.329	0.151	0.149	0.279	0.166	0.458	0.279143	0.0460874
10:00:09	27.7	0.609	0.521	0.337	0.333	0.483	0.345	0.642			0.430286	0.342286	0.158286	0.154286	0.304286	0.166286	0.463286	0.288429	0.04762
10:05:09	27.7	0.611	0.52	0.338	0.337	0.48	0.356	0.639			0.434286	0.343286	0.161286	0.160286	0.303286	0.179286	0.462286	0.292	0.0466581
10:10:09	27.7	0.611	0.536	0.353	0.343	0.491	0.408	0.638			0.433286	0.358286	0.175286	0.165286	0.313286	0.230286	0.460286	0.305143	0.0437135
10:15:09	27.7	0.61	0.539	0.412	0.347	0.499	0.452	0.637			0.431857	0.360857	0.233857	0.168857	0.320857	0.273857	0.458857	0.321286	0.0381949
10:20:09	27.7	0.61	0.528	0.442	0.348	0.501	0.461	0.636			0.432429	0.350429	0.264429	0.170429	0.323429	0.283429	0.458429	0.326143	0.0359895
10:25:09	27.7	0.609	0.527	0.428	0.355	0.504	0.466	0.635			0.432143	0.350143	0.251143	0.178143	0.327143	0.289143	0.458143	0.326571	0.035561
10:30:09	27.7	0.607	0.528	0.464	0.398	0.503	0.471	0.633			0.429571	0.350571	0.286571	0.220571	0.325571	0.293571	0.455571	0.337429	0.0286606
10:35:09	27.7	0.607	0.528	0.482	0.42	0.502	0.479	0.632			0.43	0.351	0.305	0.243	0.325	0.302	0.455	0.344429	0.0253955
10:40:09	27.7	0.605	0.528	0.483	0.435	0.505	0.494	0.632			0.427857	0.350857	0.305857	0.257857	0.327857	0.316857	0.454857	0.348857	0.0230704
10:45:09	27.7	0.604	0.526	0.492	0.44	0.503	0.506	0.63			0.427286	0.349286	0.315286	0.263286	0.326286	0.329286	0.453286	0.352	0.0218791
10:50:09	27.7	0.603	0.527	0.488	0.449	0.504	0.509	0.63			0.428143	0.352143	0.313143	0.274143	0.329143	0.334143	0.455143	0.355143	0.0209072
10:55:09	27.7	0.602	0.525	0.486	0.466	0.504	0.505	0.629			0.428143	0.351143	0.312143	0.292143	0.330143	0.331143	0.455143	0.357143	0.0192625
11:00:09	27.7	0.602	0.526	0.481	0.47	0.505	0.506	0.629			0.428857	0.352857	0.307857	0.296857	0.331857	0.332857	0.455857	0.358143	0.0191937
11:05:09	27.7	0.601	0.523	0.482	0.486	0.506	0.511	0.628			0.428857	0.350857	0.309857	0.313857	0.333857	0.338857	0.455857	0.361714	0.0177265
11:10:09	27.7	0.6	0.521	0.482	0.48	0.507	0.511	0.625			0.429143	0.350143	0.311143	0.309143	0.336143	0.340143	0.454143	0.361429	0.017921
11:15:09	27.7	0.601	0.523	0.482	0.483	0.504	0.511	0.625			0.430714	0.352714	0.311714	0.312714	0.333714	0.340714	0.454714	0.362429	0.0179605
11:20:09	27.7	0.599	0.523	0.483	0.485	0.504	0.51	0.623			0.427571	0.351571	0.311571	0.313571	0.332571	0.338571	0.451571	0.361	0.0174712
11:25:09	27.7	0.598	0.522	0.484	0.486	0.504	0.511	0.622			0.426857	0.350857	0.312857	0.314857	0.332857	0.339857	0.450857	0.361286	0.0171654
11:30:09	27.7	0.598	0.522	0.485	0.488	0.504	0.511	0.621			0.426429	0.350429	0.313429	0.316429	0.332429	0.339429	0.449429	0.361143	0.0169804
11:35:09	27.7	0.598	0.52	0.485	0.487	0.503	0.511	0.62			0.425857	0.347857	0.312857	0.314857	0.330857	0.338857	0.447857	0.359857	0.0170542
11:40:09	27.7	0.597	0.519	0.486	0.487	0.502	0.51	0.617			0.424143	0.346143	0.313143	0.314143	0.329143	0.337143	0.444143	0.358286	0.0168709
11:45:09	27.7	0.597	0.519	0.478	0.487	0.503	0.51	0.617			0.423857	0.345857	0.304857	0.313857	0.329857	0.336857	0.443857	0.357	0.0173775
11:50:09	27.7	0.597	0.519	0.479	0.487	0.5	0.511	0.615			0.423143	0.345143	0.305143	0.313143	0.326143	0.337143	0.441143	0.355857	0.0173777
11:55:09	27.7	0.594	0.519	0.479	0.489	0.501	0.511	0.614			0.419571	0.344571	0.304571	0.314571	0.326571	0.336571	0.439571	0.355143	0.0167725
12:00:09	27.7	0.593	0.519	0.481	0.489	0.502	0.512	0.615			0.420571	0.346571	0.308571	0.316571	0.329571	0.339571	0.442571	0.357714	0.0164357
12:05:09	27.7	0.595	0.516	0.481	0.489	0.503	0.512	0.613			0.424571	0.345571	0.310571	0.318571	0.332571	0.341571	0.442571	0.359429	0.0167133
12:10:09	27.7	0.594	0.513	0.481	0.488	0.503	0.511	0.612			0.422714	0.341714	0.309714	0.316714	0.331714	0.339714	0.440714	0.357571	0.0166233
12:15:09	27.7	0.593	0.509	0.481	0.485	0.502	0.508	0.612			0.422143	0.338143	0.310143	0.314143	0.331143	0.337143	0.441143	0.356286	0.0167033
12:20:09	27.7	0.594	0.509	0.482	0.483	0.501	0.509	0.611			0.423143	0.338143	0.311143	0.312143	0.330143	0.338143	0.440143	0.356143	0.0169293
12:25:09	27.7	0.594	0.509	0.484	0.482	0.502	0.509	0.61			0.422286	0.337286	0.312286	0.310286	0.330286	0.337286	0.438286	0.355429	0.0168477
12:30:09	27.7	0.594	0.508	0.485	0.482	0.501	0.509	0.609			0.424143	0.338143	0.315143	0.312143	0.331143	0.339143	0.439143	0.357	0.0168234
12:35:09	27.7	0.594	0.508	0.485	0.482	0.501	0.509	0.608			0.424	0.338	0.315	0.312	0.331	0.339	0.438	0.356714	0.0168234
12:40:09	27.7	0.594	0.502	0.486	0.477	0.5	0.508	0.607			0.424429	0.332429	0.316429	0.307429	0.330429	0.338429	0.437429	0.355286	0.0172055
12:45:09	27.7	0.589	0.501	0.486	0.477	0.496	0.508	0.606			0.418429	0.330429	0.315429	0.306429	0.325429	0.337429	0.435429	0.352714	0.0165182
12:50:09	27.7	0.586	0.5	0.486	0.478	0.497	0.506	0.604			0.415	0.329	0.315	0.307	0.326	0.335	0.433	0.351429	0.0159717
12:55:09	27.7	0.586	0.5	0.488	0.48	0.497	0.507	0.604			0.416143	0.330143	0.318143	0.310143	0.327143	0.337143	0.434143	0.353286	0.0157452
13:00:09	27.7	0.585	0.499	0.488	0.479	0.497	0.507	0.603			0.415571	0.329571	0.318571	0.309571	0.327571	0.337571	0.433571	0.353143	0.0156683
13:05:09	27.7	0.583	0.497	0.486	0.478	0.496	0.505	0.602			0.412857	0.326857	0.315857	0.307857	0.325857	0.334857	0.431857	0.350857	0.0155794
13:10:09	27.7	0.585	0.499	0.489	0.481	0.499	0.506	0.599			0.415143	0.329143	0.319143	0.311143	0.329143	0.336143	0.429143	0.352714	0.0154541
13:15:09	27.7	0.586	0.498	0.49	0.481	0.499	0.507	0.598			0.416429	0.328429	0.320429	0.311429	0.329429	0.337429	0.428429	0.353143	0.0155893
13:20:09	27.7	0.587	0.498	0.489	0.481	0.5	0.507	0.597			0.418429	0.329429	0.320429	0.312429	0.331429	0.338429	0.428429	0.354143	0.0157727
13:25:09	27.7	0.586	0.497	0.49	0.481	0.499	0.507	0.595			0.419143	0.330143	0.323143	0.314143	0.332143	0.340143	0.428143	0.355286	0.0156162
13:30:09	27.7	0.586	0.496	0.492	0.481	0.5	0.506	0.594			0.419714	0.329714	0.325714	0.314714	0.333714	0.339714	0.427714	0.355857	0.0155487
13:35:09	27.7	0.584	0.496	0.488	0.477	0.501	0.506	0.594			0.417571	0.329571	0.321571	0.310571	0.334571	0.339571	0.427571	0.354429	0.0156326
13:40:09	27.7	0.585	0.496	0.484	0.477	0.501	0.507	0.593			0.417857	0.328857	0.316857	0.309857	0.333857	0.339857	0.425857	0.353286	0.0159785
13:45:09	27.7	0.585	0.496	0.485	0.477	0.5	0.507	0.593			0.417714	0.328714	0.317714	0.309714	0.332714	0.339714	0.425714	0.353143	0.015945
13:50:09	27.7	0.586	0.496	0.485	0.478	0.502	0.507	0.593			0.418571	0.328571	0.317571	0.310571	0.334571	0.339571	0.425571	0.353571	0.0160083
13:55:09	27.7	0.586	0.496	0.486	0.475	0.502	0.502	0.594			0.419429	0.329429	0.319429	0.308429	0.335429	0.335429	0.427429	0.353571	0.0161996
14:00:09	27.7	0.587	0.496	0.487	0.476	0.5	0.504	0.593			0.42	0.329	0.32	0.309	0.333	0.337	0.426	0.353429	0.0162576
14:05:09	27.7	0.587	0.494	0.487	0.475	0.49	0.504	0.592			0.419857	0.326857	0.319857	0.307857	0.322857	0.336857	0.424857	0.351286	0.0166201
14:10:09	27.7	0.588	0.495	0.488	0.475	0.49	0.505	0.592			0.421286	0.328286	0.321286	0.308286	0.323286	0.338286	0.425286	0.352286	0.0167161
14:15:09	27.7	0.589	0.495	0.487	0.476	0.491	0.504	0.592			0.423	0.329	0.321	0.31	0.325	0.338	0.426	0.353143	0.0168266
14:20:09	27.7	0.589	0.495	0.486	0.476	0.491	0.502	0.592			0.422429	0.328429	0.319429	0.309429	0.324429	0.335429	0.425429	0.352143	0.0168814
14:25:09	27.7	0.59	0.494	0.487	0.476	0.492	0.5	0.591			0.422857	0.326857	0.319857	0.308857	0.324857	0.332857	0.423857	0.351429	0.0170211
14:30:09	27.7	0.581	0.49	0.487	0.478	0.492	0.501	0.591			0.416143	0.325143	0.322143	0.313143	0.327143	0.336143	0.426143	0.352286	0.0155337
14:35:09	27.7	0.582	0.49	0.488	0.479	0.493	0.501	0.592			0.417	0.325	0.323	0.314	0.328	0.336	0.427	0.352857	0.0155751
14:40:09	27.7	0.583	0.49	0.488	0.478	0.493	0.502	0.592			0.420571	0.327571	0.325571	0.315571	0.330571	0.339571	0.429571	0.355571	0.0157875
14:45:09	27.7	0.582	0.49	0.489	0.478	0.494	0.502	0.591			0.419	0.327	0.326	0.315	0.331	0.339	0.428	0.355	0.0155615
14:50:09	27.7	0.583	0.489	0.483	0.48	0.49	0.503	0.592			0.419857	0.325857	0.319857	0.316857	0.326857	0.339857	0.428857	0.354	0.0159972
14:55:09	27.7	0.583	0.489	0.484	0.474	0.491	0.503	0.592			0.420429	0.326429	0.321429	0.311429	0.328429	0.340429	0.429429	0.354	0.0162645
15:00:09	27.7	0.584	0.49	0.485	0.474	0.49	0.504	0.59			0.422429	0.328429	0.323429	0.312429	0.328429	0.342429	0.428429	0.355143	0.0163824
15:05:09	27.7	0.585	0.49	0.486	0.474	0.492	0.5	0.591			0.424143	0.329143	0.325143	0.313143	0.331143	0.339143	0.430143	0.356	0.0164717
15:10:09	27.7	0.585	0.489	0.485	0.475	0.488	0.5	0.59			0.423571	0.327571	0.323571	0.313571	0.326571	0.338571	0.428571	0.354571	0.0165925
15:15:09	27.7	0.586	0.489	0.485	0.476	0.484	0.5	0.59			0.424571	0.327571	0.323571	0.314571	0.322571	0.338571	0.428571	0.354286	0.0168398
15:20:09	27.7	0.586	0.49	0.485	0.477	0.483	0.501	0.589			0.424857	0.328857	0.323857	0.315857	0.321857	0.339857	0.427857	0.354714	0.0167922
15:25:09	27.7	0.588	0.49	0.486	0.477	0.483	0.5	0.588			0.427	0.329	0.325	0.316	0.322	0.339	0.427	0.355	0.01709
15:30:09	27.7	0.586	0.491	0.486	0.477	0.481	0.501	0.587			0.426286	0.331286	0.326286	0.317286	0.321286	0.341286	0.427286	0.355857	0.016816
15:35:09	27.7	0.586	0.491	0.485	0.477	0.482	0.502	0.584			0.425714	0.330714	0.324714	0.316714	0.321714	0.341714	0.423714	0.355	0.0168036
15:40:09	27.7	0.586	0.492	0.485	0.478	0.484	0.503	0.584			0.427	0.333	0.326	0.319	0.325	0.344	0.425	0.357	0.0166366
15:45:09	27.7	0.587	0.492	0.486	0.479	0.485	0.503	0.584			0.429143	0.334143	0.328143	0.321143	0.327143	0.345143	0.426143	0.358714	0.0166667
15:50:09	27.7	0.584	0.492	0.484	0.472	0.486	0.504	0.584			0.428429	0.336429	0.328429	0.316429	0.330429	0.348429	0.428429	0.359571	0.0166246
15:55:09	27.7	0.579	0.493	0.484	0.47	0.486	0.505	0.584			0.423143	0.337143	0.328143	0.314143	0.330143	0.349143	0.428143	0.358571	0.0159362
16:00:09	27.7	0.576	0.493	0.484	0.47	0.487	0.503	0.584			0.419857	0.336857	0.327857	0.313857	0.330857	0.346857	0.427857	0.357714	0.0154173
16:05:09	27.7	0.576	0.493	0.484	0.471	0.488	0.505	0.583			0.419857	0.336857	0.327857	0.314857	0.331857	0.348857	0.426857	0.358143	0.0153219
16:10:09	27.7	0.578	0.493	0.484	0.472	0.489	0.506	0.583			0.421	0.336	0.327	0.315	0.332	0.349	0.426	0.358	0.0155449
16:15:09	27.7	0.578	0.494	0.485	0.473	0.49	0.507	0.583			0.420571	0.336571	0.327571	0.315571	0.332571	0.349571	0.425571	0.358286	0.0153856
16:20:09	27.7	0.578	0.494	0.485	0.473	0.491	0.507	0.583			0.42	0.336	0.327	0.315	0.333	0.349	0.425	0.357857	0.0153551
16:25:09	27.7	0.578	0.495	0.485	0.474	0.492	0.508	0.584			0.420857	0.337857	0.327857	0.316857	0.334857	0.350857	0.426857	0.359429	0.0152396
16:30:09	27.7	0.579	0.495	0.477	0.475	0.493	0.509	0.585			0.423571	0.339571	0.321571	0.319571	0.337571	0.353571	0.429571	0.360714	0.0157261
16:35:09	27.7	0.58	0.495	0.478	0.475	0.494	0.51	0.578			0.423571	0.338571	0.321571	0.318571	0.337571	0.353571	0.421571	0.359286	0.0158107
16:40:09	27.7	0.58	0.497	0.478	0.477	0.495	0.512	0.577			0.423571	0.340571	0.321571	0.320571	0.338571	0.355571	0.420571	0.360143	0.0156392
16:45:09	27.7	0.581	0.497	0.477	0.476	0.494	0.513	0.577			0.423857	0.339857	0.319857	0.318857	0.336857	0.355857	0.419857	0.359286	0.0159576
16:50:09	27.7	0.576	0.496	0.479	0.476	0.492	0.506	0.577			0.418143	0.338143	0.321143	0.318143	0.334143	0.348143	0.419143	0.356714	0.0150608
16:55:09	27.7	0.575	0.496	0.479	0.477	0.493	0.503	0.578			0.417	0.338	0.321	0.319	0.335	0.345	0.42	0.356429	0.0148108
17:00:09	27.6	0.575	0.497	0.48	0.479	0.495	0.502	0.578			0.417571	0.339571	0.322571	0.321571	0.337571	0.344571	0.420571	0.357714	0.0145755
17:05:09	27.6	0.575	0.499	0.48	0.478	0.496	0.501	0.579			0.417429	0.341429	0.322429	0.320429	0.338429	0.343429	0.421429	0.357857	0.0145909
17:10:09	27.6	0.576	0.5	0.48	0.479	0.496	0.501	0.58			0.420714	0.344714	0.324714	0.323714	0.340714	0.345714	0.424714	0.360714	0.014678
17:15:09	27.7	0.575	0.5	0.48	0.479	0.498	0.503	0.579			0.419857	0.344857	0.324857	0.323857	0.342857	0.347857	0.423857	0.361143	0.0144624
17:20:09	27.6	0.575	0.501	0.482	0.48	0.498	0.504	0.57			0.420571	0.346571	0.327571	0.325571	0.343571	0.349571	0.415571	0.361286	0.0142634
17:25:09	27.6	0.575	0.501	0.483	0.476	0.498	0.505	0.571			0.420571	0.346571	0.328571	0.321571	0.343571	0.350571	0.416571	0.361143	0.0144676
17:30:09	27.7	0.576	0.502	0.484	0.477	0.499	0.506	0.571			0.421	0.347	0.329	0.322	0.344	0.351	0.416	0.361429	0.0144676
17:35:09	27.6	0.575	0.502	0.483	0.477	0.497	0.507	0.565			0.420714	0.347714	0.328714	0.322714	0.342714	0.352714	0.410714	0.360857	0.0144047
17:40:09	27.6	0.575	0.504	0.482	0.479	0.499	0.508	0.566			0.420143	0.349143	0.327143	0.324143	0.344143	0.353143	0.411143	0.361286	0.0142628
17:45:09	27.7	0.576	0.505	0.484	0.48	0.5	0.508	0.566			0.420714	0.349714	0.328714	0.324714	0.344714	0.352714	0.410714	0.361714	0.0142043
17:50:09	27.7	0.575	0.506	0.485	0.48	0.501	0.51	0.567			0.419286	0.350286	0.329286	0.324286	0.345286	0.354286	0.411286	0.362	0.0139589
17:55:09	27.6	0.576	0.507	0.485	0.481	0.503	0.511	0.567			0.42	0.351	0.329	0.325	0.347	0.355	0.411	0.362571	0.0139994
18:00:09	27.7	0.576	0.508	0.486	0.483	0.504	0.511	0.568			0.419571	0.351571	0.329571	0.326571	0.347571	0.354571	0.411571	0.363	0.0137736
18:05:09	27.6	0.571	0.507	0.483	0.484	0.505	0.512	0.569			0.414429	0.350429	0.326429	0.327429	0.348429	0.355429	0.412429	0.362143	0.0131191
18:10:09	27.6	0.572	0.509	0.484	0.485	0.506	0.512	0.57			0.414857	0.351857	0.326857	0.327857	0.348857	0.354857	0.412857	0.362571	0.0131089
18:15:09	27.6	0.567	0.509	0.485	0.48	0.505	0.51	0.571			0.409429	0.351429	0.327429	0.322429	0.347429	0.352429	0.413429	0.360571	0.0126456
18:20:09	27.6	0.567	0.509	0.486	0.48	0.506	0.51	0.571			0.409143	0.351143	0.328143	0.322143	0.348143	0.352143	0.413143	0.360571	0.0125716
18:25:09	27.6	0.561	0.51	0.488	0.481	0.508	0.511	0.571			0.402714	0.351714	0.329714	0.322714	0.349714	0.352714	0.412714	0.360286	0.0114467
18:30:09	27.6	0.56	0.511	0.488	0.482	0.509	0.511	0.571			0.401143	0.352143	0.329143	0.323143	0.350143	0.352143	0.412143	0.36	0.0112114
18:35:09	27.6	0.56	0.511	0.488	0.483	0.509	0.511	0.572			0.401429	0.352429	0.329429	0.324429	0.350429	0.352429	0.413429	0.360571	0.0111285
18:40:09	27.7	0.561	0.512	0.489	0.484	0.51	0.512	0.572			0.401857	0.352857	0.329857	0.324857	0.350857	0.352857	0.412857	0.360857	0.0111285
18:45:09	27.7	0.561	0.513	0.491	0.485	0.511	0.511	0.572			0.402143	0.354143	0.332143	0.326143	0.352143	0.352143	0.413143	0.361714	0.0109148
18:50:09	27.6	0.561	0.514	0.492	0.486	0.512	0.512	0.571			0.401571	0.354571	0.332571	0.326571	0.352571	0.352571	0.411571	0.361714	0.0107654
18:55:09	27.7	0.562	0.514	0.493	0.487	0.512	0.513	0.571			0.402571	0.354571	0.333571	0.327571	0.352571	0.353571	0.411571	0.362286	0.0107665
19:00:09	27.6	0.562	0.509	0.494	0.488	0.507	0.514	0.572			0.402143	0.349143	0.334143	0.328143	0.347143	0.354143	0.412143	0.361	0.0107041
19:05:09	27.6	0.562	0.51	0.495	0.49	0.507	0.515	0.572			0.405571	0.353571	0.338571	0.333571	0.350571	0.358571	0.415571	0.365143	0.0104926
19:10:09	27.6	0.563	0.51	0.496	0.49	0.509	0.515	0.572			0.406286	0.353286	0.339286	0.333286	0.352286	0.358286	0.415286	0.365429	0.0105559
19:15:09	27.6	0.562	0.511	0.495	0.491	0.509	0.515	0.572			0.406143	0.355143	0.339143	0.335143	0.353143	0.359143	0.416143	0.366286	0.0103744
19:20:09	27.6	0.563	0.513	0.497	0.493	0.512	0.516	0.572			0.406714	0.356714	0.340714	0.336714	0.355714	0.359714	0.415714	0.367429	0.0102035
19:25:09	27.6	0.56	0.511	0.497	0.491	0.511	0.516	0.572			0.403286	0.354286	0.340286	0.334286	0.354286	0.359286	0.415286	0.365857	0.00992528
19:30:09	27.6	0.561	0.51	0.5	0.494	0.514	0.518	0.571			0.405143	0.354143	0.344143	0.338143	0.358143	0.362143	0.415143	0.368143	0.00967614
19:35:09	27.6	0.561	0.505	0.497	0.495	0.516	0.519	0.572			0.404857	0.348857	0.340857	0.338857	0.359857	0.362857	0.415857	0.367429	0.00992556
19:40:09	27.6	0.56	0.506	0.498	0.496	0.512	0.52	0.571			0.403714	0.349714	0.341714	0.339714	0.355714	0.363714	0.414714	0.367	0.0096425
19:45:09	27.6	0.56	0.506	0.498	0.497	0.513	0.519	0.571			0.403714	0.349714	0.341714	0.340714	0.356714	0.362714	0.414714	0.367143	0.00955249
19:50:09	27.6	0.561	0.507	0.5	0.492	0.513	0.52	0.572			0.405571	0.351571	0.344571	0.336571	0.357571	0.364571	0.416571	0.368143	0.00993563
19:55:09	27.6	0.562	0.506	0.5	0.492	0.51	0.52	0.572			0.406857	0.350857	0.344857	0.336857	0.354857	0.364857	0.416857	0.368	0.0101555
20:00:09	27.7	0.562	0.507	0.496	0.493	0.51	0.521	0.573			0.406571	0.351571	0.340571	0.337571	0.354571	0.365571	0.417571	0.367714	0.0102937
20:05:09	27.6	0.562	0.509	0.497	0.494	0.512	0.522	0.569			0.406286	0.353286	0.341286	0.338286	0.356286	0.366286	0.413286	0.367857	0.0101028
20:10:09	27.6	0.56	0.509	0.498	0.495	0.512	0.523	0.568			0.404143	0.353143	0.342143	0.339143	0.356143	0.367143	0.412143	0.367714	0.00968647
20:15:09	27.6	0.56	0.51	0.498	0.495	0.513	0.524	0.568			0.403429	0.353429	0.341429	0.338429	0.356429	0.367429	0.411429	0.367429	0.00967356
20:20:09	27.6	0.561	0.511	0.5	0.496	0.514	0.524	0.568			0.404286	0.354286	0.343286	0.339286	0.357286	0.367286	0.411286	0.368143	0.00958703
20:25:09	27.6	0.561	0.511	0.501	0.498	0.513	0.525	0.569			0.404143	0.354143	0.344143	0.341143	0.356143	0.368143	0.412143	0.368571	0.00941777
20:30:09	27.6	0.561	0.512	0.503	0.499	0.514	0.522	0.569			0.403571	0.354571	0.345571	0.341571	0.356571	0.364571	0.411571	0.368286	0.00913145
20:35:09	27.6	0.561	0.508	0.503	0.5	0.514	0.523	0.568			0.404143	0.351143	0.346143	0.343143	0.357143	0.366143	0.411143	0.368429	0.00919934
20:40:09	27.7	0.562	0.509	0.504	0.5	0.515	0.523	0.568			0.404857	0.351857	0.346857	0.342857	0.357857	0.365857	0.410857	0.368714	0.00924992
20:45:09	27.6	0.562	0.51	0.506	0.501	0.516	0.525	0.569			0.406571	0.354571	0.350571	0.345571	0.360571	0.369571	0.413571	0.371571	0.00905907
20:50:09	27.6	0.56	0.508	0.505	0.499	0.507	0.525	0.568			0.405857	0.353857	0.350857	0.344857	0.352857	0.370857	0.413857	0.370429	0.00924001
20:55:09	27.6	0.561	0.509	0.507	0.501	0.509	0.526	0.569			0.407714	0.355714	0.353714	0.347714	0.355714	0.372714	0.415714	0.372714	0.00909365
21:00:09	27.6	0.562	0.51	0.508	0.502	0.51	0.528	0.563			0.411857	0.359857	0.357857	0.351857	0.359857	0.377857	0.412857	0.376	0.0091214
21:05:09	27.6	0.562	0.511	0.509	0.502	0.511	0.528	0.56			0.411857	0.360857	0.358857	0.351857	0.360857	0.377857	0.409857	0.376	0.00900648
21:10:09	27.6	0.563	0.512	0.51	0.502	0.511	0.529	0.561			0.414571	0.363571	0.361571	0.353571	0.362571	0.380571	0.412571	0.378429	0.00911196
21:15:09	27.6	0.563	0.513	0.512	0.503	0.512	0.529	0.559			0.414571	0.364571	0.363571	0.354571	0.363571	0.380571	0.410571	0.378857	0.00889194
21:20:09	27.6	0.564	0.515	0.513	0.504	0.515	0.531	0.561			0.415143	0.366143	0.364143	0.355143	0.366143	0.382143	0.412143	0.380143	0.00881539
21:25:09	27.6	0.563	0.514	0.513	0.505	0.516	0.532	0.56			0.413714	0.364714	0.363714	0.355714	0.366714	0.382714	0.410714	0.379714	0.00862329
21:30:09	27.6	0.564	0.515	0.515	0.505	0.515	0.533	0.558			0.414429	0.365429	0.365429	0.355429	0.365429	0.383429	0.408429	0.379714	0.00872449
21:35:09	27.6	0.564	0.516	0.515	0.505	0.515	0.532	0.558			0.414714	0.366714	0.365714	0.355714	0.365714	0.382714	0.408714	0.38	0.00865929
21:40:09	27.6	0.563	0.517	0.516	0.506	0.516	0.534	0.558			0.413714	0.367714	0.366714	0.356714	0.366714	0.384714	0.408714	0.380714	0.00838915
21:45:09	27.6	0.564	0.519	0.518	0.507	0.517	0.535	0.557			0.414429	0.369429	0.368429	0.357429	0.367429	0.385429	0.407429	0.381429	0.00832132
21:50:09	27.6	0.564	0.519	0.518	0.508	0.519	0.536	0.558			0.414	0.369	0.368	0.358	0.369	0.386	0.408	0.381714	0.00820433
21:55:09	27.6	0.565	0.521	0.518	0.509	0.52	0.537	0.558			0.414714	0.370714	0.367714	0.358714	0.369714	0.386714	0.407714	0.382286	0.00821246
22:00:09	27.6	0.566	0.521	0.519	0.51	0.519	0.538	0.558			0.415714	0.370714	0.368714	0.359714	0.368714	0.387714	0.407714	0.382714	0.00831632
22:05:09	27.6	0.566	0.522	0.52	0.51	0.518	0.54	0.558			0.415143	0.371143	0.369143	0.359143	0.367143	0.389143	0.407143	0.382571	0.00836926
22:10:09	27.6	0.567	0.524	0.52	0.51	0.52	0.54	0.559			0.416143	0.373143	0.369143	0.359143	0.369143	0.389143	0.408143	0.383429	0.00837622
22:15:09	27.6	0.567	0.525	0.521	0.511	0.52	0.542	0.559			0.415429	0.373429	0.369429	0.359429	0.368429	0.390429	0.407429	0.383429	0.00831465
22:20:09	27.6	0.568	0.525	0.521	0.512	0.521	0.542	0.559			0.418429	0.375429	0.371429	0.362429	0.371429	0.392429	0.409429	0.385857	0.00833767
22:25:09	27.6	0.569	0.527	0.523	0.513	0.522	0.543	0.56			0.419429	0.377429	0.373429	0.363429	0.372429	0.393429	0.410429	0.387143	0.00827211
22:30:09	27.6	0.569	0.528	0.524	0.514	0.523	0.544	0.559			0.419143	0.378143	0.374143	0.364143	0.373143	0.394143	0.409143	0.387429	0.00812677
22:35:09	27.6	0.568	0.529	0.525	0.515	0.523	0.544	0.559			0.42	0.381	0.377	0.367	0.375	0.396	0.411	0.389571	0.00784007
22:40:09	27.6	0.569	0.53	0.525	0.516	0.524	0.546	0.56			0.420571	0.381571	0.376571	0.367571	0.375571	0.397571	0.411571	0.390143	0.00792465
22:45:09	27.6	0.569	0.531	0.526	0.517	0.525	0.546	0.56			0.420286	0.382286	0.377286	0.368286	0.376286	0.397286	0.411286	0.390429	0.00773592
22:50:09	27.6	0.569	0.531	0.526	0.518	0.525	0.547	0.56			0.42	0.382	0.377	0.369	0.376	0.398	0.411	0.390429	0.00770281
22:55:09	27.6	0.57	0.531	0.527	0.52	0.526	0.548	0.561			0.421	0.382	0.378	0.371	0.377	0.399	0.412	0.391429	0.00765071
23:00:09	27.6	0.571	0.533	0.529	0.521	0.528	0.549	0.562			0.421714	0.383714	0.379714	0.371714	0.378714	0.399714	0.412714	0.392571	0.00753547
23:05:09	27.6	0.571	0.534	0.53	0.522	0.528	0.55	0.563			0.421429	0.384429	0.380429	0.372429	0.378429	0.400429	0.413429	0.393	0.0074405
23:10:09	27.6	0.572	0.534	0.53	0.522	0.529	0.55	0.563			0.423429	0.385429	0.381429	0.373429	0.380429	0.401429	0.414429	0.394286	0.00753547
23:15:09	27.6	0.573	0.535	0.532	0.524	0.53	0.55	0.563			0.424571	0.386571	0.383571	0.375571	0.381571	0.401571	0.414571	0.395429	0.00737413
23:20:09	27.6	0.573	0.536	0.532	0.525	0.531	0.552	0.563			0.426143	0.389143	0.385143	0.378143	0.384143	0.405143	0.416143	0.397714	0.00731551
23:25:09	27.6	0.573	0.536	0.533	0.525	0.53	0.553	0.562			0.425857	0.388857	0.385857	0.377857	0.382857	0.405857	0.414857	0.397429	0.00737413
23:30:09	27.6	0.574	0.537	0.534	0.526	0.531	0.551	0.562			0.426429	0.389429	0.386429	0.378429	0.383429	0.403429	0.414429	0.397429	0.0072361
23:35:09	27.6	0.574	0.538	0.535	0.527	0.529	0.549	0.564			0.429	0.393	0.39	0.382	0.384	0.404	0.419	0.400143	0.00714609
23:40:09	27.6	0.575	0.54	0.536	0.528	0.53	0.55	0.565			0.430286	0.395286	0.391286	0.383286	0.385286	0.405286	0.420286	0.401571	0.00712936
23:45:09	27.6	0.576	0.54	0.536	0.528	0.531	0.55	0.565			0.431143	0.395143	0.391143	0.383143	0.386143	0.405143	0.420143	0.401714	0.00721919
23:50:09	27.6	0.576	0.541	0.536	0.529	0.531	0.551	0.566			0.431429	0.396429	0.391429	0.384429	0.386429	0.406429	0.421429	0.402571	0.00716473
23:55:09	27.6	0.577	0.541	0.538	0.53	0.532	0.552	0.565			0.432	0.396	0.393	0.385	0.387	0.407	0.42	0.402857	0.00714609
1 day, 0:00:09	27.6	0.578	0.541	0.535	0.531	0.532	0.553	0.566			0.432714	0.395714	0.389714	0.385714	0.386714	0.407714	0.420714	0.402714	0.00738015
1 day, 0:05:09	27.6	0.578	0.542	0.537	0.532	0.534	0.554	0.566			0.432429	0.396429	0.391429	0.386429	0.388429	0.408429	0.420429	0.403429	0.00712936
1 day, 0:10:09	27.6	0.578	0.542	0.537	0.533	0.534	0.554	0.566			0.432286	0.396286	0.391286	0.387286	0.388286	0.408286	0.420286	0.403429	0.00706478
1 day, 0:15:09	27.6	0.576	0.543	0.537	0.533	0.534	0.554	0.566			0.432857	0.399857	0.393857	0.389857	0.390857	0.410857	0.422857	0.405857	0.0067499
1 day, 0:20:09	27.6	0.577	0.543	0.539	0.534	0.535	0.555	0.566			0.433857	0.399857	0.395857	0.390857	0.391857	0.411857	0.422857	0.406714	0.00672516
1 day, 0:25:09	27.6	0.578	0.544	0.54	0.535	0.536	0.556	0.567			0.434571	0.400571	0.396571	0.391571	0.392571	0.412571	0.423571	0.407429	0.00672516
1 day, 0:30:09	27.6	0.578	0.545	0.54	0.535	0.536	0.556	0.567			0.434429	0.401429	0.396429	0.391429	0.392429	0.412429	0.423429	0.407429	0.00670655
1 day, 0:35:09	27.6	0.579	0.546	0.541	0.536	0.537	0.555	0.567			0.439857	0.406857	0.401857	0.396857	0.397857	0.415857	0.427857	0.412429	0.00663827
1 day, 0:40:09	27.6	0.578	0.546	0.543	0.536	0.538	0.553	0.568			0.438714	0.406714	0.403714	0.396714	0.398714	0.413714	0.428714	0.412429	0.00630344
1 day, 0:45:09	27.6	0.579	0.548	0.541	0.537	0.539	0.553	0.569			0.439143	0.408143	0.401143	0.397143	0.399143	0.413143	0.429143	0.412429	0.00638618
1 day, 0:50:09	27.6	0.58	0.549	0.542	0.538	0.539	0.554	0.569			0.44	0.409	0.402	0.398	0.399	0.414	0.429	0.413	0.00644291
1 day, 0:55:09	27.6	0.58	0.549	0.543	0.538	0.54	0.554	0.569			0.439571	0.408571	0.402571	0.397571	0.399571	0.413571	0.428571	0.412857	0.00634385
1 day, 1:00:09	27.7	0.581	0.55	0.544	0.54	0.54	0.554	0.565			0.440571	0.409571	0.403571	0.399571	0.399571	0.413571	0.424571	0.413	0.00632324

## Sheet: M9_med_con
Time	T° 600	C3	C5	E2	E4	E6	G3	G5	Mean	SE
00:00:09	27.1	0.101	0.104	0.119	0.11	0.104	0.109	0.106	0.107571	0.00223455
00:05:09	27.2	0.101	0.104	0.118	0.109	0.104	0.109	0.106	0.107286	0.00208982
00:10:09	27.2	0.101	0.104	0.118	0.109	0.105	0.11	0.106	0.107571	0.00208003
00:15:09	27.3	0.101	0.104	0.118	0.109	0.104	0.109	0.106	0.107286	0.00208982
00:20:09	27.3	0.101	0.104	0.118	0.109	0.104	0.109	0.106	0.107286	0.00208982
00:25:09	27.3	0.101	0.104	0.118	0.109	0.104	0.109	0.106	0.107286	0.00208982
00:30:09	27.3	0.101	0.104	0.117	0.109	0.105	0.109	0.106	0.107286	0.00193605
00:35:09	27.4	0.1	0.103	0.117	0.109	0.104	0.109	0.106	0.106857	0.00208656
00:40:09	27.4	0.101	0.104	0.117	0.109	0.105	0.109	0.106	0.107286	0.00193605
00:45:09	27.4	0.1	0.104	0.117	0.108	0.104	0.109	0.106	0.106857	0.00202871
00:50:09	27.5	0.101	0.104	0.117	0.108	0.105	0.109	0.106	0.107143	0.00192018
00:55:09	27.5	0.101	0.104	0.117	0.108	0.104	0.109	0.106	0.107	0.0019518
01:00:09	27.5	0.1	0.104	0.117	0.108	0.104	0.109	0.107	0.107	0.00202367
01:05:09	27.5	0.1	0.104	0.117	0.109	0.105	0.11	0.108	0.107571	0.00203373
01:10:09	27.5	0.1	0.106	0.119	0.11	0.107	0.112	0.11	0.109143	0.00220852
01:15:09	27.5	0.101	0.107	0.121	0.112	0.11	0.114	0.112	0.111	0.00232993
01:20:09	27.5	0.101	0.109	0.123	0.114	0.112	0.116	0.114	0.112714	0.00254216
01:25:09	27.5	0.102	0.112	0.125	0.116	0.114	0.118	0.117	0.114857	0.0026406
01:30:09	27.5	0.104	0.115	0.128	0.118	0.117	0.121	0.119	0.117429	0.00273302
01:35:09	27.5	0.106	0.116	0.13	0.122	0.12	0.123	0.122	0.119857	0.0027982
01:40:09	27.5	0.108	0.119	0.131	0.124	0.123	0.125	0.124	0.122	0.00269037
01:45:09	27.5	0.11	0.122	0.134	0.127	0.125	0.127	0.126	0.124429	0.00276765
01:50:09	27.5	0.112	0.124	0.135	0.128	0.127	0.129	0.128	0.126143	0.00266752
01:55:09	27.5	0.115	0.125	0.137	0.131	0.129	0.13	0.13	0.128143	0.00256746
02:00:09	27.5	0.116	0.127	0.138	0.132	0.13	0.132	0.132	0.129571	0.00258067
02:05:09	27.5	0.117	0.128	0.14	0.133	0.132	0.133	0.133	0.130857	0.00266752
02:10:09	27.5	0.118	0.129	0.141	0.134	0.134	0.135	0.134	0.132143	0.00270298
02:15:09	27.5	0.12	0.13	0.142	0.135	0.136	0.136	0.135	0.133429	0.00259906
02:20:09	27.5	0.121	0.132	0.143	0.136	0.136	0.137	0.137	0.134571	0.00257143
02:25:09	27.5	0.122	0.132	0.144	0.137	0.137	0.138	0.138	0.135429	0.00259906
02:30:09	27.5	0.123	0.134	0.145	0.138	0.138	0.138	0.139	0.136429	0.00255284
02:35:09	27.5	0.124	0.136	0.146	0.138	0.14	0.139	0.14	0.137571	0.0025435
02:40:09	27.5	0.124	0.136	0.146	0.139	0.141	0.14	0.141	0.138143	0.00261341
02:45:09	27.5	0.125	0.136	0.147	0.138	0.141	0.14	0.142	0.138429	0.00258988
02:50:09	27.5	0.125	0.137	0.147	0.138	0.141	0.141	0.141	0.138571	0.00256215
02:55:09	27.5	0.125	0.137	0.147	0.138	0.142	0.141	0.141	0.138714	0.00258857
03:00:09	27.5	0.125	0.137	0.147	0.138	0.141	0.141	0.14	0.138429	0.0025435
03:05:09	27.5	0.126	0.136	0.147	0.139	0.141	0.142	0.14	0.138714	0.0024661
03:10:09	27.5	0.126	0.136	0.147	0.139	0.141	0.14	0.14	0.138429	0.00241875
03:15:09	27.5	0.126	0.137	0.146	0.139	0.141	0.141	0.14	0.138571	0.00233867
03:20:09	27.6	0.126	0.136	0.147	0.139	0.14	0.141	0.138	0.138143	0.00240464
03:25:09	27.6	0.127	0.135	0.146	0.138	0.14	0.141	0.138	0.137857	0.00221927
03:30:09	27.6	0.126	0.133	0.146	0.139	0.139	0.142	0.137	0.137429	0.00243836
03:35:09	27.6	0.127	0.132	0.147	0.138	0.139	0.141	0.136	0.137143	0.00242437
03:40:09	27.6	0.127	0.132	0.147	0.138	0.139	0.141	0.136	0.137143	0.00242437
03:45:09	27.6	0.127	0.131	0.145	0.138	0.138	0.141	0.135	0.136429	0.0022872
03:50:09	27.6	0.127	0.13	0.145	0.135	0.138	0.141	0.134	0.135714	0.00234738
03:55:09	27.6	0.127	0.131	0.146	0.136	0.137	0.142	0.135	0.136286	0.00240747
04:00:09	27.6	0.126	0.131	0.145	0.136	0.137	0.142	0.136	0.136143	0.00240464
04:05:09	27.6	0.127	0.131	0.146	0.136	0.138	0.141	0.136	0.136429	0.00235895
04:10:09	27.6	0.126	0.131	0.146	0.136	0.138	0.14	0.134	0.135857	0.00243417
04:15:09	27.6	0.124	0.131	0.146	0.137	0.138	0.14	0.133	0.135571	0.00266241
04:20:09	27.6	0.125	0.131	0.145	0.137	0.136	0.138	0.134	0.135143	0.00234448
04:25:09	27.6	0.125	0.13	0.144	0.137	0.135	0.138	0.134	0.134714	0.00228571
04:30:09	27.6	0.125	0.13	0.144	0.137	0.135	0.137	0.133	0.134429	0.00226629
04:35:09	27.6	0.126	0.129	0.143	0.136	0.135	0.137	0.134	0.134286	0.00208982
04:40:09	27.6	0.125	0.128	0.142	0.136	0.134	0.136	0.131	0.133143	0.00214286
04:45:09	27.6	0.125	0.128	0.143	0.134	0.133	0.136	0.132	0.133	0.00218218
04:50:09	27.6	0.125	0.129	0.142	0.134	0.133	0.136	0.133	0.133143	0.00201694
04:55:09	27.6	0.125	0.128	0.141	0.134	0.134	0.136	0.134	0.133143	0.0019812
05:00:09	27.6	0.125	0.127	0.141	0.133	0.134	0.136	0.134	0.132857	0.00204041
05:05:09	27.6	0.124	0.128	0.14	0.133	0.135	0.135	0.133	0.132571	0.00196223
05:10:09	27.6	0.124	0.127	0.14	0.131	0.134	0.135	0.133	0.132	0.002
05:15:09	27.6	0.124	0.127	0.14	0.13	0.133	0.134	0.133	0.131571	0.00196223		The small change in OD is due to small amounts of condensation and evaporation
05:20:09	27.6	0.123	0.127	0.14	0.129	0.131	0.134	0.133	0.131	0.00205866
05:25:09	27.6	0.123	0.128	0.139	0.128	0.131	0.134	0.132	0.130714	0.00192372
05:30:09	27.6	0.123	0.126	0.138	0.128	0.128	0.134	0.13	0.129571	0.00190059
05:35:09	27.6	0.123	0.126	0.138	0.127	0.128	0.134	0.13	0.129429	0.00192548
05:40:09	27.6	0.123	0.126	0.137	0.126	0.129	0.134	0.13	0.129286	0.00184796
05:45:09	27.6	0.122	0.126	0.137	0.126	0.128	0.134	0.129	0.128857	0.00193254
05:50:09	27.6	0.122	0.126	0.136	0.126	0.127	0.134	0.13	0.128714	0.0018608
05:55:09	27.6	0.121	0.126	0.136	0.126	0.126	0.131	0.129	0.127857	0.00179189
06:00:09	27.6	0.121	0.126	0.135	0.126	0.125	0.131	0.129	0.127571	0.00171627
06:05:09	27.6	0.12	0.126	0.135	0.125	0.125	0.131	0.128	0.127143	0.00181827
06:10:09	27.6	0.12	0.124	0.134	0.126	0.125	0.131	0.129	0.127	0.00177281
06:15:09	27.6	0.12	0.124	0.133	0.126	0.123	0.131	0.128	0.126429	0.00173009
06:20:09	27.6	0.12	0.124	0.133	0.127	0.124	0.131	0.127	0.126571	0.00167413
06:25:09	27.6	0.119	0.123	0.133	0.126	0.124	0.131	0.127	0.126143	0.00180513
06:30:08	27.6	0.119	0.122	0.133	0.126	0.122	0.131	0.128	0.125857	0.00194482
06:35:09	27.6	0.119	0.122	0.133	0.126	0.122	0.131	0.125	0.125429	0.00191308
06:40:09	27.6	0.119	0.122	0.132	0.126	0.12	0.128	0.123	0.124286	0.00175546
06:45:09	27.6	0.119	0.121	0.132	0.125	0.12	0.127	0.124	0.124	0.00171825
06:50:09	27.6	0.119	0.122	0.132	0.125	0.12	0.127	0.123	0.124	0.00169031
06:55:09	27.6	0.119	0.121	0.13	0.125	0.12	0.127	0.122	0.123429	0.0015253
07:00:09	27.6	0.12	0.121	0.129	0.126	0.121	0.125	0.122	0.123429	0.00125085
07:05:09	27.6	0.12	0.122	0.129	0.126	0.121	0.124	0.122	0.123429	0.00119238
07:10:09	27.6	0.12	0.122	0.129	0.125	0.121	0.124	0.122	0.123286	0.00114879
07:15:09	27.6	0.12	0.121	0.129	0.125	0.121	0.123	0.123	0.123143	0.0011635
07:20:09	27.6	0.121	0.122	0.13	0.125	0.122	0.124	0.123	0.123857	0.00114286
07:25:09	27.6	0.121	0.122	0.13	0.126	0.12	0.124	0.122	0.123571	0.00130671
07:30:09	27.6	0.12	0.123	0.13	0.125	0.121	0.123	0.122	0.123429	0.00125085
07:35:09	27.6	0.119	0.123	0.13	0.125	0.121	0.123	0.122	0.123286	0.00132223
07:40:09	27.6	0.12	0.121	0.131	0.124	0.122	0.123	0.121	0.123143	0.00140456
07:45:09	27.6	0.119	0.122	0.131	0.124	0.122	0.123	0.121	0.123143	0.00143806
07:50:09	27.6	0.118	0.122	0.131	0.123	0.122	0.123	0.122	0.123	0.00148003
07:55:09	27.6	0.117	0.121	0.131	0.124	0.121	0.123	0.122	0.122714	0.00161414
08:00:09	27.6	0.118	0.122	0.129	0.122	0.119	0.123	0.123	0.122286	0.00134012
08:05:09	27.6	0.118	0.122	0.13	0.12	0.12	0.123	0.123	0.122286	0.0014592
08:10:09	27.6	0.118	0.122	0.13	0.12	0.12	0.122	0.123	0.122143	0.00145453
08:15:09	27.6	0.117	0.121	0.13	0.121	0.116	0.122	0.123	0.121429	0.00173009
08:20:09	27.6	0.116	0.12	0.128	0.121	0.116	0.12	0.122	0.120429	0.00154083
08:25:09	27.6	0.116	0.118	0.128	0.121	0.116	0.12	0.123	0.120286	0.00161414
08:30:09	27.6	0.116	0.117	0.126	0.121	0.116	0.121	0.123	0.12	0.00144749
08:35:09	27.6	0.116	0.117	0.126	0.121	0.116	0.121	0.123	0.12	0.00144749
08:40:09	27.7	0.116	0.118	0.127	0.121	0.116	0.121	0.123	0.120286	0.00150735
08:45:09	27.7	0.117	0.118	0.127	0.121	0.116	0.121	0.123	0.120429	0.00144514
08:50:09	27.7	0.116	0.117	0.126	0.122	0.117	0.122	0.123	0.120429	0.00142857
08:55:09	27.7	0.116	0.117	0.126	0.12	0.116	0.122	0.123	0.12	0.00146385
09:00:09	27.7	0.116	0.117	0.127	0.121	0.116	0.12	0.123	0.12	0.00154303
09:05:09	27.7	0.116	0.117	0.127	0.12	0.117	0.12	0.123	0.12	0.00148003
09:10:09	27.7	0.114	0.117	0.127	0.12	0.117	0.121	0.124	0.12	0.00169031
09:15:09	27.7	0.114	0.117	0.127	0.12	0.117	0.12	0.123	0.119714	0.00162882
09:20:09	27.7	0.115	0.117	0.127	0.119	0.117	0.121	0.124	0.12	0.00161835
09:25:09	27.7	0.114	0.117	0.126	0.119	0.117	0.121	0.124	0.119714	0.00159932
09:30:09	27.7	0.114	0.118	0.127	0.119	0.118	0.121	0.123	0.12	0.00157359
09:35:09	27.7	0.114	0.118	0.127	0.119	0.118	0.121	0.122	0.119857	0.00153419
09:40:09	27.7	0.115	0.118	0.127	0.119	0.119	0.12	0.123	0.120143	0.00145453
09:45:09	27.7	0.114	0.116	0.126	0.12	0.116	0.12	0.123	0.119286	0.00161414
09:50:09	27.7	0.115	0.116	0.126	0.12	0.115	0.12	0.124	0.119429	0.00165985
09:55:09	27.7	0.115	0.116	0.126	0.12	0.114	0.12	0.121	0.118857	0.00158006
10:00:09	27.7	0.116	0.116	0.126	0.12	0.113	0.121	0.12	0.118857	0.00160992
10:05:09	27.7	0.116	0.117	0.127	0.121	0.114	0.12	0.12	0.119286	0.00159932
10:10:09	27.7	0.115	0.117	0.126	0.119	0.114	0.119	0.12	0.118571	0.00149375
10:15:09	27.7	0.115	0.117	0.126	0.119	0.114	0.119	0.12	0.118571	0.00149375
10:20:09	27.7	0.114	0.117	0.125	0.12	0.114	0.119	0.121	0.118571	0.00149375
10:25:09	27.7	0.114	0.117	0.125	0.12	0.115	0.119	0.121	0.118714	0.00142619
10:30:09	27.7	0.114	0.118	0.125	0.12	0.115	0.12	0.121	0.119	0.00141421
10:35:09	27.7	0.113	0.116	0.125	0.12	0.115	0.119	0.121	0.118429	0.00154083
10:40:09	27.7	0.114	0.116	0.125	0.121	0.115	0.119	0.119	0.118429	0.00144514
10:45:09	27.7	0.114	0.116	0.125	0.121	0.116	0.119	0.119	0.118571	0.00139484
10:50:09	27.7	0.114	0.116	0.126	0.121	0.116	0.119	0.119	0.118714	0.00150735
10:55:09	27.7	0.114	0.116	0.125	0.122	0.116	0.119	0.12	0.118857	0.00145453
11:00:09	27.7	0.114	0.115	0.125	0.121	0.116	0.12	0.12	0.118714	0.00147542
11:05:09	27.7	0.115	0.116	0.126	0.121	0.114	0.12	0.118	0.118571	0.00157143
11:10:09	27.7	0.115	0.115	0.126	0.121	0.114	0.12	0.118	0.118429	0.00161624
11:15:09	27.7	0.115	0.115	0.126	0.118	0.114	0.119	0.118	0.117857	0.00153419
11:20:09	27.7	0.116	0.116	0.125	0.116	0.115	0.119	0.118	0.117857	0.00129887
11:25:09	27.7	0.115	0.115	0.125	0.115	0.115	0.119	0.118	0.117429	0.00141181
11:30:09	27.7	0.115	0.116	0.125	0.115	0.115	0.119	0.119	0.117714	0.0013924
11:35:09	27.7	0.114	0.116	0.126	0.115	0.115	0.119	0.119	0.117714	0.00156926
11:40:09	27.7	0.113	0.116	0.124	0.115	0.115	0.119	0.119	0.117286	0.0013924
11:45:09	27.7	0.113	0.117	0.124	0.115	0.115	0.119	0.119	0.117429	0.00137766
11:50:09	27.7	0.113	0.116	0.124	0.115	0.115	0.12	0.12	0.117571	0.00146152
11:55:09	27.7	0.112	0.115	0.122	0.115	0.114	0.12	0.12	0.116857	0.00142141
12:00:09	27.7	0.112	0.114	0.122	0.116	0.115	0.12	0.12	0.117	0.00139728
12:05:09	27.7	0.111	0.114	0.122	0.116	0.114	0.12	0.12	0.116714	0.00152307
12:10:09	27.7	0.11	0.114	0.122	0.116	0.115	0.12	0.12	0.116714	0.00158436
12:15:09	27.7	0.11	0.114	0.122	0.116	0.114	0.121	0.12	0.116714	0.0016721
12:20:09	27.7	0.11	0.114	0.122	0.116	0.114	0.121	0.121	0.116857	0.00172418
12:25:09	27.7	0.11	0.114	0.122	0.116	0.115	0.121	0.122	0.117143	0.00175158
12:30:09	27.7	0.11	0.114	0.122	0.116	0.115	0.121	0.121	0.117	0.00169031
12:35:09	27.7	0.111	0.114	0.122	0.116	0.115	0.121	0.122	0.117286	0.0016578
12:40:09	27.7	0.111	0.114	0.122	0.116	0.115	0.121	0.121	0.117143	0.00159506
12:45:09	27.7	0.111	0.113	0.122	0.117	0.116	0.122	0.121	0.117429	0.00167413
12:50:09	27.7	0.111	0.113	0.122	0.117	0.116	0.122	0.121	0.117429	0.00167413
12:55:09	27.7	0.111	0.113	0.122	0.117	0.114	0.122	0.121	0.117143	0.00173793
13:00:09	27.7	0.112	0.113	0.122	0.117	0.115	0.122	0.121	0.117429	0.00161624
13:05:09	27.7	0.112	0.113	0.122	0.117	0.115	0.123	0.12	0.117429	0.00164544
13:10:09	27.7	0.112	0.113	0.122	0.117	0.115	0.123	0.12	0.117429	0.00164544
13:15:09	27.7	0.111	0.114	0.122	0.117	0.115	0.123	0.12	0.117429	0.00167413
13:20:09	27.7	0.112	0.113	0.123	0.118	0.116	0.123	0.121	0.118	0.00171825
13:25:09	27.7	0.112	0.114	0.122	0.118	0.114	0.123	0.121	0.117714	0.0016721
13:30:09	27.7	0.111	0.114	0.122	0.118	0.115	0.122	0.121	0.117571	0.00164544
13:35:09	27.7	0.111	0.114	0.123	0.118	0.115	0.122	0.121	0.117714	0.00171429
13:40:09	27.7	0.111	0.114	0.123	0.118	0.115	0.122	0.122	0.117857	0.00176512
13:45:09	27.7	0.112	0.114	0.123	0.118	0.116	0.123	0.122	0.118286	0.00170034
13:50:09	27.7	0.112	0.114	0.123	0.119	0.116	0.121	0.122	0.118143	0.00159506
13:55:09	27.7	0.112	0.114	0.123	0.119	0.116	0.121	0.122	0.118143	0.00159506
14:00:09	27.7	0.112	0.115	0.124	0.119	0.116	0.121	0.122	0.118429	0.00161624
14:05:09	27.7	0.112	0.115	0.124	0.119	0.116	0.121	0.122	0.118429	0.00161624
14:10:09	27.7	0.112	0.115	0.124	0.119	0.116	0.122	0.123	0.118714	0.00171429
14:15:09	27.7	0.112	0.115	0.124	0.119	0.117	0.122	0.123	0.118857	0.00168224
14:20:09	27.7	0.113	0.115	0.124	0.119	0.117	0.122	0.123	0.119	0.00158865
14:25:09	27.7	0.113	0.115	0.124	0.119	0.117	0.122	0.124	0.119143	0.00165369
14:30:09	27.7	0.113	0.115	0.124	0.12	0.118	0.122	0.123	0.119286	0.00156926
14:35:09	27.7	0.113	0.115	0.124	0.12	0.118	0.122	0.12	0.118857	0.00145453
14:40:09	27.7	0.113	0.116	0.125	0.12	0.118	0.122	0.12	0.119143	0.0014869
14:45:09	27.7	0.114	0.116	0.125	0.12	0.118	0.122	0.12	0.119286	0.0013924
14:50:09	27.7	0.113	0.116	0.125	0.12	0.119	0.122	0.121	0.119429	0.00149375
14:55:09	27.7	0.114	0.116	0.125	0.121	0.119	0.122	0.121	0.119714	0.0014094
15:00:09	27.7	0.114	0.116	0.125	0.121	0.119	0.123	0.121	0.119857	0.00145453
15:05:09	27.7	0.114	0.116	0.126	0.121	0.12	0.123	0.121	0.120143	0.00153419
15:10:09	27.7	0.114	0.117	0.126	0.121	0.12	0.123	0.121	0.120286	0.00147542
15:15:09	27.7	0.115	0.117	0.126	0.121	0.12	0.123	0.122	0.120571	0.00139484
15:20:09	27.7	0.114	0.117	0.126	0.121	0.121	0.123	0.122	0.120571	0.00149375
15:25:09	27.7	0.115	0.117	0.126	0.121	0.121	0.124	0.122	0.120857	0.00143806
15:30:09	27.7	0.115	0.117	0.126	0.121	0.122	0.124	0.123	0.121143	0.0014708
15:35:09	27.7	0.115	0.118	0.126	0.121	0.122	0.124	0.119	0.120714	0.0014094
15:40:09	27.7	0.115	0.118	0.127	0.121	0.122	0.124	0.119	0.120857	0.00150283
15:45:09	27.7	0.116	0.118	0.127	0.116	0.122	0.124	0.119	0.120286	0.00158436
15:50:09	27.7	0.116	0.118	0.127	0.116	0.121	0.124	0.119	0.120143	0.00156492
15:55:09	27.7	0.116	0.119	0.127	0.116	0.122	0.125	0.119	0.120571	0.00161624
16:00:09	27.7	0.116	0.119	0.128	0.116	0.122	0.125	0.116	0.120286	0.00183503
16:05:09	27.7	0.116	0.119	0.128	0.116	0.12	0.125	0.116	0.12	0.00181265
16:10:09	27.7	0.117	0.12	0.128	0.116	0.121	0.125	0.116	0.120429	0.00175739
16:15:09	27.7	0.116	0.12	0.128	0.116	0.121	0.124	0.116	0.120143	0.00175158
16:20:09	27.7	0.117	0.119	0.128	0.117	0.121	0.124	0.116	0.120286	0.0016578
16:25:09	27.7	0.117	0.119	0.129	0.117	0.122	0.124	0.116	0.120571	0.00178429
16:30:09	27.7	0.116	0.12	0.128	0.117	0.122	0.125	0.116	0.120571	0.00177089
16:35:09	27.7	0.117	0.12	0.129	0.117	0.122	0.125	0.117	0.121	0.00175933
16:40:09	27.7	0.116	0.118	0.129	0.117	0.122	0.125	0.116	0.120429	0.00191308
16:45:09	27.7	0.117	0.118	0.129	0.117	0.122	0.125	0.117	0.120714	0.0018089
16:50:09	27.7	0.113	0.118	0.13	0.117	0.123	0.126	0.117	0.120571	0.00225576
16:55:09	27.7	0.113	0.118	0.13	0.117	0.123	0.126	0.117	0.120571	0.00225576
17:00:09	27.6	0.113	0.118	0.13	0.117	0.123	0.126	0.117	0.120571	0.00225576
17:05:09	27.6	0.113	0.119	0.13	0.117	0.123	0.127	0.117	0.120857	0.00229314
17:10:09	27.6	0.113	0.119	0.131	0.117	0.124	0.123	0.117	0.120571	0.00224518
17:15:09	27.7	0.113	0.119	0.129	0.117	0.124	0.123	0.117	0.120286	0.00203206
17:20:09	27.6	0.113	0.119	0.129	0.117	0.124	0.123	0.117	0.120286	0.00203206
17:25:09	27.6	0.113	0.119	0.129	0.117	0.125	0.125	0.117	0.120714	0.0021571
17:30:09	27.7	0.113	0.12	0.13	0.117	0.125	0.124	0.117	0.120857	0.00219771
17:35:09	27.6	0.113	0.12	0.13	0.118	0.126	0.125	0.117	0.121286	0.00224366
17:40:09	27.6	0.114	0.12	0.13	0.118	0.126	0.125	0.118	0.121571	0.00211409
17:45:09	27.7	0.114	0.12	0.131	0.118	0.126	0.124	0.118	0.121571	0.00218062
17:50:09	27.7	0.114	0.121	0.131	0.118	0.127	0.125	0.119	0.122143	0.00220852
17:55:09	27.6	0.114	0.121	0.131	0.118	0.127	0.125	0.118	0.122	0.00224669
18:00:09	27.7	0.114	0.121	0.132	0.118	0.128	0.125	0.118	0.122286	0.00239756
18:05:09	27.6	0.114	0.121	0.126	0.118	0.128	0.126	0.118	0.121571	0.00197432
18:10:09	27.6	0.114	0.122	0.126	0.118	0.128	0.124	0.118	0.121429	0.00188802
18:15:09	27.6	0.114	0.122	0.126	0.118	0.128	0.124	0.118	0.121429	0.00188802
18:20:09	27.6	0.115	0.122	0.127	0.118	0.128	0.124	0.119	0.121857	0.00181827
18:25:09	27.6	0.114	0.122	0.127	0.119	0.128	0.124	0.118	0.121714	0.0019113
18:30:09	27.6	0.115	0.123	0.127	0.119	0.128	0.124	0.118	0.122	0.00182574
18:35:09	27.6	0.115	0.123	0.127	0.119	0.129	0.124	0.116	0.121857	0.00202871
18:40:09	27.7	0.115	0.12	0.127	0.119	0.129	0.125	0.117	0.121714	0.00200849
18:45:09	27.7	0.115	0.121	0.127	0.119	0.129	0.125	0.117	0.121857	0.00199319
18:50:09	27.6	0.115	0.121	0.128	0.119	0.13	0.125	0.117	0.122143	0.00214286
18:55:09	27.7	0.114	0.116	0.128	0.119	0.13	0.125	0.117	0.121286	0.00238761
19:00:09	27.6	0.114	0.116	0.126	0.12	0.13	0.126	0.117	0.121286	0.00229611
19:05:09	27.6	0.115	0.116	0.126	0.12	0.131	0.126	0.117	0.121571	0.00231822
19:10:09	27.6	0.115	0.116	0.126	0.12	0.131	0.126	0.117	0.121571	0.00231822
19:15:09	27.6	0.115	0.116	0.126	0.12	0.131	0.126	0.117	0.121571	0.00231822
19:20:09	27.6	0.115	0.117	0.127	0.12	0.131	0.127	0.117	0.122	0.00236039
19:25:09	27.6	0.115	0.117	0.126	0.12	0.13	0.127	0.117	0.121714	0.00222234
19:30:09	27.6	0.115	0.116	0.127	0.12	0.131	0.127	0.117	0.121857	0.00241453
19:35:09	27.6	0.115	0.117	0.127	0.12	0.131	0.127	0.118	0.122143	0.00231382
19:40:09	27.6	0.116	0.118	0.127	0.121	0.132	0.127	0.117	0.122571	0.00231822
19:45:09	27.6	0.115	0.118	0.127	0.121	0.131	0.128	0.117	0.122429	0.00234883
19:50:09	27.6	0.116	0.118	0.127	0.121	0.132	0.128	0.117	0.122714	0.00236758
19:55:09	27.6	0.116	0.119	0.127	0.121	0.132	0.129	0.117	0.123	0.00238048
20:00:09	27.7	0.116	0.118	0.127	0.121	0.133	0.129	0.117	0.123	0.00251661
20:05:09	27.6	0.116	0.119	0.128	0.121	0.133	0.129	0.118	0.123429	0.00245781
20:10:09	27.6	0.116	0.119	0.127	0.121	0.133	0.129	0.117	0.123143	0.00247298
20:15:09	27.6	0.116	0.119	0.127	0.119	0.134	0.129	0.118	0.123143	0.00257671
20:20:09	27.6	0.116	0.119	0.128	0.12	0.134	0.129	0.117	0.123286	0.00263416
20:25:09	27.6	0.116	0.119	0.127	0.12	0.134	0.129	0.118	0.123286	0.00254216
20:30:09	27.6	0.117	0.12	0.128	0.12	0.135	0.128	0.118	0.123714	0.00253278
20:35:09	27.6	0.117	0.12	0.128	0.12	0.135	0.129	0.117	0.123714	0.00263416
20:40:09	27.7	0.117	0.12	0.128	0.12	0.136	0.129	0.118	0.124	0.00268151
20:45:09	27.6	0.117	0.12	0.128	0.12	0.136	0.128	0.118	0.123857	0.0026406
20:50:09	27.6	0.117	0.12	0.128	0.12	0.136	0.128	0.118	0.123857	0.0026406
20:55:09	27.6	0.117	0.121	0.128	0.12	0.136	0.128	0.118	0.124	0.00260951
21:00:09	27.6	0.117	0.122	0.128	0.121	0.135	0.129	0.118	0.124286	0.00248533
21:05:09	27.6	0.117	0.119	0.128	0.121	0.135	0.129	0.118	0.123857	0.00258594
21:10:09	27.6	0.118	0.119	0.128	0.121	0.135	0.129	0.118	0.124	0.00252605
21:15:09	27.6	0.118	0.119	0.128	0.121	0.136	0.129	0.118	0.124143	0.00263157
21:20:09	27.6	0.114	0.12	0.128	0.121	0.136	0.13	0.118	0.123857	0.00291489
21:25:09	27.6	0.115	0.12	0.128	0.121	0.137	0.13	0.118	0.124143	0.0029393
21:30:09	27.6	0.115	0.12	0.129	0.121	0.137	0.13	0.118	0.124286	0.00297381
21:35:09	27.6	0.115	0.12	0.128	0.121	0.134	0.131	0.118	0.123857	0.00270298
21:40:09	27.6	0.116	0.119	0.129	0.121	0.127	0.131	0.118	0.123	0.00223607
21:45:09	27.6	0.115	0.119	0.129	0.122	0.127	0.131	0.118	0.123	0.00229907
21:50:09	27.6	0.116	0.119	0.129	0.122	0.127	0.131	0.119	0.123286	0.00216811
21:55:09	27.6	0.116	0.119	0.129	0.122	0.128	0.132	0.119	0.123571	0.00229759
22:00:09	27.6	0.115	0.119	0.129	0.122	0.128	0.132	0.119	0.123429	0.00237905
22:05:09	27.6	0.116	0.12	0.128	0.122	0.128	0.132	0.119	0.123571	0.00220235
22:10:09	27.6	0.116	0.12	0.128	0.122	0.129	0.133	0.119	0.123857	0.00234448
22:15:09	27.6	0.115	0.12	0.128	0.122	0.129	0.133	0.119	0.123714	0.00242717
22:20:09	27.6	0.116	0.12	0.128	0.122	0.129	0.134	0.119	0.124	0.00243975
22:25:09	27.6	0.116	0.12	0.128	0.122	0.129	0.134	0.119	0.124	0.00243975
22:30:09	27.6	0.115	0.119	0.129	0.122	0.129	0.132	0.119	0.123571	0.00242857
22:35:09	27.6	0.116	0.12	0.129	0.122	0.129	0.133	0.119	0.124	0.00239046
22:40:09	27.6	0.116	0.12	0.129	0.122	0.13	0.134	0.119	0.124286	0.00253278
22:45:09	27.6	0.116	0.12	0.129	0.122	0.127	0.134	0.119	0.123857	0.00240464
22:50:09	27.6	0.116	0.12	0.129	0.122	0.126	0.134	0.12	0.123857	0.0023343
22:55:09	27.6	0.116	0.12	0.129	0.123	0.126	0.135	0.12	0.124143	0.00242437
23:00:09	27.6	0.116	0.12	0.129	0.123	0.126	0.136	0.12	0.124286	0.00253278
23:05:09	27.6	0.116	0.12	0.129	0.123	0.126	0.135	0.12	0.124143	0.00242437
23:10:09	27.6	0.117	0.12	0.13	0.123	0.127	0.135	0.12	0.124571	0.00241875
23:15:09	27.6	0.117	0.12	0.129	0.123	0.126	0.136	0.12	0.124429	0.00245781
23:20:09	27.6	0.118	0.12	0.13	0.123	0.126	0.136	0.12	0.124714	0.00243696
23:25:09	27.6	0.118	0.12	0.13	0.123	0.127	0.136	0.12	0.124857	0.00245365
23:30:09	27.6	0.118	0.12	0.124	0.123	0.127	0.136	0.121	0.124143	0.00226178
23:35:09	27.6	0.118	0.12	0.124	0.124	0.126	0.137	0.121	0.124286	0.0023575
23:40:09	27.6	0.118	0.12	0.124	0.124	0.127	0.137	0.121	0.124429	0.00237905
23:45:09	27.6	0.119	0.12	0.124	0.124	0.127	0.139	0.12	0.124714	0.00261602
23:50:09	27.6	0.118	0.12	0.124	0.124	0.126	0.139	0.121	0.124571	0.00261732
23:55:09	27.6	0.119	0.121	0.124	0.124	0.126	0.139	0.121	0.124857	0.00252066
1 day, 0:00:09	27.6	0.119	0.121	0.124	0.124	0.127	0.139	0.121	0.125	0.00253546
1 day, 0:05:09	27.6	0.119	0.121	0.124	0.124	0.127	0.141	0.121	0.125286	0.00280063
1 day, 0:10:09	27.6	0.12	0.122	0.124	0.125	0.127	0.141	0.121	0.125714	0.0027055
1 day, 0:15:09	27.6	0.12	0.121	0.124	0.125	0.127	0.142	0.121	0.125714	0.00287613
1 day, 0:20:09	27.6	0.12	0.123	0.125	0.125	0.127	0.142	0.121	0.126143	0.0027982
1 day, 0:25:09	27.6	0.12	0.124	0.124	0.125	0.127	0.143	0.121	0.126286	0.00292538
1 day, 0:30:09	27.6	0.12	0.123	0.124	0.125	0.128	0.144	0.121	0.126429	0.00309267
1 day, 0:35:09	27.6	0.12	0.122	0.124	0.125	0.128	0.144	0.121	0.126286	0.00312223
1 day, 0:40:09	27.6	0.12	0.122	0.124	0.125	0.128	0.141	0.121	0.125857	0.00272054
1 day, 0:45:09	27.6	0.121	0.123	0.125	0.126	0.129	0.143	0.121	0.126857	0.00289851
1 day, 0:50:09	27.6	0.12	0.122	0.124	0.126	0.128	0.142	0.121	0.126143	0.0028488
1 day, 0:55:09	27.6	0.121	0.123	0.124	0.126	0.129	0.144	0.122	0.127	0.00300793
1 day, 1:00:09	27.7	0.121	0.123	0.125	0.126	0.129	0.145	0.122	0.127286	0.00312223

## Sheet: M9_SBW25
Time	T° 600	B2	B4	B6	D3	D5	F2	F4		raw data - medium control mean	B2	B4	B6	D3	D5	F2	F4	Mean	SE
00:00:09	27.1	0.117	0.115	0.109	0.11	0.108	0.108	0.108			0.00942857	0.00742857	0.00142857	0.00242857	0.000428571	0.000428571	0.000428571	0.00314286	0.0014094
00:05:09	27.2	0.113	0.115	0.11	0.109	0.109	0.108	0.108			0.00571429	0.00771429	0.00271429	0.00171429	0.00171429	0.000714286	0.000714286	0.003	0.00101686
00:10:09	27.2	0.113	0.115	0.11	0.116	0.11	0.109	0.108			0.00542857	0.00742857	0.00242857	0.00842857	0.00242857	0.00142857	0.000428571	0.004	0.00117224
00:15:09	27.3	0.113	0.115	0.109	0.111	0.11	0.109	0.109			0.00571429	0.00771429	0.00171429	0.00371429	0.00271429	0.00171429	0.00171429	0.00357143	0.000884485
00:20:09	27.3	0.112	0.115	0.109	0.111	0.109	0.11	0.109			0.00471429	0.00771429	0.00171429	0.00371429	0.00171429	0.00271429	0.00171429	0.00342857	0.000837066
00:25:09	27.3	0.112	0.115	0.109	0.111	0.11	0.109	0.11			0.00471429	0.00771429	0.00171429	0.00371429	0.00271429	0.00171429	0.00271429	0.00357143	0.00079966
00:30:09	27.3	0.112	0.115	0.108	0.113	0.11	0.11	0.11			0.00471429	0.00771429	0.000714286	0.00571429	0.00271429	0.00271429	0.00271429	0.00385714	0.000884485
00:35:09	27.4	0.112	0.115	0.109	0.115	0.11	0.11	0.111			0.00514286	0.00814286	0.00214286	0.00814286	0.00314286	0.00314286	0.00414286	0.00485714	0.000918443
00:40:09	27.4	0.112	0.115	0.108	0.111	0.11	0.11	0.111			0.00471429	0.00771429	0.000714286	0.00371429	0.00271429	0.00271429	0.00371429	0.00371429	0.000816497
00:45:09	27.4	0.113	0.115	0.11	0.111	0.11	0.111	0.111			0.00614286	0.00814286	0.00314286	0.00414286	0.00314286	0.00414286	0.00414286	0.00471429	0.000685119
00:50:09	27.5	0.114	0.115	0.109	0.111	0.11	0.111	0.111			0.00685714	0.00785714	0.00185714	0.00385714	0.00285714	0.00385714	0.00385714	0.00442857	0.00081232
00:55:09	27.5	0.114	0.115	0.11	0.112	0.11	0.11	0.111			0.007	0.008	0.003	0.005	0.003	0.003	0.004	0.00471429	0.000778102
01:00:09	27.5	0.114	0.115	0.11	0.111	0.11	0.11	0.11			0.007	0.008	0.003	0.004	0.003	0.003	0.003	0.00442857	0.00081232
01:05:09	27.5	0.114	0.115	0.11	0.113	0.111	0.111	0.113			0.00642857	0.00742857	0.00242857	0.00542857	0.00342857	0.00342857	0.00542857	0.00485714	0.000685119
01:10:09	27.5	0.114	0.115	0.111	0.114	0.113	0.113	0.114			0.00485714	0.00585714	0.00185714	0.00485714	0.00385714	0.00385714	0.00485714	0.00428571	0.000480929
01:15:09	27.5	0.114	0.116	0.112	0.116	0.115	0.114	0.115			0.003	0.005	0.001	0.005	0.004	0.003	0.004	0.00357143	0.000528121
01:20:09	27.5	0.114	0.117	0.114	0.117	0.117	0.116	0.117			0.00128571	0.00428571	0.00128571	0.00428571	0.00428571	0.00328571	0.00428571	0.00328571	0.000534522
01:25:09	27.5	0.114	0.119	0.117	0.119	0.119	0.118	0.121			-0.000857143	0.00414286	0.00214286	0.00414286	0.00414286	0.00314286	0.00614286	0.00328571	0.0008289
01:30:09	27.5	0.113	0.121	0.118	0.123	0.121	0.12	0.122			-0.00442857	0.00357143	0.000571429	0.00557143	0.00357143	0.00257143	0.00457143	0.00228571	0.00126706
01:35:09	27.5	0.114	0.124	0.122	0.125	0.124	0.122	0.124			-0.00585714	0.00414286	0.00214286	0.00514286	0.00414286	0.00214286	0.00414286	0.00228571	0.00142141
01:40:09	27.5	0.114	0.126	0.124	0.129	0.126	0.125	0.127			-0.008	0.004	0.002	0.007	0.004	0.003	0.005	0.00242857	0.00183689
01:45:09	27.5	0.114	0.128	0.126	0.13	0.128	0.127	0.129			-0.0104286	0.00357143	0.00157143	0.00557143	0.00357143	0.00257143	0.00457143	0.00157143	0.00205866
01:50:09	27.5	0.114	0.13	0.127	0.131	0.131	0.129	0.132			-0.0121429	0.00385714	0.000857143	0.00485714	0.00485714	0.00285714	0.00585714	0.00157143	0.00236758
01:55:09	27.5	0.114	0.131	0.129	0.133	0.133	0.131	0.132			-0.0141429	0.00285714	0.000857143	0.00485714	0.00485714	0.00285714	0.00385714	0.000857143	0.00255417
02:00:09	27.5	0.114	0.133	0.13	0.135	0.135	0.133	0.136			-0.0155714	0.00342857	0.000428571	0.00542857	0.00542857	0.00342857	0.00642857	0.00128571	0.00290671
02:05:09	27.5	0.114	0.134	0.131	0.137	0.137	0.134	0.135			-0.0168571	0.00314286	0.000142857	0.00614286	0.00614286	0.00314286	0.00414286	0.000857143	0.00305282
02:10:09	27.5	0.114	0.135	0.132	0.139	0.138	0.135	0.137			-0.0181429	0.00285714	-0.000142857	0.00685714	0.00585714	0.00285714	0.00485714	0.000714286	0.00326182
02:15:09	27.5	0.114	0.136	0.134	0.14	0.14	0.137	0.138			-0.0194286	0.00257143	0.000571429	0.00657143	0.00657143	0.00357143	0.00457143	0.000714286	0.00345328
02:20:09	27.5	0.114	0.137	0.134	0.141	0.141	0.138	0.139			-0.0205714	0.00242857	-0.000571429	0.00642857	0.00642857	0.00342857	0.00442857	0.000285714	0.00359516
02:25:09	27.5	0.115	0.138	0.135	0.141	0.142	0.14	0.142			-0.0204286	0.00257143	-0.000428571	0.00557143	0.00657143	0.00457143	0.00657143	0.000714286	0.00364776
02:30:09	27.5	0.115	0.138	0.135	0.143	0.143	0.141	0.142			-0.0214286	0.00157143	-0.00142857	0.00657143	0.00657143	0.00457143	0.00557143	0.000285714	0.00378414
02:35:09	27.5	0.115	0.139	0.137	0.143	0.144	0.142	0.143			-0.0225714	0.00142857	-0.000571429	0.00542857	0.00642857	0.00442857	0.00542857	-2.5773e-17	0.00387825
02:40:09	27.5	0.116	0.139	0.138	0.144	0.145	0.143	0.144			-0.0221429	0.000857143	-0.000142857	0.00585714	0.00685714	0.00485714	0.00585714	0.000285714	0.00387211
02:45:09	27.5	0.117	0.139	0.138	0.143	0.146	0.144	0.145			-0.0214286	0.000571429	-0.000428571	0.00457143	0.00757143	0.00557143	0.00657143	0.000428571	0.00381369
02:50:09	27.5	0.117	0.138	0.14	0.145	0.146	0.146	0.145			-0.0215714	-0.000571429	0.00142857	0.00642857	0.00742857	0.00742857	0.00642857	0.001	0.0039452
02:55:09	27.5	0.118	0.139	0.139	0.144	0.146	0.146	0.148			-0.0207143	0.000285714	0.000285714	0.00528571	0.00728571	0.00728571	0.00928571	0.00128571	0.0038975
03:00:09	27.5	0.118	0.14	0.139	0.145	0.146	0.147	0.146			-0.0204286	0.00157143	0.000571429	0.00657143	0.00757143	0.00857143	0.00757143	0.00171429	0.00387562
03:05:09	27.5	0.119	0.14	0.139	0.144	0.147	0.147	0.147			-0.0197143	0.00128571	0.000285714	0.00528571	0.00828571	0.00828571	0.00828571	0.00171429	0.00379133
03:10:09	27.5	0.12	0.14	0.141	0.148	0.148	0.147	0.147			-0.0184286	0.00157143	0.00257143	0.00957143	0.00957143	0.00857143	0.00857143	0.00314286	0.00381012
03:15:09	27.5	0.121	0.141	0.142	0.144	0.149	0.148	0.146			-0.0175714	0.00242857	0.00342857	0.00542857	0.0104286	0.00942857	0.00742857	0.003	0.00360461
03:20:09	27.6	0.122	0.141	0.142	0.148	0.149	0.148	0.147			-0.0161429	0.00285714	0.00385714	0.00985714	0.0108571	0.00985714	0.00885714	0.00428571	0.00360461
03:25:09	27.6	0.122	0.142	0.14	0.146	0.148	0.148	0.146			-0.0158571	0.00414286	0.00214286	0.00814286	0.0101429	0.0101429	0.00814286	0.00385714	0.00347586
03:30:09	27.6	0.123	0.142	0.139	0.145	0.148	0.15	0.147			-0.0144286	0.00457143	0.00157143	0.00757143	0.0105714	0.0125714	0.00957143	0.00457143	0.0034641
03:35:09	27.6	0.124	0.141	0.14	0.145	0.146	0.148	0.144			-0.0131429	0.00385714	0.00285714	0.00785714	0.00885714	0.0108571	0.00685714	0.004	0.00304278
03:40:09	27.6	0.125	0.141	0.139	0.146	0.146	0.149	0.145			-0.0121429	0.00385714	0.00185714	0.00885714	0.00885714	0.0118571	0.00785714	0.00442857	0.0030383
03:45:09	27.6	0.126	0.141	0.139	0.145	0.146	0.148	0.147			-0.0104286	0.00457143	0.00257143	0.00857143	0.00957143	0.0115714	0.0105714	0.00528571	0.00289264
03:50:09	27.6	0.127	0.141	0.138	0.147	0.147	0.148	0.144			-0.00871429	0.00528571	0.00228571	0.0112857	0.0112857	0.0122857	0.00828571	0.006	0.00280912
03:55:09	27.6	0.129	0.142	0.138	0.145	0.147	0.148	0.145			-0.00728571	0.00571429	0.00171429	0.00871429	0.0107143	0.0117143	0.00871429	0.00571429	0.00250713
04:00:09	27.6	0.13	0.143	0.137	0.145	0.148	0.148	0.145			-0.00614286	0.00685714	0.000857143	0.00885714	0.0118571	0.0118571	0.00885714	0.00614286	0.00248533
04:05:09	27.6	0.131	0.143	0.137	0.146	0.148	0.148	0.144			-0.00542857	0.00657143	0.000571429	0.00957143	0.0115714	0.0115714	0.00757143	0.006	0.00237905
04:10:09	27.6	0.132	0.143	0.14	0.147	0.147	0.149	0.146			-0.00385714	0.00714286	0.00414286	0.0111429	0.0111429	0.0131429	0.0101429	0.00757143	0.00221313
04:15:09	27.6	0.133	0.144	0.138	0.15	0.147	0.149	0.144			-0.00257143	0.00842857	0.00242857	0.0144286	0.0114286	0.0134286	0.00842857	0.008	0.00231822
04:20:09	27.6	0.134	0.143	0.137	0.154	0.147	0.15	0.145			-0.00114286	0.00785714	0.00185714	0.0188571	0.0118571	0.0148571	0.00985714	0.00914286	0.00265217
04:25:09	27.6	0.135	0.144	0.137	0.152	0.147	0.152	0.143			0.000285714	0.00928571	0.00228571	0.0172857	0.0122857	0.0172857	0.00828571	0.00957143	0.00252336
04:30:09	27.6	0.136	0.144	0.138	0.151	0.145	0.151	0.145			0.00157143	0.00957143	0.00357143	0.0165714	0.0105714	0.0165714	0.0105714	0.00985714	0.00217906
04:35:09	27.6	0.137	0.145	0.137	0.153	0.145	0.152	0.142			0.00271429	0.0107143	0.00271429	0.0187143	0.0107143	0.0177143	0.00771429	0.0101429	0.00242857
04:40:09	27.6	0.138	0.145	0.139	0.147	0.146	0.152	0.142			0.00485714	0.0118571	0.00585714	0.0138571	0.0128571	0.0188571	0.00885714	0.011	0.00184428
04:45:09	27.6	0.139	0.145	0.137	0.148	0.146	0.153	0.145			0.006	0.012	0.004	0.015	0.013	0.02	0.012	0.0117143	0.00203206
04:50:09	27.6	0.141	0.144	0.138	0.148	0.147	0.152	0.145			0.00785714	0.0108571	0.00485714	0.0148571	0.0138571	0.0188571	0.0118571	0.0118571	0.00174574
04:55:09	27.6	0.142	0.145	0.139	0.151	0.147	0.153	0.146			0.00885714	0.0118571	0.00585714	0.0178571	0.0138571	0.0198571	0.0128571	0.013	0.00183132
05:00:09	27.6	0.143	0.144	0.14	0.156	0.148	0.154	0.144			0.0101429	0.0111429	0.00714286	0.0231429	0.0151429	0.0211429	0.0111429	0.0141429	0.00225726
05:05:09	27.6	0.145	0.144	0.138	0.152	0.149	0.154	0.145			0.0124286	0.0114286	0.00542857	0.0194286	0.0164286	0.0214286	0.0124286	0.0141429	0.00204374
05:10:09	27.6	0.146	0.145	0.139	0.152	0.149	0.155	0.147			0.014	0.013	0.007	0.02	0.017	0.023	0.015	0.0155714	0.00195006
05:15:09	27.6	0.147	0.146	0.137	0.151	0.149	0.154	0.146			0.0154286	0.0144286	0.00542857	0.0194286	0.0174286	0.0224286	0.0144286	0.0155714	0.00201694
05:20:09	27.6	0.149	0.147	0.138	0.156	0.149	0.157	0.147			0.018	0.016	0.007	0.025	0.018	0.026	0.016	0.018	0.0024004
05:25:09	27.6	0.151	0.147	0.139	0.154	0.15	0.157	0.146			0.0202857	0.0162857	0.00828571	0.0232857	0.0192857	0.0262857	0.0152857	0.0184286	0.00221927
05:30:09	27.6	0.152	0.146	0.14	0.158	0.15	0.156	0.146			0.0224286	0.0164286	0.0104286	0.0284286	0.0204286	0.0264286	0.0164286	0.0201429	0.00236758
05:35:09	27.6	0.154	0.147	0.139	0.158	0.151	0.158	0.148			0.0245714	0.0175714	0.00957143	0.0285714	0.0215714	0.0285714	0.0185714	0.0212857	0.00256082
05:40:09	27.6	0.156	0.148	0.141	0.155	0.153	0.155	0.149			0.0267143	0.0187143	0.0117143	0.0257143	0.0237143	0.0257143	0.0197143	0.0217143	0.0020354
05:45:09	27.6	0.157	0.149	0.14	0.158	0.153	0.156	0.15			0.0281429	0.0201429	0.0111429	0.0291429	0.0241429	0.0271429	0.0211429	0.023	0.00236471
05:50:09	27.6	0.159	0.15	0.14	0.161	0.154	0.156	0.151			0.0302857	0.0212857	0.0112857	0.0322857	0.0252857	0.0272857	0.0222857	0.0242857	0.00263674
05:55:09	27.6	0.16	0.15	0.141	0.163	0.154	0.157	0.15			0.0321429	0.0221429	0.0131429	0.0351429	0.0261429	0.0291429	0.0221429	0.0257143	0.0027848
06:00:09	27.6	0.161	0.152	0.141	0.162	0.155	0.158	0.15			0.0334286	0.0244286	0.0134286	0.0344286	0.0274286	0.0304286	0.0224286	0.0265714	0.00275533
06:05:09	27.6	0.162	0.152	0.141	0.162	0.155	0.159	0.15			0.0348571	0.0248571	0.0138571	0.0348571	0.0278571	0.0318571	0.0228571	0.0272857	0.00285238
06:10:09	27.6	0.162	0.151	0.144	0.166	0.156	0.161	0.15			0.035	0.024	0.017	0.039	0.029	0.034	0.023	0.0287143	0.00294969
06:15:09	27.6	0.162	0.152	0.143	0.169	0.157	0.16	0.152			0.0355714	0.0255714	0.0165714	0.0425714	0.0305714	0.0335714	0.0255714	0.03	0.00316872
06:20:09	27.6	0.163	0.154	0.145	0.166	0.155	0.161	0.152			0.0364286	0.0274286	0.0184286	0.0394286	0.0284286	0.0344286	0.0254286	0.03	0.00273302
06:25:09	27.6	0.164	0.154	0.146	0.167	0.155	0.163	0.154			0.0378571	0.0278571	0.0198571	0.0408571	0.0288571	0.0368571	0.0278571	0.0314286	0.0027848
06:30:08	27.6	0.165	0.154	0.146	0.169	0.157	0.164	0.155			0.0391429	0.0281429	0.0201429	0.0431429	0.0311429	0.0381429	0.0291429	0.0327143	0.00298294
06:35:09	27.6	0.166	0.155	0.147	0.168	0.157	0.165	0.156			0.0405714	0.0295714	0.0215714	0.0425714	0.0315714	0.0395714	0.0305714	0.0337143	0.00284043
06:40:09	27.6	0.167	0.155	0.148	0.172	0.157	0.166	0.156			0.0427143	0.0307143	0.0237143	0.0477143	0.0327143	0.0417143	0.0317143	0.0358571	0.00317302
06:45:09	27.6	0.168	0.154	0.148	0.171	0.158	0.166	0.156			0.044	0.03	0.024	0.047	0.034	0.042	0.032	0.0361429	0.0031655
06:50:09	27.6	0.168	0.156	0.15	0.17	0.157	0.167	0.156			0.044	0.032	0.026	0.046	0.033	0.043	0.032	0.0365714	0.00289381
06:55:09	27.6	0.17	0.157	0.152	0.171	0.156	0.167	0.157			0.0465714	0.0335714	0.0285714	0.0475714	0.0325714	0.0435714	0.0335714	0.038	0.00290203
07:00:09	27.6	0.171	0.158	0.154	0.173	0.154	0.167	0.158			0.0475714	0.0345714	0.0305714	0.0495714	0.0305714	0.0435714	0.0345714	0.0387143	0.00303494
07:05:09	27.6	0.171	0.16	0.155	0.173	0.155	0.166	0.159			0.0475714	0.0365714	0.0315714	0.0495714	0.0315714	0.0425714	0.0355714	0.0392857	0.00278358
07:10:09	27.6	0.174	0.159	0.155	0.174	0.156	0.166	0.157			0.0507143	0.0357143	0.0317143	0.0507143	0.0327143	0.0427143	0.0337143	0.0397143	0.00314718
07:15:09	27.6	0.175	0.161	0.155	0.174	0.157	0.167	0.158			0.0518571	0.0378571	0.0318571	0.0508571	0.0338571	0.0438571	0.0348571	0.0407143	0.00310475
07:20:09	27.6	0.187	0.162	0.156	0.173	0.157	0.169	0.159			0.0631429	0.0381429	0.0321429	0.0491429	0.0331429	0.0451429	0.0351429	0.0422857	0.00421126
07:25:09	27.6	0.194	0.163	0.155	0.174	0.157	0.17	0.158			0.0704286	0.0394286	0.0314286	0.0504286	0.0334286	0.0464286	0.0344286	0.0437143	0.00518107
07:30:09	27.6	0.209	0.164	0.155	0.176	0.158	0.17	0.158			0.0855714	0.0405714	0.0315714	0.0525714	0.0345714	0.0465714	0.0345714	0.0465714	0.00708116
07:35:09	27.6	0.243	0.165	0.156	0.178	0.159	0.171	0.158			0.119714	0.0417143	0.0327143	0.0547143	0.0357143	0.0477143	0.0347143	0.0524286	0.0115999
07:40:09	27.6	0.258	0.166	0.157	0.18	0.158	0.171	0.157			0.134857	0.0428571	0.0338571	0.0568571	0.0348571	0.0478571	0.0338571	0.055	0.0136964
07:45:09	27.6	0.255	0.167	0.157	0.183	0.16	0.171	0.157			0.131857	0.0438571	0.0338571	0.0598571	0.0368571	0.0478571	0.0338571	0.0554286	0.0132087
07:50:09	27.6	0.283	0.167	0.158	0.186	0.162	0.172	0.159			0.16	0.044	0.035	0.063	0.039	0.049	0.036	0.0608571	0.0169192
07:55:09	27.6	0.27	0.166	0.16	0.192	0.165	0.174	0.159			0.147286	0.0432857	0.0372857	0.0692857	0.0422857	0.0512857	0.0362857	0.061	0.0149964
08:00:09	27.6	0.297	0.168	0.161	0.202	0.17	0.173	0.16			0.174714	0.0457143	0.0387143	0.0797143	0.0477143	0.0507143	0.0377143	0.0678571	0.018585
08:05:09	27.6	0.305	0.17	0.162	0.225	0.184	0.177	0.161			0.182714	0.0477143	0.0397143	0.102714	0.0617143	0.0547143	0.0387143	0.0754286	0.019678
08:10:09	27.6	0.295	0.172	0.163	0.234	0.195	0.182	0.161			0.172857	0.0498571	0.0408571	0.111857	0.0728571	0.0598571	0.0388571	0.0781429	0.0183896
08:15:09	27.6	0.365	0.173	0.164	0.243	0.231	0.192	0.161			0.243571	0.0515714	0.0425714	0.121571	0.109571	0.0705714	0.0395714	0.097	0.027285
08:20:09	27.6	0.334	0.174	0.165	0.259	0.249	0.202	0.162			0.213571	0.0535714	0.0445714	0.138571	0.128571	0.0815714	0.0415714	0.100286	0.0239957
08:25:09	27.6	0.323	0.173	0.167	0.277	0.26	0.221	0.165			0.202714	0.0527143	0.0467143	0.156714	0.139714	0.100714	0.0447143	0.106286	0.0235026
08:30:09	27.6	0.363	0.173	0.173	0.296	0.256	0.242	0.169			0.243	0.053	0.053	0.176	0.136	0.122	0.049	0.118857	0.0278323
08:35:09	27.6	0.342	0.174	0.184	0.319	0.294	0.249	0.175			0.222	0.054	0.064	0.199	0.174	0.129	0.055	0.128143	0.0271218
08:40:09	27.7	0.325	0.177	0.202	0.327	0.303	0.266	0.186			0.204714	0.0567143	0.0817143	0.206714	0.182714	0.145714	0.0657143	0.134857	0.0249585
08:45:09	27.7	0.34	0.18	0.245	0.33	0.347	0.282	0.202			0.219571	0.0595714	0.124571	0.209571	0.226571	0.161571	0.0815714	0.154714	0.0256983
08:50:09	27.7	0.332	0.18	0.252	0.34	0.323	0.293	0.238			0.211571	0.0595714	0.131571	0.219571	0.202571	0.172571	0.117571	0.159286	0.0222911
08:55:09	27.7	0.352	0.185	0.237	0.341	0.327	0.299	0.258			0.232	0.065	0.117	0.221	0.207	0.179	0.138	0.165571	0.0232049
09:00:09	27.7	0.336	0.193	0.24	0.34	0.326	0.294	0.26			0.216	0.073	0.12	0.22	0.206	0.174	0.14	0.164143	0.0209857
09:05:09	27.7	0.372	0.203	0.23	0.344	0.332	0.298	0.262			0.252	0.083	0.11	0.224	0.212	0.178	0.142	0.171571	0.0236057
09:10:09	27.7	0.373	0.235	0.256	0.346	0.332	0.307	0.278			0.253	0.115	0.136	0.226	0.212	0.187	0.158	0.183857	0.0189353
09:15:09	27.7	0.354	0.24	0.264	0.353	0.335	0.321	0.31			0.234286	0.120286	0.144286	0.233286	0.215286	0.201286	0.190286	0.191286	0.0165759
09:20:09	27.7	0.359	0.241	0.316	0.35	0.331	0.324	0.332			0.239	0.121	0.196	0.23	0.211	0.204	0.212	0.201857	0.0145854
09:25:09	27.7	0.387	0.268	0.306	0.356	0.337	0.333	0.327			0.267286	0.148286	0.186286	0.236286	0.217286	0.213286	0.207286	0.210857	0.0141503
09:30:09	27.7	0.373	0.263	0.3	0.351	0.33	0.332	0.328			0.253	0.143	0.18	0.231	0.21	0.212	0.208	0.205286	0.013391
09:35:09	27.7	0.346	0.283	0.302	0.353	0.332	0.335	0.33			0.226143	0.163143	0.182143	0.233143	0.212143	0.215143	0.210143	0.206	0.00936922
09:40:09	27.7	0.335	0.281	0.311	0.365	0.332	0.34	0.338			0.214857	0.160857	0.190857	0.244857	0.211857	0.219857	0.217857	0.208714	0.00996525
09:45:09	27.7	0.337	0.289	0.31	0.375	0.335	0.344	0.34			0.217714	0.169714	0.190714	0.255714	0.215714	0.224714	0.220714	0.213571	0.0102572
09:50:09	27.7	0.335	0.351	0.311	0.37	0.336	0.34	0.334			0.215571	0.231571	0.191571	0.250571	0.216571	0.220571	0.214571	0.220143	0.00679235
09:55:09	27.7	0.333	0.33	0.316	0.386	0.338	0.341	0.334			0.214143	0.211143	0.197143	0.267143	0.219143	0.222143	0.215143	0.220857	0.00828284
10:00:09	27.7	0.33	0.346	0.321	0.38	0.346	0.341	0.336			0.211143	0.227143	0.202143	0.261143	0.227143	0.222143	0.217143	0.224	0.00705903
10:05:09	27.7	0.334	0.329	0.325	0.394	0.356	0.348	0.34			0.214714	0.209714	0.205714	0.274714	0.236714	0.228714	0.220714	0.227286	0.00888513
10:10:09	27.7	0.336	0.346	0.33	0.388	0.36	0.352	0.338			0.217429	0.227429	0.211429	0.269429	0.241429	0.233429	0.219429	0.231429	0.00740656
10:15:09	27.7	0.338	0.33	0.332	0.385	0.368	0.354	0.336			0.219429	0.211429	0.213429	0.266429	0.249429	0.235429	0.217429	0.230429	0.00790118
10:20:09	27.7	0.342	0.34	0.33	0.382	0.367	0.343	0.331			0.223429	0.221429	0.211429	0.263429	0.248429	0.224429	0.212429	0.229286	0.00732715
10:25:09	27.7	0.342	0.328	0.331	0.379	0.367	0.344	0.33			0.223286	0.209286	0.212286	0.260286	0.248286	0.225286	0.211286	0.227143	0.00748786
10:30:09	27.7	0.341	0.349	0.337	0.367	0.359	0.347	0.333			0.222	0.23	0.218	0.248	0.24	0.228	0.214	0.228571	0.00457143
10:35:09	27.7	0.341	0.339	0.338	0.353	0.373	0.355	0.335			0.222571	0.220571	0.219571	0.234571	0.254571	0.236571	0.216571	0.229286	0.00511168
10:40:09	27.7	0.343	0.337	0.339	0.346	0.371	0.38	0.336			0.224571	0.218571	0.220571	0.227571	0.252571	0.261571	0.217571	0.231857	0.00671074
10:45:09	27.7	0.344	0.344	0.341	0.341	0.364	0.396	0.333			0.225429	0.225429	0.222429	0.222429	0.245429	0.277429	0.214429	0.233286	0.00818078
10:50:09	27.7	0.346	0.355	0.345	0.334	0.351	0.384	0.336			0.227286	0.236286	0.226286	0.215286	0.232286	0.265286	0.217286	0.231429	0.00631487
10:55:09	27.7	0.35	0.361	0.35	0.33	0.347	0.365	0.337			0.231143	0.242143	0.231143	0.211143	0.228143	0.246143	0.218143	0.229714	0.00465402
11:00:09	27.7	0.349	0.369	0.356	0.329	0.344	0.355	0.35			0.230286	0.250286	0.237286	0.210286	0.225286	0.236286	0.231286	0.231571	0.00462763
11:05:09	27.7	0.348	0.36	0.35	0.328	0.341	0.344	0.343			0.229429	0.241429	0.231429	0.209429	0.222429	0.225429	0.224429	0.226286	0.00368025
11:10:09	27.7	0.35	0.362	0.353	0.326	0.335	0.337	0.345			0.231571	0.243571	0.234571	0.207571	0.216571	0.218571	0.226571	0.225571	0.0046188
11:15:09	27.7	0.351	0.359	0.351	0.328	0.331	0.328	0.343			0.233143	0.241143	0.233143	0.210143	0.213143	0.210143	0.225143	0.223714	0.00479015
11:20:09	27.7	0.351	0.36	0.352	0.326	0.329	0.321	0.333			0.233143	0.242143	0.234143	0.208143	0.211143	0.203143	0.215143	0.221	0.00573805
11:25:09	27.7	0.35	0.363	0.349	0.323	0.323	0.316	0.326			0.232571	0.245571	0.231571	0.205571	0.205571	0.198571	0.208571	0.218286	0.00678133
11:30:09	27.7	0.353	0.364	0.345	0.321	0.322	0.314	0.319			0.235286	0.246286	0.227286	0.203286	0.204286	0.196286	0.201286	0.216286	0.00743223
11:35:09	27.7	0.357	0.36	0.344	0.321	0.321	0.313	0.315			0.239286	0.242286	0.226286	0.203286	0.203286	0.195286	0.197286	0.215286	0.0076189
11:40:09	27.7	0.355	0.357	0.34	0.323	0.321	0.311	0.311			0.237714	0.239714	0.222714	0.205714	0.203714	0.193714	0.193714	0.213857	0.00739507
11:45:09	27.7	0.355	0.35	0.333	0.322	0.321	0.311	0.308			0.237571	0.232571	0.215571	0.204571	0.203571	0.193571	0.190571	0.211143	0.00691739
11:50:09	27.7	0.356	0.344	0.332	0.322	0.323	0.313	0.305			0.238429	0.226429	0.214429	0.204429	0.205429	0.195429	0.187429	0.210286	0.00667415
11:55:09	27.7	0.361	0.34	0.331	0.321	0.322	0.313	0.304			0.244143	0.223143	0.214143	0.204143	0.205143	0.196143	0.187143	0.210571	0.00711423
12:00:09	27.7	0.359	0.335	0.326	0.323	0.324	0.313	0.3			0.242	0.218	0.209	0.206	0.207	0.196	0.183	0.208714	0.00694781
12:05:09	27.7	0.361	0.331	0.325	0.321	0.321	0.314	0.3			0.244286	0.214286	0.208286	0.204286	0.204286	0.197286	0.183286	0.208	0.00708692
12:10:09	27.7	0.36	0.332	0.324	0.322	0.322	0.316	0.301			0.243286	0.215286	0.207286	0.205286	0.205286	0.199286	0.184286	0.208571	0.00681285
12:15:09	27.7	0.362	0.336	0.324	0.324	0.322	0.319	0.303			0.245286	0.219286	0.207286	0.207286	0.205286	0.202286	0.186286	0.210429	0.00688141
12:20:09	27.7	0.358	0.336	0.323	0.324	0.32	0.317	0.303			0.241143	0.219143	0.206143	0.207143	0.203143	0.200143	0.186143	0.209	0.00651529
12:25:09	27.7	0.36	0.337	0.323	0.325	0.319	0.317	0.302			0.242857	0.219857	0.205857	0.207857	0.201857	0.199857	0.184857	0.209	0.00688832
12:30:09	27.7	0.356	0.336	0.321	0.323	0.317	0.315	0.302			0.239	0.219	0.204	0.206	0.2	0.198	0.185	0.207286	0.00653093
12:35:09	27.7	0.356	0.334	0.322	0.322	0.316	0.316	0.303			0.238714	0.216714	0.204714	0.204714	0.198714	0.198714	0.185714	0.206857	0.00636369
12:40:09	27.7	0.359	0.337	0.324	0.321	0.317	0.316	0.304			0.241857	0.219857	0.206857	0.203857	0.199857	0.198857	0.186857	0.208286	0.00672896
12:45:09	27.7	0.361	0.337	0.322	0.323	0.318	0.316	0.305			0.243571	0.219571	0.204571	0.205571	0.200571	0.198571	0.187571	0.208571	0.00685913
12:50:09	27.7	0.36	0.336	0.323	0.324	0.318	0.317	0.306			0.242571	0.218571	0.205571	0.206571	0.200571	0.199571	0.188571	0.208857	0.00657091
12:55:09	27.7	0.357	0.334	0.32	0.323	0.318	0.319	0.308			0.239857	0.216857	0.202857	0.205857	0.200857	0.201857	0.190857	0.208429	0.00598752
13:00:09	27.7	0.36	0.333	0.319	0.324	0.319	0.319	0.309			0.242571	0.215571	0.201571	0.206571	0.201571	0.201571	0.191571	0.208714	0.00625806
13:05:09	27.7	0.359	0.331	0.314	0.325	0.317	0.321	0.31			0.241571	0.213571	0.196571	0.207571	0.199571	0.203571	0.192571	0.207857	0.00620566
13:10:09	27.7	0.359	0.335	0.32	0.325	0.319	0.321	0.311			0.241571	0.217571	0.202571	0.207571	0.201571	0.203571	0.193571	0.209714	0.00596988
13:15:09	27.7	0.361	0.335	0.319	0.326	0.319	0.323	0.313			0.243571	0.217571	0.201571	0.208571	0.201571	0.205571	0.195571	0.210571	0.00608276
13:20:09	27.7	0.361	0.336	0.319	0.327	0.319	0.324	0.314			0.243	0.218	0.201	0.209	0.201	0.206	0.196	0.210571	0.00602715
13:25:09	27.7	0.359	0.333	0.316	0.326	0.319	0.322	0.312			0.241286	0.215286	0.198286	0.208286	0.201286	0.204286	0.194286	0.209	0.00596703
13:30:09	27.7	0.361	0.332	0.316	0.326	0.319	0.32	0.312			0.243429	0.214429	0.198429	0.208429	0.201429	0.202429	0.194429	0.209	0.00624827
13:35:09	27.7	0.36	0.334	0.318	0.327	0.319	0.321	0.313			0.242286	0.216286	0.200286	0.209286	0.201286	0.203286	0.195286	0.209714	0.0060034
13:40:09	27.7	0.356	0.332	0.316	0.328	0.318	0.32	0.312			0.238143	0.214143	0.198143	0.210143	0.200143	0.202143	0.194143	0.208143	0.00563999
13:45:09	27.7	0.36	0.334	0.314	0.327	0.318	0.32	0.311			0.241714	0.215714	0.195714	0.208714	0.199714	0.201714	0.192714	0.208	0.00634228
13:50:09	27.7	0.364	0.342	0.32	0.331	0.322	0.322	0.313			0.245857	0.223857	0.201857	0.212857	0.203857	0.203857	0.194857	0.212429	0.00657505
13:55:09	27.7	0.361	0.34	0.317	0.329	0.322	0.323	0.314			0.242857	0.221857	0.198857	0.210857	0.203857	0.204857	0.195857	0.211286	0.00616772
14:00:09	27.7	0.361	0.335	0.313	0.329	0.322	0.321	0.313			0.242571	0.216571	0.194571	0.210571	0.203571	0.202571	0.194571	0.209286	0.00631217
14:05:09	27.7	0.364	0.335	0.314	0.331	0.323	0.324	0.314			0.245571	0.216571	0.195571	0.212571	0.204571	0.205571	0.195571	0.210857	0.0065017
14:10:09	27.7	0.362	0.335	0.314	0.33	0.322	0.321	0.313			0.243286	0.216286	0.195286	0.211286	0.203286	0.202286	0.194286	0.209429	0.00638983
14:15:09	27.7	0.365	0.334	0.316	0.334	0.325	0.323	0.315			0.246143	0.215143	0.197143	0.215143	0.206143	0.204143	0.196143	0.211429	0.00645761
14:20:09	27.7	0.364	0.34	0.318	0.336	0.327	0.326	0.317			0.245	0.221	0.199	0.217	0.208	0.207	0.198	0.213571	0.00614064
14:25:09	27.7	0.363	0.343	0.319	0.339	0.328	0.325	0.316			0.243857	0.223857	0.199857	0.219857	0.208857	0.205857	0.196857	0.214143	0.00619029
14:30:09	27.7	0.364	0.344	0.319	0.34	0.329	0.327	0.318			0.244714	0.224714	0.199714	0.220714	0.209714	0.207714	0.198714	0.215143	0.00615226
14:35:09	27.7	0.366	0.344	0.321	0.343	0.33	0.329	0.32			0.247143	0.225143	0.202143	0.224143	0.211143	0.210143	0.201143	0.217286	0.00613122
14:40:09	27.7	0.365	0.344	0.324	0.346	0.333	0.33	0.321			0.245857	0.224857	0.204857	0.226857	0.213857	0.210857	0.201857	0.218429	0.00577704
14:45:09	27.7	0.364	0.348	0.326	0.348	0.334	0.331	0.32			0.244714	0.228714	0.206714	0.228714	0.214714	0.211714	0.200714	0.219429	0.00578469
14:50:09	27.7	0.363	0.349	0.326	0.348	0.334	0.331	0.321			0.243571	0.229571	0.206571	0.228571	0.214571	0.211571	0.201571	0.219429	0.00564602
14:55:09	27.7	0.364	0.345	0.323	0.347	0.334	0.332	0.321			0.244286	0.225286	0.203286	0.227286	0.214286	0.212286	0.201286	0.218286	0.00571548
15:00:09	27.7	0.364	0.348	0.326	0.346	0.335	0.334	0.321			0.244143	0.228143	0.206143	0.226143	0.215143	0.214143	0.201143	0.219286	0.00553959
15:05:09	27.7	0.365	0.35	0.328	0.347	0.337	0.337	0.323			0.244857	0.229857	0.207857	0.226857	0.216857	0.216857	0.202857	0.220857	0.00538516
15:10:09	27.7	0.366	0.353	0.328	0.351	0.34	0.337	0.323			0.245714	0.232714	0.207714	0.230714	0.219714	0.216714	0.202714	0.222286	0.00569401
15:15:09	27.7	0.366	0.357	0.33	0.35	0.34	0.337	0.323			0.245429	0.236429	0.209429	0.229429	0.219429	0.216429	0.202429	0.222714	0.00574752
15:20:09	27.7	0.367	0.357	0.329	0.348	0.34	0.337	0.323			0.246429	0.236429	0.208429	0.227429	0.219429	0.216429	0.202429	0.222429	0.00585133
15:25:09	27.7	0.367	0.355	0.33	0.35	0.339	0.336	0.323			0.246143	0.234143	0.209143	0.229143	0.218143	0.215143	0.202143	0.222	0.00577939
15:30:09	27.7	0.366	0.351	0.327	0.344	0.339	0.335	0.323			0.244857	0.229857	0.205857	0.222857	0.217857	0.213857	0.201857	0.219571	0.00554941
15:35:09	27.7	0.367	0.356	0.329	0.342	0.339	0.333	0.325			0.246286	0.235286	0.208286	0.221286	0.218286	0.212286	0.204286	0.220857	0.00570654
15:40:09	27.7	0.366	0.359	0.332	0.356	0.341	0.332	0.325			0.245143	0.238143	0.211143	0.235143	0.220143	0.211143	0.204143	0.223571	0.00599546
15:45:09	27.7	0.367	0.352	0.33	0.351	0.336	0.331	0.325			0.246714	0.231714	0.209714	0.230714	0.215714	0.210714	0.204714	0.221429	0.00576407
15:50:09	27.7	0.368	0.348	0.33	0.352	0.335	0.332	0.326			0.247857	0.227857	0.209857	0.231857	0.214857	0.211857	0.205857	0.221429	0.00568983
15:55:09	27.7	0.368	0.346	0.334	0.347	0.34	0.335	0.328			0.247429	0.225429	0.213429	0.226429	0.219429	0.214429	0.207429	0.222	0.00494665
16:00:09	27.7	0.366	0.351	0.336	0.351	0.34	0.338	0.33			0.245714	0.230714	0.215714	0.230714	0.219714	0.217714	0.209714	0.224286	0.00460774
16:05:09	27.7	0.368	0.355	0.337	0.358	0.342	0.34	0.332			0.248	0.235	0.217	0.238	0.222	0.22	0.212	0.227429	0.00493702
16:10:09	27.7	0.369	0.353	0.336	0.354	0.34	0.344	0.333			0.248571	0.232571	0.215571	0.233571	0.219571	0.223571	0.212571	0.226571	0.00474091
16:15:09	27.7	0.37	0.352	0.339	0.358	0.346	0.346	0.335			0.249857	0.231857	0.218857	0.237857	0.225857	0.225857	0.214857	0.229286	0.00448201
16:20:09	27.7	0.367	0.357	0.342	0.361	0.347	0.344	0.334			0.246714	0.236714	0.221714	0.240714	0.226714	0.223714	0.213714	0.23	0.0044278
16:25:09	27.7	0.367	0.352	0.336	0.355	0.343	0.342	0.334			0.246429	0.231429	0.215429	0.234429	0.222429	0.221429	0.213429	0.226429	0.00441858
16:30:09	27.7	0.369	0.35	0.339	0.357	0.346	0.345	0.336			0.248429	0.229429	0.218429	0.236429	0.225429	0.224429	0.215429	0.228286	0.00425065
16:35:09	27.7	0.37	0.347	0.34	0.358	0.344	0.343	0.335			0.249	0.226	0.219	0.237	0.223	0.222	0.214	0.227143	0.00452205
16:40:09	27.7	0.371	0.348	0.342	0.355	0.346	0.346	0.335			0.250571	0.227571	0.221571	0.234571	0.225571	0.225571	0.214571	0.228571	0.00432049
16:45:09	27.7	0.372	0.353	0.348	0.366	0.347	0.351	0.334			0.251286	0.232286	0.227286	0.245286	0.226286	0.230286	0.213286	0.232286	0.00477094
16:50:09	27.7	0.371	0.358	0.346	0.372	0.354	0.353	0.334			0.250429	0.237429	0.225429	0.251429	0.233429	0.232429	0.213429	0.234857	0.00507025
16:55:09	27.7	0.37	0.354	0.34	0.363	0.348	0.347	0.331			0.249429	0.233429	0.219429	0.242429	0.227429	0.226429	0.210429	0.229857	0.00501833
17:00:09	27.6	0.371	0.35	0.339	0.355	0.347	0.348	0.331			0.250429	0.229429	0.218429	0.234429	0.226429	0.227429	0.210429	0.228143	0.00475452
17:05:09	27.6	0.374	0.353	0.344	0.366	0.351	0.351	0.332			0.253143	0.232143	0.223143	0.245143	0.230143	0.230143	0.211143	0.232143	0.00520988
17:10:09	27.6	0.375	0.36	0.35	0.372	0.355	0.356	0.337			0.254429	0.239429	0.229429	0.251429	0.234429	0.235429	0.216429	0.237286	0.0048962
17:15:09	27.7	0.374	0.36	0.345	0.365	0.353	0.353	0.334			0.253714	0.239714	0.224714	0.244714	0.232714	0.232714	0.213714	0.234571	0.00496381
17:20:09	27.6	0.374	0.358	0.346	0.366	0.352	0.351	0.335			0.253714	0.237714	0.225714	0.245714	0.231714	0.230714	0.214714	0.234286	0.00486903
17:25:09	27.6	0.376	0.357	0.343	0.362	0.354	0.354	0.336			0.255286	0.236286	0.222286	0.241286	0.233286	0.233286	0.215286	0.233857	0.0048788
17:30:09	27.7	0.376	0.358	0.343	0.368	0.356	0.354	0.336			0.255143	0.237143	0.222143	0.247143	0.235143	0.233143	0.215143	0.235	0.00516595
17:35:09	27.6	0.376	0.362	0.347	0.374	0.361	0.358	0.34			0.254714	0.240714	0.225714	0.252714	0.239714	0.236714	0.218714	0.238429	0.00495078
17:40:09	27.6	0.377	0.362	0.347	0.372	0.359	0.356	0.339			0.255429	0.240429	0.225429	0.250429	0.237429	0.234429	0.217429	0.237286	0.00501155
17:45:09	27.7	0.377	0.36	0.347	0.37	0.358	0.357	0.34			0.255429	0.238429	0.225429	0.248429	0.236429	0.235429	0.218429	0.236857	0.00476524
17:50:09	27.7	0.378	0.364	0.35	0.371	0.361	0.362	0.344			0.255857	0.241857	0.227857	0.248857	0.238857	0.239857	0.221857	0.239286	0.00438535
17:55:09	27.6	0.377	0.362	0.348	0.373	0.36	0.36	0.343			0.255	0.24	0.226	0.251	0.238	0.238	0.221	0.238429	0.00461291
18:00:09	27.7	0.377	0.36	0.349	0.371	0.358	0.359	0.343			0.254714	0.237714	0.226714	0.248714	0.235714	0.236714	0.220714	0.237286	0.00442857
18:05:09	27.6	0.378	0.357	0.348	0.37	0.356	0.358	0.342			0.256429	0.235429	0.226429	0.248429	0.234429	0.236429	0.220429	0.236857	0.00463864
18:10:09	27.6	0.378	0.359	0.351	0.373	0.362	0.364	0.346			0.256571	0.237571	0.229571	0.251571	0.240571	0.242571	0.224571	0.240429	0.004273
18:15:09	27.6	0.376	0.356	0.347	0.374	0.359	0.357	0.343			0.254571	0.234571	0.225571	0.252571	0.237571	0.235571	0.221571	0.237429	0.00469766
18:20:09	27.6	0.376	0.355	0.349	0.373	0.361	0.358	0.343			0.254143	0.233143	0.227143	0.251143	0.239143	0.236143	0.221143	0.237429	0.00452882
18:25:09	27.6	0.379	0.356	0.345	0.369	0.354	0.353	0.341			0.257286	0.234286	0.223286	0.247286	0.232286	0.231286	0.219286	0.235	0.00500816
18:30:09	27.6	0.381	0.357	0.344	0.367	0.357	0.356	0.342			0.259	0.235	0.222	0.245	0.235	0.234	0.22	0.235714	0.00504133
18:35:09	27.6	0.38	0.36	0.351	0.374	0.363	0.36	0.346			0.258143	0.238143	0.229143	0.252143	0.241143	0.238143	0.224143	0.240143	0.00450925
18:40:09	27.7	0.379	0.363	0.358	0.383	0.368	0.365	0.349			0.257286	0.241286	0.236286	0.261286	0.246286	0.243286	0.227286	0.244714	0.00442857
18:45:09	27.7	0.378	0.364	0.357	0.38	0.369	0.368	0.35			0.256143	0.242143	0.235143	0.258143	0.247143	0.246143	0.228143	0.244714	0.00405825
18:50:09	27.6	0.376	0.365	0.355	0.382	0.369	0.368	0.35			0.253857	0.242857	0.232857	0.259857	0.246857	0.245857	0.227857	0.244286	0.00421368
18:55:09	27.7	0.376	0.363	0.353	0.379	0.367	0.367	0.347			0.254714	0.241714	0.231714	0.257714	0.245714	0.245714	0.225714	0.243286	0.00435265
19:00:09	27.6	0.377	0.36	0.35	0.377	0.364	0.361	0.345			0.255714	0.238714	0.228714	0.255714	0.242714	0.239714	0.223714	0.240714	0.00460848
19:05:09	27.6	0.379	0.36	0.351	0.374	0.365	0.362	0.346			0.257429	0.238429	0.229429	0.252429	0.243429	0.240429	0.224429	0.240857	0.00442319
19:10:09	27.6	0.377	0.365	0.356	0.38	0.368	0.368	0.351			0.255429	0.243429	0.234429	0.258429	0.246429	0.246429	0.229429	0.244857	0.00393311
19:15:09	27.6	0.376	0.365	0.35	0.382	0.367	0.367	0.35			0.254429	0.243429	0.228429	0.260429	0.245429	0.245429	0.228429	0.243714	0.00454456
19:20:09	27.6	0.376	0.362	0.348	0.375	0.363	0.366	0.349			0.254	0.24	0.226	0.253	0.241	0.244	0.227	0.240714	0.00420722
19:25:09	27.6	0.375	0.363	0.348	0.38	0.366	0.368	0.351			0.253286	0.241286	0.226286	0.258286	0.244286	0.246286	0.229286	0.242714	0.00442319
19:30:09	27.6	0.375	0.367	0.355	0.385	0.369	0.371	0.353			0.253143	0.245143	0.233143	0.263143	0.247143	0.249143	0.231143	0.246	0.0042056
19:35:09	27.6	0.375	0.365	0.35	0.382	0.366	0.367	0.348			0.252857	0.242857	0.227857	0.259857	0.243857	0.244857	0.225857	0.242571	0.00464817
19:40:09	27.6	0.374	0.363	0.349	0.381	0.367	0.367	0.348			0.251429	0.240429	0.226429	0.258429	0.244429	0.244429	0.225429	0.241571	0.00460035
19:45:09	27.6	0.373	0.368	0.354	0.386	0.369	0.372	0.351			0.250571	0.245571	0.231571	0.263571	0.246571	0.249571	0.228571	0.245143	0.00449792
19:50:09	27.6	0.374	0.372	0.361	0.396	0.378	0.376	0.357			0.251286	0.249286	0.238286	0.273286	0.255286	0.253286	0.234286	0.250714	0.00479015
19:55:09	27.6	0.375	0.371	0.357	0.39	0.374	0.371	0.353			0.252	0.248	0.234	0.267	0.251	0.248	0.23	0.247143	0.0046313
20:00:09	27.7	0.376	0.367	0.352	0.382	0.369	0.367	0.351			0.253	0.244	0.229	0.259	0.246	0.244	0.228	0.243286	0.00432993
20:05:09	27.6	0.377	0.366	0.349	0.381	0.368	0.365	0.35			0.253571	0.242571	0.225571	0.257571	0.244571	0.241571	0.226571	0.241714	0.00460553
20:10:09	27.6	0.377	0.367	0.351	0.382	0.367	0.366	0.349			0.253857	0.243857	0.227857	0.258857	0.243857	0.242857	0.225857	0.242429	0.00460774
20:15:09	27.6	0.376	0.37	0.354	0.385	0.369	0.371	0.352			0.252857	0.246857	0.230857	0.261857	0.245857	0.247857	0.228857	0.245	0.0044155
20:20:09	27.6	0.377	0.372	0.357	0.39	0.37	0.373	0.355			0.253714	0.248714	0.233714	0.266714	0.246714	0.249714	0.231714	0.247286	0.0045085
20:25:09	27.6	0.378	0.374	0.356	0.387	0.369	0.373	0.354			0.254714	0.250714	0.232714	0.263714	0.245714	0.249714	0.230714	0.246857	0.00444773
20:30:09	27.6	0.38	0.371	0.351	0.382	0.364	0.368	0.351			0.256286	0.247286	0.227286	0.258286	0.240286	0.244286	0.227286	0.243	0.00470923
20:35:09	27.6	0.38	0.37	0.351	0.383	0.366	0.366	0.35			0.256286	0.246286	0.227286	0.259286	0.242286	0.242286	0.226286	0.242857	0.00482975
20:40:09	27.7	0.381	0.374	0.359	0.391	0.371	0.372	0.354			0.257	0.25	0.235	0.267	0.247	0.248	0.23	0.247714	0.00472941
20:45:09	27.6	0.383	0.375	0.359	0.392	0.37	0.372	0.354			0.259143	0.251143	0.235143	0.268143	0.246143	0.248143	0.230143	0.248286	0.00494459
20:50:09	27.6	0.383	0.379	0.36	0.386	0.37	0.378	0.359			0.259143	0.255143	0.236143	0.262143	0.246143	0.254143	0.235143	0.249714	0.00408748
20:55:09	27.6	0.382	0.377	0.362	0.388	0.373	0.377	0.358			0.258	0.253	0.238	0.264	0.249	0.253	0.234	0.249857	0.00402036
21:00:09	27.6	0.381	0.375	0.357	0.385	0.368	0.376	0.357			0.256714	0.250714	0.232714	0.260714	0.243714	0.251714	0.232714	0.247	0.00419021
21:05:09	27.6	0.379	0.375	0.356	0.38	0.367	0.375	0.355			0.255143	0.251143	0.232143	0.256143	0.243143	0.251143	0.231143	0.245714	0.00396327
21:10:09	27.6	0.376	0.376	0.36	0.384	0.37	0.378	0.357			0.252	0.252	0.236	0.26	0.246	0.254	0.233	0.247571	0.003728
21:15:09	27.6	0.377	0.378	0.361	0.388	0.372	0.379	0.359			0.252857	0.253857	0.236857	0.263857	0.247857	0.254857	0.234857	0.249286	0.00390882
21:20:09	27.6	0.378	0.377	0.355	0.381	0.367	0.374	0.354			0.254143	0.253143	0.231143	0.257143	0.243143	0.250143	0.230143	0.245571	0.00419102
21:25:09	27.6	0.381	0.379	0.358	0.385	0.372	0.376	0.356			0.256857	0.254857	0.233857	0.260857	0.247857	0.251857	0.231857	0.248286	0.00426981
21:30:09	27.6	0.382	0.382	0.362	0.386	0.373	0.378	0.357			0.257714	0.257714	0.237714	0.261714	0.248714	0.253714	0.232714	0.25	0.0041445
21:35:09	27.6	0.383	0.383	0.362	0.388	0.374	0.38	0.361			0.259143	0.259143	0.238143	0.264143	0.250143	0.256143	0.237143	0.252	0.00403218
21:40:09	27.6	0.381	0.384	0.363	0.387	0.373	0.381	0.362			0.258	0.261	0.24	0.264	0.25	0.258	0.239	0.252857	0.00380744
21:45:09	27.6	0.381	0.382	0.361	0.383	0.369	0.378	0.359			0.258	0.259	0.238	0.26	0.246	0.255	0.236	0.250286	0.00385891
21:50:09	27.6	0.382	0.382	0.36	0.386	0.373	0.38	0.362			0.258714	0.258714	0.236714	0.262714	0.249714	0.256714	0.238714	0.251714	0.00390969
21:55:09	27.6	0.382	0.382	0.358	0.386	0.37	0.378	0.36			0.258429	0.258429	0.234429	0.262429	0.246429	0.254429	0.236429	0.250143	0.00424104
22:00:09	27.6	0.381	0.386	0.362	0.39	0.373	0.382	0.363			0.257571	0.262571	0.238571	0.266571	0.249571	0.258571	0.239571	0.253286	0.0041617
22:05:09	27.6	0.381	0.386	0.36	0.393	0.376	0.382	0.365			0.257429	0.262429	0.236429	0.269429	0.252429	0.258429	0.241429	0.254	0.00439078
22:10:09	27.6	0.382	0.387	0.359	0.389	0.372	0.381	0.364			0.258143	0.263143	0.235143	0.265143	0.248143	0.257143	0.240143	0.252429	0.0043628
22:15:09	27.6	0.383	0.387	0.356	0.388	0.373	0.379	0.363			0.259286	0.263286	0.232286	0.264286	0.249286	0.255286	0.239286	0.251857	0.00462837
22:20:09	27.6	0.381	0.387	0.356	0.388	0.373	0.381	0.364			0.257	0.263	0.232	0.264	0.249	0.257	0.24	0.251714	0.00454456
22:25:09	27.6	0.381	0.389	0.357	0.387	0.373	0.381	0.364			0.257	0.265	0.233	0.263	0.249	0.257	0.24	0.252	0.00450925
22:30:09	27.6	0.378	0.388	0.359	0.389	0.372	0.381	0.361			0.254429	0.264429	0.235429	0.265429	0.248429	0.257429	0.237429	0.251857	0.00455055
22:35:09	27.6	0.379	0.388	0.357	0.389	0.372	0.379	0.359			0.255	0.264	0.233	0.265	0.248	0.255	0.235	0.250714	0.00484382
22:40:09	27.6	0.379	0.39	0.359	0.389	0.375	0.384	0.363			0.254714	0.265714	0.234714	0.264714	0.250714	0.259714	0.238714	0.252714	0.00460331
22:45:09	27.6	0.377	0.39	0.361	0.393	0.375	0.39	0.371			0.253143	0.266143	0.237143	0.269143	0.251143	0.266143	0.247143	0.255714	0.00448201
22:50:09	27.6	0.378	0.391	0.362	0.392	0.374	0.382	0.369			0.254143	0.267143	0.238143	0.268143	0.250143	0.258143	0.245143	0.254429	0.00417883
22:55:09	27.6	0.38	0.392	0.362	0.392	0.374	0.382	0.37			0.255857	0.267857	0.237857	0.267857	0.249857	0.257857	0.245857	0.254714	0.0042056
23:00:09	27.6	0.382	0.39	0.359	0.39	0.372	0.379	0.367			0.257714	0.265714	0.234714	0.265714	0.247714	0.254714	0.242714	0.252714	0.00440779
23:05:09	27.6	0.38	0.39	0.362	0.393	0.376	0.381	0.369			0.255857	0.265857	0.237857	0.268857	0.251857	0.256857	0.244857	0.254571	0.00413875
23:10:09	27.6	0.38	0.392	0.364	0.395	0.38	0.384	0.371			0.255429	0.267429	0.239429	0.270429	0.255429	0.259429	0.246429	0.256286	0.00413135
23:15:09	27.6	0.381	0.394	0.363	0.394	0.376	0.383	0.37			0.256571	0.269571	0.238571	0.269571	0.251571	0.258571	0.245571	0.255714	0.00438302
23:20:09	27.6	0.381	0.393	0.352	0.382	0.368	0.373	0.362			0.256286	0.268286	0.227286	0.257286	0.243286	0.248286	0.237286	0.248286	0.00519157
23:25:09	27.6	0.38	0.394	0.357	0.387	0.369	0.378	0.365			0.255143	0.269143	0.232143	0.262143	0.244143	0.253143	0.240143	0.250857	0.00486833
23:30:09	27.6	0.379	0.395	0.36	0.39	0.371	0.381	0.366			0.254857	0.270857	0.235857	0.265857	0.246857	0.256857	0.241857	0.253286	0.00477522
23:35:09	27.6	0.381	0.397	0.359	0.391	0.37	0.38	0.367			0.256714	0.272714	0.234714	0.266714	0.245714	0.255714	0.242714	0.253571	0.00509168
23:40:09	27.6	0.382	0.398	0.362	0.394	0.374	0.382	0.368			0.257571	0.273571	0.237571	0.269571	0.249571	0.257571	0.243571	0.255571	0.00495696
23:45:09	27.6	0.383	0.398	0.361	0.396	0.371	0.383	0.37			0.258286	0.273286	0.236286	0.271286	0.246286	0.258286	0.245286	0.255571	0.00520857
23:50:09	27.6	0.381	0.396	0.362	0.397	0.371	0.384	0.373			0.256429	0.271429	0.237429	0.272429	0.246429	0.259429	0.248429	0.256	0.00491285
23:55:09	27.6	0.382	0.395	0.359	0.393	0.368	0.383	0.372			0.257143	0.270143	0.234143	0.268143	0.243143	0.258143	0.247143	0.254	0.00499251
1 day, 0:00:09	27.6	0.383	0.399	0.359	0.394	0.369	0.384	0.372			0.258	0.274	0.234	0.269	0.244	0.259	0.247	0.255	0.00536301
1 day, 0:05:09	27.6	0.385	0.398	0.357	0.39	0.367	0.38	0.368			0.259714	0.272714	0.231714	0.264714	0.241714	0.254714	0.242714	0.252571	0.00547474
1 day, 0:10:09	27.6	0.387	0.398	0.358	0.391	0.369	0.384	0.372			0.261286	0.272286	0.232286	0.265286	0.243286	0.258286	0.246286	0.254143	0.00529793
1 day, 0:15:09	27.6	0.386	0.399	0.364	0.399	0.373	0.389	0.376			0.260286	0.273286	0.238286	0.273286	0.247286	0.263286	0.250286	0.258	0.00503187
1 day, 0:20:09	27.6	0.385	0.402	0.364	0.395	0.371	0.387	0.373			0.258857	0.275857	0.237857	0.268857	0.244857	0.260857	0.246857	0.256286	0.00518173
1 day, 0:25:09	27.6	0.387	0.399	0.361	0.391	0.37	0.387	0.376			0.260714	0.272714	0.234714	0.264714	0.243714	0.260714	0.249714	0.255286	0.00497545
1 day, 0:30:09	27.6	0.386	0.398	0.362	0.396	0.374	0.388	0.377			0.259571	0.271571	0.235571	0.269571	0.247571	0.261571	0.250571	0.256571	0.00484522
1 day, 0:35:09	27.6	0.385	0.399	0.362	0.396	0.373	0.388	0.379			0.258714	0.272714	0.235714	0.269714	0.246714	0.261714	0.252714	0.256857	0.00490592
1 day, 0:40:09	27.6	0.384	0.4	0.359	0.393	0.37	0.386	0.376			0.258143	0.274143	0.233143	0.267143	0.244143	0.260143	0.250143	0.255286	0.00527541
1 day, 0:45:09	27.6	0.386	0.401	0.361	0.395	0.374	0.39	0.378			0.259143	0.274143	0.234143	0.268143	0.247143	0.263143	0.251143	0.256714	0.00514947
1 day, 0:50:09	27.6	0.389	0.399	0.36	0.395	0.373	0.39	0.379			0.262857	0.272857	0.233857	0.268857	0.246857	0.263857	0.252857	0.257429	0.00518173
1 day, 0:55:09	27.6	0.388	0.401	0.361	0.392	0.371	0.387	0.375			0.261	0.274	0.234	0.265	0.244	0.26	0.248	0.255143	0.00519353
1 day, 1:00:09	27.7	0.388	0.4	0.359	0.392	0.372	0.386	0.374			0.260714	0.272714	0.231714	0.264714	0.244714	0.258714	0.246714	0.254286	0.00527283

## Sheet: M9_SBW25-eWT
Time	T° 600	B3	B5	D2	D4	D6	F3	F5		raw data - medium control mean	B3	B5	D2	D4	D6	F3	F5	Mean	Se
00:00:09	27.1	0.114	0.104	0.11	0.107	0.111	0.106	0.109			0.00642857	-0.00357143	0.00242857	-0.000571429	0.00342857	-0.00157143	0.00142857	0.00114286	0.00126706
00:05:09	27.2	0.113	0.105	0.109	0.108	0.111	0.106	0.109			0.00571429	-0.00228571	0.00171429	0.000714286	0.00371429	-0.00128571	0.00171429	0.00142857	0.00104002
00:10:09	27.2	0.113	0.107	0.11	0.109	0.112	0.107	0.11			0.00542857	-0.000571429	0.00242857	0.00142857	0.00442857	-0.000571429	0.00242857	0.00214286	0.000865043
00:15:09	27.3	0.112	0.106	0.11	0.109	0.112	0.107	0.11			0.00471429	-0.00128571	0.00271429	0.00171429	0.00471429	-0.000285714	0.00271429	0.00214286	0.000868966
00:20:09	27.3	0.112	0.105	0.11	0.11	0.111	0.107	0.11			0.00471429	-0.00228571	0.00271429	0.00271429	0.00371429	-0.000285714	0.00271429	0.002	0.000918443
00:25:09	27.3	0.112	0.105	0.109	0.109	0.111	0.107	0.11			0.00471429	-0.00228571	0.00171429	0.00171429	0.00371429	-0.000285714	0.00271429	0.00171429	0.000899735
00:30:09	27.3	0.112	0.106	0.11	0.108	0.111	0.108	0.11			0.00471429	-0.00128571	0.00271429	0.000714286	0.00371429	0.000714286	0.00271429	0.002	0.000778102
00:35:09	27.4	0.113	0.106	0.11	0.109	0.112	0.108	0.11			0.00614286	-0.000857143	0.00314286	0.00214286	0.00514286	0.00114286	0.00314286	0.00285714	0.000892143
00:40:09	27.4	0.112	0.105	0.111	0.109	0.111	0.108	0.11			0.00471429	-0.00228571	0.00371429	0.00171429	0.00371429	0.000714286	0.00271429	0.00214286	0.000895947
00:45:09	27.4	0.112	0.107	0.111	0.109	0.111	0.108	0.11			0.00514286	0.000142857	0.00414286	0.00214286	0.00414286	0.00114286	0.00314286	0.00285714	0.000680136
00:50:09	27.5	0.113	0.105	0.11	0.109	0.111	0.108	0.11			0.00585714	-0.00214286	0.00285714	0.00185714	0.00385714	0.000857143	0.00285714	0.00228571	0.000947607
00:55:09	27.5	0.113	0.107	0.11	0.109	0.111	0.108	0.11			0.006	0	0.003	0.002	0.004	0.001	0.003	0.00271429	0.000746876
01:00:09	27.5	0.113	0.106	0.111	0.109	0.111	0.108	0.11			0.006	-0.001	0.004	0.002	0.004	0.001	0.003	0.00271429	0.000865043
01:05:09	27.5	0.113	0.106	0.111	0.11	0.111	0.109	0.111			0.00542857	-0.00157143	0.00342857	0.00242857	0.00342857	0.00142857	0.00342857	0.00257143	0.0008289
01:10:09	27.5	0.113	0.108	0.112	0.111	0.113	0.111	0.112			0.00385714	-0.00114286	0.00285714	0.00185714	0.00385714	0.00185714	0.00285714	0.00228571	0.000649437
01:15:09	27.5	0.113	0.11	0.115	0.116	0.115	0.113	0.114			0.002	-0.001	0.004	0.005	0.004	0.002	0.003	0.00271429	0.000746876
01:20:09	27.5	0.113	0.112	0.116	0.115	0.117	0.115	0.116			0.000285714	-0.000714286	0.00328571	0.00228571	0.00428571	0.00228571	0.00328571	0.00214286	0.000670059
01:25:09	27.5	0.113	0.115	0.118	0.118	0.12	0.117	0.118			-0.00185714	0.000142857	0.00314286	0.00314286	0.00514286	0.00214286	0.00314286	0.00214286	0.000872872
01:30:09	27.5	0.113	0.118	0.121	0.124	0.123	0.12	0.121			-0.00442857	0.000571429	0.00357143	0.00657143	0.00557143	0.00257143	0.00357143	0.00257143	0.00138013
01:35:09	27.5	0.113	0.12	0.123	0.123	0.125	0.122	0.123			-0.00685714	0.000142857	0.00314286	0.00314286	0.00514286	0.00214286	0.00314286	0.00142857	0.00149147
01:40:09	27.5	0.114	0.122	0.125	0.126	0.127	0.124	0.126			-0.008	0	0.003	0.004	0.005	0.002	0.004	0.00142857	0.0016883
01:45:09	27.5	0.114	0.125	0.127	0.128	0.13	0.126	0.128			-0.0104286	0.000571429	0.00257143	0.00357143	0.00557143	0.00157143	0.00357143	0.001	0.0019983
01:50:09	27.5	0.114	0.126	0.128	0.13	0.132	0.128	0.13			-0.0121429	-0.000142857	0.00185714	0.00385714	0.00585714	0.00185714	0.00385714	0.000714286	0.00226178
01:55:09	27.5	0.114	0.128	0.13	0.132	0.135	0.13	0.132			-0.0141429	-0.000142857	0.00185714	0.00385714	0.00685714	0.00185714	0.00385714	0.000571429	0.00258857
02:00:09	27.5	0.115	0.129	0.132	0.134	0.136	0.132	0.134			-0.0145714	-0.000571429	0.00242857	0.00442857	0.00642857	0.00242857	0.00442857	0.000714286	0.00267897
02:05:09	27.5	0.116	0.131	0.133	0.134	0.137	0.133	0.135			-0.0148571	0.000142857	0.00214286	0.00314286	0.00614286	0.00214286	0.00414286	0.000428571	0.00264318
02:10:09	27.5	0.117	0.132	0.135	0.135	0.138	0.134	0.136			-0.0151429	-0.000142857	0.00285714	0.00285714	0.00585714	0.00185714	0.00385714	0.000285714	0.00266241
02:15:09	27.5	0.118	0.133	0.136	0.139	0.139	0.136	0.138			-0.0154286	-0.000428571	0.00257143	0.00557143	0.00557143	0.00257143	0.00457143	0.000714286	0.0028067
02:20:09	27.5	0.119	0.134	0.137	0.138	0.14	0.137	0.138			-0.0155714	-0.000571429	0.00242857	0.00342857	0.00542857	0.00242857	0.00342857	0.000142857	0.0027055
02:25:09	27.5	0.12	0.137	0.137	0.139	0.141	0.138	0.139			-0.0154286	0.00157143	0.00157143	0.00357143	0.00557143	0.00257143	0.00357143	0.000428571	0.00269416
02:30:09	27.5	0.121	0.137	0.138	0.14	0.141	0.138	0.14			-0.0154286	0.000571429	0.00157143	0.00357143	0.00457143	0.00157143	0.00357143	7.93016e-18	0.0026264
02:35:09	27.5	0.123	0.138	0.139	0.14	0.142	0.139	0.141			-0.0145714	0.000428571	0.00142857	0.00242857	0.00442857	0.00142857	0.00342857	-0.000142857	0.00245781
02:40:09	27.5	0.124	0.138	0.14	0.141	0.143	0.14	0.143			-0.0141429	-0.000142857	0.00185714	0.00285714	0.00485714	0.00185714	0.00485714	0.000285714	0.00249626
02:45:09	27.5	0.125	0.139	0.14	0.146	0.144	0.141	0.144			-0.0134286	0.000571429	0.00157143	0.00757143	0.00557143	0.00257143	0.00557143	0.00142857	0.00264961
02:50:09	27.5	0.126	0.139	0.14	0.143	0.144	0.14	0.144			-0.0125714	0.000428571	0.00142857	0.00442857	0.00542857	0.00142857	0.00542857	0.000857143	0.00236902
02:55:09	27.5	0.127	0.139	0.14	0.146	0.144	0.14	0.145			-0.0117143	0.000285714	0.00128571	0.00728571	0.00528571	0.00128571	0.00628571	0.00142857	0.00242437
03:00:09	27.5	0.129	0.138	0.14	0.148	0.144	0.14	0.146			-0.00942857	-0.000428571	0.00157143	0.00957143	0.00557143	0.00157143	0.00757143	0.00228571	0.00237762
03:05:09	27.5	0.13	0.139	0.141	0.143	0.144	0.14	0.146			-0.00871429	0.000285714	0.00228571	0.00428571	0.00528571	0.00128571	0.00728571	0.00171429	0.00196223
03:10:09	27.5	0.131	0.139	0.14	0.145	0.144	0.14	0.146			-0.00742857	0.000571429	0.00157143	0.00657143	0.00557143	0.00157143	0.00757143	0.00228571	0.00192372
03:15:09	27.5	0.132	0.14	0.14	0.146	0.142	0.139	0.146			-0.00657143	0.00142857	0.00142857	0.00742857	0.00342857	0.000428571	0.00742857	0.00214286	0.0018089
03:20:09	27.6	0.133	0.14	0.14	0.142	0.142	0.14	0.146			-0.00514286	0.00185714	0.00185714	0.00385714	0.00385714	0.00185714	0.00785714	0.00228571	0.00147773
03:25:09	27.6	0.134	0.139	0.139	0.145	0.141	0.139	0.146			-0.00385714	0.00114286	0.00114286	0.00714286	0.00314286	0.00114286	0.00814286	0.00257143	0.00154083
03:30:09	27.6	0.135	0.14	0.14	0.147	0.141	0.139	0.146			-0.00242857	0.00257143	0.00257143	0.00957143	0.00357143	0.00157143	0.00857143	0.00371429	0.00156492
03:35:09	27.6	0.136	0.139	0.14	0.146	0.141	0.14	0.147			-0.00114286	0.00185714	0.00285714	0.00885714	0.00385714	0.00285714	0.00985714	0.00414286	0.00147542
03:40:09	27.6	0.137	0.139	0.141	0.144	0.142	0.14	0.147			-0.000142857	0.00185714	0.00385714	0.00685714	0.00485714	0.00285714	0.00985714	0.00428571	0.00125085
03:45:09	27.6	0.138	0.138	0.14	0.147	0.141	0.141	0.147			0.00157143	0.00157143	0.00357143	0.0105714	0.00457143	0.00457143	0.0105714	0.00528571	0.00144279
03:50:09	27.6	0.138	0.138	0.14	0.147	0.142	0.14	0.147			0.00228571	0.00228571	0.00428571	0.0112857	0.00628571	0.00428571	0.0112857	0.006	0.0014592
03:55:09	27.6	0.138	0.139	0.141	0.144	0.144	0.141	0.148			0.00171429	0.00271429	0.00471429	0.00771429	0.00771429	0.00471429	0.0117143	0.00585714	0.00129887
04:00:09	27.6	0.14	0.139	0.141	0.149	0.141	0.141	0.149			0.00385714	0.00285714	0.00485714	0.0128571	0.00485714	0.00485714	0.0128571	0.00671429	0.00160992
04:05:09	27.6	0.14	0.14	0.142	0.147	0.14	0.14	0.148			0.00357143	0.00357143	0.00557143	0.0105714	0.00357143	0.00357143	0.0115714	0.006	0.00134265
04:10:09	27.6	0.141	0.14	0.142	0.15	0.141	0.141	0.147			0.00514286	0.00414286	0.00614286	0.0141429	0.00514286	0.00514286	0.0111429	0.00728571	0.00143806
04:15:09	27.6	0.142	0.142	0.142	0.145	0.141	0.141	0.147			0.00642857	0.00642857	0.00642857	0.00942857	0.00542857	0.00542857	0.0114286	0.00728571	0.000857143
04:20:09	27.6	0.142	0.141	0.143	0.151	0.141	0.14	0.147			0.00685714	0.00585714	0.00785714	0.0158571	0.00585714	0.00485714	0.0118571	0.00842857	0.00150961
04:25:09	27.6	0.143	0.141	0.143	0.15	0.141	0.141	0.146			0.00828571	0.00628571	0.00828571	0.0152857	0.00628571	0.00628571	0.0112857	0.00885714	0.00126974
04:30:09	27.6	0.145	0.14	0.143	0.149	0.142	0.141	0.146			0.0105714	0.00557143	0.00857143	0.0145714	0.00757143	0.00657143	0.0115714	0.00928571	0.00118952
04:35:09	27.6	0.145	0.139	0.143	0.146	0.142	0.14	0.146			0.0107143	0.00471429	0.00871429	0.0117143	0.00771429	0.00571429	0.0117143	0.00871429	0.00106904
04:40:09	27.6	0.145	0.139	0.144	0.144	0.142	0.141	0.147			0.0118571	0.00585714	0.0108571	0.0108571	0.00885714	0.00785714	0.0138571	0.01	0.00101015
04:45:09	27.6	0.147	0.139	0.144	0.152	0.142	0.14	0.146			0.014	0.006	0.011	0.019	0.009	0.007	0.013	0.0112857	0.00170034
04:50:09	27.6	0.147	0.138	0.145	0.147	0.141	0.141	0.146			0.0138571	0.00485714	0.0118571	0.0138571	0.00785714	0.00785714	0.0128571	0.0104286	0.00134265
04:55:09	27.6	0.148	0.139	0.146	0.146	0.141	0.142	0.145			0.0148571	0.00585714	0.0128571	0.0128571	0.00785714	0.00885714	0.0118571	0.0107143	0.00122336
05:00:09	27.6	0.15	0.14	0.146	0.147	0.141	0.143	0.146			0.0171429	0.00714286	0.0131429	0.0141429	0.00814286	0.0101429	0.0131429	0.0118571	0.00134012
05:05:09	27.6	0.151	0.141	0.148	0.15	0.141	0.144	0.146			0.0184286	0.00842857	0.0154286	0.0174286	0.00842857	0.0114286	0.0134286	0.0132857	0.00153419
05:10:09	27.6	0.151	0.141	0.147	0.151	0.141	0.143	0.146			0.019	0.009	0.015	0.019	0.009	0.011	0.014	0.0137143	0.00161414
05:15:09	27.6	0.153	0.141	0.149	0.144	0.141	0.143	0.147			0.0214286	0.00942857	0.0174286	0.0124286	0.00942857	0.0114286	0.0154286	0.0138571	0.0016883
05:20:09	27.6	0.153	0.141	0.149	0.146	0.142	0.144	0.146			0.022	0.01	0.018	0.015	0.011	0.013	0.015	0.0148571	0.00156492
05:25:09	27.6	0.154	0.143	0.148	0.149	0.142	0.144	0.145			0.0232857	0.0122857	0.0172857	0.0182857	0.0112857	0.0132857	0.0142857	0.0157143	0.00158651
05:30:09	27.6	0.155	0.142	0.149	0.145	0.142	0.145	0.146			0.0254286	0.0124286	0.0194286	0.0154286	0.0124286	0.0154286	0.0164286	0.0167143	0.00171429
05:35:09	27.6	0.156	0.142	0.15	0.154	0.142	0.145	0.146			0.0265714	0.0125714	0.0205714	0.0245714	0.0125714	0.0155714	0.0165714	0.0184286	0.00212052
05:40:09	27.6	0.156	0.144	0.151	0.148	0.142	0.146	0.147			0.0267143	0.0147143	0.0217143	0.0187143	0.0127143	0.0167143	0.0177143	0.0184286	0.00175546
05:45:09	27.6	0.158	0.143	0.152	0.148	0.141	0.145	0.147			0.0291429	0.0141429	0.0231429	0.0191429	0.0121429	0.0161429	0.0181429	0.0188571	0.00217906
05:50:09	27.6	0.158	0.144	0.154	0.147	0.141	0.145	0.149			0.0292857	0.0152857	0.0252857	0.0182857	0.0122857	0.0162857	0.0202857	0.0195714	0.00224366
05:55:09	27.6	0.16	0.143	0.153	0.147	0.143	0.146	0.148			0.0321429	0.0151429	0.0251429	0.0191429	0.0151429	0.0181429	0.0201429	0.0207143	0.00229759
06:00:09	27.6	0.16	0.143	0.153	0.15	0.143	0.146	0.148			0.0324286	0.0154286	0.0254286	0.0224286	0.0154286	0.0184286	0.0204286	0.0214286	0.00228869
06:05:09	27.6	0.162	0.146	0.154	0.157	0.143	0.147	0.149			0.0348571	0.0188571	0.0268571	0.0298571	0.0158571	0.0198571	0.0218571	0.024	0.00255817
06:10:09	27.6	0.164	0.146	0.154	0.151	0.143	0.146	0.15			0.037	0.019	0.027	0.024	0.016	0.019	0.023	0.0235714	0.00263545
06:15:09	27.6	0.165	0.147	0.154	0.152	0.143	0.147	0.15			0.0385714	0.0205714	0.0275714	0.0255714	0.0165714	0.0205714	0.0235714	0.0247143	0.00268531
06:20:09	27.6	0.166	0.148	0.155	0.153	0.144	0.149	0.15			0.0394286	0.0214286	0.0284286	0.0264286	0.0174286	0.0224286	0.0234286	0.0255714	0.00266752
06:25:09	27.6	0.167	0.148	0.155	0.159	0.145	0.15	0.15			0.0408571	0.0218571	0.0288571	0.0328571	0.0188571	0.0238571	0.0238571	0.0272857	0.00285238
06:30:08	27.6	0.167	0.149	0.156	0.154	0.145	0.151	0.151			0.0411429	0.0231429	0.0301429	0.0281429	0.0191429	0.0251429	0.0251429	0.0274286	0.00264318
06:35:09	27.6	0.169	0.149	0.158	0.154	0.146	0.153	0.153			0.0435714	0.0235714	0.0325714	0.0285714	0.0205714	0.0275714	0.0275714	0.0291429	0.00280185
06:40:09	27.6	0.17	0.149	0.158	0.154	0.147	0.154	0.152			0.0457143	0.0247143	0.0337143	0.0297143	0.0227143	0.0297143	0.0277143	0.0305714	0.00286546
06:45:09	27.6	0.171	0.15	0.157	0.153	0.148	0.154	0.152			0.047	0.026	0.033	0.029	0.024	0.03	0.028	0.031	0.00287849
06:50:09	27.6	0.172	0.149	0.156	0.153	0.15	0.153	0.153			0.048	0.025	0.032	0.029	0.026	0.029	0.029	0.0311429	0.0029393
06:55:09	27.6	0.172	0.151	0.156	0.154	0.151	0.153	0.153			0.0485714	0.0275714	0.0325714	0.0305714	0.0275714	0.0295714	0.0295714	0.0322857	0.00279212
07:00:09	27.6	0.172	0.152	0.157	0.155	0.152	0.153	0.153			0.0485714	0.0285714	0.0335714	0.0315714	0.0285714	0.0295714	0.0295714	0.0328571	0.0027055
07:05:09	27.6	0.172	0.151	0.158	0.157	0.154	0.154	0.152			0.0485714	0.0275714	0.0345714	0.0335714	0.0305714	0.0305714	0.0285714	0.0334286	0.00269416
07:10:09	27.6	0.173	0.152	0.158	0.156	0.155	0.155	0.152			0.0497143	0.0287143	0.0347143	0.0327143	0.0317143	0.0317143	0.0287143	0.034	0.00274048
07:15:09	27.6	0.173	0.153	0.159	0.157	0.154	0.155	0.15			0.0498571	0.0298571	0.0358571	0.0338571	0.0308571	0.0318571	0.0268571	0.0341429	0.00283443
07:20:09	27.6	0.175	0.152	0.16	0.158	0.155	0.154	0.149			0.0511429	0.0281429	0.0361429	0.0341429	0.0311429	0.0301429	0.0251429	0.0337143	0.00321349
07:25:09	27.6	0.177	0.153	0.16	0.158	0.154	0.154	0.15			0.0534286	0.0294286	0.0364286	0.0344286	0.0304286	0.0304286	0.0264286	0.0344286	0.00340168
07:30:09	27.6	0.177	0.155	0.162	0.158	0.154	0.154	0.151			0.0535714	0.0315714	0.0385714	0.0345714	0.0305714	0.0305714	0.0275714	0.0352857	0.00332175
07:35:09	27.6	0.176	0.156	0.162	0.159	0.155	0.155	0.152			0.0527143	0.0327143	0.0387143	0.0357143	0.0317143	0.0317143	0.0287143	0.036	0.00303718
07:40:09	27.6	0.176	0.158	0.164	0.158	0.155	0.155	0.152			0.0528571	0.0348571	0.0408571	0.0348571	0.0318571	0.0318571	0.0288571	0.0365714	0.00306061
07:45:09	27.6	0.177	0.161	0.165	0.16	0.155	0.156	0.154			0.0538571	0.0378571	0.0418571	0.0368571	0.0318571	0.0328571	0.0308571	0.038	0.00301921
07:50:09	27.6	0.177	0.164	0.17	0.161	0.156	0.158	0.155			0.054	0.041	0.047	0.038	0.033	0.035	0.032	0.04	0.00303942
07:55:09	27.6	0.178	0.167	0.178	0.162	0.157	0.158	0.157			0.0552857	0.0442857	0.0552857	0.0392857	0.0342857	0.0352857	0.0342857	0.0425714	0.0035437
08:00:09	27.6	0.18	0.175	0.205	0.162	0.158	0.159	0.161			0.0577143	0.0527143	0.0827143	0.0397143	0.0357143	0.0367143	0.0387143	0.0491429	0.00644706
08:05:09	27.6	0.181	0.186	0.237	0.162	0.159	0.159	0.165			0.0587143	0.0637143	0.114714	0.0397143	0.0367143	0.0367143	0.0427143	0.0561429	0.0105782
08:10:09	27.6	0.182	0.224	0.257	0.163	0.16	0.16	0.174			0.0598571	0.101857	0.134857	0.0408571	0.0378571	0.0378571	0.0518571	0.0664286	0.0142091
08:15:09	27.6	0.188	0.247	0.285	0.165	0.162	0.161	0.186			0.0665714	0.125571	0.163571	0.0435714	0.0405714	0.0395714	0.0645714	0.0777143	0.0182306
08:20:09	27.6	0.19	0.279	0.322	0.168	0.164	0.162	0.188			0.0695714	0.158571	0.201571	0.0475714	0.0435714	0.0415714	0.0675714	0.09	0.024089
08:25:09	27.6	0.202	0.266	0.299	0.171	0.168	0.167	0.202			0.0817143	0.145714	0.178714	0.0507143	0.0477143	0.0467143	0.0817143	0.0904286	0.0197095
08:30:09	27.6	0.227	0.273	0.318	0.179	0.179	0.177	0.255			0.107	0.153	0.198	0.059	0.059	0.057	0.135	0.109714	0.0208381
08:35:09	27.6	0.244	0.313	0.303	0.187	0.185	0.189	0.305			0.124	0.193	0.183	0.067	0.065	0.069	0.185	0.126571	0.0227155
08:40:09	27.7	0.239	0.317	0.309	0.217	0.19	0.197	0.299			0.118714	0.196714	0.188714	0.0967143	0.0697143	0.0767143	0.178714	0.132286	0.0206696
08:45:09	27.7	0.261	0.332	0.319	0.23	0.195	0.224	0.331			0.140571	0.211571	0.198571	0.109571	0.0745714	0.103571	0.210571	0.149857	0.021485
08:50:09	27.7	0.249	0.323	0.327	0.238	0.258	0.246	0.327			0.128571	0.202571	0.206571	0.117571	0.137571	0.125571	0.206571	0.160714	0.0159036
08:55:09	27.7	0.273	0.33	0.332	0.238	0.274	0.254	0.333			0.153	0.21	0.212	0.118	0.154	0.134	0.213	0.170571	0.0152407
09:00:09	27.7	0.266	0.327	0.336	0.245	0.282	0.258	0.333			0.146	0.207	0.216	0.125	0.162	0.138	0.213	0.172429	0.0146236
09:05:09	27.7	0.279	0.336	0.339	0.262	0.296	0.261	0.336			0.159	0.216	0.219	0.142	0.176	0.141	0.216	0.181286	0.0133839
09:10:09	27.7	0.296	0.342	0.347	0.288	0.293	0.276	0.339			0.176	0.222	0.227	0.168	0.173	0.156	0.219	0.191571	0.0112776
09:15:09	27.7	0.295	0.336	0.355	0.3	0.309	0.29	0.341			0.175286	0.216286	0.235286	0.180286	0.189286	0.170286	0.221286	0.198286	0.00968553
09:20:09	27.7	0.313	0.338	0.339	0.318	0.315	0.303	0.343			0.193	0.218	0.219	0.198	0.195	0.183	0.223	0.204143	0.00589765
09:25:09	27.7	0.31	0.35	0.352	0.314	0.313	0.304	0.345			0.190286	0.230286	0.232286	0.194286	0.193286	0.184286	0.225286	0.207143	0.00795951
09:30:09	27.7	0.33	0.337	0.342	0.312	0.308	0.306	0.336			0.21	0.217	0.222	0.192	0.188	0.186	0.216	0.204429	0.00576466
09:35:09	27.7	0.321	0.339	0.354	0.313	0.308	0.309	0.336			0.201143	0.219143	0.234143	0.193143	0.188143	0.189143	0.216143	0.205857	0.00665373
09:40:09	27.7	0.343	0.344	0.358	0.321	0.316	0.313	0.333			0.222857	0.223857	0.237857	0.200857	0.195857	0.192857	0.212857	0.212429	0.00632025
09:45:09	27.7	0.333	0.34	0.365	0.322	0.326	0.318	0.333			0.213714	0.220714	0.245714	0.202714	0.206714	0.198714	0.213714	0.214571	0.00590169
09:50:09	27.7	0.329	0.342	0.363	0.317	0.328	0.314	0.33			0.209571	0.222571	0.243571	0.197571	0.208571	0.194571	0.210571	0.212429	0.00624663
09:55:09	27.7	0.338	0.346	0.385	0.32	0.316	0.317	0.327			0.219143	0.227143	0.266143	0.201143	0.197143	0.198143	0.208143	0.216714	0.00926041
10:00:09	27.7	0.346	0.353	0.378	0.326	0.315	0.318	0.33			0.227143	0.234143	0.259143	0.207143	0.196143	0.199143	0.211143	0.219143	0.00848809
10:05:09	27.7	0.339	0.357	0.393	0.332	0.318	0.325	0.337			0.219714	0.237714	0.273714	0.212714	0.198714	0.205714	0.217714	0.223714	0.0095344
10:10:09	27.7	0.345	0.363	0.388	0.332	0.317	0.327	0.336			0.226429	0.244429	0.269429	0.213429	0.198429	0.208429	0.217429	0.225429	0.00915995
10:15:09	27.7	0.36	0.365	0.39	0.331	0.315	0.329	0.339			0.241429	0.246429	0.271429	0.212429	0.196429	0.210429	0.220429	0.228429	0.00977119
10:20:09	27.7	0.378	0.362	0.384	0.328	0.308	0.325	0.341			0.259429	0.243429	0.265429	0.209429	0.189429	0.206429	0.222429	0.228	0.0108625
10:25:09	27.7	0.378	0.372	0.38	0.331	0.311	0.328	0.345			0.259286	0.253286	0.261286	0.212286	0.192286	0.209286	0.226286	0.230571	0.0104145
10:30:09	27.7	0.371	0.38	0.372	0.337	0.317	0.335	0.346			0.252	0.261	0.253	0.218	0.198	0.216	0.227	0.232143	0.00888398
10:35:09	27.7	0.386	0.39	0.364	0.34	0.324	0.337	0.345			0.267571	0.271571	0.245571	0.221571	0.205571	0.218571	0.226571	0.236714	0.00960761
10:40:09	27.7	0.382	0.393	0.359	0.342	0.325	0.339	0.346			0.263571	0.274571	0.240571	0.223571	0.206571	0.220571	0.227571	0.236714	0.00925159
10:45:09	27.7	0.37	0.392	0.352	0.35	0.325	0.342	0.333			0.251429	0.273429	0.233429	0.231429	0.206429	0.223429	0.214429	0.233429	0.00861615
10:50:09	27.7	0.369	0.393	0.339	0.357	0.331	0.343	0.344			0.250286	0.274286	0.220286	0.238286	0.212286	0.224286	0.225286	0.235	0.00806141
10:55:09	27.7	0.363	0.385	0.329	0.351	0.355	0.349	0.341			0.244143	0.266143	0.210143	0.232143	0.236143	0.230143	0.222143	0.234429	0.00666803
11:00:09	27.7	0.357	0.38	0.326	0.366	0.332	0.35	0.338			0.238286	0.261286	0.207286	0.247286	0.213286	0.231286	0.219286	0.231143	0.00731739
11:05:09	27.7	0.348	0.374	0.324	0.368	0.344	0.367	0.332			0.229429	0.255429	0.205429	0.249429	0.225429	0.248429	0.213429	0.232429	0.00727357
11:10:09	27.7	0.342	0.368	0.322	0.367	0.335	0.366	0.329			0.223571	0.249571	0.203571	0.248571	0.216571	0.247571	0.210571	0.228571	0.00743223
11:15:09	27.7	0.339	0.362	0.324	0.36	0.333	0.345	0.324			0.221143	0.244143	0.206143	0.242143	0.215143	0.227143	0.206143	0.223143	0.00590399
11:20:09	27.7	0.332	0.359	0.325	0.349	0.34	0.331	0.32			0.214143	0.241143	0.207143	0.231143	0.222143	0.213143	0.202143	0.218714	0.00518632
11:25:09	27.7	0.331	0.355	0.322	0.339	0.332	0.323	0.317			0.213571	0.237571	0.204571	0.221571	0.214571	0.205571	0.199571	0.213857	0.00483398
11:30:09	27.7	0.333	0.353	0.32	0.333	0.327	0.316	0.313			0.215286	0.235286	0.202286	0.215286	0.209286	0.198286	0.195286	0.210143	0.00513823
11:35:09	27.7	0.336	0.355	0.32	0.325	0.324	0.313	0.313			0.218286	0.237286	0.202286	0.207286	0.206286	0.195286	0.195286	0.208857	0.00560126
11:40:09	27.7	0.338	0.353	0.322	0.319	0.321	0.308	0.311			0.220714	0.235714	0.204714	0.201714	0.203714	0.190714	0.193714	0.207286	0.00597159
11:45:09	27.7	0.336	0.352	0.324	0.315	0.318	0.306	0.312			0.218571	0.234571	0.206571	0.197571	0.200571	0.188571	0.194571	0.205857	0.0059949
11:50:09	27.7	0.336	0.354	0.325	0.314	0.317	0.307	0.313			0.218429	0.236429	0.207429	0.196429	0.199429	0.189429	0.195429	0.206143	0.00617874
11:55:09	27.7	0.336	0.354	0.325	0.311	0.316	0.307	0.313			0.219143	0.237143	0.208143	0.194143	0.199143	0.190143	0.196143	0.206286	0.00632993
12:00:09	27.7	0.336	0.351	0.328	0.312	0.314	0.307	0.316			0.219	0.234	0.211	0.195	0.197	0.19	0.199	0.206429	0.00594361
12:05:09	27.7	0.335	0.349	0.325	0.31	0.31	0.307	0.314			0.218286	0.232286	0.208286	0.193286	0.193286	0.190286	0.197286	0.204714	0.00593961
12:10:09	27.7	0.336	0.344	0.326	0.31	0.31	0.306	0.315			0.219286	0.227286	0.209286	0.193286	0.193286	0.189286	0.198286	0.204286	0.00552484
12:15:09	27.7	0.339	0.345	0.327	0.312	0.311	0.309	0.317			0.222286	0.228286	0.210286	0.195286	0.194286	0.192286	0.200286	0.206143	0.00546168
12:20:09	27.7	0.339	0.343	0.326	0.312	0.311	0.306	0.313			0.222143	0.226143	0.209143	0.195143	0.194143	0.189143	0.196143	0.204571	0.00556715
12:25:09	27.7	0.341	0.342	0.326	0.312	0.311	0.306	0.314			0.223857	0.224857	0.208857	0.194857	0.193857	0.188857	0.196857	0.204571	0.00560066
12:30:09	27.7	0.34	0.339	0.325	0.309	0.31	0.305	0.313			0.223	0.222	0.208	0.192	0.193	0.188	0.196	0.203143	0.00552237
12:35:09	27.7	0.341	0.336	0.323	0.309	0.31	0.305	0.313			0.223714	0.218714	0.205714	0.191714	0.192714	0.187714	0.195714	0.202286	0.00534459
12:40:09	27.7	0.344	0.341	0.325	0.309	0.311	0.306	0.314			0.226857	0.223857	0.207857	0.191857	0.193857	0.188857	0.196857	0.204286	0.00589938
12:45:09	27.7	0.344	0.342	0.328	0.31	0.313	0.307	0.313			0.226571	0.224571	0.210571	0.192571	0.195571	0.189571	0.195571	0.205	0.00587512
12:50:09	27.7	0.344	0.343	0.327	0.309	0.312	0.308	0.314			0.226571	0.225571	0.209571	0.191571	0.194571	0.190571	0.196571	0.205	0.00593158
12:55:09	27.7	0.342	0.34	0.326	0.31	0.312	0.31	0.315			0.224857	0.222857	0.208857	0.192857	0.194857	0.192857	0.197857	0.205	0.00529343
13:00:09	27.7	0.342	0.34	0.326	0.312	0.314	0.311	0.316			0.224571	0.222571	0.208571	0.194571	0.196571	0.193571	0.198571	0.205571	0.00500951
13:05:09	27.7	0.34	0.338	0.325	0.309	0.311	0.312	0.316			0.222571	0.220571	0.207571	0.191571	0.193571	0.194571	0.198571	0.204143	0.00491285
13:10:09	27.7	0.342	0.343	0.324	0.31	0.313	0.313	0.317			0.224571	0.225571	0.206571	0.192571	0.195571	0.195571	0.199571	0.205714	0.00527089
13:15:09	27.7	0.342	0.342	0.327	0.313	0.314	0.314	0.319			0.224571	0.224571	0.209571	0.195571	0.196571	0.196571	0.201571	0.207	0.00488368
13:20:09	27.7	0.344	0.341	0.327	0.313	0.313	0.315	0.32			0.226	0.223	0.209	0.195	0.195	0.197	0.202	0.206714	0.00496039
13:25:09	27.7	0.342	0.339	0.326	0.31	0.311	0.311	0.316			0.224286	0.221286	0.208286	0.192286	0.193286	0.193286	0.198286	0.204429	0.00517976
13:30:09	27.7	0.342	0.339	0.326	0.309	0.311	0.31	0.313			0.224429	0.221429	0.208429	0.191429	0.193429	0.192429	0.195429	0.203857	0.00538453
13:35:09	27.7	0.341	0.34	0.327	0.31	0.31	0.313	0.315			0.223286	0.222286	0.209286	0.192286	0.192286	0.195286	0.197286	0.204571	0.00518107
13:40:09	27.7	0.34	0.337	0.325	0.311	0.31	0.312	0.314			0.222143	0.219143	0.207143	0.193143	0.192143	0.194143	0.196143	0.203429	0.0048389
13:45:09	27.7	0.342	0.337	0.325	0.309	0.31	0.312	0.314			0.223714	0.218714	0.206714	0.190714	0.191714	0.193714	0.195714	0.203	0.00513491
13:50:09	27.7	0.35	0.344	0.329	0.31	0.312	0.314	0.314			0.231857	0.225857	0.210857	0.191857	0.193857	0.195857	0.195857	0.206571	0.00624391
13:55:09	27.7	0.349	0.341	0.329	0.311	0.311	0.315	0.315			0.230857	0.222857	0.210857	0.192857	0.192857	0.196857	0.196857	0.206286	0.00585075
14:00:09	27.7	0.346	0.339	0.328	0.31	0.31	0.315	0.314			0.227571	0.220571	0.209571	0.191571	0.191571	0.196571	0.195571	0.204714	0.00554818
14:05:09	27.7	0.348	0.341	0.329	0.311	0.311	0.318	0.316			0.229571	0.222571	0.210571	0.192571	0.192571	0.199571	0.197571	0.206429	0.00561218
14:10:09	27.7	0.348	0.34	0.329	0.31	0.306	0.317	0.315			0.229286	0.221286	0.210286	0.191286	0.187286	0.198286	0.196286	0.204857	0.00598752
14:15:09	27.7	0.349	0.344	0.333	0.312	0.308	0.319	0.317			0.230143	0.225143	0.214143	0.193143	0.189143	0.200143	0.198143	0.207143	0.00607885
14:20:09	27.7	0.353	0.344	0.335	0.314	0.31	0.321	0.319			0.234	0.225	0.216	0.195	0.191	0.202	0.2	0.209	0.00613344
14:25:09	27.7	0.352	0.345	0.336	0.313	0.31	0.321	0.318			0.232857	0.225857	0.216857	0.193857	0.190857	0.201857	0.198857	0.208714	0.00622372
14:30:09	27.7	0.351	0.346	0.337	0.314	0.31	0.323	0.318			0.231714	0.226714	0.217714	0.194714	0.190714	0.203714	0.198714	0.209143	0.006129
14:35:09	27.7	0.351	0.346	0.34	0.316	0.313	0.326	0.319			0.232143	0.227143	0.221143	0.197143	0.194143	0.207143	0.200143	0.211286	0.00581226
14:40:09	27.7	0.352	0.349	0.343	0.318	0.314	0.326	0.32			0.232857	0.229857	0.223857	0.198857	0.194857	0.206857	0.200857	0.212571	0.0059949
14:45:09	27.7	0.353	0.35	0.343	0.319	0.316	0.327	0.321			0.233714	0.230714	0.223714	0.199714	0.196714	0.207714	0.201714	0.213429	0.00588264
14:50:09	27.7	0.35	0.348	0.342	0.319	0.315	0.327	0.322			0.230571	0.228571	0.222571	0.199571	0.195571	0.207571	0.202571	0.212429	0.00548343
14:55:09	27.7	0.347	0.346	0.341	0.319	0.315	0.329	0.323			0.227286	0.226286	0.221286	0.199286	0.195286	0.209286	0.203286	0.211714	0.00499455
15:00:09	27.7	0.35	0.349	0.343	0.321	0.315	0.33	0.324			0.230143	0.229143	0.223143	0.201143	0.195143	0.210143	0.204143	0.213286	0.00535158
15:05:09	27.7	0.351	0.35	0.345	0.322	0.316	0.333	0.326			0.230857	0.229857	0.224857	0.201857	0.195857	0.212857	0.205857	0.214571	0.00533503
15:10:09	27.7	0.354	0.352	0.347	0.323	0.317	0.332	0.326			0.233714	0.231714	0.226714	0.202714	0.196714	0.211714	0.205714	0.215571	0.00566286
15:15:09	27.7	0.353	0.353	0.346	0.323	0.318	0.332	0.326			0.232429	0.232429	0.225429	0.202429	0.197429	0.211429	0.205429	0.215286	0.00553529
15:20:09	27.7	0.354	0.352	0.347	0.323	0.318	0.332	0.326			0.233429	0.231429	0.226429	0.202429	0.197429	0.211429	0.205429	0.215429	0.00558484
15:25:09	27.7	0.352	0.349	0.347	0.321	0.319	0.331	0.327			0.231143	0.228143	0.226143	0.200143	0.198143	0.210143	0.206143	0.214286	0.00525732
15:30:09	27.7	0.35	0.347	0.346	0.321	0.319	0.331	0.326			0.228857	0.225857	0.224857	0.199857	0.197857	0.209857	0.204857	0.213143	0.00496518
15:35:09	27.7	0.354	0.349	0.347	0.321	0.32	0.333	0.327			0.233286	0.228286	0.226286	0.200286	0.199286	0.212286	0.206286	0.215143	0.00531139
15:40:09	27.7	0.356	0.35	0.347	0.322	0.319	0.332	0.327			0.235143	0.229143	0.226143	0.201143	0.198143	0.211143	0.206143	0.215286	0.00556104
15:45:09	27.7	0.356	0.35	0.349	0.322	0.317	0.332	0.327			0.235714	0.229714	0.228714	0.201714	0.196714	0.211714	0.206714	0.215857	0.00581226
15:50:09	27.7	0.359	0.35	0.348	0.322	0.316	0.333	0.329			0.238857	0.229857	0.227857	0.201857	0.195857	0.212857	0.208857	0.216571	0.00601472
15:55:09	27.7	0.361	0.355	0.351	0.326	0.319	0.337	0.332			0.240429	0.234429	0.230429	0.205429	0.198429	0.216429	0.211429	0.219571	0.00596988
16:00:09	27.7	0.361	0.353	0.35	0.325	0.322	0.339	0.332			0.240714	0.232714	0.229714	0.204714	0.201714	0.218714	0.211714	0.22	0.0056134
16:05:09	27.7	0.36	0.354	0.353	0.327	0.324	0.341	0.336			0.24	0.234	0.233	0.207	0.204	0.221	0.216	0.222143	0.00528893
16:10:09	27.7	0.362	0.349	0.351	0.328	0.326	0.339	0.334			0.241571	0.228571	0.230571	0.207571	0.205571	0.218571	0.213571	0.220857	0.0050034
16:15:09	27.7	0.365	0.355	0.358	0.33	0.329	0.341	0.339			0.244857	0.234857	0.237857	0.209857	0.208857	0.220857	0.218857	0.225143	0.00534841
16:20:09	27.7	0.367	0.354	0.356	0.326	0.33	0.341	0.338			0.246714	0.233714	0.235714	0.205714	0.209714	0.220714	0.217714	0.224286	0.00563939
16:25:09	27.7	0.362	0.349	0.352	0.324	0.329	0.339	0.338			0.241429	0.228429	0.231429	0.203429	0.208429	0.218429	0.217429	0.221286	0.00503998
16:30:09	27.7	0.362	0.353	0.356	0.326	0.331	0.343	0.34			0.241429	0.232429	0.235429	0.205429	0.210429	0.222429	0.219429	0.223857	0.00501833
16:35:09	27.7	0.361	0.35	0.353	0.324	0.331	0.341	0.339			0.24	0.229	0.232	0.203	0.21	0.22	0.218	0.221714	0.00487322
16:40:09	27.7	0.364	0.353	0.357	0.327	0.333	0.344	0.341			0.243571	0.232571	0.236571	0.206571	0.212571	0.223571	0.220571	0.225143	0.00500408
16:45:09	27.7	0.366	0.358	0.36	0.329	0.335	0.349	0.344			0.245286	0.237286	0.239286	0.208286	0.214286	0.228286	0.223286	0.228	0.00514418
16:50:09	27.7	0.367	0.358	0.365	0.334	0.342	0.351	0.347			0.246429	0.237429	0.244429	0.213429	0.221429	0.230429	0.226429	0.231429	0.00457738
16:55:09	27.7	0.362	0.351	0.358	0.33	0.338	0.345	0.343			0.241429	0.230429	0.237429	0.209429	0.217429	0.224429	0.222429	0.226143	0.00422979
17:00:09	27.6	0.362	0.351	0.357	0.327	0.337	0.343	0.342			0.241429	0.230429	0.236429	0.206429	0.216429	0.222429	0.221429	0.225	0.00454531
17:05:09	27.6	0.367	0.355	0.36	0.329	0.337	0.346	0.343			0.246143	0.234143	0.239143	0.208143	0.216143	0.225143	0.222143	0.227286	0.00503525
17:10:09	27.6	0.369	0.36	0.366	0.332	0.34	0.353	0.349			0.248429	0.239429	0.245429	0.211429	0.219429	0.232429	0.228429	0.232143	0.00511633
17:15:09	27.7	0.368	0.355	0.364	0.331	0.341	0.349	0.345			0.247714	0.234714	0.243714	0.210714	0.220714	0.228714	0.224714	0.230143	0.004908
17:20:09	27.6	0.364	0.353	0.361	0.331	0.34	0.349	0.346			0.243714	0.232714	0.240714	0.210714	0.219714	0.228714	0.225714	0.228857	0.00436124
17:25:09	27.6	0.365	0.353	0.362	0.33	0.341	0.351	0.348			0.244286	0.232286	0.241286	0.209286	0.220286	0.230286	0.227286	0.229286	0.00453557
17:30:09	27.7	0.368	0.353	0.364	0.334	0.341	0.352	0.348			0.247143	0.232143	0.243143	0.213143	0.220143	0.231143	0.227143	0.230571	0.00452431
17:35:09	27.6	0.372	0.359	0.367	0.335	0.346	0.355	0.352			0.250714	0.237714	0.245714	0.213714	0.224714	0.233714	0.230714	0.233857	0.00472797
17:40:09	27.6	0.37	0.357	0.365	0.336	0.347	0.353	0.35			0.248429	0.235429	0.243429	0.214429	0.225429	0.231429	0.228429	0.232429	0.00429839
17:45:09	27.7	0.367	0.357	0.363	0.334	0.345	0.353	0.349			0.245429	0.235429	0.241429	0.212429	0.223429	0.231429	0.227429	0.231	0.0042306
17:50:09	27.7	0.368	0.361	0.368	0.337	0.347	0.357	0.35			0.245857	0.238857	0.245857	0.214857	0.224857	0.234857	0.227857	0.233286	0.00433621
17:55:09	27.6	0.368	0.359	0.365	0.339	0.347	0.357	0.35			0.246	0.237	0.243	0.217	0.225	0.235	0.228	0.233	0.00388526
18:00:09	27.7	0.371	0.352	0.365	0.337	0.345	0.357	0.351			0.248714	0.229714	0.242714	0.214714	0.222714	0.234714	0.228714	0.231714	0.00436981
18:05:09	27.6	0.372	0.351	0.362	0.335	0.343	0.354	0.348			0.250429	0.229429	0.240429	0.213429	0.221429	0.232429	0.226429	0.230571	0.00460553
18:10:09	27.6	0.373	0.354	0.369	0.34	0.347	0.36	0.353			0.251571	0.232571	0.247571	0.218571	0.225571	0.238571	0.231571	0.235143	0.00442319
18:15:09	27.6	0.369	0.35	0.364	0.338	0.345	0.355	0.35			0.247571	0.228571	0.242571	0.216571	0.223571	0.233571	0.228571	0.231571	0.00404734
18:20:09	27.6	0.368	0.351	0.363	0.336	0.345	0.355	0.351			0.246143	0.229143	0.241143	0.214143	0.223143	0.233143	0.229143	0.230857	0.00405154
18:25:09	27.6	0.368	0.347	0.359	0.334	0.341	0.35	0.345			0.246286	0.225286	0.237286	0.212286	0.219286	0.228286	0.223286	0.227429	0.00428413
18:30:09	27.6	0.371	0.348	0.362	0.332	0.342	0.355	0.35			0.249	0.226	0.24	0.21	0.22	0.233	0.228	0.229429	0.00484943
18:35:09	27.6	0.371	0.352	0.366	0.339	0.344	0.359	0.353			0.249143	0.230143	0.244143	0.217143	0.222143	0.237143	0.231143	0.233	0.00431734
18:40:09	27.7	0.371	0.358	0.37	0.346	0.349	0.359	0.355			0.249286	0.236286	0.248286	0.224286	0.227286	0.237286	0.233286	0.236571	0.00361027
18:45:09	27.7	0.373	0.356	0.372	0.344	0.351	0.362	0.359			0.251143	0.234143	0.250143	0.222143	0.229143	0.240143	0.237143	0.237714	0.00399319
18:50:09	27.6	0.373	0.356	0.371	0.346	0.351	0.364	0.36			0.250857	0.233857	0.248857	0.223857	0.228857	0.241857	0.237857	0.238	0.00377604
18:55:09	27.7	0.372	0.354	0.37	0.343	0.35	0.361	0.358			0.250714	0.232714	0.248714	0.221714	0.228714	0.239714	0.236714	0.237	0.00394434
19:00:09	27.6	0.372	0.35	0.366	0.342	0.348	0.358	0.357			0.250714	0.228714	0.244714	0.220714	0.226714	0.236714	0.235714	0.234857	0.00395468
19:05:09	27.6	0.374	0.353	0.368	0.341	0.347	0.359	0.357			0.252429	0.231429	0.246429	0.219429	0.225429	0.237429	0.235429	0.235429	0.004326
19:10:09	27.6	0.375	0.353	0.372	0.346	0.349	0.365	0.361			0.253429	0.231429	0.250429	0.224429	0.227429	0.243429	0.239429	0.238571	0.00425625
19:15:09	27.6	0.375	0.35	0.37	0.346	0.349	0.364	0.361			0.253429	0.228429	0.248429	0.224429	0.227429	0.242429	0.239429	0.237714	0.00424104
19:20:09	27.6	0.376	0.349	0.365	0.343	0.347	0.361	0.36			0.254	0.227	0.243	0.221	0.225	0.239	0.238	0.235286	0.00439
19:25:09	27.6	0.377	0.349	0.369	0.344	0.349	0.364	0.362			0.255286	0.227286	0.247286	0.222286	0.227286	0.242286	0.240286	0.237429	0.0045848
19:30:09	27.6	0.379	0.354	0.372	0.35	0.35	0.366	0.365			0.257143	0.232143	0.250143	0.228143	0.228143	0.244143	0.243143	0.240429	0.00426902
19:35:09	27.6	0.38	0.351	0.368	0.343	0.347	0.361	0.36			0.257857	0.228857	0.245857	0.220857	0.224857	0.238857	0.237857	0.236429	0.00485434
19:40:09	27.6	0.382	0.351	0.369	0.342	0.347	0.36	0.36			0.259429	0.228429	0.246429	0.219429	0.224429	0.237429	0.237429	0.236143	0.00518107
19:45:09	27.6	0.383	0.352	0.373	0.345	0.349	0.364	0.36			0.260571	0.229571	0.250571	0.222571	0.226571	0.241571	0.237571	0.238429	0.00516134
19:50:09	27.6	0.383	0.355	0.378	0.353	0.358	0.366	0.366			0.260286	0.232286	0.255286	0.230286	0.235286	0.243286	0.243286	0.242857	0.00432521
19:55:09	27.6	0.384	0.35	0.374	0.349	0.354	0.363	0.363			0.261	0.227	0.251	0.226	0.231	0.24	0.24	0.239429	0.00489342
20:00:09	27.7	0.384	0.347	0.37	0.344	0.351	0.359	0.359			0.261	0.224	0.247	0.221	0.228	0.236	0.236	0.236143	0.00529793
20:05:09	27.6	0.386	0.345	0.37	0.342	0.349	0.358	0.36			0.262571	0.221571	0.246571	0.218571	0.225571	0.234571	0.236571	0.235143	0.00584668
20:10:09	27.6	0.385	0.347	0.37	0.344	0.348	0.359	0.359			0.261857	0.223857	0.246857	0.220857	0.224857	0.235857	0.235857	0.235714	0.00553529
20:15:09	27.6	0.386	0.35	0.375	0.346	0.351	0.363	0.363			0.262857	0.226857	0.251857	0.222857	0.227857	0.239857	0.239857	0.238857	0.00549459
20:20:09	27.6	0.388	0.351	0.375	0.35	0.353	0.365	0.366			0.264714	0.227714	0.251714	0.226714	0.229714	0.241714	0.242714	0.240714	0.00531843
20:25:09	27.6	0.389	0.351	0.375	0.348	0.353	0.364	0.364			0.265714	0.227714	0.251714	0.224714	0.229714	0.240714	0.240714	0.240143	0.00554143
20:30:09	27.6	0.39	0.344	0.37	0.342	0.349	0.36	0.361			0.266286	0.220286	0.246286	0.218286	0.225286	0.236286	0.237286	0.235714	0.00636156
20:35:09	27.6	0.39	0.344	0.372	0.339	0.351	0.359	0.361			0.266286	0.220286	0.248286	0.215286	0.227286	0.235286	0.237286	0.235714	0.00658591
20:40:09	27.7	0.39	0.353	0.377	0.347	0.354	0.364	0.366			0.266	0.229	0.253	0.223	0.23	0.24	0.242	0.240429	0.00568564
20:45:09	27.6	0.391	0.351	0.376	0.349	0.354	0.364	0.363			0.267143	0.227143	0.252143	0.225143	0.230143	0.240143	0.239143	0.240143	0.00570714
20:50:09	27.6	0.39	0.35	0.378	0.348	0.356	0.368	0.367			0.266143	0.226143	0.254143	0.224143	0.232143	0.244143	0.243143	0.241429	0.00577645
20:55:09	27.6	0.392	0.353	0.379	0.351	0.357	0.367	0.367			0.268	0.229	0.255	0.227	0.233	0.243	0.243	0.242571	0.00560551
21:00:09	27.6	0.389	0.346	0.376	0.345	0.354	0.365	0.366			0.264714	0.221714	0.251714	0.220714	0.229714	0.240714	0.241714	0.238714	0.00607885
21:05:09	27.6	0.388	0.345	0.376	0.343	0.353	0.365	0.364			0.264143	0.221143	0.252143	0.219143	0.229143	0.241143	0.240143	0.238143	0.00620292
21:10:09	27.6	0.389	0.348	0.379	0.345	0.355	0.367	0.367			0.265	0.224	0.255	0.221	0.231	0.243	0.243	0.240286	0.00610509
21:15:09	27.6	0.391	0.349	0.381	0.349	0.357	0.37	0.369			0.266857	0.224857	0.256857	0.224857	0.232857	0.245857	0.244857	0.242429	0.00603899
21:20:09	27.6	0.391	0.342	0.377	0.344	0.353	0.364	0.36			0.267143	0.218143	0.253143	0.220143	0.229143	0.240143	0.236143	0.237714	0.00668637
21:25:09	27.6	0.393	0.344	0.379	0.347	0.356	0.366	0.363			0.268857	0.219857	0.254857	0.222857	0.231857	0.241857	0.238857	0.239857	0.00659004
21:30:09	27.6	0.389	0.349	0.382	0.349	0.356	0.368	0.362			0.264714	0.224714	0.257714	0.224714	0.231714	0.243714	0.237714	0.240714	0.00592814
21:35:09	27.6	0.388	0.347	0.38	0.348	0.357	0.37	0.365			0.264143	0.223143	0.256143	0.224143	0.233143	0.246143	0.241143	0.241143	0.00588784
21:40:09	27.6	0.388	0.348	0.382	0.348	0.357	0.371	0.365			0.265	0.225	0.259	0.225	0.234	0.248	0.242	0.242571	0.00596361
21:45:09	27.6	0.387	0.346	0.378	0.345	0.356	0.367	0.36			0.264	0.223	0.255	0.222	0.233	0.244	0.237	0.239714	0.00595105
21:50:09	27.6	0.389	0.345	0.38	0.346	0.358	0.37	0.365			0.265714	0.221714	0.256714	0.222714	0.234714	0.246714	0.241714	0.241429	0.00624009
21:55:09	27.6	0.389	0.346	0.379	0.345	0.352	0.369	0.362			0.265429	0.222429	0.255429	0.221429	0.228429	0.245429	0.238429	0.239571	0.00636743
22:00:09	27.6	0.39	0.348	0.381	0.348	0.344	0.372	0.364			0.266571	0.224571	0.257571	0.224571	0.220571	0.248571	0.240571	0.240429	0.00679786
22:05:09	27.6	0.39	0.348	0.381	0.35	0.346	0.372	0.366			0.266429	0.224429	0.257429	0.226429	0.222429	0.248429	0.242429	0.241143	0.0065564
22:10:09	27.6	0.391	0.348	0.38	0.347	0.343	0.371	0.364			0.267143	0.224143	0.256143	0.223143	0.219143	0.247143	0.240143	0.239571	0.00693115
22:15:09	27.6	0.391	0.345	0.38	0.346	0.343	0.371	0.364			0.267286	0.221286	0.256286	0.222286	0.219286	0.247286	0.240286	0.239143	0.00715618
22:20:09	27.6	0.392	0.346	0.379	0.348	0.343	0.372	0.363			0.268	0.222	0.255	0.224	0.219	0.248	0.239	0.239286	0.00705662
22:25:09	27.6	0.391	0.345	0.38	0.348	0.343	0.367	0.363			0.267	0.221	0.256	0.224	0.219	0.243	0.239	0.238429	0.006962
22:30:09	27.6	0.392	0.347	0.381	0.347	0.344	0.367	0.363			0.268429	0.223429	0.257429	0.223429	0.220429	0.243429	0.239429	0.239429	0.00699319
22:35:09	27.6	0.393	0.345	0.38	0.349	0.344	0.366	0.363			0.269	0.221	0.256	0.225	0.22	0.242	0.239	0.238857	0.00703538
22:40:09	27.6	0.391	0.347	0.382	0.35	0.345	0.371	0.367			0.266714	0.222714	0.257714	0.225714	0.220714	0.246714	0.242714	0.240429	0.00681984
22:45:09	27.6	0.393	0.349	0.384	0.358	0.348	0.376	0.371			0.269143	0.225143	0.260143	0.234143	0.224143	0.252143	0.247143	0.244571	0.00657143
22:50:09	27.6	0.395	0.348	0.384	0.355	0.349	0.373	0.37			0.271143	0.224143	0.260143	0.231143	0.225143	0.249143	0.246143	0.243857	0.00680236
22:55:09	27.6	0.393	0.349	0.384	0.353	0.348	0.373	0.37			0.268857	0.224857	0.259857	0.228857	0.223857	0.248857	0.245857	0.243	0.00670972
23:00:09	27.6	0.391	0.346	0.383	0.352	0.347	0.372	0.368			0.266714	0.221714	0.258714	0.227714	0.222714	0.247714	0.243714	0.241286	0.0067431
23:05:09	27.6	0.393	0.349	0.385	0.355	0.35	0.374	0.37			0.268857	0.224857	0.260857	0.230857	0.225857	0.249857	0.245857	0.243857	0.00656107
23:10:09	27.6	0.395	0.353	0.389	0.358	0.354	0.377	0.373			0.270429	0.228429	0.264429	0.233429	0.229429	0.252429	0.248429	0.246714	0.00640206
23:15:09	27.6	0.396	0.353	0.386	0.357	0.352	0.375	0.369			0.271571	0.228571	0.261571	0.232571	0.227571	0.250571	0.244571	0.245286	0.00643545
23:20:09	27.6	0.396	0.347	0.377	0.348	0.345	0.367	0.362			0.271286	0.222286	0.252286	0.223286	0.220286	0.242286	0.237286	0.238429	0.0070826
23:25:09	27.6	0.398	0.353	0.385	0.35	0.347	0.372	0.364			0.273143	0.228143	0.260143	0.225143	0.222143	0.247143	0.239143	0.242143	0.00724405
23:30:09	27.6	0.397	0.355	0.388	0.355	0.35	0.374	0.364			0.272857	0.230857	0.263857	0.230857	0.225857	0.249857	0.239857	0.244857	0.00681036
23:35:09	27.6	0.398	0.355	0.385	0.354	0.348	0.372	0.366			0.273714	0.230714	0.260714	0.229714	0.223714	0.247714	0.241714	0.244	0.00685466
23:40:09	27.6	0.399	0.355	0.387	0.354	0.351	0.373	0.368			0.274571	0.230571	0.262571	0.229571	0.226571	0.248571	0.243571	0.245143	0.0068725
23:45:09	27.6	0.397	0.356	0.386	0.357	0.351	0.374	0.362			0.272286	0.231286	0.261286	0.232286	0.226286	0.249286	0.237286	0.244286	0.00651738
23:50:09	27.6	0.399	0.357	0.387	0.359	0.35	0.375	0.364			0.274429	0.232429	0.262429	0.234429	0.225429	0.250429	0.239429	0.245571	0.00669196
23:55:09	27.6	0.398	0.354	0.385	0.355	0.348	0.374	0.362			0.273143	0.229143	0.260143	0.230143	0.223143	0.249143	0.237143	0.243143	0.00694537
1 day, 0:00:09	27.6	0.398	0.354	0.387	0.357	0.349	0.373	0.363			0.273	0.229	0.262	0.232	0.224	0.248	0.238	0.243714	0.00687547
1 day, 0:05:09	27.6	0.399	0.352	0.385	0.354	0.347	0.37	0.36			0.273714	0.226714	0.259714	0.228714	0.221714	0.244714	0.234714	0.241429	0.00723653
1 day, 0:10:09	27.6	0.401	0.355	0.388	0.355	0.348	0.374	0.363			0.275286	0.229286	0.262286	0.229286	0.222286	0.248286	0.237286	0.243429	0.00736604
1 day, 0:15:09	27.6	0.402	0.361	0.391	0.362	0.353	0.379	0.366			0.276286	0.235286	0.265286	0.236286	0.227286	0.253286	0.240286	0.247714	0.00675016
1 day, 0:20:09	27.6	0.403	0.359	0.389	0.358	0.351	0.376	0.362			0.276857	0.232857	0.262857	0.231857	0.224857	0.249857	0.235857	0.245	0.00718275
1 day, 0:25:09	27.6	0.403	0.357	0.388	0.358	0.35	0.376	0.364			0.276714	0.230714	0.261714	0.231714	0.223714	0.249714	0.237714	0.244571	0.00722571
1 day, 0:30:09	27.6	0.402	0.358	0.39	0.361	0.351	0.379	0.367			0.275571	0.231571	0.263571	0.234571	0.224571	0.252571	0.240571	0.246143	0.00699271
1 day, 0:35:09	27.6	0.4	0.358	0.388	0.364	0.352	0.38	0.368			0.273714	0.231714	0.261714	0.237714	0.225714	0.253714	0.241714	0.246571	0.00650065
1 day, 0:40:09	27.6	0.4	0.354	0.385	0.36	0.35	0.378	0.365			0.274143	0.228143	0.259143	0.234143	0.224143	0.252143	0.239143	0.244429	0.00684771
1 day, 0:45:09	27.6	0.402	0.356	0.389	0.362	0.351	0.381	0.367			0.275143	0.229143	0.262143	0.235143	0.224143	0.254143	0.240143	0.245714	0.00705373
1 day, 0:50:09	27.6	0.403	0.356	0.391	0.362	0.352	0.382	0.368			0.276857	0.229857	0.264857	0.235857	0.225857	0.255857	0.241857	0.247286	0.00720402
1 day, 0:55:09	27.6	0.406	0.356	0.388	0.358	0.35	0.379	0.365			0.279	0.229	0.261	0.231	0.223	0.252	0.238	0.244714	0.0076305
1 day, 1:00:09	27.7	0.406	0.355	0.389	0.357	0.35	0.379	0.365			0.278714	0.227714	0.261714	0.229714	0.222714	0.251714	0.237714	0.244286	0.00777621

## Sheet: M9_delserCGA-1
Time	T° 600	C2	C4	C6	E3	E5	G2	G4		raw data - medium control mean	C2	C4	C6	E3	E5	G2	G4	Mean	Se
00:00:09	27.1	0.106	0.117	0.114	0.109	0.111	0.117	0.122			-0.00157143	0.00942857	0.00642857	0.00142857	0.00342857	0.00942857	0.0144286	0.00614286	0.00206691
00:05:09	27.2	0.106	0.117	0.114	0.109	0.111	0.116	0.123			-0.00128571	0.00971429	0.00671429	0.00171429	0.00371429	0.00871429	0.0157143	0.00642857	0.00213491
00:10:09	27.2	0.106	0.117	0.113	0.109	0.112	0.114	0.123			-0.00157143	0.00942857	0.00542857	0.00142857	0.00442857	0.00642857	0.0154286	0.00585714	0.00208003
00:15:09	27.3	0.105	0.118	0.113	0.11	0.111	0.114	0.122			-0.00228571	0.0107143	0.00571429	0.00271429	0.00371429	0.00671429	0.0147143	0.006	0.00208982
00:20:09	27.3	0.105	0.118	0.113	0.109	0.111	0.114	0.123			-0.00228571	0.0107143	0.00571429	0.00171429	0.00371429	0.00671429	0.0157143	0.006	0.00223302
00:25:09	27.3	0.106	0.118	0.114	0.109	0.111	0.114	0.121			-0.00128571	0.0107143	0.00671429	0.00171429	0.00371429	0.00671429	0.0137143	0.006	0.00194831
00:30:09	27.3	0.105	0.117	0.113	0.109	0.111	0.116	0.121			-0.00228571	0.00971429	0.00571429	0.00171429	0.00371429	0.00871429	0.0137143	0.00585714	0.00202871
00:35:09	27.4	0.105	0.117	0.112	0.109	0.111	0.115	0.121			-0.00185714	0.0101429	0.00514286	0.00214286	0.00414286	0.00814286	0.0141429	0.006	0.0020051
00:40:09	27.4	0.106	0.117	0.114	0.109	0.111	0.115	0.121			-0.00128571	0.00971429	0.00671429	0.00171429	0.00371429	0.00771429	0.0137143	0.006	0.0019113
00:45:09	27.4	0.109	0.116	0.113	0.109	0.111	0.115	0.122			0.00214286	0.00914286	0.00614286	0.00214286	0.00414286	0.00814286	0.0151429	0.00671429	0.00174379
00:50:09	27.5	0.105	0.116	0.115	0.109	0.112	0.115	0.121			-0.00214286	0.00885714	0.00785714	0.00185714	0.00485714	0.00785714	0.0138571	0.00614286	0.00196049
00:55:09	27.5	0.105	0.116	0.115	0.11	0.111	0.114	0.12			-0.002	0.009	0.008	0.003	0.004	0.007	0.013	0.006	0.00182574
01:00:09	27.5	0.105	0.115	0.112	0.109	0.112	0.116	0.122			-0.002	0.008	0.005	0.002	0.005	0.009	0.015	0.006	0.00204707
01:05:09	27.5	0.105	0.116	0.114	0.11	0.112	0.116	0.121			-0.00257143	0.00842857	0.00642857	0.00242857	0.00442857	0.00842857	0.0134286	0.00585714	0.00192548
01:10:09	27.5	0.106	0.115	0.114	0.111	0.114	0.117	0.123			-0.00314286	0.00585714	0.00485714	0.00185714	0.00485714	0.00785714	0.0138571	0.00514286	0.0019726
01:15:09	27.5	0.106	0.116	0.116	0.113	0.115	0.119	0.125			-0.005	0.005	0.005	0.002	0.004	0.008	0.014	0.00471429	0.00217906
01:20:09	27.5	0.106	0.118	0.12	0.114	0.117	0.121	0.127			-0.00671429	0.00528571	0.00728571	0.00128571	0.00428571	0.00828571	0.0142857	0.00485714	0.00245781
01:25:09	27.5	0.107	0.12	0.121	0.117	0.12	0.124	0.13			-0.00785714	0.00514286	0.00614286	0.00214286	0.00514286	0.00914286	0.0151429	0.005	0.00264961
01:30:09	27.5	0.107	0.121	0.124	0.119	0.123	0.126	0.129			-0.0104286	0.00357143	0.00657143	0.00157143	0.00557143	0.00857143	0.0115714	0.00385714	0.00267897
01:35:09	27.5	0.108	0.124	0.127	0.121	0.125	0.128	0.133			-0.0118571	0.00414286	0.00714286	0.00114286	0.00514286	0.00814286	0.0131429	0.00385714	0.00297381
01:40:09	27.5	0.11	0.126	0.128	0.124	0.128	0.13	0.138			-0.012	0.004	0.006	0.002	0.006	0.008	0.016	0.00428571	0.00319012
01:45:09	27.5	0.112	0.128	0.131	0.126	0.131	0.132	0.139			-0.0124286	0.00357143	0.00657143	0.00157143	0.00657143	0.00757143	0.0145714	0.004	0.00313853
01:50:09	27.5	0.116	0.13	0.133	0.127	0.132	0.134	0.138			-0.0101429	0.00385714	0.00685714	0.000857143	0.00585714	0.00785714	0.0118571	0.00385714	0.00266369
01:55:09	27.5	0.117	0.132	0.135	0.13	0.135	0.135	0.142			-0.0111429	0.00385714	0.00685714	0.00185714	0.00685714	0.00685714	0.0138571	0.00414286	0.00290905
02:00:09	27.5	0.122	0.134	0.137	0.131	0.137	0.137	0.144			-0.00757143	0.00442857	0.00742857	0.00142857	0.00742857	0.00742857	0.0144286	0.005	0.00257143
02:05:09	27.5	0.12	0.135	0.138	0.133	0.138	0.139	0.144			-0.0108571	0.00414286	0.00714286	0.00214286	0.00714286	0.00814286	0.0131429	0.00442857	0.00285952
02:10:09	27.5	0.122	0.137	0.139	0.134	0.14	0.14	0.145			-0.0101429	0.00485714	0.00685714	0.00185714	0.00785714	0.00785714	0.0128571	0.00457143	0.0027578
02:15:09	27.5	0.123	0.138	0.139	0.135	0.141	0.142	0.148			-0.0104286	0.00457143	0.00557143	0.00157143	0.00757143	0.00857143	0.0145714	0.00457143	0.0029277
02:20:09	27.5	0.123	0.139	0.141	0.136	0.142	0.143	0.149			-0.0115714	0.00442857	0.00642857	0.00142857	0.00742857	0.00842857	0.0144286	0.00442857	0.00306283
02:25:09	27.5	0.125	0.139	0.141	0.137	0.144	0.144	0.151			-0.0104286	0.00357143	0.00557143	0.00157143	0.00857143	0.00857143	0.0155714	0.00471429	0.00304278
02:30:09	27.5	0.126	0.14	0.144	0.138	0.145	0.145	0.148			-0.0104286	0.00357143	0.00757143	0.00157143	0.00857143	0.00857143	0.0115714	0.00442857	0.00278113
02:35:09	27.5	0.126	0.141	0.142	0.139	0.146	0.147	0.151			-0.0115714	0.00342857	0.00442857	0.00142857	0.00842857	0.00942857	0.0134286	0.00414286	0.00303718
02:40:09	27.5	0.127	0.141	0.142	0.139	0.147	0.147	0.154			-0.0111429	0.00285714	0.00385714	0.000857143	0.00885714	0.00885714	0.0158571	0.00428571	0.00319119
02:45:09	27.5	0.126	0.141	0.145	0.14	0.147	0.147	0.153			-0.0124286	0.00257143	0.00657143	0.00157143	0.00857143	0.00857143	0.0145714	0.00428571	0.00322722
02:50:09	27.5	0.127	0.142	0.144	0.14	0.148	0.147	0.154			-0.0115714	0.00342857	0.00542857	0.00142857	0.00942857	0.00842857	0.0154286	0.00457143	0.00319545
02:55:09	27.5	0.128	0.142	0.145	0.14	0.149	0.148	0.153			-0.0107143	0.00328571	0.00628571	0.00128571	0.0102857	0.00928571	0.0142857	0.00485714	0.00307724
03:00:09	27.5	0.127	0.143	0.149	0.141	0.149	0.148	0.155			-0.0114286	0.00457143	0.0105714	0.00257143	0.0105714	0.00957143	0.0165714	0.00614286	0.00339367
03:05:09	27.5	0.128	0.142	0.145	0.141	0.15	0.149	0.153			-0.0107143	0.00328571	0.00628571	0.00228571	0.0112857	0.0102857	0.0142857	0.00528571	0.00313202
03:10:09	27.5	0.129	0.142	0.147	0.141	0.151	0.149	0.154			-0.00942857	0.00357143	0.00857143	0.00257143	0.0125714	0.0105714	0.0155714	0.00628571	0.00315258
03:15:09	27.5	0.129	0.142	0.145	0.141	0.151	0.15	0.155			-0.00957143	0.00342857	0.00642857	0.00242857	0.0124286	0.0114286	0.0164286	0.00614286	0.00324194
03:20:09	27.6	0.13	0.142	0.146	0.141	0.151	0.15	0.154			-0.00814286	0.00385714	0.00785714	0.00285714	0.0128571	0.0118571	0.0158571	0.00671429	0.00305839
03:25:09	27.6	0.131	0.142	0.145	0.141	0.151	0.149	0.155			-0.00685714	0.00414286	0.00714286	0.00314286	0.0131429	0.0111429	0.0171429	0.007	0.00297952
03:30:09	27.6	0.131	0.142	0.145	0.141	0.15	0.149	0.155			-0.00642857	0.00457143	0.00757143	0.00357143	0.0125714	0.0115714	0.0175714	0.00728571	0.0029335
03:35:09	27.6	0.133	0.142	0.145	0.141	0.15	0.149	0.152			-0.00414286	0.00485714	0.00785714	0.00385714	0.0128571	0.0118571	0.0148571	0.00742857	0.00247711
03:40:09	27.6	0.131	0.143	0.146	0.141	0.15	0.15	0.152			-0.00614286	0.00585714	0.00885714	0.00385714	0.0128571	0.0128571	0.0148571	0.00757143	0.00274048
03:45:09	27.6	0.13	0.143	0.144	0.14	0.15	0.15	0.152			-0.00642857	0.00657143	0.00757143	0.00357143	0.0135714	0.0135714	0.0155714	0.00771429	0.00288203
03:50:09	27.6	0.131	0.142	0.144	0.141	0.15	0.149	0.155			-0.00471429	0.00628571	0.00828571	0.00528571	0.0142857	0.0132857	0.0192857	0.00885714	0.00293466
03:55:09	27.6	0.131	0.143	0.144	0.14	0.151	0.148	0.155			-0.00528571	0.00671429	0.00771429	0.00371429	0.0147143	0.0117143	0.0187143	0.00828571	0.00296694
04:00:09	27.6	0.131	0.143	0.146	0.14	0.149	0.148	0.157			-0.00514286	0.00685714	0.00985714	0.00385714	0.0128571	0.0118571	0.0208571	0.00871429	0.00306616
04:05:09	27.6	0.132	0.144	0.145	0.141	0.149	0.148	0.155			-0.00442857	0.00757143	0.00857143	0.00457143	0.0125714	0.0115714	0.0185714	0.00842857	0.00272054
04:10:09	27.6	0.133	0.143	0.145	0.139	0.147	0.147	0.155			-0.00285714	0.00714286	0.00914286	0.00314286	0.0111429	0.0111429	0.0191429	0.00828571	0.00261341
04:15:09	27.6	0.133	0.142	0.145	0.138	0.146	0.148	0.154			-0.00257143	0.00642857	0.00942857	0.00242857	0.0104286	0.0124286	0.0184286	0.00814286	0.00258857
04:20:09	27.6	0.134	0.144	0.145	0.137	0.147	0.149	0.155			-0.00114286	0.00885714	0.00985714	0.00185714	0.0118571	0.0138571	0.0198571	0.00928571	0.00268911
04:25:09	27.6	0.135	0.143	0.145	0.136	0.146	0.149	0.151			0.000285714	0.00828571	0.0102857	0.00128571	0.0112857	0.0142857	0.0162857	0.00885714	0.00230793
04:30:09	27.6	0.137	0.143	0.144	0.137	0.147	0.149	0.153			0.00257143	0.00857143	0.00957143	0.00257143	0.0125714	0.0145714	0.0185714	0.00985714	0.00225425
04:35:09	27.6	0.133	0.143	0.145	0.138	0.147	0.148	0.154			-0.00128571	0.00871429	0.0107143	0.00371429	0.0127143	0.0137143	0.0197143	0.00971429	0.00260037
04:40:09	27.6	0.133	0.142	0.148	0.138	0.147	0.148	0.151			-0.000142857	0.00885714	0.0148571	0.00485714	0.0138571	0.0148571	0.0178571	0.0107143	0.00244393
04:45:09	27.6	0.133	0.143	0.144	0.138	0.147	0.149	0.15			0	0.01	0.011	0.005	0.014	0.016	0.017	0.0104286	0.00231822
04:50:09	27.6	0.133	0.142	0.143	0.138	0.146	0.15	0.151			-0.000142857	0.00885714	0.00985714	0.00485714	0.0128571	0.0168571	0.0178571	0.0101429	0.00242717
04:55:09	27.6	0.134	0.142	0.144	0.137	0.146	0.149	0.153			0.000857143	0.00885714	0.0108571	0.00385714	0.0128571	0.0158571	0.0198571	0.0104286	0.00249626
05:00:09	27.6	0.134	0.143	0.143	0.138	0.146	0.151	0.15			0.00114286	0.0101429	0.0101429	0.00514286	0.0131429	0.0181429	0.0171429	0.0107143	0.00231822
05:05:09	27.6	0.135	0.143	0.144	0.137	0.147	0.149	0.148			0.00242857	0.0104286	0.0114286	0.00442857	0.0144286	0.0164286	0.0154286	0.0107143	0.00205536
05:10:09	27.6	0.135	0.143	0.146	0.137	0.147	0.149	0.15			0.003	0.011	0.014	0.005	0.015	0.017	0.018	0.0118571	0.00220852
05:15:09	27.6	0.137	0.143	0.145	0.137	0.147	0.15	0.151			0.00542857	0.0114286	0.0134286	0.00542857	0.0154286	0.0184286	0.0194286	0.0127143	0.00214603
05:20:09	27.6	0.137	0.143	0.146	0.137	0.147	0.15	0.15			0.006	0.012	0.015	0.006	0.016	0.019	0.019	0.0132857	0.00208982
05:25:09	27.6	0.137	0.144	0.146	0.137	0.148	0.148	0.149			0.00628571	0.0132857	0.0152857	0.00628571	0.0172857	0.0172857	0.0182857	0.0134286	0.00194482
05:30:09	27.6	0.138	0.143	0.146	0.137	0.148	0.148	0.148			0.00842857	0.0134286	0.0164286	0.00742857	0.0184286	0.0184286	0.0184286	0.0144286	0.00181265
05:35:09	27.6	0.138	0.142	0.146	0.137	0.149	0.147	0.148			0.00857143	0.0125714	0.0165714	0.00757143	0.0195714	0.0175714	0.0185714	0.0144286	0.00184428
05:40:09	27.6	0.138	0.143	0.146	0.138	0.15	0.15	0.149			0.00871429	0.0137143	0.0167143	0.00871429	0.0207143	0.0207143	0.0197143	0.0155714	0.0020051
05:45:09	27.6	0.139	0.143	0.146	0.138	0.15	0.148	0.15			0.0101429	0.0141429	0.0171429	0.00914286	0.0211429	0.0191429	0.0211429	0.016	0.00188261
05:50:09	27.6	0.14	0.143	0.146	0.138	0.15	0.15	0.15			0.0112857	0.0142857	0.0172857	0.00928571	0.0212857	0.0212857	0.0212857	0.0165714	0.0019113
05:55:09	27.6	0.14	0.143	0.147	0.139	0.149	0.151	0.147			0.0121429	0.0151429	0.0191429	0.0111429	0.0211429	0.0231429	0.0191429	0.0172857	0.00172418
06:00:09	27.6	0.14	0.143	0.148	0.137	0.148	0.152	0.147			0.0124286	0.0154286	0.0204286	0.00942857	0.0204286	0.0244286	0.0194286	0.0174286	0.00197605
06:05:09	27.6	0.141	0.142	0.147	0.138	0.148	0.151	0.146			0.0138571	0.0148571	0.0198571	0.0108571	0.0208571	0.0238571	0.0188571	0.0175714	0.00171429
06:10:09	27.6	0.141	0.143	0.147	0.139	0.149	0.152	0.147			0.014	0.016	0.02	0.012	0.022	0.025	0.02	0.0184286	0.00174379
06:15:09	27.6	0.141	0.144	0.149	0.141	0.149	0.152	0.146			0.0145714	0.0175714	0.0225714	0.0145714	0.0225714	0.0255714	0.0195714	0.0195714	0.00160357
06:20:09	27.6	0.143	0.145	0.149	0.139	0.149	0.152	0.147			0.0164286	0.0184286	0.0224286	0.0124286	0.0224286	0.0254286	0.0204286	0.0197143	0.00164337
06:25:09	27.6	0.144	0.146	0.149	0.14	0.15	0.154	0.148			0.0178571	0.0198571	0.0228571	0.0138571	0.0238571	0.0278571	0.0218571	0.0211429	0.00170034
06:30:08	27.6	0.144	0.146	0.15	0.14	0.15	0.156	0.149			0.0181429	0.0201429	0.0241429	0.0141429	0.0241429	0.0301429	0.0231429	0.022	0.00193254
06:35:09	27.6	0.145	0.147	0.15	0.14	0.15	0.156	0.15			0.0195714	0.0215714	0.0245714	0.0145714	0.0245714	0.0305714	0.0245714	0.0228571	0.00188622
06:40:09	27.6	0.145	0.148	0.151	0.14	0.151	0.156	0.151			0.0207143	0.0237143	0.0267143	0.0157143	0.0267143	0.0317143	0.0267143	0.0245714	0.00194482
06:45:09	27.6	0.145	0.148	0.151	0.141	0.151	0.156	0.15			0.021	0.024	0.027	0.017	0.027	0.032	0.026	0.0248571	0.00181827
06:50:09	27.6	0.145	0.148	0.15	0.142	0.151	0.163	0.15			0.021	0.024	0.026	0.018	0.027	0.039	0.026	0.0258571	0.0025017
06:55:09	27.6	0.146	0.15	0.15	0.142	0.151	0.156	0.153			0.0225714	0.0265714	0.0265714	0.0185714	0.0275714	0.0325714	0.0295714	0.0262857	0.00172812
07:00:09	27.6	0.147	0.151	0.148	0.143	0.153	0.155	0.155			0.0235714	0.0275714	0.0245714	0.0195714	0.0295714	0.0315714	0.0315714	0.0268571	0.00170034
07:05:09	27.6	0.147	0.151	0.149	0.144	0.154	0.156	0.153			0.0235714	0.0275714	0.0255714	0.0205714	0.0305714	0.0325714	0.0295714	0.0271429	0.00158651
07:10:09	27.6	0.147	0.151	0.149	0.144	0.154	0.156	0.155			0.0237143	0.0277143	0.0257143	0.0207143	0.0307143	0.0327143	0.0317143	0.0275714	0.00168224
07:15:09	27.6	0.147	0.152	0.15	0.145	0.155	0.156	0.157			0.0238571	0.0288571	0.0268571	0.0218571	0.0318571	0.0328571	0.0338571	0.0285714	0.00174184
07:20:09	27.6	0.147	0.152	0.151	0.146	0.155	0.155	0.156			0.0231429	0.0281429	0.0271429	0.0221429	0.0311429	0.0311429	0.0321429	0.0278571	0.00150735
07:25:09	27.6	0.147	0.152	0.152	0.147	0.156	0.154	0.156			0.0234286	0.0284286	0.0284286	0.0234286	0.0324286	0.0304286	0.0324286	0.0284286	0.00143095
07:30:09	27.6	0.149	0.152	0.154	0.149	0.157	0.155	0.157			0.0255714	0.0285714	0.0305714	0.0255714	0.0335714	0.0315714	0.0335714	0.0298571	0.00128571
07:35:09	27.6	0.15	0.153	0.155	0.149	0.156	0.155	0.158			0.0267143	0.0297143	0.0317143	0.0257143	0.0327143	0.0317143	0.0347143	0.0304286	0.0012289
07:40:09	27.6	0.152	0.154	0.158	0.15	0.157	0.156	0.156			0.0288571	0.0308571	0.0348571	0.0268571	0.0338571	0.0328571	0.0328571	0.0315714	0.00108484
07:45:09	27.6	0.154	0.154	0.159	0.151	0.156	0.157	0.155			0.0308571	0.0308571	0.0358571	0.0278571	0.0328571	0.0338571	0.0318571	0.032	0.000961858
07:50:09	27.6	0.156	0.155	0.162	0.152	0.155	0.159	0.154			0.033	0.032	0.039	0.029	0.032	0.036	0.031	0.0331429	0.00126168
07:55:09	27.6	0.16	0.156	0.165	0.152	0.154	0.161	0.155			0.0372857	0.0332857	0.0422857	0.0292857	0.0312857	0.0382857	0.0322857	0.0348571	0.00173009
08:00:09	27.6	0.167	0.157	0.171	0.151	0.152	0.162	0.155			0.0447143	0.0347143	0.0487143	0.0287143	0.0297143	0.0397143	0.0327143	0.037	0.00288439
08:05:09	27.6	0.19	0.159	0.195	0.151	0.153	0.166	0.155			0.0677143	0.0367143	0.0727143	0.0287143	0.0307143	0.0437143	0.0327143	0.0447143	0.00685565
08:10:09	27.6	0.216	0.16	0.247	0.151	0.153	0.17	0.153			0.0938571	0.0378571	0.124857	0.0288571	0.0308571	0.0478571	0.0308571	0.0564286	0.0142843
08:15:09	27.6	0.248	0.163	0.26	0.15	0.154	0.178	0.156			0.126571	0.0415714	0.138571	0.0285714	0.0325714	0.0565714	0.0345714	0.0655714	0.0176783
08:20:09	27.6	0.268	0.164	0.265	0.15	0.154	0.188	0.158			0.147571	0.0435714	0.144571	0.0295714	0.0335714	0.0675714	0.0375714	0.072	0.0196806
08:25:09	27.6	0.254	0.167	0.256	0.149	0.156	0.224	0.16			0.133714	0.0467143	0.135714	0.0287143	0.0357143	0.103714	0.0397143	0.0748571	0.0180534
08:30:09	27.6	0.279	0.173	0.279	0.15	0.158	0.306	0.164			0.159	0.053	0.159	0.03	0.038	0.186	0.044	0.0955714	0.0259623
08:35:09	27.6	0.268	0.204	0.289	0.152	0.16	0.311	0.169			0.148	0.084	0.169	0.032	0.04	0.191	0.049	0.101857	0.0250727
08:40:09	27.7	0.304	0.27	0.296	0.153	0.163	0.305	0.181			0.183714	0.149714	0.175714	0.0327143	0.0427143	0.184714	0.0607143	0.118571	0.0264246
08:45:09	27.7	0.283	0.261	0.276	0.156	0.167	0.329	0.191			0.162571	0.140571	0.155571	0.0355714	0.0465714	0.208571	0.0705714	0.117143	0.0250008
08:50:09	27.7	0.295	0.295	0.304	0.159	0.179	0.307	0.271			0.174571	0.174571	0.183571	0.0385714	0.0585714	0.186571	0.150571	0.138143	0.023636
08:55:09	27.7	0.321	0.271	0.313	0.167	0.183	0.329	0.306			0.201	0.151	0.193	0.047	0.063	0.209	0.186	0.15	0.0255445
09:00:09	27.7	0.296	0.301	0.31	0.179	0.216	0.341	0.292			0.176	0.181	0.19	0.059	0.096	0.221	0.172	0.156429	0.0216409
09:05:09	27.7	0.285	0.267	0.316	0.217	0.251	0.329	0.312			0.165	0.147	0.196	0.097	0.131	0.209	0.192	0.162429	0.0151844
09:10:09	27.7	0.291	0.319	0.324	0.283	0.282	0.349	0.32			0.171	0.199	0.204	0.163	0.162	0.229	0.2	0.189714	0.00947607
09:15:09	27.7	0.319	0.281	0.334	0.269	0.272	0.347	0.324			0.199286	0.161286	0.214286	0.149286	0.152286	0.227286	0.204286	0.186857	0.0120571
09:20:09	27.7	0.317	0.31	0.312	0.3	0.295	0.336	0.327			0.197	0.19	0.192	0.18	0.175	0.216	0.207	0.193857	0.00543108
09:25:09	27.7	0.332	0.297	0.349	0.286	0.272	0.37	0.324			0.212286	0.177286	0.229286	0.166286	0.152286	0.250286	0.204286	0.198857	0.0133414
09:30:09	27.7	0.273	0.305	0.313	0.295	0.296	0.331	0.33			0.153	0.185	0.193	0.175	0.176	0.211	0.21	0.186143	0.00780851
09:35:09	27.7	0.342	0.263	0.323	0.269	0.282	0.349	0.33			0.222143	0.143143	0.203143	0.149143	0.162143	0.229143	0.210143	0.188429	0.0135992
09:40:09	27.7	0.288	0.316	0.317	0.303	0.3	0.338	0.326			0.167857	0.195857	0.196857	0.182857	0.179857	0.217857	0.205857	0.192429	0.00638397
09:45:09	27.7	0.334	0.287	0.328	0.308	0.31	0.364	0.33			0.214714	0.167714	0.208714	0.188714	0.190714	0.244714	0.210714	0.203714	0.00921438
09:50:09	27.7	0.288	0.318	0.326	0.305	0.316	0.334	0.332			0.168571	0.198571	0.206571	0.185571	0.196571	0.214571	0.212571	0.197571	0.00613732
09:55:09	27.7	0.381	0.302	0.331	0.299	0.279	0.392	0.302			0.262143	0.183143	0.212143	0.180143	0.160143	0.273143	0.183143	0.207714	0.0165427
10:00:09	27.7	0.336	0.295	0.333	0.305	0.285	0.355	0.29			0.217143	0.176143	0.214143	0.186143	0.166143	0.236143	0.171143	0.195286	0.0102177
10:05:09	27.7	0.331	0.294	0.361	0.315	0.287	0.427	0.299			0.211714	0.174714	0.241714	0.195714	0.167714	0.307714	0.179714	0.211286	0.0187081
10:10:09	27.7	0.36	0.328	0.359	0.318	0.303	0.367	0.307			0.241429	0.209429	0.240429	0.199429	0.184429	0.248429	0.188429	0.216	0.0102
10:15:09	27.7	0.368	0.328	0.396	0.326	0.298	0.391	0.305			0.249429	0.209429	0.277429	0.207429	0.179429	0.272429	0.186429	0.226	0.0152
10:20:09	27.7	0.341	0.35	0.365	0.312	0.291	0.355	0.308			0.222429	0.231429	0.246429	0.193429	0.172429	0.236429	0.189429	0.213143	0.0105553
10:25:09	27.7	0.314	0.323	0.379	0.316	0.282	0.347	0.302			0.195286	0.204286	0.260286	0.197286	0.163286	0.228286	0.183286	0.204571	0.0119158
10:30:09	27.7	0.343	0.321	0.37	0.303	0.316	0.431	0.311			0.224	0.202	0.251	0.184	0.197	0.312	0.192	0.223143	0.0171164
10:35:09	27.7	0.344	0.338	0.388	0.303	0.309	0.352	0.295			0.225571	0.219571	0.269571	0.184571	0.190571	0.233571	0.176571	0.214286	0.0123938
10:40:09	27.7	0.336	0.354	0.37	0.326	0.339	0.345	0.29			0.217571	0.235571	0.251571	0.207571	0.220571	0.226571	0.171571	0.218714	0.00948289
10:45:09	27.7	0.315	0.353	0.353	0.292	0.307	0.38	0.298			0.196429	0.234429	0.234429	0.173429	0.188429	0.261429	0.179429	0.209714	0.0126862
10:50:09	27.7	0.308	0.356	0.354	0.304	0.326	0.349	0.311			0.189286	0.237286	0.235286	0.185286	0.207286	0.230286	0.192286	0.211	0.00865947
10:55:09	27.7	0.317	0.349	0.344	0.372	0.394	0.33	0.329			0.198143	0.230143	0.225143	0.253143	0.275143	0.211143	0.210143	0.229	0.0101827
11:00:09	27.7	0.338	0.338	0.341	0.346	0.385	0.325	0.356			0.219286	0.219286	0.222286	0.227286	0.266286	0.206286	0.237286	0.228286	0.00725062
11:05:09	27.7	0.353	0.325	0.338	0.372	0.369	0.324	0.302			0.234429	0.206429	0.219429	0.253429	0.250429	0.205429	0.183429	0.221857	0.00971218
11:10:09	27.7	0.328	0.319	0.338	0.335	0.353	0.32	0.3			0.209571	0.200571	0.219571	0.216571	0.234571	0.201571	0.181571	0.209143	0.0063653
11:15:09	27.7	0.314	0.324	0.346	0.325	0.34	0.321	0.315			0.196143	0.206143	0.228143	0.207143	0.222143	0.203143	0.197143	0.208571	0.00460257
11:20:09	27.7	0.308	0.326	0.342	0.346	0.345	0.315	0.295			0.190143	0.208143	0.224143	0.228143	0.227143	0.197143	0.177143	0.207429	0.00758982
11:25:09	27.7	0.306	0.325	0.335	0.326	0.312	0.331	0.296			0.188571	0.207571	0.217571	0.208571	0.194571	0.213571	0.178571	0.201286	0.00541477
11:30:09	27.7	0.311	0.324	0.336	0.305	0.318	0.324	0.295			0.193286	0.206286	0.218286	0.187286	0.200286	0.206286	0.177286	0.198429	0.00516134
11:35:09	27.7	0.323	0.326	0.339	0.327	0.304	0.339	0.302			0.205286	0.208286	0.221286	0.209286	0.186286	0.221286	0.184286	0.205143	0.00564602
11:40:09	27.7	0.344	0.327	0.335	0.31	0.309	0.343	0.298			0.226714	0.209714	0.217714	0.192714	0.191714	0.225714	0.180714	0.206429	0.00687893
11:45:09	27.7	0.358	0.327	0.335	0.302	0.299	0.342	0.304			0.240571	0.209571	0.217571	0.184571	0.181571	0.224571	0.186571	0.206429	0.00861734
11:50:09	27.7	0.342	0.328	0.338	0.301	0.307	0.339	0.31			0.224429	0.210429	0.220429	0.183429	0.189429	0.221429	0.192429	0.206	0.00649856
11:55:09	27.7	0.326	0.33	0.336	0.292	0.305	0.335	0.306			0.209143	0.213143	0.219143	0.175143	0.188143	0.218143	0.189143	0.201714	0.00656055
12:00:09	27.7	0.319	0.329	0.333	0.298	0.303	0.337	0.304			0.202	0.212	0.216	0.181	0.186	0.22	0.187	0.200571	0.0060311
12:05:09	27.7	0.316	0.328	0.331	0.298	0.298	0.34	0.305			0.199286	0.211286	0.214286	0.181286	0.181286	0.223286	0.188286	0.199857	0.00638397
12:10:09	27.7	0.317	0.325	0.331	0.3	0.303	0.342	0.307			0.200286	0.208286	0.214286	0.183286	0.186286	0.225286	0.190286	0.201143	0.00590572
12:15:09	27.7	0.328	0.328	0.328	0.296	0.31	0.344	0.31			0.211286	0.211286	0.211286	0.179286	0.193286	0.227286	0.193286	0.203857	0.00605867
12:20:09	27.7	0.343	0.327	0.325	0.295	0.308	0.342	0.309			0.226143	0.210143	0.208143	0.178143	0.191143	0.225143	0.192143	0.204429	0.00684075
12:25:09	27.7	0.359	0.331	0.323	0.302	0.307	0.34	0.309			0.241857	0.213857	0.205857	0.184857	0.189857	0.222857	0.191857	0.207286	0.00775781
12:30:09	27.7	0.366	0.331	0.32	0.313	0.303	0.339	0.309			0.249	0.214	0.203	0.196	0.186	0.222	0.192	0.208857	0.00818951
12:35:09	27.7	0.367	0.333	0.334	0.313	0.303	0.341	0.31			0.249714	0.215714	0.216714	0.195714	0.185714	0.223714	0.192714	0.211429	0.00834013
12:40:09	27.7	0.37	0.339	0.343	0.313	0.307	0.344	0.311			0.252857	0.221857	0.225857	0.195857	0.189857	0.226857	0.193857	0.215286	0.00870648
12:45:09	27.7	0.359	0.337	0.325	0.314	0.309	0.344	0.312			0.241571	0.219571	0.207571	0.196571	0.191571	0.226571	0.194571	0.211143	0.00710083
12:50:09	27.7	0.346	0.335	0.342	0.31	0.309	0.345	0.312			0.228571	0.217571	0.224571	0.192571	0.191571	0.227571	0.194571	0.211	0.00654238
12:55:09	27.7	0.332	0.331	0.331	0.304	0.308	0.344	0.313			0.214857	0.213857	0.213857	0.186857	0.190857	0.226857	0.195857	0.206143	0.00563879
13:00:09	27.7	0.33	0.335	0.325	0.305	0.308	0.343	0.314			0.212571	0.217571	0.207571	0.187571	0.190571	0.225571	0.196571	0.205429	0.00540471
13:05:09	27.7	0.332	0.335	0.332	0.302	0.308	0.343	0.314			0.214571	0.217571	0.214571	0.184571	0.190571	0.225571	0.196571	0.206286	0.00587454
13:10:09	27.7	0.338	0.34	0.336	0.306	0.31	0.345	0.317			0.220571	0.222571	0.218571	0.188571	0.192571	0.227571	0.199571	0.21	0.0060232
13:15:09	27.7	0.35	0.337	0.338	0.306	0.309	0.345	0.316			0.232571	0.219571	0.220571	0.188571	0.191571	0.227571	0.198571	0.211286	0.00679536
13:20:09	27.7	0.361	0.339	0.338	0.308	0.311	0.346	0.317			0.243	0.221	0.22	0.19	0.193	0.228	0.199	0.213429	0.00749875
13:25:09	27.7	0.368	0.335	0.335	0.306	0.309	0.344	0.315			0.250286	0.217286	0.217286	0.188286	0.191286	0.226286	0.197286	0.212571	0.0083544
13:30:09	27.7	0.373	0.336	0.343	0.306	0.31	0.343	0.317			0.255429	0.218429	0.225429	0.188429	0.192429	0.225429	0.199429	0.215	0.00889317
13:35:09	27.7	0.369	0.334	0.338	0.308	0.312	0.34	0.316			0.251286	0.216286	0.220286	0.190286	0.194286	0.222286	0.198286	0.213286	0.00801487
13:40:09	27.7	0.361	0.33	0.335	0.307	0.31	0.339	0.315			0.243143	0.212143	0.217143	0.189143	0.192143	0.221143	0.197143	0.210286	0.0072323
13:45:09	27.7	0.363	0.334	0.338	0.305	0.311	0.34	0.31			0.244714	0.215714	0.219714	0.186714	0.192714	0.221714	0.191714	0.210429	0.0079334
13:50:09	27.7	0.37	0.345	0.347	0.31	0.319	0.343	0.312			0.251857	0.226857	0.228857	0.191857	0.200857	0.224857	0.193857	0.217	0.00837066
13:55:09	27.7	0.356	0.337	0.34	0.309	0.315	0.343	0.312			0.237857	0.218857	0.221857	0.190857	0.196857	0.224857	0.193857	0.212143	0.00687201
14:00:09	27.7	0.354	0.334	0.339	0.307	0.313	0.342	0.312			0.235571	0.215571	0.220571	0.188571	0.194571	0.223571	0.193571	0.210286	0.00680936
14:05:09	27.7	0.356	0.337	0.342	0.309	0.316	0.344	0.314			0.237571	0.218571	0.223571	0.190571	0.197571	0.225571	0.195571	0.212714	0.00681185
14:10:09	27.7	0.351	0.335	0.339	0.309	0.315	0.343	0.312			0.232286	0.216286	0.220286	0.190286	0.196286	0.224286	0.193286	0.210429	0.00636369
14:15:09	27.7	0.359	0.34	0.344	0.311	0.318	0.345	0.315			0.240143	0.221143	0.225143	0.192143	0.199143	0.226143	0.196143	0.214286	0.00693998
14:20:09	27.7	0.359	0.341	0.344	0.313	0.319	0.345	0.318			0.24	0.222	0.225	0.194	0.2	0.226	0.199	0.215143	0.00657712
14:25:09	27.7	0.359	0.339	0.344	0.314	0.319	0.346	0.318			0.239857	0.219857	0.224857	0.194857	0.199857	0.226857	0.198857	0.215	0.00650065
14:30:09	27.7	0.361	0.34	0.344	0.315	0.32	0.347	0.32			0.241714	0.220714	0.224714	0.195714	0.200714	0.227714	0.200714	0.216	0.0065017
14:35:09	27.7	0.362	0.341	0.346	0.318	0.324	0.35	0.323			0.243143	0.222143	0.227143	0.199143	0.205143	0.231143	0.204143	0.218857	0.00619798
14:40:09	27.7	0.362	0.342	0.348	0.32	0.325	0.351	0.324			0.242857	0.222857	0.228857	0.200857	0.205857	0.231857	0.204857	0.219714	0.00606484
14:45:09	27.7	0.36	0.341	0.346	0.321	0.324	0.351	0.325			0.240714	0.221714	0.226714	0.201714	0.204714	0.231714	0.205714	0.219	0.00573093
14:50:09	27.7	0.358	0.338	0.341	0.32	0.323	0.35	0.324			0.238571	0.218571	0.221571	0.200571	0.203571	0.230571	0.204571	0.216857	0.00551498
14:55:09	27.7	0.358	0.338	0.341	0.319	0.322	0.349	0.325			0.238286	0.218286	0.221286	0.199286	0.202286	0.229286	0.205286	0.216286	0.00553775
15:00:09	27.7	0.362	0.342	0.345	0.32	0.324	0.351	0.326			0.242143	0.222143	0.225143	0.200143	0.204143	0.231143	0.206143	0.218714	0.00591953
15:05:09	27.7	0.364	0.342	0.344	0.32	0.323	0.352	0.327			0.243857	0.221857	0.223857	0.199857	0.202857	0.231857	0.206857	0.218714	0.0061506
15:10:09	27.7	0.366	0.344	0.346	0.322	0.325	0.353	0.329			0.245714	0.223714	0.225714	0.201714	0.204714	0.232714	0.208714	0.220429	0.00610119
15:15:09	27.7	0.363	0.343	0.345	0.323	0.325	0.353	0.329			0.242429	0.222429	0.224429	0.202429	0.204429	0.232429	0.208429	0.219571	0.00570475
15:20:09	27.7	0.363	0.343	0.345	0.323	0.325	0.353	0.329			0.242429	0.222429	0.224429	0.202429	0.204429	0.232429	0.208429	0.219571	0.00570475
15:25:09	27.7	0.361	0.341	0.342	0.322	0.324	0.35	0.328			0.240143	0.220143	0.221143	0.201143	0.203143	0.229143	0.207143	0.217429	0.0054542
15:30:09	27.7	0.363	0.339	0.338	0.321	0.323	0.347	0.327			0.241857	0.217857	0.216857	0.199857	0.201857	0.225857	0.205857	0.215714	0.00563336
15:35:09	27.7	0.364	0.344	0.341	0.323	0.324	0.348	0.329			0.243286	0.223286	0.220286	0.202286	0.203286	0.227286	0.208286	0.218286	0.00559762
15:40:09	27.7	0.362	0.342	0.341	0.324	0.325	0.348	0.329			0.241143	0.221143	0.220143	0.203143	0.204143	0.227143	0.208143	0.217857	0.00521771
15:45:09	27.7	0.367	0.342	0.341	0.322	0.324	0.348	0.327			0.246714	0.221714	0.220714	0.201714	0.203714	0.227714	0.206714	0.218429	0.00604631
15:50:09	27.7	0.364	0.345	0.342	0.323	0.326	0.348	0.329			0.243857	0.224857	0.221857	0.202857	0.205857	0.227857	0.208857	0.219429	0.00550695
15:55:09	27.7	0.365	0.347	0.344	0.328	0.329	0.35	0.331			0.244429	0.226429	0.223429	0.207429	0.208429	0.229429	0.210429	0.221429	0.00513624
16:00:09	27.7	0.362	0.345	0.346	0.328	0.329	0.351	0.331			0.241714	0.224714	0.225714	0.207714	0.208714	0.230714	0.210714	0.221429	0.00485854
16:05:09	27.7	0.365	0.345	0.348	0.331	0.331	0.354	0.334			0.245	0.225	0.228	0.211	0.211	0.234	0.214	0.224	0.00486973
16:10:09	27.7	0.364	0.345	0.35	0.331	0.33	0.355	0.334			0.243571	0.224571	0.229571	0.210571	0.209571	0.234571	0.213571	0.223714	0.00493495
16:15:09	27.7	0.37	0.349	0.356	0.334	0.334	0.359	0.338			0.249857	0.228857	0.235857	0.213857	0.213857	0.238857	0.217857	0.228429	0.00525474
16:20:09	27.7	0.368	0.348	0.351	0.336	0.334	0.356	0.331			0.247714	0.227714	0.230714	0.215714	0.213714	0.235714	0.210714	0.226	0.00507428
16:25:09	27.7	0.367	0.345	0.348	0.334	0.332	0.353	0.329			0.246429	0.224429	0.227429	0.213429	0.211429	0.232429	0.208429	0.223429	0.00510835
16:30:09	27.7	0.368	0.35	0.353	0.336	0.335	0.356	0.33			0.247429	0.229429	0.232429	0.215429	0.214429	0.235429	0.209429	0.226286	0.00516595
16:35:09	27.7	0.366	0.346	0.351	0.334	0.333	0.354	0.328			0.245	0.225	0.23	0.213	0.212	0.233	0.207	0.223571	0.00514484
16:40:09	27.7	0.37	0.35	0.355	0.336	0.336	0.358	0.331			0.249571	0.229571	0.234571	0.215571	0.215571	0.237571	0.210571	0.227571	0.00537631
16:45:09	27.7	0.373	0.353	0.358	0.339	0.338	0.362	0.333			0.252286	0.232286	0.237286	0.218286	0.217286	0.241286	0.212286	0.230143	0.00555247
16:50:09	27.7	0.374	0.352	0.36	0.341	0.343	0.363	0.335			0.253429	0.231429	0.239429	0.220429	0.222429	0.242429	0.214429	0.232	0.0052502
16:55:09	27.7	0.374	0.348	0.356	0.335	0.337	0.359	0.332			0.253429	0.227429	0.235429	0.214429	0.216429	0.238429	0.211429	0.228143	0.00578057
17:00:09	27.6	0.377	0.351	0.357	0.335	0.336	0.358	0.332			0.256429	0.230429	0.236429	0.214429	0.215429	0.237429	0.211429	0.228857	0.00614452
17:05:09	27.6	0.379	0.357	0.36	0.338	0.34	0.362	0.334			0.258143	0.236143	0.239143	0.217143	0.219143	0.241143	0.213143	0.232	0.00612733
17:10:09	27.6	0.38	0.359	0.365	0.343	0.345	0.365	0.338			0.259429	0.238429	0.244429	0.222429	0.224429	0.244429	0.217429	0.235857	0.00568983
17:15:09	27.7	0.379	0.356	0.365	0.341	0.34	0.363	0.336			0.258714	0.235714	0.244714	0.220714	0.219714	0.242714	0.215714	0.234	0.00601472
17:20:09	27.6	0.38	0.355	0.364	0.34	0.339	0.361	0.335			0.259714	0.234714	0.243714	0.219714	0.218714	0.240714	0.214714	0.233143	0.00618315
17:25:09	27.6	0.38	0.356	0.365	0.34	0.34	0.362	0.336			0.259286	0.235286	0.244286	0.219286	0.219286	0.241286	0.215286	0.233429	0.0061351
17:30:09	27.7	0.381	0.355	0.363	0.343	0.343	0.358	0.337			0.260143	0.234143	0.242143	0.222143	0.222143	0.237143	0.216143	0.233429	0.00568504
17:35:09	27.6	0.381	0.357	0.368	0.346	0.346	0.355	0.339			0.259714	0.235714	0.246714	0.224714	0.224714	0.233714	0.217714	0.234714	0.00547723
17:40:09	27.6	0.38	0.355	0.366	0.344	0.345	0.355	0.338			0.258429	0.233429	0.244429	0.222429	0.223429	0.233429	0.216429	0.233143	0.00546728
17:45:09	27.7	0.381	0.356	0.366	0.344	0.345	0.355	0.339			0.259429	0.234429	0.244429	0.222429	0.223429	0.233429	0.217429	0.233571	0.00550942
17:50:09	27.7	0.384	0.359	0.375	0.347	0.348	0.36	0.343			0.261857	0.236857	0.252857	0.224857	0.225857	0.237857	0.220857	0.237286	0.00577704
17:55:09	27.6	0.384	0.357	0.369	0.345	0.346	0.357	0.341			0.262	0.235	0.247	0.223	0.224	0.235	0.219	0.235	0.00576112
18:00:09	27.7	0.385	0.359	0.372	0.346	0.347	0.358	0.342			0.262714	0.236714	0.249714	0.223714	0.224714	0.235714	0.219714	0.236143	0.00586701
18:05:09	27.6	0.385	0.359	0.37	0.344	0.344	0.358	0.341			0.263429	0.237429	0.248429	0.222429	0.222429	0.236429	0.219429	0.235714	0.00607773
18:10:09	27.6	0.388	0.361	0.376	0.349	0.349	0.359	0.344			0.266571	0.239571	0.254571	0.227571	0.227571	0.237571	0.222571	0.239429	0.00604518
18:15:09	27.6	0.387	0.358	0.371	0.345	0.346	0.353	0.339			0.265571	0.236571	0.249571	0.223571	0.224571	0.231571	0.217571	0.235571	0.00636583
18:20:09	27.6	0.387	0.36	0.37	0.347	0.347	0.354	0.341			0.265143	0.238143	0.248143	0.225143	0.225143	0.232143	0.219143	0.236143	0.00604743
18:25:09	27.6	0.387	0.359	0.37	0.343	0.342	0.352	0.338			0.265286	0.237286	0.248286	0.221286	0.220286	0.230286	0.216286	0.234143	0.00667415
18:30:09	27.6	0.388	0.361	0.373	0.345	0.345	0.353	0.34			0.266	0.239	0.251	0.223	0.223	0.231	0.218	0.235857	0.00658436
18:35:09	27.6	0.389	0.365	0.375	0.344	0.35	0.356	0.344			0.267143	0.243143	0.253143	0.222143	0.228143	0.234143	0.222143	0.238571	0.00639515
18:40:09	27.7	0.388	0.367	0.379	0.347	0.353	0.359	0.346			0.266286	0.245286	0.257286	0.225286	0.231286	0.237286	0.224286	0.241	0.00608947
18:45:09	27.7	0.387	0.365	0.379	0.348	0.354	0.362	0.347			0.265143	0.243143	0.257143	0.226143	0.232143	0.240143	0.225143	0.241286	0.00577115
18:50:09	27.6	0.39	0.365	0.378	0.349	0.354	0.36	0.347			0.267857	0.242857	0.255857	0.226857	0.231857	0.237857	0.224857	0.241143	0.005975
18:55:09	27.7	0.39	0.366	0.38	0.348	0.353	0.36	0.348			0.268714	0.244714	0.258714	0.226714	0.231714	0.238714	0.226714	0.242286	0.00614064
19:00:09	27.6	0.391	0.364	0.374	0.344	0.351	0.356	0.344			0.269714	0.242714	0.252714	0.222714	0.229714	0.234714	0.222714	0.239286	0.00650954
19:05:09	27.6	0.393	0.367	0.38	0.346	0.353	0.357	0.344			0.271429	0.245429	0.258429	0.224429	0.231429	0.235429	0.222429	0.241286	0.00688486
19:10:09	27.6	0.394	0.369	0.385	0.351	0.357	0.362	0.348			0.272429	0.247429	0.263429	0.229429	0.235429	0.240429	0.226429	0.245	0.00654238
19:15:09	27.6	0.393	0.367	0.378	0.347	0.356	0.36	0.347			0.271429	0.245429	0.256429	0.225429	0.234429	0.238429	0.225429	0.242429	0.00636957
19:20:09	27.6	0.394	0.369	0.383	0.343	0.353	0.361	0.347			0.272	0.247	0.261	0.221	0.231	0.239	0.225	0.242286	0.00714714
19:25:09	27.6	0.394	0.369	0.379	0.346	0.355	0.361	0.347			0.272286	0.247286	0.257286	0.224286	0.233286	0.239286	0.225286	0.242714	0.00663991
19:30:09	27.6	0.399	0.374	0.387	0.348	0.356	0.362	0.35			0.277143	0.252143	0.265143	0.226143	0.234143	0.240143	0.228143	0.246143	0.00733874
19:35:09	27.6	0.397	0.372	0.381	0.345	0.353	0.356	0.347			0.274857	0.249857	0.258857	0.222857	0.230857	0.233857	0.224857	0.242286	0.00736096
19:40:09	27.6	0.398	0.373	0.385	0.347	0.355	0.357	0.349			0.275429	0.250429	0.262429	0.224429	0.232429	0.234429	0.226429	0.243714	0.00737665
19:45:09	27.6	0.399	0.375	0.388	0.347	0.359	0.361	0.352			0.276571	0.252571	0.265571	0.224571	0.236571	0.238571	0.229571	0.246286	0.00729225
19:50:09	27.6	0.4	0.376	0.394	0.35	0.362	0.36	0.353			0.277286	0.253286	0.271286	0.227286	0.239286	0.237286	0.230286	0.248	0.0074983
19:55:09	27.6	0.399	0.375	0.388	0.348	0.361	0.362	0.353			0.276	0.252	0.265	0.225	0.238	0.239	0.23	0.246429	0.00708068
20:00:09	27.7	0.399	0.374	0.383	0.346	0.358	0.36	0.351			0.276	0.251	0.26	0.223	0.235	0.237	0.228	0.244286	0.00716378
20:05:09	27.6	0.403	0.377	0.388	0.347	0.359	0.359	0.352			0.279571	0.253571	0.264571	0.223571	0.235571	0.235571	0.228571	0.245857	0.00779717
20:10:09	27.6	0.402	0.379	0.382	0.347	0.358	0.361	0.353			0.278857	0.255857	0.258857	0.223857	0.234857	0.237857	0.229857	0.245714	0.0073725
20:15:09	27.6	0.404	0.38	0.384	0.349	0.36	0.363	0.354			0.280857	0.256857	0.260857	0.225857	0.236857	0.239857	0.230857	0.247429	0.00739323
20:20:09	27.6	0.405	0.379	0.383	0.35	0.362	0.363	0.356			0.281714	0.255714	0.259714	0.226714	0.238714	0.239714	0.232714	0.247857	0.00719599
20:25:09	27.6	0.405	0.381	0.382	0.35	0.361	0.365	0.357			0.281714	0.257714	0.258714	0.226714	0.237714	0.241714	0.233714	0.248286	0.00715095
20:30:09	27.6	0.405	0.381	0.381	0.346	0.358	0.361	0.354			0.281286	0.257286	0.257286	0.222286	0.234286	0.237286	0.230286	0.245714	0.0077486
20:35:09	27.6	0.407	0.383	0.383	0.347	0.359	0.358	0.353			0.283286	0.259286	0.259286	0.223286	0.235286	0.234286	0.229286	0.246286	0.00815037
20:40:09	27.7	0.408	0.387	0.389	0.352	0.365	0.363	0.357			0.284	0.263	0.265	0.228	0.241	0.239	0.233	0.250429	0.00775167
20:45:09	27.6	0.406	0.385	0.384	0.352	0.363	0.361	0.357			0.282143	0.261143	0.260143	0.228143	0.239143	0.237143	0.233143	0.248714	0.00739001
20:50:09	27.6	0.406	0.384	0.387	0.355	0.367	0.365	0.361			0.282143	0.260143	0.263143	0.231143	0.243143	0.241143	0.237143	0.251143	0.00680686
20:55:09	27.6	0.407	0.385	0.393	0.353	0.365	0.363	0.358			0.283	0.261	0.269	0.229	0.241	0.239	0.234	0.250857	0.00766075
21:00:09	27.6	0.407	0.385	0.385	0.352	0.364	0.363	0.359			0.282714	0.260714	0.260714	0.227714	0.239714	0.238714	0.234714	0.249286	0.00733503
21:05:09	27.6	0.408	0.386	0.386	0.351	0.364	0.364	0.359			0.284143	0.262143	0.262143	0.227143	0.240143	0.240143	0.235143	0.250143	0.00755614
21:10:09	27.6	0.41	0.387	0.391	0.354	0.367	0.365	0.36			0.286	0.263	0.267	0.23	0.243	0.241	0.236	0.252286	0.00762738
21:15:09	27.6	0.412	0.388	0.392	0.356	0.369	0.366	0.362			0.287857	0.263857	0.267857	0.231857	0.244857	0.241857	0.237857	0.253714	0.00758579
21:20:09	27.6	0.411	0.387	0.387	0.353	0.364	0.363	0.358			0.287143	0.263143	0.263143	0.229143	0.240143	0.239143	0.234143	0.250857	0.00790031
21:25:09	27.6	0.413	0.39	0.393	0.354	0.367	0.364	0.359			0.288857	0.265857	0.268857	0.229857	0.242857	0.239857	0.234857	0.253	0.00822722
21:30:09	27.6	0.414	0.392	0.388	0.356	0.368	0.366	0.361			0.289714	0.267714	0.263714	0.231714	0.243714	0.241714	0.236714	0.253571	0.00788135
21:35:09	27.6	0.411	0.392	0.388	0.356	0.369	0.365	0.362			0.287143	0.268143	0.264143	0.232143	0.245143	0.241143	0.238143	0.253714	0.00751778
21:40:09	27.6	0.412	0.393	0.392	0.357	0.37	0.366	0.363			0.289	0.27	0.269	0.234	0.247	0.243	0.24	0.256	0.00762827
21:45:09	27.6	0.412	0.391	0.392	0.353	0.365	0.364	0.361			0.289	0.268	0.269	0.23	0.242	0.241	0.238	0.253857	0.00815162
21:50:09	27.6	0.411	0.391	0.388	0.355	0.367	0.364	0.362			0.287714	0.267714	0.264714	0.231714	0.243714	0.240714	0.238714	0.253571	0.00763896
21:55:09	27.6	0.412	0.392	0.392	0.355	0.367	0.365	0.363			0.288429	0.268429	0.268429	0.231429	0.243429	0.241429	0.239429	0.254429	0.00785584
22:00:09	27.6	0.413	0.394	0.393	0.357	0.369	0.367	0.366			0.289571	0.270571	0.269571	0.233571	0.245571	0.243571	0.242571	0.256429	0.00766696
22:05:09	27.6	0.412	0.394	0.393	0.356	0.369	0.365	0.364			0.288429	0.270429	0.269429	0.232429	0.245429	0.241429	0.240429	0.255429	0.0078072
22:10:09	27.6	0.413	0.394	0.39	0.357	0.369	0.367	0.366			0.289143	0.270143	0.266143	0.233143	0.245143	0.243143	0.242143	0.255571	0.00755569
22:15:09	27.6	0.414	0.396	0.393	0.356	0.369	0.365	0.365			0.290286	0.272286	0.269286	0.232286	0.245286	0.241286	0.241286	0.256	0.00805846
22:20:09	27.6	0.415	0.396	0.39	0.356	0.368	0.367	0.365			0.291	0.272	0.266	0.232	0.244	0.243	0.241	0.255571	0.0080085
22:25:09	27.6	0.414	0.398	0.395	0.357	0.369	0.368	0.366			0.29	0.274	0.271	0.233	0.245	0.244	0.242	0.257	0.008
22:30:09	27.6	0.414	0.399	0.392	0.357	0.358	0.367	0.366			0.290429	0.275429	0.268429	0.233429	0.234429	0.243429	0.242429	0.255429	0.0084965
22:35:09	27.6	0.417	0.401	0.393	0.356	0.358	0.365	0.365			0.293	0.277	0.269	0.232	0.234	0.241	0.241	0.255286	0.00910969
22:40:09	27.6	0.418	0.401	0.394	0.359	0.361	0.37	0.37			0.293714	0.276714	0.269714	0.234714	0.236714	0.245714	0.245714	0.257571	0.00853405
22:45:09	27.6	0.416	0.402	0.396	0.36	0.363	0.37	0.37			0.292143	0.278143	0.272143	0.236143	0.239143	0.246143	0.246143	0.258571	0.00828612
22:50:09	27.6	0.418	0.4	0.395	0.359	0.363	0.37	0.37			0.294143	0.276143	0.271143	0.235143	0.239143	0.246143	0.246143	0.258286	0.00840473
22:55:09	27.6	0.417	0.4	0.401	0.361	0.363	0.372	0.372			0.292857	0.275857	0.276857	0.236857	0.238857	0.247857	0.247857	0.259571	0.0082972
23:00:09	27.6	0.415	0.402	0.397	0.359	0.362	0.371	0.371			0.290714	0.277714	0.272714	0.234714	0.237714	0.246714	0.246714	0.258143	0.00828612
23:05:09	27.6	0.415	0.402	0.4	0.36	0.363	0.37	0.371			0.290857	0.277857	0.275857	0.235857	0.238857	0.245857	0.246857	0.258857	0.00833238
23:10:09	27.6	0.416	0.403	0.395	0.362	0.364	0.371	0.372			0.291429	0.278429	0.270429	0.237429	0.239429	0.246429	0.247429	0.258714	0.00801699
23:15:09	27.6	0.417	0.404	0.397	0.362	0.363	0.373	0.371			0.292571	0.279571	0.272571	0.237571	0.238571	0.248571	0.246571	0.259429	0.00827051
23:20:09	27.6	0.413	0.404	0.389	0.356	0.356	0.368	0.361			0.288286	0.279286	0.264286	0.231286	0.231286	0.243286	0.236286	0.253429	0.00896934
23:25:09	27.6	0.412	0.406	0.398	0.361	0.361	0.372	0.364			0.287143	0.281143	0.273143	0.236143	0.236143	0.247143	0.239143	0.257143	0.0085049
23:30:09	27.6	0.413	0.406	0.396	0.361	0.361	0.37	0.363			0.288857	0.281857	0.271857	0.236857	0.236857	0.245857	0.238857	0.257286	0.00861576
23:35:09	27.6	0.412	0.405	0.397	0.36	0.362	0.371	0.364			0.287714	0.280714	0.272714	0.235714	0.237714	0.246714	0.239714	0.257286	0.00842575
23:40:09	27.6	0.412	0.407	0.395	0.362	0.363	0.369	0.363			0.287571	0.282571	0.270571	0.237571	0.238571	0.244571	0.238571	0.257143	0.00842857
23:45:09	27.6	0.414	0.407	0.403	0.363	0.365	0.374	0.368			0.289286	0.282286	0.278286	0.238286	0.240286	0.249286	0.243286	0.260143	0.00837066
23:50:09	27.6	0.411	0.407	0.398	0.363	0.365	0.372	0.366			0.286429	0.282429	0.273429	0.238429	0.240429	0.247429	0.241429	0.258571	0.00804579
23:55:09	27.6	0.414	0.407	0.396	0.362	0.364	0.372	0.367			0.289143	0.282143	0.271143	0.237143	0.239143	0.247143	0.242143	0.258286	0.00828777
1 day, 0:00:09	27.6	0.414	0.407	0.401	0.363	0.365	0.373	0.367			0.289	0.282	0.276	0.238	0.24	0.248	0.242	0.259286	0.00835154
1 day, 0:05:09	27.6	0.413	0.409	0.401	0.361	0.363	0.372	0.366			0.287714	0.283714	0.275714	0.235714	0.237714	0.246714	0.240714	0.258286	0.00871741
1 day, 0:10:09	27.6	0.412	0.409	0.401	0.363	0.364	0.373	0.368			0.286286	0.283286	0.275286	0.237286	0.238286	0.247286	0.242286	0.258571	0.00833156
1 day, 0:15:09	27.6	0.411	0.409	0.404	0.365	0.366	0.374	0.369			0.285286	0.283286	0.278286	0.239286	0.240286	0.248286	0.243286	0.259714	0.00809132
1 day, 0:20:09	27.6	0.41	0.41	0.401	0.364	0.364	0.374	0.368			0.283857	0.283857	0.274857	0.237857	0.237857	0.247857	0.241857	0.258286	0.00815871
1 day, 0:25:09	27.6	0.408	0.408	0.4	0.363	0.364	0.373	0.369			0.281714	0.281714	0.273714	0.236714	0.237714	0.246714	0.242714	0.257286	0.00785844
1 day, 0:30:09	27.6	0.408	0.408	0.405	0.365	0.368	0.375	0.372			0.281571	0.281571	0.278571	0.238571	0.241571	0.248571	0.245571	0.259429	0.00757637
1 day, 0:35:09	27.6	0.408	0.408	0.402	0.367	0.369	0.376	0.375			0.281714	0.281714	0.275714	0.240714	0.242714	0.249714	0.248714	0.260143	0.00706048
1 day, 0:40:09	27.6	0.408	0.406	0.398	0.364	0.365	0.374	0.372			0.282143	0.280143	0.272143	0.238143	0.239143	0.248143	0.246143	0.258	0.00733689
1 day, 0:45:09	27.6	0.409	0.408	0.398	0.367	0.369	0.376	0.373			0.282143	0.281143	0.271143	0.240143	0.242143	0.249143	0.246143	0.258857	0.00702958
1 day, 0:50:09	27.6	0.41	0.408	0.399	0.367	0.368	0.374	0.372			0.283857	0.281857	0.272857	0.240857	0.241857	0.247857	0.245857	0.259286	0.00732204
1 day, 0:55:09	27.6	0.412	0.409	0.399	0.364	0.365	0.372	0.37			0.285	0.282	0.272	0.237	0.238	0.245	0.243	0.257429	0.00806774
1 day, 1:00:09	27.7	0.413	0.41	0.402	0.365	0.366	0.372	0.371			0.285714	0.282714	0.274714	0.237714	0.238714	0.244714	0.243714	0.258286	0.00819656

## Sheet: calculations
Vmax, R2, t at Vmax, lagtime calculations for a sliding window of 12, 9, and 6 points (each between 2 hours and 12 hours). The sliding window chosen for further analyses was 9 points.
Sliding window of 12 points						Sliding window of 9 points						Sliding window of 6 points
Well	JG12n_2h12h: Max V [600]	JG12n_2h12h: R-Squared [600]	JG12n_2h12h: t at Max V [600]	JG12n_2h12h: Lagtime [600]		Well	JG9n_2h12h: Max V [600]	JG9n_2h12h: R-Squared [600]	JG9n_2h12h: t at Max V [600]	JG9n_2h12h: Lagtime [600]		Well	JG6n_2h12h: Max V [600]	JG6n_2h12h: R-Squared [600]	JG6n_2h12h: t at Max V [600]	JG6n_2h12h: Lagtime [600]
A1	-0.006	0.715	03:02:39	02:43:00		A1	-0.008	0.684	03:15:09	02:50:31		A1	-0.01	0.604	02:17:39	02:15:56
B1	0.17	0.995	04:27:39	02:17:09		B1	-0.184	0.926	08:55:09	?????		B1	-0.224	0.91	08:52:39	?????
C1	0.193	0.997	03:52:39	02:07:51		C1	0.199	0.998	03:55:09	02:11:24		C1	-0.297	0.885	11:07:39	?????
D1	-0.237	0.772	11:27:39	?????		D1	-0.314	0.777	11:25:09	?????		D1	-0.45	0.753	11:27:39	?????
E1	0.193	0.998	04:12:39	02:09:20		E1	0.198	0.996	03:50:09	02:11:30		E1	-0.283	0.817	08:47:39	11:34:04
F1	0.203	0.999	02:27:39	?????		F1	0.205	0.999	02:20:09	?????		F1	-0.335	0.867	08:22:39	10:30:18
G1	0.229	0.999	04:12:39	02:19:35		G1	0.235	0.999	04:05:09	02:21:50		G1	-0.326	0.925	06:47:39	08:58:28
H1	0.208	0.988	06:17:39	02:51:07		H1	-0.275	0.755	08:15:09	11:02:11		H1	-0.465	0.876	08:12:39	09:52:03
A2	-0.015	0.921	09:47:39	06:29:02		A2	-0.017	0.966	08:55:09	06:45:05		A2	-0.018	0.954	08:52:39	06:54:10
B2	2.705	0.912	07:47:39	06:52:26		B2	2.876	0.949	07:30:09	06:53:21		B2	3.403	0.931	07:37:39	07:00:32
C2	2.933	0.936	08:12:39	07:38:27		C2	3.446	0.94	08:10:09	07:42:59		C2	4.628	0.977	08:07:39	07:49:00
D2	3.411	0.925	08:02:39	07:33:45		D2	4.194	0.945	08:05:09	07:40:24		D2	5.593	0.994	08:07:39	07:46:57
E2	0.171	0.948	02:27:39	?????		E2	0.202	0.974	02:20:09	?????		E2	0.241	0.986	02:12:39	?????
F2	2.564	0.982	08:27:39	07:49:05		F2	2.9	0.993	08:30:09	07:54:17		F2	3.121	0.988	08:32:39	07:57:05
G2	3.708	0.871	08:27:39	07:57:45		G2	4.809	0.896	08:25:09	08:03:19		G2	6.427	0.886	08:22:39	08:08:14
H2	-0.242	0.774	07:22:39	10:03:24		H2	-0.344	0.847	07:20:09	09:14:28		H2	-0.494	0.865	07:22:39	08:41:02
A3	-0.253	0.796	10:47:39	?????		A3	-0.345	0.836	10:45:09	?????		A3	-0.513	0.879	10:42:39	?????
B3	1.893	0.934	08:42:39	07:34:58		B3	2.157	0.918	08:35:09	07:41:33		B3	2.748	0.928	08:32:39	07:51:44
C3	0.165	0.954	02:27:39	?????		C3	0.202	0.984	02:20:09	?????		C3	0.227	0.993	02:12:39	?????
D3	2.877	0.987	08:17:39	07:35:00		D3	3.129	0.988	08:20:09	07:38:38		D3	3.526	0.991	08:27:39	07:44:31
E3	3.293	0.882	09:02:39	08:36:12		E3	4.159	0.891	09:05:09	08:42:45		E3	5.7	0.909	09:07:39	08:49:15
F3	2.48	0.974	08:52:39	08:10:19		F3	2.723	0.964	08:40:09	08:12:04		F3	3.34	0.971	08:42:39	08:17:54
G3	-0.168	0.934	06:47:39	06:21:07		G3	-0.197	0.924	06:50:09	06:25:57		G3	0.264	0.993	02:12:39	?????
H3	0.205	0.999	04:12:39	02:10:53		H3	0.207	0.999	03:55:09	02:11:43		H3	0.213	0.999	03:52:39	02:14:29
A4	0.205	0.999	03:37:39	02:08:59		A4	0.208	0.997	03:45:09	02:10:20		A4	-0.319	0.759	10:32:39	?????
B4	2.498	0.92	09:22:39	08:34:33		B4	2.627	0.864	09:40:09	08:38:25		B4	3.121	0.759	09:42:39	08:49:08
C4	3.03	0.848	08:42:39	08:08:17		C4	3.864	0.878	08:40:09	08:14:12		C4	5.531	0.917	08:37:39	08:20:33
D4	2.579	0.972	08:52:39	08:11:46		D4	2.48	0.941	09:05:09	08:10:08		D4	3.37	0.984	09:07:39	08:25:45
E4	-0.156	0.971	05:17:39	05:06:56		E4	-0.201	0.882	11:15:09	10:07:56		E4	-0.282	0.902	11:17:39	10:27:40
F4	3.126	0.97	08:57:39	08:21:10		F4	3.309	0.948	09:00:09	08:23:02		F4	3.861	0.955	08:47:39	08:25:51
G4	3.765	0.895	08:47:39	08:22:50		G4	4.64	0.893	08:50:09	08:28:20		G4	6.139	0.873	08:47:39	08:32:49
H4	0.06	0.995	09:27:39	07:26:49		H4	0.063	0.994	09:35:09	07:32:45		H4	0.07	0.997	09:37:39	07:44:49
A5	0.203	0.998	03:12:39	02:07:33		A5	-0.269	0.692	09:55:09	?????		A5	-0.45	0.77	09:57:39	11:44:06
B5	3.322	0.959	08:17:39	07:42:45		B5	3.637	0.934	08:15:09	07:45:37		B5	4.638	0.951	08:07:39	07:49:36
C5	0.195	0.957	02:27:39	?????		C5	0.24	0.995	02:20:09	02:01:06		C5	0.253	0.99	02:22:39	02:02:12
D5	3.316	0.961	08:22:39	07:48:37		D5	3.7	0.955	08:25:09	07:52:03		D5	3.899	0.972	08:12:39	07:52:15
E5	2.923	0.906	09:02:39	08:31:19		E5	3.726	0.938	09:00:09	08:36:54		E5	4.714	0.934	08:57:39	08:41:26
F5	3.79	0.924	08:27:39	07:58:34		F5	4.577	0.924	08:30:09	08:04:18		F5	6.055	0.934	08:32:39	08:11:12
G5	0.191	0.917	02:27:39	?????		G5	0.241	0.987	02:20:09	?????		G5	0.266	0.986	02:12:39	02:00:25
H5	-0.297	0.844	09:17:39	11:29:51		H5	-0.341	0.793	09:10:09	11:10:43		H5	-0.473	0.745	09:07:39	10:36:21
A6	0.218	0.997	02:57:39	02:00:27		A6	-0.25	0.826	09:45:09	?????		A6	-0.363	0.854	09:42:39	?????
B6	2.157	0.821	08:57:39	08:05:55		B6	2.44	0.849	08:35:09	08:07:08		B6	3.742	0.924	08:37:39	08:18:04
C6	2.856	0.919	08:12:39	07:40:39		C6	3.309	0.89	08:10:09	07:44:27		C6	4.671	0.925	08:07:39	07:50:31
D6	3.042	0.928	08:52:39	08:16:44		D6	3.548	0.91	08:45:09	08:20:02		D6	4.615	0.897	08:52:39	08:28:11
E6	0.198	0.948	02:27:39	?????		E6	0.242	0.975	02:20:09	?????		E6	0.268	0.955	02:12:39	?????
F6	0.246	0.985	02:27:39	?????		F6	0.269	0.984	02:20:09	?????		F6	0.302	0.979	02:12:39	?????
G6	0.154	0.845	02:27:39	?????		G6	0.211	0.937	02:20:09	?????		G6	0.266	0.946	02:12:39	?????
H6	0.214	1	02:27:39	?????		H6	-0.297	0.841	08:30:09	11:02:41		H6	-0.39	0.797	08:32:39	10:27:08
A7	-0.305	0.928	08:42:39	10:54:59		A7	-0.362	0.926	08:40:09	10:33:33		A7	-0.426	0.903	08:32:39	10:14:48
B7	5.535	0.926	06:12:39	05:02:18		B7	6.596	0.919	06:15:09	05:14:27		B7	8.766	0.927	06:12:39	05:28:38
C7	3.21	0.869	09:27:39	07:54:07		C7	3.884	0.84	09:25:09	08:09:49		C7	5.628	0.853	09:22:39	08:32:14
D7	5.671	0.928	05:22:39	04:28:33		D7	7.003	0.946	05:25:09	04:39:45		D7	9.098	0.97	05:27:39	04:50:44
E7	-0.376	0.778	10:52:39	?????		E7	-0.497	0.784	10:50:09	?????		E7	-0.799	0.867	10:47:39	11:40:41
F7	5.722	0.958	06:07:39	05:10:03		F7	6.828	0.975	06:10:09	05:20:02		F7	8.28	0.988	06:07:39	05:28:11
G7	3.346	0.914	10:17:39	09:00:40		G7	3.948	0.892	10:10:09	09:10:26		G7	5.507	0.915	10:12:39	09:28:14
H7	0.221	0.998	02:27:39	?????		H7	0.234	0.997	04:50:09	02:35:46		H7	-0.277	0.638	10:37:39	?????
A8	-0.27	0.794	11:12:39	?????		A8	-0.276	0.801	11:25:09	?????		A8	-0.428	0.854	11:27:39	?????
B8	4.402	0.92	05:42:39	04:25:42		B8	5.334	0.92	05:45:09	04:39:59		B8	7.193	0.938	05:47:39	04:57:32
C8	0.248	0.992	05:07:39	02:16:29		C8	0.264	0.997	05:15:09	02:27:31		C8	0.28	0.997	05:22:39	02:37:32
D8	6.093	0.931	05:42:39	04:47:36		D8	7.516	0.951	05:40:09	04:57:19		D8	9.588	0.972	05:42:39	05:07:37
E8	2.883	0.956	10:37:39	09:04:58		E8	3.295	0.947	10:35:09	09:16:05		E8	4.109	0.936	10:32:39	09:30:58
F8	5.653	0.939	05:47:39	04:50:54		F8	6.824	0.951	05:50:09	05:01:28		F8	8.899	0.977	05:47:39	05:12:02
G8	-0.284	0.761	11:07:39	?????		G8	-0.384	0.778	11:05:09	?????		G8	-0.575	0.79	11:02:39	?????
H8	-0.394	0.937	10:02:39	?????		H8	-0.436	0.917	09:55:09	11:53:02		H8	-0.496	0.823	09:57:39	11:38:56
A9	-0.512	0.801	10:42:39	11:54:44		A9	-0.611	0.74	10:50:09	11:45:12		A9	-0.933	0.742	10:47:39	11:25:13
B9	6.065	0.903	06:47:39	05:52:42		B9	7.698	0.927	06:50:09	06:05:32		B9	10.285	0.954	06:52:39	06:18:00
C9	2.311	0.84	09:32:39	08:30:41		C9	2.947	0.837	09:35:09	08:45:11		C9	4.489	0.899	09:32:39	09:01:03
D9	5.31	0.913	06:07:39	05:01:04		D9	6.643	0.931	06:10:09	05:15:09		D9	8.701	0.947	06:07:39	05:27:30
E9	0.273	0.998	04:32:39	02:14:03		E9	0.282	0.998	04:40:09	02:18:49		E9	-0.386	0.792	09:22:39	11:35:16
F9	5.24	0.932	06:02:39	05:06:52		F9	6.343	0.939	06:05:09	05:17:14		F9	8.279	0.952	06:02:39	05:27:35
G9	-2.303	0.987	02:27:39	?????		G9	2.631	0.927	09:30:09	10:54:19		G9	3.454	0.933	09:27:39	10:33:41
H9	-0.268	0.646	11:22:39	?????		H9	-0.322	0.6	11:35:09	?????		H9	-0.562	0.677	11:37:39	?????
A10	-0.324	0.766	10:27:39	11:44:54		A10	-0.456	0.821	10:25:09	11:21:48		A10	-0.663	0.841	10:27:39	11:05:31
B10	5.108	0.918	06:22:39	05:49:34		B10	6.414	0.941	06:25:09	05:57:08		B10	8.446	0.97	06:27:39	06:04:28
C10	-0.381	0.813	10:07:39	11:51:06		C10	-0.458	0.766	10:05:09	11:32:52		C10	-0.679	0.754	09:57:39	11:00:52
D10	5.302	0.882	06:02:39	05:06:56		D10	6.793	0.9	06:00:09	05:18:15		D10	9.398	0.935	06:02:39	05:31:23
E10	3.054	0.949	09:42:39	08:16:29		E10	3.529	0.94	09:40:09	08:27:38		E10	3.738	0.85	09:37:39	08:32:03
F10	5.129	0.943	06:17:39	05:22:08		F10	6.206	0.958	06:20:09	05:32:22		F10	7.93	0.986	06:17:39	05:41:55
G10	-0.334	0.811	10:07:39	?????		G10	-0.448	0.841	10:10:09	?????		G10	-0.627	0.825	10:07:39	11:29:08
H10	-0.251	0.694	10:57:39	?????		H10	-0.374	0.78	10:55:09	?????		H10	-0.603	0.868	10:52:39	?????
A11	-0.39	0.79	11:02:39	?????		A11	-0.533	0.828	11:00:09	?????		A11	-0.762	0.824	10:57:39	11:44:03
B11	4.84	0.922	05:47:39	04:41:29		B11	5.824	0.918	05:50:09	04:53:15		B11	7.84	0.939	05:47:39	05:07:06
C11	3.521	0.931	10:17:39	09:03:06		C11	4.189	0.927	10:20:09	09:15:41		C11	5.077	0.889	10:17:39	09:26:15
D11	5.163	0.921	05:52:39	04:55:04		D11	6.402	0.939	05:55:09	05:07:17		D11	8.276	0.949	05:57:39	05:18:58
E11	0.28	0.999	04:17:39	02:15:48		E11	0.281	0.997	04:25:09	02:16:19		E11	0.295	0.997	04:32:39	02:22:57
F11	0.291	0.996	04:42:39	02:13:22		F11	-0.358	0.886	08:30:09	10:13:28		F11	-0.465	0.856	08:37:39	09:52:15
G11	0.24	0.999	03:27:39	02:02:39		G11	-0.283	0.598	08:00:09	11:10:56		G11	-0.508	0.696	08:02:39	09:47:56
H11	0.274	0.998	04:12:39	02:07:50		H11	0.285	0.998	04:05:09	02:12:01		H11	0.309	0.998	04:57:39	02:29:20
A12	-0.521	0.895	06:47:39	08:02:46		A12	-0.608	0.864	06:45:09	07:51:42		A12	-0.882	0.937	06:52:39	07:34:22
[truncated: 43 more rows]

[truncated: 1 more sheets: statistical_tests]
