# Supplementary material for: The birth of a bacterial tRNA gene by large-scale, tandem duplication events
Source: eLife. 2020 Oct 30;9:e57947. doi: 10.7554/eLife.57947 (PMC7661048; doi:10.7554/eLife.57947)
Supplement: Figure 2—source data 2. — Raw colony counts are provided, as well as details regarding the calculation of Malthusian parameters and relative fitness, and details of statistical tests used to detect deviations of relative fitness from 1. [file elife-57947-fig2-data2.xlsx]

## Sheet: raw_block1_T0
All competitions in Fig. 2 and Fig. 3 were performed in replicates of six. Competitions 1-13 were each performed as two separate blocks of 3 replicates each (all block 1 competitions were performed in parallel, and all block 2 compeitions were performed in parallel). All replicates of competitions 14-16 were peformed together in block 3, independently of block 1 and block 2.
This worksheet contains the raw colony counts for block 1 competitions at T0
Competitions 1-9 were performed in KB medium; competitions 10-13 in M9 medium
# Competition	Replicate	Strain_1	Strain_1 OD600 (overnight culture)	Strain_2	Strain_2 OD600 (overnight culture)	Strain_1 innoculum volume	Strain_2 innoculum volume	T0 dilution plated	T0 volume plated	Strain_1 CFUs	Strain_2 CFUs	Total CFUs	total_strain1_cfu	total_strain2_cfu	total_volume	Notes
1	1	SBW25-lacZ	1.004	delserCGA-1	0.962	4	4	10^-6	50	40	23	63	139	78	150	Plated after mixing 4 µl of each strain in 4 ml KB in 13 ml tube (i.e., the competition tube)
									100	99	55	154				Counting: Large blue (SBW25-lacZ) vs small white (delserCGA-1) colonies
	2	SBW25-lacZ	1.004	delserCGA-1	0.962	4	4	10^-6	50	64	48	112	185	111	150
									100	121	63	184
	3	SBW25-lacZ	1.004	delserCGA-1	0.962	4	4	10^-6	50	55	32	87	156	93	150
									100	101	61	162
2	1	SBW25-lacZ	1.004	delserCGA-2	0.997	4	4	10^-6	50	37	29	66	132	86	150	Plated after mixing 4 µl of each strain in 4 ml KB in 13 ml tube (i.e., the competition tube)
									100	95	57	152				Counting: Blue (SBW25-lacZ) vs white (delserCGA-2) colonies
	2	SBW25-lacZ	1.004	delserCGA-2	0.997	4	4	10^-6	50	57	29	86	155	78	150
									100	98	49	147
	3	SBW25-lacZ	1.004	delserCGA-2	0.997	4	4	10^-6	50	44	29	73	144	71	150
									100	100	42	142
3	1	deltaSer1	0.962	M1-L	1.034	4	4	10^-6	50	34	47	81	106	113	150	Plated after mixing 4 µl of each strain in 4 ml KB in 13 ml tube (i.e., the competition tube)
									100	72	66	138				Counting: Small (delserCGA-1) vs large (M1-L) colonies
	2	deltaSer1	0.962	M1-L	1.034	4	4	10^-6	50	23	31	54	72	86	150
									100	49	55	104
	3	deltaSer1	0.962	M1-L	1.034	4	4	10^-6	50	38	45	83	98	136	150
									100	60	91	151
4	1*	deltaSer1	0.962	M2-Lop	1.032	4	4	10^-6	50	22	36	58	71	131	150	Plated after mixing 4 µl of each strain in 4 ml KB in 13 ml tube (i.e., the competition tube)
									100	49	95	144				*M2-Lop diluted 1:1 in fresh KB for this competition pair: 100 µl from overnight M2-Lop + 100 µl fresh KB mixed and 4ul of the mixture used as the M2-Lop inoculum
	2*	deltaSer1	0.962	M2-Lop	1.032	4	4	10^-6	50	29	40	69	83	113	150	Counting: Small (delserCGA-1) vs large (M2-Lop) colonies
									100	54	73	127
	3*	deltaSer1	0.962	M2-Lop	1.032	4	4	10^-6	50	12	21	33	58	86	150
									100	46	65	111
5	1	deltaSer1	0.962	M2-L	1.134	4	4	10^-6	50	28	20	48	73	72	150	Plated after mixing 4 µl of each strain in 4 ml KB in 13 ml tube (i.e., the competition tube)
									100	45	52	97				Counting: Small (delserCGA-1) vs large (M2-L) colonies
	2	deltaSer1	0.962	M2-L	1.134	4	4	10^-6	50	12	10	22	74	81	150
									100	62	71	133
	3	deltaSer1	0.962	M2-L	1.134	4	4	10^-6	50	28	34	62	70	97	150
									100	42	63	105
6	1	deltaSer2	0.997	M3-L	1.058	4	4	10^-6	50	15	19	34	57	102	150	Plated after mixing 4 µl of each strain in 4 ml KB in 13 ml tube (i.e., the competition tube)
									100	42	83	125				Counting: Small (delserCGA-2) vs large (M3-L) colonies
	2	deltaSer2	0.997	M3-L	1.058	4	4	10^-6	50	28	84	112	75	169	150
									100	47	85	132
	3	deltaSer2	0.997	M3-L	1.058	4	4	10^-6	50	34	45	79	88	126	150
									100	54	81	135
7	1	deltaSer2	0.997	M4-L	1.051	4	4	10^-6	50	18	16	34	63	61	150	Plated after mixing 4 µl of each strain in 4 ml KB in 13 ml tube (i.e., the competition tube)
									100	45	45	90				Counting: Small (delserCGA-1) vs large (M4-L) colonies
	2	deltaSer2	0.997	M4-L	1.051	4	4	10^-6	50	12	17	29	51	62	150
									100	39	45	84
	3	deltaSer2	0.997	M4-L	1.051	4	4	10^-6	50	17	24	41	63	61	150
									100	46	37	83
8	1	SBW25-lacZ	1.004	M1-L	1.034	4	4	10^-6	50	32	23	55	146	96	150	Plated after mixing 4 µl of each strain in 4 ml KB in 13 ml tube (i.e., the competition tube)
									100	114	73	187				Counting: large blue (SBW25-lacZ) vs small white (M1-L) colonies
	2	SBW25-lacZ	1.004	M1-L	1.034	4	4	10^-6	50	19	21	40	91	64	150
									100	72	43	115
	3	SBW25-lacZ	1.004	M1-L	1.034	4	4	10^-6	50	33	27	60	113	72	150
									100	80	45	125
9	1	SBW25-lacZ	1.004	M4-L	1.051	4	4	10^-6	50	32	19	51	124	80	150	Plated after mixing 4 µl of each strain in 4 ml KB in 13 ml tube (i.e., the competition tube)
									100	92	61	153				Counting: Large blue (SBW25-lacZ) vs small white (M4-L) colonies
	2	SBW25-lacZ	1.004	M4-L	1.051	4	4	10^-6	50	37	17	54	99	83	150
									100	62	66	128
	3	SBW25-lacZ	1.004	M4-L	1.051	4	4	10^-6	50	38	20	58	108	80	150
									100	70	60	130
10	1	SBW25_lacZ	0.36	delserCGA-1	0.351	4	4	10^-5	50	48	36	84	159	104	150	Plated after mixing 4 µl of each strain in 4 ml M9 in 13 ml tube (i.e., the competition tube)
									100	111	68	179				Counting: Blue (SBW25-lacZ) vs white (delserCGA-1) colonies
	2	SBW25_lacZ	0.36	delserCGA-1	0.351	4	4	10^-5	50	58	44	102	178	129	150
									100	120	85	205
	3	SBW25_lacZ	0.36	delserCGA-1	0.351	4	4	10^-5	50	42	39	81	133	135	150
									100	91	96	187
11	1	SBW25_lacZ	0.36	delserCGA-2	0.332	4	4	10^-5	50	41	28	69	119	114	150	Plated after mixing 4 µl of each strain in 4 ml M9 in 13 ml tube (i.e., the competition tube)
									100	78	86	164				Counting: Blue (SBW25-lacZ) vs white (delserCGA-2) colonies
	2	SBW25_lacZ	0.36	delserCGA-2	0.332	4	4	10^-5	50	69	47	116	169	142	150
									100	100	95	195
	3	SBW25_lacZ	0.36	delserCGA-2	0.332	4	4	10^-5	50	51	23	74	150	95	150
									100	99	72	171
12	1	SBW25_lacZ	0.36	M1-L	0.345	4	4	10^-5	50	64	38	102	160	118	150	Plated after mixing 4 µl of each strain in 4 ml M9 in 13 ml tube (i.e., the competition tube)
									100	96	80	176				Counting: Blue (SBW25-lacZ) vs white (M1-L) colonies
	2	SBW25_lacZ	0.36	M1-L	0.345	4	4	10^-5	50	47	39	86	134	116	150
									100	87	77	164
	3	SBW25_lacZ	0.36	M1-L	0.345	4	4	10^-5	50	59	41	100	138	123	150
									100	79	82	161
13	1*	SBW25_lacZ	0.36	M4-L	0.291	4	4	10^-5	50	66	39	105	181	118	150	Plated after mixing 4 µl of each strain in 4 ml M9 in 13 ml tube (i.e., the competition tube)
									100	115	79	194				*SBW25-lacZ diluted 1:1 in fresh M9 for this competition pair. 100 µl from overnight SBW25-lacZ + 100 µl fresh M9 mixed and 4ul of the mixture used as the SBW25-lacZ inoculum
	2*	SBW25_lacZ	0.36	M4-L	0.291	4	4	10^-5	50	58	47	105	155	131	150	Counting: Blue (SBW25-lacZ) vs white (M4-L) colonies
									100	97	84	181
	3*	SBW25_lacZ	0.36	M4-L	0.291	4	4	10^-5	50	74	51	125	177	141	150
									100	103	90	193
												grey=included in final count (up to around 250 colonies in total on the plate: >250 excluded standardly, due to increasing probability of single colonies not being founded by single cells)

## Sheet: raw_block2_T0
All competitions in Fig. 2 and Fig. 3 were performed in replicates of six. Competitions 1-13 were each performed as two separate blocks of 3 replicates each (all block 1 competitions were performed in parallel, and all block 2 compeitions were performed in parallel). All replicates of competitions 14-16 were peformed together in block 3, independently of block 1 and block 2.
This worksheet contains the raw colony counts for block 2 competitions at T0
Competitions 1-9 were performed in KB medium; competitions 10-13 in M9 medium
# Competition	Replicate	Strain_1	Strain_1 OD600 (overnight culture)	Strain_2	Strain_2 OD600 (overnight culture)	Strain_1 innoculum volume	Strain_2 innoculum volume	T0 dilution plated	T0 volume plated	Strain_1 CFUs	Strain_2 CFUs	Total CFUs	total_strain1_cfu	total_strain2_cfu	total_volume	Notes
1	1	SBW25-lacZ	0.961	delserCGA-1	0.922	4	4	10^-6	50	36	23	59	96	78	150	Plated after mixing 4 µl of each strain in 4 ml KB in 13 ml tube (i.e., the competition tube)
									100	60	55	115				Counting: Large blue (SBW25-lacZ) vs small white (delserCGA-1) colonies
	2	SBW25-lacZ	0.961	delserCGA-1	0.922	4	4	10^-6	50	26	18	44	78	63	150
									100	52	45	97
	3	SBW25-lacZ	0.961	delserCGA-1	0.922	4	4	10^-6	50	32	21	53	96	63	150
									100	64	42	106
2	1	SBW25-lacZ	0.961	delserCGA-2	0.864	4	4	10^-6	50	31	15	46	94	55	150	Plated after mixing 4 µl of each strain in 4 ml KB in 13 ml tube (i.e., the competition tube)
									100	63	40	103				Counting: Blue (SBW25-lacZ) vs white (delserCGA-2) colonies
	2	SBW25-lacZ	0.961	delserCGA-2	0.864	4	4	10^-6	50	42	18	60	129	74	150
									100	87	56	143
	3	SBW25-lacZ	0.961	delserCGA-2	0.864	4	4	10^-6	50	31	21	52	111	64	150
									100	80	43	123
3	1	deltaSer1	0.922	M1-L	1.025	4	4	10^-6	50	30	31	61	49	74	150	Plated after mixing 4 µl of each strain in 4 ml KB in 13 ml tube (i.e., the competition tube)
									100	19	43	62				Counting: Small (delserCGA-1) vs large (M1-L) colonies
	2	deltaSer1	0.922	M1-L	1.025	4	4	10^-6	50	11	14	25	49	56	150
									100	38	42	80
	3	deltaSer1	0.922	M1-L	1.025	4	4	10^-6	50	18	34	52	55	99	150
									100	37	65	102
4	1*	deltaSer1	0.922	M2-Lop	0.988	4	4	10^-6	50	20	36	56	72	121	150	Plated after mixing 4 µl of each strain in 4 ml KB in 13 ml tube (i.e., the competition tube)
									100	52	85	137				Counting: Small (delserCGA-1) vs large (M2-Lop) colonies
	2*	deltaSer1	0.922	M2-Lop	0.988	4	4	10^-6	50	21	41	62	73	159	150	*M2-Lop diluted 1:1 in fresh KB for this competition pair: 100 µl from overnight M2-Lop + 100 µl fresh KB mixed and 4ul of the mixture used as the M2-Lop inoculum
									100	52	118	170
	3*	deltaSer1	0.922	M2-Lop	0.988	4	4	10^-6	50	19	38	57	82	140	150
									100	63	102	165
5	1	deltaSer1	0.922	M2-L	0.978	4	4	10^-6	50	13	43	56	42	143	150	Plated after mixing 4 µl of each strain in 4 ml KB in 13 ml tube (i.e., the competition tube)
									100	29	100	129				Counting: Small (delserCGA-1) vs large (M2-L) colonies
	2	deltaSer1	0.922	M2-L	0.978	4	4	10^-6	50	17	35	52	60	126	150
									100	43	91	134
	3	deltaSer1	0.922	M2-L	0.978	4	4	10^-6	50	18	39	57	51	112	150
									100	33	73	106
6	1	deltaSer2	0.864	M3-L	0.962	4	4	10^-6	50	18	30	48	45	84	150	Plated after mixing 4 µl of each strain in 4 ml KB in 13 ml tube (i.e., the competition tube)
									100	27	54	81				Counting: Small (delserCGA-2) vs large (M3-L) colonies
	2	deltaSer2	0.864	M3-L	0.962	4	4	10^-6	50	15	27	42	67	119	150
									100	52	92	144
	3	deltaSer2	0.864	M3-L	0.962	4	4	10^-6	50	26	32	58	67	113	150
									100	41	81	122
7	1	deltaSer2	0.864	M4-L	0.962	4	4	10^-6	50	22	51	73	86	162	150	Plated after mixing 4 µl of each strain in 4 ml KB in 13 ml tube (i.e., the competition tube)
									100	64	111	175				Counting: Small (delserCGA-1) vs large (M4-L) colonies
	2	deltaSer2	0.864	M4-L	0.962	4	4	10^-6	50	14	24	38	57	118	150
									100	43	94	137
	3	deltaSer2	0.864	M4-L	0.962	4	4	10^-6	50	19	31	50	76	137	150
									100	57	106	163
8	1	SBW25-lacZ	0.961	M1-L	1.025	4	4	10^-6	50	22	19	41	79	72	150	Plated after mixing 4 µl of each strain in 4 ml KB in 13 ml tube (i.e., the competition tube)
									100	57	53	110				Counting: large blue (SBW25-lacZ) vs small white (M1-L) colonies
	2	SBW25-lacZ	0.961	M1-L	1.025	4	4	10^-6	50	23	29	52	77	82	150
									100	54	53	107
	3	SBW25-lacZ	0.961	M1-L	1.025	4	4	10^-6	50	19	23	42	69	84	150
									100	50	61	111
9	1	SBW25-lacZ	0.961	M4-L	0.962	4	4	10^-6	50	35	27	62	95	74	150	Plated after mixing 4 µl of each strain in 4 ml KB in 13 ml tube (i.e., the competition tube)
									100	60	47	107				Counting: Large blue (SBW25-lacZ) vs small white (M4-L) colonies
	2	SBW25-lacZ	0.961	M4-L	0.962	4	4	10^-6	50	30	21	51	74	47	150
									100	44	26	70
	3	SBW25-lacZ	0.961	M4-L	0.962	4	4	10^-6	50	22	15	37	74	59	150
									100	52	44	96
10	1	SBW25_lacZ	0.321	delserCGA-1	0.313	4	4	10^-5	50	95	89	184	95	89	50	Plated after mixing 4 µl of each strain in 4 ml M9 in 13 ml tube (i.e., the competition tube)
									100	188	202	390				Counting: Blue (SBW25-lacZ) vs white (delserCGA-1) colonies
	2	SBW25_lacZ	0.321	delserCGA-1	0.313	4	4	10^-5	50	64	69	133	64	69	50
									100	139	134	273
	3	SBW25_lacZ	0.321	delserCGA-1	0.313	4	4	10^-5	50	79	76	155	79	76	50
									100	124	136	260
11	1	SBW25_lacZ	0.321	delserCGA-2	0.337	4	4	10^-5	50	56	86	142	56	86	50	Plated after mixing 4 µl of each strain in 4 ml M9 in 13 ml tube (i.e., the competition tube)
									100	115	182	297				Counting: Blue (SBW25-lacZ) vs white (delserCGA-2) colonies
	2	SBW25_lacZ	0.321	delserCGA-2	0.337	4	4	10^-5	50	92	95	187	92	95	50
									100	161	197	358
	3	SBW25_lacZ	0.321	delserCGA-2	0.337	4	4	10^-5	50	95	77	172	95	77	50
									100	182	136	318
12	1	SBW25_lacZ	0.321	M1-L	0.344	4	4	10^-5	50	56	53	109	50	56	50	Plated after mixing 4 µl of each strain in 4 ml M9 in 13 ml tube (i.e., the competition tube)
									100	139	97	236				Counting: Blue (SBW25-lacZ) vs white (M1-L) colonies
	2	SBW25_lacZ	0.321	M1-L	0.344	4	4	10^-5	50	71	69	140	50	71	50
									100	165	125	290
	3	SBW25_lacZ	0.321	M1-L	0.344	4	4	10^-5	50	80	79	159	80	79	50
									100	164	128	292
13	1*	SBW25_lacZ	0.321	M4-L	0.341	4	4	10^-5	50	69	54	123	69	54	50	Plated after mixing 4 µl of each strain in 4 ml M9 in 13 ml tube (i.e., the competition tube)
									100	137	154	291				Counting: Blue (SBW25-lacZ) vs white (M4-L) colonies
	2*	SBW25_lacZ	0.321	M4-L	0.341	4	4	10^-5	50	71	85	156	71	85	50	*SBW25-lacZ diluted 1:1 in fresh M9 for this competition pair. 100 µl from overnight SBW25-lacZ + 100 µl fresh M9 mixed and 4ul of the mixture used as the SBW25-lacZ inoculum
									100	179	160	339
	3*	SBW25_lacZ	0.321	M4-L	0.341	4	4	10^-5	50	81	90	171	81	90	50
									100	214	197	411
												grey=included in final count (up to around 250 colonies in total on the plate: >250 excluded standardly, due to increasing probability of single colonies not being founded by single cells)

## Sheet: raw_block3_T0
All competitions in Fig. 2 and Fig. 3 were performed in replicates of six. Competitions 1-13 were each performed as two separate blocks of 3 replicates each (all block 1 competitions were performed in parallel, and all block 2 compeitions were performed in parallel). All replicates of competitions 14-16 were peformed together in block 3, independently of block 1 and block 2.
This worksheet contains the raw colony counts for block 3 competitions (all replicates of competitions 14, 15, and 16) at T0
Competitions 14, 15, and 16 were performed in KB medium
# Competition	Replicate	Strain_1	Strain_1 OD600 (overnight culture)	Strain_2	Strain_2 OD600 (overnight culture)	Strain_1 innoculum volume	Strain_2 innoculum volume	T0 dilution plated	T0 volume plated	Strain_1 CFUs	Strain_2 CFUs	Total CFUs	total_strain1_cfu	total_strain2_cfu	total_volume	Notes
14	1	SBW25-lacZ	1.114	M2-Lop	1.231	4	4	10^-6	50	19	14	33	60	50	150	Plated after mixing 4 µl of each strain in 4 ml KB in 13 ml tube (i.e., the competition tube)
									100	41	36	77				Counting: Large blue (SBW25-lacZ) vs large white, often sectored (M2-Lop) colonies
	2	SBW25-lacZ	1.114	M2-Lop	1.231	4	4	10^-6	50	36	28	64	129	96	150
									100	93	68	161
	3	SBW25-lacZ	1.114	M2-Lop	1.231	4	4	10^-6	50	29	23	52	104	82	150
									100	75	59	134
	4	SBW25-lacZ	1.114	M2-Lop	1.231	4	4	10^-6	50	27	24	51	76	59	150
									100	49	35	84
	5	SBW25-lacZ	1.114	M2-Lop	1.231	4	4	10^-6	50	21	19	40	71	56	150
									100	50	37	87
	6	SBW25-lacZ	1.114	M2-Lop	1.231	4	4	10^-6	50	17	13	30	60	44	150
									100	43	31	74
15	1	SBW25-lacZ	1.114	M2-L	1.102	4	4	10^-6	50	27	22	49	77	70	150	Plated after mixing 4 µl of each strain in 4 ml KB in 13 ml tube (i.e., the competition tube)
									100	50	48	98				Counting: Large blue (SBW25-lacZ) vs large white (M2-L) colonies
	2	SBW25-lacZ	1.114	M2-L	1.102	4	4	10^-6	50	22	20	42	69	59	150
									100	47	39	86
	3	SBW25-lacZ	1.114	M2-L	1.102	4	4	10^-6	50	18	14	32	58	47	150
									100	40	33	73
	4	SBW25-lacZ	1.114	M2-L	1.102	4	4	10^-6	50	10	11	21	46	40	150
									100	36	29	65
	5	SBW25-lacZ	1.114	M2-L	1.102	4	4	10^-6	50	25	21	46	87	68	150
									100	62	47	109
	6	SBW25-lacZ	1.114	M2-L	1.102	4	4	10^-6	50	26	22	48	81	68	150
									100	55	46	101
16	1	SBW25-lacZ	1.114	M3-L	1.05	4	4	10^-6	50	11	8	19	41	39	150	Plated after mixing 4 µl of each strain in 4 ml KB in 13 ml tube (i.e., the competition tube)
									100	30	31	61				Counting: Large blue (SBW25-lacZ) vs large white (M3-L) colonies
	2	SBW25-lacZ	1.114	M3-L	1.05	4	4	10^-6	50	26	26	52	77	74	150
									100	51	48	99
	3	SBW25-lacZ	1.114	M3-L	1.05	4	4	10^-6	50	17	15	32	54	48	150
									100	37	33	70
	4	SBW25-lacZ	1.114	M3-L	1.05	4	4	10^-6	50	23	20	43	72	64	150
									100	49	44	93
	5	SBW25-lacZ	1.114	M3-L	1.05	4	4	10^-6	50	19	18	37	64	59	150
									100	45	41	86
	6	SBW25-lacZ	1.114	M3-L	1.05	4	4	10^-6	50	27	29	56	93	91	150
									100	66	62	128
												grey=included in final count (up to around 250 colonies in total on the plate: >250 excluded standardly, due to increasing probability of single colonies not being founded by single cells)

## Sheet: raw_block1_T24
All competitions in Fig. 2 and Fig. 3 were performed in replicates of six. Competitions 1-13 were each performed as two separate blocks of 3 replicates each (all block 1 competitions were performed in parallel, and all block 2 compeitions were performed in parallel). All replicates of competitions 14-16 were peformed together in block 3, independently of block 1 and block 2.
This worksheet contains the raw colony counts for block 1 competitions at T24 hours
Competitions 1-9 were performed in KB medium; competitions 10-13 in M9 medium
# Competition	Replicate	Strain_1	Strain_2	OD600	T24 dilution factor	T24 volume	Strain_1 CFUs	Strain_2 CFUs	Total CFUs	total_strain1_cfu	total_strain2_cfu	total_volume	Notes
1	1	SBW25-lacZ	delserCGA-1	0.663	10^-5	25	51	4	55	135	8	75	Plated after 24h incubating competition tube (4 ml KB in 13 ml tube) at 200 rpm and 28 ˚C
						50	84	4	88				Counting: Large, blue (SBW25-lacZ) vs small white (delserCGA-1) colonies
	2	SBW25-lacZ	delserCGA-1	0.668	10^-5	25	39	3	42	133	16	75
						50	94	13	107
	3	SBW25-lacZ	delserCGA-1	0.635	10^-5	25	46	3	49	115	9	75
						50	69	6	75
2	1	SBW25-lacZ	delserCGA-2	0.672	10^-5	25	30	5	35	124	19	75	Plated after 24h incubating competition tube (4 ml KB in 13 ml tube) at 200 rpm and 28 ˚C
						50	94	14	108				Counting: Large, blue (SBW25-lacZ) vs small white (delserCGA-2) colonies
	2	SBW25-lacZ	delserCGA-2	0.677	10^-5	25	33	1	34	100	11	75
						50	67	10	77
	3	SBW25-lacZ	delserCGA-2	0.67	10^-5	25	38	4	42	114	13	75
						50	76	9	85
3	1	delserCGA-1	M1-L	0.671	10^-5	25	2	36	38	13	122	75	Plated after 24h incubating competition tube (4 ml KB in 13 ml tube) at 200 rpm and 28 ˚C
						50	11	86	97				Counting: small (delserCGA-1) vs large (M1-L) colonies
	2	delserCGA-1	M1-L	0.601	10^-5	25	5	62	67	14	129	75
						50	9	67	76
	3	delserCGA-1	M1-L	0.585	10^-5	25	5	59	64	13	106	75
						50	8	47	55
4	1	delserCGA-1	M2-Lop	0.557	10^-5	25	11	69	80	20	131	75	Plated after 24h incubating competition tube (4 ml KB in 13 ml tube) at 200 rpm and 28 ˚C
						50	9	62	71				Counting: small (delserCGA-1) vs large, sectored (M2-Lop) colonies
	2	delserCGA-1	M2-Lop	0.555	10^-5	25	15	71	86	18	126	75
						50	3	55	58
	3	delserCGA-1	M2-Lop	0.677	10^-5	25	7	70	77	16	123	75
						50	9	53	62
5	1	delserCGA-1	M2-L	0.604	10^-5	25	7	38	45	14	87	75	Plated after 24h incubating competition tube (4 ml KB in 13 ml tube) at 200 rpm and 28 ˚C
						50	7	49	56				Counting: small (delserCGA-1) vs large (M2-L) colonies
	2	delserCGA-1	M2-L	0.684	10^-5	25	4	58	62	13	122	75
						50	9	64	73
	3	delserCGA-1	M2-L	0.689	10^-5	25	10	93	103	13	150	75
						50	3	57	60
6	1	delserCGA-2	M3-L	0.655	10^-5	25	6	65	71	10	121	75	Plated after 24h incubating competition tube (4 ml KB in 13 ml tube) at 200 rpm and 28 ˚C
						50	4	56	60				Counting: small (delserCGA-2) vs large (M3-L) colonies
	2	delserCGA-2	M3-L	0.58	10^-5	25	7	46	53	8	84	75
						50	1	38	39
	3	delserCGA-2	M3-L	0.563	10^-5	25	8	52	60	14	114	75
						50	6	62	68
7	1	delserCGA-2	M4-L	0.605	10^-5	25	1	45	46	12	144	75	Plated after 24h incubating competition tube (4 ml KB in 13 ml tube) at 200 rpm and 28 ˚C
						50	11	99	110				Counting: small (delserCGA-2) vs large (M3-L) colonies
	2	delserCGA-2	M4-L	0.599	10^-5	25	1	51	52	9	117	75
						50	8	66	74
	3	delserCGA-2	M4-L	0.593	10^-5	25	7	70	77	19	157	75
						50	12	87	99
8	1	SBW25-lacZ	M1-L	0.594	10^-5	25	28	15	43	67	49	75	Plated after 24h incubating competition tube (4 ml KB in 13 ml tube) at 200 rpm and 28 ˚C
						50	39	34	73				Counting: Large blue (SBW25-lacZ) vs small white (M1-L) colonies
	2	SBW25-lacZ	M1-L	0.596	10^-5	25	18	17	35	53	59	75
						50	35	42	77
	3	SBW25-lacZ	M1-L	0.539	10^-5	25	19	17	36	53	68	75
						50	34	51	85
9	1	SBW25-lacZ	M4-L	0.61	10^-5	25	46	14	60	104	46	75	Plated after 24h incubating competition tube (4 ml KB in 13 ml tube) at 200 rpm and 28 ˚C
						50	58	32	90				Counting: Large blue (SBW25-lacZ) vs small white (M4-L) colonies
	2	SBW25-lacZ	M4-L	0.615	10^-5	25	27	18	45	89	60	75
						50	62	42	104
	3	SBW25-lacZ	M4-L	0.575	10^-5	25	40	30	70	102	67	75
						50	62	37	99
10	1	SBW25-lacZ	delserCGA-1	0.251	10^-5	50	75	39	114	226	141	150	Plated after 24h incubatingcompetition tube (4 ml M9 in 13 ml tube) at 200 rpm and 28 ˚C
						100	151	102	253				Counting: Blue (SBW25-lacZ) vs white (delserCGA-1) colonies
	2	SBW25-lacZ	delserCGA-1	0.216	10^-5	50	54	26	80	205	98	150
						100	151	72	223
	3	SBW25-lacZ	delserCGA-1	0.218	10^-5	50	58	35	93	147	186	150
						100	89	151	240
11	1	SBW25-lacZ	delserCGA-2	0.228	10^-5	50	68	40	108	221	105	150	Plated after 24h incubatingcompetition tube (4 ml M9 in 13 ml tube) at 200 rpm and 28 ˚C
						100	153	65	218				Counting: Blue (SBW25-lacZ) vs white (delserCGA-2) colonies
	2	SBW25-lacZ	delserCGA-2	0.2	10^-5	50	54	28	82	202	96	150
						100	148	68	216
	3	SBW25-lacZ	delserCGA-2	0.252	10^-5	50	90	50	140	223	142	150
						100	133	92	225
12	1	SBW25-lacZ	M1-L	0.241	10^-5	50	60	71	131	165	187	150	Plated after 24h incubatingcompetition tube (4 ml M9 in 13 ml tube) at 200 rpm and 28 ˚C
						100	105	116	221				Counting: Blue (SBW25-lacZ) vs white (M1-L) colonies
	2	SBW25-lacZ	M1-L	0.272	10^-5	50	56	38	94	167	146	150
						100	111	108	219
	3	SBW25-lacZ	M1-L	0.273	10^-5	50	69	64	133	185	163	150
						100	116	99	215
13	1	SBW25-lacZ	M4-L	0.216	10^-5	50	56	28	84	166	85	150	Plated after 24h incubatingcompetition tube (4 ml M9 in 13 ml tube) at 200 rpm and 28 ˚C
						100	110	57	167				Counting: Blue (SBW25-lacZ) vs white (M4-L) colonies
	2	SBW25-lacZ	M4-L	0.197	10^-5	50	45	30	75	117	93	150
						100	72	63	135
	3	SBW25-lacZ	M4-L	0.203	10^-5	50	43	41	84	138	112	150
						100	95	71	166
									grey=included in final count (up to around 250 colonies in total on the plate: >250 excluded standardly, due to increasing probability of single colonies not being founded by single cells)

## Sheet: raw_block2_T24
All competitions in Fig. 2 and Fig. 3 were performed in replicates of six. Competitions 1-13 were each performed as two separate blocks of 3 replicates each (all block 1 competitions were performed in parallel, and all block 2 compeitions were performed in parallel). All replicates of competitions 14-16 were peformed together in block 3, independently of block 1 and block 2.
This worksheet contains the raw colony counts for block 2 competitions at T24 hours
Competitions 1-9 were performed in KB medium; competitions 10-13 in M9 medium
# Competition	Replicate	Strain_1	Strain_2	OD600	T24 dilution factor	T24 volume	Strain_1 CFUs	Strain_2 CFUs	Total CFUs	total_strain1_cfu	total_strain2_cfu	total_volume	Notes
1	1	SBW25-lacZ	delserCGA-1	0.749	10^-5	25	45	7	52	138	15	75	Plated after 24h incubating competition tube (4 ml KB in 13 ml tube) at 200 rpm and 28 ˚C
						50	93	8	101				Counting: Large, blue (SBW25-lacZ) vs small white (delserCGA-1) colonies
	2	SBW25-lacZ	delserCGA-1	0.716	10^-5	25	51	4	55	136	19	75
						50	85	15	100
	3	SBW25-lacZ	delserCGA-1	0.765	10^-5	25	33	3	36	127	7	75
						50	94	4	98
2	1	SBW25-lacZ	delserCGA-2	0.683	10^-5	25	33	1	34	101	6	75	Plated after 24h incubating competition tube (4 ml KB in 13 ml tube) at 200 rpm and 28 ˚C
						50	68	5	73				Counting: Large, blue (SBW25-lacZ) vs small white (delserCGA-2) colonies
	2	SBW25-lacZ	delserCGA-2	0.701	10^-5	25	46	2	48	118	12	75
						50	72	10	82
	3	SBW25-lacZ	delserCGA-2	0.732	10^-5	25	37	1	38	118	10	75
						50	81	9	90
3	1	delserCGA-1	M1-L	0.789	10^-5	25	3	31	34	14	97	75	Plated after 24h incubating competition tube (4 ml KB in 13 ml tube) at 200 rpm and 28 ˚C
						50	11	66	77				Counting: small (delserCGA-1) vs large (M1-L) colonies
	2	delserCGA-1	M1-L	0.716	10^-5	25	3	25	28	10	62	75
						50	7	37	44
	3	delserCGA-1	M1-L	0.796	10^-5	25	4	24	28	10	80	75
						50	6	56	62
4	1	delserCGA-1	M2-Lop	0.665	10^-5	25	4	37	41	9	87	75	Plated after 24h incubating competition tube (4 ml KB in 13 ml tube) at 200 rpm and 28 ˚C
						50	5	50	55				Counting: small (delserCGA-1) vs large, sectored (M2-Lop) colonies
	2	delserCGA-1	M2-Lop	0.757	10^-5	25	2	34	36	10	102	75
						50	8	68	76
	3	delserCGA-1	M2-Lop	0.604	10^-5	25	2	29	31	7	94	75
						50	5	65	70
5	1	delserCGA-1	M2-L	0.67	10^-5	25	8	38	46	19	99	75	Plated after 24h incubating competition tube (4 ml KB in 13 ml tube) at 200 rpm and 28 ˚C
						50	11	61	72				Counting: small (delserCGA-1) vs large (M2-L) colonies
	2	delserCGA-1	M2-L	0.641	10^-5	25	3	41	44	13	117	75
						50	10	76	86
	3	delserCGA-1	M2-L	0.681	10^-5	25	2	38	40	11	83	75
						50	9	45	54
6	1	delserCGA-2	M3-L	0.603	10^-5	25	6	39	45	18	134	75	Plated after 24h incubating competition tube (4 ml KB in 13 ml tube) at 200 rpm and 28 ˚C
						50	12	95	107				Counting: small (delserCGA-2) vs large (M3-L) colonies
	2	delserCGA-2	M3-L	0.701	10^-5	25	5	46	51	20	120	75
						50	15	74	89
	3	delserCGA-2	M3-L	0.631	10^-5	25	4	36	40	10	87	75
						50	6	51	57
7	1	delserCGA-2	M4-L	0.664	10^-5	25	7	31	38	16	79	75	Plated after 24h incubating competition tube (4 ml KB in 13 ml tube) at 200 rpm and 28 ˚C
						50	9	48	57				Counting: small (delserCGA-2) vs large (M3-L) colonies
	2	delserCGA-2	M4-L	0.605	10^-5	25	2	21	23	10	78	75
						50	8	57	65
	3	delserCGA-2	M4-L	0.629	10^-5	25	1	14	15	8	62	75
						50	7	48	55
8	1	SBW25-lacZ	M1-L	0.69	10^-5	25	27	17	44	80	57	75	Plated after 24h incubating competition tube (4 ml KB in 13 ml tube) at 200 rpm and 28 ˚C
						50	53	40	93				Counting: Large blue (SBW25-lacZ) vs small white (M1-L) colonies
	2	SBW25-lacZ	M1-L	0.585	10^-5	25	23	26	49	86	77	75
						50	63	51	114
	3	SBW25-lacZ	M1-L	0.621	10^-5	25	22	18	40	87	66	75
						50	65	48	113
9	1	SBW25-lacZ	M4-L	0.757	10^-5	25	20	15	35	78	58	75	Plated after 24h incubating competition tube (4 ml KB in 13 ml tube) at 200 rpm and 28 ˚C
						50	58	43	101				Counting: Large blue (SBW25-lacZ) vs small white (M4-L) colonies
	2	SBW25-lacZ	M4-L	0.725	10^-5	25	17	9	26	58	39	75
						50	41	30	71
	3	SBW25-lacZ	M4-L	0.719	10^-5	25	24	17	41	91	66	75
						50	67	49	116
10	1	SBW25-lacZ	delserCGA-1	0.197	10^-5	50	46	27	73	142	87	150	Plated after 24h incubatingcompetition tube (4 ml M9 in 13 ml tube) at 200 rpm and 28 ˚C
						100	96	60	156				Counting: Blue (SBW25-lacZ) vs white (delserCGA-1) colonies
	2	SBW25-lacZ	delserCGA-1	0.178	10^-5	50	38	14	52	114	59	150
						100	76	45	121
	3	SBW25-lacZ	delserCGA-1	0.183	10^-5	50	45	19	64	106	50	150
						100	61	31	92
11	1	SBW25-lacZ	delserCGA-2	0.181	10^-5	50	29	24	53	96	71	150	Plated after 24h incubatingcompetition tube (4 ml M9 in 13 ml tube) at 200 rpm and 28 ˚C
						100	67	47	114				Counting: Blue (SBW25-lacZ) vs white (delserCGA-2) colonies
	2	SBW25-lacZ	delserCGA-2	0.197	10^-5	50	40	37	77	121	87	150
						100	81	50	131
	3	SBW25-lacZ	delserCGA-2	0.179	10^-5	50	43	28	71	134	77	150
						100	91	49	140
12	1	SBW25-lacZ	M1-L	0.189	10^-5	50	49	43	92	145	124	150	Plated after 24h incubatingcompetition tube (4 ml M9 in 13 ml tube) at 200 rpm and 28 ˚C
						100	96	81	177				Counting: Blue (SBW25-lacZ) vs white (M1-L) colonies
	2	SBW25-lacZ	M1-L	0.181	10^-5	50	45	39	84	136	96	150
						100	91	57	148
	3	SBW25-lacZ	M1-L	0.181	10^-5	50	37	29	66	105	76	150
						100	68	47	115
13	1	SBW25-lacZ	M4-L	0.17	10^-5	50	39	26	65	107	75	150	Plated after 24h incubatingcompetition tube (4 ml M9 in 13 ml tube) at 200 rpm and 28 ˚C
						100	68	49	117				Counting: Blue (SBW25-lacZ) vs white (M4-L) colonies
	2	SBW25-lacZ	M4-L	0.179	10^-5	50	41	33	74	120	85	150
						100	79	52	131
	3	SBW25-lacZ	M4-L	0.187	10^-5	50	46	21	67	136	83	150
						100	90	62	152
									grey=included in final count (up to around 250 colonies in total on the plate: >250 excluded standardly, due to increasing probability of single colonies not being founded by single cells)

## Sheet: raw_block3_T24
All competitions in Fig. 2 and Fig. 3 were performed in replicates of six. Competitions 1-13 were each performed as two separate blocks of 3 replicates each (all block 1 competitions were performed in parallel, and all block 2 compeitions were performed in parallel). All replicates of competitions 14-16 were peformed together in block 3, independently of block 1 and block 2.
This worksheet contains the raw colony counts for block 3 competitions (all replicates of competitions 14, 15, and 16) at T0
Competitions 14, 15, and 16 were performed in KB medium
# Competition	Replicate	Strain_1	Strain_1 OD600 (overnight culture)	Strain_2	Strain_2 OD600 (overnight culture)	Strain_1 innoculum volume	Strain_2 innoculum volume	T0 dilution plated	T0 volume plated	Strain_1 CFUs	Strain_2 CFUs	Total CFUs	total_strain1_cfu	total_strain2_cfu	total_volume	Notes
14	1	SBW25-lacZ		M2-Lop		4	4	10^-5	25	35	33	68	98	81	75	Plated after mixing 4 µl of each strain in 4 ml KB in 13 ml tube (i.e., the competition tube)
									50	63	48	111				Counting: Large blue (SBW25-lacZ) vs large white, often sectored (M2-Lop) colonies
	2	SBW25-lacZ		M2-Lop		4	4	10^-5	25	26	11	37	111	44	75
									50	85	33	118
	3	SBW25-lacZ		M2-Lop		4	4	10^-5	25	20	16	36	87	65	75
									50	67	49	116
	4	SBW25-lacZ		M2-Lop		4	4	10^-5	25	23	4	27	127	48	75
									50	104	44	148
	5	SBW25-lacZ		M2-Lop		4	4	10^-5	25	23	9	32	108	49	75
									50	85	40	125
	6	SBW25-lacZ		M2-Lop		4	4	10^-5	25	18	13	31	87	42	75
									50	69	29	98
15	1	SBW25-lacZ		M2-L		4	4	10^-5	25	26	11	37	90	41	75	Plated after mixing 4 µl of each strain in 4 ml KB in 13 ml tube (i.e., the competition tube)
									50	64	30	94				Counting: Large blue (SBW25-lacZ) vs large white (M2-L) colonies
	2	SBW25-lacZ		M2-L		4	4	10^-5	25	39	20	59	103	45	75
									50	64	25	89
	3	SBW25-lacZ		M2-L		4	4	10^-5	25	14	6	20	97	33	75
									50	83	27	110
	4	SBW25-lacZ		M2-L		4	4	10^-5	25	24	4	28	88	24	75
									50	64	20	84
	5	SBW25-lacZ		M2-L		4	4	10^-5	25	14	7	21	80	37	75
									50	66	30	96
	6	SBW25-lacZ		M2-L		4	4	10^-5	25	27	10	37	104	37	75
									50	77	27	104
16	1	SBW25-lacZ		M3-L		4	4	10^-5	25	16	10	26	61	46	75	Plated after mixing 4 µl of each strain in 4 ml KB in 13 ml tube (i.e., the competition tube)
									50	45	36	81				Counting: Large blue (SBW25-lacZ) vs large white (M3-L) colonies
	2	SBW25-lacZ		M3-L		4	4	10^-5	25	34	9	43	90	25	75
									50	56	16	72
	3	SBW25-lacZ		M3-L		4	4	10^-5	25	24	10	34	67	31	75
									50	43	21	64
	4	SBW25-lacZ		M3-L		4	4	10^-5	25	10	7	17	54	27	75
									50	44	20	64
	5	SBW25-lacZ		M3-L		4	4	10^-5	25	13	6	19	36	22	75
									50	23	16	39
	6	SBW25-lacZ		M3-L		4	4	10^-5	25	38	10	48	99	43	75
									50	61	33	94
												grey=included in final count (up to around 250 colonies in total on the plate: >250 excluded standardly, due to increasing probability of single colonies not being founded by single cells)

## Sheet: raw_block3_T24_GA
All competitions in Fig. 2 and Fig. 3 were performed in replicates of six. Competitions 1-13 were each performed as two separate blocks of 3 replicates each (all block 1 competitions were performed in parallel, and all block 2 compeitions were performed in parallel). All replicates of competitions 14-16 were peformed together in block 3, independently of block 1 and block 2.
This worksheet contains the raw colony counts for block 3 competitions (all replicates of competitions 14, 15, and 16) at T0
Competitions 14, 15, and 16 were performed in KB medium
# Competition	Replicate	Strain_1	Strain_2	OD600	T24 dilution factor	T24 volume	Strain_1 CFUs	Strain_2 CFUs	Total CFUs	total_strain1_cfu	total_strain2_cfu	total_volume	Notes
14	1	SBW25-lacZ	M2-Lop	0.589	10^-5	25	35	33	68	98	81	75	Plated after mixing 4 µl of each strain in 4 ml KB in 13 ml tube (i.e., the competition tube)
						50	63	48	111				Counting: Large blue (SBW25-lacZ) vs large white, often sectored (M2-Lop) colonies
	2	SBW25-lacZ	M2-Lop	0.575	10^-5	25	26	11	37	111	44	75
						50	85	33	118
	3	SBW25-lacZ	M2-Lop	0.547	10^-5	25	20	16	36	87	65	75
						50	67	49	116
	4	SBW25-lacZ	M2-Lop	0.542	10^-5	25	23	4	27	127	48	75
						50	104	44	148
	5	SBW25-lacZ	M2-Lop	0.549	10^-5	25	23	9	32	108	49	75
						50	85	40	125
	6	SBW25-lacZ	M2-Lop	0.536	10^-5	25	18	13	31	87	42	75
						50	69	29	98
15	1	SBW25-lacZ	M2-L	0.509	10^-5	25	26	11	37	90	41	75	Plated after mixing 4 µl of each strain in 4 ml KB in 13 ml tube (i.e., the competition tube)
						50	64	30	94				Counting: Large blue (SBW25-lacZ) vs large white (M2-L) colonies
	2	SBW25-lacZ	M2-L	0.527	10^-5	25	39	20	59	103	45	75
						50	64	25	89
	3	SBW25-lacZ	M2-L	0.544	10^-5	25	14	6	20	97	33	75
						50	83	27	110
	4	SBW25-lacZ	M2-L	0.526	10^-5	25	24	4	28	88	24	75
						50	64	20	84
	5	SBW25-lacZ	M2-L	0.503	10^-5	25	14	7	21	80	37	75
						50	66	30	96
	6	SBW25-lacZ	M2-L	0.565	10^-5	25	27	10	37	104	37	75
						50	77	27	104
16	1	SBW25-lacZ	M3-L	0.533	10^-5	25	16	10	26	61	46	75	Plated after mixing 4 µl of each strain in 4 ml KB in 13 ml tube (i.e., the competition tube)
						50	45	36	81				Counting: Large blue (SBW25-lacZ) vs large white (M3-L) colonies
	2	SBW25-lacZ	M3-L	0.556	10^-5	25	34	9	43	90	25	75
						50	56	16	72
	3	SBW25-lacZ	M3-L	0.555	10^-5	25	24	10	34	67	31	75
						50	43	21	64
	4	SBW25-lacZ	M3-L	0.56	10^-5	25	10	7	17	54	27	75
						50	44	20	64
	5	SBW25-lacZ	M3-L	0.538	10^-5	25	13	6	19	36	22	75
						50	23	16	39
	6	SBW25-lacZ	M3-L	0.582	10^-5	25	38	10	48	99	43	75
						50	61	33	94
									grey=included in final count (up to around 250 colonies in total on the plate: >250 excluded standardly, due to increasing probability of single colonies not being founded by single cells)

## Sheet: fitness_calcs
T0 versus T24: fitness calculations
																		All competitions
Competition 1: delserCGA-1 versus SBW25-lacZ in full medium (KB)																		Competition	Medium	Name	Mean RF	SE
		T0				T24				Malthusian parameter		Relative fitness						1	KB	delserCGA-1/SBW25-lacZ	0.62403	0.0239063
block	replicate	dilution	volume	SBW25-lacZ_cfu	delserCGA-1_cfu	dilution	volume	SBW25-lacZ_cfu	delserCGA-1_cfu	SBW25-lacZ	delserCGA-1_cfu	delserCGA-1/SBW25-lacZ	Block_mean	Block_SE	overall_mean	overall_SE		2	KB	delserCGA-2/SBW25-lacZ	0.66763	0.0221992
1	1	3	150	139	78	5	75	135	8	5.26912	3.02105	0.57335	0.614429	0.0316004	0.62403	0.0239063		3	KB	M1-L/delserCGA-1	1.50427	0.0453081
1	2	3	150	185	111	5	75	133	16	4.96831	3.36138	0.676563						4	KB	M2-Lop/delserCGA-1	1.48262	0.0575966
1	3	3	150	156	93	5	75	115	9	4.99339	2.96294	0.593373						5	KB	M2-L/delserCGA-1	1.4172	0.0783493
2	1	3	150	96	78	5	75	138	15	5.66122	3.64966	0.644677	0.63363	0.0420331				6	KB	M3-L/delserCGA-2	1.43981	0.0427619
2	2	3	150	78	63	5	75	136	19	5.85426	4.09962	0.70028						7	KB	M4-L/delserCGA-2	1.49956	0.0672269
2	3	3	150	96	63	5	75	127	7	5.57816	3.10109	0.555935						8	KB	M1-L/SBW25-lacZ	1.01837	0.0374579
																		9	KB	M4-L/SBW25-lacZ	0.974394	0.011961
Competition 2: delserCGA-2 versus SBW25-lacZ in full medium (KB)																		10	M9	delserCGA-1/SBW25-lacZ	0.944308	0.0240989
		T0				T24				Malthusian parameter		Relative fitness						11	M9	delserCGA-2/SBW25-lacZ	0.932775	0.0162751
block	replicate	dilution	volume	SBW25-lacZ_cfu	delserCGA-2_cfu	dilution	volume	SBW25-lacZ_cfu	delserCGA-2_cfu	SBW25-lacZ	delserCGA-2_cfu	delserCGA-2/SBW25-lacZ	Mean	SE	overall_mean	overall_SE		12	M9	M1-L/SBW25-lacZ	0.978122	0.0228416
1	1	3	150	132	86	5	75	124	19	5.2358	3.78841	0.723559	0.707203	0.0106784	0.66763	0.0221992		13	M9	M4-L/SBW25-lacZ	0.979914	0.0260769
1	2	3	150	155	78	5	75	100	11	4.86006	3.3395	0.687132
1	3	3	150	144	71	5	75	114	13	5.0647	3.60059	0.710918						KB versus M9
2	1	3	150	94	55	5	75	101	6	5.37014	3.08274	0.574052	0.628057	0.0279999				Competition	Medium	Name	Mean RF	SE
2	2	3	150	129	74	5	75	118	12	5.20919	3.47916	0.667889						1	KB	delserCGA-1/SBW25-lacZ	0.62403	0.0239063
2	3	3	150	111	64	5	75	118	10	5.35947	3.44202	0.642231						2	KB	delserCGA-2/SBW25-lacZ	0.66763	0.0221992
																		8	KB	M1-L/SBW25-lacZ	1.01837	0.0374579
																		9	KB	M4-L/SBW25-lacZ	0.974394	0.011961
Competition 3: M1-L versus delserCGA-1 in full medium (KB)																		10	M9	delserCGA-1/SBW25-lacZ	0.944308	0.0240989
		T0				T24				Malthusian parameter		Relative fitness						11	M9	delserCGA-2/SBW25-lacZ	0.932775	0.0162751
block	replicate	dilution	volume	delserCGA-1	M1-L_cfu	dilution	volume	delserCGA-1	M1-L_cfu	delserCGA-1	M1-L_cfu	M1-L/delserCGA-1	Mean	SE	overall_mean	overall_SE		12	M9	M1-L/SBW25-lacZ	0.978122	0.0228416
1	1	3	150	106	113	5	75	13	122	3.19983	5.37495	1.67976	1.59268	0.0438501	1.50427	0.0453081		13	M9	M4-L/SBW25-lacZ	0.979914	0.0260769
1	2	3	150	72	86	5	75	14	129	3.66071	5.70378	1.55811
1	3	3	150	98	136	5	75	13	106	3.2783	5.0491	1.54016
2	1	3	150	49	74	5	75	14	97	4.04555	5.56896	1.37656	1.41586	0.0229093
2	2	3	150	49	56	5	75	10	62	3.70908	5.4001	1.45591
2	3	3	150	55	99	5	75	10	80	3.59357	5.08522	1.41509
Competition 4: M2-Lop versus delserCGA-1 in full medium (KB)																		Box plots in R
		T0				T24				Malthusian parameter		Relative fitness						Name	Medium	Strain 1	Strain2	Shapiro	Test	P-value
block	replicate	dilution	volume	delserCGA-1	M2-Lop	dilution	volume	delserCGA-1	M2-Lop	delserCGA-1	M2-Lop	M2-Lop/delserCGA-1	Mean	SE	overall_mean	overall_SE		Engineered (tRNA deletion) strains versus SBW25-lacZ
1	1	3	150	71	131	5	75	20	131	4.03137	5.29832	1.31427	1.38632	0.0366819	1.48262	0.0575966		C1	KB	delserCGA-1	SBW25-lacZ	0.5842	mu<1	9.45x10-6***
1	2	3	150	83	113	5	75	18	126	3.76985	5.40721	1.43433						M10	M9	delserCGA-1	SBW25-lacZ	0.5006	mu<1	0.03441*
1	3	3	150	58	86	5	75	16	123	4.01046	5.65615	1.41035						C2	KB	delserCGA-2	SBW25-lacZ	0.562	mu<1	1.203x10-5***
2	1	3	150	72	121	5	75	9	87	3.21888	4.96843	1.54353	1.57892	0.0772459				M11	M9	delserCGA-2	SBW25-lacZ	0.7233	mu<1	0.00454**
2	2	3	150	73	159	5	75	10	102	3.31044	4.85439	1.46639						Day 13 evolved strains versus engineered deletion strains
2	3	3	150	82	140	5	75	7	94	2.83751	4.89997	1.72686						C3	KB	M1-L	delserCGA-1	0.7815	mu>1	5.105x10-5***
																		C4	KB	M2-Lop	delserCGA-1	0.6412	mu>1	0.0001982***
																		C5	KB	M2-L	delserCGA-1	0.4687	mu>1	0.001564**
Competition 5: M2-L versus delserCGA-1 in full medium (KB)																		C6	KB	M3-L	delserCGA-2	0.04831	mu>1	7.468x10-5***
		T0				T24				Malthusian parameter		Relative fitness						C7	KB	M4-L	delserCGA-2	0.7541	mu>1	0.0003478***
block	replicate	dilution	volume	delserCGA-1	M2-L	dilution	volume	delserCGA-1	M2-L	delserCGA-1	M2-L	M2-L/delserCGA-1	Mean	SE	overall_mean	overall_SE		Day 13 evolved strains versus SBW25-lacZ
1	1	3	150	73	72	5	75	14	87	3.64692	5.48756	1.50471	1.56492	0.0305161	1.4172	0.0783493		C8	KB	M1-L	SBW25-lacZ	0.6738	mu=1	0.6445
1	2	3	150	74	81	5	75	13	122	3.5592	5.70789	1.6037						M12	M9	M1-L	SBW25-lacZ	0.9523	mu=1	0.3821
1	3	3	150	70	97	5	75	13	150	3.61477	5.73424	1.58634						C9	KB	M4-L	SBW25-lacZ	0.8616	mu=1	0.08523
2	1	3	150	42	143	5	75	19	99	4.50509	4.93059	1.09445	1.26949	0.0891188				M13	M9	,M4-L	SBW25-lacZ	0.5907	mu=1	0.4579
2	2	3	150	60	126	5	75	13	117	3.76892	5.22421	1.38613
2	3	3	150	51	112	5	75	11	83	3.76439	4.99866	1.32788
Competition 6: M3-L versus delserCGA-2 in full medium (KB)
		T0				T24				Malthusian parameter		Relative fitness
block	replicate	dilution	volume	delserCGA-2	M3-L	dilution	volume	delserCGA-2	M3-L	delserCGA-2	M3-L	M3-L/delserCGA-2	Mean	SE	overall_mean	overall_SE
1	1	3	150	57	102	5	75	10	121	3.55785	5.46914	1.5372	1.51415	0.0115268	1.43981	0.0427619
1	2	3	150	75	169	5	75	8	84	3.06027	4.59924	1.50289
1	3	3	150	88	126	5	75	14	114	3.46004	5.19823	1.50236
2	1	3	150	45	84	5	75	18	134	4.38203	5.76534	1.31568	1.36548	0.0590276
2	2	3	150	67	119	5	75	20	120	4.08936	5.30669	1.29768
2	3	3	150	67	113	5	75	10	87	3.39621	5.03684	1.48308
Competition 7: M4-L versus delserCGA-2 in full medium (KB)
		T0				T24				Malthusian parameter		Relative fitness
block	replicate	dilution	volume	delserCGA-2 cfu	M4-L_cfu	dilution	volume	delserCGA-2 cfu	M4-L_cfu	delserCGA-2 cfu	M4-L_cfu	M4-L/delserCGA-2	Mean	SE	overall_mean	overall_SE
1	1	3	150	63	61	5	75	12	144	3.64009	6.15726	1.69151	1.62648	0.0523098	1.49956	0.0672269
1	2	3	150	51	62	5	75	9	117	3.56372	5.93336	1.66494
1	3	3	150	63	61	5	75	19	157	4.09962	6.24369	1.52299
2	1	3	150	86	162	5	75	16	79	3.61656	4.58017	1.26644	1.37264	0.0612574
2	2	3	150	57	118	5	75	10	78	3.55785	4.88434	1.37283
2	3	3	150	76	137	5	75	8	62	3.04703	4.50547	1.47865
Competition 8: M1-L versus SBW25-lacZ in full medium (KB)
		T0				T24				Malthusian parameter		Relative fitness
block	replicate	dilution	volume	SBW25-lacZ	M1-L_cfu	dilution	volume	SBW25-lacZ	M1-L_cfu	SBW25-lacZ	M1-L_cfu	M1-L/SBW25-lacZ	Mean	SE	overall_mean	overall_SE
1	1	3	150	146	96	5	75	67	49	4.5194	4.62579	1.02354	1.0914	0.037785	1.01837	0.0374579
1	2	3	150	91	64	5	75	53	59	4.75775	5.21697	1.09652
1	3	3	150	113	72	5	75	53	68	4.54122	5.24116	1.15413
2	1	3	150	79	72	5	75	80	57	5.3109	5.0647	0.953644	0.94535	0.015979
2	2	3	150	77	82	5	75	86	77	5.40886	5.2354	0.967931
2	3	3	150	69	84	5	75	87	66	5.53012	5.05716	0.914475
Competition 9: M4-L versus SBW25-lacZ in full medium (KB)
		T0				T24				Malthusian parameter		Relative fitness
block	replicate	dilution	volume	SBW25-lacZ cfu	M4-L_cfu	dilution	volume	SBW25-lacZ cfu	M4-L_cfu	SBW25-lacZ cfu	M4-L_cfu	M4-L/SBW25-lacZ	Mean	SE	overall_mean	overall_SE
1	1	3	150	124	80	5	75	104	46	5.12243	4.74493	0.926306	0.953795	0.0148053	0.974394	0.011961
1	2	3	150	99	83	5	75	89	60	5.19183	4.97382	0.958009
1	3	3	150	108	80	5	75	102	67	5.24116	5.12098	0.977071
2	1	3	150	95	74	5	75	78	58	5.10115	5.0547	0.990893	0.994993	0.00847366
2	2	3	150	74	47	5	75	58	39	5.0547	5.11173	1.01128
2	3	3	150	74	59	5	75	91	66	5.50511	5.41043	0.982802
Competition 10: delSerCGA-1 versus SBW25-lacZ in minmal medium (M9)
		T0				T24				Malthusian parameter		Relative fitness
block	replicate	dilution	volume	SBW25-lacZ_cfu	delserCGA-1_cfu	dilution	volume	SBW25-lacZ_cfu	delserCGA-1_cfu	SBW25-lacZ_cfu	delserCGA-1_cfu	delserCGA-1/SBW25-lacZ	Mean	SE	overall_mean	overall_SE
1	1	2	150	159	104	5	150	226	141	7.25939	7.21212	0.99349	0.988638	0.0262302	0.944308	0.0240989
1	2	2	150	178	129	5	150	205	98	7.04898	6.63291	0.940974
1	3	2	150	133	135	5	150	147	186	7.00784	7.22823	1.03145
2	1	2	50	95	89	5	150	142	87	6.21109	5.78641	0.931626	0.899979	0.0158326
2	2	2	50	64	69	5	150	114	59	6.38646	5.65257	0.885087
2	3	2	50	79	76	5	150	106	50	6.10313	5.39043	0.883224
Competition 11: SBW25-delSerCGA2 versus SBW25-lacZ in minmal medium (M9)
		T0				T24				Malthusian parameter		Relative fitness
block	replicate	dilution	volume	SBW25-lacZ_cfu	del_Sercga_2_cfu	dilution	volume	SBW25-lacZ_cfu	del_Sercga_2_cfu	SBW25-lacZ	del_Sercga_2	delSerCGA2/SBW25lacZ	Mean	SE	overall_mean	overall_SE
1	1	2	150	119	114	5	150	221	105	7.52679	6.82552	0.906829	0.942384	0.0294098	0.932775	0.0162751
1	2	2	150	169	142	5	150	202	96	7.08612	6.51628	0.919583
1	3	2	150	150	95	5	150	223	142	7.30429	7.30971	1.00074
2	1	2	50	56	86	5	150	96	71	6.34814	5.61748	0.884901	0.923166	0.0191605
2	2	2	50	92	95	5	150	121	87	6.08314	5.72117	0.940496
2	3	2	50	95	77	5	150	134	77	6.15311	5.80914	0.944099
Competition 12: M1-L versus SBW25-lacZ in minimal medium (M9)
		T0				T24				Malthusian parameter		Relative fitness
block	replicate	dilution	volume	SBW25-lacZ cfu	M1-L_cfu	dilution	volume	SBW25-lacZ cfu	M1-L_cfu	SBW25-lacZ cfu	M1-L_cfu	M1-L/SBW25-lacZ	Mean	SE	overall_mean	overall_SE
1	1	2	150	160	118	5	150	165	187	6.93853	7.36818	1.06192	1.02057	0.0206953	0.978122	0.0228416
1	2	2	150	134	116	5	150	167	146	7.12791	7.13777	1.00138
1	3	2	150	138	123	5	150	185	163	7.20086	7.18932	0.998398
2	1	2	50	50	56	5	150	145	124	6.87385	6.60407	0.960753	0.935676	0.0194608
2	2	2	50	50	71	5	150	136	96	6.80977	6.11081	0.897359
2	3	2	50	80	79	5	150	105	76	6.08108	5.77043	0.948916
Competition 13: M4-L versus SBW25-lacZ in minimal medium (M9)
		T0				T24				Malthusian parameter		Relative fitness
block	replicate	dilution	volume	SBW25-lacZ cfu	M4-L_cfu	dilution	volume	SBW25-lacZ cfu	M4-L_cfu	SBW25-lacZ cfu	M4-L_cfu	M4-L/SBW25-lacZ	Mean	SE	overall_mean	overall_SE
1	1	2	150	181	118	5	150	166	85	6.8152	7.36818	1.08114	1.02489	0.0283373	0.979914	0.0260769
1	2	2	150	155	131	5	150	117	93	6.6265	6.56516	0.990742
1	3	2	150	177	141	5	150	138	112	6.65886	6.67749	1.0028
2	1	2	50	69	54	5	150	107	75	6.24787	6.13765	0.982359	0.934935	0.0239569
2	2	2	50	71	85	5	150	120	85	6.33395	5.80914	0.917143
2	3	2	50	81	90	5	150	136	83	6.32735	5.72817	0.905304
Competition 14: M2-Lop versus SBW25-lacZ in KB medium
		T0				T24				Malthusian parameter		Relative fitness
block	replicate	dilution	volume	SBW25-lacZ cfu	M2-Lop_cfu	dilution	volume	SBW25-lacZ cfu	M2-Lop_cfu	SBW25-lacZ cfu	M2-Lop_cfu	M2-Lop/SBW25-lacZ	Mean	SE	overall_mean	overall_SE
3	1	3	150	60	50	5	75	98	81	6.31596	5.82895	0.922891	0.930007	0.0324794	0.915953	0.0171007
3	2	3	150	129	96	5	75	111	44	5.14804	4.51816	0.877647
3	3	3	150	104	82	5	75	87	65	5.11983	5.06599	0.989482
3	4	3	150	76	59	5	75	127	48	5.81177	5.09198	0.87615	0.9019	0.0144829
3	5	3	150	71	56	5	75	108	49	5.71777	5.16479	0.903287
3	6	3	150	60	44	5	75	87	42	5.66988	5.2518	0.926262
Competition 15: M2-L versus SBW25-lacZ in KB medium
		T0				T24				Malthusian parameter		Relative fitness
block	replicate	dilution	volume	SBW25-lacZ cfu	M2-L_cfu	dilution	volume	SBW25-lacZ cfu	M2-L_cfu	SBW25-lacZ cfu	M2-L_cfu	M2-L/SBW25-lacZ	Mean	SE	overall_mean	overall_SE
3	1	3	150	77	70	5	75	90	41	5.53948	5.44427	0.982813	0.905223	0.0398455	0.877555	0.0249012
3	2	3	150	69	59	5	75	103	45	5.69894	5.02744	0.882172
3	3	3	150	58	47	5	75	97	33	5.81259	4.94468	0.850685
3	4	3	150	46	40	5	75	88	24	5.94701	4.78749	0.805025	0.849887	0.0273343
3	5	3	150	87	68	5	75	80	37	5.21444	4.68973	0.899374
3	6	3	150	81	68	5	75	104	37	5.54826	4.68973	0.845261
Competition 16: M3-L versus SBW25-lacZ in KB medium
		T0				T24				Malthusian parameter		Relative fitness
block	replicate	dilution	volume	SBW25-lacZ cfu	M3-L_cfu	dilution	volume	SBW25-lacZ cfu	M3-L_cfu	SBW25-lacZ cfu	M3-L_cfu	M3-L/SBW25-lacZ	Mean	SE	overall_mean	overall_SE
3	1	3	150	41	39	5	75	61	46	6.08455	5.34833	0.879001	0.844343	0.0359598	0.863275	0.0199995
3	2	3	150	77	74	5	75	90	25	5.45432	4.21313	0.772439
3	3	3	150	54	48	5	75	67	31	5.51403	4.8611	0.881589
3	4	3	150	72	64	5	75	54	27	5.01064	4.43527	0.885171	0.882206	0.0186649
3	5	3	150	64	59	5	75	36	22	4.72295	4.31182	0.91295
3	6	3	150	93	91	5	75	99	43	5.36084	4.54866	0.848498
