# Supplementary material for: The birth of a bacterial tRNA gene by large-scale, tandem duplication events
Source: eLife. 2020 Oct 30;9:e57947. doi: 10.7554/eLife.57947 (PMC7661048; doi:10.7554/eLife.57947)
Supplement: Figure 3—source data 1. — Raw absorbance reads are provided for each sample, as well as plots of absorbance over time for each genotype, calculations of maximum growth rate and lag time, and details of statistical tests used to detect differences in growth profiles between genotypes. [file elife-57947-fig3-data1.xlsx]

## Sheet: raw_data
Source data for Figures 3B, 3C, and 3D
This tab contains the raw absorbance reads for the growth curves and Vmax measurements
								Medium	Strain	#reps		Method
								KB	SBW25	6		96 well plate sealed with a BreathEasy membrane.Plate contained 198 ul medium with 2 ul pre-culture (grown in 96-well plate in corresponding medium. Each pre-culture plate was founded by a single colony, grown on KB agar)
Software Version	3.03.14							KB	W1-L	6
								KB	SBW25-eWT	6
Experiment File Path:	E:\20190614_evolexp_kb_JG.xpt							KB	W3-L	6
Protocol File Path:	C:\Users\user\Desktop\Anuradha\gallie_Pf_48h_2.prt							KB	delserCGA-1	6
Plate Number	Plate 1							KB	M1-L	6
Date	2019-06-14							KB	M2-Lop	6
Time	08:07:13							KB	M2-L	6
Reader Type:	Epoch 2							KB	delserCGA-2	6
Reader Serial Number:	1711135							KB	M3-L	6
Reading Type	Reader							KB	M4-L	6
								KB	medium control (KB)	3
Procedure Details								KB	wells inoculated with strains from a different project (x23), or unused due to known evaporation issues (filled with KB regardless; 4 corner wells A1, A12, H1, H12)	27
Plate Type	96 WELL PLATE									96
Eject plate on completion
Set Temperature	Setpoint 26°C, Gradient 1 °C
	Preheat before moving to next step
Start Kinetic	Runtime 48:00:00 (HH:MM:SS), Interval 0:05:00, 577 Reads
Shake	Orbital: 0:05 (MM:SS)
	Frequency: 282 cpm (3 mm)
Read	Absorbance Endpoint
	Full Plate
	Wavelengths: 600
	Read Speed: Normal, Delay: 100 msec, Measurements/Data Point: 8
End Kinetic
600
	Time	T° 600	A1	A2	A3	A4	A5	A6	A7	A8	A9	A10	A11	A12	B1	B2	B3	B4	B5	B6	B7	B8	B9	B10	B11	B12	C1	C2	C3	C4	C5	C6	C7	C8	C9	C10	C11	C12	D1	D2	D3	D4	D5	D6	D7	D8	D9	D10	D11
	00:00:09	25.9	0.103	0.118	0.121	0.112	0.111	0.11	0.118	0.126	0.129	0.124	0.122	0.097	0.121	0.114	0.115	0.101	0.109	0.105	0.11	0.111	0.115	0.12	0.115	0.112	0.128	0.112	0.115	0.113	0.126	0.116	0.116	0.113	0.115	0.122	0.117	0.12	0.133	0.115	0.117	0.115	0.125	0.122	0.111	0.124	0.114	0.108	0.119
	00:05:09	26.1	0.093	0.11	0.117	0.108	0.103	0.105	0.11	0.112	0.124	0.122	0.113	0.092	0.112	0.105	0.109	0.094	0.102	0.098	0.11	0.106	0.108	0.112	0.11	0.109	0.118	0.107	0.109	0.104	0.114	0.113	0.115	0.111	0.112	0.113	0.11	0.11	0.12	0.112	0.107	0.109	0.12	0.118	0.104	0.121	0.115	0.106	0.116
	00:10:09	26.2	0.093	0.11	0.117	0.109	0.103	0.105	0.111	0.13	0.122	0.122	0.113	0.092	0.111	0.104	0.108	0.094	0.102	0.098	0.11	0.105	0.109	0.112	0.111	0.114	0.113	0.107	0.109	0.104	0.119	0.113	0.115	0.111	0.113	0.113	0.111	0.111	0.118	0.113	0.106	0.109	0.119	0.117	0.105	0.123	0.115	0.107	0.117
	00:15:09	26.2	0.093	0.109	0.118	0.111	0.104	0.104	0.111	0.115	0.122	0.12	0.116	0.092	0.111	0.104	0.107	0.095	0.102	0.098	0.11	0.105	0.109	0.112	0.111	0.114	0.114	0.107	0.108	0.103	0.117	0.115	0.115	0.112	0.113	0.116	0.111	0.111	0.118	0.115	0.106	0.109	0.12	0.117	0.105	0.124	0.115	0.107	0.118
	00:20:09	26.3	0.093	0.11	0.118	0.112	0.105	0.105	0.109	0.116	0.122	0.123	0.112	0.092	0.113	0.104	0.107	0.095	0.103	0.098	0.109	0.105	0.109	0.112	0.112	0.117	0.115	0.107	0.109	0.103	0.113	0.113	0.116	0.112	0.112	0.115	0.111	0.112	0.119	0.117	0.106	0.11	0.12	0.117	0.106	0.117	0.116	0.106	0.118
	00:25:09	26.4	0.093	0.11	0.118	0.111	0.106	0.105	0.108	0.113	0.121	0.117	0.117	0.092	0.112	0.105	0.108	0.095	0.103	0.098	0.108	0.105	0.109	0.112	0.112	0.111	0.114	0.107	0.109	0.104	0.116	0.114	0.116	0.111	0.113	0.118	0.111	0.113	0.12	0.116	0.106	0.11	0.119	0.117	0.106	0.122	0.115	0.106	0.117
	00:30:09	26.5	0.093	0.11	0.117	0.11	0.106	0.105	0.109	0.113	0.121	0.117	0.111	0.092	0.112	0.106	0.108	0.095	0.102	0.098	0.108	0.104	0.109	0.112	0.111	0.112	0.114	0.108	0.109	0.104	0.12	0.113	0.115	0.111	0.112	0.113	0.111	0.112	0.12	0.115	0.106	0.11	0.119	0.117	0.106	0.126	0.115	0.106	0.116
	00:35:09	26.5	0.093	0.109	0.116	0.109	0.105	0.104	0.107	0.119	0.12	0.117	0.111	0.092	0.112	0.107	0.107	0.095	0.102	0.097	0.107	0.104	0.109	0.112	0.111	0.121	0.113	0.108	0.109	0.104	0.118	0.113	0.115	0.111	0.112	0.122	0.111	0.112	0.119	0.118	0.106	0.11	0.119	0.116	0.106	0.129	0.115	0.105	0.115
	00:40:09	26.6	0.093	0.108	0.115	0.108	0.104	0.104	0.107	0.123	0.12	0.127	0.117	0.092	0.111	0.106	0.106	0.094	0.102	0.097	0.107	0.103	0.108	0.111	0.111	0.11	0.113	0.107	0.109	0.104	0.12	0.112	0.115	0.11	0.111	0.119	0.11	0.111	0.119	0.118	0.105	0.11	0.119	0.116	0.106	0.13	0.115	0.105	0.114
	00:45:09	26.6	0.093	0.108	0.115	0.108	0.104	0.104	0.107	0.115	0.119	0.124	0.111	0.092	0.111	0.106	0.106	0.094	0.102	0.097	0.106	0.103	0.108	0.111	0.11	0.105	0.112	0.107	0.108	0.103	0.118	0.112	0.115	0.109	0.111	0.116	0.11	0.11	0.118	0.114	0.105	0.109	0.119	0.115	0.106	0.13	0.115	0.105	0.114
	00:50:09	26.7	0.093	0.108	0.115	0.108	0.104	0.104	0.107	0.117	0.118	0.115	0.117	0.093	0.111	0.106	0.106	0.094	0.101	0.097	0.106	0.102	0.108	0.111	0.11	0.105	0.112	0.107	0.108	0.103	0.12	0.112	0.115	0.109	0.11	0.113	0.11	0.11	0.118	0.112	0.105	0.109	0.119	0.115	0.106	0.13	0.115	0.104	0.113
	00:55:09	26.7	0.093	0.108	0.115	0.107	0.104	0.104	0.107	0.12	0.118	0.142	0.115	0.093	0.111	0.106	0.106	0.094	0.101	0.097	0.106	0.102	0.107	0.11	0.109	0.105	0.112	0.107	0.108	0.104	0.121	0.112	0.114	0.109	0.11	0.112	0.109	0.11	0.118	0.111	0.106	0.109	0.119	0.115	0.106	0.129	0.114	0.104	0.113
	01:00:09	26.8	0.093	0.108	0.115	0.107	0.104	0.104	0.107	0.121	0.117	0.14	0.113	0.092	0.111	0.106	0.106	0.094	0.101	0.097	0.105	0.102	0.107	0.11	0.109	0.112	0.113	0.106	0.108	0.104	0.122	0.112	0.114	0.109	0.109	0.112	0.109	0.11	0.119	0.11	0.106	0.109	0.119	0.115	0.106	0.129	0.114	0.104	0.112
	01:05:09	26.8	0.093	0.109	0.116	0.107	0.104	0.104	0.107	0.121	0.117	0.13	0.11	0.092	0.111	0.106	0.106	0.094	0.101	0.097	0.105	0.102	0.107	0.11	0.109	0.111	0.113	0.107	0.108	0.104	0.123	0.112	0.114	0.109	0.109	0.112	0.109	0.109	0.12	0.11	0.106	0.109	0.119	0.115	0.106	0.13	0.114	0.104	0.112
	01:10:09	26.9	0.093	0.109	0.116	0.107	0.104	0.104	0.107	0.121	0.117	0.128	0.11	0.092	0.111	0.107	0.106	0.094	0.101	0.097	0.106	0.102	0.107	0.11	0.109	0.11	0.114	0.107	0.108	0.104	0.123	0.112	0.114	0.109	0.11	0.112	0.108	0.11	0.12	0.11	0.106	0.109	0.119	0.115	0.106	0.13	0.114	0.104	0.113
	01:15:09	27	0.093	0.109	0.116	0.108	0.104	0.104	0.107	0.121	0.116	0.128	0.111	0.092	0.111	0.107	0.107	0.094	0.101	0.097	0.105	0.102	0.107	0.11	0.109	0.11	0.115	0.107	0.108	0.104	0.124	0.113	0.114	0.109	0.109	0.112	0.108	0.11	0.122	0.111	0.106	0.11	0.119	0.115	0.106	0.13	0.114	0.104	0.113
	01:20:09	27.1	0.093	0.109	0.116	0.108	0.104	0.104	0.108	0.122	0.116	0.129	0.111	0.092	0.112	0.107	0.107	0.094	0.101	0.097	0.106	0.102	0.107	0.11	0.109	0.109	0.116	0.107	0.108	0.104	0.125	0.113	0.114	0.109	0.109	0.112	0.109	0.109	0.124	0.111	0.107	0.11	0.119	0.115	0.106	0.131	0.114	0.104	0.113
	01:25:09	27.2	0.093	0.11	0.116	0.108	0.104	0.104	0.108	0.123	0.117	0.129	0.111	0.092	0.112	0.107	0.107	0.094	0.101	0.097	0.106	0.102	0.107	0.11	0.109	0.108	0.118	0.107	0.108	0.104	0.126	0.113	0.114	0.109	0.11	0.112	0.109	0.11	0.127	0.111	0.107	0.111	0.12	0.115	0.106	0.132	0.114	0.104	0.113
	01:30:09	27.2	0.093	0.11	0.117	0.109	0.105	0.105	0.108	0.123	0.117	0.13	0.111	0.092	0.112	0.108	0.108	0.095	0.102	0.097	0.106	0.102	0.108	0.11	0.11	0.108	0.121	0.108	0.109	0.105	0.127	0.113	0.115	0.11	0.11	0.113	0.109	0.11	0.129	0.112	0.108	0.111	0.121	0.115	0.106	0.133	0.114	0.105	0.114
	01:35:09	27.3	0.093	0.112	0.118	0.109	0.105	0.105	0.108	0.124	0.117	0.131	0.111	0.092	0.112	0.108	0.108	0.095	0.102	0.097	0.106	0.103	0.108	0.11	0.11	0.108	0.123	0.108	0.109	0.105	0.128	0.114	0.115	0.11	0.11	0.113	0.11	0.111	0.129	0.112	0.108	0.111	0.121	0.115	0.106	0.133	0.114	0.105	0.114
	01:40:09	27.4	0.093	0.114	0.12	0.11	0.105	0.105	0.109	0.125	0.117	0.132	0.111	0.092	0.113	0.109	0.109	0.095	0.102	0.097	0.107	0.103	0.108	0.111	0.111	0.109	0.124	0.109	0.109	0.105	0.129	0.114	0.115	0.111	0.111	0.113	0.111	0.111	0.126	0.112	0.108	0.112	0.123	0.115	0.106	0.134	0.115	0.105	0.116
	01:45:09	27.5	0.093	0.117	0.122	0.111	0.106	0.106	0.109	0.126	0.117	0.133	0.111	0.092	0.114	0.109	0.11	0.095	0.102	0.097	0.107	0.103	0.108	0.111	0.111	0.109	0.123	0.109	0.11	0.105	0.129	0.114	0.116	0.113	0.112	0.114	0.113	0.113	0.126	0.114	0.109	0.112	0.124	0.115	0.106	0.136	0.115	0.106	0.117
	01:50:09	27.5	0.093	0.119	0.123	0.112	0.106	0.107	0.109	0.128	0.118	0.135	0.111	0.092	0.116	0.11	0.111	0.095	0.103	0.097	0.107	0.104	0.109	0.111	0.112	0.11	0.122	0.109	0.11	0.106	0.131	0.115	0.117	0.114	0.113	0.116	0.114	0.114	0.127	0.115	0.11	0.113	0.125	0.115	0.107	0.137	0.115	0.106	0.117
	01:55:09	27.6	0.093	0.122	0.121	0.114	0.107	0.108	0.11	0.13	0.118	0.136	0.112	0.092	0.117	0.11	0.111	0.095	0.103	0.097	0.108	0.104	0.11	0.112	0.113	0.11	0.121	0.11	0.111	0.106	0.133	0.116	0.118	0.116	0.114	0.117	0.116	0.116	0.128	0.116	0.11	0.114	0.127	0.116	0.107	0.139	0.116	0.107	0.118
	02:00:09	27.7	0.093	0.124	0.121	0.115	0.108	0.109	0.11	0.132	0.119	0.139	0.112	0.092	0.119	0.11	0.113	0.095	0.104	0.097	0.108	0.105	0.111	0.112	0.114	0.111	0.122	0.11	0.112	0.106	0.135	0.116	0.12	0.118	0.116	0.118	0.118	0.117	0.129	0.117	0.111	0.115	0.128	0.116	0.107	0.141	0.117	0.108	0.119
	02:05:09	27.8	0.093	0.125	0.124	0.117	0.11	0.11	0.111	0.134	0.12	0.141	0.114	0.092	0.121	0.111	0.115	0.095	0.105	0.097	0.109	0.106	0.113	0.113	0.117	0.112	0.123	0.112	0.113	0.106	0.137	0.117	0.121	0.12	0.117	0.12	0.119	0.12	0.131	0.118	0.112	0.116	0.13	0.117	0.108	0.144	0.118	0.109	0.12
	02:10:09	27.8	0.093	0.126	0.127	0.12	0.111	0.112	0.112	0.138	0.121	0.144	0.114	0.092	0.124	0.112	0.117	0.096	0.106	0.096	0.11	0.106	0.113	0.113	0.117	0.113	0.124	0.113	0.114	0.107	0.139	0.118	0.123	0.123	0.119	0.122	0.122	0.122	0.132	0.118	0.112	0.117	0.132	0.118	0.108	0.147	0.119	0.111	0.122
	02:15:09	27.8	0.093	0.126	0.128	0.124	0.113	0.114	0.112	0.141	0.123	0.148	0.116	0.092	0.125	0.112	0.12	0.096	0.108	0.097	0.111	0.107	0.116	0.115	0.121	0.114	0.125	0.114	0.115	0.107	0.14	0.12	0.125	0.127	0.122	0.124	0.124	0.124	0.133	0.12	0.113	0.118	0.132	0.119	0.109	0.149	0.12	0.112	0.124
	02:20:09	27.9	0.093	0.127	0.129	0.125	0.115	0.117	0.113	0.145	0.125	0.152	0.117	0.092	0.125	0.113	0.124	0.096	0.109	0.096	0.112	0.108	0.117	0.116	0.124	0.115	0.126	0.115	0.117	0.108	0.14	0.121	0.127	0.129	0.125	0.128	0.125	0.127	0.135	0.121	0.114	0.119	0.131	0.121	0.11	0.153	0.122	0.113	0.127
	02:25:09	28	0.093	0.126	0.131	0.127	0.117	0.119	0.114	0.148	0.127	0.157	0.118	0.092	0.126	0.114	0.127	0.096	0.111	0.096	0.113	0.11	0.12	0.117	0.126	0.116	0.128	0.116	0.12	0.109	0.141	0.123	0.129	0.131	0.128	0.131	0.127	0.129	0.136	0.123	0.115	0.121	0.131	0.122	0.11	0.159	0.123	0.115	0.129
	02:30:09	28	0.093	0.126	0.132	0.129	0.121	0.122	0.115	0.151	0.128	0.164	0.12	0.092	0.129	0.116	0.127	0.097	0.112	0.096	0.115	0.111	0.122	0.118	0.128	0.118	0.129	0.117	0.122	0.109	0.145	0.125	0.132	0.132	0.13	0.133	0.129	0.131	0.138	0.125	0.116	0.125	0.131	0.123	0.111	0.164	0.126	0.117	0.133
	02:35:09	28	0.093	0.128	0.134	0.129	0.125	0.127	0.117	0.151	0.131	0.167	0.122	0.092	0.127	0.117	0.128	0.097	0.115	0.096	0.117	0.112	0.126	0.121	0.13	0.12	0.132	0.119	0.125	0.111	0.15	0.128	0.135	0.131	0.132	0.132	0.13	0.131	0.141	0.127	0.117	0.13	0.132	0.127	0.112	0.167	0.128	0.12	0.134
	02:40:09	28.1	0.093	0.131	0.135	0.129	0.126	0.129	0.118	0.151	0.133	0.169	0.124	0.092	0.131	0.119	0.125	0.097	0.119	0.096	0.12	0.114	0.129	0.123	0.131	0.122	0.134	0.12	0.131	0.111	0.154	0.129	0.137	0.132	0.132	0.133	0.132	0.133	0.144	0.128	0.119	0.13	0.134	0.131	0.113	0.167	0.131	0.124	0.134
	02:45:09	28.1	0.093	0.134	0.136	0.129	0.126	0.128	0.119	0.15	0.136	0.169	0.126	0.092	0.129	0.122	0.124	0.097	0.123	0.096	0.125	0.116	0.131	0.126	0.132	0.124	0.136	0.122	0.131	0.112	0.156	0.13	0.137	0.132	0.131	0.133	0.133	0.135	0.146	0.13	0.12	0.13	0.135	0.136	0.114	0.166	0.133	0.127	0.134
	02:50:09	28.1	0.093	0.137	0.137	0.131	0.125	0.126	0.12	0.153	0.139	0.171	0.127	0.092	0.129	0.124	0.126	0.098	0.124	0.096	0.13	0.118	0.131	0.13	0.132	0.127	0.139	0.124	0.131	0.114	0.16	0.134	0.137	0.134	0.132	0.135	0.136	0.137	0.149	0.132	0.121	0.132	0.138	0.136	0.115	0.167	0.135	0.128	0.137
	02:55:09	28.2	0.093	0.138	0.138	0.132	0.124	0.126	0.122	0.155	0.14	0.173	0.128	0.092	0.131	0.125	0.131	0.098	0.122	0.096	0.131	0.121	0.129	0.134	0.134	0.128	0.141	0.123	0.131	0.115	0.163	0.135	0.137	0.135	0.133	0.137	0.137	0.14	0.152	0.134	0.12	0.132	0.14	0.135	0.116	0.167	0.135	0.127	0.14
	03:00:09	28.2	0.093	0.139	0.14	0.134	0.127	0.129	0.124	0.16	0.14	0.178	0.129	0.092	0.132	0.127	0.134	0.098	0.123	0.096	0.132	0.126	0.13	0.135	0.138	0.13	0.143	0.124	0.131	0.116	0.166	0.136	0.138	0.139	0.136	0.14	0.141	0.142	0.154	0.137	0.12	0.131	0.142	0.134	0.117	0.17	0.136	0.128	0.142
	03:05:09	28.2	0.093	0.143	0.141	0.136	0.128	0.131	0.125	0.162	0.14	0.183	0.129	0.092	0.134	0.129	0.136	0.099	0.124	0.096	0.131	0.129	0.132	0.133	0.139	0.131	0.145	0.126	0.13	0.118	0.17	0.136	0.14	0.141	0.138	0.143	0.142	0.146	0.156	0.139	0.12	0.132	0.144	0.134	0.118	0.172	0.135	0.128	0.144
	03:10:09	28.3	0.093	0.148	0.142	0.138	0.13	0.132	0.127	0.164	0.14	0.185	0.13	0.092	0.135	0.122	0.135	0.1	0.125	0.096	0.13	0.128	0.134	0.133	0.141	0.132	0.147	0.128	0.13	0.12	0.171	0.136	0.141	0.143	0.14	0.144	0.144	0.148	0.158	0.141	0.12	0.134	0.146	0.134	0.12	0.174	0.136	0.129	0.146
	03:15:09	28.3	0.093	0.155	0.144	0.14	0.132	0.136	0.13	0.167	0.142	0.19	0.132	0.092	0.137	0.125	0.139	0.1	0.127	0.096	0.132	0.127	0.137	0.135	0.144	0.134	0.149	0.129	0.131	0.122	0.175	0.137	0.144	0.146	0.143	0.148	0.147	0.149	0.16	0.144	0.121	0.135	0.148	0.134	0.122	0.178	0.138	0.131	0.149
	03:20:09	28.3	0.093	0.156	0.145	0.143	0.136	0.138	0.132	0.17	0.143	0.192	0.133	0.092	0.138	0.128	0.141	0.101	0.127	0.096	0.133	0.127	0.139	0.137	0.147	0.134	0.15	0.131	0.132	0.124	0.177	0.138	0.146	0.148	0.145	0.15	0.149	0.152	0.163	0.146	0.122	0.137	0.149	0.135	0.124	0.18	0.14	0.135	0.152
	03:25:09	28.3	0.093	0.16	0.146	0.145	0.137	0.141	0.134	0.173	0.145	0.2	0.135	0.092	0.14	0.13	0.14	0.102	0.129	0.096	0.136	0.128	0.141	0.14	0.148	0.136	0.153	0.133	0.134	0.125	0.18	0.14	0.149	0.151	0.148	0.153	0.151	0.154	0.166	0.148	0.123	0.138	0.152	0.138	0.125	0.185	0.142	0.136	0.154
	03:30:09	28.3	0.093	0.163	0.148	0.148	0.14	0.143	0.135	0.176	0.147	0.204	0.136	0.092	0.142	0.129	0.146	0.103	0.132	0.096	0.137	0.13	0.143	0.142	0.152	0.137	0.157	0.134	0.135	0.126	0.183	0.141	0.151	0.153	0.15	0.157	0.154	0.156	0.169	0.151	0.124	0.141	0.154	0.139	0.124	0.186	0.143	0.138	0.154
	03:35:09	28.4	0.093	0.166	0.15	0.151	0.144	0.145	0.135	0.179	0.149	0.211	0.137	0.092	0.145	0.132	0.15	0.104	0.134	0.096	0.14	0.132	0.146	0.144	0.155	0.139	0.16	0.136	0.137	0.127	0.186	0.143	0.154	0.156	0.152	0.16	0.158	0.159	0.173	0.153	0.125	0.143	0.156	0.141	0.125	0.19	0.146	0.14	0.156
	03:40:09	28.4	0.093	0.169	0.152	0.155	0.146	0.149	0.136	0.184	0.152	0.217	0.139	0.092	0.147	0.135	0.147	0.105	0.138	0.096	0.142	0.135	0.148	0.147	0.159	0.14	0.164	0.139	0.139	0.127	0.19	0.145	0.157	0.158	0.155	0.164	0.162	0.161	0.177	0.156	0.126	0.146	0.157	0.143	0.125	0.192	0.148	0.142	0.158
	03:45:09	28.4	0.092	0.171	0.154	0.158	0.15	0.149	0.137	0.187	0.154	0.219	0.141	0.092	0.149	0.136	0.149	0.107	0.141	0.096	0.144	0.137	0.15	0.148	0.163	0.142	0.166	0.139	0.141	0.128	0.192	0.146	0.159	0.16	0.157	0.168	0.164	0.164	0.18	0.158	0.126	0.148	0.157	0.145	0.125	0.194	0.15	0.143	0.159
	03:50:09	28.5	0.092	0.174	0.158	0.162	0.15	0.154	0.137	0.195	0.157	0.227	0.144	0.092	0.152	0.139	0.157	0.109	0.143	0.096	0.147	0.139	0.154	0.152	0.167	0.143	0.17	0.141	0.145	0.127	0.196	0.147	0.162	0.165	0.161	0.172	0.173	0.169	0.184	0.16	0.127	0.154	0.158	0.148	0.125	0.197	0.153	0.146	0.163
	03:55:09	28.5	0.093	0.177	0.16	0.167	0.157	0.156	0.137	0.2	0.159	0.232	0.147	0.092	0.155	0.141	0.159	0.111	0.146	0.096	0.15	0.141	0.156	0.154	0.174	0.145	0.174	0.143	0.146	0.128	0.199	0.15	0.163	0.172	0.166	0.175	0.18	0.17	0.188	0.162	0.128	0.157	0.163	0.15	0.125	0.2	0.154	0.148	0.166
	04:00:09	28.5	0.093	0.181	0.163	0.17	0.16	0.159	0.139	0.206	0.161	0.232	0.147	0.092	0.157	0.143	0.162	0.117	0.149	0.096	0.153	0.144	0.158	0.157	0.182	0.147	0.178	0.145	0.149	0.128	0.203	0.153	0.166	0.177	0.167	0.179	0.181	0.174	0.193	0.165	0.129	0.151	0.164	0.152	0.126	0.202	0.157	0.15	0.169
	04:05:09	28.5	0.092	0.186	0.165	0.173	0.164	0.162	0.139	0.212	0.164	0.238	0.15	0.092	0.161	0.146	0.168	0.123	0.152	0.096	0.156	0.147	0.162	0.161	0.181	0.149	0.183	0.147	0.153	0.128	0.206	0.155	0.169	0.175	0.17	0.183	0.182	0.185	0.198	0.168	0.131	0.157	0.165	0.154	0.127	0.211	0.16	0.153	0.173
	04:10:09	28.6	0.093	0.19	0.167	0.175	0.163	0.169	0.14	0.212	0.167	0.243	0.152	0.092	0.164	0.148	0.167	0.123	0.154	0.096	0.159	0.149	0.166	0.165	0.179	0.151	0.188	0.149	0.155	0.128	0.21	0.159	0.171	0.175	0.183	0.187	0.188	0.189	0.203	0.171	0.132	0.16	0.169	0.159	0.128	0.215	0.163	0.157	0.18
	04:15:09	28.6	0.092	0.193	0.172	0.178	0.172	0.174	0.141	0.217	0.169	0.249	0.153	0.092	0.167	0.152	0.172	0.12	0.159	0.096	0.162	0.151	0.167	0.168	0.189	0.154	0.19	0.151	0.157	0.128	0.212	0.162	0.176	0.185	0.183	0.19	0.192	0.194	0.208	0.173	0.133	0.162	0.173	0.159	0.129	0.218	0.163	0.161	0.184
	04:20:09	28.6	0.092	0.195	0.176	0.182	0.17	0.183	0.143	0.223	0.174	0.258	0.157	0.092	0.172	0.153	0.174	0.121	0.158	0.096	0.167	0.154	0.171	0.173	0.195	0.155	0.196	0.155	0.158	0.13	0.217	0.168	0.183	0.187	0.188	0.192	0.198	0.202	0.211	0.177	0.134	0.166	0.176	0.164	0.131	0.225	0.168	0.164	0.188
	04:25:09	28.6	0.093	0.196	0.18	0.188	0.178	0.186	0.144	0.226	0.177	0.262	0.158	0.092	0.176	0.155	0.18	0.123	0.168	0.096	0.167	0.156	0.181	0.183	0.196	0.159	0.202	0.156	0.156	0.13	0.222	0.168	0.188	0.192	0.19	0.196	0.203	0.204	0.215	0.179	0.136	0.167	0.178	0.166	0.132	0.23	0.173	0.17	0.193
	04:30:09	28.6	0.093	0.202	0.185	0.194	0.177	0.19	0.145	0.231	0.182	0.268	0.161	0.092	0.182	0.157	0.187	0.124	0.17	0.096	0.173	0.159	0.188	0.182	0.203	0.159	0.206	0.16	0.159	0.132	0.227	0.182	0.189	0.198	0.195	0.202	0.206	0.206	0.22	0.183	0.137	0.171	0.182	0.172	0.133	0.236	0.17	0.174	0.196
	04:35:09	28.6	0.092	0.206	0.19	0.196	0.181	0.185	0.147	0.235	0.187	0.272	0.163	0.092	0.185	0.158	0.191	0.124	0.173	0.096	0.18	0.162	0.191	0.19	0.207	0.165	0.21	0.161	0.162	0.133	0.231	0.173	0.191	0.202	0.196	0.207	0.209	0.211	0.224	0.185	0.138	0.174	0.186	0.175	0.135	0.24	0.179	0.176	0.199
	04:40:09	28.6	0.092	0.211	0.196	0.2	0.187	0.189	0.149	0.241	0.194	0.277	0.165	0.092	0.19	0.161	0.197	0.126	0.174	0.096	0.183	0.167	0.195	0.196	0.214	0.165	0.215	0.165	0.168	0.133	0.238	0.178	0.196	0.207	0.2	0.212	0.216	0.217	0.248	0.19	0.141	0.178	0.191	0.178	0.136	0.243	0.185	0.18	0.203
	04:45:09	28.6	0.092	0.213	0.197	0.203	0.189	0.194	0.15	0.246	0.199	0.282	0.165	0.092	0.193	0.163	0.2	0.126	0.175	0.096	0.187	0.17	0.201	0.198	0.218	0.165	0.219	0.167	0.173	0.135	0.242	0.18	0.199	0.212	0.204	0.219	0.222	0.224	0.237	0.195	0.142	0.181	0.196	0.182	0.139	0.25	0.191	0.186	0.205
	04:50:09	28.6	0.092	0.221	0.203	0.206	0.196	0.198	0.152	0.251	0.204	0.286	0.169	0.092	0.197	0.168	0.204	0.129	0.179	0.096	0.189	0.175	0.202	0.202	0.223	0.168	0.222	0.171	0.178	0.137	0.248	0.181	0.204	0.217	0.209	0.224	0.228	0.23	0.267	0.2	0.144	0.185	0.201	0.186	0.139	0.254	0.19	0.187	0.209
	04:55:09	28.7	0.092	0.227	0.209	0.214	0.202	0.204	0.155	0.255	0.207	0.292	0.171	0.092	0.201	0.171	0.208	0.131	0.183	0.096	0.194	0.176	0.203	0.205	0.23	0.17	0.229	0.173	0.183	0.138	0.254	0.185	0.21	0.225	0.216	0.23	0.234	0.236	0.251	0.204	0.144	0.189	0.206	0.191	0.141	0.258	0.191	0.189	0.213
	05:00:09	28.7	0.092	0.234	0.215	0.22	0.207	0.209	0.156	0.261	0.214	0.297	0.173	0.092	0.205	0.176	0.216	0.134	0.188	0.096	0.198	0.191	0.21	0.205	0.237	0.173	0.235	0.176	0.188	0.139	0.258	0.197	0.219	0.232	0.221	0.236	0.241	0.241	0.261	0.209	0.146	0.194	0.211	0.196	0.143	0.261	0.195	0.193	0.219
	05:05:09	28.7	0.092	0.238	0.22	0.225	0.212	0.216	0.158	0.266	0.216	0.301	0.175	0.092	0.211	0.18	0.217	0.137	0.193	0.096	0.203	0.192	0.216	0.208	0.244	0.176	0.238	0.18	0.19	0.141	0.262	0.198	0.224	0.239	0.226	0.243	0.248	0.25	0.256	0.214	0.148	0.201	0.215	0.201	0.145	0.266	0.199	0.199	0.224
	05:10:09	28.7	0.092	0.245	0.226	0.229	0.217	0.221	0.161	0.273	0.22	0.305	0.178	0.092	0.217	0.184	0.222	0.141	0.199	0.096	0.208	0.194	0.223	0.215	0.252	0.176	0.245	0.185	0.194	0.142	0.266	0.204	0.229	0.245	0.232	0.25	0.255	0.258	0.262	0.219	0.151	0.204	0.221	0.205	0.146	0.269	0.205	0.206	0.228
	05:15:09	28.7	0.092	0.251	0.233	0.236	0.222	0.228	0.162	0.28	0.225	0.311	0.182	0.092	0.218	0.188	0.227	0.145	0.207	0.096	0.213	0.197	0.228	0.222	0.26	0.18	0.252	0.189	0.198	0.144	0.271	0.207	0.234	0.253	0.239	0.258	0.262	0.264	0.273	0.224	0.152	0.21	0.225	0.209	0.147	0.273	0.211	0.212	0.234
	05:20:09	28.7	0.092	0.257	0.238	0.242	0.229	0.234	0.165	0.287	0.229	0.316	0.184	0.092	0.226	0.193	0.232	0.149	0.212	0.096	0.218	0.2	0.234	0.228	0.266	0.183	0.265	0.194	0.204	0.146	0.275	0.214	0.238	0.259	0.246	0.265	0.268	0.27	0.293	0.228	0.155	0.216	0.226	0.213	0.151	0.276	0.215	0.218	0.24
	05:25:09	28.7	0.092	0.263	0.244	0.247	0.235	0.24	0.166	0.294	0.233	0.32	0.187	0.092	0.226	0.196	0.238	0.152	0.216	0.096	0.223	0.206	0.24	0.235	0.272	0.185	0.273	0.2	0.209	0.148	0.279	0.219	0.242	0.265	0.254	0.272	0.277	0.278	0.308	0.233	0.156	0.221	0.242	0.218	0.152	0.279	0.22	0.223	0.246
	05:30:09	28.7	0.092	0.272	0.251	0.255	0.242	0.248	0.169	0.3	0.239	0.32	0.191	0.092	0.236	0.2	0.246	0.153	0.222	0.096	0.229	0.211	0.247	0.243	0.28	0.189	0.286	0.205	0.212	0.15	0.284	0.224	0.249	0.272	0.26	0.279	0.29	0.288	0.358	0.237	0.159	0.226	0.24	0.222	0.154	0.283	0.225	0.23	0.255
	05:35:09	28.7	0.092	0.282	0.259	0.267	0.249	0.255	0.172	0.305	0.246	0.322	0.194	0.092	0.239	0.203	0.252	0.155	0.228	0.096	0.234	0.218	0.255	0.25	0.289	0.192	0.304	0.209	0.216	0.151	0.289	0.229	0.256	0.28	0.264	0.286	0.304	0.326	0.427	0.241	0.161	0.229	0.242	0.227	0.155	0.287	0.23	0.236	0.262
	05:40:09	28.7	0.092	0.305	0.264	0.278	0.256	0.262	0.174	0.311	0.252	0.324	0.197	0.092	0.246	0.206	0.26	0.157	0.235	0.096	0.239	0.222	0.261	0.257	0.305	0.196	0.327	0.212	0.222	0.153	0.293	0.234	0.265	0.294	0.27	0.299	0.356	0.387	0.463	0.246	0.164	0.233	0.248	0.23	0.156	0.29	0.234	0.242	0.27
	05:45:08	28.7	0.092	0.35	0.271	0.294	0.262	0.269	0.177	0.316	0.259	0.323	0.2	0.092	0.251	0.209	0.268	0.16	0.242	0.096	0.245	0.229	0.266	0.263	0.359	0.2	0.365	0.218	0.227	0.155	0.298	0.24	0.275	0.312	0.278	0.313	0.405	0.389	0.485	0.253	0.165	0.239	0.256	0.234	0.161	0.292	0.239	0.248	0.277
	05:50:09	28.7	0.092	0.42	0.278	0.309	0.27	0.278	0.18	0.34	0.265	0.328	0.205	0.092	0.258	0.214	0.283	0.163	0.247	0.096	0.253	0.235	0.271	0.269	0.439	0.204	0.405	0.222	0.233	0.157	0.304	0.244	0.282	0.377	0.293	0.346	0.412	0.392	0.485	0.264	0.168	0.244	0.262	0.239	0.163	0.294	0.243	0.255	0.285
	05:55:09	28.7	0.092	0.467	0.284	0.35	0.28	0.292	0.183	0.377	0.272	0.345	0.208	0.092	0.267	0.218	0.302	0.166	0.252	0.096	0.262	0.242	0.279	0.274	0.417	0.207	0.466	0.227	0.239	0.16	0.309	0.251	0.291	0.398	0.321	0.373	0.401	0.422	0.48	0.286	0.171	0.251	0.268	0.244	0.164	0.296	0.247	0.261	0.299
	06:00:09	28.7	0.092	0.465	0.293	0.451	0.299	0.313	0.186	0.394	0.281	0.391	0.211	0.092	0.278	0.223	0.34	0.17	0.258	0.095	0.272	0.249	0.291	0.282	0.425	0.211	0.442	0.229	0.249	0.162	0.313	0.253	0.303	0.413	0.393	0.404	0.432	0.424	0.468	0.31	0.172	0.259	0.274	0.25	0.166	0.298	0.252	0.268	0.319
	06:05:09	28.7	0.092	0.472	0.314	0.464	0.331	0.391	0.19	0.419	0.288	0.417	0.216	0.092	0.292	0.229	0.411	0.174	0.268	0.095	0.276	0.257	0.308	0.293	0.427	0.213	0.452	0.235	0.258	0.164	0.315	0.258	0.315	0.452	0.397	0.428	0.465	0.461	0.489	0.337	0.176	0.269	0.283	0.257	0.17	0.3	0.257	0.278	0.383
	06:10:09	28.7	0.092	0.48	0.414	0.437	0.387	0.425	0.194	0.393	0.295	0.451	0.22	0.092	0.304	0.234	0.459	0.18	0.281	0.096	0.282	0.263	0.365	0.311	0.467	0.218	0.479	0.242	0.265	0.167	0.32	0.262	0.368	0.45	0.421	0.442	0.453	0.462	0.493	0.387	0.17	0.285	0.295	0.265	0.171	0.307	0.264	0.296	0.421
	06:15:09	28.7	0.092	0.495	0.412	0.47	0.488	0.451	0.198	0.437	0.303	0.462	0.227	0.092	0.322	0.238	0.461	0.184	0.298	0.095	0.293	0.269	0.427	0.392	0.463	0.222	0.488	0.248	0.275	0.169	0.323	0.269	0.433	0.467	0.415	0.444	0.472	0.462	0.5	0.427	0.177	0.309	0.312	0.275	0.174	0.358	0.275	0.34	0.421
	06:20:09	28.7	0.092	0.475	0.437	0.457	0.465	0.45	0.201	0.449	0.312	0.467	0.231	0.092	0.366	0.242	0.45	0.19	0.352	0.095	0.308	0.275	0.423	0.423	0.47	0.226	0.482	0.256	0.288	0.171	0.325	0.273	0.421	0.478	0.452	0.465	0.478	0.47	0.5	0.43	0.181	0.346	0.328	0.29	0.175	0.378	0.349	0.393	0.43
	06:25:09	28.7	0.092	0.491	0.456	0.459	0.489	0.45	0.204	0.474	0.344	0.473	0.234	0.092	0.44	0.249	0.467	0.194	0.465	0.096	0.361	0.284	0.453	0.414	0.477	0.23	0.485	0.267	0.3	0.174	0.348	0.28	0.449	0.486	0.467	0.473	0.476	0.476	0.506	0.456	0.183	0.407	0.368	0.307	0.177	0.402	0.348	0.421	0.43
	06:30:09	28.7	0.092	0.492	0.458	0.474	0.454	0.47	0.208	0.479	0.392	0.474	0.239	0.092	0.463	0.26	0.469	0.2	0.444	0.095	0.405	0.3	0.467	0.428	0.482	0.232	0.498	0.285	0.353	0.177	0.382	0.287	0.425	0.492	0.47	0.48	0.483	0.48	0.505	0.466	0.186	0.456	0.425	0.323	0.18	0.41	0.38	0.441	0.453
	06:35:09	28.7	0.092	0.485	0.46	0.47	0.469	0.477	0.212	0.479	0.405	0.479	0.247	0.092	0.424	0.274	0.478	0.206	0.479	0.095	0.424	0.328	0.46	0.451	0.486	0.234	0.495	0.308	0.381	0.179	0.412	0.297	0.457	0.498	0.481	0.486	0.487	0.481	0.503	0.452	0.188	0.481	0.426	0.366	0.181	0.444	0.388	0.44	0.464
	06:40:09	28.7	0.092	0.498	0.47	0.474	0.477	0.481	0.217	0.479	0.401	0.475	0.252	0.092	0.444	0.327	0.483	0.212	0.448	0.095	0.416	0.389	0.472	0.46	0.489	0.235	0.5	0.338	0.411	0.182	0.412	0.305	0.474	0.497	0.486	0.484	0.489	0.485	0.506	0.458	0.192	0.466	0.437	0.408	0.185	0.442	0.416	0.441	0.474
	06:45:09	28.7	0.092	0.485	0.476	0.475	0.482	0.482	0.22	0.477	0.434	0.474	0.308	0.092	0.453	0.409	0.486	0.218	0.457	0.095	0.461	0.419	0.476	0.464	0.486	0.267	0.506	0.384	0.398	0.184	0.431	0.315	0.48	0.493	0.484	0.485	0.487	0.486	0.511	0.474	0.195	0.451	0.431	0.412	0.189	0.457	0.431	0.452	0.475
	06:50:08	28.7	0.092	0.494	0.474	0.472	0.483	0.496	0.224	0.48	0.44	0.475	0.301	0.092	0.465	0.445	0.482	0.224	0.474	0.095	0.459	0.422	0.485	0.475	0.488	0.28	0.502	0.423	0.425	0.187	0.443	0.325	0.49	0.493	0.486	0.485	0.487	0.489	0.516	0.476	0.198	0.459	0.45	0.43	0.192	0.469	0.446	0.468	0.479
	06:55:09	28.8	0.092	0.5	0.476	0.474	0.492	0.49	0.228	0.479	0.448	0.475	0.337	0.092	0.452	0.456	0.492	0.229	0.474	0.095	0.467	0.452	0.487	0.48	0.486	0.31	0.497	0.44	0.44	0.19	0.446	0.335	0.483	0.492	0.487	0.483	0.486	0.49	0.518	0.481	0.202	0.462	0.454	0.423	0.192	0.467	0.457	0.472	0.479
	07:00:09	28.8	0.092	0.496	0.478	0.478	0.488	0.496	0.232	0.478	0.459	0.475	0.353	0.092	0.464	0.418	0.496	0.235	0.482	0.095	0.494	0.461	0.49	0.488	0.488	0.339	0.497	0.491	0.456	0.194	0.463	0.354	0.483	0.492	0.486	0.485	0.486	0.492	0.518	0.48	0.206	0.467	0.462	0.438	0.196	0.47	0.457	0.479	0.481
	07:05:09	28.8	0.092	0.498	0.48	0.48	0.5	0.493	0.236	0.479	0.462	0.477	0.378	0.092	0.48	0.455	0.497	0.242	0.486	0.095	0.497	0.494	0.496	0.494	0.487	0.369	0.499	0.472	0.45	0.197	0.463	0.365	0.484	0.492	0.485	0.485	0.486	0.493	0.519	0.488	0.21	0.475	0.466	0.461	0.2	0.466	0.458	0.481	0.482
	07:10:09	28.8	0.092	0.502	0.48	0.481	0.5	0.494	0.238	0.482	0.464	0.478	0.371	0.092	0.478	0.458	0.5	0.248	0.491	0.095	0.489	0.491	0.492	0.489	0.486	0.382	0.501	0.467	0.463	0.201	0.465	0.374	0.487	0.491	0.484	0.484	0.486	0.496	0.525	0.485	0.214	0.488	0.476	0.462	0.202	0.465	0.461	0.485	0.484
	07:15:09	28.8	0.092	0.504	0.481	0.48	0.498	0.492	0.242	0.48	0.471	0.477	0.386	0.092	0.479	0.441	0.498	0.257	0.494	0.095	0.492	0.498	0.492	0.489	0.486	0.394	0.502	0.455	0.467	0.206	0.466	0.385	0.486	0.49	0.483	0.485	0.485	0.496	0.522	0.492	0.218	0.485	0.475	0.466	0.205	0.463	0.461	0.484	0.483
	07:20:09	28.8	0.092	0.502	0.482	0.479	0.502	0.492	0.245	0.481	0.469	0.478	0.396	0.092	0.473	0.443	0.498	0.269	0.491	0.095	0.495	0.5	0.49	0.489	0.486	0.398	0.504	0.468	0.467	0.21	0.466	0.398	0.487	0.491	0.484	0.486	0.485	0.496	0.522	0.493	0.222	0.482	0.477	0.464	0.208	0.462	0.463	0.484	0.483
	07:25:09	28.8	0.092	0.505	0.482	0.481	0.501	0.489	0.248	0.481	0.47	0.478	0.399	0.092	0.473	0.465	0.498	0.286	0.493	0.095	0.494	0.502	0.49	0.487	0.484	0.407	0.504	0.48	0.464	0.215	0.467	0.423	0.487	0.492	0.483	0.486	0.484	0.494	0.523	0.492	0.226	0.486	0.483	0.465	0.213	0.462	0.464	0.482	0.484
	07:30:09	28.8	0.092	0.505	0.483	0.48	0.5	0.489	0.252	0.482	0.472	0.478	0.398	0.092	0.473	0.454	0.497	0.307	0.491	0.095	0.496	0.502	0.488	0.488	0.486	0.401	0.501	0.475	0.463	0.218	0.467	0.444	0.487	0.493	0.482	0.487	0.483	0.495	0.521	0.492	0.23	0.487	0.484	0.465	0.217	0.46	0.461	0.481	0.483
	07:35:09	28.8	0.092	0.507	0.484	0.482	0.503	0.49	0.253	0.484	0.473	0.48	0.403	0.092	0.472	0.459	0.498	0.358	0.492	0.095	0.496	0.508	0.49	0.488	0.486	0.41	0.503	0.482	0.464	0.219	0.468	0.469	0.489	0.495	0.484	0.49	0.484	0.496	0.52	0.494	0.234	0.489	0.483	0.467	0.221	0.462	0.462	0.482	0.483
	07:40:09	28.8	0.092	0.507	0.486	0.481	0.502	0.487	0.305	0.484	0.473	0.479	0.402	0.092	0.473	0.461	0.499	0.44	0.491	0.095	0.497	0.502	0.487	0.486	0.484	0.407	0.503	0.483	0.463	0.222	0.469	0.493	0.488	0.495	0.484	0.49	0.484	0.494	0.52	0.498	0.238	0.49	0.485	0.469	0.225	0.463	0.461	0.481	0.484
	07:45:09	28.8	0.092	0.507	0.486	0.48	0.5	0.484	0.328	0.484	0.472	0.479	0.4	0.092	0.475	0.463	0.497	0.47	0.489	0.095	0.495	0.503	0.485	0.486	0.484	0.407	0.503	0.476	0.463	0.225	0.468	0.511	0.489	0.494	0.484	0.49	0.483	0.495	0.52	0.5	0.245	0.49	0.485	0.467	0.228	0.462	0.461	0.479	0.484
	07:50:09	28.8	0.092	0.509	0.486	0.481	0.502	0.486	0.335	0.484	0.473	0.48	0.404	0.092	0.477	0.457	0.496	0.433	0.489	0.095	0.498	0.503	0.488	0.487	0.486	0.409	0.504	0.488	0.465	0.23	0.47	0.523	0.491	0.495	0.484	0.492	0.485	0.498	0.52	0.501	0.286	0.49	0.487	0.47	0.232	0.463	0.462	0.478	0.483
	07:55:09	28.8	0.092	0.511	0.488	0.482	0.502	0.488	0.374	0.485	0.473	0.481	0.404	0.092	0.478	0.459	0.498	0.489	0.489	0.095	0.497	0.502	0.487	0.488	0.484	0.409	0.505	0.488	0.464	0.234	0.47	0.55	0.491	0.496	0.486	0.493	0.486	0.499	0.52	0.499	0.32	0.492	0.487	0.469	0.236	0.465	0.463	0.477	0.482
	08:00:09	28.8	0.092	0.511	0.489	0.483	0.501	0.487	0.38	0.487	0.473	0.483	0.407	0.092	0.479	0.46	0.499	0.468	0.487	0.095	0.498	0.501	0.487	0.487	0.485	0.41	0.505	0.489	0.462	0.242	0.47	0.583	0.492	0.497	0.485	0.494	0.488	0.501	0.52	0.5	0.339	0.492	0.487	0.469	0.241	0.466	0.463	0.476	0.482
	08:05:09	28.9	0.092	0.509	0.492	0.484	0.5	0.486	0.409	0.484	0.474	0.482	0.405	0.092	0.478	0.462	0.496	0.464	0.486	0.095	0.498	0.498	0.486	0.487	0.486	0.412	0.504	0.488	0.46	0.298	0.471	0.6	0.492	0.496	0.486	0.496	0.488	0.501	0.521	0.501	0.368	0.494	0.488	0.468	0.296	0.466	0.464	0.475	0.482
	08:10:09	28.9	0.092	0.509	0.491	0.485	0.501	0.485	0.407	0.485	0.471	0.482	0.405	0.092	0.478	0.466	0.494	0.473	0.484	0.095	0.499	0.497	0.486	0.486	0.485	0.411	0.505	0.489	0.462	0.322	0.471	0.614	0.493	0.497	0.486	0.497	0.489	0.5	0.521	0.502	0.355	0.494	0.488	0.468	0.297	0.468	0.464	0.475	0.482
	08:15:09	28.9	0.092	0.51	0.493	0.486	0.498	0.485	0.408	0.487	0.474	0.482	0.406	0.092	0.478	0.462	0.493	0.474	0.483	0.095	0.499	0.495	0.487	0.487	0.485	0.412	0.505	0.491	0.463	0.335	0.472	0.651	0.496	0.497	0.487	0.498	0.492	0.501	0.521	0.504	0.398	0.496	0.488	0.465	0.339	0.469	0.464	0.475	0.482
	08:20:09	28.9	0.092	0.51	0.493	0.487	0.499	0.485	0.41	0.488	0.475	0.483	0.409	0.092	0.478	0.463	0.49	0.489	0.482	0.095	0.5	0.496	0.488	0.487	0.487	0.412	0.505	0.487	0.463	0.335	0.473	0.677	0.495	0.498	0.487	0.499	0.492	0.502	0.522	0.504	0.395	0.496	0.489	0.465	0.356	0.471	0.466	0.476	0.481
	08:25:09	28.9	0.092	0.51	0.494	0.486	0.499	0.485	0.411	0.488	0.475	0.484	0.41	0.092	0.477	0.468	0.491	0.492	0.482	0.095	0.503	0.495	0.489	0.486	0.487	0.412	0.506	0.49	0.464	0.367	0.475	0.697	0.496	0.5	0.488	0.5	0.493	0.504	0.522	0.505	0.396	0.497	0.488	0.462	0.378	0.471	0.467	0.478	0.483
	08:30:09	28.9	0.092	0.511	0.496	0.486	0.498	0.487	0.416	0.489	0.474	0.486	0.411	0.092	0.477	0.464	0.49	0.487	0.483	0.095	0.503	0.495	0.49	0.488	0.489	0.416	0.506	0.493	0.465	0.388	0.476	0.727	0.497	0.5	0.49	0.503	0.495	0.506	0.522	0.506	0.407	0.499	0.488	0.461	0.375	0.472	0.468	0.478	0.484
	08:35:09	28.9	0.092	0.511	0.497	0.489	0.497	0.488	0.419	0.49	0.476	0.488	0.415	0.092	0.479	0.468	0.49	0.495	0.482	0.095	0.504	0.497	0.492	0.488	0.492	0.417	0.508	0.494	0.466	0.382	0.478	0.747	0.497	0.501	0.489	0.504	0.497	0.508	0.522	0.508	0.408	0.5	0.488	0.46	0.389	0.472	0.468	0.479	0.485
	08:40:09	28.9	0.092	0.512	0.497	0.487	0.497	0.487	0.417	0.49	0.478	0.488	0.416	0.092	0.48	0.466	0.491	0.498	0.48	0.095	0.503	0.495	0.492	0.488	0.49	0.416	0.508	0.495	0.466	0.389	0.479	0.775	0.496	0.5	0.489	0.505	0.498	0.509	0.522	0.509	0.413	0.5	0.488	0.46	0.406	0.472	0.468	0.479	0.485
	08:45:09	28.9	0.092	0.512	0.498	0.488	0.497	0.487	0.419	0.493	0.478	0.488	0.418	0.092	0.48	0.471	0.49	0.497	0.48	0.095	0.502	0.496	0.492	0.489	0.493	0.415	0.511	0.494	0.467	0.396	0.48	0.789	0.496	0.501	0.49	0.506	0.499	0.509	0.524	0.509	0.414	0.5	0.487	0.458	0.407	0.473	0.468	0.48	0.485
	08:50:09	29	0.092	0.509	0.499	0.489	0.496	0.489	0.418	0.493	0.477	0.49	0.42	0.092	0.48	0.47	0.49	0.496	0.48	0.095	0.503	0.497	0.494	0.49	0.494	0.418	0.512	0.496	0.468	0.405	0.48	0.827	0.496	0.503	0.491	0.508	0.5	0.512	0.525	0.512	0.415	0.501	0.485	0.459	0.408	0.473	0.469	0.481	0.488
	08:55:09	29	0.092	0.509	0.502	0.492	0.493	0.489	0.42	0.493	0.478	0.491	0.42	0.092	0.48	0.472	0.49	0.497	0.48	0.095	0.503	0.497	0.494	0.49	0.495	0.419	0.512	0.498	0.468	0.407	0.481	0.863	0.498	0.503	0.492	0.509	0.502	0.514	0.525	0.513	0.421	0.501	0.484	0.458	0.41	0.474	0.469	0.482	0.488
	09:00:09	29	0.092	0.51	0.502	0.491	0.491	0.487	0.418	0.493	0.478	0.492	0.422	0.092	0.48	0.475	0.489	0.497	0.481	0.095	0.503	0.497	0.494	0.489	0.495	0.42	0.514	0.499	0.468	0.408	0.481	0.907	0.497	0.504	0.492	0.511	0.503	0.515	0.528	0.514	0.423	0.501	0.483	0.457	0.413	0.476	0.469	0.482	0.489
	09:05:09	29	0.092	0.513	0.503	0.492	0.492	0.489	0.419	0.494	0.478	0.494	0.425	0.092	0.482	0.474	0.49	0.498	0.482	0.095	0.503	0.498	0.497	0.49	0.497	0.423	0.514	0.496	0.469	0.406	0.482	0.939	0.498	0.506	0.495	0.512	0.505	0.516	0.53	0.515	0.422	0.502	0.483	0.458	0.415	0.478	0.47	0.484	0.491
	09:10:09	29	0.092	0.513	0.505	0.494	0.495	0.49	0.419	0.495	0.479	0.496	0.425	0.092	0.484	0.476	0.491	0.498	0.482	0.095	0.503	0.499	0.499	0.492	0.498	0.426	0.514	0.496	0.47	0.409	0.483	0.983	0.498	0.506	0.496	0.513	0.506	0.518	0.532	0.517	0.425	0.501	0.483	0.458	0.418	0.48	0.472	0.486	0.492
	09:15:09	29	0.092	0.514	0.506	0.495	0.495	0.491	0.419	0.497	0.48	0.498	0.428	0.092	0.483	0.477	0.493	0.497	0.482	0.095	0.504	0.5	0.5	0.493	0.5	0.427	0.515	0.497	0.471	0.411	0.484	1.029	0.499	0.508	0.497	0.516	0.508	0.521	0.535	0.518	0.426	0.502	0.484	0.458	0.419	0.481	0.472	0.488	0.493
	09:20:09	29	0.092	0.515	0.507	0.497	0.498	0.492	0.42	0.497	0.481	0.499	0.431	0.092	0.484	0.477	0.495	0.498	0.484	0.095	0.504	0.499	0.502	0.494	0.503	0.432	0.517	0.495	0.47	0.411	0.485	1.063	0.5	0.51	0.498	0.517	0.51	0.521	0.535	0.518	0.427	0.502	0.483	0.457	0.421	0.481	0.471	0.488	0.494
	09:25:09	29	0.092	0.517	0.508	0.498	0.499	0.493	0.42	0.498	0.481	0.5	0.432	0.092	0.486	0.48	0.496	0.497	0.485	0.095	0.505	0.5	0.502	0.495	0.504	0.435	0.518	0.493	0.471	0.411	0.486	1.089	0.5	0.51	0.499	0.518	0.51	0.522	0.536	0.519	0.428	0.502	0.484	0.459	0.422	0.482	0.472	0.49	0.496
	09:30:09	29	0.092	0.518	0.511	0.499	0.498	0.494	0.419	0.498	0.483	0.502	0.435	0.092	0.487	0.478	0.499	0.498	0.487	0.095	0.505	0.501	0.504	0.496	0.505	0.436	0.52	0.494	0.472	0.411	0.487	1.112	0.502	0.512	0.5	0.519	0.512	0.524	0.537	0.518	0.429	0.503	0.483	0.46	0.422	0.484	0.473	0.491	0.497
	09:35:09	29	0.092	0.521	0.511	0.502	0.499	0.495	0.421	0.499	0.483	0.503	0.434	0.092	0.489	0.484	0.499	0.497	0.487	0.095	0.506	0.501	0.504	0.496	0.506	0.433	0.522	0.494	0.472	0.412	0.488	1.103	0.502	0.512	0.502	0.521	0.512	0.527	0.538	0.517	0.43	0.502	0.483	0.46	0.42	0.485	0.474	0.493	0.498
	09:40:09	29	0.092	0.523	0.513	0.504	0.501	0.496	0.422	0.501	0.484	0.505	0.435	0.092	0.49	0.483	0.501	0.496	0.489	0.095	0.507	0.503	0.506	0.497	0.508	0.435	0.522	0.494	0.472	0.413	0.49	1.094	0.504	0.514	0.504	0.523	0.514	0.528	0.539	0.518	0.431	0.502	0.483	0.46	0.421	0.487	0.475	0.493	0.499
	09:45:09	29.1	0.092	0.523	0.516	0.505	0.502	0.496	0.422	0.502	0.485	0.506	0.437	0.092	0.491	0.481	0.502	0.495	0.49	0.095	0.508	0.504	0.508	0.498	0.509	0.436	0.523	0.493	0.473	0.413	0.491	1.089	0.505	0.516	0.505	0.524	0.516	0.53	0.54	0.517	0.43	0.502	0.484	0.459	0.422	0.488	0.476	0.495	0.501
	09:50:09	29.1	0.092	0.525	0.516	0.507	0.503	0.497	0.422	0.502	0.485	0.508	0.438	0.092	0.493	0.482	0.505	0.496	0.491	0.095	0.507	0.504	0.508	0.499	0.51	0.436	0.524	0.491	0.474	0.413	0.493	1.08	0.506	0.517	0.505	0.525	0.516	0.531	0.542	0.518	0.43	0.502	0.484	0.461	0.422	0.49	0.477	0.496	0.502
	09:55:09	29.1	0.092	0.527	0.517	0.509	0.505	0.499	0.423	0.503	0.486	0.509	0.437	0.092	0.494	0.485	0.506	0.497	0.493	0.095	0.509	0.506	0.511	0.501	0.512	0.437	0.526	0.493	0.476	0.414	0.494	1.081	0.508	0.52	0.508	0.528	0.519	0.533	0.543	0.518	0.433	0.503	0.485	0.462	0.419	0.491	0.478	0.498	0.504
	10:00:09	29.1	0.092	0.528	0.519	0.511	0.506	0.5	0.424	0.505	0.487	0.511	0.437	0.092	0.496	0.483	0.508	0.492	0.494	0.095	0.51	0.507	0.511	0.502	0.514	0.438	0.528	0.491	0.476	0.413	0.496	1.081	0.509	0.52	0.508	0.529	0.52	0.534	0.543	0.52	0.432	0.504	0.487	0.463	0.418	0.492	0.479	0.5	0.505
	10:05:09	29.1	0.092	0.529	0.522	0.512	0.508	0.501	0.424	0.506	0.49	0.512	0.441	0.092	0.497	0.484	0.51	0.492	0.495	0.095	0.511	0.508	0.514	0.504	0.516	0.441	0.53	0.487	0.477	0.413	0.497	1.089	0.51	0.522	0.511	0.53	0.522	0.535	0.545	0.522	0.434	0.504	0.488	0.465	0.417	0.494	0.48	0.501	0.507
	10:10:09	29.1	0.092	0.531	0.522	0.514	0.509	0.501	0.424	0.506	0.49	0.513	0.439	0.092	0.498	0.484	0.511	0.496	0.497	0.095	0.511	0.508	0.514	0.504	0.515	0.443	0.531	0.488	0.478	0.413	0.499	1.091	0.511	0.523	0.512	0.531	0.523	0.536	0.547	0.523	0.432	0.505	0.49	0.466	0.416	0.495	0.481	0.502	0.509
	10:15:09	29.1	0.092	0.533	0.524	0.516	0.511	0.503	0.424	0.508	0.491	0.516	0.442	0.092	0.499	0.484	0.513	0.495	0.498	0.095	0.512	0.51	0.516	0.508	0.518	0.443	0.533	0.487	0.478	0.413	0.5	1.095	0.512	0.525	0.514	0.534	0.526	0.538	0.548	0.523	0.432	0.506	0.492	0.467	0.417	0.496	0.482	0.504	0.51
	10:20:09	29.1	0.092	0.534	0.525	0.517	0.512	0.505	0.425	0.51	0.492	0.517	0.442	0.092	0.5	0.487	0.515	0.494	0.499	0.095	0.513	0.511	0.517	0.509	0.521	0.444	0.535	0.488	0.48	0.413	0.502	1.102	0.513	0.526	0.515	0.535	0.528	0.539	0.55	0.524	0.432	0.506	0.492	0.468	0.417	0.497	0.485	0.505	0.511
	10:25:09	29.1	0.092	0.536	0.526	0.519	0.513	0.507	0.426	0.511	0.492	0.519	0.443	0.092	0.5	0.488	0.517	0.494	0.501	0.095	0.515	0.513	0.519	0.511	0.523	0.447	0.536	0.488	0.481	0.413	0.503	1.11	0.515	0.527	0.516	0.537	0.529	0.541	0.551	0.527	0.433	0.505	0.493	0.47	0.417	0.499	0.486	0.506	0.513
	10:30:09	29.1	0.092	0.538	0.528	0.521	0.516	0.508	0.427	0.513	0.494	0.521	0.445	0.092	0.501	0.492	0.518	0.495	0.503	0.095	0.517	0.514	0.521	0.513	0.525	0.45	0.538	0.49	0.482	0.414	0.504	1.12	0.516	0.53	0.517	0.538	0.532	0.542	0.552	0.526	0.435	0.505	0.495	0.471	0.417	0.5	0.488	0.509	0.514
	10:35:09	29.2	0.092	0.539	0.529	0.523	0.517	0.509	0.427	0.514	0.494	0.522	0.446	0.091	0.503	0.494	0.522	0.496	0.503	0.094	0.518	0.516	0.521	0.514	0.527	0.448	0.542	0.491	0.483	0.414	0.506	1.126	0.517	0.531	0.518	0.539	0.532	0.544	0.554	0.525	0.437	0.506	0.496	0.472	0.417	0.501	0.488	0.51	0.515
	10:40:09	29.2	0.092	0.54	0.531	0.524	0.518	0.51	0.428	0.515	0.496	0.524	0.446	0.092	0.505	0.494	0.523	0.496	0.505	0.095	0.519	0.517	0.523	0.515	0.528	0.449	0.543	0.492	0.486	0.415	0.507	1.135	0.517	0.531	0.52	0.541	0.534	0.545	0.555	0.527	0.437	0.508	0.497	0.474	0.417	0.503	0.49	0.511	0.517
	10:45:09	29.2	0.092	0.542	0.533	0.525	0.519	0.51	0.429	0.516	0.497	0.525	0.446	0.092	0.506	0.494	0.523	0.497	0.506	0.095	0.519	0.517	0.524	0.516	0.529	0.449	0.545	0.493	0.487	0.414	0.508	1.141	0.519	0.533	0.521	0.542	0.535	0.546	0.556	0.528	0.436	0.51	0.498	0.475	0.418	0.505	0.491	0.513	0.518
	10:50:09	29.2	0.092	0.543	0.534	0.527	0.521	0.512	0.43	0.518	0.497	0.527	0.448	0.092	0.508	0.494	0.526	0.497	0.507	0.095	0.521	0.519	0.526	0.517	0.53	0.451	0.548	0.495	0.489	0.415	0.51	1.148	0.52	0.535	0.522	0.543	0.536	0.547	0.557	0.529	0.437	0.511	0.499	0.476	0.42	0.507	0.493	0.513	0.52
	10:55:09	29.2	0.092	0.545	0.536	0.529	0.522	0.514	0.431	0.52	0.498	0.529	0.448	0.091	0.509	0.497	0.528	0.497	0.509	0.095	0.523	0.521	0.527	0.519	0.532	0.452	0.548	0.497	0.491	0.416	0.511	1.159	0.52	0.536	0.523	0.545	0.539	0.549	0.559	0.531	0.436	0.513	0.501	0.478	0.42	0.509	0.494	0.515	0.522
	11:00:09	29.2	0.092	0.547	0.537	0.531	0.524	0.516	0.433	0.521	0.499	0.531	0.448	0.092	0.511	0.497	0.532	0.499	0.511	0.094	0.524	0.522	0.529	0.521	0.534	0.454	0.549	0.498	0.494	0.418	0.513	1.166	0.522	0.538	0.525	0.547	0.54	0.551	0.561	0.533	0.436	0.515	0.503	0.481	0.422	0.511	0.496	0.517	0.523
	11:05:09	29.2	0.092	0.548	0.539	0.533	0.525	0.517	0.434	0.523	0.5	0.532	0.449	0.091	0.512	0.499	0.532	0.5	0.512	0.095	0.524	0.523	0.529	0.521	0.534	0.455	0.55	0.499	0.496	0.419	0.513	1.177	0.523	0.538	0.526	0.548	0.541	0.552	0.562	0.533	0.437	0.516	0.504	0.482	0.421	0.512	0.497	0.518	0.524
	11:10:09	29.2	0.092	0.549	0.54	0.534	0.529	0.518	0.435	0.525	0.502	0.533	0.452	0.091	0.513	0.5	0.535	0.5	0.515	0.094	0.526	0.526	0.532	0.523	0.537	0.456	0.552	0.5	0.498	0.42	0.515	1.184	0.524	0.54	0.528	0.55	0.543	0.553	0.565	0.534	0.439	0.517	0.506	0.484	0.424	0.514	0.499	0.519	0.526
	11:15:09	29.2	0.092	0.552	0.542	0.535	0.529	0.518	0.435	0.526	0.503	0.534	0.452	0.092	0.514	0.499	0.537	0.499	0.516	0.095	0.527	0.527	0.533	0.524	0.537	0.458	0.553	0.501	0.5	0.42	0.516	1.192	0.525	0.541	0.529	0.55	0.544	0.554	0.568	0.536	0.44	0.517	0.507	0.486	0.424	0.516	0.5	0.521	0.526
	11:20:09	29.2	0.092	0.552	0.542	0.536	0.531	0.52	0.435	0.528	0.503	0.536	0.453	0.091	0.517	0.5	0.538	0.499	0.518	0.095	0.527	0.529	0.534	0.526	0.539	0.46	0.554	0.502	0.501	0.421	0.519	1.198	0.527	0.542	0.529	0.551	0.546	0.556	0.57	0.537	0.441	0.519	0.508	0.488	0.425	0.518	0.502	0.522	0.527
	11:25:09	29.2	0.092	0.554	0.543	0.537	0.533	0.521	0.436	0.53	0.504	0.538	0.454	0.091	0.518	0.502	0.539	0.5	0.52	0.094	0.529	0.53	0.535	0.527	0.539	0.46	0.554	0.503	0.503	0.422	0.52	1.205	0.528	0.543	0.531	0.553	0.547	0.559	0.572	0.539	0.443	0.52	0.51	0.49	0.427	0.52	0.503	0.523	0.528
	11:30:09	29.3	0.092	0.556	0.544	0.538	0.533	0.522	0.437	0.53	0.505	0.538	0.455	0.091	0.519	0.506	0.541	0.501	0.52	0.094	0.529	0.531	0.536	0.528	0.54	0.461	0.554	0.504	0.504	0.424	0.521	1.213	0.528	0.544	0.531	0.554	0.548	0.561	0.573	0.541	0.443	0.521	0.512	0.492	0.427	0.521	0.504	0.524	0.529
	11:35:09	29.3	0.092	0.557	0.546	0.539	0.533	0.523	0.439	0.531	0.505	0.54	0.456	0.092	0.52	0.506	0.542	0.503	0.522	0.095	0.531	0.532	0.537	0.529	0.541	0.464	0.556	0.507	0.506	0.426	0.522	1.221	0.529	0.546	0.533	0.555	0.55	0.563	0.575	0.543	0.445	0.522	0.514	0.494	0.428	0.522	0.505	0.525	0.531
	11:40:09	29.3	0.092	0.56	0.547	0.542	0.535	0.524	0.441	0.533	0.507	0.542	0.455	0.092	0.522	0.506	0.545	0.505	0.524	0.094	0.532	0.533	0.538	0.53	0.543	0.465	0.558	0.509	0.507	0.427	0.524	1.229	0.53	0.546	0.534	0.556	0.552	0.565	0.577	0.545	0.447	0.523	0.517	0.497	0.43	0.524	0.507	0.526	0.532
	11:45:09	29.3	0.092	0.562	0.548	0.542	0.535	0.525	0.442	0.534	0.509	0.543	0.456	0.091	0.523	0.507	0.546	0.507	0.524	0.094	0.532	0.534	0.538	0.531	0.543	0.468	0.559	0.51	0.508	0.429	0.525	1.237	0.531	0.548	0.535	0.557	0.553	0.567	0.577	0.546	0.447	0.525	0.518	0.498	0.43	0.526	0.507	0.527	0.533
	11:50:09	29.3	0.092	0.562	0.551	0.543	0.537	0.527	0.443	0.536	0.51	0.546	0.459	0.092	0.523	0.507	0.546	0.509	0.525	0.094	0.534	0.535	0.54	0.532	0.546	0.47	0.561	0.511	0.51	0.431	0.527	1.244	0.532	0.55	0.537	0.559	0.556	0.569	0.579	0.547	0.448	0.526	0.519	0.499	0.432	0.527	0.508	0.529	0.535
	11:55:09	29.3	0.092	0.566	0.552	0.544	0.539	0.527	0.443	0.536	0.51	0.548	0.459	0.092	0.525	0.508	0.548	0.51	0.526	0.095	0.534	0.536	0.541	0.533	0.548	0.47	0.562	0.512	0.51	0.432	0.528	1.248	0.533	0.552	0.539	0.561	0.556	0.572	0.58	0.55	0.45	0.528	0.52	0.501	0.433	0.529	0.509	0.53	0.537
	12:00:09	29.3	0.092	0.565	0.555	0.547	0.54	0.528	0.442	0.537	0.51	0.55	0.459	0.091	0.527	0.509	0.549	0.512	0.527	0.094	0.535	0.537	0.542	0.534	0.549	0.472	0.564	0.513	0.511	0.434	0.529	1.255	0.534	0.554	0.541	0.562	0.559	0.573	0.581	0.552	0.452	0.528	0.522	0.503	0.433	0.531	0.51	0.531	0.538
	12:05:09	29.3	0.092	0.568	0.556	0.549	0.543	0.531	0.444	0.539	0.511	0.552	0.462	0.091	0.529	0.511	0.551	0.514	0.528	0.094	0.536	0.539	0.544	0.537	0.551	0.473	0.566	0.515	0.513	0.435	0.531	1.257	0.537	0.556	0.543	0.565	0.561	0.576	0.584	0.552	0.454	0.531	0.524	0.504	0.435	0.533	0.511	0.533	0.541
	12:10:09	29.3	0.092	0.57	0.559	0.551	0.544	0.533	0.446	0.541	0.512	0.554	0.463	0.092	0.53	0.512	0.553	0.516	0.53	0.094	0.538	0.541	0.546	0.538	0.553	0.476	0.567	0.517	0.513	0.438	0.532	1.263	0.538	0.558	0.546	0.567	0.562	0.579	0.585	0.554	0.454	0.533	0.524	0.505	0.436	0.535	0.513	0.535	0.542
	12:15:09	29.3	0.092	0.569	0.56	0.553	0.546	0.534	0.446	0.542	0.513	0.556	0.464	0.091	0.532	0.514	0.554	0.518	0.532	0.094	0.54	0.543	0.547	0.539	0.554	0.477	0.567	0.519	0.515	0.439	0.533	1.267	0.54	0.56	0.547	0.569	0.563	0.581	0.588	0.557	0.455	0.535	0.526	0.507	0.437	0.537	0.513	0.536	0.544
	12:20:08	29.3	0.092	0.573	0.561	0.554	0.548	0.536	0.448	0.544	0.514	0.557	0.466	0.091	0.534	0.515	0.558	0.519	0.534	0.094	0.541	0.545	0.549	0.542	0.556	0.478	0.569	0.52	0.516	0.44	0.535	1.272	0.541	0.561	0.549	0.57	0.564	0.584	0.59	0.56	0.457	0.536	0.527	0.509	0.439	0.539	0.515	0.538	0.545
	12:25:09	29.3	0.092	0.575	0.563	0.556	0.55	0.538	0.449	0.547	0.515	0.558	0.467	0.092	0.536	0.516	0.56	0.521	0.535	0.094	0.543	0.547	0.552	0.544	0.557	0.48	0.572	0.521	0.518	0.442	0.537	1.275	0.543	0.563	0.55	0.572	0.566	0.588	0.591	0.561	0.458	0.539	0.528	0.51	0.44	0.541	0.516	0.54	0.547
	12:30:09	29.3	0.092	0.578	0.564	0.556	0.551	0.539	0.45	0.548	0.515	0.559	0.468	0.091	0.537	0.517	0.561	0.522	0.537	0.094	0.545	0.548	0.553	0.546	0.558	0.482	0.573	0.521	0.519	0.443	0.539	1.276	0.545	0.564	0.552	0.573	0.567	0.59	0.591	0.563	0.459	0.539	0.53	0.512	0.44	0.543	0.517	0.541	0.548
	12:35:09	29.3	0.092	0.58	0.565	0.558	0.552	0.54	0.451	0.55	0.517	0.56	0.469	0.091	0.539	0.518	0.561	0.523	0.538	0.094	0.546	0.55	0.554	0.547	0.56	0.483	0.574	0.522	0.521	0.443	0.541	1.281	0.546	0.565	0.553	0.574	0.57	0.592	0.593	0.565	0.46	0.54	0.531	0.513	0.441	0.544	0.518	0.542	0.549
	12:40:09	29.3	0.092	0.581	0.566	0.559	0.554	0.542	0.452	0.552	0.52	0.562	0.471	0.091	0.54	0.519	0.563	0.526	0.54	0.094	0.549	0.552	0.555	0.549	0.561	0.486	0.576	0.523	0.522	0.446	0.543	1.288	0.548	0.567	0.555	0.575	0.572	0.593	0.595	0.567	0.462	0.541	0.532	0.515	0.443	0.546	0.52	0.545	0.551
	12:45:09	29.3	0.092	0.582	0.568	0.56	0.555	0.543	0.453	0.553	0.521	0.565	0.473	0.091	0.542	0.52	0.564	0.527	0.542	0.094	0.551	0.554	0.557	0.55	0.563	0.487	0.577	0.525	0.525	0.447	0.545	1.294	0.549	0.569	0.556	0.577	0.573	0.596	0.597	0.569	0.463	0.541	0.534	0.516	0.444	0.548	0.521	0.545	0.552
	12:50:09	29.3	0.092	0.584	0.571	0.562	0.556	0.545	0.454	0.556	0.522	0.567	0.473	0.091	0.544	0.521	0.566	0.529	0.543	0.094	0.552	0.556	0.56	0.553	0.565	0.489	0.579	0.527	0.528	0.447	0.547	1.3	0.55	0.571	0.559	0.579	0.576	0.598	0.598	0.57	0.463	0.543	0.536	0.519	0.445	0.55	0.523	0.549	0.555
	12:55:09	29.3	0.092	0.587	0.572	0.564	0.558	0.547	0.455	0.557	0.524	0.568	0.475	0.091	0.545	0.523	0.568	0.53	0.545	0.094	0.554	0.557	0.561	0.553	0.566	0.489	0.58	0.529	0.529	0.448	0.548	1.301	0.551	0.573	0.56	0.581	0.578	0.599	0.6	0.571	0.464	0.544	0.538	0.521	0.447	0.551	0.524	0.55	0.558
	13:00:09	29.3	0.091	0.591	0.574	0.566	0.561	0.549	0.457	0.559	0.525	0.571	0.477	0.091	0.547	0.525	0.57	0.531	0.547	0.094	0.556	0.559	0.564	0.555	0.568	0.492	0.582	0.531	0.531	0.451	0.549	1.302	0.553	0.574	0.562	0.583	0.58	0.602	0.601	0.574	0.465	0.547	0.54	0.523	0.449	0.553	0.526	0.552	0.56
	13:05:09	29.3	0.092	0.594	0.575	0.567	0.562	0.549	0.458	0.56	0.526	0.574	0.476	0.091	0.55	0.526	0.571	0.532	0.548	0.094	0.556	0.561	0.564	0.556	0.569	0.492	0.585	0.533	0.532	0.452	0.55	1.307	0.554	0.576	0.563	0.584	0.583	0.603	0.603	0.577	0.467	0.548	0.541	0.524	0.45	0.555	0.527	0.554	0.561
	13:10:09	29.3	0.091	0.598	0.579	0.569	0.564	0.551	0.46	0.561	0.527	0.576	0.479	0.091	0.552	0.527	0.572	0.534	0.551	0.094	0.558	0.562	0.567	0.558	0.571	0.494	0.586	0.535	0.533	0.454	0.553	1.313	0.555	0.577	0.565	0.585	0.584	0.605	0.604	0.58	0.468	0.548	0.542	0.526	0.451	0.557	0.528	0.555	0.563
	13:15:09	29.3	0.091	0.603	0.579	0.57	0.566	0.552	0.461	0.563	0.528	0.579	0.481	0.091	0.555	0.528	0.574	0.536	0.553	0.094	0.56	0.565	0.569	0.559	0.574	0.495	0.588	0.536	0.534	0.454	0.555	1.315	0.558	0.578	0.567	0.588	0.587	0.609	0.605	0.583	0.47	0.552	0.544	0.527	0.453	0.558	0.53	0.558	0.565
	13:20:09	29.3	0.092	0.601	0.58	0.572	0.567	0.553	0.461	0.563	0.528	0.58	0.48	0.091	0.558	0.529	0.576	0.536	0.555	0.094	0.561	0.565	0.568	0.559	0.573	0.495	0.59	0.537	0.535	0.455	0.557	1.318	0.559	0.579	0.568	0.588	0.587	0.608	0.607	0.584	0.472	0.556	0.545	0.528	0.453	0.56	0.531	0.558	0.566
	13:25:09	29.4	0.092	0.602	0.581	0.574	0.571	0.555	0.463	0.566	0.529	0.582	0.484	0.091	0.56	0.531	0.578	0.537	0.558	0.094	0.562	0.568	0.571	0.562	0.577	0.497	0.592	0.539	0.537	0.457	0.559	1.321	0.56	0.581	0.57	0.59	0.589	0.611	0.608	0.587	0.474	0.558	0.548	0.529	0.455	0.563	0.533	0.56	0.569
	13:30:09	29.4	0.091	0.603	0.582	0.575	0.573	0.557	0.464	0.567	0.53	0.586	0.484	0.091	0.562	0.532	0.58	0.539	0.561	0.094	0.563	0.569	0.573	0.564	0.579	0.498	0.593	0.54	0.539	0.459	0.561	1.325	0.561	0.583	0.571	0.592	0.591	0.611	0.611	0.589	0.476	0.559	0.55	0.531	0.456	0.564	0.536	0.562	0.57
	13:35:09	29.4	0.092	0.603	0.584	0.576	0.575	0.558	0.465	0.568	0.531	0.587	0.486	0.091	0.564	0.533	0.582	0.54	0.563	0.094	0.565	0.571	0.575	0.566	0.58	0.499	0.595	0.542	0.541	0.46	0.564	1.33	0.563	0.584	0.573	0.595	0.593	0.613	0.611	0.594	0.476	0.561	0.553	0.533	0.457	0.566	0.537	0.564	0.572
	13:40:09	29.4	0.091	0.605	0.586	0.578	0.578	0.561	0.467	0.569	0.533	0.589	0.487	0.091	0.566	0.536	0.585	0.542	0.566	0.094	0.568	0.573	0.577	0.568	0.582	0.501	0.598	0.545	0.544	0.46	0.566	1.341	0.565	0.586	0.575	0.596	0.596	0.615	0.614	0.597	0.478	0.561	0.556	0.535	0.459	0.568	0.539	0.566	0.575
	13:45:09	29.4	0.092	0.605	0.589	0.58	0.579	0.561	0.468	0.57	0.536	0.591	0.487	0.091	0.568	0.536	0.586	0.544	0.567	0.094	0.568	0.573	0.577	0.569	0.583	0.501	0.599	0.547	0.547	0.461	0.568	1.353	0.566	0.588	0.577	0.598	0.596	0.615	0.616	0.6	0.479	0.562	0.558	0.537	0.46	0.569	0.541	0.567	0.575
	13:50:09	29.4	0.091	0.61	0.589	0.581	0.58	0.563	0.469	0.572	0.537	0.594	0.489	0.091	0.57	0.538	0.587	0.546	0.569	0.094	0.569	0.575	0.578	0.57	0.585	0.501	0.602	0.551	0.55	0.463	0.569	1.361	0.568	0.589	0.578	0.599	0.598	0.616	0.617	0.604	0.48	0.564	0.56	0.54	0.461	0.571	0.542	0.568	0.578
	13:55:09	29.4	0.092	0.61	0.593	0.583	0.583	0.564	0.471	0.574	0.539	0.595	0.49	0.091	0.573	0.54	0.588	0.548	0.571	0.094	0.571	0.577	0.581	0.572	0.589	0.504	0.603	0.553	0.552	0.465	0.572	1.37	0.569	0.59	0.579	0.601	0.601	0.619	0.619	0.608	0.482	0.567	0.563	0.542	0.463	0.573	0.544	0.57	0.58
	14:00:09	29.4	0.091	0.61	0.595	0.583	0.584	0.565	0.472	0.575	0.54	0.597	0.492	0.091	0.574	0.542	0.591	0.549	0.572	0.093	0.572	0.578	0.582	0.573	0.59	0.504	0.605	0.554	0.554	0.466	0.574	1.374	0.57	0.591	0.581	0.602	0.601	0.62	0.62	0.61	0.483	0.567	0.564	0.543	0.464	0.574	0.546	0.572	0.581
	14:05:09	29.4	0.091	0.613	0.596	0.585	0.585	0.567	0.474	0.576	0.542	0.599	0.493	0.091	0.576	0.544	0.593	0.552	0.574	0.093	0.574	0.58	0.584	0.575	0.592	0.506	0.606	0.557	0.557	0.467	0.576	1.379	0.573	0.593	0.582	0.604	0.603	0.621	0.621	0.613	0.485	0.573	0.566	0.545	0.466	0.576	0.548	0.574	0.582
	14:10:09	29.4	0.091	0.615	0.598	0.587	0.588	0.569	0.474	0.577	0.544	0.6	0.496	0.091	0.577	0.546	0.594	0.554	0.576	0.094	0.575	0.581	0.585	0.576	0.593	0.507	0.608	0.56	0.559	0.467	0.578	1.382	0.574	0.594	0.583	0.606	0.605	0.623	0.622	0.614	0.486	0.576	0.568	0.547	0.467	0.579	0.55	0.575	0.585
	14:15:09	29.4	0.091	0.616	0.599	0.588	0.589	0.571	0.475	0.579	0.546	0.602	0.497	0.091	0.579	0.548	0.596	0.555	0.577	0.094	0.577	0.584	0.586	0.578	0.596	0.508	0.609	0.564	0.561	0.468	0.579	1.383	0.576	0.596	0.585	0.607	0.606	0.625	0.622	0.616	0.488	0.578	0.57	0.548	0.469	0.579	0.551	0.577	0.586
	14:20:09	29.4	0.091	0.619	0.599	0.589	0.59	0.571	0.477	0.58	0.547	0.604	0.498	0.091	0.581	0.55	0.598	0.557	0.578	0.093	0.577	0.583	0.588	0.579	0.596	0.509	0.61	0.567	0.563	0.47	0.581	1.385	0.576	0.597	0.586	0.609	0.607	0.626	0.623	0.617	0.489	0.58	0.572	0.549	0.47	0.581	0.553	0.578	0.587
	14:25:09	29.4	0.091	0.62	0.601	0.591	0.592	0.574	0.479	0.582	0.548	0.605	0.499	0.091	0.583	0.552	0.599	0.558	0.58	0.094	0.579	0.586	0.59	0.581	0.597	0.51	0.61	0.571	0.565	0.471	0.582	1.384	0.578	0.599	0.588	0.611	0.608	0.629	0.626	0.618	0.49	0.582	0.574	0.55	0.471	0.583	0.555	0.58	0.589
	14:30:09	29.4	0.091	0.622	0.602	0.591	0.593	0.575	0.48	0.583	0.55	0.608	0.5	0.091	0.585	0.553	0.601	0.56	0.58	0.093	0.58	0.588	0.591	0.583	0.6	0.512	0.612	0.573	0.566	0.471	0.584	1.383	0.578	0.601	0.59	0.612	0.61	0.63	0.628	0.621	0.492	0.583	0.575	0.552	0.473	0.585	0.557	0.582	0.59
	14:35:09	29.4	0.091	0.624	0.605	0.593	0.595	0.578	0.482	0.585	0.553	0.611	0.501	0.091	0.587	0.557	0.603	0.564	0.582	0.093	0.582	0.59	0.594	0.585	0.602	0.513	0.613	0.575	0.569	0.471	0.586	1.381	0.581	0.603	0.591	0.614	0.613	0.631	0.629	0.623	0.494	0.586	0.577	0.554	0.474	0.586	0.558	0.583	0.592
	14:40:09	29.4	0.091	0.626	0.605	0.593	0.597	0.58	0.483	0.587	0.553	0.611	0.504	0.091	0.588	0.558	0.605	0.566	0.584	0.093	0.583	0.591	0.595	0.587	0.603	0.515	0.616	0.578	0.57	0.474	0.586	1.377	0.581	0.604	0.593	0.616	0.613	0.631	0.63	0.626	0.496	0.589	0.578	0.556	0.476	0.587	0.56	0.586	0.592
	14:45:09	29.4	0.091	0.628	0.607	0.595	0.597	0.58	0.484	0.588	0.556	0.612	0.505	0.091	0.589	0.56	0.606	0.567	0.585	0.093	0.585	0.592	0.596	0.588	0.604	0.515	0.617	0.58	0.572	0.474	0.588	1.376	0.584	0.605	0.594	0.617	0.615	0.632	0.633	0.626	0.497	0.59	0.579	0.557	0.477	0.588	0.562	0.586	0.594
	14:50:09	29.4	0.091	0.631	0.609	0.597	0.599	0.583	0.486	0.591	0.557	0.615	0.507	0.091	0.592	0.561	0.608	0.57	0.587	0.093	0.587	0.594	0.599	0.59	0.607	0.518	0.62	0.582	0.573	0.474	0.59	1.374	0.585	0.607	0.596	0.619	0.617	0.635	0.634	0.628	0.498	0.592	0.582	0.558	0.479	0.59	0.563	0.589	0.594
	14:55:09	29.4	0.092	0.632	0.61	0.599	0.6	0.585	0.487	0.593	0.559	0.616	0.509	0.091	0.594	0.563	0.609	0.572	0.587	0.093	0.588	0.596	0.599	0.592	0.607	0.519	0.621	0.583	0.575	0.476	0.591	1.372	0.586	0.608	0.598	0.62	0.618	0.636	0.635	0.629	0.5	0.595	0.583	0.559	0.48	0.591	0.565	0.59	0.597
	15:00:09	29.4	0.091	0.632	0.611	0.6	0.6	0.586	0.488	0.595	0.559	0.618	0.509	0.091	0.596	0.565	0.611	0.574	0.589	0.093	0.589	0.597	0.601	0.593	0.609	0.52	0.623	0.585	0.576	0.478	0.592	1.371	0.587	0.61	0.599	0.621	0.619	0.637	0.637	0.628	0.502	0.596	0.584	0.561	0.482	0.593	0.566	0.592	0.599
	15:05:09	29.4	0.091	0.634	0.613	0.602	0.603	0.587	0.49	0.598	0.561	0.619	0.512	0.091	0.597	0.566	0.612	0.574	0.59	0.093	0.591	0.598	0.603	0.595	0.612	0.522	0.624	0.585	0.578	0.479	0.594	1.37	0.589	0.611	0.601	0.623	0.621	0.639	0.64	0.631	0.503	0.598	0.585	0.562	0.484	0.594	0.568	0.593	0.6
	15:10:09	29.4	0.091	0.636	0.615	0.603	0.604	0.589	0.49	0.598	0.562	0.62	0.512	0.091	0.599	0.567	0.614	0.577	0.591	0.093	0.593	0.6	0.605	0.596	0.612	0.524	0.625	0.589	0.579	0.479	0.595	1.369	0.591	0.612	0.602	0.625	0.623	0.64	0.639	0.632	0.504	0.599	0.586	0.564	0.486	0.597	0.57	0.594	0.602
	15:15:09	29.4	0.091	0.637	0.616	0.604	0.605	0.592	0.492	0.599	0.564	0.621	0.515	0.091	0.599	0.569	0.616	0.58	0.593	0.093	0.594	0.602	0.606	0.598	0.614	0.525	0.627	0.589	0.58	0.481	0.596	1.367	0.592	0.614	0.604	0.626	0.624	0.642	0.64	0.634	0.505	0.601	0.587	0.565	0.487	0.598	0.571	0.596	0.605
	15:20:08	29.4	0.091	0.64	0.619	0.607	0.608	0.592	0.494	0.602	0.566	0.623	0.515	0.091	0.599	0.57	0.618	0.582	0.594	0.093	0.596	0.605	0.609	0.6	0.615	0.527	0.629	0.591	0.582	0.483	0.598	1.367	0.594	0.616	0.606	0.628	0.626	0.643	0.642	0.637	0.507	0.603	0.587	0.566	0.489	0.599	0.572	0.598	0.605
	15:25:09	29.4	0.091	0.64	0.62	0.608	0.61	0.593	0.495	0.602	0.566	0.625	0.515	0.091	0.601	0.571	0.62	0.583	0.594	0.093	0.598	0.604	0.609	0.601	0.615	0.527	0.631	0.595	0.583	0.483	0.599	1.367	0.595	0.617	0.606	0.629	0.626	0.644	0.642	0.639	0.508	0.604	0.588	0.567	0.49	0.601	0.574	0.599	0.606
	15:30:09	29.4	0.091	0.64	0.622	0.61	0.612	0.594	0.497	0.603	0.568	0.627	0.518	0.091	0.604	0.572	0.621	0.585	0.596	0.093	0.599	0.605	0.611	0.602	0.616	0.529	0.632	0.595	0.585	0.484	0.601	1.367	0.597	0.619	0.608	0.63	0.628	0.646	0.645	0.64	0.51	0.606	0.589	0.568	0.492	0.602	0.575	0.601	0.609
	15:35:09	29.4	0.091	0.645	0.624	0.609	0.615	0.596	0.498	0.604	0.569	0.628	0.519	0.091	0.605	0.574	0.622	0.588	0.598	0.093	0.6	0.607	0.612	0.603	0.618	0.53	0.633	0.597	0.586	0.485	0.602	1.366	0.598	0.619	0.61	0.631	0.629	0.647	0.645	0.641	0.511	0.607	0.591	0.568	0.494	0.603	0.577	0.601	0.61
	15:40:09	29.4	0.091	0.648	0.625	0.612	0.615	0.597	0.5	0.606	0.571	0.629	0.52	0.091	0.609	0.577	0.625	0.591	0.6	0.093	0.602	0.61	0.614	0.605	0.619	0.531	0.635	0.598	0.588	0.487	0.604	1.367	0.6	0.622	0.611	0.633	0.631	0.649	0.646	0.643	0.511	0.608	0.593	0.57	0.496	0.605	0.579	0.603	0.611
	15:45:09	29.4	0.091	0.647	0.627	0.613	0.614	0.598	0.501	0.607	0.572	0.63	0.52	0.091	0.611	0.579	0.626	0.593	0.601	0.093	0.603	0.611	0.615	0.606	0.62	0.532	0.636	0.6	0.588	0.488	0.606	1.366	0.602	0.623	0.613	0.634	0.632	0.651	0.649	0.645	0.513	0.609	0.594	0.573	0.498	0.606	0.581	0.605	0.612
	15:50:09	29.4	0.091	0.649	0.628	0.616	0.614	0.601	0.503	0.609	0.573	0.633	0.523	0.091	0.612	0.584	0.627	0.594	0.602	0.093	0.605	0.613	0.617	0.608	0.623	0.535	0.636	0.601	0.59	0.489	0.607	1.367	0.603	0.624	0.614	0.636	0.635	0.651	0.648	0.648	0.515	0.611	0.596	0.575	0.5	0.608	0.582	0.606	0.615
	15:55:09	29.4	0.091	0.65	0.629	0.617	0.615	0.6	0.504	0.61	0.574	0.633	0.525	0.091	0.613	0.585	0.627	0.594	0.603	0.093	0.606	0.613	0.618	0.609	0.623	0.536	0.637	0.603	0.591	0.49	0.609	1.367	0.604	0.625	0.616	0.637	0.635	0.654	0.65	0.647	0.515	0.611	0.598	0.575	0.501	0.609	0.584	0.607	0.615
	16:00:09	29.4	0.091	0.653	0.63	0.618	0.619	0.603	0.505	0.612	0.575	0.635	0.527	0.091	0.613	0.586	0.629	0.6	0.605	0.093	0.608	0.617	0.62	0.611	0.623	0.538	0.638	0.605	0.592	0.492	0.61	1.367	0.606	0.627	0.617	0.639	0.637	0.656	0.653	0.649	0.517	0.614	0.599	0.578	0.504	0.611	0.585	0.61	0.617
	16:05:09	29.4	0.091	0.655	0.63	0.619	0.62	0.604	0.506	0.613	0.576	0.636	0.528	0.091	0.613	0.586	0.631	0.604	0.607	0.093	0.609	0.617	0.622	0.612	0.625	0.54	0.64	0.606	0.593	0.493	0.61	1.367	0.607	0.628	0.619	0.641	0.638	0.658	0.655	0.65	0.519	0.616	0.6	0.581	0.506	0.612	0.587	0.61	0.619
	16:10:09	29.4	0.091	0.656	0.632	0.62	0.62	0.605	0.507	0.614	0.578	0.638	0.529	0.091	0.613	0.588	0.631	0.603	0.607	0.093	0.611	0.618	0.623	0.613	0.627	0.541	0.642	0.607	0.594	0.495	0.61	1.366	0.609	0.63	0.621	0.642	0.64	0.658	0.659	0.65	0.52	0.618	0.601	0.581	0.507	0.613	0.588	0.612	0.62
	16:15:09	29.4	0.091	0.657	0.635	0.622	0.622	0.606	0.509	0.616	0.58	0.638	0.53	0.091	0.613	0.587	0.633	0.603	0.609	0.093	0.613	0.619	0.624	0.614	0.627	0.542	0.644	0.608	0.596	0.496	0.612	1.366	0.61	0.631	0.622	0.643	0.641	0.659	0.66	0.65	0.521	0.619	0.602	0.581	0.508	0.614	0.589	0.613	0.621
	16:20:09	29.4	0.091	0.66	0.637	0.624	0.624	0.608	0.511	0.618	0.582	0.641	0.531	0.091	0.614	0.589	0.634	0.604	0.61	0.093	0.614	0.62	0.626	0.616	0.629	0.544	0.646	0.609	0.597	0.497	0.614	1.366	0.612	0.632	0.623	0.644	0.642	0.661	0.661	0.651	0.522	0.619	0.602	0.584	0.511	0.616	0.59	0.614	0.623
	16:25:09	29.4	0.091	0.663	0.637	0.623	0.625	0.609	0.511	0.619	0.582	0.642	0.53	0.091	0.617	0.592	0.637	0.605	0.611	0.093	0.615	0.621	0.627	0.616	0.63	0.544	0.647	0.61	0.598	0.497	0.614	1.367	0.613	0.633	0.624	0.646	0.644	0.662	0.662	0.651	0.524	0.622	0.602	0.583	0.513	0.618	0.592	0.616	0.625
	16:30:09	29.4	0.091	0.663	0.64	0.625	0.625	0.61	0.513	0.62	0.586	0.643	0.53	0.091	0.619	0.593	0.639	0.605	0.612	0.093	0.617	0.623	0.627	0.617	0.63	0.544	0.649	0.61	0.6	0.499	0.616	1.367	0.615	0.635	0.625	0.647	0.645	0.662	0.663	0.651	0.526	0.622	0.604	0.584	0.513	0.619	0.593	0.616	0.626
	16:35:09	29.4	0.091	0.662	0.642	0.628	0.626	0.611	0.514	0.621	0.587	0.645	0.533	0.091	0.622	0.592	0.638	0.608	0.614	0.093	0.619	0.624	0.629	0.619	0.633	0.547	0.65	0.612	0.601	0.5	0.618	1.367	0.617	0.636	0.627	0.648	0.646	0.665	0.662	0.652	0.528	0.625	0.605	0.585	0.515	0.62	0.595	0.618	0.626
	16:40:09	29.4	0.091	0.664	0.643	0.629	0.626	0.612	0.515	0.622	0.587	0.646	0.533	0.091	0.623	0.593	0.64	0.611	0.616	0.093	0.62	0.625	0.63	0.619	0.633	0.546	0.65	0.614	0.603	0.501	0.62	1.366	0.617	0.637	0.628	0.648	0.648	0.666	0.662	0.653	0.529	0.628	0.607	0.586	0.517	0.621	0.595	0.618	0.629
	16:45:09	29.4	0.091	0.667	0.643	0.629	0.629	0.614	0.516	0.624	0.587	0.648	0.533	0.091	0.625	0.594	0.642	0.61	0.618	0.093	0.621	0.627	0.632	0.621	0.633	0.549	0.651	0.617	0.604	0.502	0.621	1.366	0.619	0.639	0.629	0.65	0.649	0.668	0.665	0.654	0.531	0.629	0.608	0.588	0.519	0.623	0.597	0.621	0.63
	16:50:09	29.4	0.091	0.667	0.645	0.631	0.631	0.615	0.517	0.625	0.59	0.649	0.536	0.091	0.626	0.597	0.643	0.611	0.617	0.093	0.622	0.628	0.632	0.621	0.636	0.55	0.652	0.618	0.606	0.503	0.623	1.366	0.621	0.64	0.631	0.652	0.651	0.669	0.666	0.657	0.532	0.629	0.61	0.588	0.521	0.625	0.598	0.622	0.631
	16:55:09	29.4	0.091	0.668	0.646	0.633	0.632	0.617	0.519	0.626	0.59	0.65	0.538	0.091	0.626	0.599	0.643	0.613	0.619	0.093	0.624	0.63	0.635	0.624	0.638	0.553	0.654	0.617	0.607	0.504	0.624	1.367	0.621	0.642	0.632	0.653	0.652	0.671	0.667	0.657	0.533	0.631	0.611	0.588	0.522	0.625	0.599	0.623	0.633
	17:00:09	29.4	0.091	0.669	0.646	0.632	0.633	0.618	0.52	0.626	0.591	0.65	0.537	0.091	0.626	0.602	0.644	0.614	0.62	0.093	0.625	0.63	0.635	0.624	0.637	0.553	0.656	0.617	0.609	0.505	0.624	1.366	0.623	0.642	0.633	0.654	0.653	0.672	0.668	0.661	0.534	0.63	0.613	0.59	0.524	0.626	0.6	0.624	0.633
	17:05:09	29.4	0.091	0.67	0.649	0.633	0.634	0.619	0.521	0.628	0.592	0.651	0.54	0.091	0.627	0.603	0.645	0.618	0.623	0.093	0.626	0.631	0.637	0.626	0.64	0.555	0.658	0.617	0.611	0.506	0.626	1.366	0.624	0.644	0.635	0.655	0.655	0.673	0.67	0.663	0.536	0.632	0.614	0.592	0.526	0.627	0.602	0.626	0.634
	17:10:09	29.4	0.091	0.671	0.65	0.634	0.636	0.62	0.521	0.629	0.595	0.653	0.54	0.091	0.629	0.604	0.646	0.619	0.624	0.093	0.628	0.633	0.638	0.627	0.64	0.556	0.66	0.618	0.611	0.508	0.628	1.365	0.625	0.645	0.636	0.657	0.656	0.674	0.673	0.666	0.537	0.634	0.614	0.593	0.527	0.629	0.603	0.627	0.635
	17:15:09	29.4	0.091	0.672	0.653	0.638	0.638	0.622	0.523	0.631	0.597	0.655	0.542	0.091	0.631	0.606	0.649	0.62	0.624	0.093	0.63	0.635	0.64	0.629	0.642	0.558	0.661	0.618	0.613	0.51	0.629	1.365	0.627	0.647	0.639	0.658	0.658	0.676	0.673	0.666	0.539	0.634	0.614	0.593	0.529	0.631	0.604	0.628	0.637
	17:20:09	29.4	0.091	0.675	0.653	0.638	0.638	0.623	0.523	0.632	0.595	0.656	0.542	0.091	0.632	0.606	0.65	0.621	0.626	0.093	0.63	0.634	0.64	0.629	0.643	0.557	0.662	0.619	0.614	0.511	0.63	1.365	0.628	0.648	0.639	0.659	0.658	0.677	0.675	0.667	0.54	0.637	0.615	0.596	0.53	0.631	0.605	0.629	0.638
	17:25:09	29.4	0.091	0.677	0.654	0.639	0.638	0.623	0.524	0.632	0.596	0.656	0.542	0.091	0.634	0.607	0.652	0.621	0.627	0.093	0.631	0.635	0.641	0.63	0.643	0.559	0.663	0.621	0.616	0.511	0.631	1.365	0.63	0.649	0.64	0.659	0.659	0.679	0.676	0.668	0.54	0.637	0.616	0.598	0.531	0.633	0.606	0.63	0.64
	17:30:09	29.4	0.091	0.677	0.656	0.641	0.639	0.624	0.525	0.632	0.598	0.658	0.542	0.091	0.635	0.608	0.654	0.622	0.628	0.093	0.632	0.637	0.642	0.631	0.644	0.56	0.664	0.623	0.617	0.511	0.633	1.365	0.632	0.65	0.641	0.66	0.66	0.68	0.678	0.668	0.541	0.637	0.618	0.598	0.532	0.634	0.607	0.631	0.641
	17:35:09	29.4	0.091	0.675	0.656	0.64	0.636	0.622	0.522	0.63	0.596	0.655	0.538	0.091	0.633	0.608	0.653	0.622	0.626	0.093	0.631	0.635	0.64	0.628	0.641	0.556	0.664	0.623	0.616	0.511	0.632	1.363	0.631	0.65	0.641	0.66	0.66	0.68	0.678	0.669	0.54	0.637	0.618	0.597	0.53	0.635	0.607	0.631	0.64
	17:40:09	29.4	0.091	0.679	0.658	0.643	0.643	0.628	0.527	0.636	0.6	0.66	0.544	0.091	0.636	0.612	0.657	0.625	0.631	0.093	0.635	0.64	0.646	0.634	0.646	0.565	0.668	0.626	0.619	0.515	0.635	1.363	0.634	0.653	0.644	0.663	0.664	0.683	0.68	0.669	0.543	0.64	0.621	0.6	0.535	0.636	0.61	0.634	0.644
	17:45:09	29.4	0.091	0.681	0.659	0.645	0.644	0.628	0.527	0.636	0.601	0.661	0.545	0.091	0.637	0.612	0.659	0.626	0.633	0.093	0.636	0.641	0.645	0.635	0.648	0.565	0.671	0.629	0.62	0.515	0.636	1.363	0.635	0.654	0.645	0.664	0.665	0.683	0.682	0.669	0.545	0.639	0.623	0.6	0.537	0.637	0.61	0.635	0.646
	17:50:09	29.4	0.091	0.681	0.66	0.645	0.645	0.63	0.529	0.638	0.602	0.663	0.546	0.091	0.638	0.613	0.66	0.624	0.634	0.093	0.638	0.643	0.647	0.636	0.649	0.566	0.672	0.631	0.621	0.515	0.636	1.363	0.636	0.656	0.647	0.666	0.665	0.685	0.683	0.671	0.547	0.643	0.623	0.601	0.539	0.639	0.611	0.636	0.647
	17:55:09	29.4	0.091	0.683	0.662	0.647	0.643	0.63	0.53	0.639	0.604	0.664	0.548	0.091	0.639	0.615	0.661	0.626	0.635	0.093	0.638	0.644	0.648	0.636	0.649	0.568	0.672	0.631	0.621	0.517	0.637	1.363	0.636	0.656	0.647	0.666	0.667	0.685	0.683	0.671	0.547	0.643	0.623	0.603	0.539	0.639	0.612	0.637	0.647
	18:00:09	29.4	0.091	0.684	0.662	0.648	0.645	0.631	0.53	0.639	0.604	0.664	0.55	0.091	0.64	0.616	0.663	0.629	0.635	0.093	0.64	0.644	0.649	0.638	0.651	0.568	0.673	0.633	0.623	0.516	0.637	1.362	0.638	0.658	0.648	0.667	0.668	0.686	0.685	0.673	0.548	0.644	0.624	0.604	0.54	0.64	0.613	0.638	0.65
	18:05:09	29.4	0.091	0.685	0.663	0.649	0.648	0.633	0.531	0.641	0.605	0.667	0.55	0.091	0.642	0.619	0.665	0.632	0.637	0.093	0.641	0.646	0.651	0.64	0.653	0.57	0.674	0.633	0.625	0.517	0.638	1.363	0.64	0.659	0.65	0.67	0.67	0.688	0.687	0.674	0.55	0.645	0.624	0.605	0.541	0.642	0.614	0.639	0.652
	18:10:09	29.4	0.091	0.686	0.665	0.651	0.649	0.634	0.532	0.643	0.607	0.667	0.553	0.091	0.643	0.619	0.665	0.632	0.638	0.093	0.643	0.648	0.651	0.64	0.653	0.57	0.674	0.633	0.626	0.519	0.639	1.362	0.642	0.661	0.651	0.67	0.67	0.688	0.687	0.678	0.551	0.648	0.625	0.606	0.542	0.644	0.615	0.641	0.652
	18:15:09	29.4	0.091	0.687	0.666	0.653	0.651	0.635	0.533	0.644	0.608	0.669	0.555	0.091	0.645	0.619	0.666	0.632	0.639	0.093	0.644	0.649	0.653	0.642	0.654	0.571	0.674	0.633	0.627	0.519	0.641	1.361	0.643	0.662	0.652	0.671	0.672	0.69	0.687	0.677	0.553	0.648	0.625	0.607	0.544	0.645	0.617	0.642	0.653
	18:20:09	29.4	0.091	0.688	0.667	0.652	0.651	0.636	0.533	0.644	0.608	0.67	0.556	0.091	0.645	0.62	0.667	0.633	0.64	0.093	0.644	0.65	0.653	0.642	0.654	0.571	0.675	0.634	0.627	0.52	0.641	1.362	0.644	0.663	0.653	0.672	0.673	0.691	0.689	0.679	0.555	0.648	0.626	0.608	0.545	0.645	0.617	0.643	0.655
	18:25:09	29.4	0.091	0.689	0.668	0.654	0.652	0.638	0.535	0.646	0.609	0.671	0.557	0.091	0.646	0.622	0.669	0.634	0.642	0.093	0.646	0.651	0.655	0.644	0.656	0.573	0.678	0.635	0.628	0.522	0.642	1.36	0.646	0.664	0.655	0.674	0.675	0.694	0.69	0.678	0.556	0.649	0.627	0.609	0.547	0.646	0.618	0.644	0.657
	18:30:09	29.4	0.091	0.691	0.669	0.655	0.653	0.639	0.535	0.647	0.611	0.67	0.556	0.091	0.647	0.623	0.669	0.636	0.643	0.093	0.646	0.652	0.655	0.644	0.657	0.574	0.678	0.635	0.629	0.522	0.643	1.36	0.647	0.665	0.656	0.674	0.676	0.694	0.691	0.679	0.557	0.65	0.628	0.61	0.55	0.647	0.619	0.645	0.657
	18:35:09	29.4	0.091	0.693	0.67	0.655	0.656	0.639	0.536	0.647	0.611	0.672	0.557	0.091	0.647	0.623	0.67	0.637	0.644	0.093	0.646	0.653	0.656	0.645	0.658	0.575	0.679	0.637	0.629	0.522	0.643	1.36	0.648	0.666	0.657	0.675	0.676	0.695	0.692	0.678	0.558	0.651	0.629	0.611	0.551	0.649	0.62	0.646	0.658
	18:40:09	29.4	0.091	0.695	0.673	0.657	0.657	0.64	0.538	0.649	0.615	0.673	0.558	0.091	0.648	0.624	0.671	0.638	0.645	0.093	0.649	0.654	0.657	0.647	0.659	0.578	0.681	0.637	0.63	0.523	0.645	1.36	0.65	0.667	0.658	0.676	0.677	0.696	0.693	0.678	0.558	0.653	0.631	0.612	0.552	0.649	0.621	0.647	0.658
	18:45:09	29.4	0.091	0.697	0.674	0.658	0.657	0.642	0.539	0.65	0.615	0.675	0.561	0.091	0.649	0.624	0.672	0.639	0.646	0.093	0.65	0.656	0.659	0.649	0.661	0.582	0.681	0.637	0.632	0.524	0.646	1.36	0.651	0.668	0.659	0.678	0.679	0.698	0.695	0.68	0.561	0.654	0.632	0.613	0.554	0.65	0.621	0.649	0.66
	18:50:09	29.4	0.091	0.699	0.676	0.66	0.658	0.643	0.541	0.652	0.616	0.677	0.563	0.091	0.65	0.625	0.674	0.639	0.647	0.093	0.651	0.657	0.66	0.649	0.663	0.582	0.682	0.637	0.633	0.525	0.647	1.36	0.652	0.67	0.66	0.678	0.68	0.7	0.696	0.684	0.563	0.655	0.633	0.614	0.556	0.652	0.622	0.65	0.66
	18:55:09	29.4	0.091	0.7	0.677	0.661	0.659	0.644	0.541	0.653	0.618	0.677	0.563	0.091	0.651	0.626	0.675	0.642	0.648	0.093	0.651	0.658	0.661	0.65	0.663	0.582	0.684	0.638	0.634	0.525	0.648	1.359	0.654	0.67	0.66	0.679	0.681	0.701	0.697	0.685	0.566	0.655	0.635	0.615	0.556	0.652	0.623	0.65	0.661
	19:00:09	29.4	0.091	0.701	0.677	0.661	0.661	0.645	0.542	0.653	0.617	0.678	0.564	0.091	0.652	0.626	0.676	0.643	0.649	0.093	0.653	0.659	0.662	0.651	0.664	0.585	0.685	0.638	0.635	0.527	0.647	1.359	0.656	0.671	0.662	0.68	0.683	0.701	0.698	0.686	0.569	0.657	0.635	0.617	0.557	0.654	0.624	0.652	0.662
	19:05:09	29.4	0.091	0.702	0.677	0.662	0.661	0.645	0.542	0.654	0.618	0.678	0.565	0.091	0.654	0.627	0.679	0.642	0.65	0.093	0.653	0.66	0.662	0.651	0.665	0.583	0.686	0.639	0.637	0.527	0.648	1.358	0.657	0.672	0.663	0.682	0.683	0.702	0.698	0.686	0.571	0.659	0.636	0.616	0.558	0.655	0.625	0.653	0.663
	19:10:09	29.4	0.091	0.703	0.68	0.664	0.661	0.646	0.544	0.656	0.62	0.68	0.566	0.091	0.655	0.628	0.68	0.644	0.651	0.093	0.655	0.661	0.664	0.652	0.666	0.586	0.687	0.64	0.637	0.527	0.65	1.359	0.658	0.673	0.664	0.682	0.685	0.703	0.699	0.687	0.572	0.661	0.636	0.618	0.559	0.655	0.625	0.653	0.664
	19:15:09	29.4	0.091	0.704	0.681	0.665	0.662	0.647	0.545	0.656	0.621	0.681	0.568	0.091	0.657	0.629	0.681	0.645	0.653	0.093	0.656	0.662	0.665	0.654	0.668	0.587	0.689	0.641	0.639	0.529	0.651	1.359	0.659	0.675	0.666	0.684	0.686	0.706	0.699	0.69	0.574	0.661	0.637	0.62	0.561	0.657	0.627	0.655	0.667
	19:20:09	29.4	0.091	0.705	0.682	0.666	0.663	0.648	0.547	0.657	0.622	0.683	0.571	0.091	0.657	0.632	0.682	0.645	0.654	0.093	0.656	0.663	0.666	0.655	0.668	0.588	0.69	0.643	0.64	0.53	0.653	1.358	0.66	0.675	0.667	0.685	0.687	0.707	0.7	0.693	0.575	0.663	0.637	0.621	0.561	0.658	0.627	0.656	0.667
	19:25:09	29.4	0.091	0.706	0.683	0.667	0.664	0.649	0.548	0.657	0.624	0.683	0.573	0.091	0.658	0.633	0.683	0.645	0.655	0.093	0.657	0.664	0.667	0.655	0.669	0.589	0.691	0.643	0.641	0.531	0.654	1.358	0.661	0.676	0.668	0.685	0.688	0.708	0.702	0.693	0.576	0.664	0.637	0.621	0.562	0.658	0.627	0.656	0.669
	19:30:09	29.4	0.091	0.708	0.685	0.67	0.666	0.65	0.55	0.66	0.625	0.684	0.575	0.091	0.658	0.635	0.684	0.647	0.656	0.093	0.659	0.666	0.668	0.656	0.671	0.592	0.692	0.645	0.642	0.532	0.655	1.358	0.663	0.678	0.669	0.687	0.69	0.709	0.702	0.694	0.577	0.662	0.639	0.622	0.563	0.66	0.628	0.657	0.671
	19:35:09	29.4	0.091	0.709	0.684	0.67	0.667	0.651	0.551	0.66	0.626	0.685	0.576	0.091	0.659	0.634	0.685	0.648	0.657	0.093	0.659	0.669	0.669	0.658	0.672	0.594	0.694	0.645	0.643	0.533	0.656	1.357	0.664	0.679	0.669	0.687	0.691	0.71	0.702	0.695	0.578	0.661	0.64	0.623	0.565	0.661	0.629	0.658	0.672
	19:40:09	29.4	0.091	0.71	0.684	0.669	0.667	0.651	0.551	0.66	0.626	0.685	0.576	0.091	0.66	0.633	0.686	0.648	0.657	0.092	0.659	0.67	0.67	0.658	0.673	0.593	0.695	0.646	0.642	0.534	0.656	1.357	0.664	0.68	0.67	0.689	0.692	0.711	0.702	0.696	0.578	0.663	0.641	0.623	0.566	0.662	0.629	0.66	0.673
	19:45:09	29.4	0.091	0.712	0.687	0.671	0.67	0.654	0.554	0.663	0.628	0.686	0.579	0.091	0.662	0.633	0.687	0.65	0.658	0.093	0.661	0.671	0.671	0.66	0.674	0.596	0.696	0.648	0.644	0.535	0.658	1.357	0.666	0.682	0.672	0.69	0.694	0.712	0.704	0.699	0.58	0.664	0.642	0.625	0.568	0.663	0.631	0.661	0.675
	19:50:09	29.4	0.091	0.712	0.687	0.671	0.67	0.653	0.554	0.663	0.63	0.685	0.578	0.091	0.663	0.634	0.686	0.653	0.658	0.092	0.662	0.672	0.672	0.66	0.673	0.597	0.696	0.65	0.645	0.535	0.659	1.355	0.668	0.682	0.673	0.69	0.695	0.713	0.704	0.7	0.582	0.667	0.642	0.626	0.57	0.664	0.631	0.661	0.675
	19:55:09	29.4	0.091	0.713	0.689	0.672	0.67	0.654	0.555	0.663	0.631	0.687	0.578	0.091	0.664	0.634	0.687	0.652	0.659	0.093	0.663	0.673	0.673	0.661	0.675	0.597	0.697	0.652	0.645	0.536	0.66	1.356	0.668	0.683	0.674	0.692	0.696	0.714	0.707	0.702	0.584	0.668	0.643	0.627	0.571	0.665	0.631	0.662	0.677
	20:00:09	29.4	0.091	0.715	0.691	0.674	0.671	0.656	0.556	0.665	0.632	0.687	0.583	0.091	0.666	0.635	0.689	0.653	0.66	0.092	0.665	0.675	0.674	0.662	0.676	0.599	0.699	0.654	0.646	0.538	0.661	1.355	0.67	0.683	0.675	0.693	0.698	0.714	0.709	0.702	0.586	0.668	0.643	0.629	0.573	0.666	0.632	0.664	0.678
	20:05:09	29.4	0.091	0.716	0.692	0.676	0.671	0.657	0.557	0.666	0.633	0.688	0.583	0.091	0.668	0.635	0.69	0.654	0.661	0.092	0.666	0.676	0.675	0.663	0.677	0.6	0.699	0.655	0.648	0.539	0.662	1.356	0.671	0.684	0.676	0.694	0.699	0.716	0.713	0.704	0.588	0.668	0.644	0.63	0.575	0.668	0.633	0.665	0.678
	20:10:09	29.4	0.091	0.717	0.694	0.678	0.672	0.658	0.559	0.667	0.636	0.69	0.584	0.091	0.669	0.637	0.691	0.656	0.662	0.093	0.666	0.677	0.676	0.664	0.678	0.603	0.698	0.654	0.649	0.54	0.663	1.356	0.672	0.684	0.677	0.695	0.701	0.717	0.713	0.704	0.587	0.669	0.644	0.63	0.576	0.668	0.633	0.666	0.679
	20:15:09	29.4	0.091	0.717	0.694	0.677	0.673	0.658	0.559	0.668	0.635	0.689	0.584	0.091	0.669	0.639	0.691	0.657	0.663	0.092	0.666	0.677	0.676	0.664	0.679	0.602	0.698	0.653	0.648	0.54	0.663	1.355	0.673	0.684	0.677	0.695	0.7	0.718	0.714	0.706	0.588	0.67	0.645	0.63	0.578	0.67	0.633	0.666	0.681
	20:20:09	29.4	0.091	0.719	0.694	0.68	0.676	0.66	0.561	0.67	0.637	0.691	0.585	0.091	0.669	0.641	0.694	0.658	0.665	0.092	0.669	0.678	0.678	0.666	0.681	0.604	0.698	0.653	0.65	0.542	0.664	1.354	0.674	0.686	0.68	0.697	0.702	0.721	0.716	0.707	0.589	0.674	0.645	0.634	0.579	0.671	0.634	0.67	0.683
	20:25:09	29.4	0.091	0.72	0.696	0.681	0.675	0.66	0.562	0.671	0.637	0.691	0.587	0.091	0.669	0.642	0.694	0.659	0.665	0.092	0.668	0.68	0.678	0.667	0.681	0.607	0.698	0.653	0.65	0.544	0.665	1.354	0.676	0.687	0.681	0.698	0.703	0.721	0.72	0.707	0.589	0.674	0.646	0.634	0.579	0.672	0.634	0.67	0.683
	20:30:09	29.4	0.091	0.721	0.696	0.682	0.677	0.661	0.564	0.672	0.638	0.692	0.587	0.091	0.669	0.644	0.697	0.66	0.666	0.092	0.67	0.682	0.68	0.667	0.683	0.607	0.7	0.654	0.651	0.545	0.666	1.353	0.677	0.687	0.681	0.699	0.706	0.722	0.724	0.708	0.591	0.674	0.647	0.635	0.582	0.674	0.635	0.671	0.686
	20:35:09	29.4	0.091	0.724	0.699	0.684	0.679	0.663	0.567	0.675	0.64	0.693	0.589	0.091	0.669	0.645	0.699	0.662	0.667	0.092	0.671	0.682	0.681	0.668	0.685	0.609	0.701	0.656	0.652	0.547	0.668	1.354	0.679	0.689	0.683	0.7	0.707	0.724	0.724	0.71	0.593	0.675	0.648	0.636	0.583	0.674	0.636	0.673	0.688
	20:40:09	29.4	0.091	0.725	0.7	0.685	0.68	0.664	0.567	0.674	0.641	0.694	0.592	0.091	0.671	0.645	0.7	0.661	0.667	0.092	0.672	0.682	0.682	0.669	0.685	0.611	0.703	0.657	0.653	0.549	0.669	1.354	0.68	0.69	0.684	0.701	0.708	0.725	0.724	0.711	0.594	0.676	0.65	0.637	0.585	0.675	0.636	0.673	0.689
	20:45:09	29.4	0.091	0.725	0.7	0.684	0.681	0.664	0.568	0.673	0.641	0.694	0.59	0.091	0.672	0.645	0.702	0.661	0.667	0.092	0.672	0.683	0.683	0.669	0.686	0.612	0.704	0.657	0.654	0.549	0.669	1.353	0.681	0.69	0.685	0.702	0.709	0.727	0.731	0.712	0.596	0.677	0.651	0.638	0.585	0.675	0.637	0.675	0.69
	20:50:09	29.4	0.091	0.726	0.702	0.686	0.682	0.665	0.571	0.676	0.641	0.695	0.594	0.091	0.673	0.644	0.703	0.663	0.669	0.092	0.674	0.684	0.684	0.67	0.687	0.611	0.707	0.659	0.655	0.551	0.67	1.353	0.682	0.691	0.686	0.703	0.711	0.728	0.73	0.713	0.597	0.679	0.65	0.638	0.587	0.677	0.638	0.676	0.692
	20:55:09	29.4	0.091	0.727	0.702	0.686	0.683	0.667	0.571	0.677	0.641	0.696	0.593	0.091	0.674	0.645	0.705	0.664	0.67	0.092	0.675	0.685	0.685	0.672	0.688	0.613	0.71	0.66	0.655	0.551	0.67	1.352	0.684	0.693	0.687	0.704	0.712	0.73	0.73	0.713	0.599	0.681	0.652	0.64	0.588	0.678	0.64	0.677	0.693
	21:00:09	29.4	0.091	0.728	0.703	0.687	0.684	0.668	0.572	0.675	0.642	0.697	0.596	0.091	0.674	0.647	0.706	0.665	0.671	0.092	0.674	0.685	0.685	0.672	0.69	0.615	0.712	0.661	0.655	0.553	0.67	1.352	0.686	0.694	0.689	0.706	0.713	0.732	0.729	0.715	0.601	0.682	0.653	0.64	0.589	0.679	0.641	0.679	0.693
	21:05:09	29.5	0.091	0.73	0.704	0.689	0.684	0.669	0.574	0.678	0.643	0.697	0.598	0.091	0.676	0.65	0.708	0.667	0.673	0.092	0.676	0.687	0.687	0.673	0.69	0.616	0.713	0.662	0.655	0.554	0.671	1.352	0.686	0.695	0.69	0.707	0.714	0.733	0.732	0.718	0.603	0.682	0.654	0.642	0.59	0.68	0.641	0.68	0.695
	21:10:09	29.4	0.091	0.731	0.706	0.69	0.685	0.669	0.576	0.681	0.645	0.698	0.6	0.091	0.678	0.65	0.708	0.666	0.673	0.092	0.678	0.686	0.687	0.674	0.691	0.617	0.714	0.662	0.656	0.554	0.672	1.353	0.687	0.695	0.69	0.707	0.715	0.733	0.734	0.719	0.604	0.682	0.654	0.642	0.591	0.681	0.641	0.68	0.696
	21:15:09	29.5	0.091	0.732	0.708	0.691	0.686	0.671	0.577	0.68	0.646	0.7	0.605	0.091	0.681	0.649	0.709	0.667	0.674	0.092	0.68	0.687	0.688	0.675	0.694	0.619	0.714	0.662	0.657	0.555	0.673	1.352	0.689	0.696	0.691	0.709	0.716	0.734	0.735	0.721	0.604	0.682	0.654	0.643	0.591	0.682	0.641	0.681	0.697
	21:20:09	29.5	0.091	0.733	0.709	0.691	0.688	0.672	0.577	0.68	0.646	0.701	0.6	0.091	0.682	0.649	0.71	0.668	0.675	0.092	0.679	0.69	0.69	0.676	0.694	0.619	0.716	0.663	0.657	0.556	0.674	1.351	0.689	0.698	0.693	0.71	0.718	0.736	0.736	0.723	0.606	0.682	0.655	0.643	0.591	0.683	0.642	0.683	0.697
	21:25:09	29.5	0.091	0.734	0.71	0.692	0.688	0.672	0.579	0.679	0.648	0.701	0.604	0.091	0.686	0.649	0.711	0.669	0.675	0.092	0.68	0.691	0.69	0.676	0.695	0.62	0.716	0.663	0.658	0.557	0.675	1.351	0.691	0.698	0.694	0.711	0.718	0.735	0.738	0.724	0.606	0.683	0.655	0.644	0.593	0.684	0.643	0.683	0.698
	21:30:09	29.5	0.091	0.735	0.712	0.694	0.69	0.673	0.581	0.682	0.649	0.701	0.603	0.091	0.688	0.651	0.713	0.671	0.677	0.092	0.682	0.693	0.692	0.677	0.697	0.621	0.718	0.664	0.66	0.559	0.676	1.351	0.693	0.7	0.696	0.712	0.721	0.736	0.742	0.723	0.607	0.684	0.656	0.645	0.595	0.686	0.645	0.685	0.699
	21:35:09	29.5	0.091	0.735	0.712	0.694	0.691	0.674	0.581	0.682	0.648	0.703	0.602	0.091	0.69	0.653	0.714	0.672	0.678	0.092	0.684	0.694	0.692	0.678	0.698	0.622	0.718	0.663	0.66	0.559	0.676	1.351	0.694	0.701	0.697	0.712	0.722	0.738	0.745	0.724	0.607	0.685	0.657	0.646	0.595	0.686	0.645	0.687	0.7
	21:40:09	29.5	0.091	0.736	0.713	0.695	0.691	0.675	0.583	0.682	0.65	0.703	0.603	0.091	0.692	0.654	0.715	0.673	0.678	0.092	0.687	0.694	0.694	0.68	0.699	0.623	0.719	0.663	0.662	0.561	0.677	1.349	0.695	0.703	0.699	0.714	0.723	0.739	0.749	0.725	0.608	0.686	0.657	0.648	0.595	0.689	0.646	0.688	0.702
	21:45:09	29.5	0.091	0.738	0.714	0.696	0.692	0.676	0.584	0.684	0.652	0.704	0.604	0.091	0.694	0.654	0.716	0.676	0.68	0.092	0.685	0.694	0.696	0.681	0.701	0.624	0.72	0.664	0.663	0.561	0.678	1.348	0.696	0.704	0.7	0.715	0.725	0.739	0.749	0.726	0.608	0.688	0.658	0.65	0.596	0.69	0.646	0.689	0.704
	21:50:09	29.5	0.091	0.739	0.716	0.697	0.692	0.677	0.585	0.686	0.654	0.705	0.606	0.091	0.694	0.653	0.717	0.676	0.681	0.092	0.686	0.694	0.696	0.681	0.701	0.625	0.72	0.664	0.664	0.562	0.68	1.349	0.698	0.705	0.702	0.716	0.727	0.741	0.751	0.727	0.61	0.688	0.66	0.651	0.596	0.691	0.646	0.69	0.705
	21:55:09	29.5	0.091	0.741	0.717	0.698	0.694	0.678	0.585	0.685	0.655	0.705	0.606	0.091	0.697	0.654	0.719	0.677	0.682	0.092	0.687	0.695	0.697	0.682	0.703	0.626	0.72	0.666	0.665	0.563	0.68	1.349	0.699	0.706	0.703	0.717	0.728	0.741	0.753	0.729	0.611	0.688	0.66	0.65	0.597	0.691	0.647	0.691	0.706
	22:00:09	29.5	0.091	0.743	0.718	0.699	0.695	0.678	0.586	0.686	0.656	0.707	0.606	0.091	0.698	0.654	0.721	0.678	0.682	0.092	0.688	0.696	0.697	0.682	0.703	0.627	0.721	0.667	0.666	0.564	0.682	1.349	0.7	0.706	0.703	0.717	0.729	0.743	0.756	0.73	0.611	0.688	0.661	0.651	0.599	0.693	0.647	0.693	0.707
	22:05:09	29.5	0.091	0.743	0.719	0.701	0.694	0.68	0.587	0.686	0.657	0.707	0.607	0.091	0.697	0.656	0.722	0.679	0.683	0.092	0.689	0.697	0.698	0.683	0.704	0.628	0.722	0.669	0.665	0.565	0.683	1.348	0.702	0.708	0.704	0.718	0.73	0.743	0.759	0.732	0.611	0.689	0.661	0.652	0.601	0.694	0.649	0.694	0.708
	22:10:09	29.5	0.091	0.745	0.721	0.704	0.696	0.681	0.589	0.69	0.659	0.707	0.609	0.091	0.696	0.656	0.723	0.68	0.684	0.092	0.69	0.698	0.699	0.684	0.705	0.629	0.722	0.67	0.665	0.567	0.684	1.348	0.703	0.709	0.705	0.719	0.731	0.743	0.761	0.735	0.612	0.69	0.662	0.653	0.604	0.695	0.65	0.695	0.709
	22:15:09	29.5	0.091	0.747	0.722	0.705	0.698	0.683	0.59	0.691	0.66	0.709	0.61	0.091	0.697	0.657	0.724	0.68	0.686	0.092	0.692	0.7	0.7	0.685	0.708	0.631	0.724	0.673	0.667	0.567	0.686	1.348	0.704	0.711	0.707	0.721	0.733	0.745	0.762	0.735	0.613	0.692	0.663	0.654	0.605	0.696	0.651	0.697	0.71
	22:20:09	29.5	0.091	0.747	0.724	0.706	0.7	0.685	0.591	0.691	0.661	0.711	0.612	0.091	0.699	0.658	0.726	0.68	0.687	0.092	0.692	0.7	0.7	0.686	0.709	0.632	0.727	0.675	0.668	0.568	0.686	1.347	0.705	0.712	0.708	0.721	0.733	0.746	0.764	0.738	0.614	0.694	0.664	0.655	0.605	0.697	0.653	0.698	0.712
	22:25:09	29.5	0.091	0.748	0.725	0.707	0.7	0.686	0.594	0.692	0.662	0.71	0.613	0.091	0.7	0.658	0.728	0.682	0.689	0.092	0.694	0.701	0.702	0.687	0.71	0.633	0.728	0.677	0.669	0.57	0.687	1.346	0.707	0.713	0.71	0.723	0.735	0.746	0.766	0.739	0.615	0.695	0.665	0.656	0.606	0.699	0.653	0.699	0.712
	22:30:09	29.5	0.091	0.748	0.727	0.709	0.701	0.688	0.597	0.695	0.664	0.713	0.615	0.091	0.703	0.659	0.729	0.683	0.69	0.092	0.696	0.702	0.704	0.689	0.712	0.634	0.732	0.68	0.67	0.572	0.689	1.346	0.709	0.715	0.712	0.725	0.737	0.749	0.768	0.739	0.617	0.697	0.667	0.657	0.607	0.7	0.654	0.7	0.714
	22:35:09	29.5	0.091	0.747	0.727	0.709	0.7	0.688	0.597	0.693	0.664	0.713	0.614	0.091	0.704	0.661	0.73	0.684	0.691	0.092	0.698	0.704	0.704	0.689	0.713	0.636	0.734	0.681	0.671	0.572	0.69	1.346	0.709	0.716	0.712	0.725	0.737	0.749	0.77	0.74	0.617	0.697	0.667	0.658	0.608	0.701	0.655	0.7	0.714
	22:40:09	29.5	0.091	0.749	0.729	0.709	0.701	0.688	0.597	0.693	0.665	0.714	0.614	0.091	0.704	0.663	0.73	0.684	0.691	0.092	0.698	0.705	0.705	0.691	0.714	0.636	0.736	0.684	0.671	0.574	0.69	1.345	0.71	0.717	0.713	0.726	0.738	0.75	0.771	0.742	0.619	0.698	0.668	0.659	0.61	0.702	0.656	0.702	0.715
	22:45:09	29.5	0.091	0.751	0.731	0.711	0.703	0.69	0.598	0.693	0.667	0.715	0.617	0.091	0.706	0.664	0.73	0.686	0.692	0.092	0.699	0.705	0.706	0.691	0.716	0.638	0.737	0.686	0.673	0.575	0.692	1.345	0.711	0.719	0.714	0.727	0.74	0.751	0.773	0.743	0.621	0.7	0.669	0.661	0.611	0.703	0.659	0.703	0.717
	22:50:09	29.5	0.091	0.752	0.731	0.711	0.704	0.69	0.6	0.695	0.667	0.716	0.618	0.091	0.708	0.663	0.732	0.686	0.692	0.092	0.7	0.706	0.707	0.691	0.716	0.638	0.739	0.688	0.673	0.575	0.692	1.344	0.712	0.72	0.714	0.728	0.741	0.752	0.773	0.745	0.622	0.7	0.671	0.662	0.612	0.704	0.661	0.704	0.718
	22:55:09	29.5	0.091	0.753	0.733	0.713	0.706	0.692	0.6	0.696	0.669	0.718	0.617	0.091	0.711	0.662	0.733	0.687	0.693	0.092	0.7	0.708	0.707	0.693	0.717	0.64	0.741	0.691	0.674	0.576	0.694	1.344	0.714	0.721	0.715	0.729	0.742	0.753	0.774	0.747	0.624	0.699	0.672	0.663	0.612	0.706	0.662	0.705	0.718
	23:00:09	29.5	0.091	0.754	0.734	0.715	0.708	0.695	0.602	0.698	0.67	0.718	0.619	0.091	0.712	0.662	0.734	0.689	0.694	0.092	0.701	0.71	0.709	0.695	0.719	0.641	0.741	0.693	0.676	0.578	0.695	1.344	0.715	0.723	0.718	0.731	0.744	0.753	0.776	0.748	0.626	0.7	0.674	0.665	0.614	0.708	0.665	0.707	0.72
	23:05:09	29.5	0.091	0.755	0.735	0.713	0.708	0.695	0.603	0.696	0.671	0.72	0.618	0.091	0.712	0.663	0.734	0.689	0.695	0.092	0.703	0.711	0.71	0.695	0.721	0.642	0.743	0.693	0.677	0.579	0.696	1.343	0.717	0.724	0.719	0.732	0.745	0.754	0.777	0.75	0.626	0.7	0.674	0.667	0.614	0.709	0.666	0.707	0.721
	23:10:09	29.5	0.091	0.756	0.736	0.714	0.709	0.697	0.604	0.699	0.672	0.72	0.621	0.091	0.713	0.664	0.736	0.69	0.697	0.092	0.704	0.712	0.711	0.697	0.722	0.642	0.744	0.694	0.679	0.581	0.697	1.343	0.718	0.726	0.721	0.733	0.746	0.755	0.779	0.75	0.627	0.702	0.676	0.668	0.616	0.709	0.669	0.708	0.722
	23:15:09	29.5	0.091	0.757	0.737	0.715	0.71	0.698	0.606	0.702	0.673	0.722	0.622	0.091	0.714	0.665	0.736	0.691	0.697	0.092	0.705	0.713	0.712	0.698	0.722	0.643	0.745	0.695	0.679	0.581	0.698	1.343	0.719	0.728	0.721	0.734	0.747	0.756	0.78	0.751	0.629	0.703	0.677	0.669	0.617	0.71	0.67	0.709	0.724
	23:20:09	29.5	0.091	0.759	0.738	0.717	0.712	0.699	0.607	0.7	0.675	0.722	0.621	0.091	0.715	0.669	0.737	0.691	0.698	0.092	0.706	0.715	0.712	0.698	0.724	0.645	0.747	0.696	0.68	0.583	0.698	1.343	0.719	0.729	0.722	0.736	0.749	0.757	0.782	0.752	0.63	0.703	0.679	0.671	0.619	0.712	0.672	0.709	0.724
	23:25:09	29.5	0.091	0.76	0.74	0.719	0.712	0.701	0.607	0.701	0.676	0.724	0.622	0.091	0.718	0.67	0.739	0.693	0.699	0.092	0.708	0.716	0.713	0.701	0.725	0.645	0.749	0.698	0.681	0.585	0.699	1.342	0.722	0.73	0.724	0.737	0.75	0.758	0.785	0.753	0.631	0.705	0.68	0.672	0.621	0.712	0.675	0.71	0.727
	23:30:09	29.5	0.091	0.761	0.741	0.72	0.713	0.702	0.61	0.701	0.677	0.725	0.622	0.091	0.719	0.67	0.74	0.693	0.701	0.092	0.708	0.716	0.714	0.702	0.726	0.646	0.751	0.699	0.682	0.585	0.7	1.342	0.723	0.731	0.725	0.738	0.752	0.76	0.786	0.754	0.633	0.707	0.681	0.673	0.622	0.713	0.676	0.71	0.728
	23:35:09	29.5	0.091	0.762	0.744	0.722	0.714	0.704	0.61	0.704	0.679	0.726	0.623	0.091	0.721	0.669	0.742	0.694	0.701	0.092	0.71	0.718	0.715	0.703	0.728	0.647	0.755	0.699	0.683	0.586	0.701	1.341	0.724	0.732	0.725	0.739	0.754	0.76	0.788	0.755	0.635	0.706	0.681	0.674	0.624	0.715	0.678	0.711	0.728
	23:40:09	29.5	0.091	0.763	0.745	0.723	0.715	0.706	0.611	0.704	0.68	0.729	0.625	0.091	0.722	0.671	0.744	0.697	0.702	0.092	0.711	0.719	0.716	0.705	0.729	0.648	0.758	0.7	0.685	0.587	0.703	1.341	0.725	0.733	0.727	0.74	0.755	0.761	0.79	0.756	0.636	0.708	0.684	0.676	0.625	0.717	0.681	0.713	0.729
	23:45:09	29.5	0.091	0.765	0.746	0.723	0.716	0.706	0.611	0.706	0.68	0.729	0.626	0.091	0.724	0.671	0.747	0.698	0.703	0.092	0.712	0.72	0.717	0.704	0.73	0.649	0.761	0.701	0.687	0.588	0.704	1.341	0.726	0.734	0.729	0.741	0.756	0.762	0.792	0.758	0.638	0.709	0.685	0.677	0.625	0.717	0.685	0.714	0.73
	23:50:09	29.5	0.091	0.765	0.748	0.724	0.717	0.707	0.613	0.707	0.683	0.731	0.627	0.091	0.724	0.674	0.749	0.698	0.705	0.092	0.713	0.721	0.718	0.706	0.733	0.651	0.763	0.703	0.689	0.589	0.705	1.34	0.728	0.735	0.73	0.743	0.757	0.763	0.793	0.759	0.639	0.71	0.686	0.678	0.625	0.719	0.688	0.714	0.732
	23:55:09	29.5	0.091	0.766	0.748	0.725	0.718	0.708	0.614	0.707	0.684	0.732	0.627	0.091	0.727	0.687	0.75	0.698	0.705	0.092	0.715	0.722	0.718	0.709	0.732	0.652	0.765	0.704	0.69	0.591	0.706	1.34	0.729	0.736	0.73	0.743	0.758	0.764	0.794	0.76	0.639	0.71	0.688	0.679	0.625	0.719	0.687	0.715	0.732
	1 day, 0:00:09	29.5	0.091	0.767	0.749	0.726	0.719	0.71	0.615	0.708	0.684	0.733	0.627	0.091	0.729	0.679	0.751	0.7	0.706	0.092	0.716	0.723	0.721	0.709	0.733	0.653	0.767	0.704	0.692	0.592	0.707	1.34	0.731	0.738	0.733	0.744	0.759	0.766	0.795	0.762	0.639	0.713	0.689	0.681	0.626	0.72	0.689	0.716	0.732
	1 day, 0:05:09	29.5	0.091	0.769	0.75	0.726	0.72	0.711	0.615	0.708	0.684	0.733	0.628	0.091	0.73	0.673	0.753	0.701	0.707	0.092	0.716	0.724	0.722	0.71	0.734	0.654	0.768	0.705	0.693	0.592	0.708	1.339	0.732	0.739	0.733	0.745	0.76	0.766	0.795	0.763	0.639	0.715	0.69	0.683	0.627	0.723	0.694	0.718	0.735
	1 day, 0:10:09	29.5	0.091	0.769	0.752	0.727	0.72	0.711	0.617	0.709	0.687	0.734	0.629	0.091	0.731	0.678	0.753	0.701	0.708	0.092	0.718	0.724	0.724	0.711	0.737	0.654	0.769	0.707	0.694	0.594	0.711	1.338	0.734	0.74	0.735	0.746	0.763	0.765	0.797	0.764	0.639	0.714	0.691	0.684	0.629	0.724	0.695	0.718	0.736
	1 day, 0:15:09	29.5	0.091	0.771	0.753	0.729	0.723	0.714	0.617	0.711	0.688	0.736	0.63	0.091	0.731	0.68	0.754	0.702	0.709	0.092	0.72	0.726	0.726	0.714	0.738	0.656	0.771	0.709	0.695	0.595	0.712	1.338	0.736	0.741	0.737	0.747	0.764	0.766	0.798	0.766	0.64	0.715	0.693	0.686	0.632	0.724	0.696	0.719	0.737
	1 day, 0:20:09	29.5	0.091	0.771	0.755	0.729	0.723	0.715	0.619	0.712	0.689	0.737	0.63	0.091	0.732	0.687	0.755	0.703	0.71	0.092	0.72	0.726	0.726	0.714	0.739	0.656	0.773	0.711	0.697	0.596	0.711	1.338	0.737	0.742	0.737	0.749	0.765	0.767	0.8	0.768	0.641	0.717	0.695	0.687	0.633	0.726	0.7	0.72	0.738
	1 day, 0:25:09	29.5	0.091	0.772	0.754	0.73	0.724	0.716	0.619	0.712	0.689	0.739	0.631	0.091	0.732	0.683	0.756	0.704	0.71	0.092	0.721	0.728	0.728	0.715	0.741	0.658	0.774	0.712	0.699	0.597	0.713	1.337	0.736	0.743	0.74	0.749	0.767	0.77	0.8	0.77	0.642	0.718	0.696	0.688	0.633	0.728	0.702	0.721	0.739
	1 day, 0:30:09	29.5	0.091	0.774	0.756	0.732	0.726	0.718	0.621	0.714	0.692	0.74	0.632	0.091	0.733	0.688	0.757	0.705	0.711	0.092	0.724	0.73	0.73	0.718	0.742	0.659	0.775	0.713	0.7	0.598	0.714	1.337	0.739	0.745	0.742	0.75	0.768	0.771	0.8	0.771	0.644	0.718	0.697	0.69	0.634	0.728	0.704	0.721	0.74
	1 day, 0:35:09	29.5	0.091	0.775	0.757	0.732	0.726	0.718	0.622	0.716	0.693	0.741	0.631	0.091	0.734	0.689	0.757	0.706	0.711	0.092	0.725	0.731	0.73	0.719	0.743	0.659	0.776	0.714	0.702	0.599	0.715	1.336	0.74	0.747	0.743	0.751	0.769	0.772	0.8	0.771	0.646	0.719	0.697	0.69	0.635	0.73	0.705	0.722	0.741
	1 day, 0:40:09	29.5	0.091	0.776	0.759	0.734	0.727	0.72	0.622	0.718	0.695	0.742	0.632	0.091	0.734	0.689	0.758	0.707	0.712	0.092	0.727	0.734	0.731	0.72	0.744	0.659	0.777	0.715	0.704	0.601	0.716	1.336	0.742	0.749	0.744	0.752	0.771	0.774	0.801	0.772	0.646	0.721	0.698	0.691	0.635	0.731	0.707	0.723	0.742
	1 day, 0:45:09	29.5	0.091	0.777	0.761	0.735	0.728	0.721	0.624	0.719	0.697	0.745	0.635	0.091	0.736	0.69	0.759	0.709	0.714	0.092	0.729	0.735	0.732	0.721	0.746	0.661	0.778	0.717	0.705	0.602	0.718	1.335	0.743	0.751	0.746	0.753	0.773	0.775	0.802	0.772	0.648	0.722	0.699	0.693	0.636	0.733	0.709	0.725	0.744
	1 day, 0:50:09	29.5	0.091	0.778	0.763	0.736	0.729	0.722	0.625	0.721	0.698	0.746	0.634	0.091	0.737	0.689	0.761	0.709	0.715	0.092	0.73	0.736	0.733	0.722	0.748	0.661	0.78	0.719	0.707	0.603	0.72	1.335	0.744	0.752	0.748	0.754	0.774	0.776	0.803	0.772	0.649	0.722	0.7	0.694	0.638	0.733	0.712	0.725	0.746
	1 day, 0:55:09	29.5	0.091	0.779	0.763	0.737	0.731	0.723	0.625	0.722	0.699	0.747	0.635	0.091	0.738	0.692	0.763	0.709	0.717	0.092	0.73	0.737	0.736	0.723	0.749	0.662	0.781	0.72	0.708	0.604	0.721	1.335	0.745	0.753	0.75	0.755	0.776	0.779	0.804	0.774	0.65	0.723	0.701	0.696	0.64	0.735	0.713	0.725	0.748
	1 day, 1:00:09	29.5	0.091	0.78	0.764	0.738	0.733	0.724	0.626	0.722	0.7	0.747	0.637	0.091	0.739	0.695	0.765	0.71	0.719	0.092	0.732	0.738	0.736	0.724	0.75	0.662	0.782	0.721	0.71	0.605	0.722	1.334	0.747	0.754	0.75	0.756	0.776	0.78	0.805	0.775	0.651	0.722	0.702	0.697	0.64	0.737	0.714	0.727	0.748
	1 day, 1:05:09	29.5	0.091	0.781	0.766	0.74	0.734	0.726	0.628	0.725	0.701	0.75	0.637	0.091	0.74	0.699	0.767	0.712	0.72	0.092	0.734	0.74	0.738	0.727	0.752	0.665	0.784	0.722	0.712	0.606	0.723	1.333	0.748	0.756	0.753	0.758	0.777	0.781	0.805	0.776	0.653	0.725	0.704	0.698	0.641	0.738	0.715	0.728	0.749
	1 day, 1:10:09	29.5	0.091	0.784	0.768	0.743	0.737	0.729	0.63	0.727	0.703	0.751	0.638	0.091	0.742	0.703	0.768	0.714	0.722	0.092	0.735	0.742	0.738	0.729	0.753	0.666	0.786	0.725	0.713	0.608	0.725	1.334	0.75	0.758	0.754	0.76	0.78	0.783	0.807	0.777	0.655	0.727	0.706	0.7	0.642	0.739	0.716	0.729	0.75
	1 day, 1:15:09	29.5	0.091	0.784	0.769	0.743	0.738	0.729	0.63	0.729	0.705	0.752	0.639	0.091	0.744	0.707	0.768	0.716	0.721	0.091	0.736	0.743	0.739	0.729	0.754	0.666	0.787	0.728	0.714	0.609	0.725	1.333	0.751	0.76	0.756	0.76	0.781	0.785	0.807	0.779	0.656	0.726	0.707	0.701	0.643	0.741	0.717	0.73	0.751
	1 day, 1:20:09	29.5	0.091	0.786	0.769	0.744	0.74	0.73	0.63	0.729	0.705	0.753	0.64	0.091	0.745	0.71	0.769	0.717	0.722	0.091	0.738	0.743	0.741	0.73	0.756	0.667	0.789	0.73	0.715	0.609	0.726	1.332	0.752	0.761	0.755	0.761	0.782	0.786	0.809	0.782	0.657	0.726	0.708	0.702	0.643	0.742	0.718	0.732	0.753
	1 day, 1:25:09	29.5	0.091	0.788	0.77	0.745	0.741	0.731	0.631	0.732	0.706	0.755	0.641	0.091	0.746	0.713	0.771	0.718	0.723	0.092	0.739	0.745	0.743	0.732	0.758	0.668	0.79	0.731	0.716	0.61	0.728	1.331	0.753	0.761	0.758	0.762	0.783	0.788	0.811	0.783	0.657	0.727	0.709	0.703	0.644	0.742	0.719	0.734	0.754
	1 day, 1:30:09	29.5	0.091	0.789	0.772	0.747	0.741	0.733	0.633	0.734	0.707	0.756	0.642	0.091	0.748	0.716	0.772	0.719	0.724	0.091	0.742	0.747	0.745	0.734	0.759	0.67	0.79	0.733	0.718	0.612	0.73	1.331	0.755	0.764	0.759	0.764	0.784	0.789	0.813	0.784	0.658	0.728	0.71	0.704	0.645	0.744	0.721	0.736	0.756
	1 day, 1:35:09	29.5	0.091	0.79	0.772	0.747	0.742	0.734	0.633	0.735	0.708	0.756	0.642	0.091	0.75	0.718	0.772	0.719	0.727	0.091	0.743	0.749	0.746	0.735	0.759	0.671	0.791	0.734	0.718	0.612	0.731	1.331	0.755	0.764	0.761	0.764	0.786	0.79	0.815	0.785	0.659	0.73	0.711	0.705	0.645	0.746	0.722	0.738	0.756
	1 day, 1:40:09	29.5	0.091	0.79	0.773	0.749	0.743	0.735	0.633	0.737	0.709	0.758	0.643	0.091	0.751	0.72	0.773	0.719	0.728	0.091	0.744	0.75	0.75	0.737	0.761	0.671	0.792	0.735	0.72	0.613	0.731	1.331	0.757	0.766	0.763	0.766	0.787	0.791	0.816	0.785	0.66	0.73	0.713	0.707	0.646	0.747	0.723	0.741	0.758
	1 day, 1:45:09	29.5	0.091	0.792	0.775	0.75	0.745	0.737	0.635	0.739	0.711	0.761	0.644	0.091	0.752	0.721	0.774	0.72	0.73	0.091	0.746	0.752	0.752	0.738	0.762	0.673	0.793	0.735	0.721	0.615	0.733	1.33	0.758	0.768	0.763	0.768	0.788	0.792	0.816	0.786	0.662	0.731	0.713	0.708	0.647	0.748	0.725	0.743	0.76
	1 day, 1:50:09	29.5	0.091	0.792	0.776	0.752	0.748	0.738	0.636	0.741	0.713	0.762	0.645	0.091	0.753	0.722	0.774	0.721	0.731	0.091	0.748	0.754	0.751	0.74	0.764	0.675	0.795	0.737	0.722	0.616	0.734	1.329	0.759	0.769	0.765	0.769	0.79	0.793	0.816	0.787	0.664	0.732	0.714	0.709	0.649	0.749	0.725	0.744	0.76
	1 day, 1:55:09	29.5	0.091	0.794	0.778	0.753	0.75	0.74	0.637	0.743	0.715	0.763	0.647	0.091	0.754	0.724	0.774	0.722	0.733	0.091	0.748	0.756	0.752	0.742	0.767	0.678	0.796	0.739	0.723	0.616	0.735	1.329	0.761	0.77	0.766	0.771	0.792	0.795	0.815	0.788	0.666	0.733	0.716	0.71	0.651	0.75	0.726	0.745	0.762
	1 day, 2:00:09	29.5	0.091	0.795	0.779	0.754	0.752	0.74	0.638	0.744	0.716	0.763	0.646	0.091	0.755	0.726	0.775	0.722	0.734	0.091	0.748	0.756	0.754	0.742	0.767	0.678	0.796	0.74	0.724	0.618	0.737	1.328	0.763	0.77	0.766	0.772	0.793	0.796	0.814	0.789	0.667	0.735	0.717	0.711	0.652	0.75	0.727	0.746	0.763
	1 day, 2:05:09	29.5	0.091	0.796	0.781	0.755	0.754	0.741	0.638	0.745	0.716	0.765	0.647	0.091	0.755	0.726	0.777	0.723	0.736	0.091	0.75	0.757	0.754	0.743	0.768	0.68	0.797	0.741	0.725	0.618	0.737	1.327	0.763	0.771	0.768	0.773	0.794	0.798	0.815	0.79	0.667	0.739	0.718	0.712	0.651	0.751	0.728	0.747	0.764
	1 day, 2:10:09	29.5	0.091	0.798	0.781	0.756	0.754	0.742	0.639	0.749	0.718	0.765	0.648	0.091	0.755	0.725	0.779	0.722	0.738	0.091	0.751	0.759	0.756	0.745	0.769	0.68	0.798	0.741	0.726	0.619	0.739	1.327	0.765	0.772	0.769	0.774	0.796	0.8	0.817	0.791	0.668	0.743	0.719	0.713	0.652	0.753	0.729	0.75	0.765
	1 day, 2:15:09	29.5	0.091	0.801	0.783	0.758	0.755	0.745	0.641	0.752	0.72	0.767	0.649	0.091	0.757	0.726	0.783	0.723	0.74	0.091	0.754	0.761	0.759	0.747	0.771	0.681	0.799	0.742	0.727	0.62	0.74	1.328	0.766	0.774	0.77	0.776	0.798	0.799	0.819	0.792	0.669	0.744	0.72	0.714	0.653	0.755	0.729	0.751	0.766
	1 day, 2:20:09	29.5	0.091	0.803	0.785	0.76	0.756	0.747	0.643	0.755	0.722	0.769	0.651	0.091	0.757	0.728	0.786	0.726	0.742	0.091	0.757	0.762	0.763	0.748	0.773	0.682	0.8	0.744	0.729	0.621	0.742	1.328	0.768	0.776	0.772	0.777	0.799	0.8	0.822	0.793	0.669	0.743	0.721	0.715	0.654	0.756	0.73	0.752	0.768
	1 day, 2:25:09	29.5	0.091	0.803	0.786	0.76	0.757	0.749	0.643	0.755	0.723	0.771	0.652	0.091	0.758	0.728	0.788	0.727	0.743	0.091	0.758	0.762	0.763	0.749	0.775	0.684	0.801	0.745	0.729	0.622	0.742	1.327	0.769	0.776	0.773	0.777	0.8	0.802	0.823	0.794	0.669	0.743	0.722	0.716	0.655	0.757	0.731	0.752	0.769
	1 day, 2:30:09	29.5	0.091	0.804	0.787	0.761	0.758	0.749	0.643	0.757	0.723	0.771	0.651	0.091	0.759	0.73	0.789	0.727	0.744	0.091	0.757	0.763	0.763	0.75	0.775	0.685	0.803	0.747	0.731	0.624	0.743	1.327	0.77	0.777	0.775	0.779	0.801	0.804	0.824	0.796	0.668	0.745	0.724	0.716	0.655	0.758	0.732	0.753	0.77
	1 day, 2:35:09	29.5	0.091	0.805	0.788	0.762	0.76	0.749	0.642	0.759	0.725	0.772	0.651	0.091	0.759	0.732	0.79	0.728	0.744	0.091	0.759	0.765	0.765	0.752	0.775	0.685	0.804	0.748	0.731	0.624	0.744	1.325	0.771	0.779	0.777	0.781	0.802	0.805	0.824	0.797	0.667	0.746	0.725	0.717	0.656	0.76	0.732	0.754	0.771
	1 day, 2:40:09	29.5	0.091	0.806	0.79	0.764	0.763	0.75	0.644	0.762	0.726	0.773	0.652	0.091	0.76	0.734	0.79	0.731	0.746	0.091	0.76	0.767	0.765	0.753	0.778	0.684	0.805	0.75	0.732	0.626	0.745	1.324	0.772	0.781	0.779	0.783	0.805	0.805	0.825	0.799	0.669	0.748	0.726	0.719	0.658	0.761	0.733	0.756	0.772
	1 day, 2:45:09	29.5	0.091	0.808	0.792	0.765	0.764	0.753	0.645	0.763	0.728	0.773	0.655	0.091	0.761	0.734	0.79	0.734	0.748	0.091	0.761	0.769	0.767	0.755	0.78	0.686	0.806	0.751	0.733	0.627	0.746	1.323	0.775	0.783	0.78	0.785	0.807	0.806	0.828	0.8	0.671	0.749	0.728	0.72	0.659	0.763	0.734	0.758	0.774
	1 day, 2:50:09	29.5	0.091	0.809	0.793	0.766	0.766	0.755	0.647	0.765	0.73	0.774	0.656	0.091	0.762	0.735	0.79	0.735	0.749	0.091	0.763	0.77	0.768	0.756	0.78	0.687	0.807	0.752	0.734	0.627	0.747	1.322	0.776	0.784	0.781	0.786	0.808	0.809	0.83	0.8	0.673	0.751	0.728	0.72	0.66	0.764	0.735	0.759	0.775
	1 day, 2:55:09	29.5	0.091	0.81	0.793	0.767	0.767	0.756	0.646	0.765	0.73	0.775	0.655	0.091	0.763	0.736	0.79	0.734	0.751	0.091	0.765	0.77	0.768	0.757	0.782	0.687	0.809	0.753	0.735	0.627	0.749	1.323	0.776	0.785	0.781	0.787	0.808	0.81	0.831	0.802	0.674	0.752	0.729	0.72	0.66	0.764	0.736	0.76	0.776
	1 day, 3:00:09	29.5	0.09	0.81	0.794	0.768	0.767	0.757	0.647	0.768	0.732	0.778	0.656	0.091	0.765	0.736	0.792	0.735	0.753	0.091	0.766	0.772	0.77	0.76	0.783	0.689	0.809	0.754	0.736	0.627	0.75	1.323	0.776	0.785	0.783	0.788	0.81	0.81	0.832	0.804	0.675	0.754	0.73	0.721	0.662	0.766	0.736	0.761	0.778
	1 day, 3:05:09	29.5	0.091	0.813	0.795	0.77	0.768	0.758	0.649	0.771	0.734	0.779	0.658	0.091	0.767	0.737	0.796	0.736	0.755	0.091	0.767	0.774	0.772	0.761	0.785	0.689	0.811	0.756	0.738	0.627	0.751	1.323	0.779	0.787	0.785	0.79	0.812	0.811	0.833	0.806	0.677	0.756	0.732	0.723	0.664	0.768	0.737	0.763	0.781
	1 day, 3:10:09	29.5	0.091	0.814	0.797	0.771	0.769	0.759	0.649	0.771	0.735	0.781	0.659	0.091	0.767	0.738	0.799	0.735	0.756	0.091	0.768	0.775	0.772	0.763	0.786	0.689	0.811	0.757	0.738	0.628	0.752	1.322	0.781	0.788	0.786	0.791	0.813	0.809	0.835	0.807	0.678	0.756	0.733	0.725	0.665	0.768	0.738	0.765	0.783
	1 day, 3:15:09	29.5	0.091	0.815	0.797	0.772	0.771	0.76	0.65	0.771	0.736	0.782	0.66	0.091	0.767	0.74	0.801	0.735	0.758	0.091	0.769	0.777	0.774	0.764	0.787	0.691	0.812	0.759	0.739	0.629	0.753	1.321	0.782	0.79	0.787	0.793	0.813	0.809	0.838	0.808	0.68	0.756	0.733	0.727	0.665	0.77	0.739	0.766	0.784
	1 day, 3:20:09	29.5	0.09	0.816	0.798	0.773	0.773	0.761	0.651	0.773	0.739	0.784	0.661	0.09	0.769	0.742	0.802	0.738	0.758	0.091	0.771	0.779	0.777	0.765	0.789	0.694	0.813	0.76	0.74	0.631	0.754	1.32	0.783	0.792	0.789	0.795	0.816	0.811	0.839	0.809	0.682	0.756	0.734	0.728	0.667	0.771	0.74	0.767	0.786
	1 day, 3:25:09	29.5	0.09	0.816	0.799	0.773	0.774	0.763	0.651	0.775	0.74	0.784	0.662	0.091	0.771	0.744	0.804	0.742	0.76	0.091	0.771	0.78	0.779	0.766	0.791	0.694	0.814	0.762	0.741	0.632	0.755	1.319	0.784	0.795	0.791	0.796	0.817	0.812	0.841	0.812	0.683	0.757	0.736	0.729	0.668	0.772	0.742	0.768	0.789
	1 day, 3:30:09	29.5	0.09	0.818	0.801	0.775	0.775	0.766	0.653	0.778	0.742	0.786	0.664	0.091	0.773	0.745	0.805	0.744	0.762	0.091	0.773	0.782	0.78	0.768	0.793	0.695	0.815	0.764	0.742	0.634	0.756	1.318	0.786	0.797	0.794	0.798	0.819	0.813	0.845	0.813	0.684	0.758	0.737	0.73	0.67	0.774	0.742	0.77	0.791
	1 day, 3:35:09	29.5	0.09	0.818	0.801	0.776	0.775	0.766	0.653	0.779	0.742	0.786	0.663	0.09	0.774	0.745	0.807	0.745	0.763	0.091	0.774	0.783	0.782	0.768	0.795	0.697	0.817	0.766	0.744	0.634	0.757	1.319	0.786	0.798	0.795	0.799	0.821	0.814	0.845	0.814	0.685	0.759	0.738	0.73	0.671	0.776	0.743	0.771	0.792
	1 day, 3:40:09	29.5	0.091	0.818	0.803	0.778	0.775	0.766	0.653	0.78	0.744	0.786	0.664	0.09	0.775	0.744	0.808	0.745	0.764	0.091	0.776	0.782	0.783	0.769	0.795	0.698	0.819	0.767	0.746	0.635	0.758	1.319	0.787	0.799	0.797	0.801	0.822	0.816	0.844	0.815	0.685	0.76	0.74	0.73	0.671	0.777	0.745	0.772	0.794
	1 day, 3:45:09	29.5	0.09	0.818	0.804	0.78	0.775	0.767	0.654	0.782	0.746	0.788	0.666	0.091	0.775	0.745	0.808	0.746	0.764	0.091	0.778	0.785	0.784	0.771	0.797	0.699	0.819	0.768	0.748	0.636	0.758	1.32	0.79	0.801	0.799	0.802	0.824	0.818	0.843	0.816	0.687	0.763	0.741	0.732	0.672	0.778	0.746	0.773	0.796
	1 day, 3:50:09	29.5	0.09	0.819	0.805	0.781	0.777	0.771	0.656	0.782	0.748	0.789	0.668	0.09	0.777	0.744	0.808	0.748	0.765	0.091	0.777	0.787	0.787	0.773	0.799	0.7	0.819	0.769	0.749	0.637	0.758	1.319	0.792	0.803	0.799	0.804	0.826	0.817	0.846	0.819	0.688	0.765	0.743	0.733	0.673	0.781	0.746	0.774	0.797
	1 day, 3:55:09	29.5	0.09	0.819	0.806	0.783	0.78	0.772	0.657	0.782	0.749	0.789	0.668	0.09	0.778	0.745	0.809	0.75	0.766	0.091	0.779	0.789	0.786	0.774	0.799	0.7	0.821	0.77	0.75	0.639	0.759	1.317	0.793	0.805	0.801	0.806	0.827	0.819	0.848	0.822	0.689	0.767	0.744	0.735	0.674	0.783	0.748	0.775	0.799
	1 day, 4:00:09	29.5	0.091	0.82	0.806	0.784	0.782	0.774	0.657	0.782	0.75	0.791	0.669	0.09	0.779	0.746	0.811	0.753	0.767	0.091	0.782	0.789	0.788	0.775	0.801	0.701	0.822	0.77	0.751	0.64	0.76	1.316	0.795	0.807	0.803	0.808	0.828	0.819	0.85	0.824	0.69	0.767	0.746	0.736	0.675	0.784	0.748	0.777	0.8
	1 day, 4:05:09	29.4	0.091	0.82	0.808	0.785	0.783	0.775	0.658	0.783	0.752	0.792	0.669	0.09	0.783	0.747	0.813	0.756	0.768	0.091	0.783	0.791	0.791	0.776	0.802	0.704	0.823	0.77	0.753	0.641	0.762	1.314	0.796	0.808	0.804	0.809	0.829	0.823	0.85	0.824	0.69	0.768	0.747	0.738	0.675	0.786	0.75	0.779	0.802
	1 day, 4:10:09	29.4	0.09	0.821	0.809	0.787	0.784	0.776	0.66	0.784	0.753	0.793	0.669	0.09	0.786	0.749	0.814	0.757	0.768	0.091	0.784	0.792	0.792	0.777	0.804	0.705	0.825	0.77	0.753	0.641	0.762	1.314	0.797	0.81	0.805	0.811	0.831	0.823	0.852	0.825	0.689	0.769	0.748	0.737	0.676	0.787	0.75	0.781	0.803
	1 day, 4:15:09	29.4	0.09	0.823	0.811	0.789	0.786	0.777	0.661	0.785	0.755	0.793	0.672	0.09	0.791	0.751	0.817	0.758	0.769	0.091	0.785	0.794	0.795	0.779	0.806	0.706	0.826	0.772	0.754	0.642	0.763	1.315	0.799	0.812	0.808	0.813	0.832	0.824	0.854	0.824	0.689	0.769	0.749	0.74	0.676	0.79	0.751	0.782	0.805
	1 day, 4:20:09	29.4	0.091	0.824	0.812	0.79	0.788	0.778	0.663	0.787	0.756	0.794	0.673	0.09	0.794	0.753	0.82	0.76	0.77	0.091	0.788	0.796	0.796	0.782	0.807	0.707	0.828	0.773	0.756	0.643	0.764	1.316	0.8	0.813	0.809	0.814	0.834	0.825	0.854	0.826	0.69	0.77	0.751	0.74	0.678	0.792	0.753	0.784	0.807
	1 day, 4:25:09	29.4	0.09	0.826	0.814	0.791	0.79	0.779	0.664	0.789	0.758	0.796	0.673	0.09	0.798	0.755	0.823	0.761	0.77	0.091	0.788	0.797	0.797	0.783	0.809	0.708	0.828	0.773	0.757	0.644	0.765	1.316	0.802	0.816	0.81	0.816	0.835	0.826	0.856	0.826	0.692	0.771	0.752	0.741	0.679	0.793	0.755	0.785	0.808
	1 day, 4:30:09	29.5	0.09	0.827	0.815	0.793	0.792	0.781	0.664	0.789	0.759	0.796	0.674	0.09	0.799	0.756	0.825	0.763	0.771	0.091	0.789	0.798	0.799	0.785	0.811	0.71	0.83	0.773	0.757	0.644	0.765	1.317	0.803	0.818	0.812	0.817	0.837	0.828	0.856	0.829	0.694	0.773	0.753	0.742	0.68	0.796	0.755	0.787	0.81
	1 day, 4:35:09	29.5	0.09	0.827	0.816	0.794	0.793	0.784	0.665	0.79	0.761	0.796	0.676	0.09	0.799	0.757	0.827	0.764	0.773	0.091	0.791	0.798	0.801	0.786	0.814	0.71	0.831	0.774	0.758	0.645	0.766	1.314	0.805	0.819	0.812	0.818	0.839	0.83	0.855	0.83	0.697	0.774	0.755	0.743	0.681	0.797	0.757	0.789	0.811
	1 day, 4:40:09	29.5	0.091	0.828	0.817	0.794	0.793	0.786	0.666	0.79	0.762	0.796	0.676	0.09	0.8	0.759	0.828	0.766	0.775	0.091	0.793	0.799	0.803	0.788	0.816	0.711	0.833	0.776	0.76	0.647	0.767	1.313	0.807	0.821	0.815	0.82	0.841	0.832	0.855	0.832	0.699	0.775	0.756	0.745	0.683	0.799	0.758	0.793	0.812
	1 day, 4:45:09	29.5	0.09	0.829	0.818	0.795	0.792	0.787	0.667	0.791	0.763	0.797	0.678	0.09	0.801	0.759	0.828	0.768	0.776	0.091	0.795	0.8	0.806	0.79	0.816	0.712	0.832	0.777	0.76	0.647	0.767	1.312	0.808	0.822	0.817	0.821	0.841	0.834	0.856	0.834	0.7	0.776	0.757	0.745	0.684	0.801	0.76	0.795	0.813
	1 day, 4:50:09	29.5	0.09	0.83	0.819	0.796	0.792	0.787	0.667	0.792	0.765	0.797	0.678	0.09	0.803	0.761	0.827	0.77	0.776	0.091	0.796	0.803	0.806	0.792	0.818	0.714	0.834	0.778	0.76	0.648	0.768	1.312	0.81	0.826	0.819	0.824	0.843	0.837	0.856	0.836	0.701	0.777	0.758	0.746	0.684	0.804	0.762	0.797	0.814
	1 day, 4:55:09	29.5	0.09	0.833	0.82	0.798	0.794	0.788	0.668	0.793	0.766	0.799	0.68	0.09	0.806	0.761	0.828	0.772	0.777	0.091	0.798	0.805	0.808	0.794	0.82	0.716	0.836	0.78	0.762	0.649	0.768	1.312	0.811	0.828	0.82	0.825	0.843	0.838	0.857	0.836	0.703	0.78	0.759	0.747	0.685	0.805	0.762	0.798	0.815
	1 day, 5:00:09	29.5	0.091	0.834	0.821	0.798	0.795	0.789	0.669	0.794	0.767	0.801	0.679	0.09	0.805	0.762	0.831	0.774	0.778	0.091	0.8	0.806	0.81	0.795	0.821	0.718	0.838	0.781	0.764	0.65	0.769	1.312	0.813	0.83	0.821	0.826	0.844	0.839	0.857	0.837	0.703	0.782	0.76	0.748	0.686	0.807	0.764	0.8	0.817
	1 day, 5:05:09	29.5	0.09	0.835	0.822	0.799	0.796	0.79	0.671	0.794	0.769	0.803	0.681	0.09	0.807	0.762	0.836	0.774	0.778	0.091	0.802	0.808	0.812	0.797	0.822	0.719	0.84	0.782	0.765	0.65	0.769	1.312	0.814	0.831	0.823	0.828	0.846	0.841	0.858	0.839	0.704	0.783	0.761	0.749	0.686	0.809	0.766	0.801	0.818
	1 day, 5:10:08	29.5	0.09	0.836	0.823	0.8	0.798	0.792	0.671	0.796	0.77	0.804	0.681	0.09	0.808	0.762	0.834	0.775	0.781	0.091	0.804	0.81	0.814	0.799	0.824	0.72	0.842	0.784	0.767	0.651	0.771	1.312	0.815	0.831	0.826	0.829	0.848	0.844	0.859	0.84	0.705	0.782	0.762	0.75	0.687	0.809	0.767	0.804	0.82
	1 day, 5:15:09	29.5	0.09	0.837	0.824	0.801	0.799	0.794	0.672	0.795	0.771	0.805	0.684	0.09	0.812	0.763	0.833	0.775	0.784	0.091	0.805	0.812	0.815	0.8	0.826	0.721	0.845	0.785	0.768	0.652	0.772	1.313	0.816	0.832	0.827	0.828	0.849	0.846	0.86	0.842	0.707	0.783	0.764	0.751	0.689	0.81	0.767	0.805	0.821
	1 day, 5:20:09	29.5	0.09	0.838	0.826	0.803	0.801	0.796	0.673	0.793	0.772	0.805	0.684	0.09	0.811	0.765	0.836	0.774	0.786	0.091	0.806	0.812	0.815	0.803	0.826	0.72	0.846	0.787	0.769	0.654	0.772	1.312	0.818	0.834	0.828	0.829	0.849	0.846	0.861	0.844	0.708	0.786	0.765	0.753	0.69	0.812	0.768	0.808	0.822
	1 day, 5:25:09	29.5	0.09	0.839	0.828	0.805	0.803	0.798	0.674	0.796	0.774	0.805	0.686	0.09	0.812	0.767	0.838	0.775	0.788	0.091	0.807	0.812	0.816	0.804	0.829	0.722	0.848	0.789	0.769	0.655	0.773	1.312	0.82	0.836	0.831	0.832	0.852	0.848	0.86	0.844	0.708	0.79	0.766	0.755	0.691	0.814	0.77	0.81	0.824
	1 day, 5:30:09	29.5	0.09	0.841	0.83	0.806	0.805	0.8	0.676	0.798	0.777	0.807	0.687	0.09	0.813	0.768	0.84	0.777	0.79	0.091	0.808	0.814	0.82	0.807	0.83	0.724	0.85	0.79	0.77	0.657	0.774	1.31	0.822	0.838	0.831	0.832	0.854	0.851	0.86	0.845	0.707	0.794	0.768	0.756	0.693	0.815	0.771	0.812	0.825
	1 day, 5:35:09	29.5	0.09	0.841	0.833	0.807	0.807	0.8	0.677	0.799	0.778	0.807	0.688	0.09	0.814	0.768	0.842	0.779	0.791	0.091	0.81	0.815	0.821	0.809	0.833	0.725	0.85	0.792	0.771	0.658	0.775	1.308	0.823	0.839	0.832	0.833	0.855	0.853	0.861	0.846	0.706	0.795	0.769	0.758	0.694	0.816	0.772	0.812	0.826
	1 day, 5:40:09	29.5	0.09	0.841	0.834	0.807	0.808	0.799	0.678	0.801	0.778	0.809	0.688	0.09	0.817	0.769	0.843	0.781	0.791	0.091	0.811	0.816	0.82	0.81	0.833	0.726	0.85	0.793	0.772	0.659	0.776	1.307	0.824	0.84	0.833	0.833	0.855	0.853	0.863	0.846	0.706	0.794	0.77	0.759	0.695	0.817	0.774	0.813	0.827
	1 day, 5:45:09	29.5	0.09	0.843	0.835	0.807	0.81	0.8	0.679	0.8	0.779	0.808	0.689	0.09	0.818	0.77	0.845	0.783	0.792	0.091	0.811	0.816	0.821	0.812	0.833	0.728	0.851	0.794	0.774	0.659	0.776	1.307	0.825	0.84	0.835	0.834	0.856	0.854	0.864	0.847	0.706	0.793	0.772	0.759	0.695	0.819	0.775	0.814	0.829
	1 day, 5:50:09	29.6	0.09	0.845	0.837	0.809	0.812	0.803	0.68	0.801	0.78	0.808	0.69	0.09	0.82	0.771	0.848	0.784	0.793	0.091	0.813	0.819	0.823	0.813	0.833	0.73	0.853	0.795	0.775	0.66	0.777	1.307	0.827	0.841	0.837	0.836	0.859	0.856	0.864	0.847	0.708	0.793	0.773	0.761	0.696	0.821	0.777	0.816	0.831
	1 day, 5:55:09	29.6	0.091	0.846	0.839	0.811	0.815	0.806	0.682	0.801	0.782	0.809	0.692	0.09	0.822	0.773	0.848	0.785	0.794	0.091	0.816	0.822	0.824	0.815	0.836	0.731	0.853	0.797	0.777	0.661	0.778	1.306	0.829	0.844	0.839	0.838	0.861	0.856	0.864	0.848	0.711	0.793	0.776	0.763	0.698	0.821	0.779	0.817	0.832
	1 day, 6:00:09	29.6	0.09	0.848	0.841	0.811	0.817	0.808	0.682	0.802	0.784	0.809	0.693	0.09	0.823	0.774	0.85	0.786	0.795	0.091	0.817	0.823	0.824	0.815	0.837	0.732	0.853	0.798	0.779	0.662	0.78	1.307	0.83	0.845	0.84	0.838	0.863	0.857	0.864	0.85	0.714	0.795	0.778	0.764	0.699	0.822	0.78	0.816	0.834
	1 day, 6:05:09	29.6	0.09	0.849	0.843	0.812	0.818	0.81	0.683	0.803	0.785	0.811	0.694	0.09	0.824	0.776	0.85	0.787	0.795	0.091	0.817	0.824	0.826	0.817	0.84	0.734	0.855	0.799	0.78	0.663	0.781	1.307	0.831	0.846	0.841	0.839	0.863	0.857	0.866	0.851	0.715	0.798	0.779	0.767	0.7	0.822	0.781	0.817	0.835
	1 day, 6:10:09	29.6	0.09	0.85	0.845	0.813	0.818	0.811	0.684	0.802	0.785	0.812	0.696	0.09	0.826	0.776	0.848	0.789	0.797	0.091	0.818	0.825	0.826	0.819	0.84	0.735	0.857	0.8	0.781	0.664	0.781	1.308	0.831	0.847	0.842	0.841	0.862	0.857	0.866	0.853	0.717	0.801	0.78	0.768	0.701	0.825	0.783	0.819	0.837
	1 day, 6:15:09	29.6	0.09	0.852	0.846	0.813	0.819	0.813	0.686	0.805	0.787	0.812	0.698	0.09	0.826	0.777	0.846	0.79	0.799	0.091	0.819	0.827	0.828	0.821	0.842	0.736	0.858	0.801	0.782	0.665	0.782	1.308	0.833	0.848	0.844	0.842	0.865	0.858	0.866	0.855	0.718	0.804	0.781	0.769	0.702	0.825	0.786	0.82	0.839
	1 day, 6:20:09	29.6	0.09	0.853	0.847	0.812	0.819	0.814	0.686	0.806	0.788	0.813	0.697	0.09	0.825	0.779	0.847	0.792	0.8	0.091	0.821	0.827	0.83	0.821	0.843	0.737	0.859	0.802	0.783	0.667	0.782	1.306	0.834	0.849	0.846	0.844	0.867	0.86	0.866	0.856	0.719	0.806	0.782	0.771	0.703	0.825	0.786	0.821	0.841
	1 day, 6:25:09	29.6	0.09	0.854	0.848	0.814	0.82	0.814	0.687	0.806	0.789	0.813	0.698	0.09	0.826	0.78	0.848	0.792	0.801	0.091	0.822	0.828	0.831	0.821	0.845	0.738	0.86	0.803	0.785	0.667	0.783	1.306	0.836	0.851	0.847	0.845	0.868	0.861	0.868	0.857	0.72	0.808	0.783	0.773	0.704	0.827	0.787	0.822	0.843
	1 day, 6:30:09	29.6	0.09	0.854	0.85	0.815	0.82	0.816	0.687	0.806	0.789	0.813	0.7	0.09	0.827	0.781	0.849	0.794	0.803	0.091	0.823	0.829	0.83	0.822	0.844	0.74	0.861	0.804	0.786	0.669	0.784	1.303	0.835	0.852	0.849	0.846	0.869	0.862	0.87	0.858	0.721	0.809	0.783	0.776	0.706	0.829	0.789	0.823	0.843
	1 day, 6:35:09	29.6	0.09	0.855	0.852	0.816	0.822	0.817	0.689	0.809	0.792	0.814	0.7	0.09	0.828	0.782	0.85	0.795	0.805	0.091	0.826	0.831	0.832	0.824	0.847	0.742	0.862	0.804	0.788	0.67	0.784	1.302	0.837	0.854	0.85	0.847	0.871	0.862	0.871	0.858	0.722	0.812	0.784	0.778	0.706	0.829	0.79	0.823	0.843
	1 day, 6:40:09	29.6	0.09	0.857	0.854	0.816	0.823	0.819	0.69	0.81	0.793	0.813	0.701	0.09	0.83	0.784	0.851	0.795	0.807	0.091	0.828	0.832	0.835	0.825	0.849	0.743	0.863	0.805	0.79	0.672	0.785	1.302	0.837	0.856	0.851	0.849	0.872	0.862	0.873	0.858	0.724	0.814	0.785	0.78	0.707	0.832	0.791	0.824	0.846
	1 day, 6:45:09	29.6	0.09	0.856	0.854	0.817	0.823	0.818	0.691	0.809	0.794	0.812	0.702	0.09	0.832	0.784	0.851	0.795	0.808	0.091	0.829	0.832	0.834	0.827	0.849	0.744	0.863	0.806	0.791	0.672	0.786	1.302	0.839	0.855	0.852	0.849	0.874	0.863	0.875	0.858	0.724	0.815	0.786	0.78	0.708	0.832	0.792	0.825	0.846
	1 day, 6:50:09	29.5	0.09	0.857	0.855	0.819	0.825	0.82	0.692	0.811	0.795	0.814	0.704	0.09	0.834	0.786	0.853	0.796	0.809	0.091	0.83	0.833	0.834	0.827	0.851	0.746	0.864	0.806	0.792	0.673	0.786	1.302	0.841	0.857	0.854	0.851	0.875	0.864	0.875	0.859	0.725	0.816	0.787	0.781	0.709	0.833	0.794	0.826	0.847
	1 day, 6:55:09	29.5	0.09	0.858	0.856	0.82	0.826	0.82	0.693	0.814	0.796	0.815	0.704	0.09	0.836	0.787	0.855	0.798	0.81	0.091	0.83	0.834	0.836	0.829	0.854	0.748	0.865	0.807	0.794	0.674	0.787	1.302	0.842	0.858	0.856	0.853	0.876	0.865	0.877	0.862	0.726	0.817	0.788	0.782	0.71	0.835	0.795	0.827	0.849
	1 day, 7:00:09	29.5	0.09	0.859	0.859	0.823	0.829	0.823	0.695	0.814	0.798	0.815	0.706	0.09	0.837	0.788	0.856	0.799	0.812	0.091	0.832	0.835	0.837	0.829	0.855	0.748	0.867	0.807	0.795	0.675	0.788	1.303	0.844	0.859	0.855	0.853	0.877	0.866	0.878	0.863	0.726	0.818	0.789	0.784	0.711	0.836	0.797	0.828	0.85
	1 day, 7:05:09	29.5	0.09	0.859	0.858	0.823	0.828	0.822	0.694	0.813	0.798	0.814	0.705	0.09	0.838	0.789	0.856	0.799	0.813	0.091	0.832	0.836	0.838	0.83	0.854	0.75	0.868	0.807	0.795	0.675	0.788	1.303	0.842	0.86	0.858	0.855	0.876	0.866	0.877	0.864	0.726	0.818	0.79	0.785	0.712	0.837	0.798	0.828	0.851
	1 day, 7:10:09	29.5	0.09	0.861	0.859	0.824	0.831	0.823	0.696	0.814	0.799	0.814	0.706	0.09	0.839	0.79	0.856	0.801	0.815	0.091	0.833	0.838	0.84	0.832	0.856	0.752	0.868	0.806	0.797	0.676	0.789	1.304	0.846	0.862	0.859	0.856	0.878	0.866	0.877	0.865	0.725	0.817	0.79	0.786	0.712	0.838	0.8	0.83	0.852
	1 day, 7:15:09	29.5	0.09	0.862	0.86	0.825	0.832	0.824	0.698	0.814	0.8	0.815	0.707	0.09	0.841	0.791	0.856	0.803	0.816	0.091	0.835	0.839	0.84	0.835	0.86	0.752	0.87	0.806	0.799	0.677	0.789	1.303	0.845	0.862	0.86	0.856	0.879	0.867	0.879	0.866	0.725	0.819	0.791	0.786	0.713	0.84	0.8	0.831	0.853
	1 day, 7:20:09	29.5	0.09	0.863	0.861	0.825	0.833	0.826	0.699	0.816	0.802	0.816	0.709	0.09	0.842	0.793	0.856	0.804	0.817	0.091	0.836	0.841	0.841	0.835	0.861	0.753	0.872	0.807	0.8	0.678	0.79	1.302	0.848	0.864	0.862	0.858	0.88	0.87	0.879	0.868	0.726	0.822	0.793	0.787	0.715	0.842	0.802	0.832	0.854
	1 day, 7:25:09	29.5	0.09	0.865	0.862	0.827	0.834	0.827	0.699	0.816	0.804	0.816	0.711	0.09	0.843	0.794	0.858	0.805	0.817	0.091	0.836	0.842	0.842	0.836	0.862	0.754	0.873	0.808	0.802	0.68	0.79	1.3	0.849	0.864	0.861	0.858	0.882	0.87	0.881	0.869	0.727	0.824	0.794	0.789	0.716	0.843	0.804	0.831	0.855
	1 day, 7:30:09	29.5	0.09	0.866	0.862	0.827	0.835	0.827	0.7	0.816	0.804	0.817	0.711	0.09	0.845	0.795	0.859	0.805	0.817	0.091	0.838	0.843	0.843	0.837	0.863	0.753	0.875	0.809	0.803	0.681	0.792	1.3	0.85	0.866	0.861	0.858	0.881	0.869	0.882	0.869	0.729	0.825	0.795	0.79	0.718	0.844	0.804	0.834	0.856
	1 day, 7:35:09	29.5	0.09	0.867	0.862	0.828	0.835	0.828	0.701	0.815	0.805	0.817	0.713	0.09	0.847	0.796	0.86	0.806	0.816	0.091	0.837	0.844	0.843	0.839	0.864	0.756	0.876	0.809	0.805	0.682	0.792	1.301	0.85	0.867	0.862	0.86	0.884	0.871	0.882	0.87	0.731	0.826	0.796	0.791	0.718	0.846	0.806	0.834	0.857
	1 day, 7:40:09	29.5	0.09	0.867	0.863	0.829	0.835	0.829	0.702	0.815	0.805	0.818	0.712	0.09	0.847	0.797	0.86	0.808	0.817	0.091	0.836	0.844	0.843	0.839	0.864	0.756	0.876	0.809	0.805	0.682	0.792	1.3	0.85	0.869	0.864	0.861	0.883	0.871	0.884	0.871	0.732	0.827	0.797	0.792	0.718	0.847	0.808	0.835	0.858
	1 day, 7:45:09	29.5	0.09	0.866	0.864	0.828	0.837	0.83	0.702	0.816	0.808	0.818	0.713	0.09	0.849	0.798	0.862	0.809	0.818	0.091	0.838	0.844	0.845	0.84	0.866	0.756	0.877	0.809	0.806	0.682	0.792	1.299	0.853	0.87	0.866	0.861	0.884	0.871	0.883	0.871	0.734	0.825	0.799	0.793	0.718	0.849	0.808	0.836	0.86
	1 day, 7:50:09	29.5	0.09	0.867	0.865	0.828	0.837	0.831	0.704	0.818	0.811	0.82	0.715	0.09	0.85	0.8	0.863	0.811	0.819	0.091	0.839	0.845	0.846	0.842	0.866	0.759	0.878	0.81	0.807	0.684	0.794	1.3	0.855	0.87	0.867	0.862	0.885	0.873	0.885	0.873	0.736	0.825	0.799	0.795	0.72	0.851	0.812	0.838	0.86
	1 day, 7:55:09	29.5	0.09	0.867	0.864	0.83	0.837	0.832	0.704	0.819	0.812	0.821	0.716	0.09	0.851	0.801	0.865	0.812	0.821	0.091	0.841	0.848	0.849	0.843	0.868	0.759	0.879	0.81	0.809	0.685	0.794	1.301	0.856	0.872	0.868	0.862	0.886	0.873	0.885	0.874	0.737	0.826	0.799	0.797	0.721	0.852	0.814	0.838	0.861
	1 day, 8:00:09	29.5	0.09	0.869	0.866	0.833	0.838	0.834	0.706	0.817	0.814	0.821	0.717	0.09	0.852	0.803	0.866	0.812	0.823	0.091	0.842	0.848	0.851	0.843	0.868	0.762	0.88	0.811	0.81	0.687	0.795	1.302	0.856	0.872	0.868	0.863	0.887	0.874	0.887	0.873	0.737	0.829	0.801	0.8	0.723	0.853	0.815	0.84	0.861
	1 day, 8:05:09	29.5	0.09	0.869	0.867	0.834	0.838	0.835	0.706	0.818	0.815	0.821	0.718	0.09	0.852	0.804	0.866	0.813	0.824	0.091	0.843	0.848	0.851	0.843	0.868	0.762	0.881	0.812	0.81	0.688	0.796	1.303	0.858	0.874	0.869	0.865	0.888	0.874	0.888	0.874	0.737	0.831	0.803	0.802	0.724	0.855	0.817	0.84	0.862
	1 day, 8:10:09	29.5	0.09	0.87	0.867	0.834	0.838	0.835	0.707	0.818	0.817	0.82	0.719	0.09	0.854	0.804	0.866	0.813	0.825	0.091	0.842	0.848	0.851	0.843	0.87	0.764	0.882	0.813	0.81	0.69	0.796	1.303	0.858	0.874	0.869	0.863	0.888	0.875	0.887	0.875	0.739	0.834	0.804	0.802	0.724	0.856	0.818	0.842	0.863
	1 day, 8:15:09	29.5	0.09	0.871	0.868	0.834	0.84	0.837	0.707	0.82	0.82	0.821	0.721	0.09	0.854	0.805	0.865	0.815	0.826	0.091	0.841	0.85	0.852	0.843	0.873	0.766	0.883	0.815	0.811	0.69	0.797	1.301	0.859	0.874	0.871	0.866	0.89	0.876	0.889	0.876	0.739	0.836	0.805	0.802	0.725	0.857	0.82	0.842	0.864
	1 day, 8:20:09	29.5	0.09	0.872	0.868	0.834	0.84	0.838	0.708	0.82	0.824	0.822	0.722	0.09	0.854	0.807	0.865	0.817	0.827	0.091	0.841	0.85	0.854	0.845	0.873	0.766	0.884	0.818	0.812	0.691	0.798	1.301	0.86	0.874	0.871	0.868	0.891	0.877	0.891	0.877	0.74	0.836	0.806	0.803	0.726	0.859	0.821	0.843	0.865
	1 day, 8:25:09	29.5	0.09	0.871	0.869	0.835	0.84	0.839	0.708	0.819	0.825	0.824	0.722	0.09	0.855	0.808	0.867	0.818	0.828	0.091	0.841	0.849	0.854	0.845	0.874	0.768	0.885	0.818	0.813	0.692	0.798	1.3	0.861	0.874	0.872	0.865	0.891	0.878	0.892	0.878	0.74	0.835	0.808	0.804	0.727	0.86	0.823	0.844	0.865
	1 day, 8:30:09	29.5	0.09	0.872	0.869	0.835	0.842	0.839	0.709	0.821	0.828	0.824	0.724	0.09	0.857	0.809	0.868	0.821	0.83	0.091	0.844	0.85	0.854	0.847	0.874	0.769	0.886	0.819	0.813	0.692	0.799	1.299	0.863	0.874	0.873	0.868	0.892	0.877	0.892	0.878	0.74	0.835	0.809	0.805	0.728	0.861	0.824	0.846	0.865
	1 day, 8:35:09	29.5	0.09	0.872	0.87	0.836	0.843	0.842	0.711	0.821	0.829	0.823	0.725	0.09	0.857	0.809	0.869	0.822	0.831	0.091	0.845	0.853	0.855	0.847	0.873	0.77	0.887	0.821	0.815	0.694	0.799	1.298	0.863	0.875	0.874	0.872	0.893	0.878	0.893	0.88	0.741	0.834	0.81	0.806	0.729	0.863	0.825	0.848	0.867
	1 day, 8:40:09	29.5	0.09	0.873	0.87	0.836	0.843	0.842	0.71	0.82	0.83	0.822	0.725	0.09	0.858	0.81	0.869	0.822	0.831	0.091	0.847	0.852	0.856	0.848	0.873	0.771	0.888	0.824	0.816	0.694	0.8	1.297	0.863	0.876	0.874	0.87	0.893	0.877	0.893	0.88	0.742	0.834	0.81	0.808	0.73	0.864	0.827	0.847	0.867
	1 day, 8:45:09	29.5	0.09	0.875	0.872	0.836	0.845	0.844	0.711	0.821	0.832	0.824	0.726	0.09	0.861	0.811	0.87	0.822	0.83	0.091	0.847	0.852	0.856	0.848	0.875	0.771	0.888	0.828	0.818	0.695	0.8	1.297	0.864	0.877	0.874	0.87	0.894	0.878	0.894	0.881	0.743	0.836	0.813	0.81	0.731	0.865	0.829	0.847	0.868
	1 day, 8:50:09	29.5	0.09	0.875	0.871	0.837	0.847	0.844	0.713	0.821	0.833	0.826	0.727	0.09	0.862	0.811	0.872	0.821	0.83	0.091	0.847	0.852	0.857	0.848	0.875	0.773	0.89	0.831	0.819	0.696	0.8	1.299	0.863	0.877	0.875	0.871	0.895	0.88	0.896	0.882	0.744	0.838	0.816	0.811	0.732	0.865	0.83	0.85	0.868
	1 day, 8:55:09	29.5	0.09	0.876	0.871	0.837	0.848	0.844	0.713	0.82	0.834	0.826	0.729	0.09	0.863	0.813	0.873	0.822	0.83	0.091	0.846	0.854	0.858	0.848	0.877	0.775	0.891	0.833	0.821	0.696	0.801	1.299	0.865	0.878	0.876	0.873	0.896	0.88	0.896	0.883	0.744	0.841	0.819	0.813	0.733	0.867	0.832	0.852	0.869
	1 day, 9:00:09	29.5	0.09	0.878	0.873	0.838	0.85	0.845	0.714	0.823	0.836	0.827	0.73	0.09	0.866	0.814	0.874	0.826	0.831	0.091	0.847	0.855	0.859	0.85	0.879	0.777	0.892	0.834	0.822	0.698	0.801	1.299	0.865	0.878	0.876	0.873	0.897	0.881	0.897	0.884	0.746	0.842	0.823	0.815	0.735	0.868	0.833	0.853	0.869
	1 day, 9:05:09	29.5	0.09	0.879	0.871	0.837	0.849	0.846	0.714	0.823	0.838	0.826	0.73	0.09	0.868	0.816	0.875	0.828	0.831	0.091	0.849	0.855	0.858	0.85	0.878	0.777	0.892	0.835	0.822	0.698	0.801	1.299	0.865	0.879	0.877	0.875	0.897	0.882	0.898	0.884	0.747	0.843	0.825	0.816	0.734	0.87	0.834	0.852	0.869
	1 day, 9:10:09	29.5	0.09	0.88	0.874	0.838	0.85	0.847	0.715	0.822	0.84	0.826	0.731	0.09	0.869	0.818	0.875	0.828	0.831	0.091	0.85	0.855	0.86	0.85	0.88	0.78	0.894	0.836	0.823	0.699	0.802	1.299	0.868	0.881	0.878	0.873	0.898	0.882	0.899	0.885	0.748	0.843	0.827	0.816	0.735	0.871	0.835	0.853	0.87
	1 day, 9:15:09	29.5	0.09	0.88	0.874	0.839	0.85	0.847	0.716	0.824	0.842	0.826	0.732	0.09	0.87	0.818	0.875	0.827	0.832	0.091	0.849	0.856	0.861	0.852	0.88	0.78	0.895	0.836	0.824	0.7	0.803	1.298	0.869	0.883	0.878	0.875	0.898	0.882	0.9	0.886	0.749	0.845	0.827	0.817	0.737	0.872	0.838	0.855	0.871
	1 day, 9:20:09	29.5	0.09	0.882	0.874	0.84	0.851	0.847	0.716	0.824	0.844	0.826	0.734	0.09	0.87	0.819	0.877	0.825	0.835	0.091	0.85	0.857	0.862	0.853	0.882	0.781	0.897	0.838	0.826	0.702	0.803	1.297	0.868	0.882	0.88	0.876	0.899	0.883	0.901	0.887	0.751	0.846	0.828	0.818	0.738	0.873	0.84	0.856	0.87
	1 day, 9:25:09	29.5	0.09	0.882	0.875	0.84	0.852	0.847	0.717	0.824	0.845	0.828	0.734	0.09	0.871	0.821	0.878	0.826	0.836	0.091	0.85	0.857	0.862	0.854	0.881	0.782	0.899	0.838	0.827	0.703	0.803	1.296	0.87	0.884	0.881	0.875	0.9	0.884	0.901	0.888	0.753	0.846	0.829	0.82	0.739	0.873	0.841	0.856	0.871
	1 day, 9:30:09	29.5	0.09	0.882	0.875	0.841	0.852	0.848	0.718	0.823	0.845	0.829	0.734	0.09	0.873	0.822	0.88	0.827	0.837	0.091	0.852	0.857	0.863	0.855	0.882	0.783	0.9	0.841	0.828	0.704	0.804	1.295	0.871	0.885	0.881	0.877	0.9	0.883	0.901	0.888	0.755	0.847	0.83	0.822	0.74	0.874	0.843	0.855	0.87
	1 day, 9:35:09	29.5	0.09	0.884	0.876	0.842	0.854	0.851	0.72	0.825	0.848	0.83	0.736	0.09	0.875	0.824	0.88	0.829	0.838	0.091	0.853	0.859	0.864	0.856	0.887	0.784	0.901	0.844	0.829	0.705	0.804	1.295	0.871	0.886	0.882	0.878	0.902	0.886	0.902	0.889	0.756	0.847	0.831	0.824	0.741	0.875	0.844	0.857	0.872
	1 day, 9:40:09	29.5	0.09	0.884	0.877	0.841	0.853	0.849	0.72	0.825	0.847	0.83	0.737	0.09	0.875	0.826	0.88	0.83	0.838	0.091	0.854	0.859	0.865	0.857	0.885	0.785	0.902	0.847	0.831	0.707	0.804	1.296	0.872	0.885	0.881	0.876	0.903	0.885	0.903	0.891	0.756	0.848	0.833	0.825	0.743	0.877	0.846	0.858	0.872
	1 day, 9:45:09	29.5	0.09	0.884	0.877	0.841	0.853	0.85	0.72	0.823	0.848	0.83	0.738	0.09	0.874	0.828	0.88	0.829	0.839	0.09	0.854	0.859	0.865	0.856	0.885	0.785	0.903	0.85	0.832	0.707	0.805	1.296	0.872	0.886	0.882	0.877	0.904	0.887	0.905	0.892	0.757	0.849	0.834	0.825	0.743	0.877	0.846	0.857	0.871
	1 day, 9:50:09	29.5	0.09	0.885	0.878	0.841	0.854	0.852	0.721	0.824	0.849	0.829	0.739	0.09	0.876	0.83	0.88	0.829	0.84	0.091	0.854	0.86	0.866	0.857	0.885	0.786	0.904	0.856	0.834	0.707	0.806	1.296	0.873	0.888	0.884	0.881	0.903	0.888	0.905	0.893	0.759	0.851	0.835	0.826	0.744	0.879	0.849	0.858	0.872
	1 day, 9:55:09	29.5	0.09	0.886	0.879	0.843	0.855	0.853	0.723	0.825	0.85	0.831	0.741	0.09	0.878	0.833	0.881	0.829	0.841	0.091	0.854	0.861	0.866	0.857	0.886	0.788	0.905	0.861	0.835	0.709	0.806	1.296	0.874	0.889	0.882	0.879	0.904	0.888	0.904	0.894	0.758	0.853	0.835	0.827	0.745	0.879	0.851	0.858	0.873
	1 day, 10:00:09	29.5	0.09	0.885	0.878	0.844	0.855	0.853	0.725	0.826	0.853	0.83	0.743	0.09	0.879	0.834	0.881	0.831	0.839	0.09	0.855	0.862	0.867	0.858	0.887	0.79	0.906	0.865	0.836	0.71	0.806	1.297	0.875	0.888	0.883	0.875	0.905	0.887	0.904	0.896	0.759	0.854	0.833	0.829	0.746	0.88	0.853	0.858	0.873
	1 day, 10:05:09	29.5	0.09	0.886	0.878	0.844	0.857	0.854	0.724	0.825	0.854	0.831	0.743	0.09	0.879	0.835	0.884	0.833	0.839	0.091	0.856	0.863	0.868	0.859	0.888	0.791	0.908	0.867	0.837	0.711	0.808	1.296	0.876	0.889	0.885	0.881	0.906	0.887	0.906	0.897	0.759	0.856	0.832	0.831	0.747	0.882	0.854	0.86	0.873
	1 day, 10:10:09	29.5	0.09	0.887	0.879	0.845	0.857	0.853	0.725	0.825	0.855	0.832	0.744	0.09	0.879	0.836	0.884	0.834	0.838	0.091	0.857	0.862	0.868	0.859	0.888	0.792	0.909	0.869	0.838	0.712	0.808	1.295	0.876	0.89	0.886	0.884	0.906	0.889	0.907	0.897	0.758	0.857	0.832	0.832	0.748	0.882	0.856	0.86	0.874
	1 day, 10:15:09	29.5	0.09	0.888	0.881	0.847	0.858	0.854	0.726	0.827	0.857	0.832	0.746	0.09	0.881	0.836	0.885	0.836	0.839	0.091	0.856	0.864	0.869	0.862	0.89	0.794	0.91	0.87	0.84	0.713	0.808	1.295	0.877	0.891	0.885	0.882	0.907	0.889	0.907	0.897	0.758	0.859	0.832	0.834	0.749	0.883	0.858	0.861	0.874
	1 day, 10:20:09	29.5	0.09	0.888	0.881	0.846	0.858	0.854	0.727	0.826	0.857	0.833	0.746	0.09	0.882	0.837	0.885	0.837	0.839	0.091	0.855	0.864	0.869	0.863	0.89	0.795	0.911	0.87	0.841	0.714	0.809	1.294	0.876	0.89	0.887	0.88	0.908	0.89	0.909	0.898	0.759	0.86	0.833	0.835	0.75	0.884	0.86	0.86	0.874
	1 day, 10:25:09	29.5	0.09	0.888	0.882	0.846	0.859	0.855	0.727	0.826	0.858	0.832	0.748	0.09	0.883	0.84	0.887	0.836	0.841	0.091	0.856	0.863	0.87	0.862	0.89	0.795	0.913	0.87	0.842	0.715	0.81	1.294	0.877	0.89	0.887	0.883	0.908	0.89	0.909	0.9	0.76	0.86	0.833	0.836	0.752	0.886	0.861	0.861	0.875
	1 day, 10:30:09	29.5	0.09	0.888	0.882	0.845	0.86	0.855	0.729	0.826	0.858	0.832	0.748	0.09	0.883	0.841	0.888	0.836	0.839	0.091	0.858	0.864	0.869	0.863	0.89	0.797	0.914	0.87	0.843	0.717	0.81	1.294	0.877	0.891	0.886	0.885	0.908	0.888	0.908	0.9	0.76	0.862	0.833	0.837	0.753	0.887	0.862	0.861	0.876
	1 day, 10:35:09	29.5	0.09	0.888	0.882	0.845	0.86	0.854	0.73	0.828	0.86	0.834	0.75	0.09	0.883	0.843	0.889	0.836	0.841	0.09	0.857	0.864	0.87	0.864	0.892	0.798	0.916	0.87	0.844	0.719	0.811	1.295	0.881	0.892	0.888	0.882	0.91	0.889	0.908	0.901	0.762	0.865	0.834	0.838	0.754	0.888	0.864	0.863	0.878
	1 day, 10:40:09	29.5	0.09	0.887	0.882	0.846	0.86	0.856	0.731	0.829	0.861	0.835	0.751	0.09	0.883	0.844	0.889	0.837	0.844	0.091	0.858	0.866	0.871	0.863	0.893	0.799	0.917	0.871	0.845	0.72	0.812	1.296	0.881	0.893	0.891	0.884	0.91	0.891	0.909	0.902	0.762	0.867	0.835	0.838	0.755	0.89	0.865	0.862	0.878
	1 day, 10:45:09	29.5	0.09	0.887	0.883	0.848	0.861	0.856	0.732	0.83	0.863	0.836	0.753	0.09	0.884	0.846	0.89	0.838	0.847	0.091	0.86	0.867	0.874	0.864	0.893	0.8	0.918	0.872	0.847	0.72	0.813	1.296	0.881	0.894	0.89	0.884	0.911	0.892	0.91	0.903	0.763	0.868	0.835	0.841	0.757	0.891	0.867	0.864	0.879
	1 day, 10:50:09	29.5	0.09	0.887	0.883	0.849	0.861	0.855	0.733	0.829	0.863	0.836	0.753	0.09	0.884	0.848	0.89	0.839	0.848	0.091	0.859	0.867	0.872	0.866	0.893	0.802	0.92	0.872	0.848	0.721	0.814	1.297	0.879	0.896	0.89	0.886	0.911	0.893	0.91	0.904	0.765	0.869	0.834	0.843	0.758	0.891	0.868	0.865	0.88
	1 day, 10:55:09	29.5	0.09	0.887	0.884	0.85	0.862	0.857	0.734	0.829	0.863	0.837	0.754	0.09	0.885	0.85	0.89	0.839	0.851	0.09	0.86	0.868	0.872	0.868	0.894	0.803	0.922	0.87	0.85	0.722	0.815	1.295	0.883	0.895	0.892	0.886	0.91	0.892	0.913	0.905	0.767	0.871	0.833	0.843	0.759	0.891	0.869	0.867	0.88
	1 day, 11:00:09	29.5	0.09	0.887	0.885	0.851	0.861	0.859	0.735	0.831	0.864	0.837	0.756	0.09	0.887	0.851	0.893	0.839	0.85	0.09	0.86	0.868	0.873	0.868	0.894	0.804	0.922	0.872	0.851	0.723	0.815	1.294	0.882	0.896	0.893	0.885	0.91	0.893	0.915	0.905	0.77	0.872	0.834	0.844	0.76	0.893	0.87	0.867	0.878
	1 day, 11:05:09	29.6	0.09	0.887	0.884	0.852	0.861	0.86	0.733	0.828	0.866	0.836	0.756	0.09	0.887	0.851	0.894	0.839	0.85	0.09	0.861	0.868	0.874	0.868	0.895	0.805	0.924	0.873	0.852	0.724	0.814	1.293	0.881	0.898	0.892	0.884	0.911	0.895	0.914	0.906	0.771	0.872	0.835	0.845	0.761	0.895	0.872	0.867	0.88
	1 day, 11:10:09	29.6	0.09	0.888	0.885	0.853	0.862	0.861	0.735	0.829	0.866	0.836	0.758	0.09	0.887	0.852	0.895	0.84	0.852	0.091	0.863	0.868	0.874	0.867	0.895	0.808	0.925	0.874	0.853	0.726	0.815	1.293	0.882	0.898	0.892	0.889	0.913	0.894	0.913	0.908	0.773	0.872	0.834	0.847	0.763	0.895	0.874	0.868	0.88
	1 day, 11:15:09	29.6	0.09	0.891	0.885	0.854	0.863	0.861	0.736	0.833	0.865	0.836	0.759	0.09	0.888	0.853	0.897	0.84	0.852	0.09	0.862	0.87	0.875	0.868	0.898	0.809	0.926	0.875	0.855	0.726	0.816	1.294	0.884	0.899	0.893	0.887	0.913	0.895	0.914	0.908	0.774	0.872	0.835	0.848	0.764	0.896	0.875	0.87	0.88
	1 day, 11:20:09	29.6	0.09	0.892	0.886	0.856	0.864	0.862	0.737	0.832	0.867	0.837	0.761	0.09	0.888	0.854	0.899	0.841	0.852	0.09	0.863	0.87	0.875	0.87	0.897	0.81	0.927	0.876	0.856	0.727	0.817	1.294	0.884	0.899	0.894	0.888	0.913	0.895	0.914	0.909	0.777	0.872	0.836	0.85	0.766	0.897	0.877	0.871	0.88
	1 day, 11:25:09	29.6	0.09	0.893	0.886	0.856	0.864	0.863	0.738	0.832	0.867	0.839	0.762	0.09	0.888	0.855	0.899	0.842	0.852	0.09	0.862	0.869	0.876	0.869	0.898	0.812	0.928	0.877	0.857	0.729	0.817	1.296	0.885	0.897	0.893	0.888	0.914	0.896	0.915	0.91	0.778	0.873	0.837	0.85	0.767	0.898	0.878	0.87	0.881
	1 day, 11:30:09	29.6	0.09	0.894	0.886	0.857	0.864	0.861	0.738	0.832	0.867	0.839	0.762	0.09	0.89	0.857	0.9	0.844	0.852	0.091	0.866	0.869	0.875	0.87	0.9	0.813	0.929	0.878	0.858	0.729	0.818	1.296	0.885	0.898	0.895	0.889	0.914	0.898	0.917	0.91	0.78	0.874	0.838	0.851	0.768	0.899	0.88	0.871	0.882
	1 day, 11:35:09	29.6	0.09	0.895	0.886	0.857	0.864	0.863	0.74	0.834	0.867	0.838	0.763	0.09	0.892	0.857	0.902	0.845	0.852	0.09	0.867	0.87	0.877	0.871	0.9	0.815	0.93	0.877	0.859	0.73	0.819	1.296	0.886	0.898	0.895	0.889	0.914	0.897	0.917	0.911	0.781	0.876	0.838	0.852	0.769	0.9	0.881	0.87	0.883
	1 day, 11:40:09	29.6	0.09	0.894	0.887	0.858	0.865	0.863	0.74	0.831	0.869	0.837	0.763	0.09	0.893	0.859	0.903	0.846	0.853	0.09	0.866	0.871	0.876	0.871	0.901	0.814	0.933	0.877	0.86	0.731	0.82	1.296	0.886	0.9	0.898	0.891	0.916	0.899	0.917	0.911	0.782	0.878	0.84	0.854	0.77	0.901	0.883	0.87	0.884
	1 day, 11:45:09	29.6	0.09	0.894	0.887	0.86	0.866	0.864	0.74	0.832	0.87	0.838	0.765	0.09	0.893	0.861	0.902	0.847	0.854	0.091	0.866	0.873	0.877	0.87	0.902	0.815	0.935	0.878	0.861	0.732	0.821	1.294	0.888	0.902	0.898	0.892	0.916	0.898	0.917	0.912	0.783	0.879	0.842	0.854	0.772	0.902	0.885	0.87	0.885
	1 day, 11:50:09	29.6	0.09	0.894	0.888	0.861	0.867	0.865	0.743	0.833	0.869	0.839	0.765	0.09	0.893	0.863	0.902	0.849	0.855	0.09	0.868	0.873	0.877	0.871	0.903	0.817	0.936	0.879	0.863	0.733	0.821	1.292	0.886	0.901	0.899	0.892	0.917	0.899	0.915	0.912	0.785	0.882	0.842	0.854	0.773	0.903	0.886	0.872	0.884
	1 day, 11:55:09	29.5	0.09	0.894	0.888	0.861	0.867	0.865	0.743	0.832	0.869	0.84	0.766	0.09	0.892	0.865	0.901	0.849	0.857	0.09	0.867	0.872	0.879	0.872	0.903	0.818	0.937	0.878	0.865	0.734	0.823	1.292	0.889	0.903	0.9	0.892	0.917	0.9	0.915	0.913	0.787	0.883	0.842	0.854	0.774	0.903	0.886	0.873	0.886
	1 day, 12:00:09	29.5	0.09	0.895	0.888	0.861	0.867	0.865	0.744	0.832	0.869	0.84	0.768	0.09	0.892	0.867	0.901	0.85	0.859	0.09	0.866	0.874	0.88	0.873	0.902	0.82	0.938	0.88	0.866	0.735	0.823	1.292	0.889	0.902	0.897	0.893	0.917	0.902	0.915	0.914	0.787	0.885	0.843	0.856	0.775	0.904	0.887	0.873	0.887
	1 day, 12:05:09	29.5	0.09	0.894	0.889	0.862	0.867	0.866	0.744	0.832	0.87	0.839	0.77	0.09	0.895	0.868	0.902	0.851	0.861	0.09	0.87	0.874	0.879	0.874	0.902	0.821	0.938	0.879	0.867	0.737	0.823	1.293	0.889	0.903	0.899	0.894	0.918	0.904	0.915	0.914	0.788	0.885	0.842	0.857	0.776	0.906	0.888	0.873	0.886
	1 day, 12:10:09	29.5	0.09	0.895	0.89	0.864	0.868	0.868	0.746	0.833	0.871	0.839	0.771	0.09	0.896	0.868	0.903	0.85	0.862	0.09	0.872	0.875	0.879	0.875	0.904	0.822	0.938	0.881	0.868	0.738	0.825	1.294	0.889	0.904	0.9	0.895	0.919	0.901	0.918	0.916	0.789	0.886	0.842	0.858	0.777	0.907	0.889	0.873	0.884
	1 day, 12:15:09	29.5	0.09	0.896	0.89	0.863	0.868	0.866	0.747	0.833	0.872	0.839	0.772	0.09	0.897	0.868	0.906	0.85	0.864	0.09	0.87	0.874	0.879	0.874	0.905	0.823	0.938	0.882	0.87	0.739	0.826	1.295	0.891	0.905	0.901	0.896	0.919	0.902	0.917	0.916	0.789	0.885	0.844	0.859	0.778	0.907	0.89	0.872	0.888
	1 day, 12:20:09	29.5	0.09	0.897	0.89	0.863	0.868	0.866	0.746	0.833	0.872	0.839	0.772	0.09	0.895	0.869	0.908	0.848	0.864	0.09	0.871	0.874	0.88	0.874	0.904	0.825	0.939	0.882	0.87	0.74	0.826	1.295	0.892	0.905	0.901	0.897	0.919	0.904	0.916	0.917	0.79	0.885	0.845	0.86	0.78	0.909	0.891	0.872	0.888
	1 day, 12:25:09	29.5	0.09	0.897	0.892	0.864	0.87	0.867	0.747	0.833	0.873	0.84	0.774	0.09	0.896	0.869	0.909	0.849	0.865	0.09	0.871	0.876	0.88	0.875	0.907	0.826	0.94	0.881	0.871	0.74	0.826	1.295	0.892	0.905	0.901	0.897	0.92	0.905	0.916	0.918	0.791	0.885	0.845	0.861	0.781	0.91	0.893	0.874	0.887
	1 day, 12:30:09	29.5	0.09	0.899	0.892	0.864	0.871	0.869	0.749	0.834	0.873	0.841	0.776	0.09	0.898	0.87	0.909	0.851	0.866	0.09	0.874	0.876	0.882	0.877	0.908	0.828	0.939	0.883	0.871	0.741	0.827	1.293	0.893	0.907	0.902	0.899	0.92	0.904	0.918	0.919	0.792	0.887	0.845	0.862	0.782	0.91	0.893	0.874	0.885
	1 day, 12:35:09	29.5	0.09	0.898	0.894	0.863	0.873	0.869	0.749	0.833	0.874	0.842	0.776	0.09	0.896	0.871	0.908	0.851	0.865	0.09	0.874	0.877	0.883	0.877	0.908	0.829	0.938	0.883	0.873	0.743	0.828	1.291	0.894	0.908	0.901	0.899	0.921	0.904	0.918	0.92	0.793	0.889	0.846	0.862	0.783	0.911	0.893	0.873	0.885
	1 day, 12:40:09	29.5	0.09	0.899	0.894	0.863	0.872	0.871	0.75	0.834	0.874	0.842	0.777	0.09	0.897	0.874	0.909	0.851	0.866	0.09	0.875	0.877	0.883	0.877	0.908	0.829	0.938	0.884	0.873	0.744	0.829	1.29	0.893	0.908	0.9	0.9	0.922	0.906	0.921	0.92	0.794	0.89	0.848	0.863	0.784	0.912	0.893	0.873	0.892
	1 day, 12:45:09	29.5	0.09	0.9	0.895	0.864	0.872	0.871	0.752	0.835	0.875	0.842	0.779	0.09	0.902	0.875	0.911	0.851	0.867	0.09	0.875	0.878	0.885	0.878	0.909	0.831	0.942	0.885	0.874	0.746	0.829	1.291	0.895	0.908	0.901	0.901	0.924	0.907	0.921	0.92	0.794	0.892	0.849	0.865	0.784	0.913	0.894	0.874	0.89
	1 day, 12:50:09	29.5	0.09	0.902	0.896	0.864	0.872	0.872	0.752	0.835	0.876	0.842	0.781	0.09	0.899	0.877	0.911	0.852	0.869	0.09	0.876	0.879	0.884	0.878	0.91	0.833	0.941	0.887	0.874	0.747	0.83	1.291	0.896	0.909	0.902	0.902	0.924	0.907	0.921	0.921	0.795	0.893	0.849	0.866	0.787	0.913	0.896	0.872	0.886
	1 day, 12:55:09	29.5	0.09	0.904	0.897	0.863	0.873	0.873	0.753	0.835	0.876	0.841	0.781	0.09	0.896	0.879	0.911	0.852	0.871	0.09	0.876	0.879	0.884	0.877	0.91	0.833	0.941	0.887	0.876	0.747	0.831	1.293	0.896	0.911	0.902	0.901	0.925	0.907	0.923	0.922	0.796	0.893	0.847	0.867	0.788	0.915	0.896	0.875	0.893
	1 day, 13:00:09	29.5	0.09	0.905	0.898	0.865	0.874	0.874	0.754	0.837	0.876	0.842	0.783	0.09	0.899	0.88	0.909	0.853	0.871	0.09	0.875	0.878	0.884	0.88	0.91	0.834	0.94	0.888	0.876	0.749	0.832	1.294	0.896	0.91	0.902	0.902	0.926	0.907	0.924	0.922	0.797	0.892	0.849	0.868	0.789	0.916	0.896	0.875	0.894
	1 day, 13:05:09	29.5	0.09	0.906	0.898	0.865	0.874	0.874	0.755	0.837	0.876	0.843	0.785	0.09	0.901	0.879	0.911	0.852	0.871	0.09	0.878	0.88	0.885	0.88	0.911	0.836	0.942	0.889	0.876	0.75	0.832	1.294	0.897	0.91	0.906	0.903	0.926	0.91	0.923	0.923	0.8	0.893	0.85	0.869	0.79	0.916	0.898	0.876	0.889
	1 day, 13:10:09	29.5	0.09	0.907	0.899	0.867	0.875	0.875	0.757	0.837	0.877	0.844	0.786	0.09	0.899	0.882	0.913	0.854	0.873	0.09	0.877	0.881	0.887	0.879	0.912	0.838	0.944	0.891	0.876	0.751	0.832	1.294	0.899	0.91	0.906	0.903	0.927	0.909	0.924	0.923	0.802	0.893	0.851	0.869	0.791	0.918	0.899	0.877	0.889
	1 day, 13:15:09	29.5	0.09	0.908	0.9	0.867	0.875	0.873	0.757	0.837	0.877	0.845	0.787	0.09	0.901	0.883	0.915	0.853	0.873	0.09	0.879	0.88	0.887	0.879	0.913	0.838	0.943	0.893	0.875	0.752	0.832	1.292	0.899	0.912	0.905	0.903	0.928	0.909	0.925	0.923	0.803	0.894	0.851	0.87	0.792	0.919	0.899	0.877	0.896
	1 day, 13:20:09	29.5	0.09	0.909	0.9	0.865	0.876	0.873	0.758	0.838	0.878	0.844	0.788	0.09	0.903	0.884	0.915	0.855	0.874	0.091	0.879	0.88	0.888	0.879	0.912	0.84	0.945	0.894	0.877	0.753	0.834	1.29	0.899	0.912	0.905	0.905	0.927	0.911	0.926	0.924	0.805	0.896	0.851	0.87	0.793	0.92	0.9	0.878	0.894
	1 day, 13:25:09	29.5	0.09	0.909	0.9	0.866	0.877	0.874	0.759	0.838	0.878	0.845	0.788	0.09	0.904	0.883	0.916	0.856	0.876	0.09	0.879	0.882	0.888	0.881	0.913	0.841	0.946	0.896	0.879	0.754	0.834	1.289	0.9	0.912	0.907	0.906	0.928	0.909	0.927	0.924	0.806	0.897	0.852	0.871	0.794	0.92	0.901	0.878	0.888
	1 day, 13:30:09	29.5	0.09	0.908	0.902	0.867	0.878	0.875	0.759	0.837	0.879	0.845	0.791	0.09	0.905	0.883	0.916	0.856	0.877	0.09	0.879	0.881	0.89	0.882	0.914	0.842	0.947	0.898	0.877	0.755	0.834	1.289	0.899	0.913	0.906	0.906	0.93	0.91	0.928	0.925	0.806	0.899	0.853	0.871	0.795	0.921	0.902	0.878	0.889
	1 day, 13:35:09	29.4	0.09	0.909	0.902	0.864	0.876	0.874	0.76	0.838	0.88	0.845	0.792	0.09	0.905	0.885	0.918	0.856	0.878	0.09	0.881	0.881	0.89	0.882	0.915	0.844	0.948	0.898	0.877	0.757	0.833	1.29	0.899	0.915	0.907	0.906	0.93	0.912	0.927	0.925	0.805	0.901	0.853	0.872	0.796	0.922	0.902	0.878	0.893
	1 day, 13:40:09	29.4	0.09	0.91	0.902	0.865	0.876	0.877	0.761	0.84	0.881	0.846	0.792	0.09	0.904	0.887	0.92	0.855	0.879	0.09	0.881	0.883	0.89	0.883	0.915	0.845	0.949	0.898	0.879	0.758	0.834	1.29	0.9	0.915	0.908	0.908	0.93	0.913	0.927	0.924	0.806	0.901	0.853	0.873	0.797	0.923	0.902	0.88	0.89
	1 day, 13:45:09	29.4	0.09	0.91	0.903	0.866	0.877	0.876	0.762	0.838	0.881	0.846	0.794	0.09	0.905	0.889	0.918	0.855	0.879	0.09	0.882	0.883	0.891	0.883	0.914	0.846	0.95	0.899	0.878	0.76	0.834	1.292	0.899	0.915	0.908	0.909	0.93	0.912	0.929	0.926	0.807	0.903	0.854	0.876	0.798	0.924	0.904	0.879	0.892
	1 day, 13:50:09	29.4	0.09	0.911	0.904	0.869	0.876	0.878	0.764	0.839	0.881	0.846	0.796	0.09	0.905	0.891	0.919	0.856	0.881	0.09	0.883	0.884	0.893	0.883	0.917	0.848	0.953	0.902	0.88	0.76	0.836	1.293	0.901	0.915	0.911	0.909	0.931	0.912	0.931	0.927	0.807	0.904	0.853	0.877	0.8	0.924	0.906	0.881	0.896
	1 day, 13:55:09	29.4	0.09	0.91	0.904	0.869	0.878	0.878	0.764	0.838	0.878	0.847	0.797	0.09	0.905	0.891	0.919	0.857	0.88	0.09	0.882	0.885	0.893	0.883	0.916	0.849	0.952	0.902	0.882	0.761	0.834	1.291	0.903	0.917	0.911	0.91	0.931	0.911	0.931	0.927	0.807	0.904	0.852	0.878	0.801	0.925	0.906	0.881	0.896
	1 day, 14:00:09	29.4	0.09	0.91	0.905	0.869	0.879	0.879	0.765	0.84	0.881	0.847	0.799	0.09	0.906	0.891	0.919	0.858	0.882	0.09	0.883	0.884	0.894	0.883	0.918	0.851	0.951	0.904	0.881	0.763	0.837	1.291	0.902	0.918	0.911	0.911	0.93	0.913	0.933	0.928	0.81	0.907	0.853	0.878	0.802	0.926	0.906	0.882	0.894
	1 day, 14:05:09	29.4	0.09	0.91	0.906	0.866	0.878	0.88	0.766	0.841	0.88	0.847	0.799	0.09	0.906	0.892	0.919	0.857	0.884	0.09	0.881	0.885	0.895	0.884	0.918	0.853	0.953	0.906	0.884	0.764	0.838	1.29	0.901	0.919	0.91	0.912	0.932	0.915	0.934	0.928	0.812	0.907	0.852	0.88	0.802	0.927	0.906	0.881	0.893
	1 day, 14:10:09	29.4	0.09	0.91	0.907	0.868	0.879	0.879	0.768	0.84	0.878	0.847	0.801	0.09	0.908	0.892	0.92	0.858	0.885	0.09	0.884	0.885	0.894	0.884	0.919	0.853	0.955	0.908	0.883	0.765	0.837	1.288	0.9	0.917	0.911	0.911	0.933	0.916	0.932	0.929	0.814	0.908	0.852	0.881	0.804	0.928	0.907	0.882	0.899
	1 day, 14:15:09	29.3	0.09	0.911	0.907	0.869	0.879	0.879	0.77	0.842	0.876	0.847	0.803	0.09	0.908	0.892	0.921	0.858	0.885	0.09	0.885	0.887	0.895	0.885	0.917	0.856	0.957	0.91	0.886	0.766	0.838	1.287	0.903	0.918	0.911	0.912	0.933	0.914	0.934	0.929	0.817	0.909	0.852	0.882	0.805	0.928	0.909	0.883	0.899
	1 day, 14:20:09	29.3	0.09	0.911	0.908	0.869	0.879	0.879	0.771	0.842	0.877	0.846	0.804	0.09	0.908	0.891	0.923	0.86	0.885	0.09	0.884	0.888	0.897	0.885	0.918	0.858	0.957	0.911	0.886	0.767	0.839	1.288	0.9	0.919	0.913	0.912	0.932	0.917	0.935	0.928	0.818	0.909	0.855	0.883	0.805	0.929	0.91	0.882	0.896
	1 day, 14:25:09	29.3	0.09	0.912	0.909	0.87	0.88	0.879	0.772	0.841	0.892	0.846	0.806	0.09	0.909	0.891	0.926	0.862	0.887	0.09	0.883	0.888	0.896	0.886	0.92	0.859	0.959	0.914	0.885	0.768	0.84	1.288	0.902	0.922	0.914	0.914	0.934	0.916	0.934	0.93	0.82	0.911	0.857	0.883	0.807	0.93	0.91	0.883	0.897
	1 day, 14:30:09	29.3	0.09	0.912	0.909	0.872	0.88	0.881	0.775	0.841	0.903	0.847	0.807	0.09	0.91	0.892	0.927	0.86	0.888	0.09	0.886	0.89	0.896	0.886	0.921	0.86	0.962	0.917	0.888	0.769	0.839	1.289	0.903	0.922	0.914	0.914	0.935	0.916	0.935	0.931	0.821	0.912	0.856	0.884	0.809	0.931	0.912	0.884	0.9
	1 day, 14:35:09	29.3	0.09	0.913	0.909	0.869	0.882	0.882	0.776	0.841	0.911	0.847	0.808	0.09	0.91	0.895	0.927	0.861	0.888	0.09	0.887	0.889	0.898	0.886	0.92	0.861	0.962	0.918	0.89	0.771	0.841	1.29	0.905	0.922	0.915	0.915	0.934	0.918	0.939	0.93	0.821	0.913	0.858	0.884	0.811	0.932	0.913	0.884	0.899
	1 day, 14:40:09	29.3	0.09	0.913	0.909	0.87	0.883	0.882	0.777	0.842	0.916	0.848	0.811	0.09	0.909	0.897	0.925	0.864	0.889	0.09	0.887	0.889	0.899	0.888	0.921	0.862	0.963	0.919	0.889	0.772	0.842	1.291	0.904	0.923	0.917	0.915	0.935	0.917	0.942	0.93	0.822	0.914	0.858	0.885	0.812	0.933	0.913	0.884	0.897
	1 day, 14:45:09	29.3	0.09	0.913	0.91	0.87	0.883	0.882	0.778	0.843	0.92	0.848	0.811	0.09	0.911	0.897	0.924	0.863	0.89	0.09	0.888	0.889	0.898	0.888	0.922	0.863	0.966	0.922	0.89	0.773	0.842	1.29	0.904	0.924	0.918	0.915	0.936	0.918	0.941	0.931	0.823	0.915	0.859	0.886	0.813	0.934	0.914	0.884	0.899
	1 day, 14:50:09	29.3	0.09	0.914	0.911	0.872	0.883	0.883	0.781	0.844	0.923	0.847	0.813	0.09	0.912	0.899	0.925	0.864	0.891	0.09	0.887	0.89	0.898	0.889	0.922	0.865	0.966	0.936	0.893	0.775	0.842	1.289	0.906	0.923	0.917	0.916	0.939	0.92	0.94	0.931	0.824	0.915	0.859	0.886	0.814	0.934	0.915	0.887	0.899
	1 day, 14:55:09	29.2	0.09	0.914	0.911	0.871	0.883	0.884	0.781	0.843	0.927	0.847	0.814	0.09	0.908	0.901	0.926	0.865	0.891	0.09	0.887	0.889	0.899	0.889	0.922	0.868	0.967	0.944	0.895	0.776	0.843	1.287	0.907	0.924	0.918	0.917	0.939	0.919	0.94	0.931	0.826	0.915	0.86	0.887	0.816	0.936	0.916	0.888	0.9
	1 day, 15:00:09	29.2	0.09	0.913	0.912	0.869	0.884	0.883	0.783	0.842	0.928	0.847	0.814	0.09	0.909	0.902	0.926	0.865	0.891	0.09	0.887	0.89	0.898	0.889	0.923	0.868	0.968	0.949	0.895	0.777	0.844	1.286	0.906	0.925	0.917	0.917	0.94	0.92	0.943	0.932	0.827	0.916	0.859	0.888	0.817	0.936	0.916	0.886	0.898
	1 day, 15:05:09	29.2	0.09	0.913	0.911	0.869	0.883	0.883	0.784	0.843	0.93	0.847	0.815	0.09	0.912	0.904	0.926	0.865	0.892	0.09	0.887	0.891	0.899	0.891	0.923	0.869	0.969	0.952	0.896	0.777	0.844	1.285	0.906	0.924	0.919	0.916	0.941	0.92	0.946	0.931	0.828	0.918	0.858	0.888	0.818	0.937	0.918	0.886	0.901
	1 day, 15:10:09	29.2	0.09	0.914	0.913	0.872	0.883	0.884	0.787	0.845	0.934	0.848	0.817	0.09	0.914	0.905	0.926	0.868	0.893	0.09	0.886	0.892	0.9	0.892	0.925	0.868	0.97	0.954	0.897	0.778	0.845	1.286	0.908	0.924	0.92	0.917	0.943	0.92	0.945	0.93	0.828	0.919	0.857	0.889	0.818	0.938	0.92	0.887	0.901
	1 day, 15:15:09	29.2	0.09	0.914	0.914	0.874	0.884	0.886	0.788	0.844	0.936	0.849	0.818	0.09	0.91	0.905	0.926	0.87	0.894	0.09	0.89	0.891	0.901	0.891	0.924	0.869	0.971	0.966	0.899	0.779	0.845	1.286	0.908	0.925	0.92	0.919	0.943	0.921	0.944	0.931	0.829	0.919	0.856	0.89	0.82	0.939	0.92	0.888	0.897
	1 day, 15:20:09	29.2	0.09	0.915	0.915	0.871	0.884	0.886	0.789	0.847	0.937	0.848	0.818	0.09	0.911	0.907	0.927	0.871	0.895	0.09	0.89	0.892	0.901	0.892	0.925	0.87	0.972	1.011	0.901	0.78	0.846	1.287	0.908	0.924	0.921	0.918	0.942	0.921	0.945	0.932	0.83	0.92	0.857	0.891	0.822	0.941	0.922	0.886	0.904
	1 day, 15:25:09	29.2	0.09	0.915	0.916	0.872	0.884	0.885	0.791	0.847	0.938	0.847	0.82	0.09	0.913	0.907	0.928	0.873	0.895	0.09	0.889	0.892	0.902	0.893	0.924	0.872	0.975	1.036	0.901	0.782	0.846	1.288	0.909	0.926	0.922	0.92	0.943	0.922	0.947	0.932	0.833	0.919	0.859	0.891	0.823	0.94	0.922	0.886	0.9
	1 day, 15:30:09	29.2	0.09	0.915	0.917	0.873	0.883	0.885	0.791	0.846	0.937	0.847	0.823	0.09	0.913	0.908	0.928	0.873	0.896	0.09	0.891	0.893	0.903	0.892	0.924	0.874	0.976	1.047	0.902	0.783	0.846	1.289	0.909	0.925	0.924	0.921	0.944	0.922	0.949	0.933	0.834	0.92	0.86	0.892	0.824	0.941	0.923	0.888	0.903
	1 day, 15:35:09	29.2	0.09	0.916	0.918	0.873	0.882	0.886	0.792	0.847	0.937	0.847	0.824	0.09	0.911	0.908	0.93	0.874	0.896	0.09	0.892	0.893	0.903	0.892	0.927	0.875	0.978	1.053	0.903	0.785	0.848	1.289	0.909	0.925	0.923	0.921	0.944	0.923	0.949	0.935	0.835	0.922	0.862	0.893	0.824	0.943	0.924	0.886	0.899
	1 day, 15:40:09	29.2	0.09	0.917	0.919	0.872	0.882	0.887	0.793	0.848	0.938	0.849	0.826	0.09	0.914	0.908	0.931	0.874	0.897	0.09	0.892	0.894	0.904	0.892	0.926	0.876	0.978	1.057	0.903	0.787	0.848	1.287	0.91	0.927	0.923	0.921	0.946	0.924	0.948	0.934	0.837	0.923	0.863	0.894	0.825	0.944	0.925	0.887	0.902
	1 day, 15:45:09	29.2	0.09	0.916	0.918	0.873	0.883	0.887	0.795	0.847	0.94	0.848	0.829	0.09	0.915	0.909	0.931	0.874	0.898	0.09	0.892	0.896	0.905	0.893	0.927	0.878	0.978	1.059	0.904	0.788	0.847	1.286	0.91	0.927	0.925	0.921	0.946	0.923	0.949	0.935	0.838	0.925	0.863	0.894	0.827	0.944	0.926	0.887	0.906
	1 day, 15:50:09	29.2	0.09	0.917	0.919	0.872	0.884	0.887	0.796	0.847	0.943	0.849	0.831	0.09	0.914	0.909	0.93	0.873	0.899	0.09	0.893	0.896	0.905	0.894	0.928	0.879	0.981	1.06	0.904	0.789	0.849	1.284	0.91	0.927	0.925	0.922	0.947	0.923	0.953	0.934	0.839	0.925	0.864	0.895	0.83	0.945	0.928	0.889	0.902
	1 day, 15:55:09	29.2	0.09	0.916	0.92	0.87	0.884	0.888	0.798	0.848	0.946	0.85	0.833	0.09	0.916	0.911	0.929	0.874	0.899	0.09	0.893	0.897	0.906	0.895	0.929	0.881	0.982	1.062	0.905	0.79	0.849	1.284	0.909	0.928	0.924	0.921	0.948	0.925	0.955	0.932	0.84	0.925	0.863	0.897	0.831	0.946	0.927	0.888	0.906
	1 day, 16:00:09	29.2	0.09	0.917	0.921	0.871	0.885	0.886	0.801	0.849	0.95	0.85	0.833	0.09	0.918	0.911	0.928	0.875	0.899	0.09	0.894	0.895	0.905	0.893	0.928	0.883	0.983	1.064	0.905	0.791	0.849	1.285	0.91	0.927	0.924	0.92	0.948	0.926	0.954	0.935	0.841	0.924	0.864	0.898	0.832	0.947	0.928	0.888	0.903
	1 day, 16:05:09	29.2	0.09	0.916	0.92	0.872	0.884	0.887	0.801	0.849	0.951	0.85	0.834	0.09	0.916	0.911	0.927	0.875	0.9	0.09	0.894	0.895	0.906	0.895	0.928	0.883	0.983	1.065	0.906	0.792	0.85	1.285	0.91	0.929	0.926	0.922	0.948	0.926	0.953	0.936	0.843	0.922	0.864	0.898	0.833	0.947	0.93	0.889	0.906
	1 day, 16:10:09	29.1	0.09	0.918	0.921	0.876	0.885	0.888	0.803	0.851	0.952	0.851	0.834	0.09	0.915	0.913	0.926	0.875	0.9	0.09	0.894	0.898	0.907	0.895	0.929	0.884	0.985	1.066	0.907	0.793	0.851	1.287	0.912	0.93	0.926	0.922	0.949	0.927	0.954	0.935	0.846	0.923	0.865	0.899	0.833	0.948	0.931	0.888	0.905
	1 day, 16:15:09	29.1	0.09	0.916	0.921	0.874	0.884	0.887	0.805	0.851	0.953	0.851	0.836	0.09	0.917	0.914	0.927	0.875	0.901	0.09	0.894	0.899	0.908	0.896	0.93	0.885	0.986	1.068	0.907	0.795	0.85	1.287	0.912	0.93	0.927	0.922	0.948	0.926	0.954	0.935	0.846	0.925	0.866	0.901	0.835	0.949	0.932	0.889	0.908
	1 day, 16:20:09	29.1	0.09	0.918	0.921	0.873	0.884	0.886	0.806	0.852	0.953	0.852	0.839	0.09	0.918	0.915	0.928	0.875	0.902	0.09	0.893	0.9	0.908	0.897	0.931	0.887	0.986	1.07	0.907	0.798	0.85	1.287	0.911	0.931	0.929	0.923	0.949	0.927	0.956	0.935	0.847	0.927	0.867	0.902	0.835	0.95	0.933	0.89	0.907
	1 day, 16:25:09	29.1	0.09	0.916	0.922	0.873	0.884	0.887	0.808	0.852	0.954	0.852	0.841	0.09	0.916	0.916	0.927	0.876	0.901	0.09	0.895	0.9	0.907	0.896	0.931	0.887	0.985	1.072	0.908	0.799	0.851	1.286	0.914	0.931	0.928	0.923	0.949	0.928	0.956	0.935	0.846	0.928	0.866	0.902	0.836	0.951	0.934	0.89	0.908
	1 day, 16:30:09	29.1	0.09	0.918	0.922	0.873	0.885	0.889	0.809	0.85	0.953	0.853	0.843	0.09	0.917	0.918	0.928	0.877	0.9	0.09	0.895	0.899	0.908	0.899	0.93	0.889	0.987	1.075	0.91	0.799	0.851	1.283	0.913	0.931	0.927	0.922	0.949	0.929	0.957	0.934	0.847	0.93	0.866	0.903	0.837	0.951	0.934	0.888	0.908
	1 day, 16:35:09	29.1	0.09	0.918	0.922	0.874	0.886	0.887	0.812	0.853	0.955	0.853	0.845	0.09	0.92	0.919	0.93	0.877	0.899	0.09	0.896	0.899	0.908	0.899	0.931	0.891	0.988	1.077	0.909	0.802	0.851	1.282	0.913	0.93	0.929	0.925	0.95	0.93	0.959	0.935	0.849	0.93	0.865	0.904	0.839	0.952	0.936	0.89	0.908
	1 day, 16:40:09	29.1	0.09	0.918	0.923	0.875	0.886	0.889	0.813	0.852	0.956	0.853	0.845	0.09	0.918	0.919	0.93	0.878	0.9	0.09	0.895	0.901	0.908	0.898	0.93	0.892	0.99	1.077	0.911	0.802	0.852	1.281	0.914	0.933	0.928	0.924	0.95	0.93	0.959	0.936	0.852	0.929	0.865	0.904	0.838	0.953	0.936	0.892	0.906
	1 day, 16:45:09	29.1	0.09	0.919	0.925	0.878	0.888	0.891	0.815	0.855	0.959	0.853	0.846	0.09	0.919	0.919	0.931	0.879	0.902	0.09	0.897	0.902	0.909	0.902	0.933	0.893	0.99	1.08	0.911	0.803	0.852	1.282	0.913	0.933	0.93	0.924	0.951	0.931	0.959	0.937	0.855	0.93	0.864	0.905	0.839	0.954	0.937	0.889	0.908
	1 day, 16:50:09	29.1	0.09	0.919	0.925	0.877	0.888	0.891	0.816	0.854	0.96	0.852	0.849	0.09	0.922	0.921	0.93	0.879	0.903	0.09	0.898	0.903	0.908	0.902	0.934	0.894	0.99	1.082	0.912	0.804	0.853	1.283	0.913	0.935	0.932	0.926	0.952	0.931	0.96	0.939	0.858	0.931	0.864	0.905	0.842	0.954	0.939	0.891	0.909
	1 day, 16:55:09	29.1	0.09	0.919	0.925	0.875	0.888	0.891	0.818	0.855	0.96	0.853	0.851	0.09	0.921	0.921	0.93	0.88	0.903	0.09	0.897	0.904	0.91	0.901	0.934	0.895	0.991	1.083	0.913	0.806	0.853	1.285	0.914	0.934	0.931	0.926	0.952	0.931	0.96	0.938	0.86	0.931	0.865	0.905	0.844	0.954	0.94	0.892	0.91
	1 day, 17:00:09	29.1	0.09	0.919	0.924	0.874	0.887	0.892	0.818	0.856	0.96	0.852	0.852	0.09	0.919	0.922	0.931	0.881	0.902	0.09	0.899	0.903	0.91	0.902	0.934	0.898	0.991	1.084	0.914	0.807	0.852	1.285	0.913	0.934	0.932	0.927	0.952	0.932	0.962	0.938	0.861	0.93	0.866	0.906	0.845	0.955	0.94	0.892	0.911
	1 day, 17:05:09	29.1	0.09	0.92	0.924	0.874	0.889	0.892	0.819	0.856	0.96	0.852	0.852	0.09	0.922	0.924	0.93	0.882	0.901	0.09	0.899	0.902	0.911	0.903	0.934	0.899	0.991	1.084	0.915	0.808	0.853	1.284	0.913	0.934	0.932	0.927	0.952	0.934	0.961	0.937	0.862	0.93	0.867	0.906	0.846	0.956	0.94	0.891	0.912
	1 day, 17:10:09	29.1	0.09	0.922	0.925	0.877	0.889	0.893	0.821	0.856	0.96	0.853	0.855	0.09	0.924	0.924	0.931	0.883	0.902	0.09	0.9	0.904	0.912	0.904	0.936	0.901	0.991	1.085	0.916	0.809	0.854	1.284	0.915	0.934	0.933	0.927	0.954	0.934	0.962	0.938	0.864	0.933	0.868	0.908	0.847	0.956	0.942	0.892	0.913
	1 day, 17:15:09	29.1	0.09	0.921	0.924	0.876	0.889	0.893	0.822	0.858	0.959	0.853	0.856	0.09	0.921	0.924	0.93	0.884	0.901	0.09	0.899	0.905	0.913	0.903	0.936	0.902	0.993	1.085	0.917	0.81	0.854	1.281	0.914	0.935	0.933	0.927	0.953	0.934	0.962	0.939	0.865	0.934	0.868	0.909	0.848	0.957	0.942	0.892	0.913
	1 day, 17:20:09	29.1	0.09	0.921	0.924	0.875	0.89	0.893	0.824	0.858	0.958	0.853	0.857	0.09	0.922	0.926	0.931	0.884	0.901	0.09	0.899	0.905	0.913	0.903	0.937	0.903	0.993	1.086	0.918	0.811	0.855	1.279	0.914	0.935	0.932	0.927	0.954	0.935	0.964	0.939	0.866	0.935	0.869	0.91	0.848	0.958	0.942	0.892	0.911
	1 day, 17:25:09	29	0.09	0.921	0.923	0.875	0.888	0.893	0.825	0.859	0.959	0.855	0.858	0.09	0.924	0.926	0.932	0.885	0.901	0.09	0.901	0.906	0.916	0.907	0.935	0.903	0.993	1.086	0.92	0.813	0.854	1.279	0.915	0.934	0.932	0.928	0.953	0.936	0.965	0.939	0.867	0.934	0.869	0.91	0.849	0.958	0.944	0.892	0.917
	1 day, 17:30:09	29.1	0.09	0.921	0.923	0.877	0.889	0.894	0.828	0.859	0.958	0.856	0.859	0.09	0.922	0.927	0.931	0.885	0.901	0.09	0.9	0.904	0.914	0.905	0.936	0.905	0.993	1.086	0.919	0.813	0.855	1.28	0.915	0.935	0.934	0.929	0.955	0.937	0.964	0.939	0.868	0.933	0.869	0.911	0.851	0.958	0.944	0.892	0.916
	1 day, 17:35:09	29	0.09	0.92	0.924	0.878	0.889	0.895	0.828	0.86	0.961	0.856	0.861	0.09	0.922	0.928	0.931	0.886	0.901	0.09	0.9	0.905	0.915	0.906	0.938	0.906	0.994	1.087	0.921	0.814	0.855	1.28	0.915	0.935	0.933	0.93	0.955	0.935	0.963	0.94	0.869	0.932	0.868	0.911	0.853	0.959	0.944	0.892	0.919
	1 day, 17:40:09	29	0.09	0.921	0.925	0.879	0.89	0.895	0.829	0.863	0.962	0.856	0.863	0.09	0.925	0.927	0.932	0.888	0.902	0.09	0.9	0.905	0.916	0.906	0.938	0.906	0.994	1.089	0.921	0.815	0.855	1.28	0.916	0.936	0.934	0.93	0.956	0.937	0.964	0.941	0.87	0.933	0.869	0.913	0.854	0.959	0.946	0.893	0.92
	1 day, 17:45:09	29	0.09	0.921	0.926	0.88	0.891	0.895	0.831	0.861	0.962	0.857	0.863	0.09	0.929	0.928	0.934	0.888	0.903	0.09	0.9	0.905	0.918	0.909	0.938	0.908	0.994	1.089	0.923	0.817	0.855	1.281	0.918	0.938	0.935	0.93	0.956	0.938	0.966	0.941	0.873	0.936	0.868	0.913	0.854	0.959	0.947	0.893	0.921
	1 day, 17:50:09	29	0.09	0.921	0.926	0.879	0.891	0.895	0.831	0.862	0.963	0.856	0.863	0.09	0.927	0.93	0.934	0.887	0.903	0.09	0.902	0.905	0.918	0.91	0.939	0.909	0.995	1.089	0.924	0.817	0.856	1.281	0.918	0.937	0.935	0.931	0.956	0.939	0.965	0.941	0.873	0.939	0.868	0.914	0.854	0.961	0.947	0.892	0.92
	1 day, 17:55:09	29	0.09	0.922	0.926	0.878	0.892	0.896	0.832	0.863	0.964	0.857	0.865	0.09	0.926	0.931	0.936	0.887	0.903	0.09	0.902	0.906	0.916	0.907	0.939	0.91	0.996	1.09	0.924	0.819	0.857	1.281	0.918	0.938	0.936	0.932	0.957	0.94	0.966	0.942	0.873	0.939	0.872	0.914	0.853	0.961	0.948	0.894	0.922
	1 day, 18:00:09	29	0.09	0.922	0.926	0.878	0.892	0.895	0.833	0.862	0.963	0.857	0.865	0.09	0.93	0.932	0.937	0.887	0.902	0.09	0.902	0.907	0.918	0.912	0.939	0.91	0.996	1.091	0.924	0.821	0.856	1.28	0.921	0.938	0.937	0.932	0.958	0.941	0.966	0.942	0.872	0.939	0.87	0.915	0.855	0.96	0.949	0.894	0.923
	1 day, 18:05:09	29	0.09	0.923	0.927	0.879	0.893	0.896	0.834	0.865	0.964	0.857	0.866	0.09	0.931	0.933	0.937	0.887	0.903	0.09	0.903	0.907	0.919	0.91	0.939	0.911	0.997	1.09	0.924	0.823	0.857	1.28	0.92	0.937	0.937	0.932	0.959	0.941	0.968	0.942	0.874	0.935	0.872	0.916	0.857	0.96	0.952	0.894	0.922
	1 day, 18:10:09	29	0.09	0.922	0.928	0.879	0.894	0.897	0.836	0.864	0.965	0.856	0.868	0.09	0.929	0.933	0.938	0.887	0.903	0.09	0.904	0.906	0.919	0.909	0.939	0.912	0.998	1.091	0.925	0.824	0.857	1.277	0.919	0.937	0.937	0.932	0.959	0.942	0.969	0.943	0.875	0.934	0.872	0.916	0.86	0.962	0.951	0.895	0.923
	1 day, 18:15:09	29	0.09	0.922	0.928	0.879	0.894	0.897	0.837	0.865	0.966	0.856	0.868	0.09	0.93	0.935	0.939	0.889	0.903	0.09	0.903	0.909	0.917	0.914	0.941	0.914	0.999	1.092	0.925	0.825	0.857	1.275	0.922	0.938	0.938	0.932	0.961	0.943	0.97	0.943	0.876	0.937	0.871	0.917	0.862	0.96	0.952	0.896	0.923
	1 day, 18:20:09	29	0.09	0.921	0.929	0.879	0.894	0.897	0.838	0.868	0.966	0.856	0.869	0.09	0.929	0.935	0.94	0.889	0.903	0.09	0.904	0.909	0.917	0.912	0.941	0.914	0.999	1.092	0.926	0.825	0.857	1.274	0.921	0.938	0.938	0.932	0.96	0.944	0.968	0.943	0.877	0.938	0.872	0.918	0.862	0.963	0.954	0.895	0.922
	1 day, 18:25:09	29	0.09	0.922	0.93	0.879	0.895	0.897	0.839	0.868	0.968	0.856	0.871	0.09	0.928	0.936	0.941	0.888	0.903	0.09	0.905	0.909	0.918	0.914	0.942	0.915	1.001	1.093	0.927	0.826	0.858	1.275	0.921	0.939	0.938	0.933	0.961	0.945	0.969	0.942	0.879	0.939	0.872	0.918	0.863	0.963	0.953	0.897	0.921
	1 day, 18:30:09	29	0.09	0.922	0.93	0.879	0.895	0.898	0.838	0.869	0.968	0.856	0.872	0.09	0.929	0.937	0.941	0.888	0.904	0.09	0.905	0.911	0.918	0.916	0.943	0.916	1.003	1.093	0.927	0.827	0.858	1.275	0.922	0.94	0.94	0.934	0.96	0.945	0.97	0.943	0.88	0.941	0.872	0.92	0.864	0.964	0.955	0.897	0.919
	1 day, 18:35:09	29	0.09	0.922	0.93	0.879	0.896	0.899	0.839	0.87	0.968	0.858	0.873	0.09	0.931	0.937	0.941	0.889	0.905	0.09	0.905	0.911	0.919	0.915	0.943	0.917	1.002	1.093	0.928	0.827	0.858	1.275	0.923	0.94	0.942	0.935	0.962	0.946	0.97	0.942	0.881	0.941	0.874	0.921	0.865	0.963	0.957	0.897	0.92
	1 day, 18:40:09	29	0.09	0.923	0.931	0.879	0.897	0.899	0.839	0.871	0.97	0.858	0.875	0.09	0.932	0.938	0.941	0.89	0.905	0.09	0.907	0.912	0.919	0.917	0.944	0.918	1.002	1.093	0.929	0.828	0.859	1.276	0.923	0.94	0.942	0.935	0.962	0.947	0.972	0.942	0.882	0.94	0.873	0.923	0.867	0.965	0.958	0.899	0.922
	1 day, 18:45:09	29	0.09	0.921	0.932	0.879	0.898	0.899	0.841	0.871	0.971	0.857	0.875	0.09	0.932	0.938	0.942	0.891	0.905	0.09	0.909	0.912	0.92	0.919	0.944	0.919	1.003	1.093	0.93	0.83	0.859	1.276	0.924	0.941	0.942	0.936	0.963	0.947	0.973	0.942	0.883	0.937	0.875	0.923	0.869	0.965	0.959	0.9	0.923
	1 day, 18:50:09	29	0.09	0.922	0.932	0.879	0.898	0.9	0.843	0.87	0.972	0.858	0.875	0.09	0.933	0.939	0.942	0.891	0.907	0.09	0.909	0.913	0.921	0.918	0.945	0.921	1.004	1.093	0.93	0.831	0.859	1.276	0.925	0.942	0.943	0.937	0.963	0.948	0.973	0.944	0.885	0.938	0.875	0.923	0.871	0.966	0.96	0.898	0.925
	1 day, 18:55:09	29	0.09	0.923	0.932	0.879	0.9	0.901	0.843	0.869	0.973	0.86	0.877	0.09	0.932	0.94	0.942	0.891	0.907	0.09	0.91	0.914	0.922	0.918	0.945	0.921	1.005	1.093	0.929	0.833	0.86	1.276	0.925	0.942	0.943	0.937	0.963	0.949	0.974	0.945	0.886	0.939	0.874	0.924	0.872	0.967	0.961	0.897	0.923
	1 day, 19:00:09	29	0.09	0.923	0.932	0.88	0.9	0.903	0.846	0.869	0.974	0.861	0.879	0.09	0.93	0.941	0.943	0.891	0.907	0.09	0.911	0.914	0.924	0.921	0.947	0.923	1.006	1.094	0.933	0.834	0.86	1.274	0.924	0.942	0.943	0.938	0.964	0.949	0.974	0.945	0.887	0.941	0.875	0.924	0.872	0.968	0.962	0.902	0.923
	1 day, 19:05:09	29	0.09	0.924	0.932	0.879	0.9	0.903	0.847	0.871	0.974	0.862	0.879	0.09	0.93	0.941	0.944	0.894	0.906	0.09	0.911	0.914	0.924	0.921	0.946	0.923	1.001	1.094	0.933	0.835	0.861	1.27	0.926	0.942	0.944	0.938	0.964	0.949	0.976	0.945	0.888	0.944	0.875	0.924	0.872	0.968	0.962	0.902	0.924
	1 day, 19:10:09	29	0.09	0.923	0.934	0.879	0.902	0.902	0.848	0.871	0.975	0.862	0.88	0.09	0.931	0.942	0.944	0.892	0.907	0.09	0.913	0.915	0.925	0.92	0.946	0.924	1.004	1.094	0.934	0.836	0.861	1.269	0.926	0.942	0.945	0.938	0.964	0.951	0.975	0.945	0.889	0.944	0.875	0.925	0.873	0.968	0.963	0.896	0.926
	1 day, 19:15:09	29	0.09	0.924	0.934	0.88	0.902	0.903	0.85	0.871	0.976	0.863	0.88	0.09	0.93	0.943	0.944	0.893	0.907	0.09	0.913	0.916	0.926	0.922	0.947	0.924	1.006	1.094	0.935	0.837	0.861	1.269	0.926	0.944	0.944	0.939	0.965	0.952	0.974	0.946	0.89	0.943	0.874	0.925	0.874	0.97	0.964	0.899	0.926
	1 day, 19:20:09	29	0.09	0.923	0.934	0.879	0.9	0.904	0.851	0.872	0.976	0.864	0.881	0.09	0.933	0.943	0.945	0.892	0.908	0.09	0.914	0.916	0.929	0.922	0.947	0.925	1.002	1.094	0.935	0.838	0.863	1.269	0.926	0.944	0.945	0.94	0.964	0.954	0.977	0.946	0.891	0.942	0.874	0.925	0.876	0.968	0.965	0.902	0.927
	1 day, 19:25:09	29	0.09	0.924	0.934	0.88	0.901	0.905	0.853	0.872	0.979	0.862	0.883	0.09	0.934	0.943	0.945	0.89	0.907	0.09	0.914	0.916	0.928	0.922	0.948	0.926	1.007	1.095	0.937	0.838	0.861	1.269	0.927	0.944	0.946	0.94	0.965	0.954	0.977	0.947	0.892	0.94	0.873	0.925	0.877	0.967	0.966	0.901	0.928
	1 day, 19:30:09	29	0.09	0.925	0.935	0.88	0.902	0.905	0.854	0.872	0.98	0.862	0.885	0.09	0.937	0.944	0.947	0.89	0.908	0.09	0.914	0.915	0.926	0.922	0.948	0.927	1.003	1.095	0.938	0.838	0.861	1.271	0.926	0.944	0.946	0.94	0.966	0.955	0.978	0.948	0.893	0.94	0.873	0.926	0.878	0.969	0.967	0.898	0.93
	1 day, 19:35:09	29	0.09	0.925	0.935	0.881	0.902	0.905	0.854	0.874	0.981	0.864	0.884	0.09	0.937	0.944	0.947	0.891	0.91	0.09	0.915	0.916	0.929	0.924	0.949	0.927	1.006	1.095	0.938	0.839	0.862	1.27	0.927	0.944	0.946	0.941	0.966	0.955	0.978	0.95	0.894	0.942	0.873	0.926	0.879	0.97	0.968	0.903	0.931
	1 day, 19:40:09	29	0.09	0.925	0.936	0.881	0.903	0.907	0.857	0.875	0.981	0.861	0.885	0.09	0.935	0.946	0.948	0.893	0.911	0.09	0.914	0.916	0.929	0.924	0.95	0.929	1.009	1.095	0.938	0.84	0.862	1.27	0.929	0.945	0.948	0.941	0.966	0.956	0.979	0.95	0.895	0.943	0.872	0.927	0.88	0.967	0.969	0.904	0.931
	1 day, 19:45:09	29	0.09	0.925	0.937	0.88	0.905	0.907	0.858	0.874	0.982	0.862	0.887	0.09	0.936	0.947	0.949	0.891	0.91	0.09	0.915	0.917	0.929	0.924	0.951	0.93	1.007	1.095	0.939	0.842	0.863	1.269	0.928	0.945	0.947	0.942	0.967	0.956	0.98	0.949	0.896	0.943	0.872	0.928	0.881	0.968	0.97	0.899	0.93
	1 day, 19:50:09	29	0.09	0.926	0.936	0.88	0.905	0.908	0.86	0.875	0.981	0.863	0.888	0.09	0.935	0.947	0.95	0.894	0.911	0.09	0.916	0.918	0.93	0.925	0.952	0.931	1.008	1.096	0.938	0.844	0.862	1.268	0.929	0.945	0.949	0.942	0.967	0.957	0.98	0.949	0.896	0.944	0.873	0.928	0.882	0.969	0.972	0.901	0.929
	1 day, 19:55:09	29	0.09	0.925	0.937	0.879	0.905	0.91	0.861	0.875	0.982	0.861	0.889	0.09	0.934	0.948	0.95	0.896	0.911	0.09	0.916	0.92	0.93	0.925	0.951	0.931	1.006	1.096	0.94	0.845	0.862	1.266	0.93	0.945	0.949	0.941	0.968	0.957	0.98	0.949	0.897	0.945	0.874	0.927	0.884	0.968	0.972	0.905	0.929
	1 day, 20:00:09	29	0.09	0.926	0.937	0.882	0.905	0.909	0.861	0.875	0.983	0.861	0.89	0.09	0.936	0.949	0.95	0.894	0.913	0.09	0.917	0.918	0.93	0.925	0.952	0.932	1.008	1.096	0.939	0.846	0.864	1.263	0.93	0.947	0.949	0.942	0.968	0.957	0.982	0.95	0.898	0.946	0.874	0.928	0.883	0.969	0.973	0.904	0.929
	1 day, 20:05:09	29	0.09	0.926	0.938	0.883	0.906	0.91	0.863	0.875	0.984	0.863	0.891	0.09	0.936	0.95	0.95	0.896	0.914	0.09	0.916	0.92	0.93	0.926	0.953	0.933	1.007	1.098	0.941	0.847	0.863	1.261	0.93	0.947	0.95	0.943	0.969	0.958	0.983	0.951	0.9	0.947	0.874	0.929	0.883	0.971	0.974	0.904	0.93
	1 day, 20:10:09	29	0.09	0.927	0.938	0.884	0.906	0.91	0.864	0.876	0.984	0.865	0.892	0.09	0.935	0.95	0.951	0.893	0.916	0.09	0.918	0.921	0.931	0.927	0.954	0.935	1.006	1.097	0.941	0.846	0.864	1.261	0.931	0.946	0.95	0.943	0.97	0.958	0.981	0.951	0.901	0.946	0.875	0.93	0.883	0.97	0.975	0.904	0.929
	1 day, 20:15:09	29	0.09	0.927	0.938	0.882	0.905	0.911	0.864	0.877	0.983	0.865	0.892	0.09	0.938	0.95	0.951	0.892	0.915	0.09	0.919	0.921	0.932	0.928	0.954	0.935	1.007	1.097	0.94	0.848	0.864	1.261	0.932	0.946	0.951	0.943	0.97	0.959	0.982	0.952	0.903	0.947	0.875	0.93	0.884	0.971	0.976	0.906	0.93
	1 day, 20:20:09	29	0.09	0.927	0.938	0.881	0.906	0.913	0.865	0.876	0.984	0.866	0.894	0.09	0.938	0.951	0.951	0.895	0.915	0.09	0.918	0.922	0.932	0.929	0.954	0.935	1.01	1.097	0.942	0.849	0.864	1.26	0.932	0.948	0.952	0.943	0.971	0.96	0.983	0.952	0.904	0.947	0.874	0.931	0.883	0.974	0.977	0.907	0.932
	1 day, 20:25:09	29	0.09	0.929	0.938	0.881	0.907	0.914	0.866	0.876	0.985	0.865	0.895	0.09	0.939	0.952	0.952	0.897	0.916	0.09	0.92	0.923	0.934	0.929	0.955	0.937	1.012	1.098	0.942	0.85	0.865	1.262	0.933	0.949	0.953	0.945	0.972	0.96	0.984	0.952	0.905	0.945	0.876	0.933	0.884	0.975	0.979	0.905	0.934
	1 day, 20:30:09	29	0.09	0.928	0.938	0.881	0.908	0.913	0.868	0.878	0.986	0.868	0.895	0.09	0.941	0.952	0.952	0.895	0.917	0.09	0.921	0.924	0.934	0.93	0.955	0.937	1.008	1.098	0.941	0.851	0.865	1.261	0.933	0.947	0.953	0.944	0.971	0.961	0.985	0.952	0.906	0.944	0.875	0.933	0.884	0.974	0.979	0.905	0.933
	1 day, 20:35:09	29	0.09	0.929	0.94	0.882	0.908	0.913	0.869	0.878	0.987	0.867	0.895	0.09	0.944	0.952	0.953	0.895	0.919	0.09	0.921	0.925	0.937	0.932	0.955	0.939	1.01	1.099	0.944	0.853	0.866	1.257	0.934	0.948	0.954	0.945	0.972	0.962	0.986	0.954	0.906	0.944	0.875	0.933	0.884	0.977	0.98	0.909	0.933
	1 day, 20:40:09	29	0.09	0.929	0.942	0.882	0.909	0.914	0.871	0.879	0.988	0.871	0.897	0.09	0.945	0.952	0.953	0.896	0.92	0.09	0.921	0.924	0.937	0.931	0.956	0.94	1.014	1.099	0.945	0.853	0.866	1.254	0.934	0.949	0.955	0.946	0.973	0.962	0.986	0.954	0.906	0.945	0.876	0.933	0.884	0.977	0.981	0.908	0.936
	1 day, 20:45:09	29	0.09	0.929	0.943	0.884	0.909	0.915	0.872	0.88	0.988	0.87	0.897	0.09	0.944	0.954	0.954	0.894	0.919	0.09	0.921	0.924	0.938	0.932	0.957	0.941	1.012	1.1	0.943	0.853	0.867	1.254	0.934	0.95	0.956	0.947	0.974	0.962	0.987	0.955	0.907	0.947	0.877	0.934	0.885	0.977	0.982	0.908	0.936
	1 day, 20:50:09	29	0.09	0.928	0.942	0.884	0.91	0.915	0.873	0.881	0.987	0.87	0.894	0.09	0.946	0.954	0.955	0.896	0.919	0.09	0.921	0.927	0.939	0.933	0.957	0.941	1.01	1.101	0.943	0.855	0.867	1.253	0.935	0.949	0.956	0.948	0.974	0.964	0.986	0.954	0.907	0.947	0.877	0.935	0.886	0.977	0.983	0.906	0.938
	1 day, 20:55:09	29	0.09	0.927	0.94	0.884	0.91	0.915	0.871	0.88	0.989	0.871	0.894	0.09	0.943	0.954	0.955	0.897	0.921	0.09	0.922	0.925	0.939	0.933	0.957	0.942	1.011	1.1	0.945	0.855	0.867	1.252	0.935	0.95	0.957	0.949	0.974	0.964	0.987	0.954	0.907	0.949	0.876	0.935	0.886	0.978	0.984	0.906	0.938
	1 day, 21:00:09	29	0.09	0.928	0.941	0.884	0.909	0.915	0.872	0.881	0.989	0.873	0.894	0.09	0.945	0.954	0.956	0.897	0.922	0.09	0.922	0.925	0.939	0.934	0.959	0.943	1.013	1.1	0.946	0.856	0.867	1.251	0.935	0.951	0.957	0.949	0.974	0.964	0.989	0.954	0.908	0.949	0.876	0.935	0.886	0.979	0.985	0.908	0.94
	1 day, 21:05:09	29	0.09	0.928	0.943	0.884	0.91	0.917	0.872	0.883	0.992	0.873	0.894	0.09	0.945	0.954	0.956	0.901	0.922	0.09	0.923	0.926	0.939	0.934	0.959	0.944	1.014	1.101	0.946	0.856	0.867	1.251	0.936	0.95	0.958	0.948	0.975	0.965	0.99	0.955	0.91	0.948	0.877	0.935	0.885	0.978	0.986	0.908	0.943
	1 day, 21:10:09	29	0.09	0.929	0.944	0.885	0.912	0.918	0.872	0.882	0.99	0.873	0.893	0.09	0.944	0.956	0.956	0.901	0.923	0.09	0.924	0.927	0.939	0.936	0.96	0.945	1.014	1.102	0.946	0.857	0.868	1.25	0.937	0.95	0.959	0.949	0.975	0.966	0.991	0.955	0.91	0.948	0.876	0.936	0.885	0.978	0.987	0.908	0.944
	1 day, 21:15:09	29	0.09	0.93	0.944	0.885	0.912	0.917	0.873	0.881	0.99	0.874	0.893	0.09	0.946	0.956	0.957	0.901	0.924	0.09	0.925	0.927	0.94	0.936	0.96	0.945	1.015	1.102	0.947	0.858	0.868	1.248	0.937	0.951	0.959	0.95	0.976	0.966	0.991	0.956	0.91	0.946	0.877	0.937	0.886	0.978	0.988	0.909	0.944
	1 day, 21:20:09	29	0.09	0.931	0.944	0.886	0.911	0.917	0.874	0.882	0.992	0.876	0.893	0.09	0.948	0.956	0.957	0.903	0.923	0.09	0.926	0.929	0.942	0.938	0.961	0.946	1.018	1.102	0.947	0.859	0.868	1.246	0.938	0.953	0.961	0.95	0.976	0.967	0.992	0.956	0.911	0.945	0.877	0.937	0.886	0.979	0.989	0.91	0.944
	1 day, 21:25:09	29	0.09	0.931	0.944	0.887	0.913	0.918	0.873	0.883	0.995	0.875	0.896	0.09	0.948	0.956	0.957	0.905	0.922	0.09	0.926	0.929	0.942	0.937	0.962	0.947	1.016	1.104	0.948	0.86	0.868	1.244	0.939	0.952	0.961	0.951	0.976	0.968	0.992	0.957	0.911	0.946	0.877	0.938	0.887	0.979	0.99	0.91	0.943
	1 day, 21:30:09	29	0.09	0.932	0.944	0.885	0.913	0.918	0.873	0.884	0.995	0.877	0.897	0.09	0.949	0.957	0.958	0.906	0.924	0.09	0.926	0.93	0.943	0.937	0.963	0.948	1.015	1.105	0.949	0.861	0.868	1.243	0.938	0.952	0.963	0.951	0.977	0.968	0.993	0.958	0.911	0.948	0.877	0.938	0.888	0.98	0.99	0.911	0.944
	1 day, 21:35:09	29	0.09	0.932	0.945	0.886	0.914	0.918	0.874	0.884	0.994	0.879	0.896	0.09	0.948	0.958	0.959	0.907	0.925	0.09	0.928	0.931	0.942	0.939	0.962	0.948	1.016	1.105	0.95	0.86	0.868	1.241	0.939	0.952	0.963	0.952	0.977	0.969	0.993	0.958	0.912	0.949	0.878	0.938	0.889	0.978	0.99	0.911	0.944
	1 day, 21:40:09	29	0.09	0.932	0.946	0.887	0.914	0.919	0.875	0.884	0.993	0.879	0.897	0.09	0.948	0.958	0.96	0.907	0.925	0.09	0.928	0.933	0.944	0.94	0.963	0.95	1.015	1.105	0.951	0.861	0.869	1.238	0.94	0.953	0.963	0.953	0.978	0.968	0.994	0.958	0.912	0.951	0.877	0.939	0.888	0.98	0.992	0.913	0.945
	1 day, 21:45:09	29	0.09	0.933	0.947	0.887	0.916	0.92	0.872	0.887	0.995	0.882	0.898	0.09	0.948	0.959	0.961	0.907	0.925	0.09	0.928	0.935	0.945	0.941	0.964	0.951	1.014	1.106	0.952	0.861	0.869	1.236	0.94	0.954	0.964	0.954	0.979	0.97	0.994	0.959	0.912	0.951	0.877	0.939	0.889	0.979	0.992	0.912	0.945
	1 day, 21:50:09	29	0.09	0.933	0.948	0.888	0.916	0.92	0.874	0.89	0.997	0.881	0.898	0.09	0.95	0.96	0.961	0.909	0.925	0.09	0.928	0.935	0.946	0.942	0.965	0.951	1.017	1.106	0.952	0.863	0.869	1.235	0.941	0.953	0.965	0.954	0.98	0.969	0.995	0.96	0.912	0.953	0.876	0.94	0.89	0.979	0.993	0.911	0.947
	1 day, 21:55:09	29	0.09	0.934	0.949	0.888	0.917	0.92	0.876	0.889	0.997	0.881	0.899	0.09	0.949	0.961	0.961	0.907	0.926	0.09	0.93	0.936	0.947	0.943	0.966	0.953	1.019	1.107	0.952	0.863	0.869	1.233	0.941	0.954	0.966	0.955	0.979	0.97	0.996	0.961	0.913	0.954	0.877	0.94	0.891	0.981	0.994	0.913	0.948
	1 day, 22:00:09	29	0.09	0.934	0.948	0.888	0.917	0.919	0.876	0.889	0.998	0.878	0.902	0.09	0.95	0.961	0.962	0.907	0.926	0.09	0.93	0.936	0.948	0.944	0.965	0.953	1.019	1.109	0.952	0.863	0.87	1.231	0.941	0.955	0.967	0.955	0.98	0.97	0.996	0.962	0.913	0.953	0.877	0.941	0.891	0.983	0.995	0.914	0.948
	1 day, 22:05:09	29	0.09	0.933	0.949	0.888	0.918	0.921	0.877	0.889	0.997	0.879	0.902	0.09	0.952	0.962	0.962	0.905	0.927	0.09	0.931	0.937	0.949	0.945	0.967	0.954	1.021	1.109	0.954	0.864	0.87	1.229	0.942	0.956	0.968	0.957	0.98	0.971	0.997	0.962	0.914	0.952	0.877	0.941	0.892	0.982	0.995	0.914	0.949
	1 day, 22:10:09	29	0.09	0.933	0.95	0.888	0.919	0.921	0.876	0.888	0.996	0.879	0.899	0.09	0.952	0.963	0.963	0.906	0.927	0.09	0.931	0.937	0.948	0.945	0.968	0.955	1.022	1.109	0.954	0.865	0.871	1.227	0.942	0.954	0.968	0.958	0.98	0.971	0.998	0.963	0.916	0.952	0.878	0.941	0.892	0.983	0.995	0.915	0.95
	1 day, 22:15:09	29	0.09	0.932	0.951	0.888	0.92	0.921	0.876	0.889	0.997	0.878	0.902	0.09	0.952	0.962	0.963	0.906	0.928	0.09	0.931	0.938	0.949	0.945	0.969	0.956	1.023	1.109	0.955	0.866	0.871	1.224	0.943	0.956	0.969	0.958	0.981	0.972	0.998	0.963	0.916	0.952	0.878	0.942	0.893	0.983	0.996	0.915	0.949
	1 day, 22:20:09	29	0.09	0.933	0.95	0.889	0.919	0.923	0.878	0.889	0.998	0.88	0.905	0.09	0.953	0.963	0.963	0.905	0.928	0.09	0.931	0.938	0.951	0.947	0.97	0.957	1.022	1.109	0.956	0.864	0.871	1.221	0.944	0.957	0.97	0.958	0.982	0.972	0.999	0.963	0.917	0.951	0.878	0.942	0.893	0.985	0.997	0.916	0.95
	1 day, 22:25:09	29	0.09	0.934	0.951	0.889	0.92	0.923	0.879	0.891	0.999	0.88	0.902	0.09	0.953	0.964	0.963	0.906	0.929	0.09	0.932	0.94	0.951	0.946	0.97	0.959	1.02	1.109	0.957	0.866	0.872	1.219	0.945	0.959	0.971	0.959	0.982	0.973	1	0.963	0.917	0.953	0.879	0.942	0.894	0.986	0.998	0.917	0.951
	1 day, 22:30:09	29	0.09	0.934	0.952	0.889	0.92	0.923	0.877	0.891	0.999	0.881	0.902	0.09	0.954	0.964	0.964	0.904	0.929	0.09	0.931	0.94	0.952	0.947	0.97	0.959	1.02	1.111	0.956	0.868	0.871	1.216	0.945	0.958	0.971	0.959	0.983	0.973	1.001	0.964	0.918	0.953	0.879	0.942	0.894	0.986	0.998	0.917	0.95
	1 day, 22:35:09	29	0.09	0.935	0.953	0.889	0.923	0.924	0.878	0.891	0.998	0.881	0.903	0.09	0.955	0.965	0.965	0.904	0.931	0.09	0.933	0.941	0.953	0.95	0.971	0.96	1.019	1.112	0.958	0.869	0.872	1.213	0.945	0.959	0.972	0.961	0.984	0.973	1.002	0.965	0.918	0.954	0.88	0.942	0.895	0.987	0.999	0.918	0.951
	1 day, 22:40:09	29	0.09	0.935	0.953	0.889	0.924	0.925	0.879	0.892	0.999	0.884	0.904	0.09	0.954	0.966	0.967	0.906	0.931	0.09	0.933	0.942	0.954	0.951	0.972	0.961	1.021	1.113	0.958	0.87	0.872	1.21	0.945	0.959	0.973	0.961	0.984	0.974	1.003	0.965	0.919	0.954	0.881	0.943	0.895	0.988	1	0.919	0.953
	1 day, 22:45:09	29	0.09	0.936	0.953	0.891	0.925	0.925	0.879	0.893	1.002	0.883	0.903	0.09	0.955	0.966	0.967	0.904	0.931	0.09	0.934	0.942	0.954	0.952	0.974	0.963	1.022	1.113	0.96	0.871	0.872	1.208	0.947	0.96	0.974	0.962	0.985	0.975	1.004	0.966	0.919	0.955	0.882	0.943	0.896	0.987	1.001	0.92	0.953
	1 day, 22:50:09	29	0.09	0.936	0.952	0.893	0.925	0.926	0.881	0.893	1.003	0.883	0.903	0.09	0.956	0.965	0.968	0.903	0.931	0.09	0.934	0.943	0.952	0.953	0.974	0.963	1.023	1.113	0.959	0.873	0.871	1.205	0.948	0.959	0.974	0.963	0.986	0.976	1.005	0.966	0.918	0.955	0.882	0.943	0.896	0.988	1.001	0.92	0.953
	1 day, 22:55:09	29	0.09	0.937	0.953	0.893	0.925	0.926	0.879	0.895	1.001	0.885	0.905	0.09	0.956	0.965	0.969	0.905	0.933	0.09	0.934	0.943	0.953	0.953	0.975	0.964	1.025	1.114	0.96	0.873	0.872	1.202	0.947	0.96	0.975	0.963	0.987	0.977	1.006	0.966	0.917	0.954	0.883	0.943	0.896	0.987	1.002	0.919	0.955
	1 day, 23:00:08	29	0.09	0.937	0.953	0.893	0.925	0.926	0.88	0.897	1.002	0.884	0.905	0.09	0.956	0.966	0.969	0.906	0.934	0.09	0.935	0.944	0.954	0.954	0.975	0.965	1.025	1.115	0.96	0.873	0.871	1.198	0.948	0.961	0.976	0.963	0.987	0.977	1.007	0.967	0.918	0.954	0.883	0.943	0.897	0.988	1.002	0.92	0.954
	1 day, 23:05:09	29	0.09	0.938	0.953	0.894	0.924	0.926	0.882	0.893	1.001	0.883	0.905	0.09	0.957	0.965	0.969	0.905	0.933	0.09	0.936	0.943	0.956	0.955	0.977	0.966	1.026	1.115	0.961	0.874	0.872	1.195	0.949	0.962	0.976	0.964	0.988	0.977	1.008	0.967	0.919	0.955	0.883	0.943	0.896	0.989	1.003	0.922	0.954
	1 day, 23:10:09	29	0.09	0.937	0.954	0.894	0.925	0.927	0.881	0.894	1.002	0.883	0.905	0.09	0.958	0.965	0.97	0.907	0.933	0.09	0.935	0.943	0.956	0.955	0.978	0.967	1.027	1.115	0.962	0.875	0.873	1.192	0.948	0.962	0.977	0.965	0.988	0.978	1.009	0.967	0.919	0.955	0.884	0.943	0.897	0.989	1.004	0.922	0.954
	1 day, 23:15:09	29	0.09	0.937	0.954	0.893	0.926	0.927	0.879	0.896	1.004	0.882	0.906	0.09	0.959	0.967	0.971	0.908	0.934	0.09	0.937	0.943	0.957	0.956	0.979	0.968	1.027	1.117	0.962	0.875	0.873	1.188	0.949	0.963	0.978	0.965	0.988	0.979	1.01	0.966	0.919	0.956	0.883	0.943	0.897	0.989	1.004	0.922	0.954
	1 day, 23:20:09	29	0.09	0.938	0.955	0.894	0.926	0.927	0.881	0.897	1.004	0.884	0.907	0.09	0.959	0.967	0.972	0.907	0.935	0.09	0.937	0.945	0.958	0.956	0.979	0.969	1.024	1.118	0.962	0.875	0.874	1.185	0.948	0.964	0.979	0.966	0.989	0.98	1.011	0.966	0.92	0.958	0.883	0.943	0.899	0.991	1.005	0.925	0.954
	1 day, 23:25:09	29	0.09	0.939	0.956	0.894	0.926	0.929	0.882	0.896	1.004	0.885	0.906	0.09	0.959	0.966	0.972	0.907	0.936	0.09	0.939	0.945	0.96	0.957	0.979	0.97	1.027	1.119	0.963	0.876	0.874	1.181	0.95	0.964	0.979	0.965	0.99	0.98	1.011	0.966	0.921	0.957	0.883	0.945	0.899	0.99	1.006	0.926	0.956
	1 day, 23:30:09	29	0.09	0.939	0.957	0.895	0.926	0.93	0.881	0.898	1.003	0.886	0.907	0.09	0.96	0.968	0.972	0.907	0.936	0.09	0.939	0.945	0.96	0.958	0.98	0.971	1.025	1.119	0.964	0.876	0.874	1.177	0.951	0.965	0.98	0.967	0.991	0.981	1.012	0.968	0.922	0.957	0.883	0.945	0.899	0.989	1.007	0.926	0.956
	1 day, 23:35:09	29	0.09	0.94	0.958	0.894	0.927	0.929	0.881	0.899	1.004	0.888	0.907	0.09	0.961	0.968	0.973	0.909	0.937	0.09	0.939	0.945	0.96	0.959	0.98	0.972	1.026	1.12	0.965	0.876	0.875	1.174	0.951	0.966	0.98	0.967	0.991	0.982	1.012	0.968	0.923	0.957	0.883	0.945	0.9	0.99	1.008	0.927	0.956
	1 day, 23:40:09	29	0.09	0.941	0.959	0.895	0.927	0.93	0.882	0.898	1.006	0.889	0.907	0.09	0.961	0.968	0.973	0.909	0.936	0.09	0.939	0.945	0.961	0.961	0.982	0.972	1.026	1.12	0.965	0.876	0.874	1.17	0.951	0.966	0.981	0.968	0.992	0.983	1.013	0.969	0.922	0.957	0.883	0.946	0.9	0.991	1.009	0.929	0.957
	1 day, 23:45:09	28.9	0.09	0.943	0.959	0.896	0.929	0.931	0.882	0.902	1.007	0.889	0.907	0.09	0.962	0.969	0.974	0.911	0.937	0.09	0.939	0.946	0.963	0.962	0.982	0.974	1.028	1.121	0.966	0.876	0.874	1.166	0.951	0.966	0.982	0.969	0.993	0.983	1.014	0.969	0.923	0.955	0.885	0.946	0.9	0.988	1.009	0.93	0.957
	1 day, 23:50:09	29	0.09	0.942	0.96	0.897	0.929	0.931	0.882	0.903	1.007	0.89	0.908	0.09	0.961	0.97	0.974	0.911	0.937	0.09	0.939	0.947	0.963	0.963	0.982	0.974	1.029	1.122	0.968	0.874	0.876	1.162	0.952	0.967	0.983	0.97	0.993	0.983	1.015	0.97	0.924	0.956	0.886	0.947	0.901	0.989	1.01	0.931	0.956
	1 day, 23:55:09	28.9	0.09	0.941	0.96	0.897	0.929	0.932	0.884	0.902	1.01	0.892	0.908	0.09	0.962	0.97	0.975	0.91	0.938	0.09	0.939	0.948	0.963	0.963	0.984	0.975	1.029	1.123	0.968	0.875	0.875	1.158	0.952	0.967	0.983	0.971	0.995	0.984	1.015	0.97	0.924	0.957	0.887	0.946	0.9	0.993	1.011	0.931	0.958
	2 days, 0:00:09	28.9	0.09	0.941	0.961	0.898	0.93	0.932	0.885	0.902	1.01	0.889	0.908	0.09	0.962	0.97	0.975	0.911	0.938	0.09	0.94	0.948	0.964	0.964	0.983	0.976	1.03	1.124	0.968	0.875	0.874	1.155	0.953	0.967	0.985	0.973	0.995	0.985	1.015	0.97	0.925	0.957	0.888	0.947	0.901	0.992	1.01	0.93	0.958
Results
		1	2	3	4	5	6	7	8	9	10	11	12
	A	-1.92	13.973	20.06	20.2	20.22	15.48	10.48	8.78	9.46	9.3	11.2	-0.96	Max V [600]
		1	1	1	1	1	1	1	1	1	1	1	1	R-Squared [600]
		00:02:39	05:47:39	06:07:39	05:57:39	06:12:39	06:02:39	07:37:39	06:12:39	06:27:39	05:57:39	06:42:39	00:02:39	t at Max V [600]
		00:00:09	05:28:34	05:55:32	05:43:22	05:56:31	05:47:01	07:22:14	05:39:50	06:02:22	05:31:22	06:28:32	00:00:09	Lagtime [600]
		-0.012	8.39	6.963	8.227	8.843	7.679	5.026	4.643	4.862	5.796	4.604	-0.014	Pf_6n_35h: Max V [600]
		0.84	0.951	0.89	0.904	0.907	0.954	0.947	0.973	0.928	0.978	0.932	0.882	Pf_6n_35h: R-Squared [600]
		03:37:39	05:47:39	06:07:39	05:52:39	06:07:39	06:02:39	07:42:39	05:52:39	06:22:39	06:02:39	06:52:39	06:37:39	Pf_6n_35h: t at Max V [600]
		03:33:29	05:16:59	05:33:30	05:23:12	05:37:29	05:30:09	07:03:20	05:03:34	05:36:53	05:17:46	06:07:14	05:51:29	Pf_6n_35h: Lagtime [600]
		-0.03	11.692	12.13	14.18	15.69	11.13	7.49	6.089	8.03	7.18	6.12	-0.03	Pf_3n_35h: Max V [600]
		0.964	0.987	0.875	0.943	0.973	0.952	0.95	0.982	0.99	0.972	0.813	0.964	Pf_3n_35h: R-Squared [600]
		16:55:09	05:50:09	06:05:09	05:55:09	06:10:09	06:05:09	07:40:09	05:50:09	06:25:09	06:00:09	06:40:09	03:40:09	Pf_3n_35h: t at Max V [600]
		16:07:22	05:25:31	05:47:04	05:37:12	05:51:25	05:41:06	07:15:25	05:15:12	05:56:30	05:25:57	06:14:37	03:34:36	Pf_3n_35h: Lagtime [600]
		-0.006	6.342	5.399	5.91	6.645	5.64	4.338	3.598	4.046	4.372	3.85	-0.007	Pf_9n_35h: Max V [600]
		0.784	0.932	0.909	0.889	0.906	0.922	0.963	0.927	0.949	0.942	0.946	0.612	Pf_9n_35h: R-Squared [600]
		05:45:09	05:45:09	06:10:09	05:55:09	06:05:09	06:00:09	07:45:09	06:05:09	06:30:09	06:05:09	06:50:09	06:30:09	Pf_9n_35h: t at Max V [600]
		04:53:18	05:06:59	05:23:46	05:12:14	05:26:43	05:17:45	06:56:42	04:50:34	05:28:18	05:03:59	05:58:57	05:04:27	Pf_9n_35h: Lagtime [600]
	B	14.74	16.52	14.18	16.52	22.5	-1.32	10.66	12.28	12.48	16.16	15.907	6.28	Max V [600]
		1	1	1	1	1	1	1	1	1	1	1	1	R-Squared [600]
		06:22:39	06:42:39	06:02:39	07:37:39	06:22:39	00:02:39	06:22:39	06:37:39	06:12:39	06:12:39	05:47:39	06:42:39	t at Max V [600]
		06:03:30	06:27:15	05:44:16	07:19:36	06:09:20	00:00:09	06:01:36	06:17:31	05:50:07	05:58:19	05:29:45	06:20:29	Lagtime [600]
		7.47	8.984	8.199	8.658	8.791	-0.017	6.279	6.327	6.954	6.439	6.804	5.227	Pf_6n_35h: Max V [600]
		0.934	0.948	0.952	0.943	0.889	0.936	0.951	0.946	0.931	0.888	0.874	0.99	Pf_6n_35h: R-Squared [600]
		06:17:39	06:42:39	06:02:39	07:32:39	06:22:39	12:32:39	06:22:39	06:37:39	06:12:39	06:12:39	05:42:39	06:52:39	Pf_6n_35h: t at Max V [600]
		05:44:45	06:14:37	05:30:36	07:02:39	05:50:29	10:06:45	05:44:52	05:57:51	05:34:19	05:35:18	05:08:16	06:16:28	Pf_6n_35h: Lagtime [600]
		11.81	13.52	11.92	13.28	16.63	-0.04	9.73	9.09	11.95	11.19	13.393	5.96	Pf_3n_35h: Max V [600]
		0.98	0.984	0.988	0.981	0.96	0.923	0.997	0.961	0.999	0.938	0.988	1	Pf_3n_35h: R-Squared [600]
		06:20:09	06:40:09	06:05:09	07:35:09	06:20:09	06:30:09	06:25:09	06:40:09	06:10:09	06:15:09	05:45:09	07:00:09	Pf_3n_35h: t at Max V [600]
		05:58:21	06:23:23	05:40:48	07:14:35	06:04:02	06:01:49	05:59:28	06:10:03	05:48:47	05:51:37	05:26:12	06:21:49	Pf_3n_35h: Lagtime [600]
		5.143	6.231	6.01	6.407	6.444	-0.013	5.006	5.347	5.628	5	4.864	4.49	Pf_9n_35h: Max V [600]
		0.882	0.887	0.918	0.917	0.881	0.926	0.944	0.962	0.944	0.913	0.869	0.982	Pf_9n_35h: R-Squared [600]
		06:10:09	06:35:09	06:00:09	07:35:09	06:15:09	12:40:09	06:25:09	06:45:09	06:10:09	06:15:09	05:40:09	06:55:09	Pf_9n_35h: t at Max V [600]
		05:28:38	06:01:06	05:19:12	06:52:38	05:37:53	09:22:45	05:35:09	05:51:04	05:25:06	05:24:56	04:53:55	06:10:17	Pf_9n_35h: Lagtime [600]
	C	12.08	10.16	10.64	11.1	6.9	9.3	13.04	12.917	14.42	6.558	10.58	12.2	Max V [600]
		1	1	1	1	1	1	1	1	1	1	1	1	R-Squared [600]
		05:52:39	06:57:39	06:27:39	08:02:39	06:27:39	09:12:39	06:12:39	05:47:39	05:57:39	05:47:39	05:37:39	05:37:39	t at Max V [600]
		05:27:10	06:22:48	06:07:47	07:48:32	05:52:55	07:36:55	05:50:47	05:29:42	05:40:53	05:15:57	05:17:30	05:18:19	Lagtime [600]
		7.09	7.207	5.78	4.832	4.289	8.052	6.352	6.353	6.272	5.399	6.142	5.471	Pf_6n_35h: Max V [600]
		0.958	0.989	0.959	0.921	0.945	0.998	0.905	0.962	0.939	0.993	0.941	0.908	Pf_6n_35h: R-Squared [600]
		05:42:39	06:47:39	06:27:39	08:02:39	06:32:39	09:07:39	06:12:39	05:52:39	05:57:39	05:52:39	05:37:39	05:32:39	Pf_6n_35h: t at Max V [600]
		05:09:11	06:07:50	05:49:02	07:27:18	05:34:20	07:22:21	05:31:26	05:12:17	05:20:13	05:07:48	05:01:19	04:55:04	Pf_6n_35h: Lagtime [600]
		10.022	8.525	8.11	7.94	6.37	8.98	11.81	8.588	9.96	5.98	10.197	9.83	Pf_3n_35h: Max V [600]
		0.986	0.998	0.969	0.95	0.998	1	0.996	0.922	0.937	0.997	1	0.981	Pf_3n_35h: R-Squared [600]
		05:50:09	06:45:09	06:30:09	08:05:09	06:30:09	09:10:09	06:10:09	05:50:09	05:55:09	05:50:09	05:40:09	05:35:09	Pf_3n_35h: t at Max V [600]
		05:21:10	06:13:20	06:01:24	07:42:18	05:51:34	07:33:32	05:48:46	05:21:41	05:33:06	05:12:23	05:16:51	05:13:09	Pf_3n_35h: Lagtime [600]
		5.287	6.036	4.455	4.185	3.514	7.713	4.881	5.164	4.897	4.491	4.762	4.453	Pf_9n_35h: Max V [600]
		0.931	0.973	0.945	0.955	0.952	0.998	0.909	0.958	0.937	0.976	0.932	0.932	Pf_9n_35h: R-Squared [600]
		05:40:09	06:40:09	06:30:09	08:10:09	06:30:09	09:05:09	06:05:09	05:50:09	06:00:09	05:50:09	05:45:09	05:45:09	Pf_9n_35h: t at Max V [600]
		04:57:20	05:59:41	05:37:57	07:22:26	05:21:11	07:17:56	05:18:16	05:03:04	05:10:16	04:58:05	04:51:51	04:47:29	Pf_9n_35h: Lagtime [600]
	D	13.64	9.92	8.5	12.24	11.26	8.58	10.86	10.28	14.74	10.64	12.72	-1.08	Max V [600]
		1	1	1	1	1	1	1	1	1	1	1	1	R-Squared [600]
		05:32:39	06:07:39	08:12:39	06:22:39	06:27:39	06:32:39	08:02:39	06:12:39	06:17:39	06:17:39	06:02:39	00:02:39	t at Max V [600]
		05:13:35	05:42:43	07:42:03	06:01:19	06:03:30	06:06:37	07:48:07	05:52:23	06:04:12	05:53:22	05:44:26	00:00:09	Lagtime [600]
		8.525	6.55	5.539	8.465	5.897	5.466	5.177	4.958	5.359	7.105	6.345	0.012	Pf_6n_35h: Max V [600]
		0.971	0.973	0.979	0.983	0.944	0.957	0.955	0.951	0.905	0.977	0.936	0.922	Pf_6n_35h: R-Squared [600]
		05:32:39	06:02:39	07:52:39	06:22:39	06:22:39	06:32:39	08:12:39	06:22:39	06:17:39	06:17:39	06:02:39	1 day, 5:32:39	Pf_6n_35h: t at Max V [600]
		05:02:12	05:29:20	07:18:35	05:51:17	05:43:32	05:49:35	07:31:56	05:33:52	05:41:13	05:41:55	05:25:31	1 day, 9:52:22	Pf_6n_35h: Lagtime [600]
		11.84	9.03	7.52	11	9.67	8.51	6	7.18	8.43	9.72	10.15	-0.03	Pf_3n_35h: Max V [600]
		0.992	0.997	0.996	0.996	0.991	1	0.821	0.941	0.843	0.997	0.979	0.964	Pf_3n_35h: R-Squared [600]
		05:30:09	06:10:09	07:50:09	06:25:09	06:25:09	06:35:09	08:00:09	06:15:09	06:15:09	06:15:09	06:05:09	09:00:09	Pf_3n_35h: t at Max V [600]
		05:10:18	05:40:37	07:27:10	05:58:59	05:59:47	06:05:46	07:35:04	05:46:24	05:53:55	05:50:57	05:40:01	08:19:02	Pf_3n_35h: Lagtime [600]
		6.621	5.576	4.362	6.344	4.647	4.555	4.241	4.205	4.697	5.399	4.767	-0.009	Pf_9n_35h: Max V [600]
		0.951	0.976	0.953	0.943	0.943	0.963	0.952	0.957	0.953	0.946	0.923	0.831	Pf_9n_35h: R-Squared [600]
		05:30:09	06:05:09	07:55:09	06:20:09	06:20:09	06:30:09	08:10:09	06:20:09	06:25:09	06:15:09	06:00:09	14:30:09	Pf_9n_35h: t at Max V [600]
		04:53:25	05:23:21	07:09:37	05:40:53	05:32:31	05:40:32	07:23:21	05:25:33	05:36:30	05:30:32	05:12:47	11:16:34	Pf_9n_35h: Lagtime [600]
	E	17.78	10.02	12.1	12.84	10	8.88	10.22	7.56	9.6	5.56	12.78	10.18	Max V [600]
		1	1	1	1	1	1	1	1	1	1	1	1	R-Squared [600]
		06:02:39	05:57:39	06:42:39	06:27:39	05:52:39	08:07:39	06:22:39	06:37:39	06:42:39	07:47:39	06:17:39	07:02:39	t at Max V [600]
		05:45:41	05:26:32	06:18:04	06:04:34	05:26:49	07:48:39	06:00:00	06:05:48	06:17:55	07:13:59	06:00:38	06:42:12	Lagtime [600]
		8.039	6.369	7.791	8.295	7.265	4.199	5.425	5.571	5.452	4.797	5.238	5.285	Pf_6n_35h: Max V [600]
		0.888	0.981	0.964	0.962	0.96	0.97	0.949	0.991	0.956	0.996	0.925	0.95	Pf_6n_35h: R-Squared [600]
		05:57:39	05:52:39	06:42:39	06:27:39	05:47:39	08:27:39	06:22:39	06:42:39	06:42:39	07:47:39	06:17:39	07:02:39	Pf_6n_35h: t at Max V [600]
		05:27:50	05:12:01	06:05:47	05:52:54	05:17:24	07:32:09	05:41:02	05:53:22	05:58:19	07:07:26	05:36:11	06:24:05	Pf_6n_35h: Lagtime [600]
		15.52	8.12	11.67	12.21	9.674	6.19	8.44	6.6	8.034	5.32	7.82	8.42	Pf_3n_35h: Max V [600]
		0.993	0.982	1	0.999	1	0.941	0.985	0.999	0.987	0.999	0.882	0.986	Pf_3n_35h: R-Squared [600]
		06:00:09	05:55:09	06:40:09	06:25:09	05:50:09	08:05:09	06:25:09	06:50:09	06:45:09	07:50:09	06:15:09	07:00:09	Pf_3n_35h: t at Max V [600]
		05:43:16	05:21:46	06:16:51	06:03:07	05:26:26	07:39:19	05:56:30	06:02:26	06:12:55	07:12:01	05:49:08	06:37:23	Pf_3n_35h: Lagtime [600]
		6.034	4.927	6.248	6.409	5.666	3.626	4.309	4.774	4.356	4.124	4.32	4.502	Pf_9n_35h: Max V [600]
		0.896	0.954	0.951	0.938	0.949	0.953	0.949	0.985	0.953	0.987	0.946	0.961	Pf_9n_35h: R-Squared [600]
		05:55:09	05:50:09	06:35:09	06:20:09	05:50:09	08:20:09	06:25:09	06:40:09	06:40:09	07:50:09	06:20:09	07:10:09	Pf_9n_35h: t at Max V [600]
		05:17:13	04:59:49	05:56:07	05:41:58	05:08:53	07:22:37	05:30:44	05:44:59	05:46:50	07:00:51	05:27:30	06:17:47	Pf_9n_35h: Lagtime [600]
	F	14.669	15.64	10.98	12.74	6.658	15.66	16.9	11.02	13.3	6.28	8.04	-47.06	Max V [600]
		1	1	1	1	1	1	1	1	1	1	1	1	R-Squared [600]
		05:42:39	05:57:39	05:52:39	1 day, 0:02:39	05:47:39	06:02:39	05:57:39	05:57:39	05:17:39	07:37:39	05:57:39	1 day, 10:32:39	t at Max V [600]
		05:23:39	05:41:20	05:29:43	23:42:32	05:07:39	05:47:40	05:43:09	05:33:35	04:59:35	07:08:16	05:30:45	1 day, 10:50:13	Lagtime [600]
		8.613	9.072	6.452	6.75	4.947	8.709	7.651	6.486	6.327	4.139	4.302	5.533	Pf_6n_35h: Max V [600]
		0.955	0.968	0.947	0.958	0.994	0.925	0.919	0.958	0.952	0.982	0.972	0.594	Pf_6n_35h: R-Squared [600]
		05:42:39	05:57:39	05:47:39	1 day, 0:02:39	05:52:39	06:02:39	05:57:39	05:57:39	05:17:39	07:37:39	06:02:39	1 day, 10:17:39	Pf_6n_35h: t at Max V [600]
		05:11:18	05:29:50	05:14:31	23:23:58	04:58:50	05:34:16	05:25:34	05:19:12	04:41:35	06:57:13	05:07:06	1 day, 7:50:32	Pf_6n_35h: Lagtime [600]
		12.58	12.22	9.33	9.42	5.761	15.05	12.69	9.98	8.87	5.66	5.24	-22.38	Pf_3n_35h: Max V [600]
		0.991	0.975	0.99	0.96	0.992	0.999	0.965	0.996	0.923	0.996	0.913	0.712	Pf_3n_35h: R-Squared [600]
		05:40:09	05:55:09	05:55:09	1 day, 0:00:09	05:50:09	06:05:09	06:00:09	05:55:09	05:15:09	07:35:09	06:00:09	1 day, 10:35:09	Pf_3n_35h: t at Max V [600]
		05:20:35	05:36:35	05:27:00	23:34:26	05:06:16	05:47:02	05:38:48	05:31:19	04:51:20	07:07:13	05:16:33	?????	Pf_3n_35h: Lagtime [600]
		6.408	7.195	5.21	5.158	4.414	6.312	5.635	5.067	4.785	3.826	4.134	3.919	Pf_9n_35h: Max V [600]
		0.922	0.956	0.95	0.936	0.991	0.902	0.906	0.94	0.93	0.99	0.989	0.93	Pf_9n_35h: R-Squared [600]
		05:35:09	06:00:09	05:50:09	23:55:09	05:55:09	06:00:09	06:00:09	05:50:09	05:15:09	07:45:09	06:10:09	06:20:09	Pf_9n_35h: t at Max V [600]
		04:59:39	05:22:52	05:06:22	23:11:14	04:52:36	05:22:55	05:14:55	05:07:46	04:30:08	06:54:07	05:05:02	05:18:37	Pf_9n_35h: Lagtime [600]
	G	13.7	15.56	12.02	17.06	10.86	16.14	12.78	7.8	7.18	12.22	11.98	14.7	Max V [600]
		1	1	1	1	1	1	1	1	1	1	1	1	R-Squared [600]
		05:52:39	07:27:39	06:32:39	06:17:39	05:57:39	05:02:39	05:57:39	05:52:39	05:57:39	06:07:39	05:32:39	05:37:39	t at Max V [600]
		05:34:56	07:12:18	06:14:39	06:05:19	05:33:42	04:48:23	05:35:52	05:10:59	05:29:16	05:47:30	05:15:01	05:23:41	Lagtime [600]
		6.917	5.478	5.575	9.879	7.131	6.553	7.101	6.444	6.241	5.602	4.873	5.504	Pf_6n_35h: Max V [600]
		0.926	0.723	0.921	0.928	0.968	0.934	0.932	0.987	0.984	0.928	0.924	0.871	Pf_6n_35h: R-Squared [600]
		05:47:39	07:27:39	06:32:39	06:17:39	05:57:39	05:07:39	05:52:39	05:47:39	06:07:39	06:02:39	05:32:39	05:32:39	Pf_6n_35h: t at Max V [600]
		05:17:28	06:51:55	05:54:37	05:54:14	05:23:02	04:32:04	05:20:53	05:07:11	05:28:19	05:25:04	04:51:42	04:58:30	Pf_6n_35h: Lagtime [600]
		10.69	13.4	8.8	16.6	10.3	10.1	12.06	7.557	7.11	9.31	7.33	9.869	Pf_3n_35h: Max V [600]
		0.974	0.991	0.957	1	0.999	0.893	0.999	1	1	0.968	0.882	0.926	Pf_3n_35h: R-Squared [600]
		05:55:09	07:25:09	06:35:09	06:20:09	05:55:09	05:00:09	05:55:09	05:50:09	06:00:09	06:05:09	05:30:09	05:40:09	Pf_3n_35h: t at Max V [600]
		05:30:45	07:10:28	06:09:01	06:05:11	05:32:52	04:41:37	05:34:53	05:13:41	05:32:22	05:41:21	05:04:43	05:17:01	Pf_3n_35h: Lagtime [600]
		4.94	4.039	4.207	6.784	5.298	5.147	5.544	5.18	4.893	4.575	4.263	4.422	Pf_9n_35h: Max V [600]
		0.897	0.789	0.919	0.878	0.927	0.931	0.934	0.963	0.959	0.947	0.96	0.915	Pf_9n_35h: R-Squared [600]
		05:45:09	07:25:09	06:35:09	06:15:09	05:50:09	05:10:09	05:55:09	05:50:09	06:10:09	06:10:09	05:40:09	05:40:09	Pf_9n_35h: t at Max V [600]
		05:04:49	06:39:26	05:42:31	05:42:46	05:10:13	04:23:27	05:12:05	04:56:54	05:18:17	05:17:23	04:46:13	04:50:53	Pf_9n_35h: Lagtime [600]
	H	11.34	8.91	16	9.52	15.66	7.9	7.686	15.54	10.58	12.9	-0.22	1.2	Max V [600]
		1	1	1	1	1	1	1	1	1	1	1	1	R-Squared [600]
		18:22:39	06:52:39	06:07:39	06:57:39	06:32:39	07:42:39	06:47:39	06:07:39	06:22:39	06:12:39	00:02:39	01:32:39	t at Max V [600]
		18:03:23	06:27:49	05:51:30	06:23:46	06:15:37	07:16:45	06:18:22	05:54:13	05:58:33	05:55:53	00:00:09	01:37:29	Lagtime [600]
		6.933	4.818	6.99	4.624	6.681	4.337	5.173	5.314	6.382	6.092	-0.014	0.264	Pf_6n_35h: Max V [600]
		0.951	0.963	0.907	0.957	0.902	0.956	0.983	0.888	0.942	0.914	0.686	0.902	Pf_6n_35h: R-Squared [600]
		18:22:39	06:47:39	06:02:39	06:37:39	06:27:39	07:37:39	06:47:39	06:07:39	06:17:39	06:12:39	19:42:39	02:17:39	Pf_6n_35h: t at Max V [600]
		17:48:22	06:09:48	05:31:27	05:46:34	05:53:54	06:56:25	06:02:20	05:29:28	05:43:01	05:36:14	16:47:39	02:08:49	Pf_6n_35h: Lagtime [600]
		10.25	7.062	11.22	6.48	12.08	5.3	6.148	9.26	9.44	10.74	-0.03	0.46	Pf_3n_35h: Max V [600]
		0.996	0.977	0.943	0.941	0.972	0.926	0.98	0.867	0.995	0.987	0.964	0.929	Pf_3n_35h: R-Squared [600]
		18:25:09	06:50:09	06:05:09	06:40:09	06:30:09	07:40:09	06:50:09	06:05:09	06:20:09	06:15:09	19:50:09	02:25:09	Pf_3n_35h: t at Max V [600]
		18:00:57	06:22:47	05:45:01	06:01:35	06:10:26	07:03:33	06:10:16	05:44:32	05:55:53	05:53:00	18:27:56	02:16:06	Pf_3n_35h: Lagtime [600]
		5.143	3.406	5.022	3.906	4.494	3.862	4.218	4.415	4.652	4.696	-0.009	0.181	Pf_9n_35h: Max V [600]
		0.928	0.908	0.888	0.949	0.854	0.976	0.972	0.932	0.916	0.923	0.695	0.856	Pf_9n_35h: R-Squared [600]
		18:25:09	06:40:09	06:00:09	06:40:09	06:25:09	07:45:09	06:50:09	06:15:09	06:25:09	06:15:09	08:40:09	02:20:09	Pf_9n_35h: t at Max V [600]
		17:37:02	05:53:01	05:18:16	05:37:50	05:37:20	06:51:42	05:52:25	05:22:23	05:31:18	05:25:30	06:51:11	02:04:50	Pf_9n_35h: Lagtime [600]
[truncated: 49 more columns]

## Sheet: med_con
Time	B6	D12	H11	Mean	SE
00:00:09	0.105	0.102	0.095	0.100667	0.00296273
00:05:09	0.098	0.096	0.094	0.096	0.0011547
00:10:09	0.098	0.096	0.094	0.096	0.0011547
00:15:09	0.098	0.096	0.093	0.0956667	0.00145297
00:20:09	0.098	0.096	0.093	0.0956667	0.00145297
00:25:09	0.098	0.096	0.094	0.096	0.0011547
00:30:09	0.098	0.096	0.093	0.0956667	0.00145297
00:35:09	0.097	0.096	0.093	0.0953333	0.00120185
00:40:09	0.097	0.096	0.093	0.0953333	0.00120185
00:45:09	0.097	0.096	0.093	0.0953333	0.00120185
00:50:09	0.097	0.096	0.093	0.0953333	0.00120185
00:55:09	0.097	0.096	0.093	0.0953333	0.00120185
01:00:09	0.097	0.096	0.093	0.0953333	0.00120185
01:05:09	0.097	0.096	0.093	0.0953333	0.00120185
01:10:09	0.097	0.096	0.093	0.0953333	0.00120185
01:15:09	0.097	0.096	0.093	0.0953333	0.00120185
01:20:09	0.097	0.096	0.093	0.0953333	0.00120185
01:25:09	0.097	0.096	0.093	0.0953333	0.00120185
01:30:09	0.097	0.096	0.093	0.0953333	0.00120185
01:35:09	0.097	0.096	0.093	0.0953333	0.00120185
01:40:09	0.097	0.096	0.093	0.0953333	0.00120185
01:45:09	0.097	0.096	0.093	0.0953333	0.00120185
01:50:09	0.097	0.096	0.093	0.0953333	0.00120185
01:55:09	0.097	0.096	0.093	0.0953333	0.00120185
02:00:09	0.097	0.096	0.093	0.0953333	0.00120185
02:05:09	0.097	0.096	0.093	0.0953333	0.00120185
02:10:09	0.096	0.096	0.093	0.095	0.001
02:15:09	0.097	0.096	0.093	0.0953333	0.00120185
02:20:09	0.096	0.096	0.093	0.095	0.001
02:25:09	0.096	0.096	0.093	0.095	0.001
02:30:09	0.096	0.096	0.093	0.095	0.001
02:35:09	0.096	0.096	0.093	0.095	0.001
02:40:09	0.096	0.096	0.093	0.095	0.001
02:45:09	0.096	0.096	0.093	0.095	0.001
02:50:09	0.096	0.096	0.093	0.095	0.001
02:55:09	0.096	0.096	0.093	0.095	0.001
03:00:09	0.096	0.096	0.093	0.095	0.001
03:05:09	0.096	0.096	0.093	0.095	0.001
03:10:09	0.096	0.096	0.093	0.095	0.001
03:15:09	0.096	0.096	0.093	0.095	0.001
03:20:09	0.096	0.096	0.093	0.095	0.001
03:25:09	0.096	0.096	0.093	0.095	0.001
03:30:09	0.096	0.096	0.093	0.095	0.001
03:35:09	0.096	0.096	0.093	0.095	0.001
03:40:09	0.096	0.096	0.093	0.095	0.001
03:45:09	0.096	0.096	0.093	0.095	0.001
03:50:09	0.096	0.096	0.093	0.095	0.001
03:55:09	0.096	0.096	0.093	0.095	0.001
04:00:09	0.096	0.096	0.093	0.095	0.001
04:05:09	0.096	0.096	0.093	0.095	0.001
04:10:09	0.096	0.096	0.093	0.095	0.001
04:15:09	0.096	0.096	0.093	0.095	0.001
04:20:09	0.096	0.096	0.093	0.095	0.001
04:25:09	0.096	0.096	0.093	0.095	0.001
04:30:09	0.096	0.096	0.093	0.095	0.001
04:35:09	0.096	0.096	0.093	0.095	0.001
04:40:09	0.096	0.095	0.093	0.0946667	0.000881917
04:45:09	0.096	0.095	0.093	0.0946667	0.000881917
04:50:09	0.096	0.095	0.093	0.0946667	0.000881917
04:55:09	0.096	0.095	0.093	0.0946667	0.000881917
05:00:09	0.096	0.095	0.093	0.0946667	0.000881917
05:05:09	0.096	0.095	0.093	0.0946667	0.000881917
05:10:09	0.096	0.095	0.093	0.0946667	0.000881917
05:15:09	0.096	0.095	0.093	0.0946667	0.000881917
05:20:09	0.096	0.095	0.093	0.0946667	0.000881917
05:25:09	0.096	0.095	0.093	0.0946667	0.000881917
05:30:09	0.096	0.095	0.093	0.0946667	0.000881917
05:35:09	0.096	0.095	0.093	0.0946667	0.000881917
05:40:09	0.096	0.095	0.093	0.0946667	0.000881917
05:45:08	0.096	0.095	0.093	0.0946667	0.000881917
05:50:09	0.096	0.095	0.093	0.0946667	0.000881917
05:55:09	0.096	0.095	0.093	0.0946667	0.000881917
06:00:09	0.095	0.095	0.093	0.0943333	0.000666667
06:05:09	0.095	0.095	0.093	0.0943333	0.000666667
06:10:09	0.096	0.095	0.093	0.0946667	0.000881917
06:15:09	0.095	0.095	0.093	0.0943333	0.000666667
06:20:09	0.095	0.095	0.093	0.0943333	0.000666667
06:25:09	0.096	0.095	0.093	0.0946667	0.000881917
06:30:09	0.095	0.095	0.093	0.0943333	0.000666667
06:35:09	0.095	0.095	0.093	0.0943333	0.000666667
06:40:09	0.095	0.095	0.093	0.0943333	0.000666667
06:45:09	0.095	0.095	0.093	0.0943333	0.000666667
06:50:08	0.095	0.095	0.093	0.0943333	0.000666667
06:55:09	0.095	0.095	0.093	0.0943333	0.000666667
07:00:09	0.095	0.095	0.093	0.0943333	0.000666667
07:05:09	0.095	0.095	0.092	0.094	0.001
07:10:09	0.095	0.095	0.093	0.0943333	0.000666667
07:15:09	0.095	0.095	0.093	0.0943333	0.000666667
07:20:09	0.095	0.095	0.092	0.094	0.001
07:25:09	0.095	0.095	0.092	0.094	0.001
07:30:09	0.095	0.095	0.092	0.094	0.001
07:35:09	0.095	0.095	0.093	0.0943333	0.000666667
07:40:09	0.095	0.095	0.092	0.094	0.001
07:45:09	0.095	0.095	0.092	0.094	0.001
07:50:09	0.095	0.095	0.092	0.094	0.001
07:55:09	0.095	0.095	0.092	0.094	0.001
08:00:09	0.095	0.095	0.092	0.094	0.001
08:05:09	0.095	0.095	0.092	0.094	0.001
08:10:09	0.095	0.095	0.092	0.094	0.001
08:15:09	0.095	0.095	0.092	0.094	0.001
08:20:09	0.095	0.095	0.092	0.094	0.001
08:25:09	0.095	0.095	0.092	0.094	0.001
08:30:09	0.095	0.095	0.092	0.094	0.001
08:35:09	0.095	0.095	0.092	0.094	0.001
08:40:09	0.095	0.095	0.092	0.094	0.001
08:45:09	0.095	0.095	0.092	0.094	0.001
08:50:09	0.095	0.095	0.092	0.094	0.001
08:55:09	0.095	0.095	0.092	0.094	0.001
09:00:09	0.095	0.095	0.092	0.094	0.001
09:05:09	0.095	0.095	0.092	0.094	0.001
09:10:09	0.095	0.095	0.092	0.094	0.001
09:15:09	0.095	0.095	0.092	0.094	0.001
09:20:09	0.095	0.095	0.092	0.094	0.001
09:25:09	0.095	0.095	0.092	0.094	0.001
09:30:09	0.095	0.095	0.092	0.094	0.001
09:35:09	0.095	0.095	0.092	0.094	0.001
09:40:09	0.095	0.095	0.092	0.094	0.001
09:45:09	0.095	0.095	0.092	0.094	0.001
09:50:09	0.095	0.095	0.092	0.094	0.001
09:55:09	0.095	0.095	0.092	0.094	0.001
10:00:09	0.095	0.095	0.092	0.094	0.001
10:05:09	0.095	0.095	0.092	0.094	0.001
10:10:09	0.095	0.095	0.092	0.094	0.001
10:15:09	0.095	0.095	0.092	0.094	0.001
10:20:09	0.095	0.095	0.092	0.094	0.001
10:25:09	0.095	0.095	0.092	0.094	0.001
10:30:09	0.095	0.095	0.092	0.094	0.001
10:35:09	0.094	0.095	0.092	0.0936667	0.000881917
10:40:09	0.095	0.095	0.092	0.094	0.001
10:45:09	0.095	0.095	0.092	0.094	0.001
10:50:09	0.095	0.095	0.092	0.094	0.001
10:55:09	0.095	0.095	0.092	0.094	0.001
11:00:09	0.094	0.095	0.092	0.0936667	0.000881917
11:05:09	0.095	0.095	0.092	0.094	0.001
11:10:09	0.094	0.095	0.092	0.0936667	0.000881917
11:15:09	0.095	0.095	0.092	0.094	0.001
11:20:09	0.095	0.095	0.092	0.094	0.001
11:25:09	0.094	0.095	0.092	0.0936667	0.000881917
11:30:09	0.094	0.095	0.091	0.0933333	0.00120185
11:35:09	0.095	0.095	0.092	0.094	0.001
11:40:09	0.094	0.095	0.092	0.0936667	0.000881917
11:45:09	0.094	0.095	0.092	0.0936667	0.000881917
11:50:09	0.094	0.095	0.092	0.0936667	0.000881917
11:55:09	0.095	0.095	0.092	0.094	0.001
12:00:09	0.094	0.095	0.092	0.0936667	0.000881917
12:05:09	0.094	0.095	0.092	0.0936667	0.000881917
12:10:09	0.094	0.095	0.091	0.0933333	0.00120185
12:15:09	0.094	0.095	0.092	0.0936667	0.000881917
12:20:08	0.094	0.095	0.091	0.0933333	0.00120185
12:25:09	0.094	0.095	0.092	0.0936667	0.000881917
12:30:09	0.094	0.095	0.091	0.0933333	0.00120185
12:35:09	0.094	0.095	0.091	0.0933333	0.00120185
12:40:09	0.094	0.095	0.091	0.0933333	0.00120185
12:45:09	0.094	0.095	0.091	0.0933333	0.00120185
12:50:09	0.094	0.095	0.091	0.0933333	0.00120185
12:55:09	0.094	0.095	0.091	0.0933333	0.00120185
13:00:09	0.094	0.095	0.092	0.0936667	0.000881917
13:05:09	0.094	0.095	0.091	0.0933333	0.00120185
13:10:09	0.094	0.095	0.091	0.0933333	0.00120185
13:15:09	0.094	0.095	0.091	0.0933333	0.00120185
13:20:09	0.094	0.095	0.091	0.0933333	0.00120185
13:25:09	0.094	0.095	0.091	0.0933333	0.00120185
13:30:09	0.094	0.094	0.091	0.093	0.001
13:35:09	0.094	0.095	0.091	0.0933333	0.00120185
13:40:09	0.094	0.094	0.091	0.093	0.001
13:45:09	0.094	0.095	0.091	0.0933333	0.00120185
13:50:09	0.094	0.095	0.091	0.0933333	0.00120185
13:55:09	0.094	0.095	0.091	0.0933333	0.00120185
14:00:09	0.093	0.094	0.091	0.0926667	0.000881917
14:05:09	0.093	0.094	0.091	0.0926667	0.000881917
14:10:09	0.094	0.095	0.091	0.0933333	0.00120185
14:15:09	0.094	0.094	0.091	0.093	0.001
14:20:09	0.093	0.094	0.091	0.0926667	0.000881917
14:25:09	0.094	0.094	0.091	0.093	0.001
14:30:09	0.093	0.094	0.091	0.0926667	0.000881917
14:35:09	0.093	0.094	0.091	0.0926667	0.000881917
14:40:09	0.093	0.094	0.091	0.0926667	0.000881917
14:45:09	0.093	0.094	0.091	0.0926667	0.000881917
14:50:09	0.093	0.094	0.091	0.0926667	0.000881917
14:55:09	0.093	0.094	0.091	0.0926667	0.000881917
15:00:09	0.093	0.094	0.091	0.0926667	0.000881917
15:05:09	0.093	0.094	0.091	0.0926667	0.000881917
15:10:09	0.093	0.094	0.091	0.0926667	0.000881917
15:15:09	0.093	0.094	0.091	0.0926667	0.000881917
15:20:08	0.093	0.094	0.091	0.0926667	0.000881917
15:25:09	0.093	0.094	0.091	0.0926667	0.000881917
15:30:09	0.093	0.094	0.091	0.0926667	0.000881917
15:35:09	0.093	0.094	0.091	0.0926667	0.000881917
15:40:09	0.093	0.094	0.091	0.0926667	0.000881917
15:45:09	0.093	0.094	0.091	0.0926667	0.000881917
15:50:09	0.093	0.094	0.091	0.0926667	0.000881917
15:55:09	0.093	0.094	0.091	0.0926667	0.000881917
16:00:09	0.093	0.094	0.091	0.0926667	0.000881917
16:05:09	0.093	0.094	0.091	0.0926667	0.000881917
16:10:09	0.093	0.094	0.091	0.0926667	0.000881917
16:15:09	0.093	0.094	0.091	0.0926667	0.000881917
16:20:09	0.093	0.094	0.091	0.0926667	0.000881917
16:25:09	0.093	0.094	0.091	0.0926667	0.000881917
16:30:09	0.093	0.094	0.091	0.0926667	0.000881917
16:35:09	0.093	0.094	0.091	0.0926667	0.000881917
16:40:09	0.093	0.094	0.091	0.0926667	0.000881917
16:45:09	0.093	0.094	0.091	0.0926667	0.000881917
16:50:09	0.093	0.094	0.091	0.0926667	0.000881917
16:55:09	0.093	0.094	0.091	0.0926667	0.000881917
17:00:09	0.093	0.094	0.091	0.0926667	0.000881917
17:05:09	0.093	0.094	0.091	0.0926667	0.000881917
17:10:09	0.093	0.094	0.091	0.0926667	0.000881917
17:15:09	0.093	0.094	0.091	0.0926667	0.000881917
17:20:09	0.093	0.094	0.091	0.0926667	0.000881917
17:25:09	0.093	0.094	0.091	0.0926667	0.000881917
17:30:09	0.093	0.094	0.091	0.0926667	0.000881917
17:35:09	0.093	0.094	0.091	0.0926667	0.000881917
17:40:09	0.093	0.094	0.091	0.0926667	0.000881917
17:45:09	0.093	0.094	0.091	0.0926667	0.000881917
17:50:09	0.093	0.094	0.091	0.0926667	0.000881917
17:55:09	0.093	0.094	0.091	0.0926667	0.000881917
18:00:09	0.093	0.094	0.091	0.0926667	0.000881917
18:05:09	0.093	0.094	0.091	0.0926667	0.000881917
18:10:09	0.093	0.094	0.091	0.0926667	0.000881917
18:15:09	0.093	0.094	0.091	0.0926667	0.000881917
18:20:09	0.093	0.094	0.091	0.0926667	0.000881917
18:25:09	0.093	0.094	0.091	0.0926667	0.000881917
18:30:09	0.093	0.094	0.091	0.0926667	0.000881917
18:35:09	0.093	0.094	0.091	0.0926667	0.000881917
18:40:09	0.093	0.094	0.091	0.0926667	0.000881917
18:45:09	0.093	0.094	0.091	0.0926667	0.000881917
18:50:09	0.093	0.094	0.091	0.0926667	0.000881917
18:55:09	0.093	0.094	0.091	0.0926667	0.000881917
19:00:09	0.093	0.094	0.091	0.0926667	0.000881917
19:05:09	0.093	0.094	0.091	0.0926667	0.000881917
19:10:09	0.093	0.094	0.091	0.0926667	0.000881917
19:15:09	0.093	0.094	0.091	0.0926667	0.000881917
19:20:09	0.093	0.094	0.091	0.0926667	0.000881917
19:25:09	0.093	0.094	0.091	0.0926667	0.000881917
19:30:09	0.093	0.094	0.091	0.0926667	0.000881917
19:35:09	0.093	0.094	0.091	0.0926667	0.000881917
19:40:09	0.092	0.094	0.091	0.0923333	0.000881917
19:45:09	0.093	0.094	0.091	0.0926667	0.000881917
19:50:09	0.092	0.094	0.091	0.0923333	0.000881917
19:55:09	0.093	0.094	0.09	0.0923333	0.00120185
20:00:09	0.092	0.094	0.091	0.0923333	0.000881917
20:05:09	0.092	0.094	0.091	0.0923333	0.000881917
20:10:09	0.093	0.094	0.09	0.0923333	0.00120185
20:15:09	0.092	0.094	0.091	0.0923333	0.000881917
20:20:09	0.092	0.094	0.09	0.092	0.0011547
20:25:09	0.092	0.094	0.09	0.092	0.0011547
20:30:09	0.092	0.094	0.09	0.092	0.0011547
20:35:09	0.092	0.094	0.09	0.092	0.0011547
20:40:09	0.092	0.094	0.09	0.092	0.0011547
20:45:09	0.092	0.094	0.09	0.092	0.0011547
20:50:09	0.092	0.094	0.09	0.092	0.0011547
20:55:09	0.092	0.094	0.09	0.092	0.0011547
21:00:09	0.092	0.094	0.09	0.092	0.0011547
21:05:09	0.092	0.094	0.09	0.092	0.0011547
21:10:09	0.092	0.094	0.09	0.092	0.0011547
21:15:09	0.092	0.094	0.09	0.092	0.0011547
21:20:09	0.092	0.093	0.09	0.0916667	0.000881917
21:25:09	0.092	0.094	0.09	0.092	0.0011547
21:30:09	0.092	0.094	0.09	0.092	0.0011547
21:35:09	0.092	0.093	0.09	0.0916667	0.000881917
21:40:09	0.092	0.094	0.09	0.092	0.0011547
21:45:09	0.092	0.094	0.09	0.092	0.0011547
21:50:09	0.092	0.094	0.09	0.092	0.0011547
21:55:09	0.092	0.094	0.09	0.092	0.0011547
22:00:09	0.092	0.094	0.09	0.092	0.0011547
22:05:09	0.092	0.093	0.09	0.0916667	0.000881917
22:10:09	0.092	0.093	0.09	0.0916667	0.000881917
22:15:09	0.092	0.093	0.09	0.0916667	0.000881917
22:20:09	0.092	0.093	0.09	0.0916667	0.000881917
22:25:09	0.092	0.093	0.09	0.0916667	0.000881917
22:30:09	0.092	0.093	0.09	0.0916667	0.000881917
22:35:09	0.092	0.093	0.09	0.0916667	0.000881917
22:40:09	0.092	0.093	0.09	0.0916667	0.000881917
22:45:09	0.092	0.093	0.09	0.0916667	0.000881917
22:50:09	0.092	0.093	0.09	0.0916667	0.000881917
22:55:09	0.092	0.093	0.09	0.0916667	0.000881917
23:00:09	0.092	0.093	0.09	0.0916667	0.000881917
23:05:09	0.092	0.093	0.09	0.0916667	0.000881917
23:10:09	0.092	0.093	0.09	0.0916667	0.000881917
23:15:09	0.092	0.093	0.09	0.0916667	0.000881917
23:20:09	0.092	0.093	0.09	0.0916667	0.000881917
23:25:09	0.092	0.093	0.09	0.0916667	0.000881917
23:30:09	0.092	0.093	0.09	0.0916667	0.000881917
23:35:09	0.092	0.093	0.09	0.0916667	0.000881917
23:40:09	0.092	0.093	0.09	0.0916667	0.000881917
23:45:09	0.092	0.093	0.09	0.0916667	0.000881917
23:50:09	0.092	0.093	0.09	0.0916667	0.000881917
23:55:09	0.092	0.093	0.09	0.0916667	0.000881917
1 day, 0:00:09	0.092	0.093	0.09	0.0916667	0.000881917
1 day, 0:05:09	0.092	0.093	0.09	0.0916667	0.000881917
1 day, 0:10:09	0.092	0.093	0.09	0.0916667	0.000881917
1 day, 0:15:09	0.092	0.093	0.09	0.0916667	0.000881917
1 day, 0:20:09	0.092	0.093	0.09	0.0916667	0.000881917
1 day, 0:25:09	0.092	0.093	0.09	0.0916667	0.000881917
1 day, 0:30:09	0.092	0.093	0.09	0.0916667	0.000881917
1 day, 0:35:09	0.092	0.093	0.09	0.0916667	0.000881917
1 day, 0:40:09	0.092	0.093	0.09	0.0916667	0.000881917
1 day, 0:45:09	0.092	0.093	0.09	0.0916667	0.000881917
1 day, 0:50:09	0.092	0.093	0.09	0.0916667	0.000881917
1 day, 0:55:09	0.092	0.093	0.09	0.0916667	0.000881917
1 day, 1:00:09	0.092	0.093	0.09	0.0916667	0.000881917
1 day, 1:05:09	0.092	0.093	0.09	0.0916667	0.000881917
1 day, 1:10:09	0.092	0.093	0.09	0.0916667	0.000881917
1 day, 1:15:09	0.091	0.093	0.09	0.0913333	0.000881917
1 day, 1:20:09	0.091	0.093	0.09	0.0913333	0.000881917
1 day, 1:25:09	0.092	0.093	0.09	0.0916667	0.000881917
1 day, 1:30:09	0.091	0.093	0.09	0.0913333	0.000881917
1 day, 1:35:09	0.091	0.093	0.09	0.0913333	0.000881917
1 day, 1:40:09	0.091	0.093	0.09	0.0913333	0.000881917
1 day, 1:45:09	0.091	0.093	0.09	0.0913333	0.000881917
1 day, 1:50:09	0.091	0.093	0.09	0.0913333	0.000881917
1 day, 1:55:09	0.091	0.093	0.09	0.0913333	0.000881917
1 day, 2:00:09	0.091	0.093	0.09	0.0913333	0.000881917
1 day, 2:05:09	0.091	0.093	0.09	0.0913333	0.000881917
1 day, 2:10:09	0.091	0.093	0.09	0.0913333	0.000881917
1 day, 2:15:09	0.091	0.093	0.09	0.0913333	0.000881917
1 day, 2:20:09	0.091	0.093	0.09	0.0913333	0.000881917
1 day, 2:25:09	0.091	0.093	0.09	0.0913333	0.000881917
1 day, 2:30:09	0.091	0.093	0.09	0.0913333	0.000881917
1 day, 2:35:09	0.091	0.093	0.09	0.0913333	0.000881917
1 day, 2:40:09	0.091	0.093	0.09	0.0913333	0.000881917
1 day, 2:45:09	0.091	0.093	0.09	0.0913333	0.000881917
1 day, 2:50:09	0.091	0.093	0.09	0.0913333	0.000881917
1 day, 2:55:09	0.091	0.093	0.09	0.0913333	0.000881917
1 day, 3:00:09	0.091	0.093	0.09	0.0913333	0.000881917
1 day, 3:05:09	0.091	0.093	0.09	0.0913333	0.000881917
1 day, 3:10:09	0.091	0.093	0.09	0.0913333	0.000881917
1 day, 3:15:09	0.091	0.093	0.09	0.0913333	0.000881917
1 day, 3:20:09	0.091	0.093	0.09	0.0913333	0.000881917
1 day, 3:25:09	0.091	0.093	0.09	0.0913333	0.000881917
1 day, 3:30:09	0.091	0.093	0.09	0.0913333	0.000881917
1 day, 3:35:09	0.091	0.093	0.09	0.0913333	0.000881917
1 day, 3:40:09	0.091	0.093	0.09	0.0913333	0.000881917
1 day, 3:45:09	0.091	0.093	0.09	0.0913333	0.000881917
1 day, 3:50:09	0.091	0.093	0.09	0.0913333	0.000881917
1 day, 3:55:09	0.091	0.093	0.09	0.0913333	0.000881917
1 day, 4:00:09	0.091	0.093	0.09	0.0913333	0.000881917
1 day, 4:05:09	0.091	0.093	0.09	0.0913333	0.000881917
1 day, 4:10:09	0.091	0.093	0.09	0.0913333	0.000881917
1 day, 4:15:09	0.091	0.093	0.09	0.0913333	0.000881917
1 day, 4:20:09	0.091	0.093	0.09	0.0913333	0.000881917
1 day, 4:25:09	0.091	0.093	0.09	0.0913333	0.000881917
1 day, 4:30:09	0.091	0.093	0.09	0.0913333	0.000881917
1 day, 4:35:09	0.091	0.093	0.09	0.0913333	0.000881917
1 day, 4:40:09	0.091	0.093	0.09	0.0913333	0.000881917
1 day, 4:45:09	0.091	0.093	0.09	0.0913333	0.000881917
1 day, 4:50:09	0.091	0.093	0.09	0.0913333	0.000881917
1 day, 4:55:09	0.091	0.093	0.09	0.0913333	0.000881917
1 day, 5:00:09	0.091	0.093	0.09	0.0913333	0.000881917
1 day, 5:05:09	0.091	0.093	0.09	0.0913333	0.000881917
1 day, 5:10:08	0.091	0.093	0.09	0.0913333	0.000881917
1 day, 5:15:09	0.091	0.093	0.09	0.0913333	0.000881917
1 day, 5:20:09	0.091	0.093	0.09	0.0913333	0.000881917
1 day, 5:25:09	0.091	0.093	0.09	0.0913333	0.000881917
1 day, 5:30:09	0.091	0.093	0.09	0.0913333	0.000881917
1 day, 5:35:09	0.091	0.093	0.09	0.0913333	0.000881917
1 day, 5:40:09	0.091	0.093	0.09	0.0913333	0.000881917
1 day, 5:45:09	0.091	0.093	0.09	0.0913333	0.000881917
1 day, 5:50:09	0.091	0.093	0.09	0.0913333	0.000881917
1 day, 5:55:09	0.091	0.093	0.09	0.0913333	0.000881917
1 day, 6:00:09	0.091	0.093	0.09	0.0913333	0.000881917
1 day, 6:05:09	0.091	0.093	0.09	0.0913333	0.000881917
1 day, 6:10:09	0.091	0.093	0.09	0.0913333	0.000881917
1 day, 6:15:09	0.091	0.093	0.09	0.0913333	0.000881917
1 day, 6:20:09	0.091	0.093	0.09	0.0913333	0.000881917
1 day, 6:25:09	0.091	0.093	0.09	0.0913333	0.000881917
1 day, 6:30:09	0.091	0.093	0.09	0.0913333	0.000881917
1 day, 6:35:09	0.091	0.093	0.09	0.0913333	0.000881917
1 day, 6:40:09	0.091	0.093	0.09	0.0913333	0.000881917
1 day, 6:45:09	0.091	0.093	0.09	0.0913333	0.000881917
1 day, 6:50:09	0.091	0.093	0.09	0.0913333	0.000881917
1 day, 6:55:09	0.091	0.093	0.09	0.0913333	0.000881917
1 day, 7:00:09	0.091	0.093	0.09	0.0913333	0.000881917
1 day, 7:05:09	0.091	0.093	0.09	0.0913333	0.000881917
1 day, 7:10:09	0.091	0.093	0.09	0.0913333	0.000881917
1 day, 7:15:09	0.091	0.093	0.09	0.0913333	0.000881917
1 day, 7:20:09	0.091	0.093	0.09	0.0913333	0.000881917
1 day, 7:25:09	0.091	0.093	0.09	0.0913333	0.000881917
1 day, 7:30:09	0.091	0.093	0.09	0.0913333	0.000881917
1 day, 7:35:09	0.091	0.093	0.09	0.0913333	0.000881917
1 day, 7:40:09	0.091	0.093	0.09	0.0913333	0.000881917
1 day, 7:45:09	0.091	0.093	0.09	0.0913333	0.000881917
1 day, 7:50:09	0.091	0.093	0.09	0.0913333	0.000881917
1 day, 7:55:09	0.091	0.093	0.09	0.0913333	0.000881917
1 day, 8:00:09	0.091	0.093	0.09	0.0913333	0.000881917
1 day, 8:05:09	0.091	0.093	0.09	0.0913333	0.000881917
1 day, 8:10:09	0.091	0.093	0.09	0.0913333	0.000881917
1 day, 8:15:09	0.091	0.093	0.09	0.0913333	0.000881917
1 day, 8:20:09	0.091	0.093	0.09	0.0913333	0.000881917
1 day, 8:25:09	0.091	0.093	0.09	0.0913333	0.000881917
1 day, 8:30:09	0.091	0.093	0.09	0.0913333	0.000881917
1 day, 8:35:09	0.091	0.093	0.09	0.0913333	0.000881917
1 day, 8:40:09	0.091	0.093	0.09	0.0913333	0.000881917
1 day, 8:45:09	0.091	0.093	0.09	0.0913333	0.000881917
1 day, 8:50:09	0.091	0.093	0.09	0.0913333	0.000881917
1 day, 8:55:09	0.091	0.093	0.09	0.0913333	0.000881917
1 day, 9:00:09	0.091	0.093	0.09	0.0913333	0.000881917
1 day, 9:05:09	0.091	0.093	0.09	0.0913333	0.000881917
1 day, 9:10:09	0.091	0.093	0.09	0.0913333	0.000881917
1 day, 9:15:09	0.091	0.093	0.09	0.0913333	0.000881917
1 day, 9:20:09	0.091	0.093	0.09	0.0913333	0.000881917
1 day, 9:25:09	0.091	0.092	0.09	0.091	0.00057735
1 day, 9:30:09	0.091	0.093	0.09	0.0913333	0.000881917
1 day, 9:35:09	0.091	0.093	0.09	0.0913333	0.000881917
1 day, 9:40:09	0.091	0.093	0.09	0.0913333	0.000881917
1 day, 9:45:09	0.09	0.092	0.09	0.0906667	0.000666667
1 day, 9:50:09	0.091	0.093	0.09	0.0913333	0.000881917
1 day, 9:55:09	0.091	0.092	0.09	0.091	0.00057735
1 day, 10:00:09	0.09	0.093	0.09	0.091	0.001
1 day, 10:05:09	0.091	0.092	0.09	0.091	0.00057735
1 day, 10:10:09	0.091	0.092	0.09	0.091	0.00057735
1 day, 10:15:09	0.091	0.092	0.09	0.091	0.00057735
1 day, 10:20:09	0.091	0.092	0.09	0.091	0.00057735
1 day, 10:25:09	0.091	0.093	0.09	0.0913333	0.000881917
1 day, 10:30:09	0.091	0.093	0.09	0.0913333	0.000881917
1 day, 10:35:09	0.09	0.093	0.09	0.091	0.001
1 day, 10:40:09	0.091	0.092	0.09	0.091	0.00057735
1 day, 10:45:09	0.091	0.093	0.09	0.0913333	0.000881917
1 day, 10:50:09	0.091	0.092	0.09	0.091	0.00057735
1 day, 10:55:09	0.09	0.092	0.09	0.0906667	0.000666667
1 day, 11:00:09	0.09	0.092	0.09	0.0906667	0.000666667
1 day, 11:05:09	0.09	0.092	0.09	0.0906667	0.000666667
1 day, 11:10:09	0.091	0.092	0.09	0.091	0.00057735
1 day, 11:15:09	0.09	0.092	0.09	0.0906667	0.000666667
1 day, 11:20:09	0.09	0.092	0.09	0.0906667	0.000666667
1 day, 11:25:09	0.09	0.092	0.09	0.0906667	0.000666667
1 day, 11:30:09	0.091	0.092	0.09	0.091	0.00057735
1 day, 11:35:09	0.09	0.092	0.09	0.0906667	0.000666667
1 day, 11:40:09	0.09	0.092	0.09	0.0906667	0.000666667
1 day, 11:45:09	0.091	0.092	0.09	0.091	0.00057735
1 day, 11:50:09	0.09	0.092	0.09	0.0906667	0.000666667
1 day, 11:55:09	0.09	0.092	0.09	0.0906667	0.000666667
1 day, 12:00:09	0.09	0.092	0.09	0.0906667	0.000666667
1 day, 12:05:09	0.09	0.092	0.09	0.0906667	0.000666667
1 day, 12:10:09	0.09	0.092	0.09	0.0906667	0.000666667
1 day, 12:15:09	0.09	0.092	0.09	0.0906667	0.000666667
1 day, 12:20:09	0.09	0.092	0.09	0.0906667	0.000666667
1 day, 12:25:09	0.09	0.092	0.09	0.0906667	0.000666667
1 day, 12:30:09	0.09	0.092	0.09	0.0906667	0.000666667
1 day, 12:35:09	0.09	0.092	0.09	0.0906667	0.000666667
1 day, 12:40:09	0.09	0.092	0.09	0.0906667	0.000666667
1 day, 12:45:09	0.09	0.092	0.09	0.0906667	0.000666667
1 day, 12:50:09	0.09	0.092	0.09	0.0906667	0.000666667
1 day, 12:55:09	0.09	0.092	0.09	0.0906667	0.000666667
1 day, 13:00:09	0.09	0.092	0.09	0.0906667	0.000666667
1 day, 13:05:09	0.09	0.092	0.09	0.0906667	0.000666667
1 day, 13:10:09	0.09	0.092	0.089	0.0903333	0.000881917
1 day, 13:15:09	0.09	0.092	0.09	0.0906667	0.000666667
1 day, 13:20:09	0.091	0.092	0.09	0.091	0.00057735
1 day, 13:25:09	0.09	0.092	0.09	0.0906667	0.000666667
1 day, 13:30:09	0.09	0.092	0.09	0.0906667	0.000666667
1 day, 13:35:09	0.09	0.092	0.09	0.0906667	0.000666667
1 day, 13:40:09	0.09	0.092	0.09	0.0906667	0.000666667
1 day, 13:45:09	0.09	0.092	0.09	0.0906667	0.000666667
1 day, 13:50:09	0.09	0.092	0.09	0.0906667	0.000666667
1 day, 13:55:09	0.09	0.092	0.089	0.0903333	0.000881917
1 day, 14:00:09	0.09	0.092	0.089	0.0903333	0.000881917
1 day, 14:05:09	0.09	0.092	0.09	0.0906667	0.000666667
1 day, 14:10:09	0.09	0.092	0.09	0.0906667	0.000666667
1 day, 14:15:09	0.09	0.092	0.089	0.0903333	0.000881917
1 day, 14:20:09	0.09	0.092	0.09	0.0906667	0.000666667
1 day, 14:25:09	0.09	0.092	0.09	0.0906667	0.000666667
1 day, 14:30:09	0.09	0.092	0.089	0.0903333	0.000881917
1 day, 14:35:09	0.09	0.092	0.09	0.0906667	0.000666667
1 day, 14:40:09	0.09	0.092	0.09	0.0906667	0.000666667
1 day, 14:45:09	0.09	0.092	0.09	0.0906667	0.000666667
1 day, 14:50:09	0.09	0.092	0.089	0.0903333	0.000881917
1 day, 14:55:09	0.09	0.092	0.09	0.0906667	0.000666667
1 day, 15:00:09	0.09	0.092	0.089	0.0903333	0.000881917
1 day, 15:05:09	0.09	0.092	0.089	0.0903333	0.000881917
1 day, 15:10:09	0.09	0.092	0.09	0.0906667	0.000666667
1 day, 15:15:09	0.09	0.092	0.09	0.0906667	0.000666667
1 day, 15:20:09	0.09	0.092	0.09	0.0906667	0.000666667
1 day, 15:25:09	0.09	0.092	0.09	0.0906667	0.000666667
1 day, 15:30:09	0.09	0.092	0.09	0.0906667	0.000666667
1 day, 15:35:09	0.09	0.092	0.09	0.0906667	0.000666667
1 day, 15:40:09	0.09	0.092	0.09	0.0906667	0.000666667
1 day, 15:45:09	0.09	0.092	0.089	0.0903333	0.000881917
1 day, 15:50:09	0.09	0.092	0.09	0.0906667	0.000666667
1 day, 15:55:09	0.09	0.092	0.09	0.0906667	0.000666667
1 day, 16:00:09	0.09	0.092	0.089	0.0903333	0.000881917
1 day, 16:05:09	0.09	0.092	0.09	0.0906667	0.000666667
1 day, 16:10:09	0.09	0.092	0.089	0.0903333	0.000881917
1 day, 16:15:09	0.09	0.092	0.09	0.0906667	0.000666667
1 day, 16:20:09	0.09	0.092	0.09	0.0906667	0.000666667
1 day, 16:25:09	0.09	0.092	0.089	0.0903333	0.000881917
1 day, 16:30:09	0.09	0.092	0.089	0.0903333	0.000881917
1 day, 16:35:09	0.09	0.092	0.09	0.0906667	0.000666667
1 day, 16:40:09	0.09	0.092	0.09	0.0906667	0.000666667
1 day, 16:45:09	0.09	0.092	0.089	0.0903333	0.000881917
1 day, 16:50:09	0.09	0.092	0.089	0.0903333	0.000881917
1 day, 16:55:09	0.09	0.092	0.09	0.0906667	0.000666667
1 day, 17:00:09	0.09	0.092	0.089	0.0903333	0.000881917
1 day, 17:05:09	0.09	0.092	0.089	0.0903333	0.000881917
1 day, 17:10:09	0.09	0.092	0.09	0.0906667	0.000666667
1 day, 17:15:09	0.09	0.092	0.089	0.0903333	0.000881917
1 day, 17:20:09	0.09	0.092	0.09	0.0906667	0.000666667
1 day, 17:25:09	0.09	0.092	0.089	0.0903333	0.000881917
1 day, 17:30:09	0.09	0.092	0.09	0.0906667	0.000666667
1 day, 17:35:09	0.09	0.092	0.089	0.0903333	0.000881917
1 day, 17:40:09	0.09	0.092	0.089	0.0903333	0.000881917
1 day, 17:45:09	0.09	0.092	0.089	0.0903333	0.000881917
1 day, 17:50:09	0.09	0.092	0.09	0.0906667	0.000666667
1 day, 17:55:09	0.09	0.092	0.09	0.0906667	0.000666667
1 day, 18:00:09	0.09	0.091	0.089	0.09	0.00057735
1 day, 18:05:09	0.09	0.092	0.089	0.0903333	0.000881917
1 day, 18:10:09	0.09	0.092	0.089	0.0903333	0.000881917
1 day, 18:15:09	0.09	0.092	0.09	0.0906667	0.000666667
1 day, 18:20:09	0.09	0.092	0.089	0.0903333	0.000881917
1 day, 18:25:09	0.09	0.091	0.089	0.09	0.00057735
1 day, 18:30:09	0.09	0.092	0.089	0.0903333	0.000881917
1 day, 18:35:09	0.09	0.092	0.089	0.0903333	0.000881917
1 day, 18:40:09	0.09	0.092	0.09	0.0906667	0.000666667
1 day, 18:45:09	0.09	0.092	0.09	0.0906667	0.000666667
1 day, 18:50:09	0.09	0.092	0.09	0.0906667	0.000666667
1 day, 18:55:09	0.09	0.092	0.089	0.0903333	0.000881917
1 day, 19:00:09	0.09	0.092	0.09	0.0906667	0.000666667
1 day, 19:05:09	0.09	0.092	0.09	0.0906667	0.000666667
1 day, 19:10:09	0.09	0.092	0.089	0.0903333	0.000881917
1 day, 19:15:09	0.09	0.092	0.089	0.0903333	0.000881917
1 day, 19:20:09	0.09	0.092	0.089	0.0903333	0.000881917
1 day, 19:25:09	0.09	0.092	0.09	0.0906667	0.000666667
1 day, 19:30:09	0.09	0.092	0.089	0.0903333	0.000881917
1 day, 19:35:09	0.09	0.092	0.089	0.0903333	0.000881917
1 day, 19:40:09	0.09	0.092	0.089	0.0903333	0.000881917
1 day, 19:45:09	0.09	0.091	0.089	0.09	0.00057735
1 day, 19:50:09	0.09	0.092	0.09	0.0906667	0.000666667
1 day, 19:55:09	0.09	0.092	0.089	0.0903333	0.000881917
1 day, 20:00:09	0.09	0.092	0.09	0.0906667	0.000666667
1 day, 20:05:09	0.09	0.092	0.089	0.0903333	0.000881917
1 day, 20:10:09	0.09	0.092	0.09	0.0906667	0.000666667
1 day, 20:15:09	0.09	0.092	0.089	0.0903333	0.000881917
1 day, 20:20:09	0.09	0.092	0.09	0.0906667	0.000666667
1 day, 20:25:09	0.09	0.092	0.089	0.0903333	0.000881917
1 day, 20:30:09	0.09	0.091	0.089	0.09	0.00057735
1 day, 20:35:09	0.09	0.092	0.089	0.0903333	0.000881917
1 day, 20:40:09	0.09	0.092	0.089	0.0903333	0.000881917
1 day, 20:45:09	0.09	0.092	0.09	0.0906667	0.000666667
1 day, 20:50:09	0.09	0.092	0.089	0.0903333	0.000881917
1 day, 20:55:09	0.09	0.091	0.089	0.09	0.00057735
1 day, 21:00:09	0.09	0.091	0.089	0.09	0.00057735
1 day, 21:05:09	0.09	0.092	0.09	0.0906667	0.000666667
1 day, 21:10:09	0.09	0.092	0.09	0.0906667	0.000666667
1 day, 21:15:09	0.09	0.092	0.089	0.0903333	0.000881917
1 day, 21:20:09	0.09	0.092	0.089	0.0903333	0.000881917
1 day, 21:25:09	0.09	0.091	0.089	0.09	0.00057735
1 day, 21:30:09	0.09	0.092	0.089	0.0903333	0.000881917
1 day, 21:35:09	0.09	0.091	0.089	0.09	0.00057735
1 day, 21:40:09	0.09	0.092	0.089	0.0903333	0.000881917
1 day, 21:45:09	0.09	0.091	0.089	0.09	0.00057735
1 day, 21:50:09	0.09	0.092	0.089	0.0903333	0.000881917
1 day, 21:55:09	0.09	0.092	0.089	0.0903333	0.000881917
1 day, 22:00:09	0.09	0.092	0.089	0.0903333	0.000881917
1 day, 22:05:09	0.09	0.091	0.089	0.09	0.00057735
1 day, 22:10:09	0.09	0.092	0.09	0.0906667	0.000666667
1 day, 22:15:09	0.09	0.092	0.089	0.0903333	0.000881917
1 day, 22:20:09	0.09	0.091	0.089	0.09	0.00057735
1 day, 22:25:09	0.09	0.092	0.089	0.0903333	0.000881917
1 day, 22:30:09	0.09	0.091	0.089	0.09	0.00057735
1 day, 22:35:09	0.09	0.091	0.089	0.09	0.00057735
1 day, 22:40:09	0.09	0.091	0.089	0.09	0.00057735
1 day, 22:45:09	0.09	0.092	0.089	0.0903333	0.000881917
1 day, 22:50:09	0.09	0.091	0.089	0.09	0.00057735
1 day, 22:55:09	0.09	0.091	0.089	0.09	0.00057735
1 day, 23:00:08	0.09	0.092	0.09	0.0906667	0.000666667
1 day, 23:05:09	0.09	0.091	0.09	0.0903333	0.000333333
1 day, 23:10:09	0.09	0.091	0.089	0.09	0.00057735
1 day, 23:15:09	0.09	0.091	0.09	0.0903333	0.000333333
1 day, 23:20:09	0.09	0.091	0.089	0.09	0.00057735
1 day, 23:25:09	0.09	0.092	0.089	0.0903333	0.000881917
1 day, 23:30:09	0.09	0.091	0.089	0.09	0.00057735
1 day, 23:35:09	0.09	0.092	0.089	0.0903333	0.000881917
1 day, 23:40:09	0.09	0.092	0.089	0.0903333	0.000881917
1 day, 23:45:09	0.09	0.092	0.09	0.0906667	0.000666667
1 day, 23:50:09	0.09	0.092	0.089	0.0903333	0.000881917
1 day, 23:55:09	0.09	0.092	0.09	0.0906667	0.000666667
2 days, 0:00:09	0.09	0.091	0.089	0.09	0.00057735

## Sheet: SBW25
Time	A2	B7	C10	E1	F5	G8		raw data - medium control mean	A2	B7	C10	E1	F5	G8	mean	se
00:00:09	0.118	0.11	0.122	0.122	0.127	0.132			0.0173333	0.00933333	0.0213333	0.0213333	0.0263333	0.0313333	0.0211667	0.00308131
00:05:09	0.11	0.11	0.113	0.114	0.122	0.13			0.014	0.014	0.017	0.018	0.026	0.034	0.0205	0.00324294
00:10:09	0.11	0.11	0.113	0.113	0.123	0.132			0.014	0.014	0.017	0.017	0.027	0.036	0.0208333	0.0036094
00:15:09	0.109	0.11	0.116	0.113	0.125	0.132			0.0133333	0.0143333	0.0203333	0.0173333	0.0293333	0.0363333	0.0218333	0.0037305
00:20:09	0.11	0.109	0.115	0.114	0.122	0.158			0.0143333	0.0133333	0.0193333	0.0183333	0.0263333	0.0623333	0.0256667	0.00757041
00:25:09	0.11	0.108	0.118	0.114	0.123	0.132			0.014	0.012	0.022	0.018	0.027	0.036	0.0215	0.0036492
00:30:09	0.11	0.108	0.113	0.114	0.124	0.13			0.0143333	0.0123333	0.0173333	0.0183333	0.0283333	0.0343333	0.0208333	0.003519
00:35:09	0.109	0.107	0.122	0.113	0.124	0.131			0.0136667	0.0116667	0.0266667	0.0176667	0.0286667	0.0356667	0.0223333	0.00386149
00:40:09	0.108	0.107	0.119	0.113	0.124	0.131			0.0126667	0.0116667	0.0236667	0.0176667	0.0286667	0.0356667	0.0216667	0.00385573												48h
00:45:09	0.108	0.106	0.116	0.112	0.125	0.132			0.0126667	0.0106667	0.0206667	0.0166667	0.0296667	0.0366667	0.0211667	0.00414528
00:50:09	0.108	0.106	0.113	0.112	0.126	0.133			0.0126667	0.0106667	0.0176667	0.0166667	0.0306667	0.0376667	0.021	0.00438685
00:55:09	0.108	0.106	0.112	0.112	0.126	0.134			0.0126667	0.0106667	0.0166667	0.0166667	0.0306667	0.0386667	0.021	0.00454362
01:00:09	0.108	0.105	0.112	0.112	0.127	0.135			0.0126667	0.00966667	0.0166667	0.0166667	0.0316667	0.0396667	0.0211667	0.00482183
01:05:09	0.109	0.105	0.112	0.113	0.128	0.137			0.0136667	0.00966667	0.0166667	0.0176667	0.0326667	0.0416667	0.022	0.00506403
01:10:09	0.109	0.106	0.112	0.113	0.129	0.138			0.0136667	0.0106667	0.0166667	0.0176667	0.0336667	0.0426667	0.0225	0.00518599
01:15:09	0.109	0.105	0.112	0.114	0.129	0.139			0.0136667	0.00966667	0.0166667	0.0186667	0.0336667	0.0436667	0.0226667	0.00536656
01:20:09	0.109	0.106	0.112	0.114	0.13	0.141			0.0136667	0.0106667	0.0166667	0.0186667	0.0346667	0.0456667	0.0233333	0.00561941
01:25:09	0.11	0.106	0.112	0.114	0.131	0.142			0.0146667	0.0106667	0.0166667	0.0186667	0.0356667	0.0466667	0.0238333	0.00576435
01:30:09	0.11	0.106	0.113	0.116	0.133	0.144			0.0146667	0.0106667	0.0176667	0.0206667	0.0376667	0.0486667	0.025	0.00606996
01:35:09	0.112	0.106	0.113	0.117	0.135	0.147			0.0166667	0.0106667	0.0176667	0.0216667	0.0396667	0.0516667	0.0263333	0.00646873
01:40:09	0.114	0.107	0.113	0.118	0.137	0.149			0.0186667	0.0116667	0.0176667	0.0226667	0.0416667	0.0536667	0.0276667	0.00666833
01:45:09	0.117	0.107	0.114	0.12	0.141	0.152			0.0216667	0.0116667	0.0186667	0.0246667	0.0456667	0.0566667	0.0298333	0.00711532
01:50:09	0.119	0.107	0.116	0.123	0.143	0.155			0.0236667	0.0116667	0.0206667	0.0276667	0.0476667	0.0596667	0.0318333	0.00739557
01:55:09	0.122	0.108	0.117	0.125	0.148	0.158			0.0266667	0.0126667	0.0216667	0.0296667	0.0526667	0.0626667	0.0343333	0.0078514
02:00:09	0.124	0.108	0.118	0.125	0.154	0.163			0.0286667	0.0126667	0.0226667	0.0296667	0.0586667	0.0676667	0.0366667	0.00881287
02:05:09	0.125	0.109	0.12	0.124	0.157	0.169			0.0296667	0.0136667	0.0246667	0.0286667	0.0616667	0.0736667	0.0386667	0.00958471
02:10:09	0.126	0.11	0.122	0.125	0.159	0.173			0.031	0.015	0.027	0.03	0.064	0.078	0.0408333	0.00998471
02:15:09	0.126	0.111	0.124	0.127	0.158	0.174			0.0306667	0.0156667	0.0286667	0.0316667	0.0626667	0.0786667	0.0413333	0.00979002
02:20:09	0.127	0.112	0.128	0.127	0.157	0.175			0.032	0.017	0.033	0.032	0.062	0.08	0.0426667	0.00956963
02:25:09	0.126	0.113	0.131	0.129	0.158	0.177			0.031	0.018	0.036	0.034	0.063	0.082	0.044	0.00968504
02:30:09	0.126	0.115	0.133	0.131	0.16	0.179			0.031	0.02	0.038	0.036	0.065	0.084	0.0456667	0.0097798
02:35:09	0.128	0.117	0.132	0.134	0.163	0.182			0.033	0.022	0.037	0.039	0.068	0.087	0.0476667	0.0100388
02:40:09	0.131	0.12	0.133	0.136	0.166	0.183			0.036	0.025	0.038	0.041	0.071	0.088	0.0498333	0.00988405
02:45:09	0.134	0.125	0.133	0.137	0.17	0.186			0.039	0.03	0.038	0.042	0.075	0.091	0.0525	0.00999583
02:50:09	0.137	0.13	0.135	0.139	0.174	0.191			0.042	0.035	0.04	0.044	0.079	0.096	0.056	0.0102729
02:55:09	0.138	0.131	0.137	0.142	0.177	0.195			0.043	0.036	0.042	0.047	0.082	0.1	0.0583333	0.0106854
03:00:09	0.139	0.132	0.14	0.144	0.183	0.2			0.044	0.037	0.045	0.049	0.088	0.105	0.0613333	0.0114446
03:05:09	0.143	0.131	0.143	0.146	0.187	0.205			0.048	0.036	0.048	0.051	0.092	0.11	0.0641667	0.0120621
03:10:09	0.148	0.13	0.144	0.146	0.192	0.21			0.053	0.035	0.049	0.051	0.097	0.115	0.0666667	0.0129142
03:15:09	0.155	0.132	0.148	0.148	0.195	0.215			0.06	0.037	0.053	0.053	0.1	0.12	0.0705	0.0131219
03:20:09	0.156	0.133	0.15	0.15	0.199	0.219			0.061	0.038	0.055	0.055	0.104	0.124	0.0728333	0.0136368
03:25:09	0.16	0.136	0.153	0.152	0.204	0.224			0.065	0.041	0.058	0.057	0.109	0.129	0.0765	0.0140564												24h
03:30:09	0.163	0.137	0.157	0.154	0.209	0.229			0.068	0.042	0.062	0.059	0.114	0.134	0.0798333	0.0146342
03:35:09	0.166	0.14	0.16	0.156	0.214	0.233			0.071	0.045	0.065	0.061	0.119	0.138	0.0831667	0.0149631
03:40:09	0.169	0.142	0.164	0.158	0.22	0.239			0.074	0.047	0.069	0.063	0.125	0.144	0.087	0.0156652
03:45:09	0.171	0.144	0.168	0.16	0.226	0.244			0.076	0.049	0.073	0.065	0.131	0.149	0.0905	0.0162804
03:50:09	0.174	0.147	0.172	0.162	0.232	0.25			0.079	0.052	0.077	0.067	0.137	0.155	0.0945	0.0169071
03:55:09	0.177	0.15	0.175	0.164	0.237	0.256			0.082	0.055	0.08	0.069	0.142	0.161	0.0981667	0.0174879
04:00:09	0.181	0.153	0.179	0.167	0.242	0.262			0.086	0.058	0.084	0.072	0.147	0.167	0.102333	0.0179493
04:05:09	0.186	0.156	0.183	0.171	0.248	0.27			0.091	0.061	0.088	0.076	0.153	0.175	0.107333	0.0186488
04:10:09	0.19	0.159	0.187	0.175	0.257	0.276			0.095	0.064	0.092	0.08	0.162	0.181	0.112333	0.0193884
04:15:09	0.193	0.162	0.19	0.179	0.261	0.282			0.098	0.067	0.095	0.084	0.166	0.187	0.116167	0.0197744
04:20:09	0.195	0.167	0.192	0.185	0.268	0.289			0.1	0.072	0.097	0.09	0.173	0.194	0.121	0.0203404
04:25:09	0.196	0.167	0.196	0.188	0.276	0.297			0.101	0.072	0.101	0.093	0.181	0.202	0.125	0.021641
04:30:09	0.202	0.173	0.202	0.195	0.282	0.304			0.107	0.078	0.107	0.1	0.187	0.209	0.131333	0.0217112
04:35:09	0.206	0.18	0.207	0.197	0.288	0.303			0.111	0.085	0.112	0.102	0.193	0.208	0.135167	0.0211241
04:40:09	0.211	0.183	0.212	0.199	0.293	0.308			0.116333	0.0883333	0.117333	0.104333	0.198333	0.213333	0.139667	0.021444
04:45:09	0.213	0.187	0.219	0.206	0.298	0.308			0.118333	0.0923333	0.124333	0.111333	0.203333	0.213333	0.143833	0.0209041
04:50:09	0.221	0.189	0.224	0.211	0.304	0.31			0.126333	0.0943333	0.129333	0.116333	0.209333	0.215333	0.1485	0.0208125
04:55:09	0.227	0.194	0.23	0.216	0.308	0.318			0.132333	0.0993333	0.135333	0.121333	0.213333	0.223333	0.154167	0.0209768
05:00:09	0.234	0.198	0.236	0.234	0.309	0.326			0.139333	0.103333	0.141333	0.139333	0.214333	0.231333	0.1615	0.020364
05:05:09	0.238	0.203	0.243	0.226	0.311	0.332			0.143333	0.108333	0.148333	0.131333	0.216333	0.237333	0.164167	0.0207805
05:10:09	0.245	0.208	0.25	0.236	0.315	0.337			0.150333	0.113333	0.155333	0.141333	0.220333	0.242333	0.1705	0.0203296
05:15:09	0.251	0.213	0.258	0.238	0.318	0.344			0.156333	0.118333	0.163333	0.143333	0.223333	0.249333	0.175667	0.0204592
05:20:09	0.257	0.218	0.265	0.244	0.322	0.351			0.162333	0.123333	0.170333	0.149333	0.227333	0.256333	0.1815	0.0205027
05:25:09	0.263	0.223	0.272	0.252	0.331	0.357			0.168333	0.128333	0.177333	0.157333	0.236333	0.262333	0.188333	0.0207059
05:30:09	0.272	0.229	0.279	0.257	0.339	0.355			0.177333	0.134333	0.184333	0.162333	0.244333	0.260333	0.193833	0.0198893
05:35:09	0.282	0.234	0.286	0.261	0.344	0.353			0.187333	0.139333	0.191333	0.166333	0.249333	0.258333	0.198667	0.0190397
05:40:09	0.305	0.239	0.299	0.269	0.362	0.367			0.210333	0.144333	0.204333	0.174333	0.267333	0.272333	0.212167	0.0206243
05:45:08	0.35	0.245	0.313	0.281	0.376	0.401			0.255333	0.150333	0.218333	0.186333	0.281333	0.306333	0.233	0.0241104
05:50:09	0.42	0.253	0.346	0.298	0.41	0.437			0.325333	0.158333	0.251333	0.203333	0.315333	0.342333	0.266	0.0302849
05:55:09	0.467	0.262	0.373	0.313	0.434	0.476			0.372333	0.167333	0.278333	0.218333	0.339333	0.381333	0.292833	0.0355084
06:00:09	0.465	0.272	0.404	0.379	0.457	0.506			0.370667	0.177667	0.309667	0.284667	0.362667	0.411667	0.3195	0.0338639												12h
06:05:09	0.472	0.276	0.428	0.468	0.482	0.521			0.377667	0.181667	0.333667	0.373667	0.387667	0.426667	0.346833	0.035197
06:10:09	0.48	0.282	0.442	0.447	0.496	0.529			0.385333	0.187333	0.347333	0.352333	0.401333	0.434333	0.351333	0.0353355
06:15:09	0.495	0.293	0.444	0.466	0.51	0.538			0.400667	0.198667	0.349667	0.371667	0.415667	0.443667	0.363333	0.0355703
06:20:09	0.475	0.308	0.465	0.462	0.521	0.539			0.380667	0.213667	0.370667	0.367667	0.426667	0.444667	0.367333	0.0333183
06:25:09	0.491	0.361	0.473	0.485	0.523	0.542			0.396333	0.266333	0.378333	0.390333	0.428333	0.447333	0.3845	0.0258488
06:30:09	0.492	0.405	0.48	0.484	0.528	0.545			0.397667	0.310667	0.385667	0.389667	0.433667	0.450667	0.394667	0.0198561
06:35:09	0.485	0.424	0.486	0.488	0.529	0.545			0.390667	0.329667	0.391667	0.393667	0.434667	0.450667	0.3985	0.0172229
06:40:09	0.498	0.416	0.484	0.486	0.533	0.543			0.403667	0.321667	0.389667	0.391667	0.438667	0.448667	0.399	0.018424
06:45:09	0.485	0.461	0.485	0.489	0.536	0.544			0.390667	0.366667	0.390667	0.394667	0.441667	0.449667	0.405667	0.0133217
06:50:08	0.494	0.459	0.485	0.489	0.538	0.543			0.399667	0.364667	0.390667	0.394667	0.443667	0.448667	0.407	0.0133483
06:55:09	0.5	0.467	0.483	0.502	0.538	0.54			0.405667	0.372667	0.388667	0.407667	0.443667	0.445667	0.410667	0.0119387
07:00:09	0.496	0.494	0.485	0.495	0.54	0.539			0.401667	0.399667	0.390667	0.400667	0.445667	0.444667	0.413833	0.010038
07:05:09	0.498	0.497	0.485	0.493	0.539	0.538			0.404	0.403	0.391	0.399	0.445	0.444	0.414333	0.00972168
07:10:09	0.502	0.489	0.484	0.496	0.541	0.539			0.407667	0.394667	0.389667	0.401667	0.446667	0.444667	0.414167	0.0102721
07:15:09	0.504	0.492	0.485	0.498	0.54	0.54			0.409667	0.397667	0.390667	0.403667	0.445667	0.445667	0.4155	0.00988068
07:20:09	0.502	0.495	0.486	0.5	0.54	0.54			0.408	0.401	0.392	0.406	0.446	0.446	0.4165	0.00959774
07:25:09	0.505	0.494	0.486	0.501	0.539	0.54			0.411	0.4	0.392	0.407	0.445	0.446	0.416833	0.00944252
07:30:09	0.505	0.496	0.487	0.5	0.538	0.541			0.411	0.402	0.393	0.406	0.444	0.447	0.417167	0.00928589
07:35:09	0.507	0.496	0.49	0.503	0.534	0.542			0.412667	0.401667	0.395667	0.408667	0.439667	0.447667	0.417667	0.00862168
07:40:09	0.507	0.497	0.49	0.503	0.531	0.543			0.413	0.403	0.396	0.409	0.437	0.449	0.417833	0.00843966
07:45:09	0.507	0.495	0.49	0.504	0.532	0.542			0.413	0.401	0.396	0.41	0.438	0.448	0.417667	0.0084879
07:50:09	0.509	0.498	0.492	0.503	0.533	0.543			0.415	0.404	0.398	0.409	0.439	0.449	0.419	0.00833067
07:55:09	0.511	0.497	0.493	0.503	0.536	0.544			0.417	0.403	0.399	0.409	0.442	0.45	0.42	0.0086487
08:00:09	0.511	0.498	0.494	0.503	0.536	0.545			0.417	0.404	0.4	0.409	0.442	0.451	0.4205	0.00862071
08:05:09	0.509	0.498	0.496	0.503	0.536	0.546			0.415	0.404	0.402	0.409	0.442	0.452	0.420667	0.00862426
08:10:09	0.509	0.499	0.497	0.504	0.536	0.548			0.415	0.405	0.403	0.41	0.442	0.454	0.4215	0.00869003
08:15:09	0.51	0.499	0.498	0.504	0.536	0.547			0.416	0.405	0.404	0.41	0.442	0.453	0.421667	0.00847218
08:20:09	0.51	0.5	0.499	0.505	0.535	0.548			0.416	0.406	0.405	0.411	0.441	0.454	0.422167	0.00834033
08:25:09	0.51	0.503	0.5	0.506	0.539	0.551			0.416	0.409	0.406	0.412	0.445	0.457	0.424167	0.00873085
08:30:09	0.511	0.503	0.503	0.506	0.538	0.551			0.417	0.409	0.409	0.412	0.444	0.457	0.424667	0.00842483
08:35:09	0.511	0.504	0.504	0.506	0.541	0.552			0.417	0.41	0.41	0.412	0.447	0.458	0.425667	0.00866667
08:40:09	0.512	0.503	0.505	0.506	0.541	0.553			0.418	0.409	0.411	0.412	0.447	0.459	0.426	0.00876356
08:45:09	0.512	0.502	0.506	0.505	0.542	0.555			0.418	0.408	0.412	0.411	0.448	0.461	0.426333	0.0091603
08:50:09	0.509	0.503	0.508	0.507	0.542	0.557			0.415	0.409	0.414	0.413	0.448	0.463	0.427	0.00925563
08:55:09	0.509	0.503	0.509	0.507	0.545	0.558			0.415	0.409	0.415	0.413	0.451	0.464	0.427833	0.00957224
09:00:09	0.51	0.503	0.511	0.509	0.547	0.559			0.416	0.409	0.417	0.415	0.453	0.465	0.429167	0.0096278
09:05:09	0.513	0.503	0.512	0.511	0.55	0.559			0.419	0.409	0.418	0.417	0.456	0.465	0.430667	0.0096148
09:10:09	0.513	0.503	0.513	0.511	0.551	0.563			0.419	0.409	0.419	0.417	0.457	0.469	0.431667	0.0101412
09:15:09	0.514	0.504	0.516	0.513	0.551	0.565			0.42	0.41	0.422	0.419	0.457	0.471	0.433167	0.0100579
09:20:09	0.515	0.504	0.517	0.513	0.552	0.567			0.421	0.41	0.423	0.419	0.458	0.473	0.434	0.0103086
09:25:09	0.517	0.505	0.518	0.514	0.553	0.567			0.423	0.411	0.424	0.42	0.459	0.473	0.435	0.0101423
09:30:09	0.518	0.505	0.519	0.519	0.555	0.569			0.424	0.411	0.425	0.425	0.461	0.475	0.436833	0.0102516
09:35:09	0.521	0.506	0.521	0.519	0.557	0.572			0.427	0.412	0.427	0.425	0.463	0.478	0.438667	0.0105029
09:40:09	0.523	0.507	0.523	0.519	0.559	0.572			0.429	0.413	0.429	0.425	0.465	0.478	0.439833	0.0104321
09:45:09	0.523	0.508	0.524	0.519	0.56	0.575			0.429	0.414	0.43	0.425	0.466	0.481	0.440833	0.0107623
09:50:09	0.525	0.507	0.525	0.521	0.562	0.575			0.431	0.413	0.431	0.427	0.468	0.481	0.441833	0.0108087
09:55:09	0.527	0.509	0.528	0.521	0.564	0.578			0.433	0.415	0.434	0.427	0.47	0.484	0.443833	0.0109952
10:00:09	0.528	0.51	0.529	0.52	0.565	0.579			0.434	0.416	0.435	0.426	0.471	0.485	0.4445	0.0111018
10:05:09	0.529	0.511	0.53	0.521	0.566	0.58			0.435	0.417	0.436	0.427	0.472	0.486	0.4455	0.0111018
10:10:09	0.531	0.511	0.531	0.524	0.567	0.582			0.437	0.417	0.437	0.43	0.473	0.488	0.447	0.0111744
10:15:09	0.533	0.512	0.534	0.524	0.569	0.585			0.439	0.418	0.44	0.43	0.475	0.491	0.448833	0.0114642
10:20:09	0.534	0.513	0.535	0.526	0.57	0.586			0.44	0.419	0.441	0.432	0.476	0.492	0.45	0.0114105
10:25:09	0.536	0.515	0.537	0.526	0.572	0.587			0.442	0.421	0.443	0.432	0.478	0.493	0.4515	0.0113981
10:30:09	0.538	0.517	0.538	0.528	0.574	0.589			0.444	0.423	0.444	0.434	0.48	0.495	0.453333	0.0114241
10:35:09	0.539	0.518	0.539	0.529	0.574	0.591			0.445333	0.424333	0.445333	0.435333	0.480333	0.497333	0.454667	0.0114707
10:40:09	0.54	0.519	0.541	0.53	0.575	0.592			0.446	0.425	0.447	0.436	0.481	0.498	0.4555	0.0114448
10:45:09	0.542	0.519	0.542	0.531	0.578	0.593			0.448	0.425	0.448	0.437	0.484	0.499	0.456833	0.0116602
10:50:09	0.543	0.521	0.543	0.533	0.579	0.594			0.449	0.427	0.449	0.439	0.485	0.5	0.458167	0.0115135
10:55:09	0.545	0.523	0.545	0.535	0.58	0.596			0.451	0.429	0.451	0.441	0.486	0.502	0.46	0.0114368
11:00:09	0.547	0.524	0.547	0.535	0.58	0.599			0.453333	0.430333	0.453333	0.441333	0.486333	0.505333	0.461667	0.011618
11:05:09	0.548	0.524	0.548	0.536	0.581	0.601			0.454	0.43	0.454	0.442	0.487	0.507	0.462333	0.011834
11:10:09	0.549	0.526	0.55	0.537	0.583	0.603			0.455333	0.432333	0.456333	0.443333	0.489333	0.509333	0.464333	0.0119164
11:15:09	0.552	0.527	0.55	0.538	0.585	0.604			0.458	0.433	0.456	0.444	0.491	0.51	0.465333	0.0119657
11:20:09	0.552	0.527	0.551	0.54	0.586	0.607			0.458	0.433	0.457	0.446	0.492	0.513	0.4665	0.0122712
11:25:09	0.554	0.529	0.553	0.543	0.588	0.611			0.460333	0.435333	0.459333	0.449333	0.494333	0.517333	0.469333	0.0124713
11:30:09	0.556	0.529	0.554	0.545	0.589	0.612			0.462667	0.435667	0.460667	0.451667	0.495667	0.518667	0.470833	0.0124884
11:35:09	0.557	0.531	0.555	0.546	0.592	0.614			0.463	0.437	0.461	0.452	0.498	0.52	0.471833	0.0126581
11:40:09	0.56	0.532	0.556	0.547	0.594	0.615			0.466333	0.438333	0.462333	0.453333	0.500333	0.521333	0.473667	0.0126851
11:45:09	0.562	0.532	0.557	0.548	0.595	0.618			0.468333	0.438333	0.463333	0.454333	0.501333	0.524333	0.475	0.013012
11:50:09	0.562	0.534	0.559	0.55	0.597	0.621			0.468333	0.440333	0.465333	0.456333	0.503333	0.527333	0.476833	0.0131776
11:55:09	0.566	0.534	0.561	0.552	0.6	0.623			0.472	0.44	0.467	0.458	0.506	0.529	0.478667	0.0133957
12:00:09	0.565	0.535	0.562	0.554	0.602	0.626			0.471333	0.441333	0.468333	0.460333	0.508333	0.532333	0.480333	0.013704
12:05:09	0.568	0.536	0.565	0.557	0.603	0.629			0.474333	0.442333	0.471333	0.463333	0.509333	0.535333	0.482667	0.0137639
12:10:09	0.57	0.538	0.567	0.559	0.605	0.631			0.476667	0.444667	0.473667	0.465667	0.511667	0.537667	0.485	0.0137639
12:15:09	0.569	0.54	0.569	0.56	0.607	0.633			0.475333	0.446333	0.475333	0.466333	0.513333	0.539333	0.486	0.0138796
12:20:08	0.573	0.541	0.57	0.561	0.61	0.636			0.479667	0.447667	0.476667	0.467667	0.516667	0.542667	0.4885	0.0141972
12:25:09	0.575	0.543	0.572	0.561	0.612	0.64			0.481333	0.449333	0.478333	0.467333	0.518333	0.546333	0.490167	0.0145543
12:30:09	0.578	0.545	0.573	0.562	0.615	0.642			0.484667	0.451667	0.479667	0.468667	0.521667	0.548667	0.4925	0.014682
12:35:09	0.58	0.546	0.574	0.563	0.617	0.644			0.486667	0.452667	0.480667	0.469667	0.523667	0.550667	0.494	0.0148586
12:40:09	0.581	0.549	0.575	0.566	0.619	0.645			0.487667	0.455667	0.481667	0.472667	0.525667	0.551667	0.495833	0.0146342
12:45:09	0.582	0.551	0.577	0.568	0.622	0.648			0.488667	0.457667	0.483667	0.474667	0.528667	0.554667	0.498	0.0148496
12:50:09	0.584	0.552	0.579	0.57	0.624	0.651			0.490667	0.458667	0.485667	0.476667	0.530667	0.557667	0.5	0.015068
12:55:09	0.587	0.554	0.581	0.572	0.626	0.652			0.493667	0.460667	0.487667	0.478667	0.532667	0.558667	0.502	0.0149213
13:00:09	0.591	0.556	0.583	0.573	0.628	0.653			0.497333	0.462333	0.489333	0.479333	0.534333	0.559333	0.503667	0.0148159
13:05:09	0.594	0.556	0.584	0.575	0.63	0.657			0.500667	0.462667	0.490667	0.481667	0.536667	0.563667	0.506	0.0152745
13:10:09	0.598	0.558	0.585	0.577	0.632	0.658			0.504667	0.464667	0.491667	0.483667	0.538667	0.564667	0.508	0.015165
13:15:09	0.603	0.56	0.588	0.579	0.635	0.66			0.509667	0.466667	0.494667	0.485667	0.541667	0.566667	0.510833	0.015182
13:20:09	0.601	0.561	0.588	0.581	0.637	0.661			0.507667	0.467667	0.494667	0.487667	0.543667	0.567667	0.5115	0.01525
13:25:09	0.602	0.562	0.59	0.582	0.64	0.665			0.508667	0.468667	0.496667	0.488667	0.546667	0.571667	0.5135	0.0157235
13:30:09	0.603	0.563	0.592	0.583	0.641	0.666			0.51	0.47	0.499	0.49	0.548	0.573	0.515	0.0156886
13:35:09	0.603	0.565	0.595	0.584	0.642	0.667			0.509667	0.471667	0.501667	0.490667	0.548667	0.573667	0.516	0.0155406
13:40:09	0.605	0.568	0.596	0.586	0.643	0.668			0.512	0.475	0.503	0.493	0.55	0.575	0.518	0.015284
13:45:09	0.605	0.568	0.598	0.587	0.645	0.67			0.511667	0.474667	0.504667	0.493667	0.551667	0.576667	0.518833	0.0155551
13:50:09	0.61	0.569	0.599	0.589	0.646	0.671			0.516667	0.475667	0.505667	0.495667	0.552667	0.577667	0.520667	0.0154532
13:55:09	0.61	0.571	0.601	0.594	0.648	0.673			0.516667	0.477667	0.507667	0.500667	0.554667	0.579667	0.522833	0.0153219
14:00:09	0.61	0.572	0.602	0.593	0.649	0.675			0.517333	0.479333	0.509333	0.500333	0.556333	0.582333	0.524167	0.0155594
14:05:09	0.613	0.574	0.604	0.593	0.65	0.677			0.520333	0.481333	0.511333	0.500333	0.557333	0.584333	0.525833	0.0155836
14:10:09	0.615	0.575	0.606	0.595	0.651	0.679			0.521667	0.481667	0.512667	0.501667	0.557667	0.585667	0.526833	0.0156129
14:15:09	0.616	0.577	0.607	0.596	0.652	0.68			0.523	0.484	0.514	0.503	0.559	0.587	0.528333	0.015517
14:20:09	0.619	0.577	0.609	0.597	0.654	0.681			0.526333	0.484333	0.516333	0.504333	0.561333	0.588333	0.530167	0.0156299
14:25:09	0.62	0.579	0.611	0.598	0.654	0.682			0.527	0.486	0.518	0.505	0.561	0.589	0.531	0.015438
14:30:09	0.622	0.58	0.612	0.599	0.656	0.684			0.529333	0.487333	0.519333	0.506333	0.563333	0.591333	0.532833	0.01562
14:35:09	0.624	0.582	0.614	0.6	0.657	0.686			0.531333	0.489333	0.521333	0.507333	0.564333	0.593333	0.5345	0.0156129
14:40:09	0.626	0.583	0.616	0.602	0.658	0.688			0.533333	0.490333	0.523333	0.509333	0.565333	0.595333	0.536167	0.015647
14:45:09	0.628	0.585	0.617	0.605	0.659	0.689			0.535333	0.492333	0.524333	0.512333	0.566333	0.596333	0.537833	0.015431
14:50:09	0.631	0.587	0.619	0.612	0.662	0.692			0.538333	0.494333	0.526333	0.519333	0.569333	0.599333	0.541167	0.0153567
14:55:09	0.632	0.588	0.62	0.616	0.663	0.692			0.539333	0.495333	0.527333	0.523333	0.570333	0.599333	0.5425	0.0150962
15:00:09	0.632	0.589	0.621	0.616	0.665	0.695			0.539333	0.496333	0.528333	0.523333	0.572333	0.602333	0.543667	0.0154611
15:05:09	0.634	0.591	0.623	0.615	0.665	0.695			0.541333	0.498333	0.530333	0.522333	0.572333	0.602333	0.5445	0.0152237
15:10:09	0.636	0.593	0.625	0.617	0.666	0.697			0.543333	0.500333	0.532333	0.524333	0.573333	0.604333	0.546333	0.0151636
15:15:09	0.637	0.594	0.626	0.622	0.667	0.697			0.544333	0.501333	0.533333	0.529333	0.574333	0.604333	0.547833	0.0148565
15:20:08	0.64	0.596	0.628	0.619	0.669	0.699			0.547333	0.503333	0.535333	0.526333	0.576333	0.606333	0.549167	0.0150807
15:25:09	0.64	0.598	0.629	0.621	0.67	0.701			0.547333	0.505333	0.536333	0.528333	0.577333	0.608333	0.5505	0.015063
15:30:09	0.64	0.599	0.63	0.626	0.672	0.703			0.547333	0.506333	0.537333	0.533333	0.579333	0.610333	0.552333	0.0150776
15:35:09	0.645	0.6	0.631	0.624	0.674	0.705			0.552333	0.507333	0.538333	0.531333	0.581333	0.612333	0.553833	0.0153726
15:40:09	0.648	0.602	0.633	0.623	0.674	0.707			0.555333	0.509333	0.540333	0.530333	0.581333	0.614333	0.555167	0.0154087
15:45:09	0.647	0.603	0.634	0.63	0.676	0.709			0.554333	0.510333	0.541333	0.537333	0.583333	0.616333	0.557167	0.0153089
15:50:09	0.649	0.605	0.636	0.63	0.677	0.709			0.556333	0.512333	0.543333	0.537333	0.584333	0.616333	0.558333	0.0150842
15:55:09	0.65	0.606	0.637	0.629	0.679	0.71			0.557333	0.513333	0.544333	0.536333	0.586333	0.617333	0.559167	0.015239
16:00:09	0.653	0.608	0.639	0.627	0.68	0.711			0.560333	0.515333	0.546333	0.534333	0.587333	0.618333	0.560333	0.0152643
16:05:09	0.655	0.609	0.641	0.63	0.682	0.714			0.562333	0.516333	0.548333	0.537333	0.589333	0.621333	0.5625	0.0154346
16:10:09	0.656	0.611	0.642	0.629	0.682	0.715			0.563333	0.518333	0.549333	0.536333	0.589333	0.622333	0.563167	0.0153914
16:15:09	0.657	0.613	0.643	0.63	0.685	0.715			0.564333	0.520333	0.550333	0.537333	0.592333	0.622333	0.5645	0.0152849
16:20:09	0.66	0.614	0.644	0.631	0.686	0.716			0.567333	0.521333	0.551333	0.538333	0.593333	0.623333	0.565833	0.0152878
16:25:09	0.663	0.615	0.646	0.633	0.688	0.718			0.570333	0.522333	0.553333	0.540333	0.595333	0.625333	0.567833	0.0153899
16:30:09	0.663	0.617	0.647	0.633	0.689	0.72			0.570333	0.524333	0.554333	0.540333	0.596333	0.627333	0.568833	0.0154742
16:35:09	0.662	0.619	0.648	0.635	0.69	0.721			0.569333	0.526333	0.555333	0.542333	0.597333	0.628333	0.569833	0.0153161
16:40:09	0.664	0.62	0.648	0.637	0.692	0.722			0.571333	0.527333	0.555333	0.544333	0.599333	0.629333	0.571167	0.0153502
16:45:09	0.667	0.621	0.65	0.639	0.692	0.724			0.574333	0.528333	0.557333	0.546333	0.599333	0.631333	0.572833	0.0153292
16:50:09	0.667	0.622	0.652	0.64	0.694	0.725			0.574333	0.529333	0.559333	0.547333	0.601333	0.632333	0.574	0.0153529
16:55:09	0.668	0.624	0.653	0.641	0.695	0.725			0.575333	0.531333	0.560333	0.548333	0.602333	0.632333	0.575	0.0151298
17:00:09	0.669	0.625	0.654	0.642	0.696	0.728			0.576333	0.532333	0.561333	0.549333	0.603333	0.635333	0.576333	0.015384
17:05:09	0.67	0.626	0.655	0.644	0.697	0.729			0.577333	0.533333	0.562333	0.551333	0.604333	0.636333	0.5775	0.0153263
17:10:09	0.671	0.628	0.657	0.646	0.698	0.73			0.578333	0.535333	0.564333	0.553333	0.605333	0.637333	0.579	0.0151408
17:15:09	0.672	0.63	0.658	0.647	0.699	0.731			0.579333	0.537333	0.565333	0.554333	0.606333	0.638333	0.580167	0.0150453
17:20:09	0.675	0.63	0.659	0.648	0.7	0.732			0.582333	0.537333	0.566333	0.555333	0.607333	0.639333	0.581333	0.0151416
17:25:09	0.677	0.631	0.659	0.648	0.702	0.734			0.584333	0.538333	0.566333	0.555333	0.609333	0.641333	0.5825	0.0154217
17:30:09	0.677	0.632	0.66	0.65	0.703	0.736			0.584333	0.539333	0.567333	0.557333	0.610333	0.643333	0.583667	0.0154891
17:35:09	0.675	0.631	0.66	0.649	0.703	0.737			0.582333	0.538333	0.567333	0.556333	0.610333	0.644333	0.583167	0.01577
17:40:09	0.679	0.635	0.663	0.651	0.705	0.738			0.586333	0.542333	0.570333	0.558333	0.612333	0.645333	0.585833	0.0154181
17:45:09	0.681	0.636	0.664	0.653	0.706	0.74			0.588333	0.543333	0.571333	0.560333	0.613333	0.647333	0.587333	0.0154898
17:50:09	0.681	0.638	0.666	0.656	0.707	0.74			0.588333	0.545333	0.573333	0.563333	0.614333	0.647333	0.588667	0.0151166
17:55:09	0.683	0.638	0.666	0.658	0.707	0.741			0.590333	0.545333	0.573333	0.565333	0.614333	0.648333	0.5895	0.0151381
18:00:09	0.684	0.64	0.667	0.659	0.709	0.741			0.591333	0.547333	0.574333	0.566333	0.616333	0.648333	0.590667	0.0149681
18:05:09	0.685	0.641	0.67	0.659	0.711	0.742			0.592333	0.548333	0.577333	0.566333	0.618333	0.649333	0.592	0.0150126
18:10:09	0.686	0.643	0.67	0.659	0.712	0.744			0.593333	0.550333	0.577333	0.566333	0.619333	0.651333	0.593	0.0151364
18:15:09	0.687	0.644	0.671	0.66	0.713	0.745			0.594333	0.551333	0.578333	0.567333	0.620333	0.652333	0.594	0.0151364
18:20:09	0.688	0.644	0.672	0.661	0.714	0.747			0.595333	0.551333	0.579333	0.568333	0.621333	0.654333	0.595	0.0153594
18:25:09	0.689	0.646	0.674	0.663	0.714	0.748			0.596333	0.553333	0.581333	0.570333	0.621333	0.655333	0.596333	0.0151173
18:30:09	0.691	0.646	0.674	0.663	0.716	0.749			0.598333	0.553333	0.581333	0.570333	0.623333	0.656333	0.597167	0.015361
18:35:09	0.693	0.646	0.675	0.664	0.719	0.749			0.600333	0.553333	0.582333	0.571333	0.626333	0.656333	0.598333	0.015451
18:40:09	0.695	0.649	0.676	0.665	0.72	0.751			0.602333	0.556333	0.583333	0.572333	0.627333	0.658333	0.6	0.0153898
18:45:09	0.697	0.65	0.678	0.667	0.721	0.752			0.604333	0.557333	0.585333	0.574333	0.628333	0.659333	0.6015	0.0153001
18:50:09	0.699	0.651	0.678	0.668	0.721	0.754			0.606333	0.558333	0.585333	0.575333	0.628333	0.661333	0.6025	0.015413
18:55:09	0.7	0.651	0.679	0.67	0.721	0.754			0.607333	0.558333	0.586333	0.577333	0.628333	0.661333	0.603167	0.0152696
19:00:09	0.701	0.653	0.68	0.67	0.722	0.755			0.608333	0.560333	0.587333	0.577333	0.629333	0.662333	0.604167	0.0152303
19:05:09	0.702	0.653	0.682	0.672	0.723	0.756			0.609333	0.560333	0.589333	0.579333	0.630333	0.663333	0.605333	0.0152337
19:10:09	0.703	0.655	0.682	0.672	0.724	0.759			0.610333	0.562333	0.589333	0.579333	0.631333	0.666333	0.6065	0.0154864
19:15:09	0.704	0.656	0.684	0.672	0.725	0.759			0.611333	0.563333	0.591333	0.579333	0.632333	0.666333	0.607333	0.0153818
19:20:09	0.705	0.656	0.685	0.675	0.726	0.76			0.612333	0.563333	0.592333	0.582333	0.633333	0.667333	0.6085	0.015361
19:25:09	0.706	0.657	0.685	0.676	0.727	0.76			0.613333	0.564333	0.592333	0.583333	0.634333	0.667333	0.609167	0.0152696
19:30:09	0.708	0.659	0.687	0.678	0.728	0.761			0.615333	0.566333	0.594333	0.585333	0.635333	0.668333	0.610833	0.0150881
19:35:09	0.709	0.659	0.687	0.68	0.729	0.762			0.616333	0.566333	0.594333	0.587333	0.636333	0.669333	0.611667	0.0151694
19:40:09	0.71	0.659	0.689	0.681	0.731	0.764			0.617667	0.566667	0.596667	0.588667	0.638667	0.671667	0.613333	0.0154136
19:45:09	0.712	0.661	0.69	0.682	0.732	0.763			0.619333	0.568333	0.597333	0.589333	0.639333	0.670333	0.614	0.0150724
19:50:09	0.712	0.662	0.69	0.682	0.734	0.763			0.619667	0.569667	0.597667	0.589667	0.641667	0.670667	0.614833	0.0150873
19:55:09	0.713	0.663	0.692	0.683	0.735	0.764			0.620667	0.570667	0.599667	0.590667	0.642667	0.671667	0.616	0.0150503
20:00:09	0.715	0.665	0.693	0.685	0.737	0.767			0.622667	0.572667	0.600667	0.592667	0.644667	0.674667	0.618	0.0152111
20:05:09	0.716	0.666	0.694	0.687	0.738	0.768			0.623667	0.573667	0.601667	0.594667	0.645667	0.675667	0.619167	0.0151564
20:10:09	0.717	0.666	0.695	0.687	0.738	0.769			0.624667	0.573667	0.602667	0.594667	0.645667	0.676667	0.619667	0.0152534
20:15:09	0.717	0.666	0.695	0.688	0.738	0.769			0.624667	0.573667	0.602667	0.595667	0.645667	0.676667	0.619833	0.0151996
20:20:09	0.719	0.669	0.697	0.69	0.739	0.77			0.627	0.577	0.605	0.598	0.647	0.678	0.622	0.0149176
20:25:09	0.72	0.668	0.698	0.691	0.74	0.773			0.628	0.576	0.606	0.599	0.648	0.681	0.623	0.015371
20:30:09	0.721	0.67	0.699	0.692	0.74	0.773			0.629	0.578	0.607	0.6	0.648	0.681	0.623833	0.0150895
20:35:09	0.724	0.671	0.7	0.694	0.741	0.774			0.632	0.579	0.608	0.602	0.649	0.682	0.625333	0.0150636
20:40:09	0.725	0.672	0.701	0.695	0.742	0.774			0.633	0.58	0.609	0.603	0.65	0.682	0.626167	0.0149386
20:45:09	0.725	0.672	0.702	0.697	0.742	0.776			0.633	0.58	0.61	0.605	0.65	0.684	0.627	0.015051
20:50:09	0.726	0.674	0.703	0.698	0.744	0.777			0.634	0.582	0.611	0.606	0.652	0.685	0.628333	0.0149993
20:55:09	0.727	0.675	0.704	0.698	0.744	0.778			0.635	0.583	0.612	0.606	0.652	0.686	0.629	0.0149978
21:00:09	0.728	0.674	0.706	0.701	0.746	0.78			0.636	0.582	0.614	0.609	0.654	0.688	0.6305	0.0152485
21:05:09	0.73	0.676	0.707	0.704	0.748	0.779			0.638	0.584	0.615	0.612	0.656	0.687	0.632	0.0148661
21:10:09	0.731	0.678	0.707	0.704	0.749	0.78			0.639	0.586	0.615	0.612	0.657	0.688	0.632833	0.0148446
21:15:09	0.732	0.68	0.709	0.705	0.75	0.783			0.64	0.588	0.617	0.613	0.658	0.691	0.6345	0.0149505
21:20:09	0.733	0.679	0.71	0.704	0.75	0.784			0.641333	0.587333	0.618333	0.612333	0.658333	0.692333	0.635	0.0152045
21:25:09	0.734	0.68	0.711	0.705	0.752	0.785			0.642	0.588	0.619	0.613	0.66	0.693	0.635833	0.0152565
21:30:09	0.735	0.682	0.712	0.706	0.752	0.785			0.643	0.59	0.62	0.614	0.66	0.693	0.636667	0.0149748
21:35:09	0.735	0.684	0.712	0.708	0.752	0.786			0.643333	0.592333	0.620333	0.616333	0.660333	0.694333	0.637833	0.0147958
21:40:09	0.736	0.687	0.714	0.71	0.753	0.787			0.644	0.595	0.622	0.618	0.661	0.695	0.639167	0.0145038
21:45:09	0.738	0.685	0.715	0.711	0.754	0.789			0.646	0.593	0.623	0.619	0.662	0.697	0.64	0.0149533
21:50:09	0.739	0.686	0.716	0.713	0.755	0.79			0.647	0.594	0.624	0.621	0.663	0.698	0.641167	0.0149073
21:55:09	0.741	0.687	0.717	0.714	0.756	0.791			0.649	0.595	0.625	0.622	0.664	0.699	0.642333	0.0149213
22:00:09	0.743	0.688	0.717	0.716	0.757	0.792			0.651	0.596	0.625	0.624	0.665	0.7	0.6435	0.0149326
22:05:09	0.743	0.689	0.718	0.717	0.758	0.792			0.651333	0.597333	0.626333	0.625333	0.666333	0.700333	0.6445	0.0147906
22:10:09	0.745	0.69	0.719	0.718	0.759	0.794			0.653333	0.598333	0.627333	0.626333	0.667333	0.702333	0.645833	0.0149326
22:15:09	0.747	0.692	0.721	0.72	0.76	0.795			0.655333	0.600333	0.629333	0.628333	0.668333	0.703333	0.6475	0.014759
22:20:09	0.747	0.692	0.721	0.722	0.762	0.797			0.655333	0.600333	0.629333	0.630333	0.670333	0.705333	0.6485	0.0150231
22:25:09	0.748	0.694	0.723	0.723	0.763	0.797			0.656333	0.602333	0.631333	0.631333	0.671333	0.705333	0.649667	0.0147483
22:30:09	0.748	0.696	0.725	0.726	0.764	0.798			0.656333	0.604333	0.633333	0.634333	0.672333	0.706333	0.651167	0.0145061
22:35:09	0.747	0.698	0.725	0.727	0.764	0.799			0.655333	0.606333	0.633333	0.635333	0.672333	0.707333	0.651667	0.0143728
22:40:09	0.749	0.698	0.726	0.73	0.766	0.801			0.657333	0.606333	0.634333	0.638333	0.674333	0.709333	0.653333	0.0145922
22:45:09	0.751	0.699	0.727	0.731	0.767	0.803			0.659333	0.607333	0.635333	0.639333	0.675333	0.711333	0.654667	0.0147302
22:50:09	0.752	0.7	0.728	0.733	0.769	0.803			0.660333	0.608333	0.636333	0.641333	0.677333	0.711333	0.655833	0.0146168
22:55:09	0.753	0.7	0.729	0.736	0.77	0.804			0.661333	0.608333	0.637333	0.644333	0.678333	0.712333	0.657	0.0146644
23:00:09	0.754	0.701	0.731	0.737	0.771	0.805			0.662333	0.609333	0.639333	0.645333	0.679333	0.713333	0.658167	0.0146206
23:05:09	0.755	0.703	0.732	0.738	0.772	0.806			0.663333	0.611333	0.640333	0.646333	0.680333	0.714333	0.659333	0.0145098
23:10:09	0.756	0.704	0.733	0.74	0.774	0.807			0.664333	0.612333	0.641333	0.648333	0.682333	0.715333	0.660667	0.0145297
23:15:09	0.757	0.705	0.734	0.743	0.774	0.809			0.665333	0.613333	0.642333	0.651333	0.682333	0.717333	0.662	0.0145549
23:20:09	0.759	0.706	0.736	0.744	0.774	0.811			0.667333	0.614333	0.644333	0.652333	0.682333	0.719333	0.663333	0.0146014
23:25:09	0.76	0.708	0.737	0.746	0.774	0.811			0.668333	0.616333	0.645333	0.654333	0.682333	0.719333	0.664333	0.0142945
23:30:09	0.761	0.708	0.738	0.748	0.775	0.813			0.669333	0.616333	0.646333	0.656333	0.683333	0.721333	0.6655	0.014513
23:35:09	0.762	0.71	0.739	0.751	0.776	0.814			0.670333	0.618333	0.647333	0.659333	0.684333	0.722333	0.667	0.0143612
23:40:09	0.763	0.711	0.74	0.753	0.777	0.815			0.671333	0.619333	0.648333	0.661333	0.685333	0.723333	0.668167	0.0143444
23:45:09	0.765	0.712	0.741	0.755	0.778	0.815			0.673333	0.620333	0.649333	0.663333	0.686333	0.723333	0.669333	0.0142103
23:50:09	0.765	0.713	0.743	0.757	0.779	0.815			0.673333	0.621333	0.651333	0.665333	0.687333	0.723333	0.670333	0.0140167
23:55:09	0.766	0.715	0.743	0.759	0.78	0.816			0.674333	0.623333	0.651333	0.667333	0.688333	0.724333	0.6715	0.0139366
1 day, 0:00:09	0.767	0.716	0.744	0.76	0.782	0.818			0.675333	0.624333	0.652333	0.668333	0.690333	0.726333	0.672833	0.0141038
1 day, 0:05:09	0.769	0.716	0.745	0.761	0.784	0.819			0.677333	0.624333	0.653333	0.669333	0.692333	0.727333	0.674	0.0142681
1 day, 0:10:09	0.769	0.718	0.746	0.763	0.785	0.819			0.677333	0.626333	0.654333	0.671333	0.693333	0.727333	0.675	0.0140111
1 day, 0:15:09	0.771	0.72	0.747	0.764	0.786	0.822			0.679333	0.628333	0.655333	0.672333	0.694333	0.730333	0.676667	0.0141531
1 day, 0:20:09	0.771	0.72	0.749	0.766	0.786	0.823			0.679333	0.628333	0.657333	0.674333	0.694333	0.731333	0.6775	0.0141643
1 day, 0:25:09	0.772	0.721	0.749	0.766	0.786	0.823			0.680333	0.629333	0.657333	0.674333	0.694333	0.731333	0.677833	0.0140541
1 day, 0:30:09	0.774	0.724	0.75	0.767	0.786	0.824			0.682333	0.632333	0.658333	0.675333	0.694333	0.732333	0.679167	0.0137947
1 day, 0:35:09	0.775	0.725	0.751	0.768	0.787	0.826			0.683333	0.633333	0.659333	0.676333	0.695333	0.734333	0.680333	0.0139236
1 day, 0:40:09	0.776	0.727	0.752	0.77	0.789	0.827			0.684333	0.635333	0.660333	0.678333	0.697333	0.735333	0.681833	0.013839
1 day, 0:45:09	0.777	0.729	0.753	0.771	0.789	0.826			0.685333	0.637333	0.661333	0.679333	0.697333	0.734333	0.6825	0.0134323
1 day, 0:50:09	0.778	0.73	0.754	0.772	0.791	0.827			0.686333	0.638333	0.662333	0.680333	0.699333	0.735333	0.683667	0.0134701
1 day, 0:55:09	0.779	0.73	0.755	0.774	0.792	0.828			0.687333	0.638333	0.663333	0.682333	0.700333	0.736333	0.684667	0.0135761
1 day, 1:00:09	0.78	0.732	0.756	0.775	0.794	0.829			0.688333	0.640333	0.664333	0.683333	0.702333	0.737333	0.686	0.0135023
1 day, 1:05:09	0.781	0.734	0.758	0.776	0.795	0.831			0.689333	0.642333	0.666333	0.684333	0.703333	0.739333	0.6875	0.0134646
1 day, 1:10:09	0.784	0.735	0.76	0.777	0.797	0.832			0.692333	0.643333	0.668333	0.685333	0.705333	0.740333	0.689167	0.0134646
1 day, 1:15:09	0.784	0.736	0.76	0.779	0.797	0.833			0.692667	0.644667	0.668667	0.687667	0.705667	0.741667	0.690167	0.0134629
1 day, 1:20:09	0.786	0.738	0.761	0.781	0.8	0.833			0.694667	0.646667	0.669667	0.689667	0.708667	0.741667	0.691833	0.0133052
1 day, 1:25:09	0.788	0.739	0.762	0.782	0.8	0.835			0.696333	0.647333	0.670333	0.690333	0.708333	0.743333	0.692667	0.0133982
1 day, 1:30:09	0.789	0.742	0.764	0.784	0.801	0.836			0.697667	0.650667	0.672667	0.692667	0.709667	0.744667	0.694667	0.0131123
1 day, 1:35:09	0.79	0.743	0.764	0.785	0.802	0.836			0.698667	0.651667	0.672667	0.693667	0.710667	0.744667	0.695333	0.0130427
1 day, 1:40:09	0.79	0.744	0.766	0.786	0.804	0.838			0.698667	0.652667	0.674667	0.694667	0.712667	0.746667	0.696667	0.0131453
1 day, 1:45:09	0.792	0.746	0.768	0.787	0.804	0.84			0.700667	0.654667	0.676667	0.695667	0.712667	0.748667	0.698167	0.0130735
1 day, 1:50:09	0.792	0.748	0.769	0.788	0.806	0.841			0.700667	0.656667	0.677667	0.696667	0.714667	0.749667	0.699333	0.0129966
1 day, 1:55:09	0.794	0.748	0.771	0.788	0.806	0.842			0.702667	0.656667	0.679667	0.696667	0.714667	0.750667	0.700167	0.0130275
1 day, 2:00:09	0.795	0.748	0.772	0.788	0.807	0.842			0.703667	0.656667	0.680667	0.696667	0.715667	0.750667	0.700667	0.0130205
1 day, 2:05:09	0.796	0.75	0.773	0.789	0.809	0.844			0.704667	0.658667	0.681667	0.697667	0.717667	0.752667	0.702167	0.0130761
1 day, 2:10:09	0.798	0.751	0.774	0.79	0.809	0.845			0.706667	0.659667	0.682667	0.698667	0.717667	0.753667	0.703167	0.0130454
1 day, 2:15:09	0.801	0.754	0.776	0.791	0.809	0.847			0.709667	0.662667	0.684667	0.699667	0.717667	0.755667	0.705	0.0128884
1 day, 2:20:09	0.803	0.757	0.777	0.793	0.811	0.847			0.711667	0.665667	0.685667	0.701667	0.719667	0.755667	0.706667	0.0125725
1 day, 2:25:09	0.803	0.758	0.777	0.794	0.813	0.848			0.711667	0.666667	0.685667	0.702667	0.721667	0.756667	0.7075	0.0126528
1 day, 2:30:09	0.804	0.757	0.779	0.796	0.812	0.85			0.712667	0.665667	0.687667	0.704667	0.720667	0.758667	0.708333	0.0128651
1 day, 2:35:09	0.805	0.759	0.781	0.798	0.815	0.852			0.713667	0.667667	0.689667	0.706667	0.723667	0.760667	0.710333	0.0128884
1 day, 2:40:09	0.806	0.76	0.783	0.798	0.815	0.853			0.714667	0.668667	0.691667	0.706667	0.723667	0.761667	0.711167	0.0128134
1 day, 2:45:09	0.808	0.761	0.785	0.799	0.818	0.855			0.716667	0.669667	0.693667	0.707667	0.726667	0.763667	0.713	0.0129709
1 day, 2:50:09	0.809	0.763	0.786	0.801	0.819	0.854			0.717667	0.671667	0.694667	0.709667	0.727667	0.762667	0.714	0.0125875
1 day, 2:55:09	0.81	0.765	0.787	0.804	0.82	0.855			0.718667	0.673667	0.695667	0.712667	0.728667	0.763667	0.7155	0.0124564
1 day, 3:00:09	0.81	0.766	0.788	0.806	0.821	0.858			0.718667	0.674667	0.696667	0.714667	0.729667	0.766667	0.716833	0.0127028
1 day, 3:05:09	0.813	0.767	0.79	0.809	0.822	0.858			0.721667	0.675667	0.698667	0.717667	0.730667	0.766667	0.7185	0.0125258
1 day, 3:10:09	0.814	0.768	0.791	0.812	0.823	0.861			0.722667	0.676667	0.699667	0.720667	0.731667	0.769667	0.720167	0.0127821
1 day, 3:15:09	0.815	0.769	0.793	0.813	0.825	0.862			0.723667	0.677667	0.701667	0.721667	0.733667	0.770667	0.7215	0.0127604
1 day, 3:20:09	0.816	0.771	0.795	0.813	0.825	0.864			0.724667	0.679667	0.703667	0.721667	0.733667	0.772667	0.722667	0.0126965
1 day, 3:25:09	0.816	0.771	0.796	0.813	0.826	0.867			0.724667	0.679667	0.704667	0.721667	0.734667	0.775667	0.7235	0.0130727
1 day, 3:30:09	0.818	0.773	0.798	0.814	0.827	0.868			0.726667	0.681667	0.706667	0.722667	0.735667	0.776667	0.725	0.0129168
1 day, 3:35:09	0.818	0.774	0.799	0.815	0.827	0.869			0.726667	0.682667	0.707667	0.723667	0.735667	0.777667	0.725667	0.0128867
1 day, 3:40:09	0.818	0.776	0.801	0.816	0.827	0.871			0.726667	0.684667	0.709667	0.724667	0.735667	0.779667	0.726833	0.0128411
1 day, 3:45:09	0.818	0.778	0.802	0.817	0.828	0.872			0.726667	0.686667	0.710667	0.725667	0.736667	0.780667	0.727833	0.0127342
1 day, 3:50:09	0.819	0.777	0.804	0.819	0.829	0.873			0.727667	0.685667	0.712667	0.727667	0.737667	0.781667	0.728833	0.0129059
1 day, 3:55:09	0.819	0.779	0.806	0.822	0.831	0.875			0.727667	0.687667	0.714667	0.730667	0.739667	0.783667	0.730667	0.0129151
1 day, 4:00:09	0.82	0.782	0.808	0.823	0.832	0.876			0.728667	0.690667	0.716667	0.731667	0.740667	0.784667	0.732167	0.0126537
1 day, 4:05:09	0.82	0.783	0.809	0.824	0.835	0.879			0.728667	0.691667	0.717667	0.732667	0.743667	0.787667	0.733667	0.0129897
1 day, 4:10:09	0.821	0.784	0.811	0.825	0.837	0.879			0.729667	0.692667	0.719667	0.733667	0.745667	0.787667	0.734833	0.0128385
1 day, 4:15:09	0.823	0.785	0.813	0.827	0.838	0.88			0.731667	0.693667	0.721667	0.735667	0.746667	0.788667	0.736333	0.0127845
1 day, 4:20:09	0.824	0.788	0.814	0.83	0.84	0.88			0.732667	0.696667	0.722667	0.738667	0.748667	0.788667	0.738	0.0124544
1 day, 4:25:09	0.826	0.788	0.816	0.831	0.841	0.883			0.734667	0.696667	0.724667	0.739667	0.749667	0.791667	0.7395	0.0127839
1 day, 4:30:09	0.827	0.789	0.817	0.833	0.846	0.884			0.735667	0.697667	0.725667	0.741667	0.754667	0.792667	0.741333	0.0129065
1 day, 4:35:09	0.827	0.791	0.818	0.833	0.847	0.885			0.735667	0.699667	0.726667	0.741667	0.755667	0.793667	0.742167	0.0128108
1 day, 4:40:09	0.828	0.793	0.82	0.836	0.848	0.886			0.736667	0.701667	0.728667	0.744667	0.756667	0.794667	0.743833	0.0126607
1 day, 4:45:09	0.829	0.795	0.821	0.838	0.849	0.888			0.737667	0.703667	0.729667	0.746667	0.757667	0.796667	0.745333	0.0126877
1 day, 4:50:09	0.83	0.796	0.824	0.838	0.849	0.89			0.738667	0.704667	0.732667	0.746667	0.757667	0.798667	0.7465	0.0127133
1 day, 4:55:09	0.833	0.798	0.825	0.838	0.851	0.892			0.741667	0.706667	0.733667	0.746667	0.759667	0.800667	0.748167	0.0127351
1 day, 5:00:09	0.834	0.8	0.826	0.841	0.853	0.893			0.742667	0.708667	0.734667	0.749667	0.761667	0.801667	0.749833	0.0126528
1 day, 5:05:09	0.835	0.802	0.828	0.844	0.854	0.894			0.743667	0.710667	0.736667	0.752667	0.762667	0.802667	0.7515	0.0125071
1 day, 5:10:08	0.836	0.804	0.829	0.845	0.854	0.895			0.744667	0.712667	0.737667	0.753667	0.762667	0.803667	0.7525	0.0123704
1 day, 5:15:09	0.837	0.805	0.828	0.845	0.857	0.896			0.745667	0.713667	0.736667	0.753667	0.765667	0.804667	0.753333	0.0125131
1 day, 5:20:09	0.838	0.806	0.829	0.845	0.858	0.897			0.746667	0.714667	0.737667	0.753667	0.766667	0.805667	0.754167	0.0125133
1 day, 5:25:09	0.839	0.807	0.832	0.845	0.86	0.899			0.747667	0.715667	0.740667	0.753667	0.768667	0.807667	0.755667	0.0126042
1 day, 5:30:09	0.841	0.808	0.832	0.843	0.864	0.898			0.749667	0.716667	0.740667	0.751667	0.772667	0.806667	0.756333	0.0124971
1 day, 5:35:09	0.841	0.81	0.833	0.845	0.864	0.9			0.749667	0.718667	0.741667	0.753667	0.772667	0.808667	0.7575	0.0124938
1 day, 5:40:09	0.841	0.811	0.833	0.847	0.864	0.901			0.749667	0.719667	0.741667	0.755667	0.772667	0.809667	0.758167	0.0125107
1 day, 5:45:09	0.843	0.811	0.834	0.848	0.867	0.904			0.751667	0.719667	0.742667	0.756667	0.775667	0.812667	0.759833	0.0129445
1 day, 5:50:09	0.845	0.813	0.836	0.849	0.868	0.903			0.753667	0.721667	0.744667	0.757667	0.776667	0.811667	0.761	0.0125051
1 day, 5:55:09	0.846	0.816	0.838	0.85	0.87	0.904			0.754667	0.724667	0.746667	0.758667	0.778667	0.812667	0.762667	0.0122963
1 day, 6:00:09	0.848	0.817	0.838	0.85	0.871	0.904			0.756667	0.725667	0.746667	0.758667	0.779667	0.812667	0.763333	0.0121974
1 day, 6:05:09	0.849	0.817	0.839	0.851	0.872	0.904			0.757667	0.725667	0.747667	0.759667	0.780667	0.812667	0.764	0.0121674
1 day, 6:10:09	0.85	0.818	0.841	0.852	0.872	0.906			0.758667	0.726667	0.749667	0.760667	0.780667	0.814667	0.765167	0.0122141
1 day, 6:15:09	0.852	0.819	0.842	0.853	0.875	0.907			0.760667	0.727667	0.750667	0.761667	0.783667	0.815667	0.766667	0.0122855
1 day, 6:20:09	0.853	0.821	0.844	0.854	0.876	0.906			0.761667	0.729667	0.752667	0.762667	0.784667	0.814667	0.767667	0.0118715
1 day, 6:25:09	0.854	0.822	0.845	0.855	0.878	0.907			0.762667	0.730667	0.753667	0.763667	0.786667	0.815667	0.768833	0.0119203
1 day, 6:30:09	0.854	0.823	0.846	0.857	0.879	0.907			0.762667	0.731667	0.754667	0.765667	0.787667	0.815667	0.769667	0.0117955
1 day, 6:35:09	0.855	0.826	0.847	0.857	0.88	0.909			0.763667	0.734667	0.755667	0.765667	0.788667	0.817667	0.771	0.0117294
1 day, 6:40:09	0.857	0.828	0.849	0.858	0.884	0.91			0.765667	0.736667	0.757667	0.766667	0.792667	0.818667	0.773	0.0117208
1 day, 6:45:09	0.856	0.829	0.849	0.858	0.884	0.91			0.764667	0.737667	0.757667	0.766667	0.792667	0.818667	0.773	0.0116409
1 day, 6:50:09	0.857	0.83	0.851	0.859	0.885	0.911			0.765667	0.738667	0.759667	0.767667	0.793667	0.819667	0.774167	0.0115981
1 day, 6:55:09	0.858	0.83	0.853	0.859	0.888	0.912			0.766667	0.738667	0.761667	0.767667	0.796667	0.820667	0.775333	0.0117974
1 day, 7:00:09	0.859	0.832	0.853	0.859	0.889	0.913			0.767667	0.740667	0.761667	0.767667	0.797667	0.821667	0.776167	0.011758
1 day, 7:05:09	0.859	0.832	0.855	0.86	0.89	0.914			0.767667	0.740667	0.763667	0.768667	0.798667	0.822667	0.777	0.0118453
1 day, 7:10:09	0.861	0.833	0.856	0.858	0.89	0.914			0.769667	0.741667	0.764667	0.766667	0.798667	0.822667	0.777333	0.0117123
1 day, 7:15:09	0.862	0.835	0.856	0.86	0.892	0.916			0.770667	0.743667	0.764667	0.768667	0.800667	0.824667	0.778833	0.0118108
1 day, 7:20:09	0.863	0.836	0.858	0.863	0.893	0.917			0.771667	0.744667	0.766667	0.771667	0.801667	0.825667	0.780333	0.011718
1 day, 7:25:09	0.865	0.836	0.858	0.864	0.893	0.917			0.773667	0.744667	0.766667	0.772667	0.801667	0.825667	0.780833	0.0116488
1 day, 7:30:09	0.866	0.838	0.858	0.864	0.894	0.918			0.774667	0.746667	0.766667	0.772667	0.802667	0.826667	0.781667	0.0116132
1 day, 7:35:09	0.867	0.837	0.86	0.865	0.896	0.919			0.775667	0.745667	0.768667	0.773667	0.804667	0.827667	0.782667	0.0118378
1 day, 7:40:09	0.867	0.836	0.861	0.867	0.897	0.919			0.775667	0.744667	0.769667	0.775667	0.805667	0.827667	0.783167	0.0119213
1 day, 7:45:09	0.866	0.838	0.861	0.869	0.897	0.92			0.774667	0.746667	0.769667	0.777667	0.805667	0.828667	0.783833	0.0118192
1 day, 7:50:09	0.867	0.839	0.862	0.87	0.9	0.922			0.775667	0.747667	0.770667	0.778667	0.808667	0.830667	0.785333	0.0120711
1 day, 7:55:09	0.867	0.841	0.862	0.868	0.903	0.922			0.775667	0.749667	0.770667	0.776667	0.811667	0.830667	0.785833	0.0121145
1 day, 8:00:09	0.869	0.842	0.863	0.869	0.905	0.922			0.777667	0.750667	0.771667	0.777667	0.813667	0.830667	0.787	0.0120379
1 day, 8:05:09	0.869	0.843	0.865	0.869	0.906	0.923			0.777667	0.751667	0.773667	0.777667	0.814667	0.831667	0.787833	0.012051
1 day, 8:10:09	0.87	0.842	0.863	0.871	0.907	0.924			0.778667	0.750667	0.771667	0.779667	0.815667	0.832667	0.788167	0.0123525
1 day, 8:15:09	0.871	0.841	0.866	0.872	0.907	0.925			0.779667	0.749667	0.774667	0.780667	0.815667	0.833667	0.789	0.0124034
1 day, 8:20:09	0.872	0.841	0.868	0.873	0.908	0.926			0.780667	0.749667	0.776667	0.781667	0.816667	0.834667	0.79	0.0124731
1 day, 8:25:09	0.871	0.841	0.865	0.874	0.909	0.926			0.779667	0.749667	0.773667	0.782667	0.817667	0.834667	0.789667	0.0126675
1 day, 8:30:09	0.872	0.844	0.868	0.874	0.91	0.928			0.780667	0.752667	0.776667	0.782667	0.818667	0.836667	0.791333	0.0125184
1 day, 8:35:09	0.872	0.845	0.872	0.874	0.912	0.927			0.780667	0.753667	0.780667	0.782667	0.820667	0.835667	0.792333	0.0123036
1 day, 8:40:09	0.873	0.847	0.87	0.874	0.911	0.927			0.781667	0.755667	0.778667	0.782667	0.819667	0.835667	0.792333	0.01206
1 day, 8:45:09	0.875	0.847	0.87	0.874	0.912	0.927			0.783667	0.755667	0.778667	0.782667	0.820667	0.835667	0.792833	0.0120814
1 day, 8:50:09	0.875	0.847	0.871	0.875	0.913	0.928			0.783667	0.755667	0.779667	0.783667	0.821667	0.836667	0.7935	0.0122104
1 day, 8:55:09	0.876	0.846	0.873	0.877	0.914	0.929			0.784667	0.754667	0.781667	0.785667	0.822667	0.837667	0.7945	0.0123597
1 day, 9:00:09	0.878	0.847	0.873	0.878	0.916	0.929			0.786667	0.755667	0.781667	0.786667	0.824667	0.837667	0.7955	0.0123327
1 day, 9:05:09	0.879	0.849	0.875	0.879	0.917	0.93			0.787667	0.757667	0.783667	0.787667	0.825667	0.838667	0.796833	0.0121886
1 day, 9:10:09	0.88	0.85	0.873	0.879	0.918	0.93			0.788667	0.758667	0.781667	0.787667	0.826667	0.838667	0.797	0.0122166
1 day, 9:15:09	0.88	0.849	0.875	0.88	0.918	0.93			0.788667	0.757667	0.783667	0.788667	0.826667	0.838667	0.797333	0.0122193
1 day, 9:20:09	0.882	0.85	0.876	0.881	0.921	0.931			0.790667	0.758667	0.784667	0.789667	0.829667	0.839667	0.798833	0.0123597
1 day, 9:25:09	0.882	0.85	0.875	0.883	0.921	0.931			0.791	0.759	0.784	0.792	0.83	0.84	0.799333	0.0123549
1 day, 9:30:09	0.882	0.852	0.877	0.885	0.922	0.932			0.790667	0.760667	0.785667	0.793667	0.830667	0.840667	0.800333	0.0122111
1 day, 9:35:09	0.884	0.853	0.878	0.886	0.922	0.932			0.792667	0.761667	0.786667	0.794667	0.830667	0.840667	0.801167	0.0119937
1 day, 9:40:09	0.884	0.854	0.876	0.888	0.923	0.933			0.792667	0.762667	0.784667	0.796667	0.831667	0.841667	0.801667	0.0121326
1 day, 9:45:09	0.884	0.854	0.877	0.888	0.924	0.934			0.793333	0.763333	0.786333	0.797333	0.833333	0.843333	0.802833	0.0122794
1 day, 9:50:09	0.885	0.854	0.881	0.889	0.925	0.934			0.793667	0.762667	0.789667	0.797667	0.833667	0.842667	0.803333	0.0121564
1 day, 9:55:09	0.886	0.854	0.879	0.889	0.925	0.934			0.795	0.763	0.788	0.798	0.834	0.843	0.8035	0.0122113
1 day, 10:00:09	0.885	0.855	0.875	0.889	0.926	0.935			0.794	0.764	0.784	0.798	0.835	0.844	0.803167	0.0125071
1 day, 10:05:09	0.886	0.856	0.881	0.891	0.927	0.936			0.795	0.765	0.79	0.8	0.836	0.845	0.805167	0.0122622
1 day, 10:10:09	0.887	0.857	0.884	0.893	0.927	0.937			0.796	0.766	0.793	0.802	0.836	0.846	0.8065	0.0120879
1 day, 10:15:09	0.888	0.856	0.882	0.895	0.927	0.936			0.797	0.765	0.791	0.804	0.836	0.845	0.806333	0.0121262
1 day, 10:20:09	0.888	0.855	0.88	0.898	0.928	0.938			0.797	0.764	0.789	0.807	0.837	0.847	0.806833	0.0126133
1 day, 10:25:09	0.888	0.856	0.883	0.898	0.929	0.937			0.796667	0.764667	0.791667	0.806667	0.837667	0.845667	0.807167	0.0123417
1 day, 10:30:09	0.888	0.858	0.885	0.898	0.931	0.938			0.796667	0.766667	0.793667	0.806667	0.839667	0.846667	0.808333	0.0123036
1 day, 10:35:09	0.888	0.857	0.882	0.898	0.931	0.939			0.797	0.766	0.791	0.807	0.84	0.848	0.808167	0.0126476
1 day, 10:40:09	0.887	0.858	0.884	0.899	0.933	0.94			0.796	0.767	0.793	0.808	0.842	0.849	0.809167	0.0127526
1 day, 10:45:09	0.887	0.86	0.884	0.9	0.932	0.94			0.795667	0.768667	0.792667	0.808667	0.840667	0.848667	0.809167	0.0124466
1 day, 10:50:09	0.887	0.859	0.886	0.901	0.932	0.939			0.796	0.768	0.795	0.81	0.841	0.848	0.809667	0.0123684
1 day, 10:55:09	0.887	0.86	0.886	0.902	0.933	0.94			0.796333	0.769333	0.795333	0.811333	0.842333	0.849333	0.810667	0.0124463
1 day, 11:00:09	0.887	0.86	0.885	0.904	0.934	0.941			0.796333	0.769333	0.794333	0.813333	0.843333	0.850333	0.811167	0.0126844
1 day, 11:05:09	0.887	0.861	0.884	0.904	0.934	0.943			0.796333	0.770333	0.793333	0.813333	0.843333	0.852333	0.8115	0.0128307
1 day, 11:10:09	0.888	0.863	0.889	0.905	0.934	0.943			0.797	0.772	0.798	0.814	0.843	0.852	0.812667	0.0123603
1 day, 11:15:09	0.891	0.862	0.887	0.906	0.935	0.944			0.800333	0.771333	0.796333	0.815333	0.844333	0.853333	0.8135	0.0126318
1 day, 11:20:09	0.892	0.863	0.888	0.907	0.935	0.945			0.801333	0.772333	0.797333	0.816333	0.844333	0.854333	0.814333	0.0125512
1 day, 11:25:09	0.893	0.862	0.888	0.909	0.937	0.943			0.802333	0.771333	0.797333	0.818333	0.846333	0.852333	0.814667	0.0126034
1 day, 11:30:09	0.894	0.866	0.889	0.908	0.939	0.944			0.803	0.775	0.798	0.817	0.848	0.853	0.815667	0.0123387
1 day, 11:35:09	0.895	0.867	0.889	0.909	0.938	0.944			0.804333	0.776333	0.798333	0.818333	0.847333	0.853333	0.816333	0.0121134
1 day, 11:40:09	0.894	0.866	0.891	0.909	0.94	0.946			0.803333	0.775333	0.800333	0.818333	0.849333	0.855333	0.817	0.0125397
1 day, 11:45:09	0.894	0.866	0.892	0.911	0.941	0.947			0.803	0.775	0.801	0.82	0.85	0.856	0.8175	0.0126932
1 day, 11:50:09	0.894	0.868	0.892	0.911	0.941	0.946			0.803333	0.777333	0.801333	0.820333	0.850333	0.855333	0.818	0.0123711
1 day, 11:55:09	0.894	0.867	0.892	0.911	0.94	0.946			0.803333	0.776333	0.801333	0.820333	0.849333	0.855333	0.817667	0.0123953
1 day, 12:00:09	0.895	0.866	0.893	0.913	0.941	0.947			0.804333	0.775333	0.802333	0.822333	0.850333	0.856333	0.8185	0.0126291
1 day, 12:05:09	0.894	0.87	0.894	0.913	0.942	0.946			0.803333	0.779333	0.803333	0.822333	0.851333	0.855333	0.819167	0.0121667
1 day, 12:10:09	0.895	0.872	0.895	0.914	0.942	0.946			0.804333	0.781333	0.804333	0.823333	0.851333	0.855333	0.82	0.0118706
1 day, 12:15:09	0.896	0.87	0.896	0.913	0.943	0.947			0.805333	0.779333	0.805333	0.822333	0.852333	0.856333	0.820167	0.0121858
1 day, 12:20:09	0.897	0.871	0.897	0.913	0.941	0.947			0.806333	0.780333	0.806333	0.822333	0.850333	0.856333	0.820333	0.0118209
1 day, 12:25:09	0.897	0.871	0.897	0.913	0.944	0.948			0.806333	0.780333	0.806333	0.822333	0.853333	0.857333	0.821	0.012181
1 day, 12:30:09	0.899	0.874	0.899	0.914	0.944	0.949			0.808333	0.783333	0.808333	0.823333	0.853333	0.858333	0.8225	0.011791
1 day, 12:35:09	0.898	0.874	0.899	0.914	0.943	0.95			0.807333	0.783333	0.808333	0.823333	0.852333	0.859333	0.822333	0.0118491
1 day, 12:40:09	0.899	0.875	0.9	0.916	0.944	0.95			0.808333	0.784333	0.809333	0.825333	0.853333	0.859333	0.823333	0.0117502
1 day, 12:45:09	0.9	0.875	0.901	0.919	0.942	0.95			0.809333	0.784333	0.810333	0.828333	0.851333	0.859333	0.823833	0.0115318
1 day, 12:50:09	0.902	0.876	0.902	0.919	0.943	0.95			0.811333	0.785333	0.811333	0.828333	0.852333	0.859333	0.824667	0.0113774
1 day, 12:55:09	0.904	0.876	0.901	0.918	0.945	0.95			0.813333	0.785333	0.810333	0.827333	0.854333	0.859333	0.825	0.0115027
1 day, 13:00:09	0.905	0.875	0.902	0.918	0.945	0.951			0.814333	0.784333	0.811333	0.827333	0.854333	0.860333	0.825333	0.0116447
1 day, 13:05:09	0.906	0.878	0.903	0.92	0.944	0.951			0.815333	0.787333	0.812333	0.829333	0.853333	0.860333	0.826333	0.0111535
1 day, 13:10:09	0.907	0.877	0.903	0.92	0.944	0.951			0.816667	0.786667	0.812667	0.829667	0.853667	0.860667	0.826667	0.0112398
1 day, 13:15:09	0.908	0.879	0.903	0.921	0.946	0.951			0.817333	0.788333	0.812333	0.830333	0.855333	0.860333	0.827333	0.0111475
1 day, 13:20:09	0.909	0.879	0.905	0.923	0.948	0.952			0.818	0.788	0.814	0.832	0.857	0.861	0.828333	0.0113157
1 day, 13:25:09	0.909	0.879	0.906	0.923	0.947	0.953			0.818333	0.788333	0.815333	0.832333	0.856333	0.862333	0.828833	0.0112894
1 day, 13:30:09	0.908	0.879	0.906	0.926	0.945	0.953			0.817333	0.788333	0.815333	0.835333	0.854333	0.862333	0.828833	0.0112094
1 day, 13:35:09	0.909	0.881	0.906	0.925	0.946	0.953			0.818333	0.790333	0.815333	0.834333	0.855333	0.862333	0.829333	0.010997
1 day, 13:40:09	0.91	0.881	0.908	0.925	0.948	0.954			0.819333	0.790333	0.817333	0.834333	0.857333	0.863333	0.830333	0.0111415
1 day, 13:45:09	0.91	0.882	0.909	0.926	0.95	0.954			0.819333	0.791333	0.818333	0.835333	0.859333	0.863333	0.831167	0.0111607
1 day, 13:50:09	0.911	0.883	0.909	0.926	0.949	0.954			0.820333	0.792333	0.818333	0.835333	0.858333	0.863333	0.831333	0.010924
1 day, 13:55:09	0.91	0.882	0.91	0.926	0.946	0.954			0.819667	0.791667	0.819667	0.835667	0.855667	0.863667	0.831	0.0108033
1 day, 14:00:09	0.91	0.883	0.911	0.929	0.948	0.956			0.819667	0.792667	0.820667	0.838667	0.857667	0.865667	0.8325	0.0110496
1 day, 14:05:09	0.91	0.881	0.912	0.929	0.952	0.956			0.819333	0.790333	0.821333	0.838333	0.861333	0.865333	0.832667	0.0115749
1 day, 14:10:09	0.91	0.884	0.911	0.931	0.953	0.955			0.819333	0.793333	0.820333	0.840333	0.862333	0.864333	0.833333	0.0112783
1 day, 14:15:09	0.911	0.885	0.912	0.932	0.952	0.955			0.820667	0.794667	0.821667	0.841667	0.861667	0.864667	0.834167	0.0110174
1 day, 14:20:09	0.911	0.884	0.912	0.932	0.95	0.955			0.820333	0.793333	0.821333	0.841333	0.859333	0.864333	0.833333	0.0109757
1 day, 14:25:09	0.912	0.883	0.914	0.931	0.952	0.956			0.821333	0.792333	0.823333	0.840333	0.861333	0.865333	0.834	0.011224
1 day, 14:30:09	0.912	0.886	0.914	0.931	0.952	0.956			0.821667	0.795667	0.823667	0.840667	0.861667	0.865667	0.834833	0.0108579
1 day, 14:35:09	0.913	0.887	0.915	0.93	0.952	0.955			0.822333	0.796333	0.824333	0.839333	0.861333	0.864333	0.834667	0.0105536
1 day, 14:40:09	0.913	0.887	0.915	0.935	0.952	0.956			0.822333	0.796333	0.824333	0.844333	0.861333	0.865333	0.835667	0.0107507
1 day, 14:45:09	0.913	0.888	0.915	0.939	0.953	0.956			0.822333	0.797333	0.824333	0.848333	0.862333	0.865333	0.836667	0.0108341
1 day, 14:50:09	0.914	0.887	0.916	0.939	0.955	0.957			0.823667	0.796667	0.825667	0.848667	0.864667	0.866667	0.837667	0.0111235
1 day, 14:55:09	0.914	0.887	0.917	0.939	0.956	0.956			0.823333	0.796333	0.826333	0.848333	0.865333	0.865333	0.8375	0.0110858
1 day, 15:00:09	0.913	0.887	0.917	0.937	0.955	0.957			0.822667	0.796667	0.826667	0.846667	0.864667	0.866667	0.837333	0.0110715
1 day, 15:05:09	0.913	0.887	0.916	0.936	0.955	0.956			0.822667	0.796667	0.825667	0.845667	0.864667	0.865667	0.836833	0.0109891
1 day, 15:10:09	0.914	0.886	0.917	0.936	0.957	0.957			0.823333	0.795333	0.826333	0.845333	0.866333	0.866333	0.837167	0.0112943
1 day, 15:15:09	0.914	0.89	0.919	0.935	0.957	0.958			0.823333	0.799333	0.828333	0.844333	0.866333	0.867333	0.838167	0.0108118
1 day, 15:20:09	0.915	0.89	0.918	0.936	0.956	0.958			0.824333	0.799333	0.827333	0.845333	0.865333	0.867333	0.838167	0.0107344
1 day, 15:25:09	0.915	0.889	0.92	0.937	0.957	0.958			0.824333	0.798333	0.829333	0.846333	0.866333	0.867333	0.838667	0.0109016
1 day, 15:30:09	0.915	0.891	0.921	0.94	0.958	0.958			0.824333	0.800333	0.830333	0.849333	0.867333	0.867333	0.839833	0.0107912
1 day, 15:35:09	0.916	0.892	0.921	0.939	0.96	0.959			0.825333	0.801333	0.830333	0.848333	0.869333	0.868333	0.8405	0.0108549
1 day, 15:40:09	0.917	0.892	0.921	0.938	0.961	0.959			0.826333	0.801333	0.830333	0.847333	0.870333	0.868333	0.840667	0.0108771
1 day, 15:45:09	0.916	0.892	0.921	0.939	0.961	0.96			0.825667	0.801667	0.830667	0.848667	0.870667	0.869667	0.841167	0.0110295
1 day, 15:50:09	0.917	0.893	0.922	0.939	0.961	0.959			0.826333	0.802333	0.831333	0.848333	0.870333	0.868333	0.841167	0.0107468
1 day, 15:55:09	0.916	0.893	0.921	0.94	0.962	0.96			0.825333	0.802333	0.830333	0.849333	0.871333	0.869333	0.841333	0.0110242
1 day, 16:00:09	0.917	0.894	0.92	0.941	0.961	0.96			0.826667	0.803667	0.829667	0.850667	0.870667	0.869667	0.841833	0.0108303
1 day, 16:05:09	0.916	0.894	0.922	0.942	0.962	0.96			0.825333	0.803333	0.831333	0.851333	0.871333	0.869333	0.842	0.010926
1 day, 16:10:09	0.918	0.894	0.922	0.943	0.963	0.96			0.827667	0.803667	0.831667	0.852667	0.872667	0.869667	0.843	0.0109473
1 day, 16:15:09	0.916	0.894	0.922	0.941	0.964	0.96			0.825333	0.803333	0.831333	0.850333	0.873333	0.869333	0.842167	0.0110828
1 day, 16:20:09	0.918	0.893	0.923	0.941	0.964	0.961			0.827333	0.802333	0.832333	0.850333	0.873333	0.870333	0.842667	0.0111555
1 day, 16:25:09	0.916	0.895	0.923	0.941	0.964	0.959			0.825667	0.804667	0.832667	0.850667	0.873667	0.868667	0.842667	0.0108536
1 day, 16:30:09	0.918	0.895	0.922	0.944	0.964	0.96			0.827667	0.804667	0.831667	0.853667	0.873667	0.869667	0.8435	0.0109496
1 day, 16:35:09	0.918	0.896	0.925	0.948	0.965	0.961			0.827333	0.805333	0.834333	0.857333	0.874333	0.870333	0.844833	0.0110355
1 day, 16:40:09	0.918	0.895	0.924	0.949	0.965	0.961			0.827333	0.804333	0.833333	0.858333	0.874333	0.870333	0.844667	0.011227
1 day, 16:45:09	0.919	0.897	0.924	0.949	0.965	0.961			0.828667	0.806667	0.833667	0.858667	0.874667	0.870667	0.8455	0.0109374
1 day, 16:50:09	0.919	0.898	0.926	0.948	0.966	0.961			0.828667	0.807667	0.835667	0.857667	0.875667	0.870667	0.846	0.0108033
1 day, 16:55:09	0.919	0.897	0.926	0.946	0.967	0.96			0.828333	0.806333	0.835333	0.855333	0.876333	0.869333	0.845167	0.0108733
1 day, 17:00:09	0.919	0.899	0.927	0.947	0.967	0.961			0.828667	0.808667	0.836667	0.856667	0.876667	0.870667	0.846333	0.0107134
1 day, 17:05:09	0.92	0.899	0.927	0.947	0.966	0.962			0.829667	0.808667	0.836667	0.856667	0.875667	0.871667	0.8465	0.010644
1 day, 17:10:09	0.922	0.9	0.927	0.948	0.965	0.961			0.831333	0.809333	0.836333	0.857333	0.874333	0.870333	0.8465	0.0102873
1 day, 17:15:09	0.921	0.899	0.927	0.949	0.966	0.96			0.830667	0.808667	0.836667	0.858667	0.875667	0.869667	0.846667	0.0105103
1 day, 17:20:09	0.921	0.899	0.927	0.949	0.968	0.961			0.830333	0.808333	0.836333	0.858333	0.877333	0.870333	0.846833	0.0107696
1 day, 17:25:09	0.921	0.901	0.928	0.948	0.967	0.96			0.830667	0.810667	0.837667	0.857667	0.876667	0.869667	0.847167	0.0102981
1 day, 17:30:09	0.921	0.9	0.929	0.948	0.967	0.961			0.830333	0.809333	0.838333	0.857333	0.876333	0.870333	0.847	0.0104616
1 day, 17:35:09	0.92	0.9	0.93	0.948	0.968	0.96			0.829667	0.809667	0.839667	0.857667	0.877667	0.869667	0.847333	0.0105124
1 day, 17:40:09	0.921	0.9	0.93	0.95	0.97	0.96			0.830667	0.809667	0.839667	0.859667	0.879667	0.869667	0.848167	0.0107199
1 day, 17:45:09	0.921	0.9	0.93	0.951	0.97	0.961			0.830667	0.809667	0.839667	0.860667	0.879667	0.870667	0.8485	0.0108241
1 day, 17:50:09	0.921	0.902	0.931	0.951	0.971	0.961			0.830333	0.811333	0.840333	0.860333	0.880333	0.870333	0.848833	0.0106575
1 day, 17:55:09	0.922	0.902	0.932	0.951	0.971	0.959			0.831333	0.811333	0.841333	0.860333	0.880333	0.868333	0.848833	0.0104459
1 day, 18:00:09	0.922	0.902	0.932	0.952	0.972	0.959			0.832	0.812	0.842	0.862	0.882	0.869	0.849833	0.0105843
1 day, 18:05:09	0.923	0.903	0.932	0.953	0.973	0.959			0.832667	0.812667	0.841667	0.862667	0.882667	0.868667	0.850167	0.0105507
1 day, 18:10:09	0.922	0.904	0.932	0.952	0.972	0.96			0.831667	0.813667	0.841667	0.861667	0.881667	0.869667	0.85	0.0104105
1 day, 18:15:09	0.922	0.903	0.932	0.953	0.973	0.96			0.831333	0.812333	0.841333	0.862333	0.882333	0.869333	0.849833	0.0106669
1 day, 18:20:09	0.921	0.904	0.932	0.956	0.974	0.959			0.830667	0.813667	0.841667	0.865667	0.883667	0.868667	0.850667	0.0107827
1 day, 18:25:09	0.922	0.905	0.933	0.958	0.975	0.958			0.832	0.815	0.843	0.868	0.885	0.868	0.851833	0.0107251
1 day, 18:30:09	0.922	0.905	0.934	0.959	0.975	0.957			0.831667	0.814667	0.843667	0.868667	0.884667	0.866667	0.851667	0.010702
1 day, 18:35:09	0.922	0.905	0.935	0.959	0.974	0.958			0.831667	0.814667	0.844667	0.868667	0.883667	0.867667	0.851833	0.0106252
1 day, 18:40:09	0.923	0.907	0.935	0.959	0.975	0.958			0.832333	0.816333	0.844333	0.868333	0.884333	0.867333	0.852167	0.0104321
1 day, 18:45:09	0.921	0.909	0.936	0.96	0.976	0.957			0.830333	0.818333	0.845333	0.869333	0.885333	0.866333	0.8525	0.0104289
1 day, 18:50:09	0.922	0.909	0.937	0.96	0.975	0.957			0.831333	0.818333	0.846333	0.869333	0.884333	0.866333	0.852667	0.0102328
1 day, 18:55:09	0.923	0.91	0.937	0.961	0.974	0.957			0.832667	0.819667	0.846667	0.870667	0.883667	0.866667	0.853333	0.0100056
1 day, 19:00:09	0.923	0.911	0.938	0.961	0.974	0.957			0.832333	0.820333	0.847333	0.870333	0.883333	0.866333	0.853333	0.00987252
1 day, 19:05:09	0.924	0.911	0.938	0.961	0.975	0.957			0.833333	0.820333	0.847333	0.870333	0.884333	0.866333	0.853667	0.00990511
1 day, 19:10:09	0.923	0.913	0.938	0.962	0.977	0.956			0.832667	0.822667	0.847667	0.871667	0.886667	0.865667	0.8545	0.00998471
1 day, 19:15:09	0.924	0.913	0.939	0.963	0.977	0.958			0.833667	0.822667	0.848667	0.872667	0.886667	0.867667	0.855333	0.0100255
1 day, 19:20:09	0.923	0.914	0.94	0.964	0.977	0.958			0.832667	0.823667	0.849667	0.873667	0.886667	0.867667	0.855667	0.01003
1 day, 19:25:09	0.924	0.914	0.94	0.966	0.979	0.956			0.833333	0.823333	0.849333	0.875333	0.888333	0.865333	0.855833	0.0102168
1 day, 19:30:09	0.925	0.914	0.94	0.966	0.979	0.956			0.834667	0.823667	0.849667	0.875667	0.888667	0.865667	0.856333	0.0101445
1 day, 19:35:09	0.925	0.915	0.941	0.968	0.98	0.957			0.834667	0.824667	0.850667	0.877667	0.889667	0.866667	0.857333	0.0102816
1 day, 19:40:09	0.925	0.914	0.941	0.971	0.98	0.957			0.834667	0.823667	0.850667	0.880667	0.889667	0.866667	0.857667	0.0105956
1 day, 19:45:09	0.925	0.915	0.942	0.972	0.981	0.956			0.835	0.825	0.852	0.882	0.891	0.866	0.8585	0.0106168
1 day, 19:50:09	0.926	0.916	0.942	0.974	0.983	0.956			0.835333	0.825333	0.851333	0.883333	0.892333	0.865333	0.858833	0.0107943
1 day, 19:55:09	0.925	0.916	0.941	0.974	0.983	0.956			0.834667	0.825667	0.850667	0.883667	0.892667	0.865667	0.858833	0.0108916
1 day, 20:00:09	0.926	0.917	0.942	0.976	0.984	0.957			0.835333	0.826333	0.851333	0.885333	0.893333	0.866333	0.859667	0.0109686
1 day, 20:05:09	0.926	0.916	0.943	0.977	0.985	0.956			0.835667	0.825667	0.852667	0.886667	0.894667	0.865667	0.860167	0.0112094
1 day, 20:10:09	0.927	0.918	0.943	0.977	0.984	0.956			0.836333	0.827333	0.852333	0.886333	0.893333	0.865333	0.860167	0.0108303
1 day, 20:15:09	0.927	0.919	0.943	0.978	0.985	0.956			0.836667	0.828667	0.852667	0.887667	0.894667	0.865667	0.861	0.0109138
1 day, 20:20:09	0.927	0.918	0.943	0.978	0.985	0.956			0.836333	0.827333	0.852333	0.887333	0.894333	0.865333	0.8605	0.0110134
1 day, 20:25:09	0.929	0.92	0.945	0.98	0.986	0.957			0.838667	0.829667	0.854667	0.889667	0.895667	0.866667	0.8625	0.0108978
1 day, 20:30:09	0.928	0.921	0.944	0.98	0.986	0.955			0.838	0.831	0.854	0.89	0.896	0.865	0.862333	0.0108771
1 day, 20:35:09	0.929	0.921	0.945	0.98	0.987	0.955			0.838667	0.830667	0.854667	0.889667	0.896667	0.864667	0.8625	0.0108825
1 day, 20:40:09	0.929	0.921	0.946	0.981	0.987	0.956			0.838667	0.830667	0.855667	0.890667	0.896667	0.865667	0.863	0.0109504
1 day, 20:45:09	0.929	0.921	0.947	0.981	0.988	0.956			0.838333	0.830333	0.856333	0.890333	0.897333	0.865333	0.863	0.0110323
1 day, 20:50:09	0.928	0.921	0.948	0.981	0.988	0.955			0.837667	0.830667	0.857667	0.890667	0.897667	0.864667	0.863167	0.0110838
1 day, 20:55:09	0.927	0.922	0.949	0.982	0.988	0.955			0.837	0.832	0.859	0.892	0.898	0.865	0.863833	0.0111338
1 day, 21:00:09	0.928	0.922	0.949	0.983	0.989	0.955			0.838	0.832	0.859	0.893	0.899	0.865	0.864333	0.0112418
1 day, 21:05:09	0.928	0.923	0.948	0.983	0.989	0.955			0.837333	0.832333	0.857333	0.892333	0.898333	0.864333	0.863667	0.0111644
1 day, 21:10:09	0.929	0.924	0.949	0.983	0.99	0.955			0.838333	0.833333	0.858333	0.892333	0.899333	0.864333	0.864333	0.0110785
1 day, 21:15:09	0.93	0.925	0.95	0.984	0.99	0.954			0.839667	0.834667	0.859667	0.893667	0.899667	0.863667	0.865167	0.010978
1 day, 21:20:09	0.931	0.926	0.95	0.985	0.989	0.955			0.840667	0.835667	0.859667	0.894667	0.898667	0.864667	0.865667	0.0107889
1 day, 21:25:09	0.931	0.926	0.951	0.986	0.989	0.956			0.841	0.836	0.861	0.896	0.899	0.866	0.8665	0.0108589
1 day, 21:30:09	0.932	0.926	0.951	0.986	0.992	0.955			0.841667	0.835667	0.860667	0.895667	0.901667	0.864667	0.866667	0.0110935
1 day, 21:35:09	0.932	0.928	0.952	0.987	0.992	0.955			0.842	0.838	0.862	0.897	0.902	0.865	0.867667	0.0109808
1 day, 21:40:09	0.932	0.928	0.953	0.988	0.992	0.954			0.841667	0.837667	0.862667	0.897667	0.901667	0.863667	0.8675	0.0110647
1 day, 21:45:09	0.933	0.928	0.954	0.987	0.992	0.954			0.843	0.838	0.864	0.897	0.902	0.864	0.868	0.0108842
1 day, 21:50:09	0.933	0.928	0.954	0.987	0.993	0.955			0.842667	0.837667	0.863667	0.896667	0.902667	0.864667	0.868	0.0109778
1 day, 21:55:09	0.934	0.93	0.955	0.988	0.993	0.954			0.843667	0.839667	0.864667	0.897667	0.902667	0.863667	0.868667	0.0108074
1 day, 22:00:09	0.934	0.93	0.955	0.988	0.993	0.953			0.843667	0.839667	0.864667	0.897667	0.902667	0.862667	0.8685	0.0108241
1 day, 22:05:09	0.933	0.931	0.957	0.989	0.993	0.955			0.843	0.841	0.867	0.899	0.903	0.865	0.869667	0.0108525
1 day, 22:10:09	0.933	0.931	0.958	0.991	0.994	0.955			0.842333	0.840333	0.867333	0.900333	0.903333	0.864333	0.869667	0.0111285
1 day, 22:15:09	0.932	0.931	0.958	0.992	0.994	0.954			0.841667	0.840667	0.867667	0.901667	0.903667	0.863667	0.869833	0.0113208
1 day, 22:20:09	0.933	0.931	0.958	0.993	0.994	0.953			0.843	0.841	0.868	0.903	0.904	0.863	0.870333	0.0113539
1 day, 22:25:09	0.934	0.932	0.959	0.993	0.994	0.954			0.843667	0.841667	0.868667	0.902667	0.903667	0.863667	0.870667	0.0111595
1 day, 22:30:09	0.934	0.931	0.959	0.994	0.996	0.953			0.844	0.841	0.869	0.904	0.906	0.863	0.871167	0.0115626
1 day, 22:35:09	0.935	0.933	0.961	0.995	0.995	0.953			0.845	0.843	0.871	0.905	0.905	0.863	0.872	0.011299
1 day, 22:40:09	0.935	0.933	0.961	0.995	0.996	0.954			0.845	0.843	0.871	0.905	0.906	0.864	0.872333	0.0113715
1 day, 22:45:09	0.936	0.934	0.962	0.995	0.997	0.953			0.845667	0.843667	0.871667	0.904667	0.906667	0.862667	0.8725	0.0113297
1 day, 22:50:09	0.936	0.934	0.963	0.994	0.996	0.954			0.846	0.844	0.873	0.904	0.906	0.864	0.872833	0.0111068
1 day, 22:55:09	0.937	0.934	0.963	0.995	0.996	0.953			0.847	0.844	0.873	0.905	0.906	0.863	0.873	0.0111505
1 day, 23:00:08	0.937	0.935	0.963	0.996	0.997	0.955			0.846333	0.844333	0.872333	0.905333	0.906333	0.864333	0.873167	0.0112024
1 day, 23:05:09	0.938	0.936	0.964	0.996	0.998	0.955			0.847667	0.845667	0.873667	0.905667	0.907667	0.864667	0.874167	0.0111348
1 day, 23:10:09	0.937	0.935	0.965	0.996	0.999	0.956			0.847	0.845	0.875	0.906	0.909	0.866	0.874667	0.0113744
1 day, 23:15:09	0.937	0.937	0.965	0.997	0.998	0.956			0.846667	0.846667	0.874667	0.906667	0.907667	0.865667	0.874667	0.0111982
1 day, 23:20:09	0.938	0.937	0.966	0.997	0.999	0.956			0.848	0.847	0.876	0.907	0.909	0.866	0.8755	0.0112153
1 day, 23:25:09	0.939	0.939	0.965	0.999	0.999	0.957			0.848667	0.848667	0.874667	0.908667	0.908667	0.866667	0.876	0.0111315
1 day, 23:30:09	0.939	0.939	0.967	1	0.999	0.958			0.849	0.849	0.877	0.91	0.909	0.868	0.877	0.0111982
1 day, 23:35:09	0.94	0.939	0.967	1	0.999	0.958			0.849667	0.848667	0.876667	0.909667	0.908667	0.867667	0.876833	0.0111158
1 day, 23:40:09	0.941	0.939	0.968	1	1	0.959			0.850667	0.848667	0.877667	0.909667	0.909667	0.868667	0.8775	0.0111038
1 day, 23:45:09	0.943	0.939	0.969	1.001	1.001	0.959			0.852333	0.848333	0.878333	0.910333	0.910333	0.868333	0.878	0.0111405
1 day, 23:50:09	0.942	0.939	0.97	1.002	1	0.959			0.851667	0.848667	0.879667	0.911667	0.909667	0.868667	0.878333	0.011224
1 day, 23:55:09	0.941	0.939	0.971	1.002	1.001	0.961			0.850333	0.848333	0.880333	0.911333	0.910333	0.870333	0.8785	0.0113502
2 days, 0:00:09	0.941	0.94	0.973	1.003	1.001	0.962			0.851	0.85	0.883	0.913	0.911	0.872	0.88	0.011349

## Sheet: W1-L
Time	A3	B8	C11	E2	F6	G9		raw data - medium control mean	A3	B8	C11	E2	F6	G9	mean	se
00:00:09	0.121	0.111	0.117	0.13	0.114	0.125			0.0203333	0.0103333	0.0163333	0.0293333	0.0133333	0.0243333	0.019	0.00289444
00:05:09	0.117	0.106	0.11	0.122	0.108	0.132			0.021	0.01	0.014	0.026	0.012	0.036	0.0198333	0.00405312
00:10:09	0.117	0.105	0.111	0.128	0.108	0.12			0.021	0.009	0.015	0.032	0.012	0.024	0.0188333	0.00347771
00:15:09	0.118	0.105	0.111	0.128	0.108	0.124			0.0223333	0.00933333	0.0153333	0.0323333	0.0123333	0.0283333	0.02	0.00374759
00:20:09	0.118	0.105	0.111	0.127	0.109	0.119			0.0223333	0.00933333	0.0153333	0.0313333	0.0133333	0.0233333	0.0191667	0.00327024
00:25:09	0.118	0.105	0.111	0.121	0.108	0.119			0.022	0.009	0.015	0.025	0.012	0.023	0.0176667	0.00267914
00:30:09	0.117	0.104	0.111	0.13	0.109	0.124			0.0213333	0.00833333	0.0153333	0.0343333	0.0133333	0.0283333	0.0201667	0.00399514
00:35:09	0.116	0.104	0.111	0.129	0.108	0.143			0.0206667	0.00866667	0.0156667	0.0336667	0.0126667	0.0476667	0.0231667	0.00603738
00:40:09	0.115	0.103	0.11	0.126	0.108	0.137			0.0196667	0.00766667	0.0146667	0.0306667	0.0126667	0.0416667	0.0211667	0.00519455
00:45:09	0.115	0.103	0.11	0.128	0.108	0.143			0.0196667	0.00766667	0.0146667	0.0326667	0.0126667	0.0476667	0.0225	0.00611782
00:50:09	0.115	0.102	0.11	0.13	0.107	0.13			0.0196667	0.00666667	0.0146667	0.0346667	0.0116667	0.0346667	0.0203333	0.00484883
00:55:09	0.115	0.102	0.109	0.131	0.107	0.14			0.0196667	0.00666667	0.0136667	0.0356667	0.0116667	0.0446667	0.022	0.00610282
01:00:09	0.115	0.102	0.109	0.133	0.107	0.124			0.0196667	0.00666667	0.0136667	0.0376667	0.0116667	0.0286667	0.0196667	0.0047399												48h
01:05:09	0.116	0.102	0.109	0.134	0.107	0.126			0.0206667	0.00666667	0.0136667	0.0386667	0.0116667	0.0306667	0.0203333	0.00499778
01:10:09	0.116	0.102	0.108	0.135	0.107	0.132			0.0206667	0.00666667	0.0126667	0.0396667	0.0116667	0.0366667	0.0213333	0.00564309
01:15:09	0.116	0.102	0.108	0.136	0.107	0.135			0.0206667	0.00666667	0.0126667	0.0406667	0.0116667	0.0396667	0.022	0.0060314
01:20:09	0.116	0.102	0.109	0.137	0.108	0.137			0.0206667	0.00666667	0.0136667	0.0416667	0.0126667	0.0416667	0.0228333	0.00622584
01:25:09	0.116	0.102	0.109	0.138	0.107	0.138			0.0206667	0.00666667	0.0136667	0.0426667	0.0116667	0.0426667	0.023	0.00648417
01:30:09	0.117	0.102	0.109	0.14	0.108	0.14			0.0216667	0.00666667	0.0136667	0.0446667	0.0126667	0.0446667	0.024	0.00681991
01:35:09	0.118	0.103	0.11	0.142	0.108	0.139			0.0226667	0.00766667	0.0146667	0.0466667	0.0126667	0.0436667	0.0246667	0.00678724
01:40:09	0.12	0.103	0.111	0.144	0.109	0.14			0.0246667	0.00766667	0.0156667	0.0486667	0.0136667	0.0446667	0.0258333	0.00697336
01:45:09	0.122	0.103	0.113	0.147	0.11	0.142			0.0266667	0.00766667	0.0176667	0.0516667	0.0146667	0.0466667	0.0275	0.00731855
01:50:09	0.123	0.104	0.114	0.149	0.111	0.145			0.0276667	0.00866667	0.0186667	0.0536667	0.0156667	0.0496667	0.029	0.00760555
01:55:09	0.121	0.104	0.116	0.15	0.113	0.146			0.0256667	0.00866667	0.0206667	0.0546667	0.0176667	0.0506667	0.0296667	0.00763326
02:00:09	0.121	0.105	0.118	0.152	0.113	0.149			0.0256667	0.00966667	0.0226667	0.0566667	0.0176667	0.0536667	0.031	0.0079652
02:05:09	0.124	0.106	0.119	0.155	0.115	0.151			0.0286667	0.0106667	0.0236667	0.0596667	0.0196667	0.0556667	0.033	0.00817992
02:10:09	0.127	0.106	0.122	0.158	0.117	0.153			0.032	0.011	0.027	0.063	0.022	0.058	0.0355	0.00842516
02:15:09	0.128	0.107	0.124	0.161	0.117	0.157			0.0326667	0.0116667	0.0286667	0.0656667	0.0216667	0.0616667	0.037	0.00893557
02:20:09	0.129	0.108	0.125	0.164	0.12	0.159			0.034	0.013	0.03	0.069	0.025	0.064	0.0391667	0.00913388
02:25:09	0.131	0.11	0.127	0.166	0.125	0.162			0.036	0.015	0.032	0.071	0.03	0.067	0.0418333	0.00908265
02:30:09	0.132	0.111	0.129	0.168	0.129	0.163			0.037	0.016	0.034	0.073	0.034	0.068	0.0436667	0.00903573
02:35:09	0.134	0.112	0.13	0.172	0.13	0.164			0.039	0.017	0.035	0.077	0.035	0.069	0.0453333	0.00934404
02:40:09	0.135	0.114	0.132	0.175	0.129	0.166			0.04	0.019	0.037	0.08	0.034	0.071	0.0468333	0.00960353
02:45:09	0.136	0.116	0.133	0.179	0.128	0.169			0.041	0.021	0.038	0.084	0.033	0.074	0.0485	0.0101218
02:50:09	0.137	0.118	0.136	0.183	0.129	0.172			0.042	0.023	0.041	0.088	0.034	0.077	0.0508333	0.0104862
02:55:09	0.138	0.121	0.137	0.186	0.13	0.175			0.043	0.026	0.042	0.091	0.035	0.08	0.0528333	0.0107189
03:00:09	0.14	0.126	0.141	0.19	0.132	0.179			0.045	0.031	0.046	0.095	0.037	0.084	0.0563333	0.0108187
03:05:09	0.141	0.129	0.142	0.192	0.133	0.182			0.046	0.034	0.047	0.097	0.038	0.087	0.0581667	0.0109588
03:10:09	0.142	0.128	0.144	0.196	0.135	0.184			0.047	0.033	0.049	0.101	0.04	0.089	0.0598333	0.0114613
03:15:09	0.144	0.127	0.147	0.199	0.137	0.188			0.049	0.032	0.052	0.104	0.042	0.093	0.062	0.0119638
03:20:09	0.145	0.127	0.149	0.202	0.138	0.19			0.05	0.032	0.054	0.107	0.043	0.095	0.0635	0.0123417
03:25:09	0.146	0.128	0.151	0.206	0.14	0.193			0.051	0.033	0.056	0.111	0.045	0.098	0.0656667	0.0127845
03:30:09	0.148	0.13	0.154	0.21	0.14	0.196			0.053	0.035	0.059	0.115	0.045	0.101	0.068	0.0131934
03:35:09	0.15	0.132	0.158	0.214	0.143	0.199			0.055	0.037	0.063	0.119	0.048	0.104	0.071	0.0134139												12h
03:40:09	0.152	0.135	0.162	0.218	0.144	0.203			0.057	0.04	0.067	0.123	0.049	0.108	0.074	0.013755
03:45:09	0.154	0.137	0.164	0.222	0.148	0.206			0.059	0.042	0.069	0.127	0.053	0.111	0.0768333	0.0139581
03:50:09	0.158	0.139	0.173	0.227	0.151	0.212			0.063	0.044	0.078	0.132	0.056	0.117	0.0816667	0.0144006
03:55:09	0.16	0.141	0.18	0.231	0.154	0.215			0.065	0.046	0.085	0.136	0.059	0.12	0.0851667	0.014632
04:00:09	0.163	0.144	0.181	0.236	0.157	0.219			0.068	0.049	0.086	0.141	0.062	0.124	0.0883333	0.0149503
04:05:09	0.165	0.147	0.182	0.24	0.162	0.22			0.07	0.052	0.087	0.145	0.067	0.125	0.091	0.0148616
04:10:09	0.167	0.149	0.188	0.247	0.168	0.224			0.072	0.054	0.093	0.152	0.073	0.129	0.0955	0.0153856
04:15:09	0.172	0.151	0.192	0.25	0.168	0.229			0.077	0.056	0.097	0.155	0.073	0.134	0.0986667	0.0156773
04:20:09	0.176	0.154	0.198	0.256	0.173	0.234			0.081	0.059	0.103	0.161	0.078	0.139	0.1035	0.0160245
04:25:09	0.18	0.156	0.203	0.261	0.176	0.238			0.085	0.061	0.108	0.166	0.081	0.143	0.107333	0.0163843
04:30:09	0.185	0.159	0.206	0.269	0.182	0.243			0.09	0.064	0.111	0.174	0.087	0.148	0.112333	0.0168852
04:35:09	0.19	0.162	0.209	0.273	0.186	0.248			0.095	0.067	0.114	0.178	0.091	0.153	0.116333	0.0170131
04:40:09	0.196	0.167	0.216	0.278	0.19	0.251			0.101333	0.0723333	0.121333	0.183333	0.0953333	0.156333	0.121667	0.0168773
04:45:09	0.197	0.17	0.222	0.282	0.196	0.256			0.102333	0.0753333	0.127333	0.187333	0.101333	0.161333	0.125833	0.0170758
04:50:09	0.203	0.175	0.228	0.286	0.2	0.259			0.108333	0.0803333	0.133333	0.191333	0.105333	0.164333	0.1305	0.0168274
04:55:09	0.209	0.176	0.234	0.292	0.204	0.263			0.114333	0.0813333	0.139333	0.197333	0.109333	0.168333	0.135	0.0173025
05:00:09	0.215	0.191	0.241	0.293	0.207	0.266			0.120333	0.0963333	0.146333	0.198333	0.112333	0.171333	0.140833	0.0157898
05:05:09	0.22	0.192	0.248	0.299	0.211	0.271			0.125333	0.0973333	0.153333	0.204333	0.116333	0.176333	0.1455	0.0163817
05:10:09	0.226	0.194	0.255	0.3	0.217	0.274			0.131333	0.0993333	0.160333	0.205333	0.122333	0.179333	0.149667	0.0160305
05:15:09	0.233	0.197	0.262	0.303	0.222	0.279			0.138333	0.102333	0.167333	0.208333	0.127333	0.184333	0.154667	0.0159931
05:20:09	0.238	0.2	0.268	0.307	0.228	0.283			0.143333	0.105333	0.173333	0.212333	0.133333	0.188333	0.159333	0.0160146
05:25:09	0.244	0.206	0.277	0.313	0.233	0.289			0.149333	0.111333	0.182333	0.218333	0.138333	0.194333	0.165667	0.0161651
05:30:09	0.251	0.211	0.29	0.321	0.239	0.294			0.156333	0.116333	0.195333	0.226333	0.144333	0.199333	0.173	0.0166807
05:35:09	0.259	0.218	0.304	0.327	0.246	0.298			0.164333	0.123333	0.209333	0.232333	0.151333	0.203333	0.180667	0.0167524
05:40:09	0.264	0.222	0.356	0.34	0.253	0.301			0.169333	0.127333	0.261333	0.245333	0.158333	0.206333	0.194667	0.0213255
05:45:08	0.271	0.229	0.405	0.362	0.259	0.304			0.176333	0.134333	0.310333	0.267333	0.164333	0.209333	0.210333	0.0272629
05:50:09	0.278	0.235	0.412	0.386	0.267	0.308			0.183333	0.140333	0.317333	0.291333	0.172333	0.213333	0.219667	0.0286178
05:55:09	0.284	0.242	0.401	0.417	0.286	0.311			0.189333	0.147333	0.306333	0.322333	0.191333	0.216333	0.228833	0.0285853
06:00:09	0.293	0.249	0.432	0.467	0.31	0.347			0.198667	0.154667	0.337667	0.372667	0.215667	0.252667	0.255333	0.0343857
06:05:09	0.314	0.257	0.465	0.494	0.388	0.382			0.219667	0.162667	0.370667	0.399667	0.293667	0.287667	0.289	0.036381
06:10:09	0.414	0.263	0.453	0.488	0.46	0.417			0.319333	0.168333	0.358333	0.393333	0.365333	0.322333	0.321167	0.0326102
06:15:09	0.412	0.269	0.472	0.48	0.452	0.449			0.317667	0.174667	0.377667	0.385667	0.357667	0.354667	0.328	0.0321462
06:20:09	0.437	0.275	0.478	0.508	0.459	0.461			0.342667	0.180667	0.383667	0.413667	0.364667	0.366667	0.342	0.0336766
06:25:09	0.456	0.284	0.476	0.512	0.433	0.467			0.361333	0.189333	0.381333	0.417333	0.338333	0.372333	0.343333	0.0325709
06:30:09	0.458	0.3	0.483	0.513	0.461	0.484			0.363667	0.205667	0.388667	0.418667	0.366667	0.389667	0.3555	0.031037
06:35:09	0.46	0.328	0.487	0.515	0.466	0.496			0.365667	0.233667	0.392667	0.420667	0.371667	0.401667	0.364333	0.0273857
06:40:09	0.47	0.389	0.489	0.519	0.477	0.495			0.375667	0.294667	0.394667	0.424667	0.382667	0.400667	0.378833	0.0181997
06:45:09	0.476	0.419	0.487	0.52	0.478	0.499			0.381667	0.324667	0.392667	0.425667	0.383667	0.404667	0.3855	0.0138454
06:50:08	0.474	0.422	0.487	0.523	0.481	0.503			0.379667	0.327667	0.392667	0.428667	0.386667	0.408667	0.387333	0.013918
06:55:09	0.476	0.452	0.486	0.526	0.482	0.502			0.381667	0.357667	0.391667	0.431667	0.387667	0.407667	0.393	0.0101937
07:00:09	0.478	0.461	0.486	0.525	0.484	0.505			0.383667	0.366667	0.391667	0.430667	0.389667	0.410667	0.3955	0.00910464
07:05:09	0.48	0.494	0.486	0.526	0.483	0.505			0.386	0.4	0.392	0.432	0.389	0.411	0.401667	0.00709303
07:10:09	0.48	0.491	0.486	0.524	0.486	0.507			0.385667	0.396667	0.391667	0.429667	0.391667	0.412667	0.401333	0.00679542
07:15:09	0.481	0.498	0.485	0.526	0.486	0.506			0.386667	0.403667	0.390667	0.431667	0.391667	0.411667	0.402667	0.00693782
07:20:09	0.482	0.5	0.485	0.529	0.486	0.507			0.388	0.406	0.391	0.435	0.392	0.413	0.404167	0.00733674
07:25:09	0.482	0.502	0.484	0.527	0.486	0.508			0.388	0.408	0.39	0.433	0.392	0.414	0.404167	0.00719452
07:30:09	0.483	0.502	0.483	0.529	0.486	0.508			0.389	0.408	0.389	0.435	0.392	0.414	0.4045	0.00745989
07:35:09	0.484	0.508	0.484	0.53	0.486	0.51			0.389667	0.413667	0.389667	0.435667	0.391667	0.415667	0.406	0.00768404
07:40:09	0.486	0.502	0.484	0.532	0.485	0.511			0.392	0.408	0.39	0.438	0.391	0.417	0.406	0.00780171
07:45:09	0.486	0.503	0.483	0.533	0.484	0.511			0.392	0.409	0.389	0.439	0.39	0.417	0.406	0.0080829
07:50:09	0.486	0.503	0.485	0.535	0.482	0.512			0.392	0.409	0.391	0.441	0.388	0.418	0.4065	0.00840932
07:55:09	0.488	0.502	0.486	0.538	0.482	0.513			0.394	0.408	0.392	0.444	0.388	0.419	0.4075	0.00869387
08:00:09	0.489	0.501	0.488	0.538	0.479	0.514			0.395	0.407	0.394	0.444	0.385	0.42	0.4075	0.00881949
08:05:09	0.492	0.498	0.488	0.539	0.479	0.515			0.398	0.404	0.394	0.445	0.385	0.421	0.407833	0.00890474
08:10:09	0.491	0.497	0.489	0.54	0.48	0.516			0.397	0.403	0.395	0.446	0.386	0.422	0.408167	0.00901634
08:15:09	0.493	0.495	0.492	0.542	0.48	0.515			0.399	0.401	0.398	0.448	0.386	0.421	0.408833	0.00908998
08:20:09	0.493	0.496	0.492	0.543	0.479	0.516			0.399	0.402	0.398	0.449	0.385	0.422	0.409167	0.00933601
08:25:09	0.494	0.495	0.493	0.544	0.48	0.517			0.4	0.401	0.399	0.45	0.386	0.423	0.409833	0.00939296
08:30:09	0.496	0.495	0.495	0.546	0.479	0.518			0.402	0.401	0.401	0.452	0.385	0.424	0.410833	0.0096727
08:35:09	0.497	0.497	0.497	0.547	0.479	0.519			0.403	0.403	0.403	0.453	0.385	0.425	0.412	0.0096988
08:40:09	0.497	0.495	0.498	0.548	0.479	0.52			0.403	0.401	0.404	0.454	0.385	0.426	0.412167	0.00992444
08:45:09	0.498	0.496	0.499	0.549	0.478	0.521			0.404	0.402	0.405	0.455	0.384	0.427	0.412833	0.0101108
08:50:09	0.499	0.497	0.5	0.55	0.478	0.522			0.405	0.403	0.406	0.456	0.384	0.428	0.413667	0.0102068
08:55:09	0.502	0.497	0.502	0.551	0.479	0.524			0.408	0.403	0.408	0.457	0.385	0.43	0.415167	0.0102157
09:00:09	0.502	0.497	0.503	0.552	0.478	0.525			0.408	0.403	0.409	0.458	0.384	0.431	0.4155	0.0104778
09:05:09	0.503	0.498	0.505	0.553	0.479	0.528			0.409	0.404	0.411	0.459	0.385	0.434	0.417	0.0105609
09:10:09	0.505	0.499	0.506	0.555	0.48	0.531			0.411	0.405	0.412	0.461	0.386	0.437	0.418667	0.0107786
09:15:09	0.506	0.5	0.508	0.556	0.482	0.532			0.412	0.406	0.414	0.462	0.388	0.438	0.42	0.0106583
09:20:09	0.507	0.499	0.51	0.555	0.484	0.534			0.413	0.405	0.416	0.461	0.39	0.44	0.420833	0.0104353
09:25:09	0.508	0.5	0.51	0.555	0.485	0.537			0.414	0.406	0.416	0.461	0.391	0.443	0.421833	0.0104544
09:30:09	0.511	0.501	0.512	0.557	0.486	0.538			0.417	0.407	0.418	0.463	0.392	0.444	0.4235	0.0105159
09:35:09	0.511	0.501	0.512	0.559	0.488	0.539			0.417	0.407	0.418	0.465	0.394	0.445	0.424333	0.0106385
09:40:09	0.513	0.503	0.514	0.561	0.488	0.542			0.419	0.409	0.42	0.467	0.394	0.448	0.426167	0.0108978
09:45:09	0.516	0.504	0.516	0.563	0.488	0.544			0.422	0.41	0.422	0.469	0.394	0.45	0.427833	0.0111308
09:50:09	0.516	0.504	0.516	0.564	0.489	0.545			0.422	0.41	0.422	0.47	0.395	0.451	0.428333	0.011221
09:55:09	0.517	0.506	0.519	0.565	0.49	0.547			0.423	0.412	0.425	0.471	0.396	0.453	0.43	0.0112012
10:00:09	0.519	0.507	0.52	0.566	0.492	0.548			0.425	0.413	0.426	0.472	0.398	0.454	0.431333	0.0110805
10:05:09	0.522	0.508	0.522	0.568	0.493	0.55			0.428	0.414	0.428	0.474	0.399	0.456	0.433167	0.0112203
10:10:09	0.522	0.508	0.523	0.57	0.494	0.552			0.428	0.414	0.429	0.476	0.4	0.458	0.434167	0.0114845
10:15:09	0.524	0.51	0.526	0.572	0.495	0.555			0.43	0.416	0.432	0.478	0.401	0.461	0.436333	0.0116409
10:20:09	0.525	0.511	0.528	0.574	0.498	0.558			0.431	0.417	0.434	0.48	0.404	0.464	0.438333	0.0116924
10:25:09	0.526	0.513	0.529	0.575	0.499	0.559			0.432	0.419	0.435	0.481	0.405	0.465	0.4395	0.0116326
10:30:09	0.528	0.514	0.532	0.577	0.5	0.561			0.434	0.42	0.438	0.483	0.406	0.467	0.441333	0.0117804
10:35:09	0.529	0.516	0.532	0.579	0.502	0.563			0.435333	0.422333	0.438333	0.485333	0.408333	0.469333	0.443167	0.0118249
10:40:09	0.531	0.517	0.534	0.581	0.505	0.565			0.437	0.423	0.44	0.487	0.411	0.471	0.444833	0.0117882
10:45:09	0.533	0.517	0.535	0.583	0.507	0.566			0.439	0.423	0.441	0.489	0.413	0.472	0.446167	0.0118558
10:50:09	0.534	0.519	0.536	0.584	0.508	0.568			0.44	0.425	0.442	0.49	0.414	0.474	0.4475	0.0118652
10:55:09	0.536	0.521	0.539	0.585	0.509	0.569			0.442	0.427	0.445	0.491	0.415	0.475	0.449167	0.0117542
11:00:09	0.537	0.522	0.54	0.587	0.511	0.572			0.443333	0.428333	0.446333	0.493333	0.417333	0.478333	0.451167	0.0119259
11:05:09	0.539	0.523	0.541	0.589	0.514	0.573			0.445	0.429	0.447	0.495	0.42	0.479	0.4525	0.0118371
11:10:09	0.54	0.526	0.543	0.591	0.514	0.575			0.446333	0.432333	0.449333	0.497333	0.420333	0.481333	0.4545	0.0119817
11:15:09	0.542	0.527	0.544	0.593	0.518	0.577			0.448	0.433	0.45	0.499	0.424	0.483	0.456167	0.0118755
11:20:09	0.542	0.529	0.546	0.595	0.519	0.578			0.448	0.435	0.452	0.501	0.425	0.484	0.4575	0.0119408
11:25:09	0.543	0.53	0.547	0.597	0.521	0.581			0.449333	0.436333	0.453333	0.503333	0.427333	0.487333	0.4595	0.0121228
11:30:09	0.544	0.531	0.548	0.599	0.521	0.582			0.450667	0.437667	0.454667	0.505667	0.427667	0.488667	0.460833	0.0123327
11:35:09	0.546	0.532	0.55	0.601	0.522	0.584			0.452	0.438	0.456	0.507	0.428	0.49	0.461833	0.0124858
11:40:09	0.547	0.533	0.552	0.603	0.521	0.586			0.453333	0.439333	0.458333	0.509333	0.427333	0.492333	0.463333	0.0128504
11:45:09	0.548	0.534	0.553	0.604	0.524	0.587			0.454333	0.440333	0.459333	0.510333	0.430333	0.493333	0.464667	0.0126667
11:50:09	0.551	0.535	0.556	0.607	0.526	0.59			0.457333	0.441333	0.462333	0.513333	0.432333	0.496333	0.467167	0.0128878
11:55:09	0.552	0.536	0.556	0.608	0.525	0.592			0.458	0.442	0.462	0.514	0.431	0.498	0.4675	0.0131599
12:00:09	0.555	0.537	0.559	0.61	0.525	0.594			0.461333	0.443333	0.465333	0.516333	0.431333	0.500333	0.469667	0.0133783
12:05:09	0.556	0.539	0.561	0.613	0.527	0.597			0.462333	0.445333	0.467333	0.519333	0.433333	0.503333	0.471833	0.0135935
12:10:09	0.559	0.541	0.562	0.615	0.529	0.599			0.465667	0.447667	0.468667	0.521667	0.435667	0.505667	0.474167	0.0135837
12:15:09	0.56	0.543	0.563	0.618	0.531	0.602			0.466333	0.449333	0.469333	0.524333	0.437333	0.508333	0.475833	0.0138148
12:20:08	0.561	0.545	0.564	0.621	0.533	0.603			0.467667	0.451667	0.470667	0.527667	0.439667	0.509667	0.477833	0.0138958
12:25:09	0.563	0.547	0.566	0.625	0.535	0.605			0.469333	0.453333	0.472333	0.531333	0.441333	0.511333	0.479833	0.0141368
12:30:09	0.564	0.548	0.567	0.628	0.536	0.607			0.470667	0.454667	0.473667	0.534667	0.442667	0.513667	0.481667	0.0144545
12:35:09	0.565	0.55	0.57	0.631	0.537	0.609			0.471667	0.456667	0.476667	0.537667	0.443667	0.515667	0.483667	0.0146765
12:40:09	0.566	0.552	0.572	0.635	0.539	0.611			0.472667	0.458667	0.478667	0.541667	0.445667	0.517667	0.485833	0.014952
12:45:09	0.568	0.554	0.573	0.639	0.541	0.614			0.474667	0.460667	0.479667	0.545667	0.447667	0.520667	0.488167	0.01529
12:50:09	0.571	0.556	0.576	0.642	0.543	0.618			0.477667	0.462667	0.482667	0.548667	0.449667	0.524667	0.491	0.0155106
12:55:09	0.572	0.557	0.578	0.645	0.545	0.62			0.478667	0.463667	0.484667	0.551667	0.451667	0.526667	0.492833	0.0157256
13:00:09	0.574	0.559	0.58	0.648	0.546	0.622			0.480333	0.465333	0.486333	0.554333	0.452333	0.528333	0.4945	0.0159382
13:05:09	0.575	0.561	0.583	0.65	0.549	0.624			0.481667	0.467667	0.489667	0.556667	0.455667	0.530667	0.497	0.0158654
13:10:09	0.579	0.562	0.584	0.653	0.551	0.626			0.485667	0.468667	0.490667	0.559667	0.457667	0.532667	0.499167	0.0160099
13:15:09	0.579	0.565	0.587	0.655	0.553	0.628			0.485667	0.471667	0.493667	0.561667	0.459667	0.534667	0.501167	0.0159911
13:20:09	0.58	0.565	0.587	0.657	0.555	0.629			0.486667	0.471667	0.493667	0.563667	0.461667	0.535667	0.502167	0.0161116
13:25:09	0.581	0.568	0.589	0.659	0.558	0.632			0.487667	0.474667	0.495667	0.565667	0.464667	0.538667	0.5045	0.0160695
13:30:09	0.582	0.569	0.591	0.661	0.56	0.634			0.489	0.476	0.498	0.568	0.467	0.541	0.5065	0.0161674
13:35:09	0.584	0.571	0.593	0.663	0.561	0.636			0.490667	0.477667	0.499667	0.569667	0.467667	0.542667	0.508	0.0162494
13:40:09	0.586	0.573	0.596	0.664	0.564	0.638			0.493	0.48	0.503	0.571	0.471	0.545	0.5105	0.0160245
13:45:09	0.589	0.573	0.596	0.667	0.566	0.64			0.495667	0.479667	0.502667	0.573667	0.472667	0.546667	0.511833	0.0162797
13:50:09	0.589	0.575	0.598	0.668	0.568	0.641			0.495667	0.481667	0.504667	0.574667	0.474667	0.547667	0.513167	0.0161509
13:55:09	0.593	0.577	0.601	0.67	0.568	0.644			0.499667	0.483667	0.507667	0.576667	0.474667	0.550667	0.5155	0.0163001
14:00:09	0.595	0.578	0.601	0.672	0.569	0.644			0.502333	0.485333	0.508333	0.579333	0.476333	0.551333	0.517167	0.016341
14:05:09	0.596	0.58	0.603	0.675	0.571	0.647			0.503333	0.487333	0.510333	0.582333	0.478333	0.554333	0.519333	0.016569
14:10:09	0.598	0.581	0.605	0.676	0.572	0.648			0.504667	0.487667	0.511667	0.582667	0.478667	0.554667	0.52	0.01652
14:15:09	0.599	0.584	0.606	0.678	0.573	0.651			0.506	0.491	0.513	0.585	0.48	0.558	0.522167	0.0166602
14:20:09	0.599	0.583	0.607	0.681	0.575	0.652			0.506333	0.490333	0.514333	0.588333	0.482333	0.559333	0.5235	0.016991
14:25:09	0.601	0.586	0.608	0.684	0.576	0.653			0.508	0.493	0.515	0.591	0.483	0.56	0.525	0.0170861
14:30:09	0.602	0.588	0.61	0.685	0.578	0.655			0.509333	0.495333	0.517333	0.592333	0.485333	0.562333	0.527	0.0169915
14:35:09	0.605	0.59	0.613	0.684	0.579	0.658			0.512333	0.497333	0.520333	0.591333	0.486333	0.565333	0.528833	0.0167148
14:40:09	0.605	0.591	0.613	0.686	0.581	0.659			0.512333	0.498333	0.520333	0.593333	0.488333	0.566333	0.529833	0.0168082
14:45:09	0.607	0.592	0.615	0.688	0.581	0.66			0.514333	0.499333	0.522333	0.595333	0.488333	0.567333	0.531167	0.0169655
14:50:09	0.609	0.594	0.617	0.69	0.583	0.663			0.516333	0.501333	0.524333	0.597333	0.490333	0.570333	0.533333	0.0170372
14:55:09	0.61	0.596	0.618	0.693	0.584	0.664			0.517333	0.503333	0.525333	0.600333	0.491333	0.571333	0.534833	0.0172274
15:00:09	0.611	0.597	0.619	0.696	0.586	0.665			0.518333	0.504333	0.526333	0.603333	0.493333	0.572333	0.536333	0.0173992
15:05:09	0.613	0.598	0.621	0.697	0.588	0.667			0.520333	0.505333	0.528333	0.604333	0.495333	0.574333	0.538	0.0173333
15:10:09	0.615	0.6	0.623	0.701	0.589	0.669			0.522333	0.507333	0.530333	0.608333	0.496333	0.576333	0.540167	0.0176719
15:15:09	0.616	0.602	0.624	0.701	0.589	0.671			0.523333	0.509333	0.531333	0.608333	0.496333	0.578333	0.541167	0.017636
15:20:08	0.619	0.605	0.626	0.704	0.591	0.673			0.526333	0.512333	0.533333	0.611333	0.498333	0.580333	0.543667	0.0176704
15:25:09	0.62	0.604	0.626	0.706	0.593	0.675			0.527333	0.511333	0.533333	0.613333	0.500333	0.582333	0.544667	0.0179252
15:30:09	0.622	0.605	0.628	0.708	0.594	0.676			0.529333	0.512333	0.535333	0.615333	0.501333	0.583333	0.546167	0.0180008
15:35:09	0.624	0.607	0.629	0.709	0.595	0.678			0.531333	0.514333	0.536333	0.616333	0.502333	0.585333	0.547667	0.0179771
15:40:09	0.625	0.61	0.631	0.708	0.597	0.68			0.532333	0.517333	0.538333	0.615333	0.504333	0.587333	0.549167	0.0175678
15:45:09	0.627	0.611	0.632	0.708	0.598	0.681			0.534333	0.518333	0.539333	0.615333	0.505333	0.588333	0.550167	0.0174115
15:50:09	0.628	0.613	0.635	0.708	0.6	0.683			0.535333	0.520333	0.542333	0.615333	0.507333	0.590333	0.551833	0.0171751
15:55:09	0.629	0.613	0.635	0.71	0.601	0.685			0.536333	0.520333	0.542333	0.617333	0.508333	0.592333	0.552833	0.0174542
16:00:09	0.63	0.617	0.637	0.713	0.602	0.686			0.537333	0.524333	0.544333	0.620333	0.509333	0.593333	0.554833	0.0175019
16:05:09	0.63	0.617	0.638	0.714	0.604	0.688			0.537333	0.524333	0.545333	0.621333	0.511333	0.595333	0.555833	0.0175836
16:10:09	0.632	0.618	0.64	0.716	0.604	0.69			0.539333	0.525333	0.547333	0.623333	0.511333	0.597333	0.557333	0.0178139
16:15:09	0.635	0.619	0.641	0.716	0.605	0.69			0.542333	0.526333	0.548333	0.623333	0.512333	0.597333	0.558333	0.0175518
16:20:09	0.637	0.62	0.642	0.716	0.607	0.692			0.544333	0.527333	0.549333	0.623333	0.514333	0.599333	0.559667	0.0173871
16:25:09	0.637	0.621	0.644	0.717	0.609	0.693			0.544333	0.528333	0.551333	0.624333	0.516333	0.600333	0.560833	0.0173123
16:30:09	0.64	0.623	0.645	0.719	0.61	0.695			0.547333	0.530333	0.552333	0.626333	0.517333	0.602333	0.562667	0.0173871
16:35:09	0.642	0.624	0.646	0.721	0.611	0.696			0.549333	0.531333	0.553333	0.628333	0.518333	0.603333	0.564	0.0174808
16:40:09	0.643	0.625	0.648	0.721	0.613	0.699			0.550333	0.532333	0.555333	0.628333	0.520333	0.606333	0.5655	0.0174058
16:45:09	0.643	0.627	0.649	0.722	0.614	0.7			0.550333	0.534333	0.556333	0.629333	0.521333	0.607333	0.5665	0.0173732
16:50:09	0.645	0.628	0.651	0.724	0.615	0.702			0.552333	0.535333	0.558333	0.631333	0.522333	0.609333	0.568167	0.0175222
16:55:09	0.646	0.63	0.652	0.726	0.616	0.704			0.553333	0.537333	0.559333	0.633333	0.523333	0.611333	0.569667	0.0176591
17:00:09	0.646	0.63	0.653	0.727	0.618	0.704			0.553333	0.537333	0.560333	0.634333	0.525333	0.611333	0.570333	0.0175879
17:05:09	0.649	0.631	0.655	0.73	0.618	0.705			0.556333	0.538333	0.562333	0.637333	0.525333	0.612333	0.572	0.0178375
17:10:09	0.65	0.633	0.656	0.729	0.619	0.707			0.557333	0.540333	0.563333	0.636333	0.526333	0.614333	0.573	0.01761
17:15:09	0.653	0.635	0.658	0.731	0.621	0.71			0.560333	0.542333	0.565333	0.638333	0.528333	0.617333	0.575333	0.0176597
17:20:09	0.653	0.634	0.658	0.731	0.622	0.71			0.560333	0.541333	0.565333	0.638333	0.529333	0.617333	0.575333	0.0176352
17:25:09	0.654	0.635	0.659	0.732	0.624	0.712			0.561333	0.542333	0.566333	0.639333	0.531333	0.619333	0.576667	0.0176289
17:30:09	0.656	0.637	0.66	0.733	0.625	0.713			0.563333	0.544333	0.567333	0.640333	0.532333	0.620333	0.578	0.017536
17:35:09	0.656	0.635	0.66	0.733	0.625	0.714			0.563333	0.542333	0.567333	0.640333	0.532333	0.621333	0.577833	0.0177478
17:40:09	0.658	0.64	0.664	0.734	0.627	0.716			0.565333	0.547333	0.571333	0.641333	0.534333	0.623333	0.5805	0.0173981
17:45:09	0.659	0.641	0.665	0.735	0.629	0.717			0.566333	0.548333	0.572333	0.642333	0.536333	0.624333	0.581667	0.0173102
17:50:09	0.66	0.643	0.665	0.736	0.63	0.719			0.567333	0.550333	0.572333	0.643333	0.537333	0.626333	0.582833	0.0173489
17:55:09	0.662	0.644	0.667	0.738	0.631	0.72			0.569333	0.551333	0.574333	0.645333	0.538333	0.627333	0.584333	0.0174165
18:00:09	0.662	0.644	0.668	0.739	0.632	0.72			0.569333	0.551333	0.575333	0.646333	0.539333	0.627333	0.584833	0.0174275
18:05:09	0.663	0.646	0.67	0.74	0.633	0.722			0.570333	0.553333	0.577333	0.647333	0.540333	0.629333	0.586333	0.0174279
18:10:09	0.665	0.648	0.67	0.741	0.634	0.724			0.572333	0.555333	0.577333	0.648333	0.541333	0.631333	0.587667	0.0174369
18:15:09	0.666	0.649	0.672	0.744	0.634	0.725			0.573333	0.556333	0.579333	0.651333	0.541333	0.632333	0.589	0.0177401
18:20:09	0.667	0.65	0.673	0.745	0.636	0.726			0.574333	0.557333	0.580333	0.652333	0.543333	0.633333	0.590167	0.0176511
18:25:09	0.668	0.651	0.675	0.746	0.637	0.728			0.575333	0.558333	0.582333	0.653333	0.544333	0.635333	0.5915	0.0177152
18:30:09	0.669	0.652	0.676	0.748	0.639	0.73			0.576333	0.559333	0.583333	0.655333	0.546333	0.637333	0.593	0.0178263
18:35:09	0.67	0.653	0.676	0.748	0.64	0.73			0.577333	0.560333	0.583333	0.655333	0.547333	0.637333	0.5935	0.0176454
18:40:09	0.673	0.654	0.677	0.75	0.64	0.732			0.580333	0.561333	0.584333	0.657333	0.547333	0.639333	0.595	0.0178749
18:45:09	0.674	0.656	0.679	0.751	0.641	0.732			0.581333	0.563333	0.586333	0.658333	0.548333	0.639333	0.596167	0.0177114
18:50:09	0.676	0.657	0.68	0.751	0.643	0.734			0.583333	0.564333	0.587333	0.658333	0.550333	0.641333	0.5975	0.0175602
18:55:09	0.677	0.658	0.681	0.752	0.644	0.734			0.584333	0.565333	0.588333	0.659333	0.551333	0.641333	0.598333	0.0174776
19:00:09	0.677	0.659	0.683	0.753	0.645	0.736			0.584333	0.566333	0.590333	0.660333	0.552333	0.643333	0.5995	0.0175697
19:05:09	0.677	0.66	0.683	0.753	0.645	0.738			0.584333	0.567333	0.590333	0.660333	0.552333	0.645333	0.6	0.0176761
19:10:09	0.68	0.661	0.685	0.753	0.646	0.739			0.587333	0.568333	0.592333	0.660333	0.553333	0.646333	0.601333	0.017489
19:15:09	0.681	0.662	0.686	0.755	0.648	0.742			0.588333	0.569333	0.593333	0.662333	0.555333	0.649333	0.603	0.0176836
19:20:09	0.682	0.663	0.687	0.756	0.649	0.743			0.589333	0.570333	0.594333	0.663333	0.556333	0.650333	0.604	0.0176836
19:25:09	0.683	0.664	0.688	0.757	0.65	0.744			0.590333	0.571333	0.595333	0.664333	0.557333	0.651333	0.605	0.0176836
19:30:09	0.685	0.666	0.69	0.758	0.65	0.746			0.592333	0.573333	0.597333	0.665333	0.557333	0.653333	0.6065	0.0177547
19:35:09	0.684	0.669	0.691	0.759	0.651	0.746			0.591333	0.576333	0.598333	0.666333	0.558333	0.653333	0.607333	0.017603
19:40:09	0.684	0.67	0.692	0.759	0.653	0.748			0.591667	0.577667	0.599667	0.666667	0.560667	0.655667	0.608667	0.0175195
19:45:09	0.687	0.671	0.694	0.76	0.654	0.749			0.594333	0.578333	0.601333	0.667333	0.561333	0.656333	0.609833	0.0174409
19:50:09	0.687	0.672	0.695	0.762	0.654	0.751			0.594667	0.579667	0.602667	0.669667	0.561667	0.658667	0.611167	0.0177628
19:55:09	0.689	0.673	0.696	0.763	0.656	0.752			0.596667	0.580667	0.603667	0.670667	0.563667	0.659667	0.6125	0.0176398
20:00:09	0.691	0.675	0.698	0.763	0.657	0.753			0.598667	0.582667	0.605667	0.670667	0.564667	0.660667	0.613833	0.0174249
20:05:09	0.692	0.676	0.699	0.764	0.659	0.756			0.599667	0.583667	0.606667	0.671667	0.566667	0.663667	0.615333	0.0175132
20:10:09	0.694	0.677	0.701	0.763	0.659	0.756			0.601667	0.584667	0.608667	0.670667	0.566667	0.663667	0.616	0.0172582
20:15:09	0.694	0.677	0.7	0.764	0.66	0.757			0.601667	0.584667	0.607667	0.671667	0.567667	0.664667	0.616333	0.0173775
20:20:09	0.694	0.678	0.702	0.765	0.66	0.758			0.602	0.586	0.61	0.673	0.568	0.666	0.6175	0.0174848
20:25:09	0.696	0.68	0.703	0.765	0.661	0.759			0.604	0.588	0.611	0.673	0.569	0.667	0.618667	0.017291
20:30:09	0.696	0.682	0.706	0.765	0.662	0.761			0.604	0.59	0.614	0.673	0.57	0.669	0.62	0.0172259
20:35:09	0.699	0.682	0.707	0.767	0.663	0.763			0.607	0.59	0.615	0.675	0.571	0.671	0.6215	0.0174236
20:40:09	0.7	0.682	0.708	0.768	0.664	0.765			0.608	0.59	0.616	0.676	0.572	0.673	0.6225	0.0175798
20:45:09	0.7	0.683	0.709	0.769	0.666	0.765			0.608	0.591	0.617	0.677	0.574	0.673	0.623333	0.0174177
20:50:09	0.702	0.684	0.711	0.77	0.667	0.767			0.61	0.592	0.619	0.678	0.575	0.675	0.624833	0.0174727
20:55:09	0.702	0.685	0.712	0.773	0.668	0.768			0.61	0.593	0.62	0.681	0.576	0.676	0.626	0.0177069
21:00:09	0.703	0.685	0.713	0.775	0.668	0.769			0.611	0.593	0.621	0.683	0.576	0.677	0.626833	0.0179674
21:05:09	0.704	0.687	0.714	0.776	0.67	0.769			0.612	0.595	0.622	0.684	0.578	0.677	0.628	0.0177182
21:10:09	0.706	0.686	0.715	0.777	0.671	0.772			0.614	0.594	0.623	0.685	0.579	0.68	0.629167	0.0180026
21:15:09	0.708	0.687	0.716	0.777	0.672	0.774			0.616	0.595	0.624	0.685	0.58	0.682	0.630333	0.0179679
21:20:09	0.709	0.69	0.718	0.778	0.673	0.775			0.617333	0.598333	0.626333	0.686333	0.581333	0.683333	0.632167	0.0178277
21:25:09	0.71	0.691	0.718	0.779	0.673	0.776			0.618	0.599	0.626	0.687	0.581	0.684	0.6325	0.0179346
21:30:09	0.712	0.693	0.721	0.781	0.674	0.777			0.62	0.601	0.629	0.689	0.582	0.685	0.634333	0.0179252
21:35:09	0.712	0.694	0.722	0.782	0.674	0.778			0.620333	0.602333	0.630333	0.690333	0.582333	0.686333	0.635333	0.0180499
21:40:09	0.713	0.694	0.723	0.785	0.675	0.78			0.621	0.602	0.631	0.693	0.583	0.688	0.636333	0.0184095
21:45:09	0.714	0.694	0.725	0.787	0.678	0.781			0.622	0.602	0.633	0.695	0.586	0.689	0.637833	0.0183765
21:50:09	0.716	0.694	0.727	0.789	0.678	0.784			0.624	0.602	0.635	0.697	0.586	0.692	0.639333	0.0187895
21:55:09	0.717	0.695	0.728	0.79	0.679	0.784			0.625	0.603	0.636	0.698	0.587	0.692	0.640167	0.0186966
22:00:09	0.718	0.696	0.729	0.792	0.68	0.786			0.626	0.604	0.637	0.7	0.588	0.694	0.6415	0.0188922
22:05:09	0.719	0.697	0.73	0.794	0.681	0.786			0.627333	0.605333	0.638333	0.702333	0.589333	0.694333	0.642833	0.0189046
22:10:09	0.721	0.698	0.731	0.796	0.683	0.789			0.629333	0.606333	0.639333	0.704333	0.591333	0.697333	0.644667	0.0190712
22:15:09	0.722	0.7	0.733	0.797	0.684	0.79			0.630333	0.608333	0.641333	0.705333	0.592333	0.698333	0.646	0.0189959
22:20:09	0.724	0.7	0.733	0.797	0.686	0.791			0.632333	0.608333	0.641333	0.705333	0.594333	0.699333	0.646833	0.0188481
22:25:09	0.725	0.701	0.735	0.798	0.687	0.792			0.633333	0.609333	0.643333	0.706333	0.595333	0.700333	0.648	0.0188391
22:30:09	0.727	0.702	0.737	0.801	0.688	0.793			0.635333	0.610333	0.645333	0.709333	0.596333	0.701333	0.649667	0.0190134
22:35:09	0.727	0.704	0.737	0.803	0.688	0.793			0.635333	0.612333	0.645333	0.711333	0.596333	0.701333	0.650333	0.0190893
22:40:09	0.729	0.705	0.738	0.805	0.69	0.797			0.637333	0.613333	0.646333	0.713333	0.598333	0.705333	0.652333	0.019346
22:45:09	0.731	0.705	0.74	0.805	0.693	0.797			0.639333	0.613333	0.648333	0.713333	0.601333	0.705333	0.6535	0.018999
22:50:09	0.731	0.706	0.741	0.806	0.692	0.799			0.639333	0.614333	0.649333	0.714333	0.600333	0.707333	0.654167	0.0193001
22:55:09	0.733	0.708	0.742	0.806	0.692	0.8			0.641333	0.616333	0.650333	0.714333	0.600333	0.708333	0.655167	0.0191979
23:00:09	0.734	0.71	0.744	0.807	0.693	0.802			0.642333	0.618333	0.652333	0.715333	0.601333	0.710333	0.656667	0.0192157
23:05:09	0.735	0.711	0.745	0.808	0.694	0.802			0.643333	0.619333	0.653333	0.716333	0.602333	0.710333	0.6575	0.0191231
23:10:09	0.736	0.712	0.746	0.81	0.695	0.803			0.644333	0.620333	0.654333	0.718333	0.603333	0.711333	0.658667	0.0192261
23:15:09	0.737	0.713	0.747	0.811	0.696	0.804			0.645333	0.621333	0.655333	0.719333	0.604333	0.712333	0.659667	0.0192261
23:20:09	0.738	0.715	0.749	0.813	0.696	0.806			0.646333	0.623333	0.657333	0.721333	0.604333	0.714333	0.661167	0.0194447
23:25:09	0.74	0.716	0.75	0.815	0.698	0.808			0.648333	0.624333	0.658333	0.723333	0.606333	0.716333	0.662833	0.0195171
23:30:09	0.741	0.716	0.752	0.816	0.699	0.809			0.649333	0.624333	0.660333	0.724333	0.607333	0.717333	0.663833	0.0195768
23:35:09	0.744	0.718	0.754	0.818	0.7	0.811			0.652333	0.626333	0.662333	0.726333	0.608333	0.719333	0.665833	0.0196499
23:40:09	0.745	0.719	0.755	0.819	0.7	0.812			0.653333	0.627333	0.663333	0.727333	0.608333	0.720333	0.666667	0.0197479
23:45:09	0.746	0.72	0.756	0.82	0.702	0.813			0.654333	0.628333	0.664333	0.728333	0.610333	0.721333	0.667833	0.0196499
23:50:09	0.748	0.721	0.757	0.821	0.702	0.814			0.656333	0.629333	0.665333	0.729333	0.610333	0.722333	0.668833	0.019726
23:55:09	0.748	0.722	0.758	0.822	0.703	0.816			0.656333	0.630333	0.666333	0.730333	0.611333	0.724333	0.669833	0.0198389
1 day, 0:00:09	0.749	0.723	0.759	0.822	0.706	0.817			0.657333	0.631333	0.667333	0.730333	0.614333	0.725333	0.671	0.0195425
1 day, 0:05:09	0.75	0.724	0.76	0.823	0.706	0.819			0.658333	0.632333	0.668333	0.731333	0.614333	0.727333	0.672	0.0197327
1 day, 0:10:09	0.752	0.724	0.763	0.824	0.706	0.818			0.660333	0.632333	0.671333	0.732333	0.614333	0.726333	0.672833	0.0196837
1 day, 0:15:09	0.753	0.726	0.764	0.825	0.707	0.82			0.661333	0.634333	0.672333	0.733333	0.615333	0.728333	0.674167	0.0197069
1 day, 0:20:09	0.755	0.726	0.765	0.826	0.709	0.822			0.663333	0.634333	0.673333	0.734333	0.617333	0.730333	0.6755	0.0197474
1 day, 0:25:09	0.754	0.728	0.767	0.827	0.71	0.821			0.662333	0.636333	0.675333	0.735333	0.618333	0.729333	0.676167	0.019537
1 day, 0:30:09	0.756	0.73	0.768	0.828	0.711	0.824			0.664333	0.638333	0.676333	0.736333	0.619333	0.732333	0.677833	0.0196295
1 day, 0:35:09	0.757	0.731	0.769	0.829	0.711	0.825			0.665333	0.639333	0.677333	0.737333	0.619333	0.733333	0.678667	0.0197293
1 day, 0:40:09	0.759	0.734	0.771	0.831	0.713	0.826			0.667333	0.642333	0.679333	0.739333	0.621333	0.734333	0.680667	0.0195715
1 day, 0:45:09	0.761	0.735	0.773	0.833	0.714	0.829			0.669333	0.643333	0.681333	0.741333	0.622333	0.737333	0.6825	0.01983
1 day, 0:50:09	0.763	0.736	0.774	0.833	0.715	0.828			0.671333	0.644333	0.682333	0.741333	0.623333	0.736333	0.683167	0.0195268
1 day, 0:55:09	0.763	0.737	0.776	0.835	0.715	0.83			0.671333	0.645333	0.684333	0.743333	0.623333	0.738333	0.684333	0.0198394
1 day, 1:00:09	0.764	0.738	0.776	0.836	0.717	0.83			0.672333	0.646333	0.684333	0.744333	0.625333	0.738333	0.685167	0.0196476
1 day, 1:05:09	0.766	0.74	0.777	0.836	0.718	0.831			0.674333	0.648333	0.685333	0.744333	0.626333	0.739333	0.686333	0.0194611
1 day, 1:10:09	0.768	0.742	0.78	0.838	0.72	0.833			0.676333	0.650333	0.688333	0.746333	0.628333	0.741333	0.6885	0.0194601
1 day, 1:15:09	0.769	0.743	0.781	0.838	0.72	0.834			0.677667	0.651667	0.689667	0.746667	0.628667	0.742667	0.6895	0.0194652
1 day, 1:20:09	0.769	0.743	0.782	0.839	0.721	0.836			0.677667	0.651667	0.690667	0.747667	0.629667	0.744667	0.690333	0.0196429
1 day, 1:25:09	0.77	0.745	0.783	0.84	0.722	0.838			0.678333	0.653333	0.691333	0.748333	0.630333	0.746333	0.691333	0.0196706
1 day, 1:30:09	0.772	0.747	0.784	0.84	0.723	0.839			0.680667	0.655667	0.692667	0.748667	0.631667	0.747667	0.692833	0.0194892
1 day, 1:35:09	0.772	0.749	0.786	0.841	0.724	0.84			0.680667	0.657667	0.694667	0.749667	0.632667	0.748667	0.694	0.0194485
1 day, 1:40:09	0.773	0.75	0.787	0.842	0.725	0.84			0.681667	0.658667	0.695667	0.750667	0.633667	0.748667	0.694833	0.0193553
1 day, 1:45:09	0.775	0.752	0.788	0.842	0.726	0.841			0.683667	0.660667	0.696667	0.750667	0.634667	0.749667	0.696	0.0191758
1 day, 1:50:09	0.776	0.754	0.79	0.843	0.726	0.844			0.684667	0.662667	0.698667	0.751667	0.634667	0.752667	0.6975	0.0194121
1 day, 1:55:09	0.778	0.756	0.792	0.844	0.727	0.844			0.686667	0.664667	0.700667	0.752667	0.635667	0.752667	0.698833	0.0192396
1 day, 2:00:09	0.779	0.756	0.793	0.846	0.727	0.846			0.687667	0.664667	0.701667	0.754667	0.635667	0.754667	0.699833	0.0195949
1 day, 2:05:09	0.781	0.757	0.794	0.848	0.729	0.847			0.689667	0.665667	0.702667	0.756667	0.637667	0.755667	0.701333	0.0195596
1 day, 2:10:09	0.781	0.759	0.796	0.85	0.73	0.849			0.689667	0.667667	0.704667	0.758667	0.638667	0.757667	0.702833	0.0197103
1 day, 2:15:09	0.783	0.761	0.798	0.852	0.731	0.85			0.691667	0.669667	0.706667	0.760667	0.639667	0.758667	0.7045	0.0197272
1 day, 2:20:09	0.785	0.762	0.799	0.852	0.732	0.851			0.693667	0.670667	0.707667	0.760667	0.640667	0.759667	0.7055	0.0196119
1 day, 2:25:09	0.786	0.762	0.8	0.852	0.733	0.854			0.694667	0.670667	0.708667	0.760667	0.641667	0.762667	0.7065	0.019766
1 day, 2:30:09	0.787	0.763	0.801	0.851	0.733	0.855			0.695667	0.671667	0.709667	0.759667	0.641667	0.763667	0.707	0.0196955
1 day, 2:35:09	0.788	0.765	0.802	0.851	0.733	0.856			0.696667	0.673667	0.710667	0.759667	0.641667	0.764667	0.707833	0.0196595
1 day, 2:40:09	0.79	0.767	0.805	0.852	0.736	0.858			0.698667	0.675667	0.713667	0.760667	0.644667	0.766667	0.71	0.0194656
1 day, 2:45:09	0.792	0.769	0.807	0.852	0.738	0.859			0.700667	0.677667	0.715667	0.760667	0.646667	0.767667	0.7115	0.0191962
1 day, 2:50:09	0.793	0.77	0.808	0.852	0.738	0.86			0.701667	0.678667	0.716667	0.760667	0.646667	0.768667	0.712167	0.0192246
1 day, 2:55:09	0.793	0.77	0.808	0.854	0.738	0.861			0.701667	0.678667	0.716667	0.762667	0.646667	0.769667	0.712667	0.0194919
1 day, 3:00:09	0.794	0.772	0.81	0.856	0.739	0.861			0.702667	0.680667	0.718667	0.764667	0.647667	0.769667	0.714	0.0194314
1 day, 3:05:09	0.795	0.774	0.812	0.857	0.74	0.862			0.703667	0.682667	0.720667	0.765667	0.648667	0.770667	0.715333	0.0193833
1 day, 3:10:09	0.797	0.775	0.813	0.858	0.741	0.865			0.705667	0.683667	0.721667	0.766667	0.649667	0.773667	0.716833	0.0195558
1 day, 3:15:09	0.797	0.777	0.813	0.858	0.742	0.866			0.705667	0.685667	0.721667	0.766667	0.650667	0.774667	0.7175	0.0194275
1 day, 3:20:09	0.798	0.779	0.816	0.858	0.743	0.867			0.706667	0.687667	0.724667	0.766667	0.651667	0.775667	0.718833	0.019307
1 day, 3:25:09	0.799	0.78	0.817	0.858	0.745	0.869			0.707667	0.688667	0.725667	0.766667	0.653667	0.777667	0.72	0.0192088
1 day, 3:30:09	0.801	0.782	0.819	0.857	0.746	0.87			0.709667	0.690667	0.727667	0.765667	0.654667	0.778667	0.721167	0.0189855
1 day, 3:35:09	0.801	0.783	0.821	0.858	0.747	0.872			0.709667	0.691667	0.729667	0.766667	0.655667	0.780667	0.722333	0.0191201
1 day, 3:40:09	0.803	0.782	0.822	0.861	0.748	0.873			0.711667	0.690667	0.730667	0.769667	0.656667	0.781667	0.7235	0.0193656
1 day, 3:45:09	0.804	0.785	0.824	0.861	0.75	0.876			0.712667	0.693667	0.732667	0.769667	0.658667	0.784667	0.725333	0.0192764
1 day, 3:50:09	0.805	0.787	0.826	0.86	0.75	0.878			0.713667	0.695667	0.734667	0.768667	0.658667	0.786667	0.726333	0.0193057
1 day, 3:55:09	0.806	0.789	0.827	0.86	0.751	0.879			0.714667	0.697667	0.735667	0.768667	0.659667	0.787667	0.727333	0.019181
1 day, 4:00:09	0.806	0.789	0.828	0.861	0.753	0.882			0.714667	0.697667	0.736667	0.769667	0.661667	0.790667	0.7285	0.0193519
1 day, 4:05:09	0.808	0.791	0.829	0.864	0.754	0.883			0.716667	0.699667	0.737667	0.772667	0.662667	0.791667	0.730167	0.0194195
1 day, 4:10:09	0.809	0.792	0.831	0.867	0.757	0.883			0.717667	0.700667	0.739667	0.775667	0.665667	0.791667	0.731833	0.0192465
1 day, 4:15:09	0.811	0.794	0.832	0.87	0.759	0.885			0.719667	0.702667	0.740667	0.778667	0.667667	0.793667	0.733833	0.0193105
1 day, 4:20:09	0.812	0.796	0.834	0.872	0.76	0.887			0.720667	0.704667	0.742667	0.780667	0.668667	0.795667	0.7355	0.0194498
1 day, 4:25:09	0.814	0.797	0.835	0.872	0.76	0.89			0.722667	0.705667	0.743667	0.780667	0.668667	0.798667	0.736667	0.0196723
1 day, 4:30:09	0.815	0.798	0.837	0.873	0.763	0.891			0.723667	0.706667	0.745667	0.781667	0.671667	0.799667	0.738167	0.0194555
1 day, 4:35:09	0.816	0.798	0.839	0.873	0.764	0.893			0.724667	0.706667	0.747667	0.781667	0.672667	0.801667	0.739167	0.0195563
1 day, 4:40:09	0.817	0.799	0.841	0.87	0.764	0.894			0.725667	0.707667	0.749667	0.778667	0.672667	0.802667	0.7395	0.0194069
1 day, 4:45:09	0.818	0.8	0.841	0.867	0.765	0.896			0.726667	0.708667	0.749667	0.775667	0.673667	0.804667	0.739833	0.0192413
1 day, 4:50:09	0.819	0.803	0.843	0.865	0.768	0.897			0.727667	0.711667	0.751667	0.773667	0.676667	0.805667	0.741167	0.0187434
1 day, 4:55:09	0.82	0.805	0.843	0.867	0.769	0.898			0.728667	0.713667	0.751667	0.775667	0.677667	0.806667	0.742333	0.0187326
1 day, 5:00:09	0.821	0.806	0.844	0.869	0.771	0.899			0.729667	0.714667	0.752667	0.777667	0.679667	0.807667	0.743667	0.018678
1 day, 5:05:09	0.822	0.808	0.846	0.87	0.773	0.901			0.730667	0.716667	0.754667	0.778667	0.681667	0.809667	0.745333	0.0186434
1 day, 5:10:08	0.823	0.81	0.848	0.868	0.775	0.901			0.731667	0.718667	0.756667	0.776667	0.683667	0.809667	0.746167	0.0182076
1 day, 5:15:09	0.824	0.812	0.849	0.869	0.776	0.903			0.732667	0.720667	0.757667	0.777667	0.684667	0.811667	0.7475	0.0182746
1 day, 5:20:09	0.826	0.812	0.849	0.872	0.778	0.904			0.734667	0.720667	0.757667	0.780667	0.686667	0.812667	0.748833	0.0182801
1 day, 5:25:09	0.828	0.812	0.852	0.875	0.78	0.906			0.736667	0.720667	0.760667	0.783667	0.688667	0.814667	0.750833	0.0184615
1 day, 5:30:09	0.83	0.814	0.854	0.874	0.782	0.907			0.738667	0.722667	0.762667	0.782667	0.690667	0.815667	0.752167	0.0181728
1 day, 5:35:09	0.833	0.815	0.855	0.873	0.783	0.908			0.741667	0.723667	0.763667	0.781667	0.691667	0.816667	0.753167	0.018018
1 day, 5:40:09	0.834	0.816	0.855	0.874	0.784	0.909			0.742667	0.724667	0.763667	0.782667	0.692667	0.817667	0.754	0.0179994
1 day, 5:45:09	0.835	0.816	0.856	0.876	0.785	0.912			0.743667	0.724667	0.764667	0.784667	0.693667	0.820667	0.755333	0.0183442
1 day, 5:50:09	0.837	0.819	0.859	0.876	0.786	0.911			0.745667	0.727667	0.767667	0.784667	0.694667	0.819667	0.756667	0.0179629
1 day, 5:55:09	0.839	0.822	0.861	0.877	0.787	0.912			0.747667	0.730667	0.769667	0.785667	0.695667	0.820667	0.758333	0.0178581
1 day, 6:00:09	0.841	0.823	0.863	0.879	0.789	0.915			0.749667	0.731667	0.771667	0.787667	0.697667	0.823667	0.760333	0.0180271
1 day, 6:05:09	0.843	0.824	0.863	0.881	0.79	0.916			0.751667	0.732667	0.771667	0.789667	0.698667	0.824667	0.7615	0.0180396
1 day, 6:10:09	0.845	0.825	0.862	0.883	0.793	0.917			0.753667	0.733667	0.770667	0.791667	0.701667	0.825667	0.762833	0.0178109
1 day, 6:15:09	0.846	0.827	0.865	0.884	0.794	0.918			0.754667	0.735667	0.773667	0.792667	0.702667	0.826667	0.764333	0.0177889
1 day, 6:20:09	0.847	0.827	0.867	0.885	0.795	0.919			0.755667	0.735667	0.775667	0.793667	0.703667	0.827667	0.765333	0.0178618
1 day, 6:25:09	0.848	0.828	0.868	0.886	0.798	0.922			0.756667	0.736667	0.776667	0.794667	0.706667	0.830667	0.767	0.0178693
1 day, 6:30:09	0.85	0.829	0.869	0.887	0.799	0.923			0.758667	0.737667	0.777667	0.795667	0.707667	0.831667	0.768167	0.0178508
1 day, 6:35:09	0.852	0.831	0.871	0.887	0.801	0.924			0.760667	0.739667	0.779667	0.795667	0.709667	0.832667	0.769667	0.0176314
1 day, 6:40:09	0.854	0.832	0.872	0.889	0.802	0.925			0.762667	0.740667	0.780667	0.797667	0.710667	0.833667	0.771	0.0176648
1 day, 6:45:09	0.854	0.832	0.874	0.891	0.805	0.926			0.762667	0.740667	0.782667	0.799667	0.713667	0.834667	0.772333	0.0175853
1 day, 6:50:09	0.855	0.833	0.875	0.892	0.805	0.927			0.763667	0.741667	0.783667	0.800667	0.713667	0.835667	0.773167	0.017697
1 day, 6:55:09	0.856	0.834	0.876	0.894	0.808	0.928			0.764667	0.742667	0.784667	0.802667	0.716667	0.836667	0.774667	0.0175271
1 day, 7:00:09	0.859	0.835	0.877	0.894	0.81	0.93			0.767667	0.743667	0.785667	0.802667	0.718667	0.838667	0.776167	0.0174485
1 day, 7:05:09	0.858	0.836	0.876	0.895	0.811	0.929			0.766667	0.744667	0.784667	0.803667	0.719667	0.837667	0.776167	0.01721
1 day, 7:10:09	0.859	0.838	0.878	0.895	0.813	0.931			0.767667	0.746667	0.786667	0.803667	0.721667	0.839667	0.777667	0.017125
1 day, 7:15:09	0.86	0.839	0.879	0.894	0.813	0.932			0.768667	0.747667	0.787667	0.802667	0.721667	0.840667	0.778167	0.0171362
1 day, 7:20:09	0.861	0.841	0.88	0.891	0.813	0.933			0.769667	0.749667	0.788667	0.799667	0.721667	0.841667	0.7785	0.0170106
1 day, 7:25:09	0.862	0.842	0.882	0.89	0.814	0.934			0.770667	0.750667	0.790667	0.798667	0.722667	0.842667	0.779333	0.0169522
1 day, 7:30:09	0.862	0.843	0.881	0.888	0.815	0.934			0.770667	0.751667	0.789667	0.796667	0.723667	0.842667	0.779167	0.0166908
1 day, 7:35:09	0.862	0.844	0.884	0.891	0.816	0.936			0.770667	0.752667	0.792667	0.799667	0.724667	0.844667	0.780833	0.0169517
1 day, 7:40:09	0.863	0.844	0.883	0.893	0.816	0.938			0.771667	0.752667	0.791667	0.801667	0.724667	0.846667	0.7815	0.0172384
1 day, 7:45:09	0.864	0.844	0.884	0.896	0.818	0.938			0.772667	0.752667	0.792667	0.804667	0.726667	0.846667	0.782667	0.0171425
1 day, 7:50:09	0.865	0.845	0.885	0.897	0.819	0.939			0.773667	0.753667	0.793667	0.805667	0.727667	0.847667	0.783667	0.0171425
1 day, 7:55:09	0.864	0.848	0.886	0.896	0.819	0.94			0.772667	0.756667	0.794667	0.804667	0.727667	0.848667	0.784167	0.0170992
1 day, 8:00:09	0.866	0.848	0.887	0.899	0.82	0.941			0.774667	0.756667	0.795667	0.807667	0.728667	0.849667	0.7855	0.0172151
1 day, 8:05:09	0.867	0.848	0.888	0.906	0.821	0.942			0.775667	0.756667	0.796667	0.814667	0.729667	0.850667	0.787333	0.0175569
1 day, 8:10:09	0.867	0.848	0.888	0.908	0.822	0.943			0.775667	0.756667	0.796667	0.816667	0.730667	0.851667	0.788	0.0176742
1 day, 8:15:09	0.868	0.85	0.89	0.908	0.822	0.944			0.776667	0.758667	0.798667	0.816667	0.730667	0.852667	0.789	0.0176893
1 day, 8:20:09	0.868	0.85	0.891	0.912	0.823	0.943			0.776667	0.758667	0.799667	0.820667	0.731667	0.851667	0.789833	0.0177001
1 day, 8:25:09	0.869	0.849	0.891	0.913	0.825	0.945			0.777667	0.757667	0.799667	0.821667	0.733667	0.853667	0.790667	0.017812
1 day, 8:30:09	0.869	0.85	0.892	0.914	0.829	0.947			0.777667	0.758667	0.800667	0.822667	0.737667	0.855667	0.792167	0.0176423
1 day, 8:35:09	0.87	0.853	0.893	0.915	0.83	0.948			0.778667	0.761667	0.801667	0.823667	0.738667	0.856667	0.7935	0.0175184
1 day, 8:40:09	0.87	0.852	0.893	0.916	0.83	0.949			0.778667	0.760667	0.801667	0.824667	0.738667	0.857667	0.793667	0.0177576
1 day, 8:45:09	0.872	0.852	0.894	0.918	0.831	0.95			0.780667	0.760667	0.802667	0.826667	0.739667	0.858667	0.794833	0.017852
1 day, 8:50:09	0.871	0.852	0.895	0.918	0.832	0.949			0.779667	0.760667	0.803667	0.826667	0.740667	0.857667	0.794833	0.0176737
1 day, 8:55:09	0.871	0.854	0.896	0.918	0.832	0.949			0.779667	0.762667	0.804667	0.826667	0.740667	0.857667	0.795333	0.0175645
1 day, 9:00:09	0.873	0.855	0.897	0.919	0.835	0.95			0.781667	0.763667	0.805667	0.827667	0.743667	0.858667	0.796833	0.017329
1 day, 9:05:09	0.871	0.855	0.897	0.919	0.835	0.95			0.779667	0.763667	0.805667	0.827667	0.743667	0.858667	0.7965	0.0173905
1 day, 9:10:09	0.874	0.855	0.898	0.918	0.836	0.953			0.782667	0.763667	0.806667	0.826667	0.744667	0.861667	0.797667	0.0175195
1 day, 9:15:09	0.874	0.856	0.898	0.92	0.839	0.952			0.782667	0.764667	0.806667	0.828667	0.747667	0.860667	0.7985	0.0171472
1 day, 9:20:09	0.874	0.857	0.899	0.92	0.841	0.952			0.782667	0.765667	0.807667	0.828667	0.749667	0.860667	0.799167	0.0169012
1 day, 9:25:09	0.875	0.857	0.9	0.921	0.843	0.955			0.784	0.766	0.809	0.83	0.752	0.864	0.800833	0.0171161
1 day, 9:30:09	0.875	0.857	0.9	0.922	0.843	0.954			0.783667	0.765667	0.808667	0.830667	0.751667	0.862667	0.8005	0.0170517
1 day, 9:35:09	0.876	0.859	0.902	0.922	0.844	0.956			0.784667	0.767667	0.810667	0.830667	0.752667	0.864667	0.801833	0.0170654
1 day, 9:40:09	0.877	0.859	0.903	0.922	0.845	0.956			0.785667	0.767667	0.811667	0.830667	0.753667	0.864667	0.802333	0.0169542
1 day, 9:45:09	0.877	0.859	0.904	0.922	0.845	0.956			0.786333	0.768333	0.813333	0.831333	0.754333	0.865333	0.803167	0.0169733
1 day, 9:50:09	0.878	0.86	0.903	0.924	0.847	0.957			0.786667	0.768667	0.811667	0.832667	0.755667	0.865667	0.8035	0.0168986
1 day, 9:55:09	0.879	0.861	0.904	0.926	0.848	0.957			0.788	0.77	0.813	0.835	0.757	0.866	0.804833	0.0168353
1 day, 10:00:09	0.878	0.862	0.905	0.928	0.848	0.958			0.787	0.771	0.814	0.837	0.757	0.867	0.8055	0.0170602
1 day, 10:05:09	0.878	0.863	0.906	0.927	0.849	0.959			0.787	0.772	0.815	0.836	0.758	0.868	0.806	0.0169765
1 day, 10:10:09	0.879	0.862	0.906	0.926	0.85	0.959			0.788	0.771	0.815	0.835	0.759	0.868	0.806	0.0168563
1 day, 10:15:09	0.881	0.864	0.907	0.924	0.852	0.96			0.79	0.773	0.816	0.833	0.761	0.869	0.807	0.0164944
1 day, 10:20:09	0.881	0.864	0.908	0.923	0.852	0.96			0.79	0.773	0.817	0.832	0.761	0.869	0.807	0.0164621
1 day, 10:25:09	0.882	0.863	0.908	0.923	0.853	0.961			0.790667	0.771667	0.816667	0.831667	0.761667	0.869667	0.807	0.0165321
1 day, 10:30:09	0.882	0.864	0.908	0.925	0.854	0.962			0.790667	0.772667	0.816667	0.833667	0.762667	0.870667	0.807833	0.016598
1 day, 10:35:09	0.882	0.864	0.91	0.927	0.856	0.964			0.791	0.773	0.819	0.836	0.765	0.873	0.8095	0.0168122
1 day, 10:40:09	0.882	0.866	0.91	0.928	0.856	0.966			0.791	0.775	0.819	0.837	0.765	0.875	0.810333	0.0169758
1 day, 10:45:09	0.883	0.867	0.911	0.928	0.856	0.965			0.791667	0.775667	0.819667	0.836667	0.764667	0.873667	0.810333	0.0167604
1 day, 10:50:09	0.883	0.867	0.911	0.927	0.856	0.964			0.792	0.776	0.82	0.836	0.765	0.873	0.810333	0.0165825
1 day, 10:55:09	0.884	0.868	0.91	0.927	0.857	0.965			0.793333	0.777333	0.819333	0.836333	0.766333	0.874333	0.811167	0.0164953
1 day, 11:00:09	0.885	0.868	0.91	0.928	0.857	0.967			0.794333	0.777333	0.819333	0.837333	0.766333	0.876333	0.811833	0.0167665
1 day, 11:05:09	0.884	0.868	0.911	0.931	0.858	0.968			0.793333	0.777333	0.820333	0.840333	0.767333	0.877333	0.812667	0.0170131
1 day, 11:10:09	0.885	0.868	0.913	0.933	0.859	0.968			0.794	0.777	0.822	0.842	0.768	0.877	0.813333	0.0170287
1 day, 11:15:09	0.885	0.87	0.913	0.934	0.859	0.969			0.794333	0.779333	0.822333	0.843333	0.768333	0.878333	0.814333	0.0170704
1 day, 11:20:09	0.886	0.87	0.913	0.934	0.859	0.969			0.795333	0.779333	0.822333	0.843333	0.768333	0.878333	0.8145	0.0170322
1 day, 11:25:09	0.886	0.869	0.914	0.932	0.86	0.971			0.795333	0.778333	0.823333	0.841333	0.769333	0.880333	0.814667	0.017173
1 day, 11:30:09	0.886	0.869	0.914	0.931	0.861	0.972			0.795	0.778	0.823	0.84	0.77	0.881	0.8145	0.0171634
1 day, 11:35:09	0.886	0.87	0.914	0.932	0.861	0.976			0.795333	0.779333	0.823333	0.841333	0.770333	0.885333	0.815833	0.017663
1 day, 11:40:09	0.887	0.871	0.916	0.932	0.862	0.975			0.796333	0.780333	0.825333	0.841333	0.771333	0.884333	0.8165	0.0173694
1 day, 11:45:09	0.887	0.873	0.916	0.934	0.863	0.975			0.796	0.782	0.825	0.843	0.772	0.884	0.817	0.0172434
1 day, 11:50:09	0.888	0.873	0.917	0.933	0.863	0.974			0.797333	0.782333	0.826333	0.842333	0.772333	0.883333	0.817333	0.0170411
1 day, 11:55:09	0.888	0.872	0.917	0.934	0.864	0.976			0.797333	0.781333	0.826333	0.843333	0.773333	0.885333	0.817833	0.0173316
1 day, 12:00:09	0.888	0.874	0.917	0.933	0.864	0.977			0.797333	0.783333	0.826333	0.842333	0.773333	0.886333	0.818167	0.017277
1 day, 12:05:09	0.889	0.874	0.918	0.933	0.863	0.977			0.798333	0.783333	0.827333	0.842333	0.772333	0.886333	0.818333	0.0173417
1 day, 12:10:09	0.89	0.875	0.919	0.933	0.864	0.98			0.799333	0.784333	0.828333	0.842333	0.773333	0.889333	0.8195	0.0175602
1 day, 12:15:09	0.89	0.874	0.919	0.935	0.866	0.979			0.799333	0.783333	0.828333	0.844333	0.775333	0.888333	0.819833	0.0174141
1 day, 12:20:09	0.89	0.874	0.919	0.936	0.867	0.979			0.799333	0.783333	0.828333	0.845333	0.776333	0.888333	0.820167	0.017377
1 day, 12:25:09	0.892	0.876	0.92	0.937	0.868	0.979			0.801333	0.785333	0.829333	0.846333	0.777333	0.888333	0.821333	0.0171367
1 day, 12:30:09	0.892	0.876	0.92	0.938	0.869	0.981			0.801333	0.785333	0.829333	0.847333	0.778333	0.890333	0.822	0.0173622
1 day, 12:35:09	0.894	0.877	0.921	0.939	0.868	0.982			0.803333	0.786333	0.830333	0.848333	0.777333	0.891333	0.822833	0.0174943
1 day, 12:40:09	0.894	0.877	0.922	0.939	0.869	0.983			0.803333	0.786333	0.831333	0.848333	0.778333	0.892333	0.823333	0.0175537
1 day, 12:45:09	0.895	0.878	0.924	0.94	0.87	0.984			0.804333	0.787333	0.833333	0.849333	0.779333	0.893333	0.8245	0.0175697
1 day, 12:50:09	0.896	0.879	0.924	0.94	0.87	0.985			0.805333	0.788333	0.833333	0.849333	0.779333	0.894333	0.825	0.0175929
1 day, 12:55:09	0.897	0.879	0.925	0.937	0.871	0.985			0.806333	0.788333	0.834333	0.846333	0.780333	0.894333	0.825	0.0173564
1 day, 13:00:09	0.898	0.878	0.926	0.937	0.871	0.984			0.807333	0.787333	0.835333	0.846333	0.780333	0.893333	0.825	0.0172794
1 day, 13:05:09	0.898	0.88	0.926	0.939	0.871	0.984			0.807333	0.789333	0.835333	0.848333	0.780333	0.893333	0.825667	0.0172214
1 day, 13:10:09	0.899	0.881	0.927	0.94	0.871	0.986			0.808667	0.790667	0.836667	0.849667	0.780667	0.895667	0.827	0.0174407
1 day, 13:15:09	0.9	0.88	0.928	0.941	0.871	0.986			0.809333	0.789333	0.837333	0.850333	0.780333	0.895333	0.827	0.0175398
1 day, 13:20:09	0.9	0.88	0.927	0.94	0.873	0.986			0.809	0.789	0.836	0.849	0.782	0.895	0.826667	0.0173025
1 day, 13:25:09	0.9	0.882	0.928	0.938	0.872	0.987			0.809333	0.791333	0.837333	0.847333	0.781333	0.896333	0.827167	0.0173175
1 day, 13:30:09	0.902	0.881	0.93	0.938	0.874	0.988			0.811333	0.790333	0.839333	0.847333	0.783333	0.897333	0.828167	0.0173213
1 day, 13:35:09	0.902	0.881	0.93	0.94	0.873	0.988			0.811333	0.790333	0.839333	0.849333	0.782333	0.897333	0.828333	0.0174852
1 day, 13:40:09	0.902	0.883	0.93	0.942	0.872	0.988			0.811333	0.792333	0.839333	0.851333	0.781333	0.897333	0.828833	0.0175152
1 day, 13:45:09	0.903	0.883	0.93	0.942	0.873	0.988			0.812333	0.792333	0.839333	0.851333	0.782333	0.897333	0.829167	0.0173924
1 day, 13:50:09	0.904	0.884	0.931	0.944	0.875	0.99			0.813333	0.793333	0.840333	0.853333	0.784333	0.899333	0.830667	0.017477
1 day, 13:55:09	0.904	0.885	0.931	0.943	0.875	0.99			0.813667	0.794667	0.840667	0.852667	0.784667	0.899667	0.831	0.0173641
1 day, 14:00:09	0.905	0.884	0.93	0.943	0.874	0.991			0.814667	0.793667	0.839667	0.852667	0.783667	0.900667	0.830833	0.0176057
1 day, 14:05:09	0.906	0.885	0.932	0.944	0.875	0.989			0.815333	0.794333	0.841333	0.853333	0.784333	0.898333	0.831167	0.0172306
1 day, 14:10:09	0.907	0.885	0.933	0.946	0.877	0.99			0.816333	0.794333	0.842333	0.855333	0.786333	0.899333	0.832333	0.0172569
1 day, 14:15:09	0.907	0.887	0.933	0.947	0.877	0.991			0.816667	0.796667	0.842667	0.856667	0.786667	0.900667	0.833333	0.0172871
1 day, 14:20:09	0.908	0.888	0.932	0.948	0.876	0.991			0.817333	0.797333	0.841333	0.857333	0.785333	0.900333	0.833167	0.0173059
1 day, 14:25:09	0.909	0.888	0.934	0.947	0.877	0.992			0.818333	0.797333	0.843333	0.856333	0.786333	0.901333	0.833833	0.0173027
1 day, 14:30:09	0.909	0.89	0.935	0.945	0.879	0.993			0.818667	0.799667	0.844667	0.854667	0.788667	0.902667	0.834833	0.0170498
1 day, 14:35:09	0.909	0.889	0.934	0.945	0.88	0.993			0.818333	0.798333	0.843333	0.854333	0.789333	0.902333	0.834333	0.0170118
1 day, 14:40:09	0.909	0.889	0.935	0.947	0.879	0.993			0.818333	0.798333	0.844333	0.856333	0.788333	0.902333	0.834667	0.0172001
1 day, 14:45:09	0.91	0.889	0.936	0.947	0.88	0.993			0.819333	0.798333	0.845333	0.856333	0.789333	0.902333	0.835167	0.0170986
1 day, 14:50:09	0.911	0.89	0.939	0.948	0.882	0.994			0.820667	0.799667	0.848667	0.857667	0.791667	0.903667	0.837	0.0170522
1 day, 14:55:09	0.911	0.889	0.939	0.947	0.881	0.994			0.820333	0.798333	0.848333	0.856333	0.790333	0.903333	0.836167	0.0171744
1 day, 15:00:09	0.912	0.89	0.94	0.946	0.881	0.994			0.821667	0.799667	0.849667	0.855667	0.790667	0.903667	0.836833	0.0170576
1 day, 15:05:09	0.911	0.891	0.941	0.947	0.88	0.994			0.820667	0.800667	0.850667	0.856667	0.789667	0.903667	0.837	0.017171
1 day, 15:10:09	0.913	0.892	0.943	0.947	0.882	0.994			0.822333	0.801333	0.852333	0.856333	0.791333	0.903333	0.837833	0.0169091
1 day, 15:15:09	0.914	0.891	0.943	0.947	0.883	0.993			0.823333	0.800333	0.852333	0.856333	0.792333	0.902333	0.837833	0.0167327
1 day, 15:20:09	0.915	0.892	0.942	0.947	0.883	0.993			0.824333	0.801333	0.851333	0.856333	0.792333	0.902333	0.838	0.0166025
1 day, 15:25:09	0.916	0.892	0.943	0.946	0.883	0.995			0.825333	0.801333	0.852333	0.855333	0.792333	0.904333	0.8385	0.0168274
1 day, 15:30:09	0.917	0.893	0.944	0.947	0.881	0.997			0.826333	0.802333	0.853333	0.856333	0.790333	0.906333	0.839167	0.0172364
1 day, 15:35:09	0.918	0.893	0.944	0.949	0.88	0.996			0.827333	0.802333	0.853333	0.858333	0.789333	0.905333	0.839333	0.0172492
1 day, 15:40:09	0.919	0.894	0.946	0.948	0.883	0.995			0.828333	0.803333	0.855333	0.857333	0.792333	0.904333	0.840167	0.0167599
1 day, 15:45:09	0.918	0.896	0.946	0.947	0.884	0.996			0.827667	0.805667	0.855667	0.856667	0.793667	0.905667	0.840833	0.0166421
1 day, 15:50:09	0.919	0.896	0.947	0.946	0.884	0.995			0.828333	0.805333	0.856333	0.855333	0.793333	0.904333	0.8405	0.0164872
1 day, 15:55:09	0.92	0.897	0.948	0.945	0.885	0.998			0.829333	0.806333	0.857333	0.854333	0.794333	0.907333	0.8415	0.0166921
1 day, 16:00:09	0.921	0.895	0.948	0.947	0.886	0.999			0.830667	0.804667	0.857667	0.856667	0.795667	0.908667	0.842333	0.016905
1 day, 16:05:09	0.92	0.895	0.948	0.948	0.885	0.999			0.829333	0.804333	0.857333	0.857333	0.794333	0.908333	0.841833	0.0170504
1 day, 16:10:09	0.921	0.898	0.949	0.947	0.886	0.999			0.830667	0.807667	0.858667	0.856667	0.795667	0.908667	0.843	0.0167186
1 day, 16:15:09	0.921	0.899	0.948	0.947	0.886	0.998			0.830333	0.808333	0.857333	0.856333	0.795333	0.907333	0.8425	0.0164872
1 day, 16:20:09	0.921	0.9	0.949	0.948	0.885	0.998			0.830333	0.809333	0.858333	0.857333	0.794333	0.907333	0.842833	0.0165746
1 day, 16:25:09	0.922	0.9	0.949	0.947	0.885	0.999			0.831667	0.809667	0.858667	0.856667	0.794667	0.908667	0.843333	0.0166527
1 day, 16:30:09	0.922	0.899	0.949	0.947	0.886	1			0.831667	0.808667	0.858667	0.856667	0.795667	0.909667	0.8435	0.0167559
1 day, 16:35:09	0.922	0.899	0.95	0.948	0.886	1			0.831333	0.808333	0.859333	0.857333	0.795333	0.909333	0.8435	0.0168135
1 day, 16:40:09	0.923	0.901	0.95	0.949	0.886	1			0.832333	0.810333	0.859333	0.858333	0.795333	0.909333	0.844167	0.0166802
1 day, 16:45:09	0.925	0.902	0.951	0.949	0.886	0.999			0.834667	0.811667	0.860667	0.858667	0.795667	0.908667	0.845	0.0164695
1 day, 16:50:09	0.925	0.903	0.952	0.95	0.887	1			0.834667	0.812667	0.861667	0.859667	0.796667	0.909667	0.845833	0.0164912
1 day, 16:55:09	0.925	0.904	0.952	0.95	0.887	1.001			0.834333	0.813333	0.861333	0.859333	0.796333	0.910333	0.845833	0.0165545
1 day, 17:00:09	0.924	0.903	0.952	0.951	0.887	1.001			0.833667	0.812667	0.861667	0.860667	0.796667	0.910667	0.846	0.0166727
1 day, 17:05:09	0.924	0.902	0.952	0.951	0.887	1.002			0.833667	0.811667	0.861667	0.860667	0.796667	0.911667	0.846	0.0168694
1 day, 17:10:09	0.925	0.904	0.954	0.952	0.887	1			0.834333	0.813333	0.863333	0.861333	0.796333	0.909333	0.846333	0.0165489
1 day, 17:15:09	0.924	0.905	0.953	0.952	0.887	1.002			0.833667	0.814667	0.862667	0.861667	0.796667	0.911667	0.846833	0.016732
1 day, 17:20:09	0.924	0.905	0.954	0.951	0.888	1.002			0.833333	0.814333	0.863333	0.860333	0.797333	0.911333	0.846667	0.0166366
1 day, 17:25:09	0.923	0.906	0.953	0.95	0.887	1.002			0.832667	0.815667	0.862667	0.859667	0.796667	0.911667	0.8465	0.0166401
1 day, 17:30:09	0.923	0.904	0.955	0.95	0.888	1.004			0.832333	0.813333	0.864333	0.859333	0.797333	0.913333	0.846667	0.0169974
1 day, 17:35:09	0.924	0.905	0.955	0.951	0.888	1.004			0.833667	0.814667	0.864667	0.860667	0.797667	0.913667	0.8475	0.0169301
1 day, 17:40:09	0.925	0.905	0.956	0.951	0.888	1.002			0.834667	0.814667	0.865667	0.860667	0.797667	0.911667	0.8475	0.0166802
1 day, 17:45:09	0.926	0.905	0.956	0.952	0.889	1.003			0.835667	0.814667	0.865667	0.861667	0.798667	0.912667	0.848167	0.0167108
1 day, 17:50:09	0.926	0.905	0.956	0.952	0.889	1.005			0.835333	0.814333	0.865333	0.861333	0.798333	0.914333	0.848167	0.0169694
1 day, 17:55:09	0.926	0.906	0.957	0.953	0.89	1.004			0.835333	0.815333	0.866333	0.862333	0.799333	0.913333	0.848667	0.0167365
1 day, 18:00:09	0.926	0.907	0.958	0.953	0.888	1.005			0.836	0.817	0.868	0.863	0.798	0.915	0.8495	0.0170348
1 day, 18:05:09	0.927	0.907	0.959	0.952	0.89	1.005			0.836667	0.816667	0.868667	0.861667	0.799667	0.914667	0.849667	0.0168206
1 day, 18:10:09	0.928	0.906	0.959	0.952	0.888	1.004			0.837667	0.815667	0.868667	0.861667	0.797667	0.913667	0.849167	0.0169347
1 day, 18:15:09	0.928	0.909	0.961	0.952	0.889	1.006			0.837333	0.818333	0.870333	0.861333	0.798333	0.915333	0.850167	0.0169733
1 day, 18:20:09	0.929	0.909	0.96	0.951	0.888	1.006			0.838667	0.818667	0.869667	0.860667	0.797667	0.915667	0.850167	0.0169917
1 day, 18:25:09	0.93	0.909	0.961	0.951	0.888	1.006			0.84	0.819	0.871	0.861	0.798	0.916	0.850833	0.0170087
1 day, 18:30:09	0.93	0.911	0.96	0.951	0.89	1.006			0.839667	0.820667	0.869667	0.860667	0.799667	0.915667	0.851	0.0166406
1 day, 18:35:09	0.93	0.911	0.962	0.951	0.89	1.007			0.839667	0.820667	0.871667	0.860667	0.799667	0.916667	0.8515	0.0168472
1 day, 18:40:09	0.931	0.912	0.962	0.953	0.891	1.007			0.840333	0.821333	0.871333	0.862333	0.800333	0.916333	0.852	0.0166986
1 day, 18:45:09	0.932	0.912	0.963	0.952	0.892	1.006			0.841333	0.821333	0.872333	0.861333	0.801333	0.915333	0.852167	0.0164649
1 day, 18:50:09	0.932	0.913	0.963	0.951	0.892	1.008			0.841333	0.822333	0.872333	0.860333	0.801333	0.917333	0.8525	0.0166442
1 day, 18:55:09	0.932	0.914	0.963	0.95	0.892	1.009			0.841667	0.823667	0.872667	0.859667	0.801667	0.918667	0.853	0.0167006
1 day, 19:00:09	0.932	0.914	0.964	0.949	0.893	1.01			0.841333	0.823333	0.873333	0.858333	0.802333	0.919333	0.853	0.0167584
1 day, 19:05:09	0.932	0.914	0.964	0.949	0.892	1.01			0.841333	0.823333	0.873333	0.858333	0.801333	0.919333	0.852833	0.0168597
1 day, 19:10:09	0.934	0.915	0.964	0.951	0.892	1.009			0.843667	0.824667	0.873667	0.860667	0.801667	0.918667	0.853833	0.0166522
1 day, 19:15:09	0.934	0.916	0.965	0.952	0.891	1.009			0.843667	0.825667	0.874667	0.861667	0.800667	0.918667	0.854167	0.0167546
1 day, 19:20:09	0.934	0.916	0.964	0.952	0.891	1.009			0.843667	0.825667	0.873667	0.861667	0.800667	0.918667	0.854	0.0167146
1 day, 19:25:09	0.934	0.916	0.965	0.953	0.89	1.009			0.843333	0.825333	0.874333	0.862333	0.799333	0.918333	0.853833	0.0168775
1 day, 19:30:09	0.935	0.915	0.966	0.952	0.889	1.01			0.844667	0.824667	0.875667	0.861667	0.798667	0.919667	0.854167	0.0171751
1 day, 19:35:09	0.935	0.916	0.966	0.951	0.891	1.011			0.844667	0.825667	0.875667	0.860667	0.800667	0.920667	0.854667	0.0170196
1 day, 19:40:09	0.936	0.916	0.966	0.951	0.89	1.013			0.845667	0.825667	0.875667	0.860667	0.799667	0.922667	0.855	0.017366
1 day, 19:45:09	0.937	0.917	0.967	0.952	0.889	1.012			0.847	0.827	0.877	0.862	0.799	0.922	0.855667	0.0173237
1 day, 19:50:09	0.936	0.918	0.967	0.952	0.888	1.013			0.845333	0.827333	0.876333	0.861333	0.797333	0.922333	0.855	0.0175246
1 day, 19:55:09	0.937	0.92	0.968	0.953	0.886	1.013			0.846667	0.829667	0.877667	0.862667	0.795667	0.922667	0.855833	0.0176813
1 day, 20:00:09	0.937	0.918	0.968	0.954	0.887	1.014			0.846333	0.827333	0.877333	0.863333	0.796333	0.923333	0.855667	0.0178114
1 day, 20:05:09	0.938	0.92	0.969	0.954	0.888	1.014			0.847667	0.829667	0.878667	0.863667	0.797667	0.923667	0.856833	0.017619
1 day, 20:10:09	0.938	0.921	0.97	0.952	0.885	1.014			0.847333	0.830333	0.879333	0.861333	0.794333	0.923333	0.856	0.0179289
1 day, 20:15:09	0.938	0.921	0.97	0.954	0.888	1.016			0.847667	0.830667	0.879667	0.863667	0.797667	0.925667	0.8575	0.0178632
1 day, 20:20:09	0.938	0.922	0.971	0.953	0.887	1.016			0.847333	0.831333	0.880333	0.862333	0.796333	0.925333	0.857167	0.0179581
1 day, 20:25:09	0.938	0.923	0.972	0.954	0.886	1.017			0.847667	0.832667	0.881667	0.863667	0.795667	0.926667	0.858	0.0182038
1 day, 20:30:09	0.938	0.924	0.971	0.954	0.888	1.016			0.848	0.834	0.881	0.864	0.798	0.926	0.8585	0.0177609
1 day, 20:35:09	0.94	0.925	0.972	0.954	0.888	1.017			0.849667	0.834667	0.881667	0.863667	0.797667	0.926667	0.859	0.0178469
1 day, 20:40:09	0.942	0.924	0.973	0.954	0.888	1.018			0.851667	0.833667	0.882667	0.863667	0.797667	0.927667	0.8595	0.0180304
1 day, 20:45:09	0.943	0.924	0.974	0.953	0.888	1.019			0.852333	0.833333	0.883333	0.862333	0.797333	0.928333	0.8595	0.0181795
1 day, 20:50:09	0.942	0.927	0.974	0.953	0.888	1.019			0.851667	0.836667	0.883667	0.862667	0.797667	0.928667	0.860167	0.0180569
1 day, 20:55:09	0.94	0.925	0.974	0.953	0.888	1.019			0.85	0.835	0.884	0.863	0.798	0.929	0.859833	0.0181795
1 day, 21:00:09	0.941	0.925	0.974	0.954	0.888	1.021			0.851	0.835	0.884	0.864	0.798	0.931	0.8605	0.0184224
1 day, 21:05:09	0.943	0.926	0.975	0.953	0.888	1.021			0.852333	0.835333	0.884333	0.862333	0.797333	0.930333	0.860333	0.018383
1 day, 21:10:09	0.944	0.927	0.975	0.954	0.889	1.022			0.853333	0.836333	0.884333	0.863333	0.798333	0.931333	0.861167	0.0183402
1 day, 21:15:09	0.944	0.927	0.976	0.953	0.889	1.023			0.853667	0.836667	0.885667	0.862667	0.798667	0.932667	0.861667	0.0185077
1 day, 21:20:09	0.944	0.929	0.976	0.952	0.889	1.023			0.853667	0.838667	0.885667	0.861667	0.798667	0.932667	0.861833	0.0184199
1 day, 21:25:09	0.944	0.929	0.976	0.953	0.89	1.025			0.854	0.839	0.886	0.863	0.8	0.935	0.862833	0.0185642
1 day, 21:30:09	0.944	0.93	0.977	0.953	0.891	1.025			0.853667	0.839667	0.886667	0.862667	0.800667	0.934667	0.863	0.0184511
1 day, 21:35:09	0.945	0.931	0.977	0.953	0.89	1.026			0.855	0.841	0.887	0.863	0.8	0.936	0.863667	0.0186363
1 day, 21:40:09	0.946	0.933	0.978	0.953	0.891	1.027			0.855667	0.842667	0.887667	0.862667	0.800667	0.936667	0.864333	0.0185987
1 day, 21:45:09	0.947	0.935	0.979	0.955	0.891	1.027			0.857	0.845	0.889	0.865	0.801	0.937	0.865667	0.0185448
1 day, 21:50:09	0.948	0.935	0.98	0.955	0.893	1.027			0.857667	0.844667	0.889667	0.864667	0.802667	0.936667	0.866	0.0183406
1 day, 21:55:09	0.949	0.936	0.979	0.954	0.892	1.028			0.858667	0.845667	0.888667	0.863667	0.801667	0.937667	0.866	0.0184944
1 day, 22:00:09	0.948	0.936	0.98	0.955	0.892	1.029			0.857667	0.845667	0.889667	0.864667	0.801667	0.938667	0.866333	0.0186756
1 day, 22:05:09	0.949	0.937	0.98	0.955	0.894	1.03			0.859	0.847	0.89	0.865	0.804	0.94	0.8675	0.0185234
1 day, 22:10:09	0.95	0.937	0.98	0.957	0.893	1.031			0.859333	0.846333	0.889333	0.866333	0.802333	0.940333	0.867333	0.0187474
1 day, 22:15:09	0.951	0.938	0.981	0.96	0.893	1.032			0.860667	0.847667	0.890667	0.869667	0.802667	0.941667	0.868833	0.0188634
1 day, 22:20:09	0.95	0.938	0.982	0.958	0.894	1.031			0.86	0.848	0.892	0.868	0.804	0.941	0.868833	0.0186734
1 day, 22:25:09	0.951	0.94	0.982	0.958	0.893	1.032			0.860667	0.849667	0.891667	0.867667	0.802667	0.941667	0.869	0.018832
1 day, 22:30:09	0.952	0.94	0.983	0.959	0.895	1.032			0.862	0.85	0.893	0.869	0.805	0.942	0.870167	0.0186215
1 day, 22:35:09	0.953	0.941	0.984	0.958	0.893	1.033			0.863	0.851	0.894	0.868	0.803	0.943	0.870333	0.0189801
1 day, 22:40:09	0.953	0.942	0.984	0.957	0.894	1.035			0.863	0.852	0.894	0.867	0.804	0.945	0.870833	0.0190917
1 day, 22:45:09	0.953	0.942	0.985	0.958	0.895	1.035			0.862667	0.851667	0.894667	0.867667	0.804667	0.944667	0.871	0.0190099
1 day, 22:50:09	0.952	0.943	0.986	0.959	0.894	1.035			0.862	0.853	0.896	0.869	0.804	0.945	0.8715	0.0191464
1 day, 22:55:09	0.953	0.943	0.987	0.96	0.895	1.037			0.863	0.853	0.897	0.87	0.805	0.947	0.8725	0.0193076
1 day, 23:00:08	0.953	0.944	0.987	0.96	0.897	1.037			0.862333	0.853333	0.896333	0.869333	0.806333	0.946333	0.872333	0.0190421
1 day, 23:05:09	0.953	0.943	0.988	0.96	0.898	1.037			0.862667	0.852667	0.897667	0.869667	0.807667	0.946667	0.872833	0.0190042
1 day, 23:10:09	0.954	0.943	0.988	0.959	0.898	1.037			0.864	0.853	0.898	0.869	0.808	0.947	0.873167	0.0189937
1 day, 23:15:09	0.954	0.943	0.988	0.96	0.899	1.037			0.863667	0.852667	0.897667	0.869667	0.808667	0.946667	0.873167	0.0188728
1 day, 23:20:09	0.955	0.945	0.989	0.959	0.899	1.037			0.865	0.855	0.899	0.869	0.809	0.947	0.874	0.0188379
1 day, 23:25:09	0.956	0.945	0.99	0.96	0.899	1.037			0.865667	0.854667	0.899667	0.869667	0.808667	0.946667	0.874167	0.0188587
1 day, 23:30:09	0.957	0.945	0.991	0.961	0.9	1.039			0.867	0.855	0.901	0.871	0.81	0.949	0.8755	0.0190224
1 day, 23:35:09	0.958	0.945	0.991	0.961	0.901	1.04			0.867667	0.854667	0.900667	0.870667	0.810667	0.949667	0.875667	0.0190228
1 day, 23:40:09	0.959	0.945	0.992	0.961	0.901	1.041			0.868667	0.854667	0.901667	0.870667	0.810667	0.950667	0.876167	0.0191829
1 day, 23:45:09	0.959	0.946	0.993	0.961	0.9	1.04			0.868333	0.855333	0.902333	0.870333	0.809333	0.949333	0.875833	0.0191777
1 day, 23:50:09	0.96	0.947	0.993	0.961	0.901	1.041			0.869667	0.856667	0.902667	0.870667	0.810667	0.950667	0.876833	0.0191423
1 day, 23:55:09	0.96	0.948	0.995	0.961	0.901	1.041			0.869333	0.857333	0.904333	0.870333	0.810333	0.950333	0.877	0.0192001
2 days, 0:00:09	0.961	0.948	0.995	0.961	0.901	1.041			0.871	0.858	0.905	0.871	0.811	0.951	0.877833	0.0191875

## Sheet: SBW25-eWT
Time	A4	B9	C12	E3	F7	G10		raw data - medium control mean	A4	B9	C12	E3	F7	G10	mean	se
00:00:09	0.112	0.115	0.12	0.107	0.116	0.112			0.0113333	0.0143333	0.0193333	0.00633333	0.0153333	0.0113333	0.013	0.00180123
00:05:09	0.108	0.108	0.11	0.1	0.111	0.109			0.012	0.012	0.014	0.004	0.015	0.013	0.0116667	0.00160555
00:10:09	0.109	0.109	0.111	0.101	0.113	0.11			0.013	0.013	0.015	0.005	0.017	0.014	0.0128333	0.0016816
00:15:09	0.111	0.109	0.111	0.101	0.113	0.111			0.0153333	0.0133333	0.0153333	0.00533333	0.0173333	0.0153333	0.0136667	0.00174483
00:20:09	0.112	0.109	0.112	0.101	0.113	0.111			0.0163333	0.0133333	0.0163333	0.00533333	0.0173333	0.0153333	0.014	0.00181965
00:25:09	0.111	0.109	0.113	0.101	0.113	0.111			0.015	0.013	0.017	0.005	0.017	0.015	0.0136667	0.00183787
00:30:09	0.11	0.109	0.112	0.101	0.113	0.11			0.0143333	0.0133333	0.0163333	0.00533333	0.0173333	0.0143333	0.0135	0.00174005
00:35:09	0.109	0.109	0.112	0.101	0.113	0.11			0.0136667	0.0136667	0.0166667	0.00566667	0.0176667	0.0146667	0.0136667	0.00173205
00:40:09	0.108	0.108	0.111	0.101	0.112	0.11			0.0126667	0.0126667	0.0156667	0.00566667	0.0166667	0.0146667	0.013	0.00160555
00:45:09	0.108	0.108	0.11	0.101	0.112	0.11			0.0126667	0.0126667	0.0146667	0.00566667	0.0166667	0.0146667	0.0128333	0.00155813
00:50:09	0.108	0.108	0.11	0.101	0.111	0.109			0.0126667	0.0126667	0.0146667	0.00566667	0.0156667	0.0136667	0.0125	0.00144722												48h
00:55:09	0.107	0.107	0.11	0.101	0.111	0.109			0.0116667	0.0116667	0.0146667	0.00566667	0.0156667	0.0136667	0.0121667	0.00145488
01:00:09	0.107	0.107	0.11	0.101	0.111	0.109			0.0116667	0.0116667	0.0146667	0.00566667	0.0156667	0.0136667	0.0121667	0.00145488
01:05:09	0.107	0.107	0.109	0.101	0.111	0.109			0.0116667	0.0116667	0.0136667	0.00566667	0.0156667	0.0136667	0.012	0.00140633
01:10:09	0.107	0.107	0.11	0.101	0.111	0.109			0.0116667	0.0116667	0.0146667	0.00566667	0.0156667	0.0136667	0.0121667	0.00145488
01:15:09	0.108	0.107	0.11	0.101	0.111	0.109			0.0126667	0.0116667	0.0146667	0.00566667	0.0156667	0.0136667	0.0123333	0.00145297
01:20:09	0.108	0.107	0.109	0.102	0.111	0.11			0.0126667	0.0116667	0.0136667	0.00666667	0.0156667	0.0146667	0.0125	0.00130171
01:25:09	0.108	0.107	0.11	0.102	0.112	0.11			0.0126667	0.0116667	0.0146667	0.00666667	0.0166667	0.0146667	0.0128333	0.001424
01:30:09	0.109	0.108	0.11	0.103	0.112	0.11			0.0136667	0.0126667	0.0146667	0.00766667	0.0166667	0.0146667	0.0133333	0.0012561
01:35:09	0.109	0.108	0.111	0.103	0.112	0.11			0.0136667	0.0126667	0.0156667	0.00766667	0.0166667	0.0146667	0.0135	0.00130171
01:40:09	0.11	0.108	0.111	0.102	0.113	0.111			0.0146667	0.0126667	0.0156667	0.00666667	0.0176667	0.0156667	0.0138333	0.00157938
01:45:09	0.111	0.108	0.113	0.103	0.114	0.112			0.0156667	0.0126667	0.0176667	0.00766667	0.0186667	0.0166667	0.0148333	0.00166166
01:50:09	0.112	0.109	0.114	0.103	0.115	0.114			0.0166667	0.0136667	0.0186667	0.00766667	0.0196667	0.0186667	0.0158333	0.00185143
01:55:09	0.114	0.11	0.116	0.104	0.116	0.115			0.0186667	0.0146667	0.0206667	0.00866667	0.0206667	0.0196667	0.0171667	0.00192787
02:00:09	0.115	0.111	0.117	0.104	0.118	0.116			0.0196667	0.0156667	0.0216667	0.00866667	0.0226667	0.0206667	0.0181667	0.00214087
02:05:09	0.117	0.113	0.12	0.105	0.12	0.117			0.0216667	0.0176667	0.0246667	0.00966667	0.0246667	0.0216667	0.02	0.002319
02:10:09	0.12	0.113	0.122	0.106	0.123	0.118			0.025	0.018	0.027	0.011	0.028	0.023	0.022	0.00263312
02:15:09	0.124	0.116	0.124	0.108	0.127	0.12			0.0286667	0.0206667	0.0286667	0.0126667	0.0316667	0.0246667	0.0245	0.00283333
02:20:09	0.125	0.117	0.127	0.109	0.131	0.122			0.03	0.022	0.032	0.014	0.036	0.027	0.0268333	0.0032085
02:25:09	0.127	0.12	0.129	0.11	0.132	0.123			0.032	0.025	0.034	0.015	0.037	0.028	0.0285	0.00321196
02:30:09	0.129	0.122	0.131	0.111	0.132	0.125			0.034	0.027	0.036	0.016	0.037	0.03	0.03	0.00319374
02:35:09	0.129	0.126	0.131	0.112	0.131	0.126			0.034	0.031	0.036	0.017	0.036	0.031	0.0308333	0.00291452
02:40:09	0.129	0.129	0.133	0.114	0.131	0.126			0.034	0.034	0.038	0.019	0.036	0.031	0.032	0.00276887
02:45:09	0.129	0.131	0.135	0.116	0.131	0.128			0.034	0.036	0.04	0.021	0.036	0.033	0.0333333	0.00265414
02:50:09	0.131	0.131	0.137	0.117	0.134	0.13			0.036	0.036	0.042	0.022	0.039	0.035	0.035	0.00280476
02:55:09	0.132	0.129	0.14	0.116	0.135	0.132			0.037	0.034	0.045	0.021	0.04	0.037	0.0356667	0.0033032
03:00:09	0.134	0.13	0.142	0.117	0.137	0.136			0.039	0.035	0.047	0.022	0.042	0.041	0.0376667	0.00351821
03:05:09	0.136	0.132	0.146	0.118	0.138	0.138			0.041	0.037	0.051	0.023	0.043	0.043	0.0396667	0.00381809
03:10:09	0.138	0.134	0.148	0.12	0.141	0.14			0.043	0.039	0.053	0.025	0.046	0.045	0.0418333	0.00385069
03:15:09	0.14	0.137	0.149	0.123	0.141	0.142			0.045	0.042	0.054	0.028	0.046	0.047	0.0436667	0.00352767
03:20:09	0.143	0.139	0.152	0.125	0.144	0.144			0.048	0.044	0.057	0.03	0.049	0.049	0.0461667	0.00366439
03:25:09	0.145	0.141	0.154	0.127	0.144	0.146			0.05	0.046	0.059	0.032	0.049	0.051	0.0478333	0.00362782
03:30:09	0.148	0.143	0.156	0.129	0.147	0.148			0.053	0.048	0.061	0.034	0.052	0.053	0.0501667	0.00366439												12h
03:35:09	0.151	0.146	0.159	0.131	0.149	0.15			0.056	0.051	0.064	0.036	0.054	0.055	0.0526667	0.00377418
03:40:09	0.155	0.148	0.161	0.132	0.153	0.152			0.06	0.053	0.066	0.037	0.058	0.057	0.0551667	0.00402837
03:45:09	0.158	0.15	0.164	0.133	0.154	0.154			0.063	0.055	0.069	0.038	0.059	0.059	0.0571667	0.00429276
03:50:09	0.162	0.154	0.169	0.135	0.16	0.157			0.067	0.059	0.074	0.04	0.065	0.062	0.0611667	0.00471463
03:55:09	0.167	0.156	0.17	0.137	0.164	0.159			0.072	0.061	0.075	0.042	0.069	0.064	0.0638333	0.00484022
04:00:09	0.17	0.158	0.174	0.138	0.167	0.162			0.075	0.063	0.079	0.043	0.072	0.067	0.0665	0.00523927
04:05:09	0.173	0.162	0.185	0.141	0.173	0.164			0.078	0.067	0.09	0.046	0.078	0.069	0.0713333	0.00606447
04:10:09	0.175	0.166	0.189	0.143	0.175	0.17			0.08	0.071	0.094	0.048	0.08	0.075	0.0746667	0.00620573
04:15:09	0.178	0.167	0.194	0.145	0.178	0.171			0.083	0.072	0.099	0.05	0.083	0.076	0.0771667	0.00661018
04:20:09	0.182	0.171	0.202	0.148	0.181	0.179			0.087	0.076	0.107	0.053	0.086	0.084	0.0821667	0.00718061
04:25:09	0.188	0.181	0.204	0.15	0.187	0.18			0.093	0.086	0.109	0.055	0.092	0.085	0.0866667	0.00724185
04:30:09	0.194	0.188	0.206	0.154	0.194	0.183			0.099	0.093	0.111	0.059	0.099	0.088	0.0915	0.00721919
04:35:09	0.196	0.191	0.211	0.156	0.199	0.185			0.101	0.096	0.116	0.061	0.104	0.09	0.0946667	0.00761431
04:40:09	0.2	0.195	0.217	0.159	0.202	0.189			0.105333	0.100333	0.122333	0.0643333	0.107333	0.0943333	0.099	0.00791482
04:45:09	0.203	0.201	0.224	0.161	0.207	0.194			0.108333	0.106333	0.129333	0.0663333	0.112333	0.0993333	0.103667	0.00851535
04:50:09	0.206	0.202	0.23	0.164	0.211	0.197			0.111333	0.107333	0.135333	0.0693333	0.116333	0.102333	0.107	0.00884936
04:55:09	0.214	0.203	0.236	0.167	0.216	0.201			0.119333	0.108333	0.141333	0.0723333	0.121333	0.106333	0.1115	0.00934315
05:00:09	0.22	0.21	0.241	0.17	0.221	0.207			0.125333	0.115333	0.146333	0.0753333	0.126333	0.112333	0.116833	0.00962202
05:05:09	0.225	0.216	0.25	0.174	0.227	0.213			0.130333	0.121333	0.155333	0.0793333	0.132333	0.118333	0.122833	0.010194
05:10:09	0.229	0.223	0.258	0.178	0.231	0.218			0.134333	0.128333	0.163333	0.0833333	0.136333	0.123333	0.128167	0.0106063
05:15:09	0.236	0.228	0.264	0.183	0.236	0.223			0.141333	0.133333	0.169333	0.0883333	0.141333	0.128333	0.133667	0.01076
05:20:09	0.242	0.234	0.27	0.188	0.242	0.229			0.147333	0.139333	0.175333	0.0933333	0.147333	0.134333	0.1395	0.0109008
05:25:09	0.247	0.24	0.278	0.193	0.248	0.235			0.152333	0.145333	0.183333	0.0983333	0.153333	0.140333	0.1455	0.011241
05:30:09	0.255	0.247	0.288	0.2	0.255	0.242			0.160333	0.152333	0.193333	0.105333	0.160333	0.147333	0.153167	0.0116029
05:35:09	0.267	0.255	0.326	0.205	0.262	0.25			0.172333	0.160333	0.231333	0.110333	0.167333	0.155333	0.166167	0.0158691
05:40:09	0.278	0.261	0.387	0.21	0.268	0.257			0.183333	0.166333	0.292333	0.115333	0.173333	0.162333	0.182167	0.0240325
05:45:08	0.294	0.266	0.389	0.215	0.279	0.263			0.199333	0.171333	0.294333	0.120333	0.184333	0.168333	0.189667	0.0235764
05:50:09	0.309	0.271	0.392	0.22	0.296	0.27			0.214333	0.176333	0.297333	0.125333	0.201333	0.175333	0.198333	0.0233866
05:55:09	0.35	0.279	0.422	0.224	0.318	0.281			0.255333	0.184333	0.327333	0.129333	0.223333	0.186333	0.217667	0.0279126
06:00:09	0.451	0.291	0.424	0.229	0.403	0.296			0.356667	0.196667	0.329667	0.134667	0.308667	0.201667	0.254667	0.0362942
06:05:09	0.464	0.308	0.461	0.234	0.445	0.328			0.369667	0.213667	0.366667	0.139667	0.350667	0.233667	0.279	0.0394881
06:10:09	0.437	0.365	0.462	0.241	0.44	0.389			0.342333	0.270333	0.367333	0.146333	0.345333	0.294333	0.294333	0.0330222
06:15:09	0.47	0.427	0.462	0.25	0.439	0.395			0.375667	0.332667	0.367667	0.155667	0.344667	0.300667	0.312833	0.033272
06:20:09	0.457	0.423	0.47	0.26	0.467	0.396			0.362667	0.328667	0.375667	0.165667	0.372667	0.301667	0.317833	0.0326062
06:25:09	0.459	0.453	0.476	0.275	0.474	0.417			0.364333	0.358333	0.381333	0.180333	0.379333	0.322333	0.331	0.0313599
06:30:09	0.474	0.467	0.48	0.294	0.47	0.445			0.379667	0.372667	0.385667	0.199667	0.375667	0.350667	0.344	0.0292742
06:35:09	0.47	0.46	0.481	0.318	0.48	0.45			0.375667	0.365667	0.386667	0.223667	0.385667	0.355667	0.348833	0.0254983
06:40:09	0.474	0.472	0.485	0.375	0.485	0.461			0.379667	0.377667	0.390667	0.280667	0.390667	0.366667	0.364333	0.0171322
06:45:09	0.475	0.476	0.486	0.435	0.492	0.464			0.380667	0.381667	0.391667	0.340667	0.397667	0.369667	0.377	0.00826909
06:50:08	0.472	0.485	0.489	0.45	0.494	0.473			0.377667	0.390667	0.394667	0.355667	0.399667	0.378667	0.382833	0.00649829
06:55:09	0.474	0.487	0.49	0.475	0.491	0.473			0.379667	0.392667	0.395667	0.380667	0.396667	0.378667	0.387333	0.0034801
07:00:09	0.478	0.49	0.492	0.44	0.494	0.478			0.383667	0.395667	0.397667	0.345667	0.399667	0.383667	0.384333	0.00824082
07:05:09	0.48	0.496	0.493	0.457	0.495	0.478			0.386	0.402	0.399	0.363	0.401	0.384	0.389167	0.00611782
07:10:09	0.481	0.492	0.496	0.457	0.497	0.482			0.386667	0.397667	0.401667	0.362667	0.402667	0.387667	0.389833	0.00610692
07:15:09	0.48	0.492	0.496	0.465	0.496	0.484			0.385667	0.397667	0.401667	0.370667	0.401667	0.389667	0.391167	0.00488365
07:20:09	0.479	0.49	0.496	0.474	0.496	0.484			0.385	0.396	0.402	0.38	0.402	0.39	0.3925	0.0037036
07:25:09	0.481	0.49	0.494	0.482	0.496	0.486			0.387	0.396	0.4	0.388	0.402	0.392	0.394167	0.00253531
07:30:09	0.48	0.488	0.495	0.484	0.496	0.486			0.386	0.394	0.401	0.39	0.402	0.392	0.394167	0.00256147
07:35:09	0.482	0.49	0.496	0.485	0.495	0.487			0.387667	0.395667	0.401667	0.390667	0.400667	0.392667	0.394833	0.00227181
07:40:09	0.481	0.487	0.494	0.493	0.493	0.487			0.387	0.393	0.4	0.399	0.399	0.393	0.395167	0.0020723
07:45:09	0.48	0.485	0.495	0.49	0.492	0.487			0.386	0.391	0.401	0.396	0.398	0.393	0.394167	0.002182
07:50:09	0.481	0.488	0.498	0.49	0.49	0.489			0.387	0.394	0.404	0.396	0.396	0.395	0.395333	0.0022161
07:55:09	0.482	0.487	0.499	0.495	0.489	0.488			0.388	0.393	0.405	0.401	0.395	0.394	0.396	0.00247656
08:00:09	0.483	0.487	0.501	0.496	0.488	0.489			0.389	0.393	0.407	0.402	0.394	0.395	0.396667	0.00269155
08:05:09	0.484	0.486	0.501	0.496	0.489	0.489			0.39	0.392	0.407	0.402	0.395	0.395	0.396833	0.00262573
08:10:09	0.485	0.486	0.5	0.499	0.489	0.49			0.391	0.392	0.406	0.405	0.395	0.396	0.3975	0.0026426
08:15:09	0.486	0.487	0.501	0.501	0.488	0.489			0.392	0.393	0.407	0.407	0.394	0.395	0.398	0.00287518
08:20:09	0.487	0.488	0.502	0.5	0.488	0.489			0.393	0.394	0.408	0.406	0.394	0.395	0.398333	0.00276486
08:25:09	0.486	0.489	0.504	0.502	0.49	0.49			0.392	0.395	0.41	0.408	0.396	0.396	0.3995	0.00307409
08:30:09	0.486	0.49	0.506	0.502	0.489	0.491			0.392	0.396	0.412	0.408	0.395	0.397	0.4	0.00327618
08:35:09	0.489	0.492	0.508	0.503	0.49	0.492			0.395	0.398	0.414	0.409	0.396	0.398	0.401667	0.00321109
08:40:09	0.487	0.492	0.509	0.503	0.488	0.491			0.393	0.398	0.415	0.409	0.394	0.397	0.401	0.00364234
08:45:09	0.488	0.492	0.509	0.503	0.486	0.492			0.394	0.398	0.415	0.409	0.392	0.398	0.401	0.00368782
08:50:09	0.489	0.494	0.512	0.504	0.484	0.493			0.395	0.4	0.418	0.41	0.39	0.399	0.402	0.00418728
08:55:09	0.492	0.494	0.514	0.503	0.486	0.494			0.398	0.4	0.42	0.409	0.392	0.4	0.403167	0.00403664
09:00:09	0.491	0.494	0.515	0.503	0.489	0.495			0.397	0.4	0.421	0.409	0.395	0.401	0.403833	0.0039532
09:05:09	0.492	0.497	0.516	0.502	0.489	0.496			0.398	0.403	0.422	0.408	0.395	0.402	0.404667	0.00391294
09:10:09	0.494	0.499	0.518	0.502	0.488	0.498			0.4	0.405	0.424	0.408	0.394	0.404	0.405833	0.00413454
09:15:09	0.495	0.5	0.521	0.5	0.49	0.5			0.401	0.406	0.427	0.406	0.396	0.406	0.407	0.00432049
09:20:09	0.497	0.502	0.521	0.499	0.492	0.501			0.403	0.408	0.427	0.405	0.398	0.407	0.408	0.00406612
09:25:09	0.498	0.502	0.522	0.498	0.494	0.503			0.404	0.408	0.428	0.404	0.4	0.409	0.408833	0.00405312
09:30:09	0.499	0.504	0.524	0.498	0.497	0.504			0.405	0.41	0.43	0.404	0.403	0.41	0.410333	0.00412041
09:35:09	0.502	0.504	0.527	0.498	0.498	0.506			0.408	0.41	0.433	0.404	0.404	0.412	0.411833	0.00443032
09:40:09	0.504	0.506	0.528	0.498	0.499	0.507			0.41	0.412	0.434	0.404	0.405	0.413	0.413	0.0044572
09:45:09	0.505	0.508	0.53	0.499	0.5	0.51			0.411	0.414	0.436	0.405	0.406	0.416	0.414667	0.0046164
09:50:09	0.507	0.508	0.531	0.5	0.502	0.511			0.413	0.414	0.437	0.406	0.408	0.417	0.415833	0.00454178
09:55:09	0.509	0.511	0.533	0.5	0.504	0.512			0.415	0.417	0.439	0.406	0.41	0.418	0.4175	0.00468152
10:00:09	0.511	0.511	0.534	0.5	0.506	0.514			0.417	0.417	0.44	0.406	0.412	0.42	0.418667	0.0047164
10:05:09	0.512	0.514	0.535	0.501	0.506	0.516			0.418	0.42	0.441	0.407	0.412	0.422	0.42	0.00476795
10:10:09	0.514	0.514	0.536	0.501	0.507	0.517			0.42	0.42	0.442	0.407	0.413	0.423	0.420833	0.00485398
10:15:09	0.516	0.516	0.538	0.501	0.509	0.52			0.422	0.422	0.444	0.407	0.415	0.426	0.422667	0.00507061
10:20:09	0.517	0.517	0.539	0.503	0.511	0.522			0.423	0.423	0.445	0.409	0.417	0.428	0.424167	0.00494245
10:25:09	0.519	0.519	0.541	0.504	0.512	0.524			0.425	0.425	0.447	0.41	0.418	0.43	0.425833	0.0050952
10:30:09	0.521	0.521	0.542	0.505	0.514	0.525			0.427	0.427	0.448	0.411	0.42	0.431	0.427333	0.00503764
10:35:09	0.523	0.521	0.544	0.505	0.515	0.527			0.429333	0.427333	0.450333	0.411333	0.421333	0.433333	0.428833	0.00531507
10:40:09	0.524	0.523	0.545	0.507	0.517	0.529			0.43	0.429	0.451	0.413	0.423	0.435	0.430167	0.00517955
10:45:09	0.525	0.524	0.546	0.508	0.519	0.53			0.431	0.43	0.452	0.414	0.425	0.436	0.431333	0.00513593
10:50:09	0.527	0.526	0.547	0.509	0.52	0.531			0.433	0.432	0.453	0.415	0.426	0.437	0.432667	0.00512944
10:55:09	0.529	0.527	0.549	0.511	0.522	0.532			0.435	0.433	0.455	0.417	0.428	0.438	0.434333	0.0051099
11:00:09	0.531	0.529	0.551	0.512	0.523	0.534			0.437333	0.435333	0.457333	0.418333	0.429333	0.440333	0.436333	0.00526624
11:05:09	0.533	0.529	0.552	0.513	0.524	0.536			0.439	0.435	0.458	0.419	0.43	0.442	0.437167	0.00531298
11:10:09	0.534	0.532	0.553	0.514	0.526	0.537			0.440333	0.438333	0.459333	0.420333	0.432333	0.443333	0.439	0.00525145
11:15:09	0.535	0.533	0.554	0.515	0.527	0.539			0.441	0.439	0.46	0.421	0.433	0.445	0.439833	0.00528152
11:20:09	0.536	0.534	0.556	0.517	0.528	0.541			0.442	0.44	0.462	0.423	0.434	0.447	0.441333	0.00532708
11:25:09	0.537	0.535	0.559	0.518	0.529	0.542			0.443333	0.441333	0.465333	0.424333	0.435333	0.448333	0.443	0.00558967
11:30:09	0.538	0.536	0.561	0.521	0.531	0.544			0.444667	0.442667	0.467667	0.427667	0.437667	0.450667	0.445167	0.00549394
11:35:09	0.539	0.537	0.563	0.523	0.532	0.544			0.445	0.443	0.469	0.429	0.438	0.45	0.445667	0.00549949
11:40:09	0.542	0.538	0.565	0.524	0.533	0.545			0.448333	0.444333	0.471333	0.430333	0.439333	0.451333	0.4475	0.00564161
11:45:09	0.542	0.538	0.567	0.526	0.535	0.547			0.448333	0.444333	0.473333	0.432333	0.441333	0.453333	0.448833	0.00568477
11:50:09	0.543	0.54	0.569	0.527	0.537	0.549			0.449333	0.446333	0.475333	0.433333	0.443333	0.455333	0.4505	0.00578744
11:55:09	0.544	0.541	0.572	0.529	0.538	0.551			0.45	0.447	0.478	0.435	0.444	0.457	0.451833	0.00600787
12:00:09	0.547	0.542	0.573	0.53	0.54	0.553			0.453333	0.448333	0.479333	0.436333	0.446333	0.459333	0.453833	0.00598192
12:05:09	0.549	0.544	0.576	0.532	0.543	0.557			0.455333	0.450333	0.482333	0.438333	0.449333	0.463333	0.4565	0.00615043
12:10:09	0.551	0.546	0.579	0.533	0.545	0.559			0.457667	0.452667	0.485667	0.439667	0.451667	0.465667	0.458833	0.00638966
12:15:09	0.553	0.547	0.581	0.535	0.547	0.561			0.459333	0.453333	0.487333	0.441333	0.453333	0.467333	0.460333	0.00642391
12:20:08	0.554	0.549	0.584	0.537	0.549	0.562			0.460667	0.455667	0.490667	0.443667	0.455667	0.468667	0.4625	0.0065392
12:25:09	0.556	0.552	0.588	0.539	0.55	0.562			0.462333	0.458333	0.494333	0.445333	0.456333	0.468333	0.464167	0.00678438
12:30:09	0.556	0.553	0.59	0.54	0.552	0.564			0.462667	0.459667	0.496667	0.446667	0.458667	0.470667	0.465833	0.00693021
12:35:09	0.558	0.554	0.592	0.541	0.553	0.565			0.464667	0.460667	0.498667	0.447667	0.459667	0.471667	0.467167	0.00706517
12:40:09	0.559	0.555	0.593	0.543	0.555	0.567			0.465667	0.461667	0.499667	0.449667	0.461667	0.473667	0.468667	0.0069618
12:45:09	0.56	0.557	0.596	0.545	0.556	0.569			0.466667	0.463667	0.502667	0.451667	0.462667	0.475667	0.4705	0.00716201
12:50:09	0.562	0.56	0.598	0.548	0.559	0.573			0.468667	0.466667	0.504667	0.454667	0.465667	0.479667	0.473333	0.00706006
12:55:09	0.564	0.561	0.599	0.55	0.561	0.576			0.470667	0.467667	0.505667	0.456667	0.467667	0.482667	0.475167	0.00697973
13:00:09	0.566	0.564	0.602	0.553	0.562	0.579			0.472333	0.470333	0.508333	0.459333	0.468333	0.485333	0.477333	0.00708049
13:05:09	0.567	0.564	0.603	0.555	0.565	0.58			0.473667	0.470667	0.509667	0.461667	0.471667	0.486667	0.479	0.00695541
13:10:09	0.569	0.567	0.605	0.556	0.566	0.582			0.475667	0.473667	0.511667	0.462667	0.472667	0.488667	0.480833	0.00703997
13:15:09	0.57	0.569	0.609	0.558	0.568	0.583			0.476667	0.475667	0.515667	0.464667	0.474667	0.489667	0.482833	0.00732765
13:20:09	0.572	0.568	0.608	0.561	0.57	0.583			0.478667	0.474667	0.514667	0.467667	0.476667	0.489667	0.483667	0.00685079
13:25:09	0.574	0.571	0.611	0.564	0.572	0.586			0.480667	0.477667	0.517667	0.470667	0.478667	0.492667	0.486333	0.00691215
13:30:09	0.575	0.573	0.611	0.567	0.573	0.587			0.482	0.48	0.518	0.474	0.48	0.494	0.488	0.00657267
13:35:09	0.576	0.575	0.613	0.57	0.575	0.589			0.482667	0.481667	0.519667	0.476667	0.481667	0.495667	0.489667	0.00653707
13:40:09	0.578	0.577	0.615	0.574	0.577	0.591			0.485	0.484	0.522	0.481	0.484	0.498	0.492333	0.00641179
13:45:09	0.58	0.577	0.615	0.576	0.579	0.592			0.486667	0.483667	0.521667	0.482667	0.485667	0.498667	0.493167	0.00616847
13:50:09	0.581	0.578	0.616	0.578	0.58	0.594			0.487667	0.484667	0.522667	0.484667	0.486667	0.500667	0.4945	0.00614501
13:55:09	0.583	0.581	0.619	0.582	0.581	0.596			0.489667	0.487667	0.525667	0.488667	0.487667	0.502667	0.497	0.00619498
14:00:09	0.583	0.582	0.62	0.583	0.583	0.595			0.490333	0.489333	0.527333	0.490333	0.490333	0.502333	0.498333	0.00613732
14:05:09	0.585	0.584	0.621	0.586	0.585	0.598			0.492333	0.491333	0.528333	0.493333	0.492333	0.505333	0.5005	0.00596331
14:10:09	0.587	0.585	0.623	0.588	0.586	0.598			0.493667	0.491667	0.529667	0.494667	0.492667	0.504667	0.501167	0.00601526
14:15:09	0.588	0.586	0.625	0.59	0.587	0.601			0.495	0.493	0.532	0.497	0.494	0.508	0.503167	0.00618286
14:20:09	0.589	0.588	0.626	0.592	0.589	0.603			0.496333	0.495333	0.533333	0.499333	0.496333	0.510333	0.505167	0.00607408
14:25:09	0.591	0.59	0.629	0.595	0.59	0.604			0.498	0.497	0.536	0.502	0.497	0.511	0.506833	0.00622584
14:30:09	0.591	0.591	0.63	0.596	0.592	0.606			0.498333	0.498333	0.537333	0.503333	0.499333	0.513333	0.508333	0.00625033
14:35:09	0.593	0.594	0.631	0.599	0.593	0.608			0.500333	0.501333	0.538333	0.506333	0.500333	0.515333	0.510333	0.00607179
14:40:09	0.593	0.595	0.631	0.6	0.596	0.608			0.500333	0.502333	0.538333	0.507333	0.503333	0.515333	0.511167	0.00585045
14:45:09	0.595	0.596	0.632	0.601	0.596	0.61			0.502333	0.503333	0.539333	0.508333	0.503333	0.517333	0.512333	0.00586515
14:50:09	0.597	0.599	0.635	0.605	0.598	0.611			0.504333	0.506333	0.542333	0.512333	0.505333	0.518333	0.514833	0.00590903
14:55:09	0.599	0.599	0.636	0.605	0.598	0.613			0.506333	0.506333	0.543333	0.512333	0.505333	0.520333	0.515667	0.00599815
15:00:09	0.6	0.601	0.637	0.607	0.601	0.615			0.507333	0.508333	0.544333	0.514333	0.508333	0.522333	0.5175	0.00584475
15:05:09	0.602	0.603	0.639	0.608	0.603	0.616			0.509333	0.510333	0.546333	0.515333	0.510333	0.523333	0.519167	0.00583904
15:10:09	0.603	0.605	0.64	0.61	0.604	0.618			0.510333	0.512333	0.547333	0.517333	0.511333	0.525333	0.520667	0.00579463
15:15:09	0.604	0.606	0.642	0.612	0.606	0.619			0.511333	0.513333	0.549333	0.519333	0.513333	0.526333	0.522167	0.00587887
15:20:08	0.607	0.609	0.643	0.614	0.608	0.621			0.514333	0.516333	0.550333	0.521333	0.515333	0.528333	0.524333	0.00561545
15:25:09	0.608	0.609	0.644	0.615	0.609	0.623			0.515333	0.516333	0.551333	0.522333	0.516333	0.530333	0.525333	0.0056921
15:30:09	0.61	0.611	0.646	0.617	0.609	0.625			0.517333	0.518333	0.553333	0.524333	0.516333	0.532333	0.527	0.00580613
15:35:09	0.609	0.612	0.647	0.619	0.611	0.625			0.516333	0.519333	0.554333	0.526333	0.518333	0.532333	0.527833	0.00582952
15:40:09	0.612	0.614	0.649	0.622	0.613	0.627			0.519333	0.521333	0.556333	0.529333	0.520333	0.534333	0.530167	0.00575857
15:45:09	0.613	0.615	0.651	0.623	0.614	0.628			0.520333	0.522333	0.558333	0.530333	0.521333	0.535333	0.531333	0.00591044
15:50:09	0.616	0.617	0.651	0.624	0.616	0.63			0.523333	0.524333	0.558333	0.531333	0.523333	0.537333	0.533	0.00555378
15:55:09	0.617	0.618	0.654	0.625	0.617	0.631			0.524333	0.525333	0.561333	0.532333	0.524333	0.538333	0.534333	0.00585947
16:00:09	0.618	0.62	0.656	0.627	0.619	0.632			0.525333	0.527333	0.563333	0.534333	0.526333	0.539333	0.536	0.00589727
16:05:09	0.619	0.622	0.658	0.629	0.62	0.634			0.526333	0.529333	0.565333	0.536333	0.527333	0.541333	0.537667	0.0060148
16:10:09	0.62	0.623	0.658	0.631	0.621	0.635			0.527333	0.530333	0.565333	0.538333	0.528333	0.542333	0.538667	0.00585757
16:15:09	0.622	0.624	0.659	0.631	0.621	0.636			0.529333	0.531333	0.566333	0.538333	0.528333	0.543333	0.5395	0.00586184
16:20:09	0.624	0.626	0.661	0.631	0.622	0.638			0.531333	0.533333	0.568333	0.538333	0.529333	0.545333	0.541	0.00594792
16:25:09	0.623	0.627	0.662	0.633	0.625	0.638			0.530333	0.534333	0.569333	0.540333	0.532333	0.545333	0.542	0.0059142
16:30:09	0.625	0.627	0.662	0.634	0.626	0.639			0.532333	0.534333	0.569333	0.541333	0.533333	0.546333	0.542833	0.00574311
16:35:09	0.628	0.629	0.665	0.636	0.626	0.641			0.535333	0.536333	0.572333	0.543333	0.533333	0.548333	0.544833	0.00595959
16:40:09	0.629	0.63	0.666	0.638	0.629	0.643			0.536333	0.537333	0.573333	0.545333	0.536333	0.550333	0.5465	0.00585045
16:45:09	0.629	0.632	0.668	0.641	0.63	0.643			0.536333	0.539333	0.575333	0.548333	0.537333	0.550333	0.547833	0.00599305
16:50:09	0.631	0.632	0.669	0.643	0.631	0.646			0.538333	0.539333	0.576333	0.550333	0.538333	0.553333	0.549333	0.00602218
16:55:09	0.633	0.635	0.671	0.643	0.632	0.647			0.540333	0.542333	0.578333	0.550333	0.539333	0.554333	0.550833	0.00600971
17:00:09	0.632	0.635	0.672	0.644	0.633	0.648			0.539333	0.542333	0.579333	0.551333	0.540333	0.555333	0.551333	0.00618061
17:05:09	0.633	0.637	0.673	0.646	0.635	0.649			0.540333	0.544333	0.580333	0.553333	0.542333	0.556333	0.552833	0.00607591
17:10:09	0.634	0.638	0.674	0.649	0.636	0.65			0.541333	0.545333	0.581333	0.556333	0.543333	0.557333	0.554167	0.00609052
17:15:09	0.638	0.64	0.676	0.649	0.637	0.653			0.545333	0.547333	0.583333	0.556333	0.544333	0.560333	0.556167	0.00603002
17:20:09	0.638	0.64	0.677	0.649	0.639	0.654			0.545333	0.547333	0.584333	0.556333	0.546333	0.561333	0.556833	0.00608139
17:25:09	0.639	0.641	0.679	0.651	0.64	0.656			0.546333	0.548333	0.586333	0.558333	0.547333	0.563333	0.558333	0.00625566
17:30:09	0.641	0.642	0.68	0.653	0.642	0.656			0.548333	0.549333	0.587333	0.560333	0.549333	0.563333	0.559667	0.00611374
17:35:09	0.64	0.64	0.68	0.654	0.642	0.657			0.547333	0.547333	0.587333	0.561333	0.549333	0.564333	0.5595	0.00632675
17:40:09	0.643	0.646	0.683	0.657	0.644	0.658			0.550333	0.553333	0.590333	0.564333	0.551333	0.565333	0.5625	0.00617207
17:45:09	0.645	0.645	0.683	0.657	0.645	0.659			0.552333	0.552333	0.590333	0.564333	0.552333	0.566333	0.563	0.00605897
17:50:09	0.645	0.647	0.685	0.658	0.646	0.662			0.552333	0.554333	0.592333	0.565333	0.553333	0.569333	0.5645	0.00625788
17:55:09	0.647	0.648	0.685	0.659	0.646	0.662			0.554333	0.555333	0.592333	0.566333	0.553333	0.569333	0.565167	0.00608505
18:00:09	0.648	0.649	0.686	0.661	0.647	0.663			0.555333	0.556333	0.593333	0.568333	0.554333	0.570333	0.566333	0.00609371
18:05:09	0.649	0.651	0.688	0.663	0.649	0.664			0.556333	0.558333	0.595333	0.570333	0.556333	0.571333	0.568	0.00613551
18:10:09	0.651	0.651	0.688	0.664	0.65	0.667			0.558333	0.558333	0.595333	0.571333	0.557333	0.574333	0.569167	0.00603002
18:15:09	0.653	0.653	0.69	0.665	0.651	0.667			0.560333	0.560333	0.597333	0.572333	0.558333	0.574333	0.5705	0.00603554
18:20:09	0.652	0.653	0.691	0.666	0.653	0.668			0.559333	0.560333	0.598333	0.573333	0.560333	0.575333	0.571167	0.00615043
18:25:09	0.654	0.655	0.694	0.668	0.653	0.668			0.561333	0.562333	0.601333	0.575333	0.560333	0.575333	0.572667	0.00638575
18:30:09	0.655	0.655	0.694	0.669	0.655	0.671			0.562333	0.562333	0.601333	0.576333	0.562333	0.578333	0.573833	0.0062703
18:35:09	0.655	0.656	0.695	0.67	0.656	0.672			0.562333	0.563333	0.602333	0.577333	0.563333	0.579333	0.574667	0.00633333
18:40:09	0.657	0.657	0.696	0.673	0.656	0.673			0.564333	0.564333	0.603333	0.580333	0.563333	0.580333	0.576	0.00637007
18:45:09	0.658	0.659	0.698	0.674	0.657	0.673			0.565333	0.566333	0.605333	0.581333	0.564333	0.580333	0.577167	0.00643644
18:50:09	0.66	0.66	0.7	0.675	0.657	0.676			0.567333	0.567333	0.607333	0.582333	0.564333	0.583333	0.578667	0.00663157
18:55:09	0.661	0.661	0.701	0.677	0.659	0.677			0.568333	0.568333	0.608333	0.584333	0.566333	0.584333	0.58	0.00658112
19:00:09	0.661	0.662	0.701	0.679	0.66	0.679			0.568333	0.569333	0.608333	0.586333	0.567333	0.586333	0.581	0.00655066
19:05:09	0.662	0.662	0.702	0.68	0.661	0.68			0.569333	0.569333	0.609333	0.587333	0.568333	0.587333	0.581833	0.00661186
19:10:09	0.664	0.664	0.703	0.681	0.662	0.68			0.571333	0.571333	0.610333	0.588333	0.569333	0.587333	0.583	0.00646357
19:15:09	0.665	0.665	0.706	0.681	0.663	0.682			0.572333	0.572333	0.613333	0.588333	0.570333	0.589333	0.584333	0.00674784
19:20:09	0.666	0.666	0.707	0.682	0.663	0.684			0.573333	0.573333	0.614333	0.589333	0.570333	0.591333	0.585333	0.00684592
19:25:09	0.667	0.667	0.708	0.683	0.663	0.684			0.574333	0.574333	0.615333	0.590333	0.570333	0.591333	0.586	0.00689283
19:30:09	0.67	0.668	0.709	0.685	0.664	0.685			0.577333	0.575333	0.616333	0.592333	0.571333	0.592333	0.5875	0.0068089
19:35:09	0.67	0.669	0.71	0.686	0.665	0.686			0.577333	0.576333	0.617333	0.593333	0.572333	0.593333	0.588333	0.00686052
19:40:09	0.669	0.67	0.711	0.687	0.667	0.688			0.576667	0.577667	0.618667	0.594667	0.574667	0.595667	0.589667	0.0069282
19:45:09	0.671	0.671	0.712	0.688	0.668	0.689			0.578333	0.578333	0.619333	0.595333	0.575333	0.596333	0.5905	0.00686739
19:50:09	0.671	0.672	0.713	0.688	0.669	0.69			0.578667	0.579667	0.620667	0.595667	0.576667	0.597667	0.5915	0.00690612
19:55:09	0.672	0.673	0.714	0.689	0.67	0.692			0.579667	0.580667	0.621667	0.596667	0.577667	0.599667	0.592667	0.00693782
20:00:09	0.674	0.674	0.714	0.689	0.671	0.692			0.581667	0.581667	0.621667	0.596667	0.578667	0.599667	0.593333	0.00668664
20:05:09	0.676	0.675	0.716	0.691	0.672	0.694			0.583667	0.582667	0.623667	0.598667	0.579667	0.601667	0.595	0.00681991
20:10:09	0.678	0.676	0.717	0.691	0.672	0.695			0.585667	0.583667	0.624667	0.598667	0.579667	0.602667	0.595833	0.00682845
20:15:09	0.677	0.676	0.718	0.692	0.673	0.696			0.584667	0.583667	0.625667	0.599667	0.580667	0.603667	0.596333	0.00699365
20:20:09	0.68	0.678	0.721	0.693	0.674	0.697			0.588	0.586	0.629	0.601	0.582	0.605	0.5985	0.0071122
20:25:09	0.681	0.678	0.721	0.693	0.674	0.697			0.589	0.586	0.629	0.601	0.582	0.605	0.598667	0.00706478
20:30:09	0.682	0.68	0.722	0.694	0.675	0.698			0.59	0.588	0.63	0.602	0.583	0.606	0.599833	0.00700674
20:35:09	0.684	0.681	0.724	0.695	0.677	0.701			0.592	0.589	0.632	0.603	0.585	0.609	0.601667	0.00708833
20:40:09	0.685	0.682	0.725	0.697	0.677	0.702			0.593	0.59	0.633	0.605	0.585	0.61	0.602667	0.00717712
20:45:09	0.684	0.683	0.727	0.698	0.677	0.703			0.592	0.591	0.635	0.606	0.585	0.611	0.603333	0.00749518
20:50:09	0.686	0.684	0.728	0.699	0.678	0.705			0.594	0.592	0.636	0.607	0.586	0.613	0.604667	0.00748183
20:55:09	0.686	0.685	0.73	0.702	0.679	0.706			0.594	0.593	0.638	0.61	0.587	0.614	0.606	0.00769848
21:00:09	0.687	0.685	0.732	0.704	0.682	0.708			0.595	0.593	0.64	0.612	0.59	0.616	0.607667	0.00779173
21:05:09	0.689	0.687	0.733	0.705	0.683	0.709			0.597	0.595	0.641	0.613	0.591	0.617	0.609	0.0076768
21:10:09	0.69	0.687	0.733	0.707	0.683	0.711			0.598	0.595	0.641	0.615	0.591	0.619	0.609833	0.00773915
21:15:09	0.691	0.688	0.734	0.707	0.684	0.712			0.599	0.596	0.642	0.615	0.592	0.62	0.610667	0.00771866
21:20:09	0.691	0.69	0.736	0.708	0.685	0.714			0.599333	0.598333	0.644333	0.616333	0.593333	0.622333	0.612333	0.0078867
21:25:09	0.692	0.69	0.735	0.708	0.685	0.716			0.6	0.598	0.643	0.616	0.593	0.624	0.612333	0.00779173
21:30:09	0.694	0.692	0.736	0.71	0.686	0.717			0.602	0.6	0.644	0.618	0.594	0.625	0.613833	0.00769596
21:35:09	0.694	0.692	0.738	0.711	0.687	0.719			0.602333	0.600333	0.646333	0.619333	0.595333	0.627333	0.615167	0.00798923
21:40:09	0.695	0.694	0.739	0.712	0.689	0.721			0.603	0.602	0.647	0.62	0.597	0.629	0.616333	0.00789796
21:45:09	0.696	0.696	0.739	0.714	0.69	0.723			0.604	0.604	0.647	0.622	0.598	0.631	0.617667	0.00778317
21:50:09	0.697	0.696	0.741	0.716	0.691	0.725			0.605	0.604	0.649	0.624	0.599	0.633	0.619	0.0080457
21:55:09	0.698	0.697	0.741	0.717	0.692	0.724			0.606	0.605	0.649	0.625	0.6	0.632	0.6195	0.00780918
22:00:09	0.699	0.697	0.743	0.718	0.692	0.726			0.607	0.605	0.651	0.626	0.6	0.634	0.6205	0.00813531
22:05:09	0.701	0.698	0.743	0.718	0.694	0.727			0.609333	0.606333	0.651333	0.626333	0.602333	0.635333	0.621833	0.00785175
22:10:09	0.704	0.699	0.743	0.719	0.695	0.728			0.612333	0.607333	0.651333	0.627333	0.603333	0.636333	0.623	0.00762744
22:15:09	0.705	0.7	0.745	0.719	0.695	0.729			0.613333	0.608333	0.653333	0.627333	0.603333	0.637333	0.623833	0.00782198
22:20:09	0.706	0.7	0.746	0.719	0.696	0.731			0.614333	0.608333	0.654333	0.627333	0.604333	0.639333	0.624667	0.00793585
22:25:09	0.707	0.702	0.746	0.719	0.698	0.734			0.615333	0.610333	0.654333	0.627333	0.606333	0.642333	0.626	0.00778317
22:30:09	0.709	0.704	0.749	0.721	0.701	0.735			0.617333	0.612333	0.657333	0.629333	0.609333	0.643333	0.628167	0.00775636
22:35:09	0.709	0.704	0.749	0.722	0.702	0.735			0.617333	0.612333	0.657333	0.630333	0.610333	0.643333	0.6285	0.00768295
22:40:09	0.709	0.705	0.75	0.723	0.703	0.738			0.617333	0.613333	0.658333	0.631333	0.611333	0.646333	0.629667	0.00786836
22:45:09	0.711	0.706	0.751	0.725	0.705	0.738			0.619333	0.614333	0.659333	0.633333	0.613333	0.646333	0.631	0.0076797
22:50:09	0.711	0.707	0.752	0.725	0.705	0.74			0.619333	0.615333	0.660333	0.633333	0.613333	0.648333	0.631667	0.00786836
22:55:09	0.713	0.707	0.753	0.726	0.707	0.741			0.621333	0.615333	0.661333	0.634333	0.615333	0.649333	0.632833	0.00781345
23:00:09	0.715	0.709	0.753	0.728	0.708	0.743			0.623333	0.617333	0.661333	0.636333	0.616333	0.651333	0.634333	0.00765071
23:05:09	0.713	0.71	0.754	0.729	0.709	0.743			0.621333	0.618333	0.662333	0.637333	0.617333	0.651333	0.634667	0.00773592
23:10:09	0.714	0.711	0.755	0.731	0.71	0.744			0.622333	0.619333	0.663333	0.639333	0.618333	0.652333	0.635833	0.00774919
23:15:09	0.715	0.712	0.756	0.732	0.711	0.743			0.623333	0.620333	0.664333	0.640333	0.619333	0.651333	0.6365	0.00761322
23:20:09	0.717	0.712	0.757	0.733	0.713	0.745			0.625333	0.620333	0.665333	0.641333	0.621333	0.653333	0.637833	0.00762343
23:25:09	0.719	0.713	0.758	0.734	0.715	0.745			0.627333	0.621333	0.666333	0.642333	0.623333	0.653333	0.639	0.00743266
23:30:09	0.72	0.714	0.76	0.735	0.715	0.747			0.628333	0.622333	0.668333	0.643333	0.623333	0.655333	0.640167	0.00769163
23:35:09	0.722	0.715	0.76	0.735	0.715	0.747			0.630333	0.623333	0.668333	0.643333	0.623333	0.655333	0.640667	0.00751739
23:40:09	0.723	0.716	0.761	0.737	0.717	0.748			0.631333	0.624333	0.669333	0.645333	0.625333	0.656333	0.642	0.00745505
23:45:09	0.723	0.717	0.762	0.738	0.718	0.75			0.631333	0.625333	0.670333	0.646333	0.626333	0.658333	0.643	0.00757041
23:50:09	0.724	0.718	0.763	0.739	0.72	0.749			0.632333	0.626333	0.671333	0.647333	0.628333	0.657333	0.643833	0.00736998
23:55:09	0.725	0.718	0.764	0.741	0.722	0.752			0.633333	0.626333	0.672333	0.649333	0.630333	0.660333	0.645333	0.00752773
1 day, 0:00:09	0.726	0.721	0.766	0.742	0.722	0.754			0.634333	0.629333	0.674333	0.650333	0.630333	0.662333	0.646833	0.00762343
1 day, 0:05:09	0.726	0.722	0.766	0.743	0.724	0.756			0.634333	0.630333	0.674333	0.651333	0.632333	0.664333	0.647833	0.00756197
1 day, 0:10:09	0.727	0.724	0.765	0.747	0.726	0.757			0.635333	0.632333	0.673333	0.655333	0.634333	0.665333	0.649333	0.00725259
1 day, 0:15:09	0.729	0.726	0.766	0.748	0.727	0.757			0.637333	0.634333	0.674333	0.656333	0.635333	0.665333	0.6505	0.00703997
1 day, 0:20:09	0.729	0.726	0.767	0.75	0.728	0.76			0.637333	0.634333	0.675333	0.658333	0.636333	0.668333	0.651667	0.00735603
1 day, 0:25:09	0.73	0.728	0.77	0.75	0.729	0.761			0.638333	0.636333	0.678333	0.658333	0.637333	0.669333	0.653	0.00747291
1 day, 0:30:09	0.732	0.73	0.771	0.751	0.73	0.763			0.640333	0.638333	0.679333	0.659333	0.638333	0.671333	0.6545	0.00740908
1 day, 0:35:09	0.732	0.73	0.772	0.752	0.731	0.763			0.640333	0.638333	0.680333	0.660333	0.639333	0.671333	0.655	0.00747291
1 day, 0:40:09	0.734	0.731	0.774	0.754	0.732	0.763			0.642333	0.639333	0.682333	0.662333	0.640333	0.671333	0.656333	0.00747886
1 day, 0:45:09	0.735	0.732	0.775	0.756	0.732	0.765			0.643333	0.640333	0.683333	0.664333	0.640333	0.673333	0.6575	0.00764817
1 day, 0:50:09	0.736	0.733	0.776	0.757	0.734	0.767			0.644333	0.641333	0.684333	0.665333	0.642333	0.675333	0.658833	0.00764526
1 day, 0:55:09	0.737	0.736	0.779	0.758	0.735	0.768			0.645333	0.644333	0.687333	0.666333	0.643333	0.676333	0.6605	0.00772622
1 day, 1:00:09	0.738	0.736	0.78	0.758	0.737	0.769			0.646333	0.644333	0.688333	0.666333	0.645333	0.677333	0.661333	0.00770281
1 day, 1:05:09	0.74	0.738	0.781	0.759	0.74	0.771			0.648333	0.646333	0.689333	0.667333	0.648333	0.679333	0.663167	0.00749852
1 day, 1:10:09	0.743	0.738	0.783	0.76	0.741	0.773			0.651333	0.646333	0.691333	0.668333	0.649333	0.681333	0.664667	0.00764054
1 day, 1:15:09	0.743	0.739	0.785	0.761	0.741	0.773			0.651667	0.647667	0.693667	0.669667	0.649667	0.681667	0.665667	0.00781452
1 day, 1:20:09	0.744	0.741	0.786	0.762	0.743	0.775			0.652667	0.649667	0.694667	0.670667	0.651667	0.683667	0.667167	0.00774059
1 day, 1:25:09	0.745	0.743	0.788	0.763	0.743	0.776			0.653333	0.651333	0.696333	0.671333	0.651333	0.684333	0.668	0.00785564
1 day, 1:30:09	0.747	0.745	0.789	0.765	0.745	0.778			0.655667	0.653667	0.697667	0.673667	0.653667	0.686667	0.670167	0.00773628
1 day, 1:35:09	0.747	0.746	0.79	0.766	0.746	0.779			0.655667	0.654667	0.698667	0.674667	0.654667	0.687667	0.671	0.00780028
1 day, 1:40:09	0.749	0.75	0.791	0.768	0.748	0.78			0.657667	0.658667	0.699667	0.676667	0.656667	0.688667	0.673	0.00747737
1 day, 1:45:09	0.75	0.752	0.792	0.77	0.75	0.781			0.658667	0.660667	0.700667	0.678667	0.658667	0.689667	0.6745	0.00735942
1 day, 1:50:09	0.752	0.751	0.793	0.771	0.75	0.785			0.660667	0.659667	0.701667	0.679667	0.658667	0.693667	0.675667	0.00771578
1 day, 1:55:09	0.753	0.752	0.795	0.773	0.75	0.785			0.661667	0.660667	0.703667	0.681667	0.658667	0.693667	0.676667	0.00784857
1 day, 2:00:09	0.754	0.754	0.796	0.775	0.749	0.786			0.662667	0.662667	0.704667	0.683667	0.657667	0.694667	0.677667	0.0079666
1 day, 2:05:09	0.755	0.754	0.798	0.776	0.751	0.789			0.663667	0.662667	0.706667	0.684667	0.659667	0.697667	0.679167	0.00820874
1 day, 2:10:09	0.756	0.756	0.8	0.777	0.753	0.791			0.664667	0.664667	0.708667	0.685667	0.661667	0.699667	0.680833	0.00825194
1 day, 2:15:09	0.758	0.759	0.799	0.778	0.755	0.79			0.666667	0.667667	0.707667	0.686667	0.663667	0.698667	0.681833	0.00760446
1 day, 2:20:09	0.76	0.763	0.8	0.781	0.755	0.791			0.668667	0.671667	0.708667	0.689667	0.663667	0.699667	0.683667	0.00749667
1 day, 2:25:09	0.76	0.763	0.802	0.782	0.756	0.793			0.668667	0.671667	0.710667	0.690667	0.664667	0.701667	0.684667	0.00780171
1 day, 2:30:09	0.761	0.763	0.804	0.783	0.757	0.794			0.669667	0.671667	0.712667	0.691667	0.665667	0.702667	0.685667	0.00797078
1 day, 2:35:09	0.762	0.765	0.805	0.784	0.759	0.795			0.670667	0.673667	0.713667	0.692667	0.667667	0.703667	0.687	0.00783014
1 day, 2:40:09	0.764	0.765	0.805	0.785	0.759	0.797			0.672667	0.673667	0.713667	0.693667	0.667667	0.705667	0.687833	0.0078673
1 day, 2:45:09	0.765	0.767	0.806	0.785	0.76	0.799			0.673667	0.675667	0.714667	0.693667	0.668667	0.707667	0.689	0.00786412
1 day, 2:50:09	0.766	0.768	0.809	0.787	0.761	0.799			0.674667	0.676667	0.717667	0.695667	0.669667	0.707667	0.690333	0.00803188
1 day, 2:55:09	0.767	0.768	0.81	0.788	0.761	0.8			0.675667	0.676667	0.718667	0.696667	0.669667	0.708667	0.691	0.00817585
1 day, 3:00:09	0.768	0.77	0.81	0.789	0.762	0.8			0.676667	0.678667	0.718667	0.697667	0.670667	0.708667	0.691833	0.0079348
1 day, 3:05:09	0.77	0.772	0.811	0.791	0.763	0.801			0.678667	0.680667	0.719667	0.699667	0.671667	0.709667	0.693333	0.0078429
1 day, 3:10:09	0.771	0.772	0.809	0.792	0.765	0.805			0.679667	0.680667	0.717667	0.700667	0.673667	0.713667	0.694333	0.00771866
1 day, 3:15:09	0.772	0.774	0.809	0.793	0.766	0.806			0.680667	0.682667	0.717667	0.701667	0.674667	0.714667	0.695333	0.0075616
1 day, 3:20:09	0.773	0.777	0.811	0.795	0.766	0.805			0.681667	0.685667	0.719667	0.703667	0.674667	0.713667	0.6965	0.00752071
1 day, 3:25:09	0.773	0.779	0.812	0.795	0.767	0.809			0.681667	0.687667	0.720667	0.703667	0.675667	0.717667	0.697833	0.00775636
1 day, 3:30:09	0.775	0.78	0.813	0.795	0.769	0.81			0.683667	0.688667	0.721667	0.703667	0.677667	0.718667	0.699	0.00757041
1 day, 3:35:09	0.776	0.782	0.814	0.796	0.768	0.813			0.684667	0.690667	0.722667	0.704667	0.676667	0.721667	0.700167	0.00789831
1 day, 3:40:09	0.778	0.783	0.816	0.797	0.77	0.815			0.686667	0.691667	0.724667	0.705667	0.678667	0.723667	0.701833	0.00792219
1 day, 3:45:09	0.78	0.784	0.818	0.798	0.772	0.817			0.688667	0.692667	0.726667	0.706667	0.680667	0.725667	0.7035	0.00795159
1 day, 3:50:09	0.781	0.787	0.817	0.798	0.773	0.819			0.689667	0.695667	0.725667	0.706667	0.681667	0.727667	0.7045	0.00776495
1 day, 3:55:09	0.783	0.786	0.819	0.799	0.774	0.821			0.691667	0.694667	0.727667	0.707667	0.682667	0.729667	0.705667	0.00797914
1 day, 4:00:09	0.784	0.788	0.819	0.8	0.775	0.822			0.692667	0.696667	0.727667	0.708667	0.683667	0.730667	0.706667	0.00784432
1 day, 4:05:09	0.785	0.791	0.823	0.8	0.778	0.824			0.693667	0.699667	0.731667	0.708667	0.686667	0.732667	0.708833	0.0079474
1 day, 4:10:09	0.787	0.792	0.823	0.8	0.778	0.825			0.695667	0.700667	0.731667	0.708667	0.686667	0.733667	0.7095	0.00788846
1 day, 4:15:09	0.789	0.795	0.824	0.8	0.78	0.826			0.697667	0.703667	0.732667	0.708667	0.688667	0.734667	0.711	0.00767101
1 day, 4:20:09	0.79	0.796	0.825	0.8	0.783	0.828			0.698667	0.704667	0.733667	0.708667	0.691667	0.736667	0.712333	0.00760117
1 day, 4:25:09	0.791	0.797	0.826	0.801	0.785	0.832			0.699667	0.705667	0.734667	0.709667	0.693667	0.740667	0.714	0.0078429
1 day, 4:30:09	0.793	0.799	0.828	0.804	0.784	0.835			0.701667	0.707667	0.736667	0.712667	0.692667	0.743667	0.715833	0.00821144
1 day, 4:35:09	0.794	0.801	0.83	0.806	0.785	0.835			0.702667	0.709667	0.738667	0.714667	0.693667	0.743667	0.717167	0.0081435
1 day, 4:40:09	0.794	0.803	0.832	0.809	0.788	0.838			0.702667	0.711667	0.740667	0.717667	0.696667	0.746667	0.719333	0.00827714
1 day, 4:45:09	0.795	0.806	0.834	0.81	0.79	0.841			0.703667	0.714667	0.742667	0.718667	0.698667	0.749667	0.721333	0.00843669
1 day, 4:50:09	0.796	0.806	0.837	0.811	0.79	0.842			0.704667	0.714667	0.745667	0.719667	0.698667	0.750667	0.722333	0.00872799
1 day, 4:55:09	0.798	0.808	0.838	0.809	0.791	0.843			0.706667	0.716667	0.746667	0.717667	0.699667	0.751667	0.723167	0.00868236
1 day, 5:00:09	0.798	0.81	0.839	0.81	0.792	0.845			0.706667	0.718667	0.747667	0.718667	0.700667	0.753667	0.724333	0.00883428
1 day, 5:05:09	0.799	0.812	0.841	0.811	0.792	0.845			0.707667	0.720667	0.749667	0.719667	0.700667	0.753667	0.725333	0.00888694
1 day, 5:10:08	0.8	0.814	0.844	0.811	0.793	0.847			0.708667	0.722667	0.752667	0.719667	0.701667	0.755667	0.726833	0.00918483
1 day, 5:15:09	0.801	0.815	0.846	0.812	0.793	0.849			0.709667	0.723667	0.754667	0.720667	0.701667	0.757667	0.728	0.00947511
1 day, 5:20:09	0.803	0.815	0.846	0.813	0.795	0.85			0.711667	0.723667	0.754667	0.721667	0.703667	0.758667	0.729	0.00924362
1 day, 5:25:09	0.805	0.816	0.848	0.815	0.795	0.852			0.713667	0.724667	0.756667	0.723667	0.703667	0.760667	0.7305	0.00944957
1 day, 5:30:09	0.806	0.82	0.851	0.817	0.797	0.853			0.714667	0.728667	0.759667	0.725667	0.705667	0.761667	0.732667	0.00946573
1 day, 5:35:09	0.807	0.821	0.853	0.818	0.798	0.854			0.715667	0.729667	0.761667	0.726667	0.706667	0.762667	0.733833	0.00956179
1 day, 5:40:09	0.807	0.82	0.853	0.819	0.8	0.856			0.715667	0.728667	0.761667	0.727667	0.708667	0.764667	0.7345	0.00957572
1 day, 5:45:09	0.807	0.821	0.854	0.821	0.803	0.857			0.715667	0.729667	0.762667	0.729667	0.711667	0.765667	0.735833	0.00944605
1 day, 5:50:09	0.809	0.823	0.856	0.822	0.804	0.858			0.717667	0.731667	0.764667	0.730667	0.712667	0.766667	0.737333	0.00945046
1 day, 5:55:09	0.811	0.824	0.856	0.823	0.808	0.858			0.719667	0.732667	0.764667	0.731667	0.716667	0.766667	0.738667	0.00892562
1 day, 6:00:09	0.811	0.824	0.857	0.825	0.807	0.859			0.719667	0.732667	0.765667	0.733667	0.715667	0.767667	0.739167	0.00916424
1 day, 6:05:09	0.812	0.826	0.857	0.826	0.807	0.858			0.720667	0.734667	0.765667	0.734667	0.715667	0.766667	0.739667	0.00892935
1 day, 6:10:09	0.813	0.826	0.857	0.828	0.808	0.861			0.721667	0.734667	0.765667	0.736667	0.716667	0.769667	0.740833	0.00904587
1 day, 6:15:09	0.813	0.828	0.858	0.829	0.81	0.862			0.721667	0.736667	0.766667	0.737667	0.718667	0.770667	0.742	0.00900987
1 day, 6:20:09	0.812	0.83	0.86	0.831	0.811	0.864			0.720667	0.738667	0.768667	0.739667	0.719667	0.772667	0.743333	0.00932976
1 day, 6:25:09	0.814	0.831	0.861	0.833	0.811	0.865			0.722667	0.739667	0.769667	0.741667	0.719667	0.773667	0.7445	0.00932529
1 day, 6:30:09	0.815	0.83	0.862	0.835	0.813	0.866			0.723667	0.738667	0.770667	0.743667	0.721667	0.774667	0.7455	0.00927152
1 day, 6:35:09	0.816	0.832	0.862	0.836	0.815	0.869			0.724667	0.740667	0.770667	0.744667	0.723667	0.777667	0.747	0.00929038
1 day, 6:40:09	0.816	0.835	0.862	0.837	0.815	0.869			0.724667	0.743667	0.770667	0.745667	0.723667	0.777667	0.747667	0.00922677
1 day, 6:45:09	0.817	0.834	0.863	0.837	0.816	0.871			0.725667	0.742667	0.771667	0.745667	0.724667	0.779667	0.748333	0.00937965
1 day, 6:50:09	0.819	0.834	0.864	0.838	0.818	0.872			0.727667	0.742667	0.772667	0.746667	0.726667	0.780667	0.7495	0.00923911
1 day, 6:55:09	0.82	0.836	0.865	0.839	0.819	0.872			0.728667	0.744667	0.773667	0.747667	0.727667	0.780667	0.7505	0.00910464
1 day, 7:00:09	0.823	0.837	0.866	0.84	0.819	0.874			0.731667	0.745667	0.774667	0.748667	0.727667	0.782667	0.751833	0.00914847
1 day, 7:05:09	0.823	0.838	0.866	0.841	0.82	0.874			0.731667	0.746667	0.774667	0.749667	0.728667	0.782667	0.752333	0.00902835
1 day, 7:10:09	0.824	0.84	0.866	0.842	0.821	0.877			0.732667	0.748667	0.774667	0.750667	0.729667	0.785667	0.753667	0.00915787
1 day, 7:15:09	0.825	0.84	0.867	0.844	0.823	0.876			0.733667	0.748667	0.775667	0.752667	0.731667	0.784667	0.7545	0.00885218
1 day, 7:20:09	0.825	0.841	0.87	0.845	0.824	0.876			0.733667	0.749667	0.778667	0.753667	0.732667	0.784667	0.7555	0.00898672
1 day, 7:25:09	0.827	0.842	0.87	0.846	0.825	0.877			0.735667	0.750667	0.778667	0.754667	0.733667	0.785667	0.7565	0.00882201
1 day, 7:30:09	0.827	0.843	0.869	0.847	0.825	0.878			0.735667	0.751667	0.777667	0.755667	0.733667	0.786667	0.756833	0.00882578
1 day, 7:35:09	0.828	0.843	0.871	0.847	0.825	0.878			0.736667	0.751667	0.779667	0.755667	0.733667	0.786667	0.757333	0.00890942
1 day, 7:40:09	0.829	0.843	0.871	0.849	0.826	0.88			0.737667	0.751667	0.779667	0.757667	0.734667	0.788667	0.758333	0.00895793
1 day, 7:45:09	0.828	0.845	0.871	0.85	0.826	0.879			0.736667	0.753667	0.779667	0.758667	0.734667	0.787667	0.7585	0.00888225
1 day, 7:50:09	0.828	0.846	0.873	0.852	0.827	0.881			0.736667	0.754667	0.781667	0.760667	0.735667	0.789667	0.759833	0.00915575
1 day, 7:55:09	0.83	0.849	0.873	0.854	0.828	0.881			0.738667	0.757667	0.781667	0.762667	0.736667	0.789667	0.761167	0.0088572
1 day, 8:00:09	0.833	0.851	0.874	0.855	0.828	0.882			0.741667	0.759667	0.782667	0.763667	0.736667	0.790667	0.7625	0.00877655
1 day, 8:05:09	0.834	0.851	0.874	0.856	0.828	0.884			0.742667	0.759667	0.782667	0.764667	0.736667	0.792667	0.763167	0.00892095
1 day, 8:10:09	0.834	0.851	0.875	0.856	0.83	0.884			0.742667	0.759667	0.783667	0.764667	0.738667	0.792667	0.763667	0.00880152
1 day, 8:15:09	0.834	0.852	0.876	0.857	0.832	0.884			0.742667	0.760667	0.784667	0.765667	0.740667	0.792667	0.7645	0.00868108
1 day, 8:20:09	0.834	0.854	0.877	0.858	0.832	0.886			0.742667	0.762667	0.785667	0.766667	0.740667	0.794667	0.7655	0.00895327
1 day, 8:25:09	0.835	0.854	0.878	0.858	0.831	0.885			0.743667	0.762667	0.786667	0.766667	0.739667	0.793667	0.7655	0.00893464
1 day, 8:30:09	0.835	0.854	0.877	0.859	0.831	0.888			0.743667	0.762667	0.785667	0.767667	0.739667	0.796667	0.766	0.00918937
[truncated: 186 more rows]

## Sheet: W3-L
Time	A5	B10	D1	E4	F8	G11		raw data - medium control mean	A5	B10	D1	E4	F8	G11	mean	se
[truncated: 577 more rows]

[truncated: 10 more sheets: delserCGA-1, M1-L, M2-Lop, M2-L, delserCGA-2, M3-L, M4-L, summary_graphs, calculations, statistical_tests]
