# Supplementary material for: The birth of a bacterial tRNA gene by large-scale, tandem duplication events
Source: eLife. 2020 Oct 30;9:e57947. doi: 10.7554/eLife.57947 (PMC7661048; doi:10.7554/eLife.57947)
Supplement: Figure 4—source data 1. — Raw absorbance reads are provided for each sample, as well as plots of absorbance over time for each genotype, calculations of maximum growth rate and lag time, and details of statistical tests used to detect differences in growth profiles between genotypes. [file elife-57947-fig4-data1.xlsx]

## Sheet: raw_data
Source data for Figure 4C, 4D
This tab contains the raw absorbance reads for the growth curves and Vmax measurements
						Medium	Strain	#reps		Method
						LB+Gm (20 ug/ml) - no ITPG	SBW25+pSXn	6		BreatheEasy memebrane: single colonies on LB+Gm plates, overnight into 200 ul LB+Gm (20 ug/ml) with 28˚C shaking. Then 2 ul into 98 ul LB+Gm (20 ug/ml) in 96 well plate with BreathEasy membrane. Read into BioTek plate reader on lab standard settings.
Software Version	3.03.14					LB+Gm (20 ug/ml) - no ITPG	SBW25+pSXn-serTGA	6
						LB+Gm (20 ug/ml) - no ITPG	SBW25+pSXn-serCGA	6
Experiment File Path:	C:\Users\user\Desktop\Gokce\200207-pSX-strains-LBGM-28C.xpt					LB+Gm (20 ug/ml) - no ITPG	delserCGA1+pSXn	6
Protocol File Path:	C:\Users\user\Desktop\Gokce\GA-Pf_24h_28C.prt					LB+Gm (20 ug/ml) - no ITPG	delserCGA1+pSXn-serTGA	6
Plate Number	Plate 1					LB+Gm (20 ug/ml) - no ITPG	delserCGA1+pSXn-serCGA	6
Date	2020-02-07					LB+Gm (20 ug/ml) - no ITPG	delserCGA2+pSXn	6
Time	10:19:56					LB+Gm (20 ug/ml) - no ITPG	delserCGA2+pSXn-serTGA	6
Reader Type:	Epoch 2					LB+Gm (20 ug/ml) - no ITPG	delserCGA2+pSXn-serCGA	6
Reader Serial Number:	1711135					LB+Gm (20 ug/ml) - no ITPG	medium control	8
Reading Type	Reader					LB+Gm (20 ug/ml) - no ITPG	unused wells (filled with medium)	34
								96
Procedure Details
Plate Type	96 WELL PLATE (Use plate lid)
Eject plate on completion
Set Temperature	Setpoint 28°C, Gradient 2 °C
	Preheat before moving to next step
Start Kinetic	Runtime 24:00:00 (HH:MM:SS), Interval 0:05:00, 289 Reads
Shake	Orbital: 0:05 (MM:SS)
	Frequency: 282 cpm (3 mm)
Read	Absorbance Endpoint
	Full Plate
	Wavelengths: 600
	Read Speed: Normal, Delay: 100 msec, Measurements/Data Point: 8
End Kinetic
Layout
		1	2	3	4	5	6	7	8	9	10	11	12
	A	unused	unused	medium control	medium control	medium control	medium control	unused	unused	unused	unused	unused	unused
	B	unused	SBW25+pSXn	SBW25+pSXn-serTGA	SBW25+pSXn-serCGA	SBW25+pSXn	SBW25+pSXn-serTGA	SBW25+pSXn-serCGA	SBW25+pSXn	SBW25+pSXn-serTGA	SBW25+pSXn-serCGA	unused	unused
	C	unused	delserCGA1+pSXn	delserCGA1+pSXn-serTGA	delserCGA1+pSXn-serCGA	delserCGA1+pSXn	delserCGA1+pSXn-serTGA	delserCGA1+pSXn-serCGA	delserCGA1+pSXn	delserCGA1+pSXn-serTGA	delserCGA1+pSXn-serCGA	unused	unused
	D	unused	delserCGA2+pSXn	delserCGA2+pSXn-serTGA	delserCGA2+pSXn-serCGA	delserCGA2+pSXn	delserCGA2+pSXn-serTGA	delserCGA2+pSXn-serCGA	delserCGA2+pSXn	delserCGA2+pSXn-serTGA	delserCGA2+pSXn-serCGA	unused	unused
	E	unused	SBW25+pSXn-serCGA	SBW25+pSXn	SBW25+pSXn-serTGA	SBW25+pSXn-serCGA	SBW25+pSXn	SBW25+pSXn-serTGA	SBW25+pSXn-serCGA	SBW25+pSXn	SBW25+pSXn-serTGA	unused	unused
	F	unused	delserCGA1+pSXn-serCGA	delserCGA1+pSXn	delserCGA1+pSXn-serTGA	delserCGA1+pSXn-serCGA	delserCGA1+pSXn	delserCGA1+pSXn-serTGA	delserCGA1+pSXn-serCGA	delserCGA1+pSXn	delserCGA1+pSXn-serTGA	unused	unused
	G	unused	delserCGA2+pSXn-serCGA	delserCGA2+pSXn	delserCGA2+pSXn-serTGA	delserCGA2+pSXn-serCGA	delserCGA2+pSXn	delserCGA2+pSXn-serTGA	delserCGA2+pSXn-serCGA	delserCGA2+pSXn	delserCGA2+pSXn-serTGA	unused	unused
	H	unused	unused	unused	unused	unused	medium control	medium control	medium control	medium control	unused	unused	unused
600
	Time	T° 600	A1	A2	A3	A4	A5	A6	A7	A8	A9	A10	A11	A12	B1	B2	B3	B4	B5	B6	B7	B8	B9	B10	B11	B12	C1	C2	C3	C4	C5	C6	C7	C8	C9	C10	C11	C12	D1	D2	D3	D4	D5	D6	D7	D8	D9	D10	D11
	00:00:09	28.3	0.088	0.091	0.091	0.093	0.09	0.089	0.093	0.088	0.093	0.098	0.103	0.094	0.091	0.108	0.107	0.112	0.103	0.106	0.101	0.1	0.107	0.113	0.1	0.093	0.088	0.113	0.107	0.107	0.104	0.1	0.106	0.107	0.098	0.106	0.091	0.089	0.093	0.106	0.107	0.097	0.099	0.1	0.098	0.102	0.111	0.102	0.092
	00:05:09	28.3	0.088	0.091	0.091	0.093	0.09	0.089	0.093	0.088	0.093	0.098	0.102	0.094	0.091	0.108	0.103	0.11	0.107	0.105	0.11	0.108	0.111	0.119	0.1	0.093	0.088	0.107	0.11	0.106	0.103	0.101	0.113	0.107	0.097	0.111	0.091	0.089	0.093	0.098	0.106	0.109	0.103	0.102	0.098	0.105	0.112	0.11	0.092
	00:10:09	28.3	0.088	0.091	0.091	0.092	0.09	0.089	0.093	0.088	0.092	0.098	0.101	0.094	0.091	0.107	0.105	0.109	0.105	0.105	0.108	0.111	0.111	0.119	0.099	0.093	0.088	0.105	0.112	0.106	0.102	0.105	0.114	0.108	0.102	0.111	0.091	0.089	0.093	0.101	0.109	0.109	0.102	0.102	0.101	0.106	0.116	0.115	0.092
	00:15:09	28.3	0.088	0.091	0.091	0.093	0.09	0.089	0.093	0.088	0.092	0.098	0.101	0.094	0.091	0.108	0.105	0.109	0.106	0.105	0.109	0.109	0.109	0.119	0.099	0.092	0.088	0.105	0.112	0.11	0.103	0.108	0.118	0.111	0.113	0.111	0.091	0.089	0.093	0.102	0.11	0.105	0.104	0.102	0.102	0.113	0.124	0.111	0.092
	00:20:09	28.3	0.088	0.091	0.09	0.092	0.09	0.089	0.093	0.088	0.092	0.098	0.1	0.094	0.091	0.109	0.108	0.108	0.107	0.107	0.109	0.112	0.111	0.119	0.099	0.092	0.088	0.109	0.117	0.112	0.106	0.107	0.115	0.113	0.112	0.112	0.091	0.089	0.093	0.104	0.112	0.111	0.105	0.105	0.103	0.111	0.121	0.111	0.092
	00:25:09	28.3	0.088	0.091	0.09	0.092	0.09	0.089	0.093	0.088	0.092	0.098	0.1	0.094	0.091	0.11	0.109	0.108	0.108	0.107	0.11	0.113	0.112	0.12	0.099	0.092	0.088	0.109	0.116	0.11	0.108	0.108	0.115	0.114	0.111	0.112	0.091	0.089	0.093	0.106	0.113	0.11	0.107	0.106	0.105	0.111	0.119	0.111	0.092
	00:30:09	28.3	0.088	0.091	0.09	0.092	0.09	0.089	0.092	0.088	0.092	0.098	0.099	0.094	0.091	0.112	0.107	0.108	0.108	0.107	0.111	0.113	0.112	0.119	0.099	0.092	0.088	0.11	0.115	0.111	0.108	0.11	0.115	0.115	0.109	0.112	0.091	0.089	0.093	0.106	0.112	0.109	0.108	0.106	0.107	0.111	0.119	0.111	0.092
	00:35:09	28.3	0.088	0.09	0.09	0.092	0.09	0.089	0.092	0.088	0.092	0.099	0.099	0.094	0.091	0.112	0.107	0.108	0.109	0.107	0.112	0.115	0.113	0.119	0.099	0.092	0.088	0.11	0.115	0.112	0.109	0.11	0.115	0.116	0.11	0.112	0.091	0.089	0.093	0.107	0.113	0.111	0.108	0.108	0.106	0.111	0.12	0.112	0.092
	00:40:09	28.3	0.088	0.09	0.09	0.092	0.09	0.089	0.092	0.088	0.092	0.098	0.098	0.094	0.091	0.111	0.11	0.11	0.109	0.108	0.113	0.116	0.113	0.119	0.099	0.092	0.088	0.11	0.117	0.112	0.11	0.111	0.115	0.117	0.109	0.112	0.091	0.089	0.093	0.107	0.115	0.111	0.108	0.108	0.106	0.112	0.121	0.112	0.092
	00:45:09	28.3	0.088	0.09	0.09	0.092	0.09	0.089	0.092	0.088	0.092	0.098	0.098	0.094	0.091	0.112	0.111	0.111	0.11	0.109	0.114	0.117	0.113	0.12	0.099	0.092	0.088	0.111	0.117	0.114	0.11	0.112	0.116	0.117	0.111	0.113	0.091	0.089	0.093	0.108	0.116	0.113	0.108	0.11	0.107	0.112	0.121	0.112	0.092
	00:50:09	28.3	0.088	0.091	0.09	0.092	0.09	0.089	0.092	0.088	0.092	0.098	0.098	0.094	0.091	0.113	0.111	0.111	0.109	0.11	0.114	0.116	0.114	0.119	0.099	0.091	0.088	0.112	0.118	0.113	0.111	0.114	0.115	0.118	0.112	0.113	0.091	0.089	0.093	0.109	0.117	0.113	0.109	0.111	0.107	0.112	0.121	0.113	0.092
	00:55:09	28.3	0.088	0.09	0.09	0.092	0.09	0.089	0.092	0.088	0.092	0.098	0.098	0.094	0.091	0.113	0.112	0.111	0.11	0.11	0.114	0.116	0.114	0.12	0.099	0.091	0.088	0.114	0.12	0.113	0.111	0.116	0.115	0.119	0.113	0.114	0.09	0.089	0.093	0.11	0.118	0.113	0.11	0.113	0.108	0.113	0.121	0.113	0.092
	01:00:09	28.3	0.088	0.09	0.09	0.092	0.09	0.089	0.092	0.088	0.092	0.098	0.098	0.094	0.091	0.114	0.112	0.112	0.11	0.111	0.115	0.115	0.114	0.12	0.099	0.091	0.088	0.114	0.121	0.114	0.111	0.118	0.115	0.119	0.114	0.114	0.09	0.089	0.093	0.111	0.118	0.114	0.111	0.114	0.108	0.113	0.122	0.113	0.092
	01:05:09	28.3	0.088	0.09	0.09	0.092	0.09	0.088	0.092	0.088	0.092	0.098	0.097	0.094	0.091	0.115	0.113	0.113	0.111	0.112	0.116	0.116	0.115	0.12	0.099	0.091	0.088	0.113	0.122	0.115	0.112	0.12	0.115	0.12	0.115	0.114	0.09	0.089	0.093	0.111	0.119	0.114	0.112	0.116	0.109	0.113	0.122	0.113	0.092
	01:10:09	28.3	0.088	0.09	0.09	0.092	0.09	0.089	0.092	0.088	0.092	0.098	0.097	0.094	0.091	0.115	0.113	0.114	0.112	0.113	0.117	0.117	0.116	0.121	0.099	0.091	0.088	0.115	0.124	0.116	0.113	0.122	0.115	0.121	0.116	0.115	0.09	0.089	0.093	0.112	0.12	0.115	0.112	0.115	0.109	0.114	0.123	0.114	0.092
	01:15:09	28.3	0.088	0.09	0.09	0.092	0.09	0.089	0.092	0.088	0.092	0.098	0.097	0.094	0.091	0.116	0.114	0.114	0.112	0.114	0.118	0.118	0.116	0.121	0.099	0.091	0.088	0.115	0.126	0.116	0.115	0.123	0.116	0.121	0.118	0.116	0.091	0.089	0.093	0.113	0.121	0.115	0.113	0.115	0.11	0.114	0.123	0.114	0.092
	01:20:09	28.3	0.088	0.09	0.09	0.092	0.09	0.089	0.092	0.088	0.092	0.098	0.096	0.093	0.091	0.117	0.115	0.115	0.114	0.115	0.12	0.119	0.117	0.122	0.099	0.091	0.088	0.116	0.127	0.117	0.116	0.124	0.116	0.122	0.12	0.117	0.09	0.089	0.093	0.113	0.122	0.116	0.114	0.115	0.111	0.115	0.124	0.115	0.092
	01:25:09	28.3	0.088	0.09	0.09	0.092	0.09	0.089	0.092	0.088	0.092	0.098	0.096	0.093	0.092	0.118	0.116	0.115	0.115	0.116	0.122	0.121	0.118	0.124	0.099	0.091	0.088	0.117	0.128	0.118	0.118	0.124	0.117	0.123	0.122	0.119	0.091	0.089	0.093	0.115	0.123	0.118	0.116	0.116	0.112	0.116	0.125	0.115	0.092
	01:30:09	28.3	0.088	0.09	0.09	0.092	0.09	0.089	0.092	0.088	0.092	0.098	0.096	0.094	0.092	0.12	0.117	0.117	0.117	0.118	0.123	0.122	0.12	0.126	0.099	0.091	0.088	0.118	0.128	0.119	0.12	0.125	0.118	0.125	0.124	0.121	0.091	0.089	0.093	0.116	0.125	0.119	0.117	0.117	0.113	0.116	0.126	0.117	0.092
	01:35:09	28.3	0.088	0.09	0.09	0.092	0.09	0.089	0.092	0.088	0.092	0.098	0.096	0.093	0.091	0.122	0.118	0.118	0.119	0.12	0.124	0.124	0.122	0.128	0.099	0.091	0.088	0.119	0.128	0.121	0.121	0.126	0.119	0.126	0.127	0.122	0.091	0.089	0.093	0.117	0.126	0.121	0.119	0.119	0.114	0.117	0.128	0.118	0.092
	01:40:09	28.3	0.088	0.09	0.09	0.092	0.09	0.089	0.092	0.088	0.092	0.098	0.096	0.093	0.092	0.125	0.121	0.12	0.121	0.121	0.125	0.124	0.123	0.129	0.099	0.091	0.088	0.12	0.129	0.123	0.123	0.128	0.121	0.127	0.129	0.123	0.09	0.089	0.093	0.118	0.126	0.122	0.121	0.12	0.116	0.118	0.129	0.12	0.092
	01:45:09	28.3	0.088	0.09	0.09	0.092	0.09	0.089	0.092	0.088	0.092	0.098	0.095	0.093	0.092	0.128	0.123	0.122	0.122	0.122	0.125	0.126	0.125	0.131	0.099	0.091	0.088	0.122	0.13	0.124	0.123	0.13	0.122	0.129	0.132	0.125	0.091	0.089	0.093	0.12	0.127	0.123	0.122	0.12	0.117	0.119	0.13	0.122	0.092
	01:50:09	28.3	0.088	0.09	0.09	0.092	0.09	0.089	0.092	0.088	0.092	0.098	0.095	0.093	0.092	0.132	0.126	0.124	0.124	0.124	0.127	0.129	0.127	0.133	0.099	0.091	0.088	0.124	0.13	0.125	0.124	0.133	0.124	0.13	0.135	0.128	0.091	0.089	0.092	0.123	0.128	0.124	0.123	0.122	0.118	0.12	0.132	0.124	0.092
	01:55:09	28.3	0.088	0.09	0.09	0.092	0.09	0.089	0.092	0.088	0.092	0.098	0.095	0.093	0.092	0.137	0.129	0.126	0.127	0.127	0.13	0.132	0.13	0.135	0.099	0.091	0.088	0.127	0.13	0.126	0.124	0.134	0.126	0.131	0.138	0.13	0.091	0.089	0.093	0.127	0.13	0.125	0.124	0.123	0.119	0.122	0.133	0.126	0.092
	02:00:09	28.3	0.088	0.09	0.09	0.092	0.09	0.089	0.092	0.088	0.092	0.098	0.095	0.093	0.091	0.139	0.132	0.129	0.131	0.13	0.134	0.135	0.134	0.138	0.099	0.091	0.088	0.128	0.135	0.129	0.125	0.134	0.127	0.132	0.142	0.132	0.09	0.089	0.093	0.131	0.131	0.127	0.125	0.124	0.12	0.125	0.135	0.128	0.092
	02:05:09	28.3	0.088	0.09	0.09	0.092	0.09	0.089	0.092	0.088	0.092	0.098	0.095	0.093	0.092	0.137	0.136	0.133	0.136	0.134	0.139	0.138	0.137	0.141	0.099	0.091	0.088	0.129	0.136	0.132	0.126	0.132	0.129	0.132	0.143	0.136	0.091	0.089	0.093	0.135	0.133	0.13	0.126	0.125	0.122	0.125	0.137	0.13	0.092
	02:10:09	28.3	0.088	0.09	0.09	0.092	0.09	0.089	0.092	0.088	0.092	0.098	0.095	0.093	0.092	0.134	0.14	0.136	0.138	0.137	0.141	0.14	0.138	0.143	0.099	0.091	0.088	0.131	0.139	0.134	0.127	0.13	0.132	0.133	0.142	0.138	0.091	0.089	0.093	0.137	0.134	0.133	0.127	0.126	0.123	0.127	0.139	0.133	0.092
	02:15:09	28.3	0.088	0.09	0.09	0.092	0.09	0.089	0.092	0.088	0.092	0.098	0.095	0.093	0.092	0.133	0.142	0.141	0.134	0.137	0.137	0.139	0.139	0.146	0.099	0.091	0.088	0.138	0.142	0.134	0.126	0.132	0.135	0.134	0.14	0.14	0.091	0.089	0.093	0.139	0.134	0.135	0.128	0.13	0.125	0.128	0.142	0.138	0.092
	02:20:09	28.3	0.088	0.09	0.09	0.092	0.09	0.089	0.092	0.088	0.092	0.098	0.095	0.093	0.092	0.134	0.141	0.141	0.129	0.135	0.135	0.138	0.138	0.148	0.099	0.091	0.088	0.142	0.145	0.132	0.127	0.131	0.14	0.136	0.14	0.14	0.091	0.089	0.093	0.14	0.135	0.133	0.129	0.136	0.128	0.13	0.146	0.142	0.092
	02:25:09	28.3	0.088	0.09	0.09	0.092	0.09	0.088	0.092	0.088	0.092	0.098	0.095	0.093	0.091	0.135	0.142	0.138	0.131	0.134	0.134	0.14	0.14	0.149	0.098	0.091	0.088	0.144	0.147	0.131	0.127	0.134	0.142	0.137	0.142	0.141	0.09	0.089	0.092	0.141	0.137	0.13	0.13	0.136	0.133	0.131	0.147	0.144	0.092
	02:30:09	28.3	0.088	0.09	0.09	0.092	0.09	0.089	0.092	0.088	0.092	0.098	0.095	0.093	0.092	0.138	0.139	0.135	0.135	0.132	0.136	0.139	0.139	0.148	0.098	0.091	0.088	0.146	0.15	0.132	0.128	0.135	0.143	0.139	0.14	0.14	0.09	0.089	0.093	0.142	0.139	0.132	0.129	0.135	0.137	0.132	0.149	0.148	0.092
	02:35:09	28.3	0.088	0.09	0.09	0.092	0.09	0.089	0.092	0.088	0.092	0.098	0.095	0.093	0.092	0.14	0.136	0.134	0.139	0.135	0.14	0.142	0.141	0.148	0.098	0.091	0.088	0.145	0.152	0.133	0.13	0.137	0.143	0.14	0.138	0.141	0.09	0.089	0.093	0.14	0.14	0.135	0.129	0.135	0.139	0.133	0.15	0.148	0.092
	02:40:09	28.3	0.088	0.09	0.09	0.092	0.09	0.089	0.092	0.088	0.092	0.098	0.095	0.093	0.092	0.141	0.136	0.135	0.141	0.138	0.147	0.144	0.144	0.149	0.099	0.091	0.088	0.143	0.154	0.134	0.131	0.138	0.143	0.144	0.138	0.142	0.091	0.089	0.093	0.141	0.14	0.138	0.13	0.134	0.139	0.135	0.15	0.146	0.092
	02:45:09	28.3	0.088	0.09	0.09	0.092	0.09	0.089	0.092	0.088	0.092	0.098	0.095	0.093	0.091	0.139	0.137	0.136	0.143	0.14	0.149	0.145	0.145	0.15	0.098	0.091	0.088	0.14	0.155	0.136	0.133	0.14	0.141	0.146	0.138	0.145	0.091	0.089	0.092	0.143	0.142	0.14	0.133	0.133	0.138	0.138	0.149	0.144	0.092
	02:50:09	28.3	0.088	0.09	0.09	0.092	0.09	0.089	0.092	0.088	0.092	0.098	0.095	0.093	0.092	0.141	0.14	0.138	0.143	0.142	0.152	0.148	0.148	0.153	0.098	0.091	0.088	0.135	0.157	0.138	0.134	0.141	0.141	0.15	0.137	0.148	0.09	0.089	0.092	0.14	0.145	0.141	0.135	0.134	0.137	0.14	0.148	0.143	0.091
	02:55:09	28.3	0.088	0.09	0.09	0.092	0.09	0.089	0.092	0.088	0.092	0.098	0.095	0.093	0.092	0.147	0.142	0.141	0.143	0.147	0.155	0.151	0.151	0.155	0.098	0.091	0.088	0.135	0.158	0.14	0.136	0.143	0.142	0.15	0.138	0.151	0.091	0.089	0.092	0.14	0.145	0.143	0.137	0.137	0.139	0.144	0.151	0.145	0.092
	03:00:09	28.3	0.089	0.09	0.09	0.092	0.09	0.089	0.092	0.089	0.092	0.098	0.095	0.093	0.092	0.152	0.143	0.144	0.145	0.151	0.156	0.153	0.152	0.157	0.099	0.09	0.088	0.137	0.16	0.145	0.137	0.144	0.143	0.148	0.139	0.154	0.091	0.089	0.092	0.14	0.147	0.147	0.139	0.139	0.139	0.146	0.151	0.146	0.092
	03:05:09	28.3	0.088	0.09	0.09	0.092	0.09	0.089	0.092	0.088	0.092	0.098	0.095	0.093	0.092	0.155	0.145	0.144	0.15	0.155	0.159	0.156	0.155	0.16	0.099	0.09	0.087	0.138	0.162	0.149	0.138	0.145	0.144	0.147	0.142	0.157	0.091	0.089	0.092	0.138	0.152	0.15	0.141	0.141	0.14	0.148	0.153	0.148	0.092
	03:10:09	28.3	0.088	0.09	0.09	0.092	0.09	0.089	0.092	0.088	0.092	0.098	0.095	0.093	0.092	0.157	0.146	0.148	0.155	0.158	0.164	0.161	0.158	0.165	0.099	0.09	0.088	0.139	0.164	0.152	0.139	0.148	0.148	0.148	0.146	0.162	0.091	0.089	0.092	0.138	0.154	0.153	0.143	0.143	0.138	0.147	0.159	0.152	0.092
	03:15:09	28.3	0.088	0.09	0.09	0.092	0.09	0.089	0.092	0.088	0.092	0.098	0.095	0.093	0.092	0.16	0.148	0.151	0.158	0.159	0.166	0.162	0.161	0.167	0.099	0.09	0.088	0.139	0.166	0.152	0.14	0.149	0.149	0.147	0.15	0.164	0.091	0.089	0.092	0.138	0.157	0.155	0.144	0.145	0.14	0.147	0.157	0.153	0.092
	03:20:09	28.3	0.088	0.09	0.09	0.092	0.09	0.089	0.092	0.088	0.092	0.098	0.095	0.093	0.092	0.163	0.149	0.152	0.157	0.162	0.167	0.163	0.164	0.17	0.099	0.09	0.088	0.141	0.168	0.154	0.142	0.151	0.152	0.147	0.149	0.168	0.091	0.089	0.092	0.139	0.16	0.158	0.144	0.147	0.142	0.148	0.159	0.157	0.092
	03:25:09	28.3	0.089	0.09	0.09	0.092	0.09	0.089	0.092	0.088	0.092	0.098	0.095	0.093	0.092	0.166	0.148	0.151	0.161	0.164	0.171	0.167	0.167	0.175	0.099	0.09	0.088	0.143	0.17	0.155	0.144	0.154	0.155	0.149	0.153	0.17	0.091	0.089	0.092	0.142	0.162	0.161	0.145	0.149	0.146	0.146	0.162	0.16	0.092
	03:30:09	28.3	0.088	0.09	0.09	0.092	0.09	0.089	0.092	0.088	0.092	0.098	0.095	0.093	0.092	0.169	0.149	0.149	0.164	0.166	0.173	0.169	0.17	0.177	0.099	0.09	0.088	0.144	0.172	0.155	0.145	0.157	0.158	0.151	0.152	0.173	0.091	0.089	0.092	0.142	0.165	0.163	0.146	0.151	0.152	0.143	0.165	0.164	0.092
	03:35:09	28.3	0.088	0.09	0.09	0.092	0.09	0.089	0.092	0.088	0.092	0.098	0.095	0.093	0.092	0.171	0.151	0.157	0.168	0.169	0.175	0.171	0.173	0.18	0.099	0.09	0.088	0.146	0.174	0.156	0.147	0.159	0.162	0.15	0.153	0.176	0.091	0.089	0.092	0.143	0.167	0.166	0.147	0.153	0.158	0.143	0.167	0.166	0.092
	03:40:09	28.3	0.088	0.09	0.09	0.092	0.09	0.089	0.092	0.088	0.092	0.098	0.095	0.093	0.092	0.174	0.154	0.161	0.171	0.17	0.177	0.173	0.176	0.181	0.099	0.09	0.088	0.148	0.175	0.159	0.148	0.162	0.163	0.153	0.155	0.177	0.091	0.089	0.092	0.144	0.169	0.168	0.149	0.156	0.161	0.144	0.167	0.171	0.092
	03:45:09	28.3	0.089	0.09	0.09	0.092	0.09	0.089	0.092	0.088	0.092	0.098	0.095	0.093	0.092	0.177	0.16	0.163	0.174	0.174	0.18	0.176	0.177	0.187	0.099	0.09	0.088	0.148	0.178	0.16	0.15	0.163	0.167	0.156	0.157	0.185	0.091	0.089	0.092	0.147	0.171	0.171	0.151	0.158	0.164	0.148	0.171	0.173	0.092
	03:50:09	28.3	0.088	0.09	0.09	0.092	0.09	0.089	0.092	0.088	0.092	0.098	0.094	0.093	0.092	0.18	0.165	0.163	0.177	0.176	0.183	0.182	0.178	0.192	0.099	0.09	0.088	0.149	0.18	0.162	0.151	0.168	0.167	0.156	0.159	0.183	0.091	0.089	0.092	0.149	0.172	0.173	0.153	0.161	0.166	0.153	0.172	0.176	0.092
	03:55:09	28.3	0.089	0.09	0.09	0.092	0.09	0.089	0.092	0.088	0.092	0.098	0.095	0.093	0.092	0.183	0.168	0.169	0.179	0.178	0.185	0.184	0.185	0.194	0.099	0.09	0.088	0.149	0.183	0.166	0.152	0.168	0.17	0.161	0.162	0.188	0.091	0.089	0.092	0.151	0.175	0.175	0.154	0.163	0.161	0.152	0.175	0.179	0.092
	04:00:09	28.3	0.089	0.09	0.09	0.092	0.09	0.089	0.092	0.088	0.092	0.098	0.095	0.093	0.092	0.186	0.17	0.173	0.182	0.181	0.193	0.19	0.186	0.196	0.099	0.09	0.088	0.154	0.185	0.169	0.154	0.176	0.174	0.164	0.165	0.194	0.091	0.089	0.092	0.153	0.178	0.179	0.156	0.166	0.163	0.151	0.178	0.184	0.092
	04:05:09	28.3	0.088	0.09	0.09	0.092	0.09	0.089	0.092	0.088	0.092	0.098	0.095	0.093	0.092	0.189	0.172	0.175	0.186	0.182	0.193	0.196	0.185	0.201	0.099	0.09	0.088	0.155	0.188	0.174	0.156	0.175	0.177	0.168	0.169	0.198	0.091	0.089	0.092	0.155	0.18	0.182	0.157	0.169	0.166	0.152	0.179	0.187	0.092
	04:10:09	28.3	0.088	0.09	0.09	0.092	0.09	0.089	0.092	0.088	0.092	0.098	0.094	0.093	0.092	0.191	0.175	0.177	0.188	0.187	0.198	0.198	0.193	0.203	0.098	0.09	0.088	0.155	0.19	0.177	0.156	0.183	0.179	0.171	0.173	0.2	0.091	0.089	0.092	0.157	0.183	0.184	0.158	0.171	0.169	0.154	0.183	0.19	0.092
	04:15:09	28.3	0.088	0.09	0.09	0.092	0.09	0.089	0.092	0.088	0.092	0.098	0.094	0.093	0.092	0.195	0.181	0.181	0.191	0.19	0.202	0.203	0.194	0.205	0.098	0.09	0.088	0.157	0.193	0.18	0.159	0.182	0.182	0.171	0.177	0.202	0.091	0.089	0.092	0.159	0.186	0.188	0.16	0.174	0.173	0.156	0.183	0.194	0.092
	04:20:09	28.3	0.088	0.09	0.09	0.092	0.09	0.089	0.092	0.088	0.092	0.098	0.095	0.093	0.092	0.198	0.185	0.184	0.194	0.195	0.206	0.208	0.197	0.209	0.099	0.09	0.088	0.16	0.196	0.183	0.162	0.189	0.185	0.174	0.181	0.209	0.091	0.089	0.092	0.161	0.189	0.19	0.163	0.177	0.178	0.159	0.188	0.197	0.092
	04:25:09	28.3	0.088	0.09	0.09	0.092	0.09	0.089	0.092	0.088	0.092	0.098	0.094	0.093	0.092	0.201	0.188	0.186	0.197	0.199	0.209	0.212	0.2	0.214	0.099	0.09	0.088	0.162	0.199	0.186	0.164	0.194	0.189	0.177	0.185	0.213	0.091	0.089	0.092	0.163	0.192	0.194	0.166	0.18	0.183	0.171	0.191	0.204	0.092
	04:30:09	28.3	0.088	0.09	0.09	0.092	0.09	0.089	0.092	0.088	0.092	0.098	0.094	0.093	0.092	0.204	0.192	0.188	0.2	0.202	0.212	0.224	0.205	0.222	0.098	0.09	0.088	0.166	0.201	0.188	0.166	0.199	0.192	0.178	0.19	0.219	0.091	0.089	0.092	0.167	0.195	0.197	0.17	0.183	0.187	0.162	0.194	0.212	0.092
	04:35:09	28.3	0.088	0.09	0.09	0.092	0.09	0.089	0.092	0.088	0.092	0.098	0.094	0.093	0.092	0.209	0.197	0.192	0.204	0.207	0.219	0.23	0.208	0.223	0.098	0.09	0.088	0.169	0.205	0.191	0.171	0.203	0.196	0.183	0.194	0.223	0.091	0.089	0.092	0.168	0.198	0.2	0.175	0.187	0.188	0.165	0.197	0.213	0.092
	04:40:09	28.3	0.088	0.09	0.09	0.092	0.09	0.089	0.092	0.088	0.092	0.098	0.094	0.093	0.092	0.213	0.202	0.196	0.209	0.213	0.224	0.235	0.213	0.229	0.098	0.09	0.087	0.172	0.207	0.194	0.173	0.207	0.2	0.186	0.199	0.23	0.09	0.089	0.092	0.17	0.201	0.203	0.179	0.19	0.192	0.171	0.203	0.213	0.092
	04:45:09	28.3	0.088	0.09	0.09	0.092	0.09	0.089	0.092	0.088	0.092	0.098	0.094	0.093	0.092	0.218	0.207	0.2	0.216	0.22	0.23	0.242	0.218	0.233	0.098	0.09	0.088	0.175	0.212	0.197	0.177	0.211	0.204	0.19	0.203	0.233	0.091	0.089	0.092	0.171	0.204	0.206	0.183	0.193	0.194	0.176	0.202	0.221	0.092
	04:50:09	28.3	0.088	0.09	0.09	0.092	0.09	0.089	0.092	0.088	0.092	0.098	0.094	0.093	0.092	0.222	0.21	0.203	0.222	0.226	0.238	0.248	0.225	0.241	0.098	0.09	0.088	0.178	0.215	0.201	0.181	0.215	0.21	0.195	0.209	0.242	0.091	0.089	0.092	0.175	0.207	0.21	0.186	0.196	0.199	0.177	0.208	0.227	0.092
	04:55:09	28.3	0.088	0.09	0.09	0.092	0.09	0.089	0.092	0.088	0.092	0.098	0.094	0.093	0.092	0.227	0.216	0.206	0.226	0.231	0.243	0.251	0.229	0.248	0.098	0.09	0.088	0.182	0.218	0.204	0.183	0.219	0.213	0.197	0.213	0.246	0.091	0.089	0.092	0.18	0.211	0.214	0.189	0.2	0.208	0.178	0.21	0.234	0.092
	05:00:09	28.3	0.088	0.09	0.09	0.092	0.09	0.089	0.092	0.088	0.092	0.098	0.094	0.093	0.092	0.234	0.224	0.21	0.231	0.237	0.25	0.257	0.235	0.253	0.098	0.09	0.088	0.185	0.222	0.208	0.187	0.224	0.22	0.201	0.22	0.254	0.091	0.089	0.092	0.185	0.215	0.218	0.192	0.204	0.205	0.181	0.216	0.241	0.092
	05:05:09	28.3	0.088	0.09	0.09	0.092	0.09	0.089	0.092	0.088	0.092	0.098	0.094	0.093	0.092	0.239	0.23	0.216	0.238	0.244	0.256	0.264	0.244	0.262	0.098	0.09	0.088	0.185	0.225	0.212	0.191	0.23	0.225	0.206	0.225	0.261	0.091	0.089	0.092	0.191	0.218	0.223	0.196	0.209	0.213	0.185	0.222	0.248	0.092
	05:10:09	28.3	0.088	0.09	0.09	0.092	0.09	0.089	0.092	0.088	0.092	0.098	0.094	0.093	0.092	0.245	0.233	0.22	0.243	0.248	0.266	0.269	0.25	0.274	0.098	0.09	0.088	0.188	0.232	0.217	0.194	0.234	0.229	0.21	0.23	0.278	0.091	0.089	0.092	0.194	0.222	0.227	0.199	0.212	0.216	0.193	0.222	0.254	0.092
	05:15:09	28.3	0.089	0.09	0.09	0.092	0.09	0.089	0.092	0.088	0.092	0.098	0.094	0.093	0.092	0.253	0.239	0.225	0.249	0.254	0.275	0.276	0.258	0.279	0.098	0.09	0.088	0.192	0.234	0.222	0.197	0.24	0.236	0.213	0.238	0.284	0.091	0.089	0.092	0.198	0.226	0.231	0.202	0.217	0.223	0.183	0.228	0.263	0.092
	05:20:09	28.3	0.088	0.09	0.09	0.092	0.09	0.089	0.092	0.088	0.092	0.098	0.094	0.093	0.092	0.262	0.247	0.229	0.255	0.262	0.283	0.285	0.267	0.291	0.098	0.09	0.088	0.194	0.238	0.226	0.2	0.246	0.243	0.217	0.244	0.294	0.091	0.089	0.092	0.202	0.23	0.236	0.205	0.221	0.229	0.194	0.234	0.271	0.092
	05:25:09	28.3	0.088	0.09	0.09	0.092	0.09	0.089	0.092	0.088	0.092	0.098	0.094	0.093	0.092	0.268	0.253	0.234	0.261	0.27	0.296	0.304	0.275	0.306	0.098	0.09	0.088	0.2	0.244	0.231	0.202	0.254	0.247	0.22	0.251	0.304	0.091	0.089	0.092	0.206	0.234	0.24	0.208	0.224	0.234	0.202	0.236	0.282	0.092
	05:30:09	28.3	0.088	0.09	0.09	0.092	0.09	0.089	0.092	0.088	0.092	0.098	0.094	0.093	0.092	0.276	0.257	0.24	0.268	0.281	0.305	0.309	0.283	0.311	0.098	0.09	0.088	0.204	0.247	0.235	0.205	0.266	0.253	0.223	0.258	0.31	0.091	0.089	0.092	0.21	0.238	0.245	0.21	0.228	0.239	0.203	0.239	0.29	0.092
	05:35:09	28.3	0.088	0.09	0.09	0.092	0.09	0.089	0.092	0.088	0.092	0.098	0.094	0.093	0.092	0.281	0.265	0.247	0.278	0.292	0.312	0.322	0.292	0.321	0.098	0.09	0.088	0.207	0.252	0.24	0.206	0.271	0.264	0.228	0.264	0.319	0.091	0.089	0.092	0.214	0.243	0.251	0.214	0.232	0.247	0.206	0.247	0.3	0.092
	05:40:09	28.3	0.088	0.09	0.09	0.092	0.09	0.089	0.092	0.088	0.092	0.098	0.094	0.093	0.092	0.288	0.274	0.251	0.287	0.305	0.323	0.338	0.302	0.328	0.099	0.09	0.088	0.211	0.256	0.245	0.209	0.275	0.277	0.233	0.27	0.326	0.091	0.089	0.092	0.217	0.247	0.254	0.217	0.237	0.252	0.21	0.26	0.308	0.092
	05:45:09	28.3	0.088	0.09	0.09	0.092	0.09	0.089	0.092	0.088	0.092	0.098	0.094	0.093	0.092	0.299	0.279	0.258	0.296	0.313	0.324	0.355	0.307	0.333	0.098	0.09	0.088	0.216	0.267	0.253	0.212	0.284	0.286	0.236	0.278	0.332	0.091	0.089	0.092	0.221	0.252	0.263	0.219	0.245	0.258	0.214	0.274	0.319	0.092
	05:50:09	28.3	0.088	0.09	0.09	0.092	0.09	0.089	0.092	0.088	0.092	0.097	0.094	0.093	0.092	0.314	0.287	0.268	0.307	0.322	0.336	0.368	0.318	0.342	0.098	0.09	0.088	0.22	0.278	0.256	0.214	0.291	0.293	0.241	0.284	0.34	0.091	0.089	0.092	0.225	0.255	0.267	0.222	0.259	0.265	0.217	0.28	0.327	0.092
	05:55:09	28.3	0.088	0.09	0.09	0.092	0.09	0.089	0.092	0.088	0.092	0.098	0.094	0.093	0.092	0.339	0.295	0.283	0.321	0.332	0.347	0.382	0.331	0.351	0.098	0.09	0.088	0.224	0.278	0.267	0.217	0.297	0.299	0.249	0.294	0.347	0.091	0.089	0.092	0.231	0.263	0.283	0.228	0.264	0.278	0.221	0.287	0.334	0.092
	06:00:09	28.3	0.089	0.09	0.09	0.092	0.09	0.089	0.092	0.088	0.092	0.098	0.094	0.093	0.092	0.381	0.304	0.287	0.337	0.344	0.358	0.394	0.345	0.366	0.098	0.09	0.088	0.228	0.285	0.275	0.224	0.301	0.306	0.254	0.302	0.354	0.091	0.089	0.092	0.237	0.272	0.291	0.234	0.27	0.29	0.226	0.29	0.343	0.092
	06:05:09	28.3	0.089	0.09	0.09	0.092	0.09	0.089	0.092	0.088	0.092	0.098	0.094	0.093	0.092	0.406	0.313	0.297	0.349	0.357	0.371	0.401	0.357	0.375	0.098	0.09	0.088	0.232	0.291	0.283	0.23	0.306	0.309	0.259	0.309	0.362	0.091	0.089	0.092	0.249	0.281	0.301	0.239	0.275	0.294	0.228	0.298	0.351	0.092
	06:10:09	28.3	0.088	0.09	0.09	0.092	0.09	0.089	0.092	0.088	0.092	0.097	0.094	0.093	0.092	0.415	0.324	0.301	0.366	0.371	0.383	0.414	0.379	0.392	0.098	0.09	0.088	0.237	0.301	0.299	0.243	0.314	0.319	0.279	0.313	0.373	0.091	0.089	0.092	0.252	0.289	0.318	0.245	0.283	0.302	0.232	0.301	0.36	0.092
	06:15:09	28.3	0.088	0.09	0.09	0.092	0.09	0.089	0.092	0.088	0.092	0.098	0.094	0.093	0.092	0.418	0.337	0.316	0.382	0.384	0.396	0.436	0.395	0.403	0.098	0.09	0.088	0.243	0.308	0.309	0.242	0.317	0.323	0.28	0.321	0.382	0.091	0.089	0.092	0.255	0.295	0.319	0.254	0.289	0.308	0.236	0.303	0.37	0.092
	06:20:09	28.3	0.088	0.09	0.09	0.092	0.09	0.089	0.092	0.088	0.092	0.097	0.094	0.093	0.092	0.426	0.353	0.319	0.393	0.395	0.402	0.46	0.408	0.416	0.098	0.09	0.087	0.247	0.321	0.317	0.246	0.322	0.327	0.287	0.328	0.392	0.091	0.089	0.092	0.263	0.304	0.329	0.257	0.294	0.317	0.239	0.305	0.383	0.092
	06:25:09	28.3	0.088	0.09	0.09	0.092	0.09	0.089	0.092	0.088	0.092	0.097	0.094	0.093	0.092	0.449	0.379	0.333	0.41	0.417	0.418	0.486	0.431	0.435	0.098	0.09	0.087	0.257	0.325	0.325	0.252	0.329	0.336	0.292	0.334	0.404	0.091	0.089	0.092	0.266	0.305	0.339	0.262	0.301	0.324	0.245	0.309	0.397	0.092
	06:30:09	28.3	0.089	0.09	0.09	0.092	0.09	0.089	0.092	0.088	0.092	0.097	0.094	0.093	0.092	0.469	0.398	0.344	0.422	0.43	0.429	0.51	0.451	0.447	0.098	0.09	0.088	0.268	0.338	0.331	0.259	0.337	0.345	0.296	0.342	0.417	0.091	0.089	0.092	0.276	0.316	0.349	0.268	0.304	0.336	0.254	0.313	0.412	0.092
	06:35:09	28.3	0.088	0.09	0.09	0.092	0.09	0.089	0.092	0.088	0.092	0.097	0.094	0.093	0.092	0.488	0.423	0.359	0.438	0.459	0.443	0.534	0.473	0.468	0.098	0.09	0.088	0.271	0.346	0.343	0.263	0.343	0.353	0.3	0.349	0.431	0.091	0.089	0.092	0.28	0.32	0.36	0.276	0.311	0.342	0.271	0.318	0.432	0.092
	06:40:09	28.3	0.088	0.09	0.09	0.092	0.09	0.089	0.092	0.088	0.092	0.097	0.094	0.093	0.092	0.515	0.445	0.371	0.458	0.486	0.463	0.566	0.501	0.491	0.098	0.09	0.088	0.275	0.353	0.355	0.268	0.35	0.366	0.306	0.357	0.443	0.091	0.089	0.092	0.289	0.327	0.369	0.282	0.317	0.351	0.274	0.323	0.46	0.092
	06:45:09	28.3	0.088	0.09	0.09	0.092	0.09	0.089	0.092	0.088	0.092	0.097	0.094	0.093	0.092	0.548	0.47	0.384	0.477	0.516	0.486	0.61	0.533	0.512	0.098	0.09	0.088	0.288	0.363	0.364	0.272	0.355	0.376	0.312	0.367	0.456	0.091	0.089	0.092	0.287	0.334	0.38	0.284	0.322	0.358	0.28	0.328	0.499	0.092
	06:50:09	28.3	0.088	0.09	0.09	0.092	0.09	0.089	0.092	0.088	0.092	0.097	0.094	0.093	0.092	0.584	0.498	0.4	0.494	0.534	0.509	0.661	0.561	0.528	0.098	0.09	0.088	0.305	0.372	0.374	0.275	0.358	0.382	0.314	0.374	0.469	0.091	0.089	0.092	0.302	0.344	0.389	0.285	0.325	0.371	0.286	0.331	0.532	0.092
	06:55:09	28.3	0.088	0.09	0.09	0.092	0.09	0.089	0.092	0.088	0.092	0.097	0.094	0.093	0.092	0.632	0.532	0.409	0.516	0.561	0.531	0.672	0.613	0.556	0.098	0.09	0.088	0.303	0.378	0.387	0.278	0.369	0.397	0.319	0.383	0.506	0.091	0.089	0.092	0.296	0.347	0.4	0.288	0.332	0.379	0.291	0.335	0.558	0.092
	07:00:09	28.3	0.088	0.09	0.09	0.092	0.09	0.089	0.092	0.088	0.092	0.097	0.094	0.093	0.092	0.662	0.566	0.421	0.538	0.577	0.55	0.681	0.66	0.573	0.098	0.09	0.088	0.318	0.385	0.398	0.284	0.378	0.407	0.32	0.396	0.519	0.091	0.089	0.092	0.316	0.354	0.408	0.299	0.336	0.388	0.292	0.341	0.593	0.092
	07:05:09	28.3	0.088	0.09	0.09	0.092	0.09	0.089	0.092	0.088	0.092	0.097	0.094	0.093	0.092	0.691	0.592	0.433	0.554	0.597	0.564	0.696	0.681	0.59	0.098	0.09	0.088	0.322	0.392	0.405	0.287	0.387	0.417	0.324	0.403	0.533	0.09	0.089	0.092	0.301	0.357	0.415	0.302	0.34	0.398	0.298	0.344	0.606	0.091
	07:10:09	28.3	0.088	0.09	0.09	0.092	0.09	0.089	0.092	0.088	0.092	0.097	0.094	0.093	0.092	0.681	0.619	0.439	0.574	0.636	0.583	0.686	0.686	0.614	0.098	0.09	0.088	0.324	0.395	0.41	0.291	0.396	0.425	0.33	0.404	0.548	0.091	0.089	0.092	0.315	0.363	0.419	0.303	0.344	0.41	0.305	0.35	0.617	0.092
	07:15:09	28.3	0.089	0.09	0.09	0.092	0.09	0.089	0.092	0.088	0.092	0.097	0.094	0.093	0.092	0.682	0.665	0.452	0.605	0.68	0.603	0.687	0.7	0.659	0.098	0.09	0.088	0.333	0.403	0.418	0.297	0.408	0.439	0.334	0.417	0.577	0.091	0.089	0.092	0.319	0.371	0.426	0.311	0.35	0.422	0.309	0.358	0.647	0.092
	07:20:09	28.3	0.088	0.09	0.09	0.092	0.09	0.089	0.092	0.088	0.092	0.097	0.094	0.093	0.092	0.649	0.681	0.471	0.643	0.713	0.622	0.686	0.695	0.69	0.098	0.09	0.088	0.344	0.409	0.426	0.303	0.414	0.452	0.341	0.419	0.592	0.091	0.089	0.092	0.334	0.386	0.438	0.317	0.361	0.435	0.315	0.363	0.657	0.092
	07:25:09	28.3	0.089	0.09	0.09	0.092	0.09	0.089	0.092	0.088	0.092	0.097	0.094	0.093	0.092	0.648	0.684	0.493	0.672	0.728	0.639	0.689	0.691	0.697	0.098	0.09	0.087	0.35	0.414	0.435	0.305	0.426	0.466	0.344	0.426	0.626	0.091	0.089	0.092	0.335	0.391	0.445	0.32	0.364	0.448	0.318	0.37	0.679	0.092
	07:30:09	28.3	0.089	0.09	0.09	0.092	0.09	0.089	0.092	0.088	0.092	0.097	0.094	0.093	0.092	0.649	0.672	0.502	0.724	0.71	0.672	0.69	0.69	0.699	0.098	0.09	0.088	0.354	0.425	0.444	0.306	0.438	0.479	0.347	0.436	0.655	0.091	0.089	0.092	0.344	0.397	0.455	0.324	0.37	0.46	0.322	0.378	0.703	0.092
	07:35:09	28.3	0.088	0.09	0.09	0.092	0.09	0.089	0.092	0.088	0.092	0.097	0.094	0.093	0.092	0.657	0.68	0.519	0.699	0.723	0.702	0.69	0.683	0.7	0.098	0.09	0.088	0.361	0.431	0.456	0.311	0.447	0.496	0.352	0.445	0.661	0.091	0.089	0.092	0.353	0.405	0.466	0.327	0.379	0.478	0.321	0.385	0.755	0.091
	07:40:09	28.3	0.088	0.09	0.089	0.092	0.09	0.089	0.092	0.088	0.092	0.097	0.093	0.093	0.092	0.652	0.666	0.542	0.7	0.706	0.715	0.695	0.687	0.697	0.098	0.09	0.087	0.357	0.438	0.473	0.316	0.462	0.518	0.356	0.452	0.699	0.09	0.089	0.092	0.355	0.408	0.48	0.331	0.384	0.496	0.322	0.393	0.783	0.091
	07:45:09	28.3	0.088	0.09	0.09	0.092	0.09	0.089	0.092	0.088	0.092	0.097	0.094	0.093	0.092	0.662	0.665	0.567	0.683	0.699	0.728	0.694	0.688	0.695	0.098	0.09	0.088	0.373	0.445	0.477	0.317	0.471	0.535	0.358	0.466	0.745	0.09	0.089	0.092	0.365	0.417	0.493	0.334	0.392	0.515	0.333	0.405	0.792	0.091
	07:50:09	28.3	0.088	0.09	0.09	0.092	0.09	0.089	0.092	0.088	0.092	0.097	0.093	0.093	0.092	0.667	0.662	0.591	0.686	0.702	0.727	0.694	0.691	0.702	0.098	0.09	0.087	0.372	0.455	0.496	0.324	0.491	0.559	0.367	0.481	0.741	0.091	0.089	0.092	0.374	0.427	0.509	0.338	0.402	0.536	0.338	0.416	0.789	0.091
	07:55:09	28.3	0.089	0.09	0.09	0.092	0.09	0.089	0.092	0.088	0.092	0.097	0.093	0.093	0.092	0.67	0.665	0.626	0.688	0.705	0.725	0.697	0.692	0.712	0.098	0.09	0.088	0.362	0.469	0.517	0.329	0.504	0.583	0.373	0.499	0.752	0.091	0.089	0.092	0.379	0.434	0.524	0.34	0.409	0.56	0.333	0.427	0.791	0.092
	08:00:09	28.3	0.088	0.09	0.09	0.092	0.09	0.089	0.092	0.088	0.092	0.097	0.093	0.093	0.092	0.668	0.667	0.645	0.686	0.703	0.72	0.697	0.694	0.709	0.098	0.09	0.088	0.378	0.478	0.532	0.33	0.524	0.6	0.373	0.517	0.726	0.091	0.089	0.092	0.386	0.443	0.54	0.342	0.418	0.571	0.331	0.436	0.771	0.092
	08:05:09	28.3	0.089	0.09	0.09	0.092	0.09	0.089	0.092	0.088	0.092	0.097	0.093	0.093	0.092	0.671	0.668	0.664	0.68	0.702	0.724	0.698	0.694	0.713	0.098	0.09	0.088	0.387	0.494	0.548	0.332	0.542	0.613	0.377	0.527	0.715	0.091	0.089	0.092	0.391	0.452	0.56	0.346	0.425	0.587	0.338	0.45	0.759	0.092
	08:10:09	28.3	0.088	0.09	0.09	0.092	0.089	0.089	0.092	0.088	0.092	0.097	0.093	0.093	0.092	0.669	0.668	0.693	0.679	0.702	0.726	0.699	0.696	0.715	0.098	0.09	0.087	0.406	0.503	0.564	0.334	0.558	0.626	0.385	0.541	0.727	0.09	0.089	0.092	0.39	0.458	0.572	0.351	0.435	0.601	0.349	0.464	0.75	0.091
	08:15:09	28.3	0.089	0.09	0.09	0.092	0.09	0.089	0.092	0.088	0.091	0.097	0.093	0.093	0.092	0.67	0.669	0.698	0.682	0.702	0.724	0.7	0.696	0.716	0.098	0.09	0.088	0.407	0.508	0.587	0.341	0.575	0.634	0.388	0.554	0.727	0.09	0.089	0.092	0.399	0.468	0.594	0.353	0.447	0.612	0.357	0.477	0.746	0.091
	08:20:09	28.3	0.088	0.09	0.09	0.092	0.09	0.089	0.092	0.088	0.091	0.097	0.093	0.093	0.092	0.671	0.672	0.696	0.682	0.705	0.729	0.699	0.698	0.721	0.098	0.09	0.087	0.405	0.523	0.607	0.348	0.605	0.655	0.393	0.57	0.734	0.09	0.089	0.092	0.405	0.478	0.605	0.358	0.458	0.628	0.357	0.49	0.75	0.091
	08:25:09	28.3	0.088	0.09	0.09	0.092	0.09	0.089	0.092	0.088	0.092	0.097	0.093	0.093	0.092	0.672	0.671	0.683	0.684	0.705	0.732	0.703	0.699	0.722	0.098	0.09	0.088	0.406	0.535	0.63	0.349	0.617	0.672	0.398	0.568	0.74	0.091	0.089	0.092	0.413	0.488	0.641	0.363	0.466	0.643	0.357	0.512	0.747	0.092
	08:30:09	28.3	0.088	0.09	0.089	0.092	0.089	0.089	0.092	0.088	0.091	0.097	0.093	0.093	0.092	0.669	0.671	0.685	0.682	0.704	0.735	0.703	0.7	0.724	0.098	0.09	0.087	0.414	0.552	0.644	0.349	0.631	0.694	0.405	0.57	0.739	0.09	0.089	0.092	0.419	0.498	0.642	0.366	0.475	0.662	0.357	0.526	0.755	0.091
	08:35:09	28.3	0.088	0.09	0.089	0.092	0.09	0.089	0.092	0.088	0.091	0.097	0.093	0.093	0.092	0.671	0.672	0.691	0.683	0.706	0.735	0.705	0.702	0.733	0.098	0.09	0.088	0.428	0.569	0.663	0.354	0.65	0.718	0.41	0.58	0.745	0.09	0.089	0.092	0.428	0.51	0.658	0.368	0.486	0.672	0.365	0.543	0.751	0.091
	08:40:09	28.3	0.088	0.09	0.089	0.092	0.09	0.089	0.092	0.088	0.092	0.097	0.093	0.093	0.092	0.67	0.672	0.679	0.685	0.706	0.741	0.703	0.701	0.735	0.098	0.09	0.087	0.431	0.588	0.668	0.356	0.66	0.727	0.418	0.586	0.748	0.09	0.089	0.092	0.43	0.522	0.668	0.371	0.495	0.69	0.366	0.557	0.754	0.091
	08:45:09	28.3	0.088	0.09	0.089	0.092	0.09	0.089	0.092	0.088	0.091	0.097	0.093	0.093	0.092	0.672	0.671	0.691	0.685	0.706	0.739	0.705	0.702	0.737	0.098	0.09	0.087	0.451	0.604	0.664	0.357	0.675	0.72	0.421	0.588	0.75	0.09	0.089	0.092	0.436	0.537	0.669	0.376	0.508	0.696	0.371	0.575	0.755	0.091
	08:50:09	28.3	0.088	0.09	0.089	0.092	0.09	0.089	0.092	0.088	0.091	0.097	0.093	0.093	0.092	0.673	0.674	0.695	0.685	0.706	0.741	0.706	0.706	0.741	0.098	0.09	0.088	0.461	0.615	0.667	0.362	0.696	0.74	0.43	0.59	0.754	0.09	0.089	0.092	0.445	0.56	0.679	0.38	0.529	0.711	0.376	0.589	0.761	0.091
	08:55:09	28.3	0.088	0.09	0.089	0.092	0.09	0.089	0.092	0.088	0.091	0.097	0.093	0.093	0.092	0.673	0.673	0.691	0.684	0.707	0.741	0.706	0.703	0.74	0.098	0.09	0.088	0.452	0.635	0.654	0.368	0.704	0.731	0.435	0.595	0.754	0.09	0.089	0.092	0.458	0.571	0.678	0.385	0.545	0.703	0.386	0.599	0.758	0.091
	09:00:09	28.3	0.088	0.09	0.089	0.092	0.09	0.089	0.092	0.088	0.091	0.097	0.093	0.093	0.092	0.673	0.671	0.697	0.688	0.707	0.743	0.706	0.707	0.745	0.098	0.09	0.087	0.469	0.658	0.667	0.371	0.717	0.725	0.444	0.602	0.759	0.09	0.089	0.092	0.471	0.587	0.68	0.389	0.559	0.714	0.382	0.61	0.766	0.091
	09:05:09	28.3	0.088	0.09	0.09	0.092	0.09	0.089	0.092	0.088	0.091	0.097	0.093	0.093	0.092	0.672	0.671	0.697	0.687	0.706	0.741	0.703	0.706	0.744	0.098	0.09	0.087	0.482	0.676	0.67	0.375	0.73	0.727	0.453	0.605	0.76	0.09	0.089	0.092	0.482	0.608	0.683	0.393	0.574	0.716	0.389	0.622	0.764	0.091
	09:10:09	28.3	0.089	0.09	0.09	0.092	0.09	0.089	0.092	0.088	0.091	0.097	0.093	0.093	0.092	0.669	0.67	0.694	0.686	0.705	0.741	0.701	0.706	0.745	0.098	0.09	0.087	0.489	0.665	0.667	0.38	0.747	0.726	0.462	0.609	0.762	0.09	0.089	0.092	0.495	0.628	0.673	0.396	0.584	0.72	0.387	0.631	0.766	0.091
	09:15:09	28.3	0.088	0.09	0.089	0.092	0.09	0.089	0.092	0.088	0.091	0.097	0.093	0.093	0.092	0.671	0.668	0.696	0.688	0.705	0.74	0.702	0.707	0.747	0.098	0.09	0.087	0.498	0.676	0.665	0.384	0.763	0.733	0.472	0.615	0.762	0.09	0.089	0.092	0.504	0.633	0.683	0.4	0.601	0.723	0.396	0.644	0.768	0.091
	09:20:09	28.3	0.088	0.09	0.089	0.092	0.09	0.089	0.092	0.088	0.091	0.097	0.093	0.093	0.092	0.674	0.672	0.699	0.686	0.704	0.738	0.702	0.705	0.747	0.098	0.09	0.087	0.513	0.67	0.669	0.388	0.775	0.737	0.483	0.616	0.765	0.09	0.089	0.092	0.513	0.65	0.689	0.408	0.62	0.721	0.402	0.663	0.768	0.091
	09:25:09	28.3	0.088	0.09	0.09	0.092	0.089	0.089	0.092	0.088	0.091	0.097	0.093	0.093	0.092	0.673	0.667	0.694	0.685	0.705	0.739	0.698	0.703	0.747	0.098	0.09	0.087	0.518	0.671	0.671	0.392	0.783	0.741	0.491	0.621	0.763	0.09	0.089	0.092	0.528	0.656	0.692	0.413	0.626	0.725	0.407	0.678	0.766	0.091
	09:30:09	28.3	0.088	0.09	0.089	0.092	0.09	0.089	0.092	0.088	0.091	0.097	0.093	0.093	0.092	0.674	0.654	0.698	0.686	0.704	0.738	0.697	0.703	0.747	0.098	0.09	0.087	0.527	0.672	0.67	0.397	0.785	0.744	0.499	0.624	0.764	0.091	0.089	0.092	0.532	0.658	0.69	0.416	0.641	0.727	0.413	0.696	0.765	0.091
	09:35:09	28.3	0.088	0.09	0.09	0.092	0.09	0.089	0.092	0.088	0.091	0.097	0.093	0.093	0.092	0.674	0.663	0.698	0.683	0.702	0.735	0.702	0.702	0.747	0.098	0.09	0.087	0.535	0.681	0.675	0.398	0.783	0.744	0.505	0.624	0.763	0.09	0.089	0.092	0.544	0.656	0.693	0.419	0.653	0.726	0.416	0.706	0.762	0.091
	09:40:09	28.3	0.088	0.09	0.09	0.092	0.09	0.089	0.092	0.088	0.091	0.097	0.093	0.093	0.092	0.672	0.665	0.695	0.681	0.701	0.735	0.704	0.702	0.747	0.098	0.09	0.087	0.548	0.674	0.671	0.405	0.783	0.746	0.518	0.63	0.764	0.09	0.089	0.092	0.559	0.656	0.693	0.424	0.667	0.728	0.422	0.714	0.764	0.091
	09:45:09	28.3	0.088	0.09	0.09	0.092	0.09	0.089	0.092	0.088	0.091	0.097	0.093	0.093	0.092	0.67	0.669	0.698	0.68	0.704	0.736	0.698	0.702	0.75	0.098	0.09	0.087	0.565	0.677	0.67	0.411	0.785	0.75	0.542	0.635	0.765	0.091	0.089	0.092	0.577	0.663	0.694	0.43	0.689	0.728	0.431	0.72	0.764	0.091
	09:50:09	28.3	0.088	0.09	0.089	0.092	0.09	0.089	0.092	0.088	0.091	0.097	0.093	0.093	0.092	0.667	0.666	0.696	0.679	0.7	0.733	0.695	0.699	0.747	0.098	0.09	0.087	0.574	0.68	0.673	0.416	0.78	0.747	0.543	0.635	0.764	0.09	0.089	0.092	0.582	0.662	0.695	0.434	0.689	0.73	0.437	0.725	0.763	0.091
	09:55:09	28.3	0.088	0.09	0.089	0.092	0.09	0.089	0.092	0.088	0.091	0.097	0.093	0.093	0.092	0.674	0.663	0.693	0.677	0.698	0.732	0.696	0.701	0.747	0.098	0.09	0.087	0.582	0.689	0.672	0.416	0.781	0.748	0.552	0.636	0.762	0.09	0.089	0.092	0.594	0.667	0.697	0.439	0.699	0.729	0.449	0.729	0.76	0.091
	10:00:09	28.3	0.089	0.09	0.09	0.092	0.09	0.089	0.092	0.088	0.091	0.097	0.093	0.093	0.092	0.675	0.661	0.696	0.675	0.695	0.73	0.696	0.698	0.746	0.098	0.09	0.087	0.591	0.688	0.672	0.423	0.782	0.747	0.56	0.639	0.763	0.091	0.089	0.092	0.604	0.668	0.697	0.443	0.706	0.727	0.452	0.729	0.762	0.091
	10:05:09	28.3	0.088	0.09	0.09	0.092	0.089	0.089	0.092	0.088	0.091	0.097	0.093	0.093	0.092	0.673	0.661	0.698	0.673	0.698	0.728	0.699	0.699	0.744	0.098	0.09	0.087	0.603	0.692	0.67	0.431	0.784	0.75	0.57	0.643	0.761	0.09	0.089	0.092	0.617	0.669	0.691	0.449	0.724	0.727	0.46	0.733	0.761	0.091
	10:10:09	28.3	0.088	0.09	0.09	0.092	0.09	0.089	0.092	0.088	0.091	0.097	0.093	0.093	0.092	0.674	0.663	0.692	0.674	0.697	0.727	0.695	0.702	0.744	0.098	0.09	0.087	0.61	0.69	0.668	0.433	0.787	0.749	0.584	0.644	0.76	0.091	0.089	0.092	0.627	0.672	0.695	0.455	0.744	0.726	0.472	0.735	0.761	0.091
	10:15:09	28.3	0.088	0.09	0.09	0.092	0.09	0.089	0.092	0.088	0.091	0.097	0.093	0.093	0.092	0.676	0.665	0.696	0.674	0.697	0.729	0.7	0.701	0.744	0.098	0.09	0.087	0.615	0.69	0.674	0.439	0.786	0.748	0.595	0.642	0.76	0.09	0.089	0.092	0.637	0.671	0.691	0.461	0.747	0.728	0.478	0.734	0.759	0.091
	10:20:09	28.3	0.088	0.09	0.09	0.092	0.09	0.089	0.092	0.088	0.091	0.097	0.093	0.093	0.092	0.678	0.668	0.695	0.675	0.696	0.728	0.701	0.699	0.744	0.098	0.09	0.087	0.63	0.688	0.668	0.445	0.786	0.746	0.607	0.648	0.76	0.091	0.089	0.092	0.642	0.671	0.691	0.467	0.747	0.726	0.486	0.738	0.761	0.091
	10:25:09	28.3	0.088	0.09	0.09	0.092	0.09	0.089	0.092	0.088	0.091	0.097	0.093	0.093	0.092	0.676	0.668	0.7	0.676	0.696	0.729	0.702	0.7	0.742	0.098	0.09	0.087	0.638	0.69	0.672	0.451	0.788	0.748	0.612	0.643	0.761	0.09	0.089	0.092	0.66	0.669	0.691	0.474	0.748	0.724	0.491	0.746	0.762	0.091
	10:30:09	28.3	0.089	0.09	0.09	0.092	0.09	0.089	0.092	0.088	0.091	0.097	0.093	0.093	0.092	0.678	0.669	0.694	0.676	0.692	0.727	0.699	0.697	0.742	0.098	0.09	0.088	0.654	0.69	0.674	0.456	0.786	0.746	0.614	0.647	0.76	0.091	0.089	0.092	0.659	0.67	0.691	0.478	0.749	0.721	0.497	0.749	0.759	0.091
	10:35:09	28.3	0.088	0.09	0.09	0.092	0.089	0.089	0.092	0.088	0.091	0.097	0.093	0.093	0.092	0.676	0.662	0.69	0.671	0.689	0.722	0.698	0.696	0.739	0.098	0.09	0.087	0.658	0.688	0.671	0.466	0.786	0.745	0.621	0.645	0.759	0.09	0.089	0.092	0.668	0.671	0.688	0.484	0.752	0.722	0.515	0.752	0.755	0.091
	10:40:09	28.3	0.088	0.09	0.09	0.092	0.09	0.089	0.092	0.088	0.091	0.097	0.093	0.093	0.092	0.678	0.658	0.692	0.67	0.689	0.721	0.698	0.7	0.74	0.098	0.09	0.087	0.674	0.692	0.664	0.473	0.786	0.745	0.632	0.648	0.758	0.09	0.089	0.092	0.672	0.669	0.688	0.493	0.754	0.723	0.529	0.754	0.754	0.091
	10:45:09	28.3	0.088	0.09	0.09	0.092	0.09	0.089	0.092	0.088	0.091	0.097	0.093	0.093	0.092	0.677	0.657	0.691	0.673	0.688	0.722	0.698	0.696	0.74	0.098	0.09	0.087	0.691	0.685	0.668	0.483	0.785	0.743	0.645	0.649	0.756	0.09	0.089	0.092	0.681	0.672	0.688	0.503	0.753	0.72	0.542	0.754	0.757	0.091
	10:50:09	28.3	0.088	0.09	0.089	0.092	0.089	0.089	0.092	0.088	0.091	0.097	0.093	0.093	0.092	0.674	0.661	0.686	0.675	0.687	0.717	0.696	0.695	0.739	0.098	0.09	0.087	0.672	0.689	0.665	0.488	0.784	0.739	0.656	0.649	0.753	0.09	0.089	0.092	0.697	0.672	0.687	0.507	0.754	0.724	0.548	0.754	0.757	0.091
	10:55:08	28.3	0.088	0.09	0.09	0.092	0.09	0.089	0.092	0.088	0.091	0.097	0.093	0.093	0.092	0.672	0.665	0.692	0.673	0.681	0.718	0.696	0.692	0.739	0.098	0.09	0.087	0.693	0.689	0.66	0.497	0.781	0.738	0.658	0.65	0.754	0.09	0.089	0.092	0.689	0.668	0.687	0.511	0.754	0.717	0.557	0.757	0.757	0.091
	11:00:09	28.3	0.088	0.09	0.09	0.092	0.09	0.089	0.092	0.088	0.091	0.097	0.093	0.093	0.092	0.672	0.664	0.691	0.675	0.683	0.716	0.695	0.694	0.739	0.098	0.09	0.087	0.669	0.687	0.661	0.498	0.782	0.739	0.67	0.653	0.755	0.09	0.089	0.092	0.689	0.672	0.687	0.517	0.755	0.716	0.571	0.758	0.756	0.091
	11:05:09	28.3	0.088	0.09	0.089	0.092	0.089	0.089	0.092	0.088	0.091	0.097	0.093	0.093	0.092	0.672	0.666	0.692	0.674	0.684	0.72	0.698	0.695	0.742	0.098	0.09	0.087	0.683	0.68	0.663	0.508	0.78	0.741	0.673	0.655	0.757	0.091	0.089	0.092	0.681	0.669	0.687	0.522	0.757	0.721	0.58	0.76	0.755	0.091
	11:10:09	28.3	0.088	0.09	0.09	0.092	0.09	0.089	0.092	0.088	0.091	0.097	0.093	0.093	0.092	0.673	0.663	0.696	0.671	0.683	0.717	0.699	0.693	0.735	0.098	0.09	0.087	0.686	0.686	0.671	0.508	0.778	0.738	0.676	0.654	0.759	0.09	0.089	0.092	0.674	0.669	0.689	0.529	0.757	0.717	0.592	0.76	0.752	0.091
	11:15:09	28.3	0.088	0.09	0.089	0.092	0.09	0.089	0.092	0.088	0.091	0.097	0.093	0.093	0.092	0.674	0.665	0.691	0.671	0.678	0.715	0.701	0.691	0.733	0.098	0.09	0.087	0.686	0.68	0.67	0.513	0.776	0.735	0.68	0.655	0.754	0.09	0.089	0.092	0.698	0.667	0.684	0.533	0.756	0.72	0.604	0.761	0.75	0.091
	11:20:09	28.3	0.088	0.09	0.09	0.092	0.09	0.089	0.092	0.088	0.091	0.097	0.093	0.093	0.092	0.674	0.663	0.683	0.667	0.675	0.717	0.696	0.689	0.734	0.098	0.09	0.088	0.679	0.679	0.676	0.519	0.776	0.734	0.692	0.655	0.754	0.09	0.089	0.092	0.698	0.662	0.681	0.541	0.757	0.716	0.612	0.761	0.75	0.091
	11:25:09	28.3	0.089	0.09	0.09	0.092	0.09	0.089	0.092	0.088	0.091	0.097	0.093	0.093	0.092	0.674	0.661	0.683	0.663	0.679	0.717	0.698	0.69	0.736	0.098	0.09	0.088	0.679	0.681	0.672	0.524	0.772	0.733	0.699	0.654	0.754	0.091	0.089	0.092	0.696	0.663	0.685	0.547	0.756	0.717	0.625	0.762	0.746	0.091
	11:30:09	28.3	0.088	0.09	0.09	0.092	0.09	0.089	0.092	0.088	0.091	0.097	0.093	0.093	0.092	0.676	0.658	0.686	0.664	0.677	0.716	0.698	0.691	0.733	0.098	0.09	0.087	0.689	0.681	0.671	0.532	0.771	0.73	0.708	0.654	0.753	0.09	0.089	0.092	0.699	0.66	0.683	0.555	0.756	0.715	0.632	0.759	0.744	0.091
	11:35:09	28.3	0.088	0.09	0.09	0.092	0.09	0.089	0.092	0.088	0.091	0.097	0.093	0.093	0.092	0.674	0.656	0.69	0.663	0.679	0.714	0.699	0.693	0.734	0.098	0.09	0.087	0.69	0.678	0.671	0.537	0.769	0.728	0.719	0.653	0.755	0.091	0.089	0.092	0.703	0.658	0.684	0.565	0.756	0.715	0.638	0.761	0.745	0.091
	11:40:09	28.3	0.088	0.09	0.09	0.092	0.089	0.089	0.092	0.088	0.091	0.097	0.093	0.093	0.092	0.673	0.661	0.685	0.664	0.671	0.713	0.698	0.695	0.73	0.097	0.09	0.087	0.685	0.674	0.67	0.54	0.766	0.729	0.725	0.658	0.755	0.09	0.089	0.092	0.701	0.66	0.681	0.572	0.754	0.713	0.644	0.761	0.744	0.091
	11:45:09	28.3	0.088	0.09	0.09	0.092	0.09	0.089	0.092	0.088	0.091	0.096	0.092	0.093	0.092	0.674	0.663	0.682	0.665	0.67	0.708	0.7	0.692	0.729	0.097	0.09	0.087	0.682	0.677	0.67	0.546	0.762	0.727	0.729	0.661	0.752	0.09	0.089	0.092	0.702	0.658	0.679	0.578	0.752	0.711	0.655	0.76	0.741	0.091
	11:50:09	28.3	0.089	0.09	0.09	0.092	0.089	0.089	0.092	0.088	0.091	0.096	0.093	0.093	0.092	0.673	0.667	0.682	0.663	0.671	0.709	0.698	0.695	0.727	0.098	0.09	0.087	0.685	0.677	0.669	0.55	0.762	0.727	0.734	0.661	0.752	0.09	0.089	0.092	0.706	0.66	0.68	0.583	0.752	0.706	0.664	0.759	0.739	0.091
	11:55:09	28.3	0.088	0.09	0.09	0.092	0.089	0.089	0.092	0.088	0.091	0.096	0.092	0.093	0.092	0.672	0.665	0.69	0.665	0.68	0.709	0.698	0.698	0.733	0.097	0.09	0.087	0.686	0.678	0.667	0.555	0.761	0.727	0.739	0.658	0.752	0.09	0.089	0.092	0.709	0.661	0.681	0.592	0.753	0.709	0.669	0.76	0.74	0.091
	12:00:09	28.3	0.088	0.09	0.09	0.092	0.09	0.089	0.092	0.088	0.091	0.096	0.092	0.093	0.092	0.672	0.668	0.692	0.665	0.668	0.709	0.698	0.695	0.734	0.098	0.09	0.088	0.685	0.684	0.665	0.561	0.76	0.726	0.744	0.652	0.752	0.091	0.089	0.092	0.711	0.662	0.68	0.599	0.75	0.712	0.676	0.76	0.742	0.091
	12:05:09	28.3	0.088	0.09	0.089	0.092	0.089	0.089	0.092	0.088	0.091	0.096	0.092	0.093	0.092	0.675	0.669	0.69	0.668	0.675	0.71	0.7	0.692	0.731	0.097	0.09	0.087	0.694	0.682	0.668	0.569	0.756	0.725	0.741	0.657	0.751	0.09	0.088	0.092	0.71	0.66	0.679	0.609	0.75	0.71	0.681	0.761	0.745	0.091
	12:10:09	28.3	0.088	0.09	0.09	0.092	0.09	0.089	0.092	0.088	0.091	0.097	0.093	0.093	0.092	0.674	0.667	0.685	0.664	0.669	0.702	0.699	0.69	0.728	0.097	0.09	0.088	0.699	0.676	0.667	0.574	0.754	0.726	0.742	0.657	0.749	0.09	0.089	0.092	0.709	0.66	0.678	0.615	0.748	0.702	0.687	0.758	0.74	0.091
	12:15:09	28.3	0.088	0.09	0.09	0.092	0.089	0.089	0.092	0.088	0.091	0.096	0.092	0.093	0.092	0.673	0.669	0.686	0.665	0.67	0.705	0.7	0.693	0.729	0.098	0.09	0.087	0.692	0.673	0.665	0.578	0.753	0.723	0.745	0.661	0.751	0.09	0.089	0.092	0.709	0.658	0.679	0.622	0.746	0.704	0.694	0.759	0.735	0.091
	12:20:09	28.3	0.088	0.09	0.09	0.092	0.09	0.089	0.092	0.088	0.091	0.096	0.092	0.093	0.092	0.673	0.668	0.686	0.666	0.671	0.702	0.702	0.696	0.724	0.097	0.09	0.087	0.698	0.673	0.668	0.583	0.753	0.722	0.753	0.663	0.754	0.091	0.089	0.092	0.713	0.658	0.676	0.625	0.746	0.707	0.7	0.759	0.734	0.091
	12:25:09	28.3	0.088	0.09	0.09	0.092	0.09	0.089	0.092	0.088	0.091	0.096	0.093	0.093	0.092	0.675	0.664	0.688	0.665	0.673	0.705	0.701	0.693	0.727	0.097	0.09	0.087	0.697	0.675	0.672	0.59	0.75	0.724	0.754	0.658	0.752	0.091	0.089	0.092	0.714	0.661	0.679	0.631	0.743	0.702	0.704	0.758	0.733	0.091
	12:30:09	28.3	0.088	0.09	0.089	0.092	0.09	0.089	0.092	0.088	0.091	0.096	0.092	0.093	0.092	0.676	0.663	0.684	0.666	0.669	0.705	0.702	0.691	0.726	0.097	0.09	0.087	0.696	0.673	0.668	0.593	0.747	0.722	0.758	0.662	0.751	0.09	0.089	0.092	0.718	0.662	0.678	0.636	0.74	0.696	0.709	0.756	0.733	0.091
	12:35:09	28.3	0.088	0.09	0.09	0.092	0.089	0.089	0.092	0.088	0.091	0.096	0.092	0.093	0.092	0.675	0.664	0.679	0.666	0.669	0.701	0.703	0.691	0.725	0.097	0.09	0.087	0.687	0.677	0.665	0.599	0.744	0.721	0.759	0.663	0.75	0.09	0.089	0.092	0.715	0.659	0.677	0.643	0.739	0.699	0.719	0.756	0.734	0.091
	12:40:09	28.3	0.089	0.09	0.09	0.092	0.089	0.089	0.092	0.088	0.091	0.096	0.092	0.093	0.092	0.674	0.665	0.683	0.667	0.67	0.701	0.704	0.692	0.728	0.098	0.09	0.087	0.689	0.68	0.665	0.601	0.741	0.723	0.76	0.662	0.751	0.09	0.089	0.092	0.712	0.661	0.678	0.649	0.735	0.701	0.722	0.755	0.735	0.091
	12:45:09	28.3	0.088	0.09	0.09	0.092	0.089	0.089	0.092	0.088	0.091	0.096	0.092	0.093	0.092	0.674	0.664	0.688	0.669	0.672	0.701	0.705	0.693	0.725	0.097	0.09	0.087	0.691	0.676	0.664	0.607	0.744	0.722	0.763	0.663	0.753	0.09	0.089	0.092	0.712	0.66	0.677	0.655	0.735	0.695	0.727	0.754	0.732	0.091
	12:50:09	28.3	0.088	0.09	0.09	0.092	0.09	0.089	0.092	0.088	0.091	0.096	0.092	0.093	0.092	0.677	0.664	0.687	0.668	0.672	0.702	0.705	0.695	0.724	0.098	0.09	0.087	0.694	0.674	0.665	0.612	0.745	0.725	0.766	0.663	0.753	0.09	0.089	0.092	0.711	0.663	0.679	0.666	0.732	0.699	0.733	0.754	0.73	0.091
	12:55:09	28.3	0.088	0.09	0.09	0.092	0.089	0.089	0.092	0.088	0.091	0.096	0.092	0.093	0.091	0.677	0.664	0.688	0.67	0.674	0.699	0.708	0.696	0.722	0.097	0.09	0.087	0.694	0.674	0.665	0.616	0.745	0.723	0.767	0.661	0.754	0.09	0.089	0.092	0.713	0.661	0.68	0.672	0.735	0.697	0.736	0.756	0.73	0.091
	13:00:09	28.3	0.088	0.09	0.09	0.092	0.089	0.089	0.092	0.088	0.091	0.096	0.092	0.093	0.092	0.678	0.666	0.686	0.671	0.673	0.702	0.709	0.697	0.728	0.097	0.09	0.087	0.692	0.675	0.666	0.621	0.743	0.725	0.771	0.663	0.753	0.09	0.089	0.092	0.712	0.66	0.681	0.675	0.736	0.696	0.741	0.751	0.732	0.091
	13:05:09	28.3	0.088	0.09	0.09	0.092	0.089	0.089	0.092	0.088	0.091	0.096	0.092	0.093	0.092	0.676	0.667	0.689	0.671	0.675	0.703	0.708	0.7	0.724	0.097	0.09	0.087	0.687	0.672	0.662	0.629	0.744	0.721	0.771	0.666	0.753	0.09	0.088	0.092	0.712	0.66	0.681	0.685	0.734	0.696	0.744	0.755	0.728	0.091
	13:10:09	28.3	0.088	0.09	0.09	0.092	0.089	0.089	0.092	0.088	0.091	0.096	0.092	0.093	0.092	0.677	0.672	0.684	0.671	0.681	0.7	0.706	0.699	0.726	0.097	0.09	0.087	0.688	0.673	0.665	0.636	0.742	0.72	0.771	0.663	0.754	0.09	0.089	0.092	0.713	0.663	0.682	0.684	0.735	0.697	0.741	0.755	0.724	0.091
	13:15:09	28.3	0.088	0.09	0.09	0.092	0.089	0.089	0.092	0.088	0.091	0.096	0.092	0.093	0.092	0.679	0.673	0.687	0.672	0.684	0.7	0.708	0.702	0.726	0.097	0.09	0.087	0.687	0.672	0.666	0.64	0.744	0.724	0.773	0.662	0.755	0.09	0.089	0.092	0.714	0.66	0.679	0.687	0.734	0.695	0.743	0.755	0.727	0.091
	13:20:09	28.3	0.088	0.09	0.09	0.092	0.09	0.089	0.092	0.088	0.091	0.096	0.092	0.093	0.092	0.679	0.674	0.688	0.67	0.682	0.701	0.707	0.701	0.727	0.097	0.09	0.087	0.687	0.672	0.671	0.647	0.742	0.726	0.775	0.663	0.756	0.09	0.089	0.092	0.709	0.658	0.68	0.69	0.729	0.696	0.747	0.758	0.727	0.091
	13:25:09	28.3	0.088	0.09	0.089	0.091	0.09	0.089	0.092	0.088	0.091	0.096	0.092	0.093	0.092	0.68	0.675	0.689	0.67	0.68	0.702	0.71	0.703	0.727	0.097	0.09	0.087	0.689	0.671	0.668	0.653	0.741	0.726	0.776	0.663	0.756	0.09	0.089	0.092	0.71	0.658	0.678	0.694	0.724	0.696	0.748	0.759	0.726	0.091
	13:30:09	28.3	0.088	0.09	0.09	0.092	0.09	0.089	0.092	0.088	0.091	0.096	0.092	0.093	0.092	0.681	0.676	0.679	0.67	0.678	0.705	0.709	0.705	0.728	0.097	0.09	0.087	0.69	0.67	0.667	0.657	0.743	0.726	0.776	0.664	0.756	0.09	0.089	0.092	0.71	0.66	0.676	0.698	0.726	0.694	0.748	0.757	0.725	0.091
	13:35:09	28.3	0.088	0.09	0.09	0.091	0.089	0.089	0.092	0.088	0.091	0.096	0.092	0.093	0.092	0.681	0.677	0.681	0.669	0.678	0.704	0.71	0.706	0.729	0.097	0.09	0.087	0.689	0.665	0.668	0.661	0.742	0.727	0.775	0.662	0.756	0.09	0.089	0.092	0.706	0.66	0.677	0.703	0.722	0.695	0.749	0.756	0.726	0.091
	13:40:09	28.3	0.089	0.09	0.09	0.092	0.09	0.089	0.092	0.088	0.091	0.096	0.092	0.093	0.092	0.681	0.678	0.678	0.669	0.679	0.704	0.709	0.708	0.729	0.097	0.09	0.087	0.688	0.668	0.669	0.665	0.741	0.727	0.776	0.663	0.756	0.09	0.089	0.092	0.708	0.661	0.679	0.708	0.724	0.697	0.75	0.757	0.727	0.091
	13:45:09	28.3	0.088	0.09	0.089	0.092	0.089	0.089	0.092	0.088	0.091	0.096	0.092	0.093	0.092	0.682	0.678	0.678	0.67	0.682	0.706	0.71	0.71	0.73	0.097	0.09	0.087	0.688	0.669	0.671	0.667	0.739	0.729	0.779	0.662	0.756	0.09	0.089	0.092	0.709	0.66	0.682	0.71	0.721	0.694	0.751	0.754	0.727	0.091
	13:50:09	28.3	0.088	0.09	0.089	0.091	0.089	0.089	0.092	0.088	0.091	0.096	0.092	0.093	0.091	0.681	0.676	0.681	0.672	0.68	0.704	0.709	0.708	0.729	0.097	0.09	0.087	0.685	0.668	0.672	0.664	0.738	0.729	0.781	0.662	0.757	0.09	0.089	0.092	0.709	0.659	0.682	0.711	0.72	0.693	0.762	0.758	0.73	0.091
	13:55:09	28.3	0.088	0.09	0.09	0.091	0.089	0.089	0.092	0.088	0.091	0.096	0.092	0.093	0.092	0.682	0.677	0.681	0.674	0.683	0.707	0.71	0.711	0.73	0.097	0.09	0.087	0.69	0.673	0.674	0.674	0.74	0.732	0.784	0.661	0.758	0.09	0.088	0.092	0.703	0.661	0.687	0.716	0.723	0.695	0.757	0.757	0.725	0.091
	14:00:09	28.3	0.088	0.09	0.09	0.092	0.089	0.089	0.092	0.088	0.091	0.096	0.092	0.093	0.092	0.682	0.677	0.679	0.674	0.684	0.703	0.711	0.714	0.733	0.097	0.09	0.087	0.69	0.675	0.675	0.675	0.739	0.728	0.781	0.664	0.761	0.09	0.089	0.092	0.703	0.661	0.689	0.715	0.724	0.694	0.752	0.758	0.729	0.091
	14:05:09	28.3	0.088	0.09	0.09	0.092	0.09	0.089	0.092	0.088	0.091	0.096	0.092	0.093	0.092	0.682	0.677	0.68	0.674	0.685	0.703	0.711	0.714	0.734	0.097	0.09	0.087	0.688	0.674	0.673	0.679	0.739	0.729	0.781	0.663	0.76	0.09	0.089	0.092	0.697	0.663	0.69	0.716	0.718	0.694	0.752	0.756	0.729	0.091
	14:10:09	28.3	0.088	0.09	0.089	0.091	0.089	0.089	0.092	0.088	0.091	0.096	0.092	0.093	0.091	0.681	0.677	0.681	0.675	0.686	0.706	0.711	0.715	0.734	0.097	0.09	0.087	0.69	0.673	0.673	0.679	0.741	0.731	0.78	0.664	0.76	0.09	0.089	0.092	0.704	0.663	0.691	0.716	0.718	0.696	0.752	0.76	0.729	0.091
	14:15:09	28.3	0.089	0.09	0.09	0.092	0.09	0.089	0.092	0.088	0.091	0.096	0.092	0.093	0.092	0.681	0.678	0.686	0.675	0.687	0.706	0.711	0.715	0.736	0.097	0.09	0.088	0.69	0.674	0.675	0.682	0.738	0.731	0.781	0.664	0.761	0.09	0.089	0.092	0.709	0.665	0.691	0.716	0.718	0.698	0.754	0.759	0.728	0.091
	14:20:09	28.3	0.088	0.09	0.089	0.092	0.089	0.089	0.092	0.088	0.091	0.096	0.092	0.093	0.092	0.681	0.678	0.678	0.675	0.689	0.707	0.712	0.718	0.736	0.097	0.09	0.087	0.696	0.675	0.677	0.682	0.736	0.734	0.783	0.663	0.762	0.09	0.089	0.092	0.71	0.664	0.692	0.716	0.721	0.698	0.754	0.76	0.728	0.091
	14:25:09	28.3	0.089	0.09	0.09	0.092	0.089	0.089	0.092	0.088	0.091	0.096	0.092	0.093	0.092	0.681	0.679	0.685	0.675	0.688	0.708	0.712	0.718	0.736	0.097	0.09	0.087	0.691	0.673	0.679	0.683	0.737	0.736	0.783	0.664	0.762	0.09	0.089	0.092	0.713	0.665	0.693	0.717	0.717	0.699	0.758	0.759	0.728	0.091
	14:30:09	28.3	0.088	0.09	0.089	0.091	0.089	0.089	0.092	0.088	0.091	0.096	0.092	0.093	0.092	0.681	0.68	0.69	0.676	0.689	0.71	0.713	0.718	0.735	0.097	0.09	0.087	0.69	0.673	0.68	0.684	0.738	0.736	0.784	0.663	0.761	0.09	0.089	0.092	0.709	0.664	0.696	0.719	0.716	0.7	0.758	0.757	0.731	0.091
	14:35:09	28.3	0.089	0.09	0.09	0.092	0.09	0.089	0.092	0.088	0.091	0.096	0.092	0.093	0.092	0.681	0.68	0.694	0.675	0.689	0.709	0.712	0.718	0.737	0.097	0.09	0.088	0.696	0.673	0.682	0.685	0.738	0.734	0.783	0.665	0.761	0.091	0.089	0.092	0.711	0.664	0.698	0.72	0.716	0.701	0.76	0.76	0.727	0.091
	14:40:09	28.3	0.088	0.09	0.09	0.092	0.089	0.089	0.092	0.088	0.091	0.096	0.092	0.093	0.091	0.682	0.68	0.697	0.675	0.688	0.711	0.714	0.72	0.737	0.097	0.09	0.087	0.696	0.675	0.684	0.693	0.737	0.732	0.782	0.665	0.762	0.09	0.089	0.092	0.713	0.664	0.699	0.724	0.715	0.702	0.759	0.761	0.727	0.091
	14:45:09	28.3	0.088	0.09	0.09	0.092	0.09	0.089	0.092	0.088	0.091	0.096	0.092	0.093	0.092	0.683	0.68	0.698	0.676	0.69	0.712	0.715	0.722	0.738	0.097	0.09	0.087	0.683	0.677	0.683	0.689	0.739	0.735	0.779	0.664	0.762	0.09	0.089	0.092	0.711	0.666	0.699	0.722	0.715	0.705	0.76	0.761	0.731	0.091
	14:50:09	28.3	0.088	0.09	0.09	0.092	0.089	0.089	0.092	0.088	0.091	0.096	0.092	0.093	0.092	0.684	0.681	0.698	0.676	0.691	0.712	0.714	0.722	0.74	0.097	0.09	0.087	0.683	0.678	0.683	0.685	0.739	0.737	0.779	0.665	0.763	0.091	0.089	0.092	0.703	0.666	0.7	0.718	0.714	0.703	0.76	0.761	0.729	0.091
	14:55:09	28.3	0.088	0.09	0.089	0.092	0.089	0.089	0.092	0.088	0.091	0.096	0.092	0.093	0.092	0.685	0.682	0.698	0.676	0.692	0.713	0.716	0.724	0.739	0.097	0.09	0.087	0.688	0.68	0.684	0.684	0.741	0.737	0.781	0.664	0.764	0.09	0.089	0.092	0.7	0.665	0.698	0.718	0.714	0.706	0.761	0.762	0.73	0.091
	15:00:09	28.3	0.088	0.09	0.089	0.092	0.089	0.089	0.092	0.088	0.091	0.096	0.092	0.093	0.092	0.684	0.682	0.697	0.677	0.692	0.713	0.716	0.722	0.739	0.097	0.09	0.087	0.695	0.682	0.684	0.68	0.741	0.737	0.783	0.663	0.763	0.091	0.089	0.092	0.696	0.666	0.699	0.718	0.718	0.706	0.765	0.762	0.731	0.091
	15:05:09	28.3	0.088	0.09	0.09	0.092	0.09	0.089	0.092	0.088	0.091	0.096	0.092	0.093	0.092	0.685	0.683	0.696	0.676	0.691	0.714	0.716	0.723	0.74	0.097	0.09	0.087	0.693	0.682	0.684	0.681	0.743	0.737	0.784	0.664	0.764	0.09	0.089	0.092	0.694	0.667	0.7	0.721	0.72	0.708	0.767	0.766	0.728	0.091
	15:10:09	28.3	0.088	0.09	0.09	0.092	0.089	0.089	0.092	0.088	0.091	0.096	0.092	0.093	0.091	0.685	0.682	0.696	0.677	0.692	0.715	0.718	0.724	0.741	0.097	0.09	0.087	0.695	0.683	0.684	0.682	0.745	0.737	0.78	0.664	0.764	0.09	0.089	0.092	0.7	0.669	0.7	0.719	0.714	0.709	0.768	0.765	0.728	0.091
	15:15:09	28.3	0.088	0.09	0.089	0.091	0.089	0.089	0.092	0.088	0.091	0.096	0.092	0.093	0.092	0.686	0.684	0.697	0.677	0.692	0.716	0.718	0.725	0.741	0.097	0.09	0.087	0.699	0.684	0.685	0.684	0.747	0.739	0.786	0.664	0.765	0.09	0.089	0.092	0.706	0.67	0.701	0.72	0.717	0.709	0.767	0.766	0.728	0.091
	15:20:09	28.3	0.088	0.09	0.089	0.091	0.089	0.089	0.092	0.088	0.091	0.096	0.092	0.093	0.091	0.686	0.682	0.699	0.677	0.693	0.716	0.718	0.726	0.74	0.097	0.09	0.087	0.696	0.686	0.684	0.684	0.747	0.739	0.783	0.665	0.766	0.09	0.089	0.092	0.706	0.67	0.701	0.719	0.715	0.71	0.769	0.767	0.728	0.091
	15:25:09	28.3	0.088	0.09	0.09	0.092	0.089	0.089	0.092	0.088	0.091	0.096	0.092	0.093	0.092	0.686	0.686	0.7	0.678	0.693	0.716	0.719	0.727	0.74	0.097	0.09	0.087	0.693	0.687	0.685	0.684	0.746	0.74	0.782	0.665	0.765	0.09	0.089	0.092	0.709	0.671	0.701	0.72	0.716	0.71	0.765	0.768	0.729	0.091
	15:30:09	28.3	0.088	0.09	0.09	0.092	0.089	0.089	0.092	0.088	0.091	0.096	0.092	0.093	0.091	0.687	0.688	0.7	0.68	0.694	0.719	0.722	0.73	0.743	0.097	0.09	0.087	0.695	0.689	0.685	0.685	0.748	0.743	0.784	0.667	0.767	0.091	0.089	0.092	0.707	0.671	0.7	0.719	0.716	0.712	0.768	0.772	0.729	0.091
	15:35:09	28.3	0.088	0.09	0.09	0.092	0.09	0.089	0.092	0.088	0.091	0.096	0.092	0.093	0.092	0.689	0.689	0.7	0.68	0.695	0.719	0.721	0.73	0.742	0.097	0.09	0.087	0.695	0.69	0.684	0.684	0.749	0.744	0.786	0.667	0.768	0.09	0.089	0.092	0.705	0.671	0.7	0.72	0.719	0.711	0.768	0.771	0.73	0.091
	15:40:09	28.3	0.088	0.09	0.09	0.091	0.089	0.089	0.092	0.088	0.091	0.096	0.092	0.093	0.091	0.689	0.689	0.699	0.68	0.695	0.718	0.721	0.727	0.742	0.097	0.09	0.087	0.694	0.689	0.684	0.686	0.749	0.744	0.788	0.667	0.767	0.09	0.088	0.092	0.703	0.67	0.701	0.72	0.719	0.713	0.767	0.774	0.73	0.091
	15:45:09	28.3	0.088	0.09	0.09	0.092	0.09	0.089	0.092	0.088	0.091	0.096	0.092	0.093	0.092	0.69	0.692	0.699	0.681	0.697	0.718	0.722	0.729	0.743	0.097	0.09	0.087	0.695	0.689	0.684	0.684	0.749	0.744	0.787	0.666	0.768	0.09	0.089	0.092	0.702	0.672	0.701	0.721	0.719	0.712	0.773	0.775	0.73	0.091
	15:50:09	28.3	0.088	0.09	0.09	0.091	0.089	0.089	0.092	0.088	0.091	0.096	0.092	0.093	0.092	0.69	0.692	0.701	0.682	0.696	0.719	0.723	0.73	0.742	0.097	0.09	0.087	0.693	0.689	0.682	0.683	0.75	0.745	0.783	0.668	0.768	0.09	0.089	0.092	0.7	0.673	0.702	0.72	0.72	0.715	0.774	0.777	0.729	0.091
	15:55:09	28.3	0.088	0.09	0.089	0.091	0.089	0.089	0.092	0.088	0.091	0.096	0.092	0.093	0.091	0.691	0.692	0.701	0.683	0.696	0.72	0.725	0.73	0.743	0.097	0.09	0.087	0.693	0.689	0.682	0.686	0.753	0.746	0.788	0.669	0.769	0.09	0.089	0.092	0.701	0.674	0.702	0.719	0.72	0.715	0.773	0.776	0.73	0.091
	16:00:09	28.3	0.088	0.09	0.089	0.091	0.089	0.089	0.092	0.088	0.091	0.096	0.092	0.093	0.091	0.692	0.693	0.701	0.683	0.697	0.72	0.726	0.73	0.744	0.097	0.09	0.087	0.692	0.689	0.682	0.684	0.752	0.746	0.79	0.669	0.769	0.09	0.089	0.092	0.704	0.674	0.701	0.715	0.721	0.714	0.774	0.776	0.73	0.091
	16:05:09	28.3	0.088	0.09	0.09	0.091	0.089	0.089	0.092	0.088	0.091	0.096	0.092	0.093	0.092	0.692	0.694	0.7	0.684	0.698	0.72	0.724	0.733	0.744	0.097	0.09	0.087	0.691	0.688	0.681	0.684	0.754	0.747	0.79	0.669	0.769	0.09	0.089	0.092	0.707	0.673	0.7	0.717	0.722	0.715	0.778	0.779	0.729	0.091
	16:10:09	28.3	0.088	0.09	0.089	0.091	0.089	0.089	0.092	0.088	0.091	0.096	0.092	0.093	0.091	0.693	0.694	0.7	0.684	0.698	0.721	0.725	0.734	0.743	0.097	0.09	0.087	0.692	0.689	0.681	0.687	0.756	0.746	0.791	0.672	0.769	0.09	0.089	0.092	0.709	0.674	0.7	0.72	0.724	0.716	0.781	0.778	0.73	0.091
	16:15:09	28.3	0.088	0.09	0.09	0.092	0.089	0.089	0.092	0.088	0.091	0.096	0.092	0.093	0.092	0.695	0.696	0.7	0.686	0.699	0.721	0.728	0.735	0.744	0.097	0.09	0.087	0.696	0.69	0.681	0.69	0.757	0.746	0.791	0.671	0.77	0.09	0.089	0.092	0.71	0.674	0.699	0.722	0.725	0.719	0.781	0.78	0.731	0.091
	16:20:09	28.3	0.088	0.09	0.09	0.092	0.089	0.089	0.092	0.088	0.091	0.096	0.092	0.093	0.092	0.695	0.696	0.699	0.687	0.7	0.723	0.728	0.735	0.745	0.097	0.09	0.087	0.697	0.691	0.681	0.693	0.758	0.748	0.795	0.671	0.771	0.09	0.089	0.092	0.712	0.674	0.699	0.723	0.729	0.718	0.783	0.781	0.734	0.091
	16:25:09	28.3	0.088	0.09	0.09	0.091	0.089	0.089	0.092	0.088	0.091	0.096	0.092	0.093	0.091	0.696	0.697	0.7	0.688	0.701	0.721	0.729	0.736	0.745	0.097	0.09	0.087	0.699	0.691	0.681	0.692	0.761	0.747	0.79	0.672	0.771	0.09	0.089	0.092	0.71	0.673	0.698	0.722	0.73	0.717	0.785	0.781	0.731	0.091
	16:30:09	28.3	0.088	0.09	0.09	0.091	0.089	0.089	0.092	0.088	0.091	0.096	0.092	0.093	0.091	0.696	0.697	0.7	0.689	0.703	0.722	0.731	0.738	0.746	0.097	0.09	0.087	0.702	0.691	0.68	0.692	0.762	0.748	0.793	0.671	0.772	0.09	0.089	0.092	0.708	0.673	0.699	0.724	0.733	0.717	0.787	0.782	0.733	0.091
	16:35:09	28.3	0.088	0.09	0.09	0.091	0.089	0.089	0.092	0.088	0.091	0.096	0.092	0.093	0.092	0.695	0.698	0.699	0.69	0.703	0.723	0.73	0.734	0.748	0.097	0.09	0.087	0.704	0.689	0.68	0.691	0.761	0.75	0.792	0.672	0.772	0.09	0.089	0.092	0.707	0.672	0.698	0.721	0.731	0.719	0.786	0.782	0.735	0.091
	16:40:09	28.3	0.088	0.09	0.09	0.091	0.089	0.089	0.092	0.088	0.091	0.096	0.092	0.093	0.092	0.697	0.699	0.7	0.691	0.703	0.725	0.731	0.737	0.746	0.097	0.09	0.087	0.705	0.689	0.679	0.692	0.762	0.749	0.798	0.674	0.773	0.09	0.089	0.092	0.704	0.672	0.698	0.721	0.733	0.719	0.789	0.783	0.733	0.091
	16:45:09	28.3	0.088	0.09	0.09	0.092	0.09	0.089	0.092	0.088	0.091	0.096	0.092	0.093	0.092	0.698	0.699	0.7	0.692	0.703	0.726	0.732	0.74	0.747	0.097	0.09	0.087	0.704	0.689	0.68	0.693	0.761	0.749	0.796	0.675	0.773	0.09	0.089	0.092	0.71	0.672	0.698	0.722	0.732	0.718	0.788	0.783	0.732	0.091
	16:50:09	28.3	0.088	0.09	0.09	0.092	0.09	0.089	0.092	0.088	0.091	0.096	0.092	0.093	0.091	0.701	0.7	0.701	0.693	0.704	0.726	0.732	0.742	0.748	0.097	0.09	0.087	0.703	0.688	0.68	0.693	0.762	0.75	0.8	0.675	0.774	0.09	0.089	0.092	0.712	0.671	0.696	0.722	0.733	0.719	0.79	0.784	0.731	0.091
	16:55:09	28.3	0.088	0.09	0.09	0.091	0.089	0.089	0.092	0.088	0.091	0.096	0.092	0.093	0.091	0.701	0.7	0.702	0.694	0.704	0.725	0.734	0.737	0.748	0.097	0.09	0.087	0.702	0.689	0.68	0.693	0.764	0.751	0.798	0.676	0.773	0.09	0.089	0.092	0.716	0.671	0.696	0.723	0.734	0.719	0.792	0.785	0.732	0.091
	17:00:09	28.3	0.088	0.09	0.09	0.091	0.089	0.089	0.092	0.088	0.091	0.096	0.092	0.093	0.092	0.701	0.701	0.702	0.695	0.706	0.726	0.734	0.743	0.748	0.097	0.09	0.087	0.701	0.689	0.68	0.696	0.765	0.751	0.806	0.677	0.774	0.09	0.089	0.092	0.717	0.671	0.695	0.724	0.734	0.72	0.798	0.787	0.733	0.091
	17:05:09	28.3	0.088	0.09	0.09	0.092	0.089	0.089	0.092	0.088	0.091	0.096	0.092	0.093	0.092	0.701	0.701	0.703	0.697	0.707	0.728	0.735	0.742	0.748	0.097	0.09	0.087	0.702	0.688	0.682	0.696	0.765	0.751	0.809	0.677	0.776	0.09	0.089	0.092	0.717	0.672	0.694	0.729	0.735	0.72	0.799	0.786	0.733	0.091
	17:10:09	28.3	0.088	0.09	0.09	0.092	0.089	0.089	0.092	0.088	0.091	0.096	0.092	0.093	0.091	0.702	0.7	0.704	0.698	0.707	0.728	0.735	0.742	0.749	0.097	0.09	0.087	0.704	0.689	0.682	0.703	0.766	0.752	0.807	0.677	0.776	0.09	0.089	0.092	0.717	0.672	0.696	0.726	0.737	0.722	0.797	0.788	0.735	0.091
	17:15:09	28.3	0.088	0.09	0.089	0.091	0.089	0.089	0.092	0.088	0.091	0.096	0.092	0.093	0.091	0.702	0.704	0.705	0.698	0.709	0.729	0.735	0.744	0.75	0.097	0.09	0.087	0.707	0.689	0.682	0.702	0.766	0.752	0.806	0.677	0.776	0.09	0.089	0.092	0.718	0.672	0.696	0.726	0.738	0.723	0.799	0.787	0.736	0.091
	17:20:09	28.3	0.088	0.09	0.09	0.091	0.089	0.089	0.092	0.088	0.091	0.096	0.092	0.093	0.092	0.703	0.704	0.705	0.699	0.709	0.73	0.736	0.743	0.75	0.097	0.09	0.087	0.708	0.689	0.682	0.704	0.765	0.751	0.81	0.679	0.775	0.09	0.089	0.092	0.715	0.672	0.697	0.728	0.739	0.724	0.802	0.788	0.734	0.091
	17:25:09	28.3	0.088	0.09	0.09	0.092	0.089	0.089	0.092	0.088	0.091	0.096	0.092	0.093	0.092	0.703	0.704	0.706	0.699	0.71	0.731	0.738	0.746	0.751	0.097	0.09	0.087	0.709	0.689	0.682	0.709	0.766	0.752	0.813	0.681	0.776	0.09	0.089	0.092	0.715	0.672	0.698	0.728	0.741	0.726	0.804	0.788	0.735	0.091
	17:30:09	28.3	0.089	0.09	0.09	0.092	0.089	0.089	0.092	0.088	0.091	0.096	0.092	0.093	0.092	0.704	0.706	0.707	0.701	0.711	0.732	0.738	0.747	0.752	0.097	0.09	0.087	0.71	0.688	0.683	0.71	0.765	0.753	0.815	0.68	0.777	0.09	0.089	0.092	0.713	0.672	0.699	0.728	0.744	0.726	0.802	0.788	0.736	0.091
	17:35:09	28.3	0.088	0.09	0.09	0.091	0.089	0.089	0.092	0.088	0.091	0.096	0.092	0.093	0.092	0.704	0.706	0.707	0.701	0.711	0.732	0.739	0.746	0.753	0.097	0.09	0.087	0.71	0.689	0.684	0.708	0.765	0.753	0.815	0.681	0.778	0.09	0.089	0.092	0.716	0.672	0.697	0.728	0.744	0.726	0.804	0.789	0.736	0.091
	17:40:09	28.3	0.088	0.09	0.09	0.091	0.089	0.089	0.092	0.088	0.091	0.096	0.092	0.093	0.092	0.706	0.707	0.709	0.702	0.712	0.734	0.74	0.747	0.754	0.097	0.09	0.087	0.71	0.688	0.685	0.709	0.764	0.754	0.816	0.681	0.779	0.09	0.089	0.092	0.716	0.672	0.697	0.731	0.745	0.727	0.81	0.79	0.737	0.091
	17:45:09	28.3	0.088	0.09	0.09	0.092	0.089	0.089	0.092	0.088	0.091	0.096	0.092	0.093	0.092	0.707	0.71	0.711	0.702	0.713	0.734	0.74	0.748	0.754	0.097	0.09	0.087	0.708	0.688	0.685	0.711	0.764	0.755	0.817	0.681	0.778	0.09	0.089	0.092	0.716	0.672	0.697	0.733	0.744	0.728	0.81	0.791	0.735	0.091
	17:50:09	28.3	0.088	0.09	0.09	0.092	0.089	0.089	0.092	0.088	0.091	0.096	0.092	0.093	0.092	0.708	0.711	0.713	0.705	0.713	0.735	0.741	0.749	0.753	0.097	0.09	0.087	0.703	0.689	0.686	0.713	0.765	0.756	0.818	0.681	0.777	0.091	0.089	0.092	0.717	0.671	0.696	0.73	0.745	0.727	0.811	0.79	0.739	0.091
	17:55:09	28.3	0.089	0.09	0.09	0.092	0.089	0.089	0.092	0.088	0.091	0.096	0.092	0.093	0.092	0.708	0.712	0.712	0.706	0.714	0.735	0.741	0.75	0.754	0.097	0.09	0.087	0.703	0.689	0.686	0.715	0.765	0.756	0.823	0.683	0.779	0.09	0.089	0.092	0.718	0.671	0.697	0.73	0.744	0.729	0.81	0.791	0.741	0.091
	18:00:09	28.3	0.088	0.09	0.09	0.091	0.089	0.089	0.092	0.088	0.091	0.096	0.092	0.093	0.092	0.709	0.714	0.713	0.706	0.714	0.737	0.742	0.749	0.755	0.097	0.09	0.087	0.702	0.69	0.687	0.715	0.766	0.756	0.822	0.683	0.779	0.09	0.089	0.092	0.719	0.671	0.698	0.731	0.745	0.73	0.809	0.792	0.741	0.091
	18:05:09	28.3	0.088	0.09	0.09	0.092	0.089	0.089	0.092	0.088	0.091	0.096	0.092	0.093	0.091	0.71	0.714	0.714	0.708	0.716	0.738	0.743	0.752	0.756	0.096	0.09	0.087	0.703	0.691	0.687	0.715	0.768	0.757	0.822	0.685	0.779	0.09	0.089	0.092	0.719	0.671	0.698	0.733	0.745	0.729	0.812	0.793	0.74	0.091
	18:10:09	28.3	0.088	0.09	0.089	0.091	0.089	0.089	0.092	0.088	0.091	0.096	0.092	0.093	0.091	0.71	0.714	0.714	0.709	0.718	0.738	0.744	0.753	0.756	0.096	0.09	0.087	0.701	0.691	0.686	0.717	0.768	0.758	0.821	0.684	0.781	0.09	0.089	0.092	0.72	0.671	0.7	0.738	0.743	0.731	0.817	0.793	0.744	0.091
	18:15:09	28.3	0.088	0.09	0.09	0.092	0.089	0.089	0.092	0.088	0.091	0.096	0.092	0.093	0.092	0.712	0.715	0.715	0.71	0.719	0.74	0.745	0.752	0.757	0.097	0.09	0.087	0.702	0.692	0.686	0.716	0.768	0.759	0.827	0.686	0.78	0.09	0.089	0.092	0.718	0.67	0.7	0.742	0.743	0.731	0.819	0.793	0.742	0.091
	18:20:09	28.3	0.088	0.09	0.09	0.092	0.089	0.089	0.092	0.088	0.091	0.096	0.092	0.093	0.092	0.712	0.716	0.716	0.712	0.719	0.74	0.745	0.753	0.757	0.097	0.09	0.087	0.702	0.691	0.687	0.72	0.766	0.759	0.825	0.687	0.782	0.09	0.089	0.092	0.715	0.671	0.699	0.744	0.743	0.732	0.816	0.793	0.743	0.091
	18:25:09	28.3	0.088	0.09	0.089	0.091	0.089	0.089	0.092	0.088	0.091	0.096	0.092	0.093	0.091	0.712	0.718	0.716	0.713	0.72	0.742	0.746	0.753	0.759	0.096	0.09	0.087	0.702	0.691	0.688	0.721	0.768	0.76	0.825	0.688	0.783	0.09	0.089	0.091	0.716	0.67	0.699	0.744	0.744	0.732	0.814	0.795	0.744	0.091
	18:30:09	28.3	0.088	0.09	0.09	0.091	0.089	0.089	0.092	0.088	0.091	0.096	0.092	0.093	0.092	0.714	0.719	0.716	0.715	0.721	0.744	0.747	0.753	0.759	0.096	0.09	0.087	0.704	0.691	0.69	0.722	0.768	0.76	0.826	0.687	0.783	0.09	0.089	0.092	0.716	0.671	0.699	0.742	0.746	0.735	0.816	0.795	0.745	0.091
	18:35:09	28.3	0.088	0.09	0.089	0.091	0.089	0.089	0.091	0.088	0.091	0.095	0.092	0.093	0.091	0.715	0.72	0.717	0.716	0.723	0.744	0.749	0.753	0.759	0.096	0.09	0.087	0.705	0.691	0.691	0.719	0.769	0.761	0.828	0.689	0.782	0.09	0.089	0.092	0.716	0.671	0.701	0.744	0.747	0.736	0.816	0.795	0.746	0.091
	18:40:09	28.3	0.088	0.09	0.089	0.091	0.089	0.089	0.092	0.088	0.091	0.096	0.092	0.093	0.092	0.715	0.722	0.716	0.717	0.723	0.746	0.75	0.754	0.76	0.097	0.09	0.087	0.707	0.692	0.692	0.719	0.77	0.763	0.831	0.689	0.785	0.09	0.089	0.092	0.715	0.672	0.702	0.746	0.748	0.736	0.82	0.798	0.747	0.091
	18:45:09	28.3	0.088	0.09	0.09	0.091	0.089	0.089	0.092	0.088	0.091	0.096	0.092	0.093	0.092	0.716	0.723	0.718	0.719	0.724	0.746	0.751	0.755	0.761	0.096	0.09	0.087	0.708	0.693	0.694	0.725	0.771	0.763	0.831	0.689	0.785	0.09	0.089	0.092	0.715	0.672	0.701	0.747	0.747	0.736	0.822	0.797	0.747	0.091
	18:50:09	28.3	0.088	0.09	0.09	0.091	0.089	0.089	0.092	0.088	0.091	0.095	0.092	0.093	0.091	0.717	0.722	0.719	0.72	0.726	0.748	0.752	0.755	0.762	0.096	0.09	0.087	0.708	0.695	0.695	0.728	0.773	0.765	0.829	0.691	0.786	0.09	0.089	0.092	0.714	0.672	0.703	0.749	0.745	0.738	0.824	0.796	0.748	0.091
	18:55:09	28.3	0.088	0.09	0.09	0.091	0.089	0.089	0.092	0.088	0.091	0.095	0.092	0.093	0.091	0.718	0.722	0.721	0.722	0.728	0.749	0.753	0.757	0.764	0.096	0.09	0.087	0.709	0.695	0.696	0.73	0.773	0.766	0.835	0.692	0.787	0.09	0.089	0.092	0.714	0.673	0.704	0.75	0.747	0.738	0.824	0.799	0.749	0.091
	19:00:09	28.3	0.088	0.09	0.09	0.091	0.089	0.089	0.092	0.088	0.091	0.095	0.092	0.093	0.091	0.72	0.724	0.724	0.723	0.729	0.75	0.755	0.756	0.765	0.096	0.09	0.087	0.709	0.695	0.697	0.732	0.774	0.767	0.835	0.692	0.789	0.09	0.089	0.092	0.713	0.674	0.705	0.75	0.752	0.74	0.826	0.799	0.749	0.091
	19:05:09	28.3	0.088	0.09	0.09	0.091	0.089	0.089	0.091	0.088	0.091	0.095	0.092	0.093	0.091	0.722	0.725	0.724	0.723	0.73	0.75	0.756	0.758	0.764	0.096	0.09	0.087	0.709	0.696	0.698	0.731	0.774	0.769	0.836	0.693	0.789	0.09	0.089	0.092	0.715	0.675	0.705	0.75	0.75	0.741	0.825	0.798	0.752	0.091
	19:10:09	28.3	0.088	0.09	0.09	0.092	0.089	0.089	0.092	0.088	0.091	0.095	0.092	0.093	0.092	0.722	0.725	0.725	0.725	0.732	0.751	0.757	0.755	0.767	0.096	0.09	0.087	0.708	0.699	0.698	0.729	0.776	0.769	0.835	0.693	0.79	0.091	0.089	0.092	0.718	0.676	0.707	0.751	0.749	0.743	0.828	0.8	0.751	0.091
	19:15:09	28.3	0.088	0.09	0.09	0.091	0.089	0.089	0.092	0.088	0.091	0.095	0.092	0.093	0.091	0.724	0.726	0.726	0.726	0.733	0.751	0.758	0.759	0.767	0.096	0.09	0.087	0.709	0.701	0.698	0.731	0.776	0.771	0.837	0.692	0.791	0.09	0.089	0.091	0.716	0.676	0.708	0.746	0.751	0.743	0.828	0.8	0.753	0.091
	19:20:09	28.3	0.088	0.09	0.09	0.091	0.089	0.089	0.092	0.088	0.091	0.095	0.092	0.093	0.092	0.725	0.726	0.728	0.727	0.735	0.753	0.759	0.759	0.767	0.096	0.09	0.087	0.709	0.702	0.697	0.732	0.778	0.771	0.838	0.694	0.79	0.09	0.089	0.092	0.716	0.676	0.709	0.748	0.751	0.743	0.828	0.798	0.754	0.091
	19:25:09	28.3	0.089	0.09	0.09	0.092	0.089	0.089	0.092	0.088	0.091	0.095	0.092	0.093	0.092	0.727	0.726	0.73	0.728	0.736	0.754	0.76	0.762	0.768	0.096	0.09	0.087	0.708	0.702	0.698	0.724	0.779	0.772	0.837	0.695	0.791	0.09	0.089	0.092	0.717	0.677	0.71	0.748	0.751	0.745	0.828	0.803	0.754	0.091
	19:30:09	28.3	0.088	0.09	0.09	0.091	0.089	0.089	0.092	0.088	0.091	0.095	0.092	0.093	0.091	0.729	0.726	0.731	0.729	0.737	0.755	0.761	0.76	0.769	0.096	0.09	0.087	0.708	0.704	0.698	0.731	0.779	0.772	0.836	0.696	0.793	0.09	0.089	0.092	0.716	0.677	0.71	0.75	0.752	0.745	0.829	0.8	0.757	0.091
	19:35:09	28.3	0.088	0.09	0.09	0.092	0.089	0.089	0.092	0.088	0.091	0.095	0.092	0.093	0.091	0.731	0.729	0.732	0.73	0.739	0.757	0.763	0.762	0.771	0.096	0.091	0.087	0.708	0.704	0.698	0.736	0.781	0.774	0.837	0.697	0.793	0.09	0.089	0.092	0.717	0.678	0.711	0.751	0.752	0.747	0.832	0.801	0.758	0.091
	19:40:09	28.3	0.088	0.09	0.09	0.092	0.089	0.089	0.092	0.088	0.091	0.095	0.092	0.093	0.092	0.732	0.729	0.733	0.731	0.74	0.758	0.765	0.762	0.77	0.096	0.091	0.087	0.71	0.706	0.698	0.737	0.781	0.774	0.838	0.698	0.793	0.09	0.089	0.092	0.717	0.679	0.71	0.752	0.752	0.747	0.829	0.804	0.758	0.091
	19:45:09	28.3	0.088	0.09	0.09	0.091	0.089	0.089	0.092	0.088	0.091	0.095	0.092	0.093	0.091	0.733	0.732	0.733	0.733	0.74	0.76	0.766	0.764	0.771	0.096	0.09	0.087	0.71	0.705	0.698	0.741	0.782	0.774	0.839	0.699	0.793	0.09	0.089	0.092	0.717	0.68	0.709	0.753	0.753	0.746	0.832	0.803	0.758	0.091
	19:50:09	28.3	0.088	0.09	0.09	0.091	0.089	0.089	0.092	0.088	0.091	0.095	0.092	0.093	0.091	0.734	0.734	0.735	0.734	0.741	0.762	0.765	0.765	0.773	0.096	0.09	0.087	0.711	0.707	0.7	0.74	0.782	0.776	0.84	0.701	0.794	0.09	0.089	0.092	0.718	0.68	0.711	0.751	0.752	0.747	0.833	0.802	0.761	0.091
	19:55:09	28.3	0.088	0.09	0.09	0.091	0.089	0.089	0.092	0.088	0.091	0.095	0.092	0.093	0.092	0.735	0.735	0.736	0.736	0.742	0.763	0.766	0.766	0.774	0.096	0.09	0.087	0.713	0.707	0.703	0.741	0.784	0.778	0.842	0.702	0.796	0.09	0.089	0.092	0.718	0.681	0.712	0.752	0.757	0.748	0.835	0.807	0.763	0.091
	20:00:09	28.3	0.088	0.09	0.09	0.091	0.089	0.089	0.092	0.088	0.091	0.095	0.092	0.093	0.091	0.735	0.736	0.737	0.738	0.743	0.763	0.769	0.768	0.776	0.096	0.09	0.087	0.714	0.708	0.705	0.74	0.784	0.778	0.841	0.702	0.797	0.09	0.089	0.092	0.719	0.682	0.714	0.754	0.755	0.749	0.835	0.808	0.763	0.091
	20:05:09	28.3	0.088	0.09	0.09	0.091	0.089	0.089	0.092	0.088	0.091	0.095	0.092	0.093	0.091	0.736	0.737	0.737	0.741	0.744	0.765	0.77	0.77	0.778	0.096	0.09	0.087	0.714	0.709	0.706	0.743	0.785	0.779	0.842	0.702	0.798	0.09	0.089	0.092	0.721	0.683	0.714	0.754	0.756	0.751	0.837	0.808	0.765	0.091
	20:10:09	28.3	0.088	0.09	0.09	0.091	0.089	0.089	0.092	0.088	0.091	0.095	0.092	0.093	0.091	0.737	0.738	0.737	0.742	0.745	0.766	0.771	0.771	0.777	0.096	0.09	0.087	0.714	0.709	0.709	0.743	0.785	0.78	0.842	0.703	0.799	0.09	0.089	0.092	0.722	0.684	0.714	0.753	0.758	0.752	0.836	0.808	0.764	0.091
	20:15:09	28.3	0.089	0.09	0.09	0.092	0.089	0.089	0.092	0.088	0.091	0.095	0.092	0.093	0.092	0.738	0.739	0.738	0.744	0.747	0.768	0.772	0.771	0.778	0.096	0.091	0.087	0.715	0.711	0.71	0.745	0.786	0.782	0.843	0.704	0.8	0.09	0.089	0.092	0.723	0.686	0.716	0.756	0.758	0.755	0.837	0.81	0.766	0.091
	20:20:09	28.3	0.088	0.09	0.09	0.091	0.089	0.089	0.092	0.088	0.091	0.095	0.092	0.093	0.091	0.738	0.74	0.74	0.745	0.748	0.769	0.772	0.772	0.779	0.096	0.09	0.087	0.715	0.713	0.711	0.745	0.787	0.783	0.844	0.706	0.801	0.09	0.089	0.092	0.724	0.687	0.715	0.756	0.758	0.757	0.839	0.807	0.767	0.091
	20:25:09	28.3	0.088	0.09	0.09	0.091	0.089	0.089	0.091	0.088	0.091	0.095	0.092	0.093	0.091	0.74	0.742	0.741	0.747	0.751	0.77	0.775	0.773	0.781	0.096	0.091	0.087	0.715	0.715	0.711	0.744	0.789	0.784	0.845	0.707	0.801	0.09	0.089	0.092	0.725	0.688	0.717	0.755	0.758	0.758	0.836	0.811	0.767	0.091
	20:30:09	28.3	0.088	0.09	0.089	0.091	0.089	0.089	0.091	0.088	0.091	0.095	0.092	0.093	0.091	0.741	0.744	0.743	0.748	0.752	0.773	0.775	0.773	0.781	0.096	0.09	0.087	0.715	0.715	0.713	0.744	0.791	0.786	0.844	0.707	0.802	0.09	0.089	0.092	0.727	0.688	0.718	0.755	0.759	0.759	0.839	0.814	0.769	0.091
	20:35:09	28.3	0.088	0.09	0.09	0.091	0.089	0.089	0.092	0.088	0.091	0.095	0.092	0.093	0.091	0.742	0.746	0.744	0.75	0.754	0.773	0.776	0.774	0.782	0.096	0.09	0.087	0.716	0.716	0.714	0.743	0.792	0.788	0.845	0.708	0.804	0.09	0.089	0.092	0.727	0.69	0.72	0.757	0.759	0.761	0.839	0.814	0.769	0.091
	20:40:09	28.3	0.089	0.09	0.09	0.091	0.089	0.089	0.092	0.088	0.091	0.095	0.092	0.093	0.092	0.744	0.747	0.746	0.751	0.755	0.774	0.777	0.774	0.784	0.096	0.09	0.087	0.716	0.717	0.713	0.745	0.793	0.788	0.845	0.708	0.804	0.09	0.089	0.092	0.729	0.692	0.722	0.757	0.76	0.762	0.839	0.814	0.771	0.091
	20:45:09	28.3	0.089	0.09	0.09	0.091	0.089	0.089	0.091	0.088	0.091	0.095	0.092	0.093	0.092	0.746	0.748	0.747	0.752	0.756	0.776	0.779	0.776	0.783	0.096	0.09	0.087	0.716	0.718	0.713	0.746	0.795	0.788	0.846	0.709	0.806	0.09	0.089	0.092	0.73	0.693	0.724	0.756	0.761	0.763	0.84	0.814	0.772	0.091
	20:50:09	28.3	0.088	0.09	0.09	0.091	0.089	0.089	0.092	0.088	0.091	0.095	0.092	0.093	0.091	0.747	0.749	0.749	0.753	0.758	0.778	0.781	0.776	0.785	0.096	0.09	0.087	0.716	0.719	0.714	0.746	0.796	0.789	0.848	0.71	0.806	0.09	0.089	0.092	0.731	0.695	0.726	0.757	0.762	0.763	0.842	0.815	0.772	0.091
	20:55:09	28.3	0.088	0.09	0.089	0.091	0.089	0.089	0.091	0.088	0.091	0.095	0.092	0.093	0.091	0.75	0.75	0.751	0.754	0.759	0.778	0.782	0.777	0.788	0.096	0.09	0.087	0.717	0.722	0.714	0.751	0.797	0.79	0.85	0.71	0.807	0.09	0.089	0.091	0.732	0.696	0.727	0.758	0.764	0.765	0.841	0.814	0.773	0.091
	21:00:09	28.3	0.089	0.09	0.09	0.091	0.089	0.089	0.092	0.088	0.091	0.095	0.092	0.093	0.092	0.752	0.75	0.753	0.755	0.761	0.779	0.783	0.779	0.788	0.096	0.091	0.087	0.718	0.722	0.714	0.751	0.799	0.792	0.851	0.711	0.808	0.09	0.089	0.092	0.734	0.697	0.728	0.758	0.765	0.768	0.842	0.816	0.775	0.091
	21:05:09	28.3	0.088	0.09	0.089	0.091	0.089	0.089	0.092	0.088	0.091	0.095	0.092	0.093	0.091	0.753	0.751	0.755	0.756	0.763	0.781	0.783	0.778	0.789	0.096	0.09	0.087	0.719	0.724	0.715	0.75	0.8	0.792	0.851	0.712	0.808	0.09	0.089	0.092	0.735	0.698	0.729	0.758	0.766	0.768	0.843	0.819	0.775	0.091
	21:10:09	28.3	0.088	0.09	0.09	0.091	0.089	0.089	0.092	0.088	0.091	0.095	0.092	0.093	0.092	0.755	0.752	0.756	0.758	0.764	0.782	0.784	0.781	0.789	0.096	0.09	0.087	0.72	0.725	0.717	0.748	0.801	0.794	0.853	0.713	0.809	0.09	0.089	0.092	0.735	0.699	0.73	0.76	0.767	0.767	0.844	0.82	0.777	0.091
	21:15:09	28.3	0.089	0.09	0.089	0.091	0.089	0.089	0.091	0.088	0.091	0.095	0.091	0.093	0.091	0.757	0.752	0.757	0.759	0.765	0.784	0.786	0.782	0.791	0.096	0.09	0.087	0.72	0.725	0.718	0.749	0.803	0.795	0.852	0.712	0.811	0.09	0.089	0.092	0.736	0.701	0.73	0.76	0.767	0.768	0.845	0.818	0.779	0.091
	21:20:08	28.3	0.088	0.09	0.09	0.091	0.089	0.089	0.092	0.088	0.091	0.095	0.092	0.093	0.091	0.758	0.753	0.758	0.759	0.766	0.785	0.787	0.783	0.794	0.096	0.091	0.087	0.721	0.727	0.721	0.749	0.804	0.796	0.851	0.714	0.811	0.09	0.089	0.092	0.738	0.702	0.732	0.761	0.768	0.769	0.845	0.821	0.779	0.091
	21:25:09	28.3	0.088	0.09	0.09	0.092	0.089	0.089	0.092	0.088	0.091	0.095	0.092	0.093	0.091	0.76	0.755	0.759	0.761	0.768	0.787	0.786	0.784	0.792	0.096	0.09	0.087	0.722	0.728	0.723	0.749	0.804	0.798	0.853	0.715	0.812	0.09	0.089	0.092	0.74	0.703	0.733	0.763	0.769	0.77	0.844	0.822	0.78	0.091
	21:30:09	28.3	0.088	0.09	0.09	0.091	0.089	0.089	0.092	0.088	0.091	0.095	0.092	0.093	0.091	0.761	0.756	0.76	0.762	0.768	0.789	0.788	0.786	0.794	0.096	0.09	0.087	0.722	0.729	0.723	0.75	0.804	0.799	0.855	0.716	0.813	0.09	0.089	0.091	0.74	0.704	0.734	0.763	0.77	0.773	0.846	0.821	0.781	0.091
	21:35:09	28.3	0.089	0.09	0.089	0.091	0.089	0.089	0.092	0.088	0.091	0.095	0.091	0.093	0.091	0.762	0.757	0.761	0.763	0.769	0.79	0.79	0.787	0.795	0.096	0.09	0.087	0.724	0.732	0.726	0.752	0.806	0.8	0.855	0.716	0.814	0.09	0.089	0.092	0.74	0.706	0.736	0.763	0.771	0.774	0.846	0.823	0.782	0.091
	21:40:09	28.3	0.088	0.09	0.089	0.091	0.089	0.089	0.092	0.088	0.091	0.095	0.091	0.093	0.091	0.763	0.759	0.761	0.764	0.771	0.792	0.79	0.789	0.796	0.096	0.09	0.087	0.725	0.732	0.727	0.752	0.808	0.8	0.857	0.717	0.818	0.09	0.089	0.092	0.741	0.707	0.737	0.764	0.772	0.776	0.846	0.823	0.784	0.091
	21:45:09	28.3	0.089	0.09	0.09	0.091	0.089	0.089	0.092	0.088	0.091	0.095	0.092	0.093	0.092	0.765	0.761	0.763	0.766	0.773	0.795	0.791	0.79	0.8	0.096	0.09	0.087	0.725	0.733	0.729	0.753	0.808	0.801	0.857	0.717	0.818	0.09	0.089	0.092	0.743	0.708	0.738	0.765	0.773	0.776	0.848	0.826	0.785	0.091
	21:50:09	28.3	0.089	0.09	0.09	0.091	0.089	0.089	0.092	0.088	0.091	0.095	0.091	0.093	0.091	0.766	0.761	0.764	0.767	0.775	0.795	0.792	0.791	0.8	0.096	0.091	0.087	0.726	0.734	0.729	0.754	0.809	0.803	0.855	0.718	0.817	0.09	0.089	0.092	0.742	0.71	0.739	0.765	0.774	0.778	0.849	0.827	0.786	0.091
	21:55:09	28.3	0.088	0.09	0.09	0.091	0.089	0.089	0.092	0.088	0.091	0.095	0.091	0.093	0.091	0.767	0.762	0.765	0.768	0.776	0.796	0.792	0.792	0.8	0.096	0.09	0.087	0.727	0.735	0.731	0.754	0.81	0.804	0.856	0.72	0.819	0.09	0.089	0.092	0.744	0.71	0.742	0.767	0.775	0.78	0.85	0.826	0.786	0.091
	22:00:09	28.3	0.089	0.09	0.09	0.091	0.089	0.089	0.092	0.088	0.091	0.095	0.091	0.093	0.092	0.768	0.764	0.767	0.77	0.777	0.797	0.794	0.793	0.802	0.096	0.09	0.087	0.727	0.737	0.733	0.757	0.812	0.806	0.86	0.721	0.822	0.09	0.089	0.092	0.745	0.712	0.743	0.768	0.776	0.78	0.85	0.83	0.788	0.091
	22:05:09	28.3	0.088	0.09	0.09	0.091	0.089	0.089	0.091	0.088	0.091	0.095	0.092	0.093	0.091	0.77	0.765	0.767	0.772	0.778	0.797	0.795	0.796	0.801	0.096	0.09	0.087	0.727	0.739	0.735	0.757	0.814	0.807	0.86	0.721	0.821	0.09	0.089	0.092	0.745	0.714	0.744	0.768	0.777	0.781	0.851	0.83	0.79	0.091
	22:10:09	28.3	0.088	0.09	0.09	0.091	0.089	0.089	0.092	0.088	0.091	0.095	0.091	0.093	0.091	0.771	0.766	0.768	0.773	0.78	0.798	0.795	0.797	0.803	0.096	0.09	0.087	0.729	0.74	0.736	0.759	0.815	0.809	0.858	0.723	0.825	0.09	0.089	0.091	0.745	0.715	0.745	0.768	0.778	0.781	0.852	0.833	0.79	0.091
	22:15:09	28.3	0.088	0.09	0.09	0.091	0.089	0.089	0.092	0.088	0.091	0.095	0.091	0.093	0.091	0.772	0.768	0.769	0.774	0.781	0.799	0.797	0.799	0.805	0.096	0.09	0.087	0.729	0.742	0.736	0.76	0.816	0.81	0.86	0.723	0.824	0.09	0.089	0.091	0.747	0.716	0.747	0.77	0.78	0.783	0.853	0.831	0.791	0.091
	22:20:09	28.3	0.088	0.09	0.089	0.091	0.089	0.089	0.091	0.088	0.09	0.095	0.091	0.093	0.091	0.773	0.769	0.771	0.775	0.782	0.8	0.799	0.8	0.804	0.096	0.09	0.087	0.731	0.742	0.737	0.76	0.817	0.811	0.859	0.724	0.823	0.09	0.089	0.092	0.749	0.717	0.747	0.771	0.781	0.784	0.853	0.831	0.792	0.091
	22:25:09	28.3	0.089	0.09	0.09	0.091	0.089	0.089	0.091	0.088	0.091	0.095	0.091	0.093	0.091	0.774	0.769	0.772	0.776	0.783	0.803	0.8	0.802	0.806	0.096	0.09	0.087	0.732	0.744	0.739	0.761	0.819	0.813	0.86	0.725	0.827	0.09	0.089	0.092	0.749	0.718	0.749	0.771	0.783	0.786	0.853	0.835	0.792	0.091
	22:30:09	28.3	0.088	0.09	0.089	0.091	0.089	0.089	0.091	0.088	0.09	0.095	0.091	0.093	0.091	0.775	0.77	0.775	0.778	0.786	0.804	0.8	0.804	0.81	0.096	0.09	0.087	0.733	0.744	0.74	0.761	0.82	0.814	0.863	0.725	0.828	0.09	0.089	0.092	0.751	0.719	0.75	0.773	0.784	0.786	0.856	0.836	0.794	0.091
	22:35:09	28.3	0.088	0.09	0.09	0.091	0.089	0.089	0.091	0.088	0.091	0.095	0.091	0.093	0.091	0.776	0.772	0.775	0.78	0.787	0.806	0.801	0.805	0.808	0.096	0.091	0.087	0.736	0.746	0.74	0.76	0.82	0.814	0.863	0.727	0.83	0.09	0.089	0.092	0.752	0.721	0.751	0.774	0.786	0.788	0.855	0.84	0.796	0.091
	22:40:09	28.3	0.088	0.09	0.09	0.091	0.089	0.089	0.091	0.088	0.09	0.095	0.091	0.093	0.091	0.777	0.773	0.777	0.78	0.789	0.807	0.802	0.807	0.809	0.096	0.09	0.087	0.737	0.747	0.741	0.761	0.822	0.816	0.863	0.728	0.829	0.09	0.089	0.091	0.753	0.722	0.753	0.774	0.788	0.79	0.856	0.84	0.796	0.091
	22:45:09	28.3	0.088	0.09	0.09	0.091	0.089	0.089	0.091	0.088	0.091	0.095	0.091	0.093	0.091	0.779	0.774	0.778	0.782	0.789	0.81	0.804	0.808	0.809	0.096	0.09	0.087	0.738	0.748	0.741	0.762	0.823	0.818	0.865	0.73	0.831	0.09	0.089	0.092	0.755	0.724	0.752	0.776	0.788	0.793	0.858	0.841	0.797	0.091
	22:50:09	28.3	0.088	0.09	0.09	0.091	0.089	0.089	0.091	0.088	0.091	0.094	0.091	0.093	0.091	0.781	0.775	0.779	0.783	0.789	0.811	0.805	0.809	0.812	0.096	0.09	0.087	0.739	0.75	0.742	0.763	0.824	0.818	0.866	0.731	0.831	0.09	0.089	0.091	0.756	0.725	0.754	0.777	0.789	0.795	0.859	0.843	0.798	0.091
	22:55:09	28.3	0.088	0.09	0.09	0.091	0.089	0.089	0.091	0.088	0.09	0.094	0.091	0.093	0.091	0.783	0.776	0.782	0.785	0.791	0.811	0.806	0.811	0.812	0.096	0.09	0.087	0.739	0.751	0.743	0.764	0.825	0.82	0.866	0.733	0.832	0.09	0.088	0.091	0.758	0.727	0.755	0.777	0.79	0.797	0.858	0.845	0.8	0.091
	23:00:09	28.3	0.088	0.09	0.089	0.091	0.089	0.088	0.091	0.088	0.09	0.094	0.091	0.093	0.091	0.783	0.777	0.784	0.786	0.792	0.812	0.806	0.813	0.814	0.096	0.09	0.087	0.741	0.753	0.745	0.765	0.826	0.821	0.867	0.734	0.832	0.09	0.088	0.091	0.759	0.727	0.757	0.778	0.791	0.798	0.86	0.847	0.801	0.091
	23:05:09	28.3	0.088	0.09	0.089	0.091	0.089	0.089	0.091	0.088	0.09	0.095	0.091	0.093	0.091	0.785	0.778	0.786	0.787	0.793	0.813	0.807	0.815	0.817	0.096	0.09	0.087	0.742	0.754	0.746	0.767	0.828	0.822	0.868	0.735	0.834	0.09	0.089	0.091	0.76	0.729	0.758	0.78	0.792	0.799	0.861	0.844	0.801	0.091
	23:10:09	28.3	0.088	0.09	0.09	0.091	0.089	0.089	0.091	0.088	0.09	0.095	0.091	0.093	0.091	0.787	0.778	0.786	0.788	0.794	0.814	0.809	0.816	0.815	0.096	0.09	0.087	0.744	0.755	0.746	0.768	0.829	0.823	0.868	0.736	0.834	0.09	0.089	0.091	0.761	0.73	0.76	0.781	0.793	0.8	0.861	0.847	0.802	0.091
	23:15:09	28.3	0.088	0.09	0.09	0.091	0.089	0.089	0.091	0.088	0.091	0.095	0.091	0.093	0.091	0.788	0.779	0.788	0.79	0.795	0.817	0.81	0.818	0.817	0.096	0.09	0.087	0.745	0.758	0.747	0.769	0.831	0.825	0.869	0.736	0.835	0.09	0.089	0.091	0.763	0.732	0.761	0.782	0.795	0.801	0.861	0.848	0.803	0.091
	23:20:09	28.3	0.088	0.09	0.09	0.091	0.089	0.089	0.091	0.088	0.09	0.095	0.091	0.093	0.091	0.79	0.78	0.79	0.791	0.797	0.818	0.809	0.819	0.818	0.096	0.091	0.087	0.745	0.759	0.749	0.771	0.832	0.826	0.87	0.738	0.836	0.09	0.089	0.091	0.764	0.734	0.762	0.783	0.796	0.802	0.862	0.848	0.805	0.091
	23:25:09	28.3	0.088	0.09	0.09	0.091	0.089	0.089	0.091	0.088	0.09	0.095	0.091	0.093	0.091	0.791	0.78	0.789	0.793	0.799	0.819	0.811	0.819	0.819	0.096	0.09	0.087	0.746	0.761	0.75	0.771	0.835	0.827	0.87	0.739	0.838	0.09	0.089	0.091	0.765	0.734	0.764	0.784	0.797	0.803	0.863	0.847	0.804	0.091
	23:30:09	28.3	0.088	0.09	0.09	0.091	0.089	0.089	0.091	0.088	0.09	0.095	0.091	0.093	0.091	0.791	0.782	0.791	0.793	0.8	0.82	0.813	0.82	0.822	0.096	0.09	0.087	0.747	0.762	0.752	0.772	0.837	0.828	0.871	0.739	0.84	0.09	0.089	0.092	0.766	0.736	0.764	0.785	0.799	0.804	0.865	0.851	0.806	0.091
	23:35:09	28.3	0.088	0.09	0.09	0.091	0.089	0.089	0.091	0.088	0.091	0.095	0.091	0.093	0.091	0.792	0.783	0.792	0.795	0.801	0.822	0.813	0.821	0.823	0.096	0.09	0.087	0.748	0.763	0.754	0.773	0.837	0.83	0.874	0.74	0.84	0.09	0.089	0.091	0.767	0.737	0.766	0.786	0.8	0.805	0.865	0.851	0.807	0.091
	23:40:09	28.3	0.088	0.09	0.09	0.091	0.089	0.089	0.091	0.088	0.091	0.095	0.091	0.093	0.092	0.793	0.783	0.792	0.796	0.802	0.823	0.814	0.822	0.823	0.096	0.09	0.087	0.749	0.765	0.755	0.774	0.838	0.831	0.873	0.742	0.841	0.09	0.089	0.092	0.769	0.738	0.768	0.787	0.801	0.806	0.866	0.853	0.808	0.091
	23:45:09	28.3	0.088	0.09	0.09	0.091	0.089	0.089	0.091	0.088	0.091	0.094	0.091	0.093	0.091	0.793	0.785	0.793	0.797	0.804	0.824	0.814	0.823	0.824	0.096	0.09	0.087	0.75	0.766	0.756	0.775	0.838	0.831	0.873	0.741	0.842	0.09	0.089	0.091	0.769	0.739	0.768	0.789	0.802	0.807	0.866	0.853	0.808	0.091
	23:50:09	28.3	0.088	0.09	0.09	0.091	0.089	0.089	0.091	0.088	0.09	0.094	0.091	0.093	0.091	0.795	0.786	0.794	0.799	0.805	0.825	0.816	0.823	0.827	0.096	0.09	0.087	0.751	0.767	0.758	0.776	0.84	0.833	0.875	0.742	0.843	0.09	0.089	0.091	0.771	0.74	0.769	0.789	0.804	0.809	0.866	0.856	0.81	0.09
	23:55:09	28.3	0.088	0.09	0.09	0.091	0.089	0.088	0.092	0.088	0.09	0.094	0.091	0.093	0.091	0.795	0.787	0.795	0.799	0.806	0.826	0.817	0.824	0.827	0.096	0.09	0.087	0.752	0.768	0.759	0.778	0.842	0.834	0.875	0.744	0.843	0.09	0.089	0.091	0.772	0.741	0.77	0.79	0.805	0.811	0.867	0.857	0.81	0.091
	1 day, 0:00:09	28.3	0.088	0.09	0.09	0.091	0.089	0.089	0.091	0.088	0.09	0.094	0.091	0.093	0.091	0.797	0.788	0.796	0.802	0.808	0.827	0.817	0.825	0.827	0.095	0.09	0.087	0.752	0.769	0.761	0.779	0.844	0.835	0.876	0.746	0.846	0.09	0.089	0.091	0.772	0.742	0.772	0.792	0.806	0.811	0.866	0.856	0.811	0.09
Results
		1	2	3	4	5	6	7	8	9	10	11	12
	A	-0.08	-0.08	0.06	-0.08	-0.06	0.08	0.06	0.06	-0.06	-0.06	-0.18	-0.06	Max V [600]
		1	1	1	1	1	1	1	1	1	1	1	1	R-Squared [600]
		22:27:39	18:22:39	21:42:39	14:07:39	00:27:39	02:57:39	14:32:39	00:02:39	22:17:39	00:37:39	00:02:39	19:12:39	t at Max V [600]
		22:37:39	18:12:39	22:01:49	13:55:09	00:26:49	02:57:39	14:45:09	00:00:09	21:41:49	00:40:09	00:00:09	18:55:09	Lagtime [600]
		0.013	-0.01	-0.014	-0.01	-0.01	0.014	-0.013	-0.01	-0.01	0.014	-0.06	-0.011	Pf_6n_35h: Max V [600]
		0.698	0.751	0.94	0.467	0.868	0.602	0.691	0.868	0.771	0.661	0.979	0.938	Pf_6n_35h: R-Squared [600]
		02:57:39	06:47:39	02:57:39	17:57:39	21:57:39	02:57:39	18:27:39	07:37:39	23:47:39	03:02:39	01:17:39	05:37:39	Pf_6n_35h: t at Max V [600]
		02:48:46	06:32:13	02:33:09	16:26:43	21:15:31	02:42:29	17:24:01	07:21:27	21:12:06	03:20:09	01:02:56	04:56:12	Pf_6n_35h: Lagtime [600]
		-0.03	0.03	-0.03	-0.03	-0.02	0.03	-0.03	-0.03	0.03	0.04	-0.08	0.03	Pf_3n_35h: Max V [600]
		0.964	0.964	0.964	0.964	0.75	0.519	0.964	0.75	0.964	0.923	0.98	0.964	Pf_3n_35h: R-Squared [600]
		22:05:09	18:15:09	22:55:09	09:15:09	11:35:09	02:55:09	15:50:09	15:10:09	02:55:09	02:55:09	01:20:09	19:05:09	Pf_3n_35h: t at Max V [600]
		22:12:56	18:19:36	22:34:02	08:59:36	11:21:49	02:49:36	15:27:56	14:56:49	02:57:22	03:03:29	01:07:14	19:22:56	Pf_3n_35h: Lagtime [600]
		0.009	-0.005	-0.01	-0.007	-0.005	0.009	-0.006	0.007	-0.007	0.009	-0.052	-0.005	Pf_9n_35h: Max V [600]
		0.675	0.625	0.888	0.807	0.544	0.626	0.442	0.612	0.75	0.618	0.98	0.417	Pf_9n_35h: R-Squared [600]
		02:50:09	02:55:09	02:50:09	14:55:09	17:05:09	02:55:09	15:50:09	02:45:09	03:20:09	03:00:09	01:20:09	18:05:09	Pf_9n_35h: t at Max V [600]
		02:42:45	02:35:09	02:21:16	13:10:36	15:53:43	02:34:55	13:44:40	02:46:49	03:06:49	03:29:38	01:00:55	16:23:04	Pf_9n_35h: Lagtime [600]
	B	0.1	9.6	9.28	6.92	10.48	8.9	6.62	10.3	10.5	9.04	0.08	-0.12	Max V [600]
		1	1	1	1	1	1	1	1	1	1	1	1	R-Squared [600]
		02:57:39	06:52:39	07:12:39	07:52:39	07:27:39	07:12:39	07:27:39	06:47:39	06:52:39	07:12:39	14:32:39	02:57:39	t at Max V [600]
		02:45:09	06:00:32	06:14:58	06:40:51	06:30:52	06:10:36	06:03:50	05:55:40	06:06:54	06:14:44	15:02:39	02:33:29	Lagtime [600]
		0.029	7.239	6.409	5.189	6.756	6.559	4.764	7.073	7.602	5.522	0.016	-0.055	Pf_6n_35h: Max V [600]
		0.788	0.994	0.993	0.996	0.983	0.983	0.985	0.979	0.987	0.968	0.73	0.932	Pf_6n_35h: R-Squared [600]
		02:57:39	06:52:39	07:02:39	07:47:39	07:17:39	07:12:39	07:27:39	06:42:39	06:52:39	07:12:39	03:02:39	02:57:39	Pf_6n_35h: t at Max V [600]
		02:44:49	05:44:45	05:49:45	06:17:07	06:00:53	05:49:40	05:33:26	05:35:15	05:49:52	05:38:56	03:17:14	02:43:40	Pf_6n_35h: Lagtime [600]
		0.06	8.41	7.27	5.86	8.08	8.27	6.34	9.57	9.95	7.6	0.04	-0.08	Pf_3n_35h: Max V [600]
		0.871	0.993	0.975	0.989	0.971	0.998	0.999	0.998	0.999	0.988	0.923	0.923	Pf_3n_35h: R-Squared [600]
		02:55:09	06:50:09	07:10:09	07:50:09	07:25:09	07:10:09	07:30:09	06:45:09	06:55:09	07:15:09	02:55:09	02:55:09	Pf_3n_35h: t at Max V [600]
		02:49:36	05:53:45	05:59:28	06:27:46	06:14:39	06:06:27	06:02:23	05:53:13	06:05:11	06:04:46	03:03:29	02:47:14	Pf_3n_35h: Lagtime [600]
		0.016	6.343	6.105	4.88	5.487	5.608	4.333	6.168	6.563	4.909	0.009	-0.037	Pf_9n_35h: Max V [600]
		0.672	0.986	0.996	0.996	0.971	0.981	0.99	0.982	0.982	0.981	0.601	0.868	Pf_9n_35h: R-Squared [600]
		02:50:09	06:45:09	07:00:09	07:50:09	07:10:09	07:05:09	07:25:09	06:35:09	06:45:09	07:05:09	03:00:09	02:50:09	Pf_9n_35h: t at Max V [600]
		02:33:09	05:34:50	05:46:09	06:11:18	05:42:28	05:35:07	05:22:09	05:24:58	05:39:33	05:26:52	03:27:19	02:35:18	Pf_9n_35h: Lagtime [600]
	C	0.06	-4.704	4.6	4.68	2.64	6.06	4.86	4.72	3.6	9.18	-0.06	0.06	Max V [600]
		1	1	1	1	1	1	1	1	1	1	1	1	R-Squared [600]
		00:22:39	10:57:39	08:57:39	08:22:39	06:07:39	08:17:39	07:52:39	09:42:39	07:52:39	07:42:39	19:12:39	00:02:39	t at Max V [600]
		00:20:09	12:58:18	07:00:09	06:33:26	05:17:34	06:56:49	06:16:53	08:12:58	06:03:44	06:35:33	19:08:29	00:00:09	Lagtime [600]
		-0.019	2.386	3.574	4.011	1.627	3.84	4.223	2.286	3.125	5.647	0.01	0.012	Pf_6n_35h: Max V [600]
		0.917	0.973	0.99	0.996	0.994	0.989	0.997	0.948	0.995	0.965	0.868	0.713	Pf_6n_35h: R-Squared [600]
		02:52:39	10:32:39	08:52:39	08:17:39	10:42:39	08:07:39	07:47:39	09:37:39	07:52:39	07:32:39	07:52:39	02:57:39	Pf_6n_35h: t at Max V [600]
		02:37:13	06:44:37	06:30:23	06:17:19	06:57:36	06:14:46	06:04:53	06:43:51	05:52:10	05:55:24	07:46:10	02:56:16	Pf_6n_35h: Lagtime [600]
		-0.03	3.35	4.36	4.32	1.87	4.66	4.81	3.64	3.57	8.42	0.03	0.03	Pf_3n_35h: Max V [600]
		0.964	1	0.999	0.998	0.947	0.971	1	0.971	1	0.997	0.964	0.964	Pf_3n_35h: R-Squared [600]
		03:00:09	10:40:09	08:55:09	08:20:09	06:05:09	08:15:09	07:50:09	09:40:09	07:55:09	07:40:09	19:05:09	03:00:09	Pf_3n_35h: t at Max V [600]
		02:45:42	07:52:45	06:56:55	06:25:49	05:00:12	06:36:07	06:17:45	07:49:31	06:07:15	06:30:21	19:07:22	02:57:56	Pf_3n_35h: Lagtime [600]
		-0.009	2.192	3.468	3.774	1.489	3.669	3.877	2.094	2.947	5.106	-0.006	0.008	Pf_9n_35h: Max V [600]
		0.626	0.982	0.997	0.997	0.994	0.995	0.995	0.976	0.997	0.981	0.602	0.62	Pf_9n_35h: R-Squared [600]
		02:50:09	10:25:09	08:45:09	08:15:09	10:35:09	08:15:09	07:45:09	09:55:09	08:00:09	07:25:09	22:10:09	02:45:09	Pf_9n_35h: t at Max V [600]
		02:19:12	06:24:18	06:25:58	06:09:34	06:36:34	06:09:37	05:55:43	06:28:25	05:45:06	05:44:48	21:23:05	02:52:24	Pf_9n_35h: Lagtime [600]
	D	-0.06	4.82	4.44	7.18	2.24	4.36	4.8	3.7	4.4	10.46	0.08	-0.08	Max V [600]
		1	1	1	1	1	1	1	1	1	1	1	1	R-Squared [600]
		18:22:39	11:12:39	08:47:39	08:22:39	12:47:39	09:42:39	07:52:39	10:32:39	08:22:39	07:32:39	02:57:39	14:37:39	t at Max V [600]
		18:03:29	09:12:26	07:08:07	07:09:27	08:37:12	07:30:06	06:18:53	08:43:19	06:54:06	06:32:43	03:00:09	14:21:24	Lagtime [600]
		-0.01	2.535	3.501	3.759	1.569	3.234	3.951	2.481	3.314	6.478	0.016	-0.022	Pf_6n_35h: Max V [600]
		0.868	0.981	0.993	0.973	0.995	0.995	0.997	0.98	0.996	0.997	0.56	0.925	Pf_6n_35h: R-Squared [600]
		21:57:39	09:42:39	08:57:39	08:12:39	12:02:39	08:52:39	07:42:39	10:37:39	08:32:39	06:47:39	02:52:39	02:52:39	Pf_6n_35h: t at Max V [600]
		20:23:40	06:43:40	06:45:19	06:07:09	06:48:45	06:42:34	06:01:34	07:53:28	06:28:22	05:46:02	03:05:09	02:41:26	Pf_6n_35h: Lagtime [600]
		-0.03	3.36	4.05	4.65	1.87	3.78	4.43	3.23	3.62	8.04	0.05	-0.05	Pf_3n_35h: Max V [600]
		0.964	0.998	1	0.91	0.999	0.999	0.998	0.993	0.985	0.971	0.893	0.893	Pf_3n_35h: R-Squared [600]
		04:10:09	09:40:09	09:05:09	08:20:09	10:40:09	10:05:09	07:50:09	10:35:09	08:25:09	07:35:09	02:55:09	20:50:09	Pf_3n_35h: t at Max V [600]
		03:57:56	07:26:27	07:04:24	06:32:42	07:15:46	07:23:48	06:13:22	08:31:01	06:38:10	06:16:17	02:59:09	20:40:09	Pf_3n_35h: Lagtime [600]
		-0.009	2.362	3.263	3.5	1.479	3.059	3.637	2.27	3.212	5.674	0.011	-0.017	Pf_9n_35h: Max V [600]
		0.922	0.991	0.994	0.988	0.996	0.996	0.996	0.989	0.998	0.989	0.642	0.925	Pf_9n_35h: R-Squared [600]
		02:55:09	09:50:09	08:55:09	08:05:09	11:45:09	09:00:09	07:45:09	10:45:09	08:30:09	06:45:09	03:00:09	02:55:09	Pf_9n_35h: t at Max V [600]
		02:37:12	06:30:44	06:35:54	05:57:39	06:29:36	06:35:23	05:52:49	07:38:29	06:24:24	05:37:10	03:11:55	02:38:09	Pf_9n_35h: Lagtime [600]
	E	0.06	5.38	13.18	8.84	5.62	13.22	12.3	8.2	13.14	16.02	0.06	0.06	Max V [600]
		1	1	1	1	1	1	1	1	1	1	1	1	R-Squared [600]
		15:57:39	07:37:39	07:17:39	07:02:39	08:22:39	07:27:39	07:27:39	07:37:39	06:37:39	06:47:39	18:12:39	22:12:39	t at Max V [600]
		16:03:29	05:58:15	06:39:32	06:04:35	06:50:37	06:41:22	06:41:58	06:33:24	05:59:44	06:15:38	18:21:49	22:10:09	Lagtime [600]
		-0.015	4.576	7.353	7.033	3.921	7.329	7.274	5.015	8.195	8.277	0.012	-0.01	Pf_6n_35h: Max V [600]
		0.961	0.998	0.946	0.993	0.989	0.965	0.972	0.969	0.967	0.934	0.713	0.435	Pf_6n_35h: R-Squared [600]
		02:57:39	07:37:39	07:12:39	06:57:39	08:22:39	07:22:39	07:17:39	07:27:39	06:37:39	06:42:39	13:17:39	06:07:39	Pf_6n_35h: t at Max V [600]
		02:52:15	05:42:37	06:13:38	05:52:47	06:12:31	06:06:44	06:10:11	05:55:22	05:37:35	05:48:41	13:07:56	06:12:48	Pf_6n_35h: Lagtime [600]
		-0.03	5.05	11.04	8.32	4.99	10.75	10.47	7.04	11.89	13.49	0.03	0.03	Pf_3n_35h: Max V [600]
		0.964	0.999	0.988	0.999	0.995	0.983	0.99	0.991	0.996	0.988	0.965	0.964	Pf_3n_35h: R-Squared [600]
		20:25:09	07:40:09	07:15:09	07:00:09	08:25:09	07:25:09	07:25:09	07:35:09	06:40:09	06:45:09	21:20:09	01:25:09	Pf_3n_35h: t at Max V [600]
		19:52:56	05:53:37	06:33:33	06:03:02	06:40:53	06:31:29	06:33:19	06:24:11	05:56:39	06:10:09	21:09:02	01:26:16	Pf_3n_35h: Lagtime [600]
		-0.01	4.134	5.748	6.073	3.543	6.204	6.499	4.437	7.447	7.031	0.008	0.006	Pf_9n_35h: Max V [600]
		0.964	0.993	0.94	0.985	0.991	0.963	0.983	0.981	0.981	0.96	0.7	0.542	Pf_9n_35h: R-Squared [600]
		16:20:09	07:30:09	07:05:09	06:55:09	08:15:09	07:10:09	07:20:09	07:20:09	06:35:09	06:45:09	21:15:09	02:45:09	Pf_9n_35h: t at Max V [600]
		15:07:56	05:30:00	05:56:26	05:42:33	05:58:23	05:52:14	06:02:28	05:42:56	05:31:00	05:39:17	20:37:49	02:47:07	Pf_9n_35h: Lagtime [600]
	F	-0.06	5.84	2.72	3.82	4.82	2.8	7.74	9.38	4.14	4.14	-0.06	0.12	Max V [600]
		1	1	1	1	1	1	1	1	1	1	1	1	R-Squared [600]
		18:07:39	07:42:39	12:12:39	07:52:39	08:52:39	10:37:39	08:22:39	08:17:39	13:47:39	08:02:39	19:12:39	00:02:39	t at Max V [600]
		18:11:49	06:13:03	09:03:03	06:16:57	06:59:49	08:21:22	07:02:07	07:16:56	11:34:20	06:13:55	19:21:49	00:00:09	Lagtime [600]
		0.02	4.392	1.71	3.039	3.319	2.061	4.991	4.799	1.819	3.335	0.012	-0.011	Pf_6n_35h: Max V [600]
		0.745	0.988	0.991	0.998	0.994	0.992	0.982	0.96	0.96	0.995	0.663	0.779	Pf_6n_35h: R-Squared [600]
		02:52:39	07:32:39	11:32:39	08:32:39	08:47:39	11:22:39	07:32:39	08:12:39	11:42:39	08:12:39	23:12:39	14:47:39	Pf_6n_35h: t at Max V [600]
		02:50:09	05:47:19	07:12:34	06:04:45	06:11:57	07:38:25	06:09:47	06:20:42	08:09:59	05:50:33	23:00:09	14:44:44	Pf_6n_35h: Lagtime [600]
		0.05	5.64	2.01	3.45	3.69	2.62	6.29	6.87	2.86	3.6	-0.03	0.04	Pf_3n_35h: Max V [600]
		0.987	1	0.96	0.996	0.97	0.998	1	0.957	1	0.993	0.75	0.922	Pf_3n_35h: R-Squared [600]
		02:55:09	07:40:09	12:10:09	07:55:09	08:55:09	10:40:09	07:25:09	08:15:09	06:25:09	08:05:09	22:55:09	21:20:09	Pf_3n_35h: t at Max V [600]
		02:53:49	06:12:30	08:03:33	06:11:53	06:28:27	08:15:30	06:24:55	06:55:13	05:42:37	06:00:26	22:58:29	21:19:19	Pf_3n_35h: Lagtime [600]
		0.011	4.046	1.614	2.87	3.016	2.018	4.694	4.154	1.593	3.106	0.007	-0.007	Pf_9n_35h: Max V [600]
		0.642	0.991	0.993	0.998	0.994	0.996	0.991	0.973	0.973	0.994	0.612	0.517	Pf_9n_35h: R-Squared [600]
		02:55:09	07:35:09	11:15:09	08:30:09	08:40:09	11:15:09	07:35:09	08:05:09	11:50:09	08:05:09	02:55:09	22:05:09	Pf_9n_35h: t at Max V [600]
		02:49:16	05:38:38	06:57:07	05:55:54	05:56:01	07:33:30	06:04:23	06:02:55	07:40:05	05:39:56	02:26:35	22:03:29	Pf_9n_35h: Lagtime [600]
	G	-0.22	4.2	3.9	4.32	6.28	4.1	7.74	9.5	2.7	9.26	0.06	-0.14	Max V [600]
		1	1	1	1	1	1	1	1	1	1	1	1	R-Squared [600]
		02:57:39	08:42:39	09:22:39	05:07:39	09:12:39	10:22:39	07:17:39	07:12:39	11:27:39	08:17:39	14:32:39	09:12:39	t at Max V [600]
		02:55:09	06:50:15	07:53:29	04:36:16	07:47:02	08:48:27	06:30:11	06:29:26	09:11:58	07:17:13	14:43:29	09:14:26	Lagtime [600]
		-0.075	2.932	2.053	3.098	3.255	1.957	5.339	5.766	1.649	4.729	-0.01	0.023	Pf_6n_35h: Max V [600]
		0.855	0.997	0.96	0.992	0.967	0.954	0.986	0.987	0.993	0.988	0.604	0.895	Pf_6n_35h: R-Squared [600]
		02:57:39	08:12:39	09:17:39	07:42:39	09:07:39	10:22:39	07:22:39	07:17:39	11:52:39	07:47:39	22:17:39	08:57:39	Pf_6n_35h: t at Max V [600]
		02:45:51	06:02:53	06:36:44	05:44:20	06:28:45	07:11:46	06:10:38	06:02:48	07:59:44	06:15:38	20:53:35	09:18:17	Pf_6n_35h: Lagtime [600]
		-0.14	3.46	3.15	3.46	3.93	2.93	6.62	6.77	1.91	6.34	0.02	-0.06	Pf_3n_35h: Max V [600]
		0.902	0.985	0.981	0.994	0.894	0.95	0.991	0.949	0.977	0.934	1	0.75	Pf_3n_35h: R-Squared [600]
		03:00:09	08:40:09	09:25:09	07:50:09	09:15:09	10:20:09	07:20:09	07:15:09	11:55:09	08:15:09	13:00:09	05:45:09	Pf_3n_35h: t at Max V [600]
		02:52:03	06:29:26	07:35:43	05:57:35	06:57:33	08:14:00	06:23:57	06:13:36	08:31:54	06:50:16	13:20:09	05:38:29	Pf_3n_35h: Lagtime [600]
		-0.052	2.664	1.945	3.03	3.036	1.947	4.757	5.104	1.61	4.307	-0.008	-0.014	Pf_9n_35h: Max V [600]
		0.837	0.992	0.984	0.997	0.984	0.984	0.988	0.984	0.997	0.988	0.735	0.664	Pf_9n_35h: R-Squared [600]
		03:00:09	08:25:09	09:25:09	07:50:09	09:00:09	10:30:09	07:25:09	07:10:09	12:00:09	07:40:09	22:10:09	22:20:09	Pf_9n_35h: t at Max V [600]
		02:41:39	05:49:58	06:28:01	05:41:47	06:16:58	07:10:56	06:02:10	05:52:50	07:54:15	06:06:16	20:30:09	21:24:52	Pf_9n_35h: Lagtime [600]
	H	0.08	0.06	0.06	0.08	-0.06	0.06	-0.08	-0.06	0.06	0.08	-0.06	-0.1	Max V [600]
		1	1	1	1	1	1	1	1	1	1	1	1	R-Squared [600]
		02:57:39	12:07:39	20:57:39	02:57:39	22:27:39	05:52:39	21:27:39	21:02:39	02:57:39	02:57:39	04:07:39	09:12:39	t at Max V [600]
		02:57:39	12:25:09	21:26:49	03:07:39	22:21:49	06:08:29	21:21:24	21:00:09	02:55:09	03:13:54	04:13:29	09:08:09	Lagtime [600]
		0.014	-0.011	-0.025	0.017	0.011	-0.015	-0.014	-0.01	0.014	-0.018	0.022	-0.021	Pf_6n_35h: Max V [600]
		0.475	0.938	0.943	0.665	0.476	0.966	0.824	0.631	0.602	0.926	0.814	0.711	Pf_6n_35h: R-Squared [600]
		03:02:39	17:57:39	02:57:39	02:52:39	02:52:39	22:47:39	12:02:39	11:32:39	02:57:39	02:27:39	02:57:39	15:12:39	Pf_6n_35h: t at Max V [600]
		02:57:47	16:39:22	02:39:05	03:17:56	02:41:54	20:06:07	11:54:29	11:26:10	02:49:29	01:49:04	02:49:58	15:15:01	Pf_6n_35h: Lagtime [600]
		0.05	0.03	-0.04	0.04	-0.03	0.03	0.03	0.03	0.04	-0.03	0.04	-0.05	Pf_3n_35h: Max V [600]
		0.893	0.75	1	0.75	0.75	0.965	0.965	0.964	0.923	0.75	0.923	0.987	Pf_3n_35h: R-Squared [600]
		02:55:09	02:55:09	02:55:09	02:55:09	11:40:09	21:20:09	21:20:09	19:05:09	02:55:09	17:55:09	03:00:09	12:45:09	Pf_3n_35h: t at Max V [600]
		02:55:09	02:58:29	02:45:09	03:04:19	11:36:49	22:32:20	21:35:42	19:07:22	02:53:29	16:01:49	02:54:19	12:48:29	Pf_3n_35h: Lagtime [600]
		0.01	0.006	-0.017	0.009	0.007	-0.007	-0.012	0.006	0.01	-0.011	0.011	-0.011	Pf_9n_35h: Max V [600]
		0.579	0.419	0.868	0.525	0.492	0.672	0.851	0.471	0.675	0.692	0.577	0.635	Pf_9n_35h: R-Squared [600]
		03:00:09	02:55:09	02:50:09	03:00:09	02:45:09	18:05:09	12:10:09	12:00:09	02:50:09	03:20:09	02:50:09	07:30:09	Pf_9n_35h: t at Max V [600]
		02:55:33	03:13:40	02:28:09	03:41:49	02:33:29	13:55:09	11:53:00	12:09:57	02:44:36	02:03:23	02:38:42	07:31:12	Pf_9n_35h: Lagtime [600]
[truncated: 49 more columns]

## Sheet: labelled_data
		unused	unused	medium control	medium control	medium control	unused	unused	unused	unused	SBW25+pSXn	SBW25+pSXn-serTGA	SBW25+pSXn-serCGA	SBW25+pSXn	SBW25+pSXn-serTGA	SBW25+pSXn-serCGA	SBW25+pSXn	SBW25+pSXn-serTGA	SBW25+pSXn-serCGA	delserCGA1+pSXn	delserCGA1+pSXn-serTGA	delserCGA1+pSXn-serCGA	delserCGA1+pSXn	delserCGA1+pSXn-serTGA	delserCGA1+pSXn-serCGA	delserCGA1+pSXn	delserCGA1+pSXn-serTGA	delserCGA1+pSXn-serCGA	delserCGA2+pSXn	delserCGA2+pSXn-serTGA	delserCGA2+pSXn-serCGA	delserCGA2+pSXn	delserCGA2+pSXn-serTGA	delserCGA2+pSXn-serCGA	delserCGA2+pSXn	delserCGA2+pSXn-serTGA	delserCGA2+pSXn-serCGA	SBW25+pSXn-serCGA	SBW25+pSXn	SBW25+pSXn-serTGA	SBW25+pSXn-serCGA	SBW25+pSXn	SBW25+pSXn-serTGA	SBW25+pSXn-serCGA	SBW25+pSXn	SBW25+pSXn-serTGA	delserCGA1+pSXn-serCGA	delserCGA1+pSXn	delserCGA1+pSXn-serTGA
Time	T° 600	A2	A3	A4	A5	A6	A7	A8	A9	A10	B2	B3	B4	B5	B6	B7	B8	B9	B10	C2	C3	C4	C5	C6	C7	C8	C9	C10	D2	D3	D4	D5	D6	D7	D8	D9	D10	E2	E3	E4	E5	E6	E7	E8	E9	E10	F2	F3	F4
00:00:09	28.3	0.091	0.091	0.093	0.09	0.089	0.093	0.088	0.093	0.098	0.108	0.107	0.112	0.103	0.106	0.101	0.1	0.107	0.113	0.113	0.107	0.107	0.104	0.1	0.106	0.107	0.098	0.106	0.106	0.107	0.097	0.099	0.1	0.098	0.102	0.111	0.102	0.104	0.1	0.102	0.102	0.1	0.115	0.099	0.104	0.11	0.099	0.094	0.094
00:05:09	28.3	0.091	0.091	0.093	0.09	0.089	0.093	0.088	0.093	0.098	0.108	0.103	0.11	0.107	0.105	0.11	0.108	0.111	0.119	0.107	0.11	0.106	0.103	0.101	0.113	0.107	0.097	0.111	0.098	0.106	0.109	0.103	0.102	0.098	0.105	0.112	0.11	0.105	0.105	0.104	0.103	0.101	0.104	0.101	0.107	0.113	0.102	0.097	0.099
00:10:09	28.3	0.091	0.091	0.092	0.09	0.089	0.093	0.088	0.092	0.098	0.107	0.105	0.109	0.105	0.105	0.108	0.111	0.111	0.119	0.105	0.112	0.106	0.102	0.105	0.114	0.108	0.102	0.111	0.101	0.109	0.109	0.102	0.102	0.101	0.106	0.116	0.115	0.107	0.109	0.108	0.102	0.102	0.103	0.103	0.11	0.119	0.105	0.1	0.106
00:15:09	28.3	0.091	0.091	0.093	0.09	0.089	0.093	0.088	0.092	0.098	0.108	0.105	0.109	0.106	0.105	0.109	0.109	0.109	0.119	0.105	0.112	0.11	0.103	0.108	0.118	0.111	0.113	0.111	0.102	0.11	0.105	0.104	0.102	0.102	0.113	0.124	0.111	0.108	0.11	0.11	0.105	0.104	0.107	0.108	0.115	0.116	0.109	0.102	0.104
00:20:09	28.3	0.091	0.09	0.092	0.09	0.089	0.093	0.088	0.092	0.098	0.109	0.108	0.108	0.107	0.107	0.109	0.112	0.111	0.119	0.109	0.117	0.112	0.106	0.107	0.115	0.113	0.112	0.112	0.104	0.112	0.111	0.105	0.105	0.103	0.111	0.121	0.111	0.109	0.111	0.113	0.107	0.107	0.111	0.108	0.113	0.116	0.111	0.105	0.107
00:25:09	28.3	0.091	0.09	0.092	0.09	0.089	0.093	0.088	0.092	0.098	0.11	0.109	0.108	0.108	0.107	0.11	0.113	0.112	0.12	0.109	0.116	0.11	0.108	0.108	0.115	0.114	0.111	0.112	0.106	0.113	0.11	0.107	0.106	0.105	0.111	0.119	0.111	0.112	0.111	0.113	0.107	0.11	0.11	0.107	0.11	0.117	0.113	0.106	0.109
00:30:09	28.3	0.091	0.09	0.092	0.09	0.089	0.092	0.088	0.092	0.098	0.112	0.107	0.108	0.108	0.107	0.111	0.113	0.112	0.119	0.11	0.115	0.111	0.108	0.11	0.115	0.115	0.109	0.112	0.106	0.112	0.109	0.108	0.106	0.107	0.111	0.119	0.111	0.112	0.111	0.113	0.108	0.111	0.108	0.108	0.111	0.117	0.113	0.106	0.108
00:35:09	28.3	0.09	0.09	0.092	0.09	0.089	0.092	0.088	0.092	0.099	0.112	0.107	0.108	0.109	0.107	0.112	0.115	0.113	0.119	0.11	0.115	0.112	0.109	0.11	0.115	0.116	0.11	0.112	0.107	0.113	0.111	0.108	0.108	0.106	0.111	0.12	0.112	0.112	0.114	0.113	0.108	0.109	0.108	0.107	0.112	0.118	0.113	0.105	0.109
00:40:09	28.3	0.09	0.09	0.092	0.09	0.089	0.092	0.088	0.092	0.098	0.111	0.11	0.11	0.109	0.108	0.113	0.116	0.113	0.119	0.11	0.117	0.112	0.11	0.111	0.115	0.117	0.109	0.112	0.107	0.115	0.111	0.108	0.108	0.106	0.112	0.121	0.112	0.113	0.115	0.114	0.108	0.108	0.109	0.108	0.112	0.118	0.113	0.106	0.11
00:45:09	28.3	0.09	0.09	0.092	0.09	0.089	0.092	0.088	0.092	0.098	0.112	0.111	0.111	0.11	0.109	0.114	0.117	0.113	0.12	0.111	0.117	0.114	0.11	0.112	0.116	0.117	0.111	0.113	0.108	0.116	0.113	0.108	0.11	0.107	0.112	0.121	0.112	0.113	0.116	0.115	0.108	0.108	0.108	0.108	0.112	0.118	0.113	0.107	0.111
00:50:09	28.3	0.091	0.09	0.092	0.09	0.089	0.092	0.088	0.092	0.098	0.113	0.111	0.111	0.109	0.11	0.114	0.116	0.114	0.119	0.112	0.118	0.113	0.111	0.114	0.115	0.118	0.112	0.113	0.109	0.117	0.113	0.109	0.111	0.107	0.112	0.121	0.113	0.113	0.116	0.116	0.109	0.109	0.109	0.109	0.112	0.118	0.114	0.108	0.11
00:55:09	28.3	0.09	0.09	0.092	0.09	0.089	0.092	0.088	0.092	0.098	0.113	0.112	0.111	0.11	0.11	0.114	0.116	0.114	0.12	0.114	0.12	0.113	0.111	0.116	0.115	0.119	0.113	0.114	0.11	0.118	0.113	0.11	0.113	0.108	0.113	0.121	0.113	0.113	0.116	0.117	0.11	0.11	0.109	0.109	0.113	0.119	0.114	0.109	0.111
01:00:09	28.3	0.09	0.09	0.092	0.09	0.089	0.092	0.088	0.092	0.098	0.114	0.112	0.112	0.11	0.111	0.115	0.115	0.114	0.12	0.114	0.121	0.114	0.111	0.118	0.115	0.119	0.114	0.114	0.111	0.118	0.114	0.111	0.114	0.108	0.113	0.122	0.113	0.113	0.117	0.119	0.111	0.11	0.109	0.11	0.113	0.119	0.114	0.11	0.112
01:05:09	28.3	0.09	0.09	0.092	0.09	0.088	0.092	0.088	0.092	0.098	0.115	0.113	0.113	0.111	0.112	0.116	0.116	0.115	0.12	0.113	0.122	0.115	0.112	0.12	0.115	0.12	0.115	0.114	0.111	0.119	0.114	0.112	0.116	0.109	0.113	0.122	0.113	0.113	0.117	0.121	0.113	0.111	0.11	0.11	0.114	0.12	0.114	0.111	0.113
01:10:09	28.3	0.09	0.09	0.092	0.09	0.089	0.092	0.088	0.092	0.098	0.115	0.113	0.114	0.112	0.113	0.117	0.117	0.116	0.121	0.115	0.124	0.116	0.113	0.122	0.115	0.121	0.116	0.115	0.112	0.12	0.115	0.112	0.115	0.109	0.114	0.123	0.114	0.114	0.119	0.123	0.114	0.112	0.111	0.111	0.114	0.12	0.114	0.112	0.114
01:15:09	28.3	0.09	0.09	0.092	0.09	0.089	0.092	0.088	0.092	0.098	0.116	0.114	0.114	0.112	0.114	0.118	0.118	0.116	0.121	0.115	0.126	0.116	0.115	0.123	0.116	0.121	0.118	0.116	0.113	0.121	0.115	0.113	0.115	0.11	0.114	0.123	0.114	0.114	0.12	0.125	0.114	0.114	0.112	0.112	0.115	0.121	0.115	0.112	0.115
01:20:09	28.3	0.09	0.09	0.092	0.09	0.089	0.092	0.088	0.092	0.098	0.117	0.115	0.115	0.114	0.115	0.12	0.119	0.117	0.122	0.116	0.127	0.117	0.116	0.124	0.116	0.122	0.12	0.117	0.113	0.122	0.116	0.114	0.115	0.111	0.115	0.124	0.115	0.115	0.122	0.126	0.114	0.115	0.113	0.113	0.116	0.122	0.115	0.112	0.116
01:25:09	28.3	0.09	0.09	0.092	0.09	0.089	0.092	0.088	0.092	0.098	0.118	0.116	0.115	0.115	0.116	0.122	0.121	0.118	0.124	0.117	0.128	0.118	0.118	0.124	0.117	0.123	0.122	0.119	0.115	0.123	0.118	0.116	0.116	0.112	0.116	0.125	0.115	0.115	0.124	0.126	0.115	0.116	0.115	0.114	0.117	0.124	0.116	0.113	0.117
01:30:09	28.3	0.09	0.09	0.092	0.09	0.089	0.092	0.088	0.092	0.098	0.12	0.117	0.117	0.117	0.118	0.123	0.122	0.12	0.126	0.118	0.128	0.119	0.12	0.125	0.118	0.125	0.124	0.121	0.116	0.125	0.119	0.117	0.117	0.113	0.116	0.126	0.117	0.116	0.125	0.127	0.116	0.117	0.115	0.116	0.119	0.124	0.117	0.114	0.12
01:35:09	28.3	0.09	0.09	0.092	0.09	0.089	0.092	0.088	0.092	0.098	0.122	0.118	0.118	0.119	0.12	0.124	0.124	0.122	0.128	0.119	0.128	0.121	0.121	0.126	0.119	0.126	0.127	0.122	0.117	0.126	0.121	0.119	0.119	0.114	0.117	0.128	0.118	0.117	0.125	0.127	0.118	0.118	0.116	0.118	0.121	0.125	0.118	0.116	0.122
01:40:09	28.3	0.09	0.09	0.092	0.09	0.089	0.092	0.088	0.092	0.098	0.125	0.121	0.12	0.121	0.121	0.125	0.124	0.123	0.129	0.12	0.129	0.123	0.123	0.128	0.121	0.127	0.129	0.123	0.118	0.126	0.122	0.121	0.12	0.116	0.118	0.129	0.12	0.119	0.126	0.128	0.119	0.118	0.117	0.12	0.121	0.126	0.12	0.117	0.125
01:45:09	28.3	0.09	0.09	0.092	0.09	0.089	0.092	0.088	0.092	0.098	0.128	0.123	0.122	0.122	0.122	0.125	0.126	0.125	0.131	0.122	0.13	0.124	0.123	0.13	0.122	0.129	0.132	0.125	0.12	0.127	0.123	0.122	0.12	0.117	0.119	0.13	0.122	0.122	0.126	0.128	0.12	0.12	0.118	0.121	0.122	0.129	0.122	0.119	0.127
01:50:09	28.3	0.09	0.09	0.092	0.09	0.089	0.092	0.088	0.092	0.098	0.132	0.126	0.124	0.124	0.124	0.127	0.129	0.127	0.133	0.124	0.13	0.125	0.124	0.133	0.124	0.13	0.135	0.128	0.123	0.128	0.124	0.123	0.122	0.118	0.12	0.132	0.124	0.125	0.126	0.129	0.121	0.122	0.12	0.124	0.125	0.131	0.124	0.121	0.13
01:55:09	28.3	0.09	0.09	0.092	0.09	0.089	0.092	0.088	0.092	0.098	0.137	0.129	0.126	0.127	0.127	0.13	0.132	0.13	0.135	0.127	0.13	0.126	0.124	0.134	0.126	0.131	0.138	0.13	0.127	0.13	0.125	0.124	0.123	0.119	0.122	0.133	0.126	0.128	0.128	0.13	0.122	0.124	0.121	0.127	0.128	0.134	0.127	0.122	0.133
02:00:09	28.3	0.09	0.09	0.092	0.09	0.089	0.092	0.088	0.092	0.098	0.139	0.132	0.129	0.131	0.13	0.134	0.135	0.134	0.138	0.128	0.135	0.129	0.125	0.134	0.127	0.132	0.142	0.132	0.131	0.131	0.127	0.125	0.124	0.12	0.125	0.135	0.128	0.131	0.129	0.133	0.124	0.126	0.123	0.131	0.132	0.136	0.132	0.123	0.137
02:05:09	28.3	0.09	0.09	0.092	0.09	0.089	0.092	0.088	0.092	0.098	0.137	0.136	0.133	0.136	0.134	0.139	0.138	0.137	0.141	0.129	0.136	0.132	0.126	0.132	0.129	0.132	0.143	0.136	0.135	0.133	0.13	0.126	0.125	0.122	0.125	0.137	0.13	0.132	0.131	0.134	0.126	0.129	0.125	0.135	0.137	0.139	0.134	0.125	0.138
02:10:09	28.3	0.09	0.09	0.092	0.09	0.089	0.092	0.088	0.092	0.098	0.134	0.14	0.136	0.138	0.137	0.141	0.14	0.138	0.143	0.131	0.139	0.134	0.127	0.13	0.132	0.133	0.142	0.138	0.137	0.134	0.133	0.127	0.126	0.123	0.127	0.139	0.133	0.131	0.133	0.135	0.13	0.135	0.127	0.139	0.141	0.141	0.136	0.126	0.134
02:15:09	28.3	0.09	0.09	0.092	0.09	0.089	0.092	0.088	0.092	0.098	0.133	0.142	0.141	0.134	0.137	0.137	0.139	0.139	0.146	0.138	0.142	0.134	0.126	0.132	0.135	0.134	0.14	0.14	0.139	0.134	0.135	0.128	0.13	0.125	0.128	0.142	0.138	0.13	0.135	0.136	0.133	0.137	0.13	0.14	0.143	0.145	0.135	0.129	0.131
02:20:09	28.3	0.09	0.09	0.092	0.09	0.089	0.092	0.088	0.092	0.098	0.134	0.141	0.141	0.129	0.135	0.135	0.138	0.138	0.148	0.142	0.145	0.132	0.127	0.131	0.14	0.136	0.14	0.14	0.14	0.135	0.133	0.129	0.136	0.128	0.13	0.146	0.142	0.13	0.137	0.138	0.131	0.136	0.132	0.141	0.143	0.148	0.131	0.131	0.133
02:25:09	28.3	0.09	0.09	0.092	0.09	0.088	0.092	0.088	0.092	0.098	0.135	0.142	0.138	0.131	0.134	0.134	0.14	0.14	0.149	0.144	0.147	0.131	0.127	0.134	0.142	0.137	0.142	0.141	0.141	0.137	0.13	0.13	0.136	0.133	0.131	0.147	0.144	0.131	0.14	0.14	0.128	0.134	0.136	0.141	0.141	0.151	0.13	0.133	0.135
02:30:09	28.3	0.09	0.09	0.092	0.09	0.089	0.092	0.088	0.092	0.098	0.138	0.139	0.135	0.135	0.132	0.136	0.139	0.139	0.148	0.146	0.15	0.132	0.128	0.135	0.143	0.139	0.14	0.14	0.142	0.139	0.132	0.129	0.135	0.137	0.132	0.149	0.148	0.134	0.142	0.142	0.128	0.132	0.139	0.14	0.14	0.152	0.135	0.134	0.137
02:35:09	28.3	0.09	0.09	0.092	0.09	0.089	0.092	0.088	0.092	0.098	0.14	0.136	0.134	0.139	0.135	0.14	0.142	0.141	0.148	0.145	0.152	0.133	0.13	0.137	0.143	0.14	0.138	0.141	0.14	0.14	0.135	0.129	0.135	0.139	0.133	0.15	0.148	0.136	0.146	0.146	0.128	0.132	0.14	0.14	0.141	0.15	0.136	0.13	0.139
02:40:09	28.3	0.09	0.09	0.092	0.09	0.089	0.092	0.088	0.092	0.098	0.141	0.136	0.135	0.141	0.138	0.147	0.144	0.144	0.149	0.143	0.154	0.134	0.131	0.138	0.143	0.144	0.138	0.142	0.141	0.14	0.138	0.13	0.134	0.139	0.135	0.15	0.146	0.138	0.149	0.15	0.13	0.132	0.139	0.136	0.143	0.151	0.137	0.129	0.141
02:45:09	28.3	0.09	0.09	0.092	0.09	0.089	0.092	0.088	0.092	0.098	0.139	0.137	0.136	0.143	0.14	0.149	0.145	0.145	0.15	0.14	0.155	0.136	0.133	0.14	0.141	0.146	0.138	0.145	0.143	0.142	0.14	0.133	0.133	0.138	0.138	0.149	0.144	0.141	0.151	0.154	0.133	0.135	0.138	0.137	0.145	0.153	0.141	0.131	0.141
02:50:09	28.3	0.09	0.09	0.092	0.09	0.089	0.092	0.088	0.092	0.098	0.141	0.14	0.138	0.143	0.142	0.152	0.148	0.148	0.153	0.135	0.157	0.138	0.134	0.141	0.141	0.15	0.137	0.148	0.14	0.145	0.141	0.135	0.134	0.137	0.14	0.148	0.143	0.144	0.155	0.156	0.135	0.137	0.138	0.138	0.146	0.155	0.145	0.133	0.142
02:55:09	28.3	0.09	0.09	0.092	0.09	0.089	0.092	0.088	0.092	0.098	0.147	0.142	0.141	0.143	0.147	0.155	0.151	0.151	0.155	0.135	0.158	0.14	0.136	0.143	0.142	0.15	0.138	0.151	0.14	0.145	0.143	0.137	0.137	0.139	0.144	0.151	0.145	0.146	0.157	0.157	0.138	0.14	0.139	0.14	0.151	0.158	0.147	0.136	0.143
03:00:09	28.3	0.09	0.09	0.092	0.09	0.089	0.092	0.089	0.092	0.098	0.152	0.143	0.144	0.145	0.151	0.156	0.153	0.152	0.157	0.137	0.16	0.145	0.137	0.144	0.143	0.148	0.139	0.154	0.14	0.147	0.147	0.139	0.139	0.139	0.146	0.151	0.146	0.15	0.16	0.16	0.141	0.142	0.14	0.143	0.154	0.16	0.15	0.137	0.143
03:05:09	28.3	0.09	0.09	0.092	0.09	0.089	0.092	0.088	0.092	0.098	0.155	0.145	0.144	0.15	0.155	0.159	0.156	0.155	0.16	0.138	0.162	0.149	0.138	0.145	0.144	0.147	0.142	0.157	0.138	0.152	0.15	0.141	0.141	0.14	0.148	0.153	0.148	0.153	0.162	0.162	0.143	0.144	0.139	0.146	0.156	0.161	0.154	0.139	0.145
03:10:09	28.3	0.09	0.09	0.092	0.09	0.089	0.092	0.088	0.092	0.098	0.157	0.146	0.148	0.155	0.158	0.164	0.161	0.158	0.165	0.139	0.164	0.152	0.139	0.148	0.148	0.148	0.146	0.162	0.138	0.154	0.153	0.143	0.143	0.138	0.147	0.159	0.152	0.156	0.164	0.165	0.145	0.147	0.141	0.149	0.161	0.163	0.158	0.141	0.148
03:15:09	28.3	0.09	0.09	0.092	0.09	0.089	0.092	0.088	0.092	0.098	0.16	0.148	0.151	0.158	0.159	0.166	0.162	0.161	0.167	0.139	0.166	0.152	0.14	0.149	0.149	0.147	0.15	0.164	0.138	0.157	0.155	0.144	0.145	0.14	0.147	0.157	0.153	0.159	0.166	0.167	0.147	0.149	0.145	0.15	0.162	0.164	0.162	0.143	0.149
03:20:09	28.3	0.09	0.09	0.092	0.09	0.089	0.092	0.088	0.092	0.098	0.163	0.149	0.152	0.157	0.162	0.167	0.163	0.164	0.17	0.141	0.168	0.154	0.142	0.151	0.152	0.147	0.149	0.168	0.139	0.16	0.158	0.144	0.147	0.142	0.148	0.159	0.157	0.164	0.169	0.17	0.15	0.152	0.145	0.154	0.163	0.169	0.165	0.144	0.151
03:25:09	28.3	0.09	0.09	0.092	0.09	0.089	0.092	0.088	0.092	0.098	0.166	0.148	0.151	0.161	0.164	0.171	0.167	0.167	0.175	0.143	0.17	0.155	0.144	0.154	0.155	0.149	0.153	0.17	0.142	0.162	0.161	0.145	0.149	0.146	0.146	0.162	0.16	0.166	0.171	0.172	0.153	0.155	0.148	0.157	0.167	0.172	0.167	0.147	0.153
03:30:09	28.3	0.09	0.09	0.092	0.09	0.089	0.092	0.088	0.092	0.098	0.169	0.149	0.149	0.164	0.166	0.173	0.169	0.17	0.177	0.144	0.172	0.155	0.145	0.157	0.158	0.151	0.152	0.173	0.142	0.165	0.163	0.146	0.151	0.152	0.143	0.165	0.164	0.168	0.173	0.175	0.156	0.158	0.15	0.159	0.171	0.176	0.171	0.148	0.156
03:35:09	28.3	0.09	0.09	0.092	0.09	0.089	0.092	0.088	0.092	0.098	0.171	0.151	0.157	0.168	0.169	0.175	0.171	0.173	0.18	0.146	0.174	0.156	0.147	0.159	0.162	0.15	0.153	0.176	0.143	0.167	0.166	0.147	0.153	0.158	0.143	0.167	0.166	0.17	0.176	0.177	0.159	0.161	0.152	0.163	0.173	0.175	0.173	0.15	0.159
03:40:09	28.3	0.09	0.09	0.092	0.09	0.089	0.092	0.088	0.092	0.098	0.174	0.154	0.161	0.171	0.17	0.177	0.173	0.176	0.181	0.148	0.175	0.159	0.148	0.162	0.163	0.153	0.155	0.177	0.144	0.169	0.168	0.149	0.156	0.161	0.144	0.167	0.171	0.173	0.179	0.18	0.161	0.163	0.156	0.166	0.176	0.174	0.176	0.151	0.162
03:45:09	28.3	0.09	0.09	0.092	0.09	0.089	0.092	0.088	0.092	0.098	0.177	0.16	0.163	0.174	0.174	0.18	0.176	0.177	0.187	0.148	0.178	0.16	0.15	0.163	0.167	0.156	0.157	0.185	0.147	0.171	0.171	0.151	0.158	0.164	0.148	0.171	0.173	0.175	0.181	0.183	0.164	0.166	0.157	0.169	0.181	0.177	0.178	0.153	0.164
03:50:09	28.3	0.09	0.09	0.092	0.09	0.089	0.092	0.088	0.092	0.098	0.18	0.165	0.163	0.177	0.176	0.183	0.182	0.178	0.192	0.149	0.18	0.162	0.151	0.168	0.167	0.156	0.159	0.183	0.149	0.172	0.173	0.153	0.161	0.166	0.153	0.172	0.176	0.178	0.184	0.186	0.167	0.169	0.163	0.172	0.183	0.18	0.181	0.155	0.167
03:55:09	28.3	0.09	0.09	0.092	0.09	0.089	0.092	0.088	0.092	0.098	0.183	0.168	0.169	0.179	0.178	0.185	0.184	0.185	0.194	0.149	0.183	0.166	0.152	0.168	0.17	0.161	0.162	0.188	0.151	0.175	0.175	0.154	0.163	0.161	0.152	0.175	0.179	0.181	0.187	0.189	0.17	0.172	0.167	0.175	0.186	0.183	0.184	0.157	0.169
04:00:09	28.3	0.09	0.09	0.092	0.09	0.089	0.092	0.088	0.092	0.098	0.186	0.17	0.173	0.182	0.181	0.193	0.19	0.186	0.196	0.154	0.185	0.169	0.154	0.176	0.174	0.164	0.165	0.194	0.153	0.178	0.179	0.156	0.166	0.163	0.151	0.178	0.184	0.184	0.19	0.193	0.173	0.175	0.165	0.18	0.192	0.188	0.187	0.158	0.172
04:05:09	28.3	0.09	0.09	0.092	0.09	0.089	0.092	0.088	0.092	0.098	0.189	0.172	0.175	0.186	0.182	0.193	0.196	0.185	0.201	0.155	0.188	0.174	0.156	0.175	0.177	0.168	0.169	0.198	0.155	0.18	0.182	0.157	0.169	0.166	0.152	0.179	0.187	0.187	0.193	0.196	0.176	0.177	0.175	0.184	0.194	0.192	0.189	0.16	0.175
04:10:09	28.3	0.09	0.09	0.092	0.09	0.089	0.092	0.088	0.092	0.098	0.191	0.175	0.177	0.188	0.187	0.198	0.198	0.193	0.203	0.155	0.19	0.177	0.156	0.183	0.179	0.171	0.173	0.2	0.157	0.183	0.184	0.158	0.171	0.169	0.154	0.183	0.19	0.19	0.196	0.199	0.179	0.18	0.173	0.187	0.199	0.196	0.193	0.162	0.177
04:15:09	28.3	0.09	0.09	0.092	0.09	0.089	0.092	0.088	0.092	0.098	0.195	0.181	0.181	0.191	0.19	0.202	0.203	0.194	0.205	0.157	0.193	0.18	0.159	0.182	0.182	0.171	0.177	0.202	0.159	0.186	0.188	0.16	0.174	0.173	0.156	0.183	0.194	0.194	0.2	0.203	0.184	0.184	0.179	0.193	0.203	0.2	0.197	0.165	0.181
04:20:09	28.3	0.09	0.09	0.092	0.09	0.089	0.092	0.088	0.092	0.098	0.198	0.185	0.184	0.194	0.195	0.206	0.208	0.197	0.209	0.16	0.196	0.183	0.162	0.189	0.185	0.174	0.181	0.209	0.161	0.189	0.19	0.163	0.177	0.178	0.159	0.188	0.197	0.197	0.204	0.207	0.187	0.188	0.181	0.197	0.206	0.204	0.2	0.167	0.183
04:25:09	28.3	0.09	0.09	0.092	0.09	0.089	0.092	0.088	0.092	0.098	0.201	0.188	0.186	0.197	0.199	0.209	0.212	0.2	0.214	0.162	0.199	0.186	0.164	0.194	0.189	0.177	0.185	0.213	0.163	0.192	0.194	0.166	0.18	0.183	0.171	0.191	0.204	0.2	0.207	0.211	0.191	0.192	0.187	0.201	0.21	0.209	0.203	0.169	0.186
04:30:09	28.3	0.09	0.09	0.092	0.09	0.089	0.092	0.088	0.092	0.098	0.204	0.192	0.188	0.2	0.202	0.212	0.224	0.205	0.222	0.166	0.201	0.188	0.166	0.199	0.192	0.178	0.19	0.219	0.167	0.195	0.197	0.17	0.183	0.187	0.162	0.194	0.212	0.204	0.211	0.215	0.194	0.195	0.187	0.204	0.218	0.213	0.207	0.171	0.19
04:35:09	28.3	0.09	0.09	0.092	0.09	0.089	0.092	0.088	0.092	0.098	0.209	0.197	0.192	0.204	0.207	0.219	0.23	0.208	0.223	0.169	0.205	0.191	0.171	0.203	0.196	0.183	0.194	0.223	0.168	0.198	0.2	0.175	0.187	0.188	0.165	0.197	0.213	0.208	0.214	0.219	0.198	0.199	0.192	0.21	0.222	0.219	0.21	0.174	0.193
04:40:09	28.3	0.09	0.09	0.092	0.09	0.089	0.092	0.088	0.092	0.098	0.213	0.202	0.196	0.209	0.213	0.224	0.235	0.213	0.229	0.172	0.207	0.194	0.173	0.207	0.2	0.186	0.199	0.23	0.17	0.201	0.203	0.179	0.19	0.192	0.171	0.203	0.213	0.211	0.218	0.223	0.2	0.203	0.193	0.215	0.228	0.224	0.214	0.175	0.196
04:45:09	28.3	0.09	0.09	0.092	0.09	0.089	0.092	0.088	0.092	0.098	0.218	0.207	0.2	0.216	0.22	0.23	0.242	0.218	0.233	0.175	0.212	0.197	0.177	0.211	0.204	0.19	0.203	0.233	0.171	0.204	0.206	0.183	0.193	0.194	0.176	0.202	0.221	0.215	0.223	0.228	0.204	0.208	0.201	0.221	0.236	0.231	0.218	0.178	0.199
04:50:09	28.3	0.09	0.09	0.092	0.09	0.089	0.092	0.088	0.092	0.098	0.222	0.21	0.203	0.222	0.226	0.238	0.248	0.225	0.241	0.178	0.215	0.201	0.181	0.215	0.21	0.195	0.209	0.242	0.175	0.207	0.21	0.186	0.196	0.199	0.177	0.208	0.227	0.22	0.227	0.233	0.208	0.213	0.207	0.227	0.245	0.238	0.223	0.181	0.203
04:55:09	28.3	0.09	0.09	0.092	0.09	0.089	0.092	0.088	0.092	0.098	0.227	0.216	0.206	0.226	0.231	0.243	0.251	0.229	0.248	0.182	0.218	0.204	0.183	0.219	0.213	0.197	0.213	0.246	0.18	0.211	0.214	0.189	0.2	0.208	0.178	0.21	0.234	0.225	0.232	0.237	0.211	0.218	0.209	0.232	0.251	0.245	0.227	0.184	0.208
05:00:09	28.3	0.09	0.09	0.092	0.09	0.089	0.092	0.088	0.092	0.098	0.234	0.224	0.21	0.231	0.237	0.25	0.257	0.235	0.253	0.185	0.222	0.208	0.187	0.224	0.22	0.201	0.22	0.254	0.185	0.215	0.218	0.192	0.204	0.205	0.181	0.216	0.241	0.23	0.236	0.243	0.215	0.224	0.213	0.238	0.258	0.252	0.232	0.188	0.213
05:05:09	28.3	0.09	0.09	0.092	0.09	0.089	0.092	0.088	0.092	0.098	0.239	0.23	0.216	0.238	0.244	0.256	0.264	0.244	0.262	0.185	0.225	0.212	0.191	0.23	0.225	0.206	0.225	0.261	0.191	0.218	0.223	0.196	0.209	0.213	0.185	0.222	0.248	0.236	0.241	0.25	0.219	0.23	0.221	0.245	0.267	0.26	0.237	0.191	0.218
05:10:09	28.3	0.09	0.09	0.092	0.09	0.089	0.092	0.088	0.092	0.098	0.245	0.233	0.22	0.243	0.248	0.266	0.269	0.25	0.274	0.188	0.232	0.217	0.194	0.234	0.229	0.21	0.23	0.278	0.194	0.222	0.227	0.199	0.212	0.216	0.193	0.222	0.254	0.242	0.246	0.256	0.222	0.234	0.225	0.252	0.273	0.268	0.24	0.193	0.222
05:15:09	28.3	0.09	0.09	0.092	0.09	0.089	0.092	0.088	0.092	0.098	0.253	0.239	0.225	0.249	0.254	0.275	0.276	0.258	0.279	0.192	0.234	0.222	0.197	0.24	0.236	0.213	0.238	0.284	0.198	0.226	0.231	0.202	0.217	0.223	0.183	0.228	0.263	0.248	0.251	0.26	0.227	0.242	0.232	0.258	0.279	0.275	0.246	0.196	0.225
05:20:09	28.3	0.09	0.09	0.092	0.09	0.089	0.092	0.088	0.092	0.098	0.262	0.247	0.229	0.255	0.262	0.283	0.285	0.267	0.291	0.194	0.238	0.226	0.2	0.246	0.243	0.217	0.244	0.294	0.202	0.23	0.236	0.205	0.221	0.229	0.194	0.234	0.271	0.252	0.257	0.268	0.234	0.248	0.238	0.264	0.286	0.284	0.252	0.199	0.231
05:25:09	28.3	0.09	0.09	0.092	0.09	0.089	0.092	0.088	0.092	0.098	0.268	0.253	0.234	0.261	0.27	0.296	0.304	0.275	0.306	0.2	0.244	0.231	0.202	0.254	0.247	0.22	0.251	0.304	0.206	0.234	0.24	0.208	0.224	0.234	0.202	0.236	0.282	0.262	0.26	0.278	0.238	0.253	0.244	0.27	0.294	0.292	0.257	0.201	0.238
05:30:09	28.3	0.09	0.09	0.092	0.09	0.089	0.092	0.088	0.092	0.098	0.276	0.257	0.24	0.268	0.281	0.305	0.309	0.283	0.311	0.204	0.247	0.235	0.205	0.266	0.253	0.223	0.258	0.31	0.21	0.238	0.245	0.21	0.228	0.239	0.203	0.239	0.29	0.266	0.268	0.287	0.242	0.258	0.25	0.276	0.302	0.296	0.263	0.204	0.244
05:35:09	28.3	0.09	0.09	0.092	0.09	0.089	0.092	0.088	0.092	0.098	0.281	0.265	0.247	0.278	0.292	0.312	0.322	0.292	0.321	0.207	0.252	0.24	0.206	0.271	0.264	0.228	0.264	0.319	0.214	0.243	0.251	0.214	0.232	0.247	0.206	0.247	0.3	0.273	0.275	0.295	0.251	0.263	0.257	0.283	0.317	0.312	0.269	0.208	0.252
05:40:09	28.3	0.09	0.09	0.092	0.09	0.089	0.092	0.088	0.092	0.098	0.288	0.274	0.251	0.287	0.305	0.323	0.338	0.302	0.328	0.211	0.256	0.245	0.209	0.275	0.277	0.233	0.27	0.326	0.217	0.247	0.254	0.217	0.237	0.252	0.21	0.26	0.308	0.283	0.282	0.303	0.26	0.27	0.263	0.289	0.331	0.323	0.276	0.21	0.254
05:45:09	28.3	0.09	0.09	0.092	0.09	0.089	0.092	0.088	0.092	0.098	0.299	0.279	0.258	0.296	0.313	0.324	0.355	0.307	0.333	0.216	0.267	0.253	0.212	0.284	0.286	0.236	0.278	0.332	0.221	0.252	0.263	0.219	0.245	0.258	0.214	0.274	0.319	0.291	0.294	0.314	0.265	0.28	0.27	0.297	0.346	0.338	0.284	0.213	0.267
05:50:09	28.3	0.09	0.09	0.092	0.09	0.089	0.092	0.088	0.092	0.097	0.314	0.287	0.268	0.307	0.322	0.336	0.368	0.318	0.342	0.22	0.278	0.256	0.214	0.291	0.293	0.241	0.284	0.34	0.225	0.255	0.267	0.222	0.259	0.265	0.217	0.28	0.327	0.31	0.301	0.329	0.271	0.288	0.277	0.308	0.359	0.343	0.302	0.216	0.269
05:55:09	28.3	0.09	0.09	0.092	0.09	0.089	0.092	0.088	0.092	0.098	0.339	0.295	0.283	0.321	0.332	0.347	0.382	0.331	0.351	0.224	0.278	0.267	0.217	0.297	0.299	0.249	0.294	0.347	0.231	0.263	0.283	0.228	0.264	0.278	0.221	0.287	0.334	0.304	0.313	0.344	0.278	0.298	0.284	0.317	0.374	0.35	0.303	0.218	0.283
06:00:09	28.3	0.09	0.09	0.092	0.09	0.089	0.092	0.088	0.092	0.098	0.381	0.304	0.287	0.337	0.344	0.358	0.394	0.345	0.366	0.228	0.285	0.275	0.224	0.301	0.306	0.254	0.302	0.354	0.237	0.272	0.291	0.234	0.27	0.29	0.226	0.29	0.343	0.316	0.321	0.365	0.286	0.308	0.296	0.326	0.392	0.362	0.322	0.222	0.287
06:05:09	28.3	0.09	0.09	0.092	0.09	0.089	0.092	0.088	0.092	0.098	0.406	0.313	0.297	0.349	0.357	0.371	0.401	0.357	0.375	0.232	0.291	0.283	0.23	0.306	0.309	0.259	0.309	0.362	0.249	0.281	0.301	0.239	0.275	0.294	0.228	0.298	0.351	0.333	0.333	0.386	0.296	0.322	0.304	0.337	0.408	0.376	0.328	0.224	0.292
06:10:09	28.3	0.09	0.09	0.092	0.09	0.089	0.092	0.088	0.092	0.097	0.415	0.324	0.301	0.366	0.371	0.383	0.414	0.379	0.392	0.237	0.301	0.299	0.243	0.314	0.319	0.279	0.313	0.373	0.252	0.289	0.318	0.245	0.283	0.302	0.232	0.301	0.36	0.334	0.347	0.398	0.304	0.344	0.317	0.349	0.425	0.393	0.334	0.228	0.303
06:15:09	28.3	0.09	0.09	0.092	0.09	0.089	0.092	0.088	0.092	0.098	0.418	0.337	0.316	0.382	0.384	0.396	0.436	0.395	0.403	0.243	0.308	0.309	0.242	0.317	0.323	0.28	0.321	0.382	0.255	0.295	0.319	0.254	0.289	0.308	0.236	0.303	0.37	0.352	0.361	0.407	0.312	0.357	0.328	0.358	0.456	0.408	0.358	0.231	0.308
06:20:09	28.3	0.09	0.09	0.092	0.09	0.089	0.092	0.088	0.092	0.097	0.426	0.353	0.319	0.393	0.395	0.402	0.46	0.408	0.416	0.247	0.321	0.317	0.246	0.322	0.327	0.287	0.328	0.392	0.263	0.304	0.329	0.257	0.294	0.317	0.239	0.305	0.383	0.378	0.373	0.417	0.32	0.371	0.343	0.366	0.485	0.423	0.365	0.234	0.319
06:25:09	28.3	0.09	0.09	0.092	0.09	0.089	0.092	0.088	0.092	0.097	0.449	0.379	0.333	0.41	0.417	0.418	0.486	0.431	0.435	0.257	0.325	0.325	0.252	0.329	0.336	0.292	0.334	0.404	0.266	0.305	0.339	0.262	0.301	0.324	0.245	0.309	0.397	0.393	0.381	0.422	0.328	0.38	0.357	0.376	0.505	0.452	0.378	0.237	0.324
06:30:09	28.3	0.09	0.09	0.092	0.09	0.089	0.092	0.088	0.092	0.097	0.469	0.398	0.344	0.422	0.43	0.429	0.51	0.451	0.447	0.268	0.338	0.331	0.259	0.337	0.345	0.296	0.342	0.417	0.276	0.316	0.349	0.268	0.304	0.336	0.254	0.313	0.412	0.406	0.389	0.439	0.332	0.389	0.372	0.378	0.544	0.476	0.39	0.242	0.324
06:35:09	28.3	0.09	0.09	0.092	0.09	0.089	0.092	0.088	0.092	0.097	0.488	0.423	0.359	0.438	0.459	0.443	0.534	0.473	0.468	0.271	0.346	0.343	0.263	0.343	0.353	0.3	0.349	0.431	0.28	0.32	0.36	0.276	0.311	0.342	0.271	0.318	0.432	0.411	0.401	0.452	0.343	0.405	0.388	0.384	0.569	0.493	0.397	0.248	0.333
06:40:09	28.3	0.09	0.09	0.092	0.09	0.089	0.092	0.088	0.092	0.097	0.515	0.445	0.371	0.458	0.486	0.463	0.566	0.501	0.491	0.275	0.353	0.355	0.268	0.35	0.366	0.306	0.357	0.443	0.289	0.327	0.369	0.282	0.317	0.351	0.274	0.323	0.46	0.428	0.41	0.467	0.353	0.422	0.405	0.393	0.635	0.528	0.409	0.258	0.339
06:45:09	28.3	0.09	0.09	0.092	0.09	0.089	0.092	0.088	0.092	0.097	0.548	0.47	0.384	0.477	0.516	0.486	0.61	0.533	0.512	0.288	0.363	0.364	0.272	0.355	0.376	0.312	0.367	0.456	0.287	0.334	0.38	0.284	0.322	0.358	0.28	0.328	0.499	0.44	0.421	0.492	0.358	0.439	0.423	0.409	0.688	0.583	0.421	0.262	0.346
06:50:09	28.3	0.09	0.09	0.092	0.09	0.089	0.092	0.088	0.092	0.097	0.584	0.498	0.4	0.494	0.534	0.509	0.661	0.561	0.528	0.305	0.372	0.374	0.275	0.358	0.382	0.314	0.374	0.469	0.302	0.344	0.389	0.285	0.325	0.371	0.286	0.331	0.532	0.447	0.43	0.518	0.367	0.457	0.443	0.425	0.693	0.663	0.428	0.265	0.35
06:55:09	28.3	0.09	0.09	0.092	0.09	0.089	0.092	0.088	0.092	0.097	0.632	0.532	0.409	0.516	0.561	0.531	0.672	0.613	0.556	0.303	0.378	0.387	0.278	0.369	0.397	0.319	0.383	0.506	0.296	0.347	0.4	0.288	0.332	0.379	0.291	0.335	0.558	0.466	0.451	0.554	0.378	0.516	0.467	0.44	0.745	0.653	0.441	0.269	0.362
07:00:09	28.3	0.09	0.09	0.092	0.09	0.089	0.092	0.088	0.092	0.097	0.662	0.566	0.421	0.538	0.577	0.55	0.681	0.66	0.573	0.318	0.385	0.398	0.284	0.378	0.407	0.32	0.396	0.519	0.316	0.354	0.408	0.299	0.336	0.388	0.292	0.341	0.593	0.489	0.464	0.593	0.389	0.547	0.486	0.458	0.691	0.681	0.453	0.279	0.374
07:05:09	28.3	0.09	0.09	0.092	0.09	0.089	0.092	0.088	0.092	0.097	0.691	0.592	0.433	0.554	0.597	0.564	0.696	0.681	0.59	0.322	0.392	0.405	0.287	0.387	0.417	0.324	0.403	0.533	0.301	0.357	0.415	0.302	0.34	0.398	0.298	0.344	0.606	0.515	0.487	0.637	0.399	0.572	0.518	0.477	0.645	0.712	0.474	0.283	0.378
07:10:09	28.3	0.09	0.09	0.092	0.09	0.089	0.092	0.088	0.092	0.097	0.681	0.619	0.439	0.574	0.636	0.583	0.686	0.686	0.614	0.324	0.395	0.41	0.291	0.396	0.425	0.33	0.404	0.548	0.315	0.363	0.419	0.303	0.344	0.41	0.305	0.35	0.617	0.53	0.524	0.659	0.408	0.582	0.544	0.499	0.642	0.723	0.49	0.292	0.387
07:15:09	28.3	0.09	0.09	0.092	0.09	0.089	0.092	0.088	0.092	0.097	0.682	0.665	0.452	0.605	0.68	0.603	0.687	0.7	0.659	0.333	0.403	0.418	0.297	0.408	0.439	0.334	0.417	0.577	0.319	0.371	0.426	0.311	0.35	0.422	0.309	0.358	0.647	0.554	0.569	0.671	0.42	0.609	0.582	0.52	0.644	0.681	0.505	0.295	0.392
07:20:09	28.3	0.09	0.09	0.092	0.09	0.089	0.092	0.088	0.092	0.097	0.649	0.681	0.471	0.643	0.713	0.622	0.686	0.695	0.69	0.344	0.409	0.426	0.303	0.414	0.452	0.341	0.419	0.592	0.334	0.386	0.438	0.317	0.361	0.435	0.315	0.363	0.657	0.566	0.635	0.641	0.433	0.638	0.603	0.53	0.648	0.675	0.522	0.303	0.402
07:25:09	28.3	0.09	0.09	0.092	0.09	0.089	0.092	0.088	0.092	0.097	0.648	0.684	0.493	0.672	0.728	0.639	0.689	0.691	0.697	0.35	0.414	0.435	0.305	0.426	0.466	0.344	0.426	0.626	0.335	0.391	0.445	0.32	0.364	0.448	0.318	0.37	0.679	0.583	0.624	0.642	0.441	0.679	0.646	0.558	0.651	0.683	0.548	0.305	0.408
07:30:09	28.3	0.09	0.09	0.092	0.09	0.089	0.092	0.088	0.092	0.097	0.649	0.672	0.502	0.724	0.71	0.672	0.69	0.69	0.699	0.354	0.425	0.444	0.306	0.438	0.479	0.347	0.436	0.655	0.344	0.397	0.455	0.324	0.37	0.46	0.322	0.378	0.703	0.605	0.612	0.637	0.454	0.745	0.708	0.576	0.653	0.686	0.564	0.309	0.416
07:35:09	28.3	0.09	0.09	0.092	0.09	0.089	0.092	0.088	0.092	0.097	0.657	0.68	0.519	0.699	0.723	0.702	0.69	0.683	0.7	0.361	0.431	0.456	0.311	0.447	0.496	0.352	0.445	0.661	0.353	0.405	0.466	0.327	0.379	0.478	0.321	0.385	0.755	0.625	0.616	0.638	0.468	0.748	0.707	0.606	0.657	0.691	0.58	0.318	0.424
07:40:09	28.3	0.09	0.089	0.092	0.09	0.089	0.092	0.088	0.092	0.097	0.652	0.666	0.542	0.7	0.706	0.715	0.695	0.687	0.697	0.357	0.438	0.473	0.316	0.462	0.518	0.356	0.452	0.699	0.355	0.408	0.48	0.331	0.384	0.496	0.322	0.393	0.783	0.652	0.633	0.637	0.483	0.741	0.734	0.647	0.657	0.695	0.608	0.321	0.431
07:45:09	28.3	0.09	0.09	0.092	0.09	0.089	0.092	0.088	0.092	0.097	0.662	0.665	0.567	0.683	0.699	0.728	0.694	0.688	0.695	0.373	0.445	0.477	0.317	0.471	0.535	0.358	0.466	0.745	0.365	0.417	0.493	0.334	0.392	0.515	0.333	0.405	0.792	0.676	0.615	0.649	0.49	0.715	0.733	0.641	0.658	0.695	0.637	0.329	0.444
07:50:09	28.3	0.09	0.09	0.092	0.09	0.089	0.092	0.088	0.092	0.097	0.667	0.662	0.591	0.686	0.702	0.727	0.694	0.691	0.702	0.372	0.455	0.496	0.324	0.491	0.559	0.367	0.481	0.741	0.374	0.427	0.509	0.338	0.402	0.536	0.338	0.416	0.789	0.695	0.62	0.649	0.506	0.712	0.691	0.659	0.661	0.699	0.639	0.331	0.45
07:55:09	28.3	0.09	0.09	0.092	0.09	0.089	0.092	0.088	0.092	0.097	0.67	0.665	0.626	0.688	0.705	0.725	0.697	0.692	0.712	0.362	0.469	0.517	0.329	0.504	0.583	0.373	0.499	0.752	0.379	0.434	0.524	0.34	0.409	0.56	0.333	0.427	0.791	0.678	0.621	0.657	0.529	0.686	0.676	0.657	0.663	0.698	0.665	0.335	0.469
08:00:09	28.3	0.09	0.09	0.092	0.09	0.089	0.092	0.088	0.092	0.097	0.668	0.667	0.645	0.686	0.703	0.72	0.697	0.694	0.709	0.378	0.478	0.532	0.33	0.524	0.6	0.373	0.517	0.726	0.386	0.443	0.54	0.342	0.418	0.571	0.331	0.436	0.771	0.697	0.628	0.66	0.545	0.677	0.681	0.659	0.665	0.701	0.677	0.343	0.485
08:05:09	28.3	0.09	0.09	0.092	0.09	0.089	0.092	0.088	0.092	0.097	0.671	0.668	0.664	0.68	0.702	0.724	0.698	0.694	0.713	0.387	0.494	0.548	0.332	0.542	0.613	0.377	0.527	0.715	0.391	0.452	0.56	0.346	0.425	0.587	0.338	0.45	0.759	0.684	0.628	0.662	0.558	0.679	0.682	0.667	0.667	0.701	0.672	0.345	0.493
08:10:09	28.3	0.09	0.09	0.092	0.089	0.089	0.092	0.088	0.092	0.097	0.669	0.668	0.693	0.679	0.702	0.726	0.699	0.696	0.715	0.406	0.503	0.564	0.334	0.558	0.626	0.385	0.541	0.727	0.39	0.458	0.572	0.351	0.435	0.601	0.349	0.464	0.75	0.674	0.634	0.663	0.573	0.686	0.682	0.67	0.668	0.702	0.682	0.35	0.5
08:15:09	28.3	0.09	0.09	0.092	0.09	0.089	0.092	0.088	0.091	0.097	0.67	0.669	0.698	0.682	0.702	0.724	0.7	0.696	0.716	0.407	0.508	0.587	0.341	0.575	0.634	0.388	0.554	0.727	0.399	0.468	0.594	0.353	0.447	0.612	0.357	0.477	0.746	0.689	0.634	0.663	0.592	0.689	0.685	0.678	0.668	0.705	0.679	0.354	0.511
08:20:09	28.3	0.09	0.09	0.092	0.09	0.089	0.092	0.088	0.091	0.097	0.671	0.672	0.696	0.682	0.705	0.729	0.699	0.698	0.721	0.405	0.523	0.607	0.348	0.605	0.655	0.393	0.57	0.734	0.405	0.478	0.605	0.358	0.458	0.628	0.357	0.49	0.75	0.686	0.634	0.668	0.605	0.691	0.684	0.681	0.67	0.708	0.686	0.358	0.522
08:25:09	28.3	0.09	0.09	0.092	0.09	0.089	0.092	0.088	0.092	0.097	0.672	0.671	0.683	0.684	0.705	0.732	0.703	0.699	0.722	0.406	0.535	0.63	0.349	0.617	0.672	0.398	0.568	0.74	0.413	0.488	0.641	0.363	0.466	0.643	0.357	0.512	0.747	0.693	0.637	0.668	0.633	0.689	0.681	0.684	0.671	0.708	0.674	0.363	0.54
08:30:09	28.3	0.09	0.089	0.092	0.089	0.089	0.092	0.088	0.091	0.097	0.669	0.671	0.685	0.682	0.704	0.735	0.703	0.7	0.724	0.414	0.552	0.644	0.349	0.631	0.694	0.405	0.57	0.739	0.419	0.498	0.642	0.366	0.475	0.662	0.357	0.526	0.755	0.689	0.638	0.668	0.655	0.689	0.682	0.687	0.669	0.712	0.673	0.363	0.554
08:35:09	28.3	0.09	0.089	0.092	0.09	0.089	0.092	0.088	0.091	0.097	0.671	0.672	0.691	0.683	0.706	0.735	0.705	0.702	0.733	0.428	0.569	0.663	0.354	0.65	0.718	0.41	0.58	0.745	0.428	0.51	0.658	0.368	0.486	0.672	0.365	0.543	0.751	0.698	0.64	0.668	0.667	0.689	0.682	0.688	0.67	0.711	0.679	0.368	0.567
08:40:09	28.3	0.09	0.089	0.092	0.09	0.089	0.092	0.088	0.092	0.097	0.67	0.672	0.679	0.685	0.706	0.741	0.703	0.701	0.735	0.431	0.588	0.668	0.356	0.66	0.727	0.418	0.586	0.748	0.43	0.522	0.668	0.371	0.495	0.69	0.366	0.557	0.754	0.697	0.641	0.669	0.662	0.691	0.682	0.691	0.67	0.711	0.682	0.372	0.585
08:45:09	28.3	0.09	0.089	0.092	0.09	0.089	0.092	0.088	0.091	0.097	0.672	0.671	0.691	0.685	0.706	0.739	0.705	0.702	0.737	0.451	0.604	0.664	0.357	0.675	0.72	0.421	0.588	0.75	0.436	0.537	0.669	0.376	0.508	0.696	0.371	0.575	0.755	0.698	0.642	0.662	0.661	0.692	0.685	0.693	0.669	0.71	0.686	0.376	0.599
08:50:09	28.3	0.09	0.089	0.092	0.09	0.089	0.092	0.088	0.091	0.097	0.673	0.674	0.695	0.685	0.706	0.741	0.706	0.706	0.741	0.461	0.615	0.667	0.362	0.696	0.74	0.43	0.59	0.754	0.445	0.56	0.679	0.38	0.529	0.711	0.376	0.589	0.761	0.702	0.643	0.667	0.671	0.694	0.685	0.695	0.67	0.71	0.689	0.383	0.611
08:55:09	28.3	0.09	0.089	0.092	0.09	0.089	0.092	0.088	0.091	0.097	0.673	0.673	0.691	0.684	0.707	0.741	0.706	0.703	0.74	0.452	0.635	0.654	0.368	0.704	0.731	0.435	0.595	0.754	0.458	0.571	0.678	0.385	0.545	0.703	0.386	0.599	0.758	0.698	0.641	0.667	0.663	0.697	0.686	0.695	0.672	0.707	0.69	0.386	0.619
09:00:09	28.3	0.09	0.089	0.092	0.09	0.089	0.092	0.088	0.091	0.097	0.673	0.671	0.697	0.688	0.707	0.743	0.706	0.707	0.745	0.469	0.658	0.667	0.371	0.717	0.725	0.444	0.602	0.759	0.471	0.587	0.68	0.389	0.559	0.714	0.382	0.61	0.766	0.703	0.643	0.67	0.679	0.696	0.686	0.696	0.675	0.707	0.69	0.392	0.629
09:05:09	28.3	0.09	0.09	0.092	0.09	0.089	0.092	0.088	0.091	0.097	0.672	0.671	0.697	0.687	0.706	0.741	0.703	0.706	0.744	0.482	0.676	0.67	0.375	0.73	0.727	0.453	0.605	0.76	0.482	0.608	0.683	0.393	0.574	0.716	0.389	0.622	0.764	0.703	0.641	0.669	0.682	0.696	0.686	0.697	0.675	0.708	0.689	0.394	0.644
09:10:09	28.3	0.09	0.09	0.092	0.09	0.089	0.092	0.088	0.091	0.097	0.669	0.67	0.694	0.686	0.705	0.741	0.701	0.706	0.745	0.489	0.665	0.667	0.38	0.747	0.726	0.462	0.609	0.762	0.495	0.628	0.673	0.396	0.584	0.72	0.387	0.631	0.766	0.701	0.641	0.669	0.685	0.694	0.685	0.698	0.673	0.706	0.687	0.397	0.657
09:15:09	28.3	0.09	0.089	0.092	0.09	0.089	0.092	0.088	0.091	0.097	0.671	0.668	0.696	0.688	0.705	0.74	0.702	0.707	0.747	0.498	0.676	0.665	0.384	0.763	0.733	0.472	0.615	0.762	0.504	0.633	0.683	0.4	0.601	0.723	0.396	0.644	0.768	0.703	0.639	0.669	0.689	0.693	0.685	0.699	0.672	0.703	0.69	0.402	0.674
09:20:09	28.3	0.09	0.089	0.092	0.09	0.089	0.092	0.088	0.091	0.097	0.674	0.672	0.699	0.686	0.704	0.738	0.702	0.705	0.747	0.513	0.67	0.669	0.388	0.775	0.737	0.483	0.616	0.765	0.513	0.65	0.689	0.408	0.62	0.721	0.402	0.663	0.768	0.703	0.638	0.666	0.693	0.695	0.684	0.698	0.674	0.702	0.691	0.407	0.666
09:25:09	28.3	0.09	0.09	0.092	0.089	0.089	0.092	0.088	0.091	0.097	0.673	0.667	0.694	0.685	0.705	0.739	0.698	0.703	0.747	0.518	0.671	0.671	0.392	0.783	0.741	0.491	0.621	0.763	0.528	0.656	0.692	0.413	0.626	0.725	0.407	0.678	0.766	0.704	0.638	0.668	0.696	0.695	0.685	0.698	0.672	0.704	0.692	0.412	0.67
09:30:09	28.3	0.09	0.089	0.092	0.09	0.089	0.092	0.088	0.091	0.097	0.674	0.654	0.698	0.686	0.704	0.738	0.697	0.703	0.747	0.527	0.672	0.67	0.397	0.785	0.744	0.499	0.624	0.764	0.532	0.658	0.69	0.416	0.641	0.727	0.413	0.696	0.765	0.701	0.638	0.671	0.701	0.695	0.685	0.697	0.675	0.705	0.69	0.417	0.668
09:35:09	28.3	0.09	0.09	0.092	0.09	0.089	0.092	0.088	0.091	0.097	0.674	0.663	0.698	0.683	0.702	0.735	0.702	0.702	0.747	0.535	0.681	0.675	0.398	0.783	0.744	0.505	0.624	0.763	0.544	0.656	0.693	0.419	0.653	0.726	0.416	0.706	0.762	0.702	0.64	0.667	0.7	0.691	0.684	0.697	0.674	0.702	0.692	0.421	0.668
09:40:09	28.3	0.09	0.09	0.092	0.09	0.089	0.092	0.088	0.091	0.097	0.672	0.665	0.695	0.681	0.701	0.735	0.704	0.702	0.747	0.548	0.674	0.671	0.405	0.783	0.746	0.518	0.63	0.764	0.559	0.656	0.693	0.424	0.667	0.728	0.422	0.714	0.764	0.7	0.636	0.665	0.699	0.691	0.684	0.698	0.675	0.697	0.69	0.422	0.675
09:45:09	28.3	0.09	0.09	0.092	0.09	0.089	0.092	0.088	0.091	0.097	0.67	0.669	0.698	0.68	0.704	0.736	0.698	0.702	0.75	0.565	0.677	0.67	0.411	0.785	0.75	0.542	0.635	0.765	0.577	0.663	0.694	0.43	0.689	0.728	0.431	0.72	0.764	0.701	0.637	0.666	0.701	0.691	0.684	0.696	0.674	0.702	0.69	0.432	0.676
09:50:09	28.3	0.09	0.089	0.092	0.09	0.089	0.092	0.088	0.091	0.097	0.667	0.666	0.696	0.679	0.7	0.733	0.695	0.699	0.747	0.574	0.68	0.673	0.416	0.78	0.747	0.543	0.635	0.764	0.582	0.662	0.695	0.434	0.689	0.73	0.437	0.725	0.763	0.702	0.638	0.665	0.7	0.687	0.683	0.697	0.673	0.705	0.689	0.433	0.68
09:55:09	28.3	0.09	0.089	0.092	0.09	0.089	0.092	0.088	0.091	0.097	0.674	0.663	0.693	0.677	0.698	0.732	0.696	0.701	0.747	0.582	0.689	0.672	0.416	0.781	0.748	0.552	0.636	0.762	0.594	0.667	0.697	0.439	0.699	0.729	0.449	0.729	0.76	0.7	0.641	0.669	0.699	0.689	0.683	0.697	0.672	0.701	0.688	0.436	0.681
10:00:09	28.3	0.09	0.09	0.092	0.09	0.089	0.092	0.088	0.091	0.097	0.675	0.661	0.696	0.675	0.695	0.73	0.696	0.698	0.746	0.591	0.688	0.672	0.423	0.782	0.747	0.56	0.639	0.763	0.604	0.668	0.697	0.443	0.706	0.727	0.452	0.729	0.762	0.701	0.638	0.665	0.7	0.687	0.68	0.696	0.67	0.705	0.69	0.439	0.687
10:05:09	28.3	0.09	0.09	0.092	0.089	0.089	0.092	0.088	0.091	0.097	0.673	0.661	0.698	0.673	0.698	0.728	0.699	0.699	0.744	0.603	0.692	0.67	0.431	0.784	0.75	0.57	0.643	0.761	0.617	0.669	0.691	0.449	0.724	0.727	0.46	0.733	0.761	0.696	0.637	0.664	0.699	0.686	0.681	0.695	0.674	0.703	0.688	0.443	0.686
10:10:09	28.3	0.09	0.09	0.092	0.09	0.089	0.092	0.088	0.091	0.097	0.674	0.663	0.692	0.674	0.697	0.727	0.695	0.702	0.744	0.61	0.69	0.668	0.433	0.787	0.749	0.584	0.644	0.76	0.627	0.672	0.695	0.455	0.744	0.726	0.472	0.735	0.761	0.694	0.639	0.67	0.7	0.682	0.68	0.694	0.676	0.706	0.685	0.455	0.692
10:15:09	28.3	0.09	0.09	0.092	0.09	0.089	0.092	0.088	0.091	0.097	0.676	0.665	0.696	0.674	0.697	0.729	0.7	0.701	0.744	0.615	0.69	0.674	0.439	0.786	0.748	0.595	0.642	0.76	0.637	0.671	0.691	0.461	0.747	0.728	0.478	0.734	0.759	0.694	0.641	0.669	0.702	0.683	0.679	0.692	0.677	0.701	0.688	0.46	0.692
10:20:09	28.3	0.09	0.09	0.092	0.09	0.089	0.092	0.088	0.091	0.097	0.678	0.668	0.695	0.675	0.696	0.728	0.701	0.699	0.744	0.63	0.688	0.668	0.445	0.786	0.746	0.607	0.648	0.76	0.642	0.671	0.691	0.467	0.747	0.726	0.486	0.738	0.761	0.699	0.64	0.665	0.7	0.682	0.677	0.69	0.672	0.7	0.69	0.462	0.695
10:25:09	28.3	0.09	0.09	0.092	0.09	0.089	0.092	0.088	0.091	0.097	0.676	0.668	0.7	0.676	0.696	0.729	0.702	0.7	0.742	0.638	0.69	0.672	0.451	0.788	0.748	0.612	0.643	0.761	0.66	0.669	0.691	0.474	0.748	0.724	0.491	0.746	0.762	0.699	0.641	0.666	0.698	0.683	0.676	0.687	0.674	0.696	0.689	0.469	0.693
10:30:09	28.3	0.09	0.09	0.092	0.09	0.089	0.092	0.088	0.091	0.097	0.678	0.669	0.694	0.676	0.692	0.727	0.699	0.697	0.742	0.654	0.69	0.674	0.456	0.786	0.746	0.614	0.647	0.76	0.659	0.67	0.691	0.478	0.749	0.721	0.497	0.749	0.759	0.701	0.643	0.666	0.699	0.679	0.679	0.685	0.672	0.701	0.687	0.474	0.697
10:35:09	28.3	0.09	0.09	0.092	0.089	0.089	0.092	0.088	0.091	0.097	0.676	0.662	0.69	0.671	0.689	0.722	0.698	0.696	0.739	0.658	0.688	0.671	0.466	0.786	0.745	0.621	0.645	0.759	0.668	0.671	0.688	0.484	0.752	0.722	0.515	0.752	0.755	0.696	0.64	0.664	0.697	0.678	0.678	0.683	0.671	0.696	0.684	0.479	0.693
10:40:09	28.3	0.09	0.09	0.092	0.09	0.089	0.092	0.088	0.091	0.097	0.678	0.658	0.692	0.67	0.689	0.721	0.698	0.7	0.74	0.674	0.692	0.664	0.473	0.786	0.745	0.632	0.648	0.758	0.672	0.669	0.688	0.493	0.754	0.723	0.529	0.754	0.754	0.698	0.64	0.664	0.699	0.678	0.675	0.682	0.67	0.694	0.684	0.487	0.697
10:45:09	28.3	0.09	0.09	0.092	0.09	0.089	0.092	0.088	0.091	0.097	0.677	0.657	0.691	0.673	0.688	0.722	0.698	0.696	0.74	0.691	0.685	0.668	0.483	0.785	0.743	0.645	0.649	0.756	0.681	0.672	0.688	0.503	0.753	0.72	0.542	0.754	0.757	0.699	0.64	0.668	0.7	0.676	0.675	0.684	0.668	0.694	0.684	0.492	0.695
10:50:09	28.3	0.09	0.089	0.092	0.089	0.089	0.092	0.088	0.091	0.097	0.674	0.661	0.686	0.675	0.687	0.717	0.696	0.695	0.739	0.672	0.689	0.665	0.488	0.784	0.739	0.656	0.649	0.753	0.697	0.672	0.687	0.507	0.754	0.724	0.548	0.754	0.757	0.7	0.639	0.666	0.697	0.673	0.672	0.685	0.665	0.695	0.685	0.491	0.698
10:55:08	28.3	0.09	0.09	0.092	0.09	0.089	0.092	0.088	0.091	0.097	0.672	0.665	0.692	0.673	0.681	0.718	0.696	0.692	0.739	0.693	0.689	0.66	0.497	0.781	0.738	0.658	0.65	0.754	0.689	0.668	0.687	0.511	0.754	0.717	0.557	0.757	0.757	0.701	0.639	0.664	0.698	0.673	0.672	0.686	0.665	0.695	0.683	0.494	0.697
11:00:09	28.3	0.09	0.09	0.092	0.09	0.089	0.092	0.088	0.091	0.097	0.672	0.664	0.691	0.675	0.683	0.716	0.695	0.694	0.739	0.669	0.687	0.661	0.498	0.782	0.739	0.67	0.653	0.755	0.689	0.672	0.687	0.517	0.755	0.716	0.571	0.758	0.756	0.704	0.64	0.664	0.694	0.672	0.672	0.686	0.667	0.696	0.681	0.501	0.689
11:05:09	28.3	0.09	0.089	0.092	0.089	0.089	0.092	0.088	0.091	0.097	0.672	0.666	0.692	0.674	0.684	0.72	0.698	0.695	0.742	0.683	0.68	0.663	0.508	0.78	0.741	0.673	0.655	0.757	0.681	0.669	0.687	0.522	0.757	0.721	0.58	0.76	0.755	0.704	0.638	0.661	0.699	0.672	0.674	0.681	0.67	0.696	0.686	0.513	0.696
11:10:09	28.3	0.09	0.09	0.092	0.09	0.089	0.092	0.088	0.091	0.097	0.673	0.663	0.696	0.671	0.683	0.717	0.699	0.693	0.735	0.686	0.686	0.671	0.508	0.778	0.738	0.676	0.654	0.759	0.674	0.669	0.689	0.529	0.757	0.717	0.592	0.76	0.752	0.698	0.638	0.662	0.7	0.674	0.675	0.68	0.669	0.69	0.687	0.519	0.696
11:15:09	28.3	0.09	0.089	0.092	0.09	0.089	0.092	0.088	0.091	0.097	0.674	0.665	0.691	0.671	0.678	0.715	0.701	0.691	0.733	0.686	0.68	0.67	0.513	0.776	0.735	0.68	0.655	0.754	0.698	0.667	0.684	0.533	0.756	0.72	0.604	0.761	0.75	0.693	0.637	0.663	0.699	0.671	0.673	0.68	0.669	0.69	0.683	0.524	0.694
11:20:09	28.3	0.09	0.09	0.092	0.09	0.089	0.092	0.088	0.091	0.097	0.674	0.663	0.683	0.667	0.675	0.717	0.696	0.689	0.734	0.679	0.679	0.676	0.519	0.776	0.734	0.692	0.655	0.754	0.698	0.662	0.681	0.541	0.757	0.716	0.612	0.761	0.75	0.689	0.638	0.662	0.697	0.671	0.671	0.682	0.666	0.689	0.682	0.533	0.693
11:25:09	28.3	0.09	0.09	0.092	0.09	0.089	0.092	0.088	0.091	0.097	0.674	0.661	0.683	0.663	0.679	0.717	0.698	0.69	0.736	0.679	0.681	0.672	0.524	0.772	0.733	0.699	0.654	0.754	0.696	0.663	0.685	0.547	0.756	0.717	0.625	0.762	0.746	0.689	0.639	0.661	0.698	0.668	0.669	0.682	0.662	0.689	0.687	0.542	0.694
11:30:09	28.3	0.09	0.09	0.092	0.09	0.089	0.092	0.088	0.091	0.097	0.676	0.658	0.686	0.664	0.677	0.716	0.698	0.691	0.733	0.689	0.681	0.671	0.532	0.771	0.73	0.708	0.654	0.753	0.699	0.66	0.683	0.555	0.756	0.715	0.632	0.759	0.744	0.689	0.639	0.661	0.699	0.669	0.672	0.681	0.664	0.684	0.681	0.55	0.694
11:35:09	28.3	0.09	0.09	0.092	0.09	0.089	0.092	0.088	0.091	0.097	0.674	0.656	0.69	0.663	0.679	0.714	0.699	0.693	0.734	0.69	0.678	0.671	0.537	0.769	0.728	0.719	0.653	0.755	0.703	0.658	0.684	0.565	0.756	0.715	0.638	0.761	0.745	0.693	0.638	0.661	0.697	0.669	0.667	0.68	0.664	0.684	0.684	0.561	0.696
11:40:09	28.3	0.09	0.09	0.092	0.089	0.089	0.092	0.088	0.091	0.097	0.673	0.661	0.685	0.664	0.671	0.713	0.698	0.695	0.73	0.685	0.674	0.67	0.54	0.766	0.729	0.725	0.658	0.755	0.701	0.66	0.681	0.572	0.754	0.713	0.644	0.761	0.744	0.697	0.639	0.661	0.696	0.668	0.666	0.679	0.663	0.689	0.683	0.565	0.693
11:45:09	28.3	0.09	0.09	0.092	0.09	0.089	0.092	0.088	0.091	0.096	0.674	0.663	0.682	0.665	0.67	0.708	0.7	0.692	0.729	0.682	0.677	0.67	0.546	0.762	0.727	0.729	0.661	0.752	0.702	0.658	0.679	0.578	0.752	0.711	0.655	0.76	0.741	0.696	0.64	0.663	0.696	0.667	0.663	0.677	0.664	0.684	0.681	0.576	0.693
11:50:09	28.3	0.09	0.09	0.092	0.089	0.089	0.092	0.088	0.091	0.096	0.673	0.667	0.682	0.663	0.671	0.709	0.698	0.695	0.727	0.685	0.677	0.669	0.55	0.762	0.727	0.734	0.661	0.752	0.706	0.66	0.68	0.583	0.752	0.706	0.664	0.759	0.739	0.69	0.639	0.664	0.696	0.663	0.664	0.678	0.662	0.683	0.683	0.578	0.694
11:55:09	28.3	0.09	0.09	0.092	0.089	0.089	0.092	0.088	0.091	0.096	0.672	0.665	0.69	0.665	0.68	0.709	0.698	0.698	0.733	0.686	0.678	0.667	0.555	0.761	0.727	0.739	0.658	0.752	0.709	0.661	0.681	0.592	0.753	0.709	0.669	0.76	0.74	0.692	0.641	0.665	0.693	0.665	0.668	0.679	0.662	0.682	0.683	0.586	0.695
12:00:09	28.3	0.09	0.09	0.092	0.09	0.089	0.092	0.088	0.091	0.096	0.672	0.668	0.692	0.665	0.668	0.709	0.698	0.695	0.734	0.685	0.684	0.665	0.561	0.76	0.726	0.744	0.652	0.752	0.711	0.662	0.68	0.599	0.75	0.712	0.676	0.76	0.742	0.689	0.641	0.665	0.696	0.664	0.664	0.68	0.661	0.683	0.679	0.594	0.694
12:05:09	28.3	0.09	0.089	0.092	0.089	0.089	0.092	0.088	0.091	0.096	0.675	0.669	0.69	0.668	0.675	0.71	0.7	0.692	0.731	0.694	0.682	0.668	0.569	0.756	0.725	0.741	0.657	0.751	0.71	0.66	0.679	0.609	0.75	0.71	0.681	0.761	0.745	0.691	0.642	0.666	0.696	0.665	0.665	0.682	0.664	0.687	0.682	0.597	0.696
12:10:09	28.3	0.09	0.09	0.092	0.09	0.089	0.092	0.088	0.091	0.097	0.674	0.667	0.685	0.664	0.669	0.702	0.699	0.69	0.728	0.699	0.676	0.667	0.574	0.754	0.726	0.742	0.657	0.749	0.709	0.66	0.678	0.615	0.748	0.702	0.687	0.758	0.74	0.684	0.642	0.666	0.691	0.665	0.661	0.683	0.66	0.685	0.681	0.603	0.692
12:15:09	28.3	0.09	0.09	0.092	0.089	0.089	0.092	0.088	0.091	0.096	0.673	0.669	0.686	0.665	0.67	0.705	0.7	0.693	0.729	0.692	0.673	0.665	0.578	0.753	0.723	0.745	0.661	0.751	0.709	0.658	0.679	0.622	0.746	0.704	0.694	0.759	0.735	0.683	0.642	0.666	0.691	0.666	0.667	0.678	0.661	0.685	0.685	0.617	0.69
12:20:09	28.3	0.09	0.09	0.092	0.09	0.089	0.092	0.088	0.091	0.096	0.673	0.668	0.686	0.666	0.671	0.702	0.702	0.696	0.724	0.698	0.673	0.668	0.583	0.753	0.722	0.753	0.663	0.754	0.713	0.658	0.676	0.625	0.746	0.707	0.7	0.759	0.734	0.685	0.644	0.667	0.692	0.665	0.663	0.678	0.661	0.686	0.68	0.617	0.693
12:25:09	28.3	0.09	0.09	0.092	0.09	0.089	0.092	0.088	0.091	0.096	0.675	0.664	0.688	0.665	0.673	0.705	0.701	0.693	0.727	0.697	0.675	0.672	0.59	0.75	0.724	0.754	0.658	0.752	0.714	0.661	0.679	0.631	0.743	0.702	0.704	0.758	0.733	0.69	0.644	0.668	0.692	0.663	0.662	0.677	0.662	0.682	0.679	0.625	0.689
12:30:09	28.3	0.09	0.089	0.092	0.09	0.089	0.092	0.088	0.091	0.096	0.676	0.663	0.684	0.666	0.669	0.705	0.702	0.691	0.726	0.696	0.673	0.668	0.593	0.747	0.722	0.758	0.662	0.751	0.718	0.662	0.678	0.636	0.74	0.696	0.709	0.756	0.733	0.694	0.645	0.669	0.691	0.663	0.661	0.678	0.662	0.684	0.679	0.631	0.689
12:35:09	28.3	0.09	0.09	0.092	0.089	0.089	0.092	0.088	0.091	0.096	0.675	0.664	0.679	0.666	0.669	0.701	0.703	0.691	0.725	0.687	0.677	0.665	0.599	0.744	0.721	0.759	0.663	0.75	0.715	0.659	0.677	0.643	0.739	0.699	0.719	0.756	0.734	0.694	0.646	0.67	0.685	0.665	0.661	0.682	0.663	0.684	0.675	0.633	0.689
12:40:09	28.3	0.09	0.09	0.092	0.089	0.089	0.092	0.088	0.091	0.096	0.674	0.665	0.683	0.667	0.67	0.701	0.704	0.692	0.728	0.689	0.68	0.665	0.601	0.741	0.723	0.76	0.662	0.751	0.712	0.661	0.678	0.649	0.735	0.701	0.722	0.755	0.735	0.686	0.648	0.673	0.688	0.665	0.659	0.684	0.664	0.687	0.677	0.636	0.692
12:45:09	28.3	0.09	0.09	0.092	0.089	0.089	0.092	0.088	0.091	0.096	0.674	0.664	0.688	0.669	0.672	0.701	0.705	0.693	0.725	0.691	0.676	0.664	0.607	0.744	0.722	0.763	0.663	0.753	0.712	0.66	0.677	0.655	0.735	0.695	0.727	0.754	0.732	0.687	0.65	0.674	0.688	0.664	0.656	0.681	0.665	0.684	0.675	0.644	0.691
12:50:09	28.3	0.09	0.09	0.092	0.09	0.089	0.092	0.088	0.091	0.096	0.677	0.664	0.687	0.668	0.672	0.702	0.705	0.695	0.724	0.694	0.674	0.665	0.612	0.745	0.725	0.766	0.663	0.753	0.711	0.663	0.679	0.666	0.732	0.699	0.733	0.754	0.73	0.686	0.651	0.676	0.689	0.665	0.657	0.677	0.666	0.687	0.676	0.648	0.687
12:55:09	28.3	0.09	0.09	0.092	0.089	0.089	0.092	0.088	0.091	0.096	0.677	0.664	0.688	0.67	0.674	0.699	0.708	0.696	0.722	0.694	0.674	0.665	0.616	0.745	0.723	0.767	0.661	0.754	0.713	0.661	0.68	0.672	0.735	0.697	0.736	0.756	0.73	0.686	0.652	0.677	0.689	0.666	0.657	0.679	0.668	0.685	0.677	0.655	0.686
13:00:09	28.3	0.09	0.09	0.092	0.089	0.089	0.092	0.088	0.091	0.096	0.678	0.666	0.686	0.671	0.673	0.702	0.709	0.697	0.728	0.692	0.675	0.666	0.621	0.743	0.725	0.771	0.663	0.753	0.712	0.66	0.681	0.675	0.736	0.696	0.741	0.751	0.732	0.682	0.651	0.677	0.683	0.668	0.659	0.679	0.668	0.687	0.677	0.649	0.685
13:05:09	28.3	0.09	0.09	0.092	0.089	0.089	0.092	0.088	0.091	0.096	0.676	0.667	0.689	0.671	0.675	0.703	0.708	0.7	0.724	0.687	0.672	0.662	0.629	0.744	0.721	0.771	0.666	0.753	0.712	0.66	0.681	0.685	0.734	0.696	0.744	0.755	0.728	0.683	0.653	0.677	0.686	0.668	0.66	0.682	0.669	0.685	0.679	0.655	0.685
13:10:09	28.3	0.09	0.09	0.092	0.089	0.089	0.092	0.088	0.091	0.096	0.677	0.672	0.684	0.671	0.681	0.7	0.706	0.699	0.726	0.688	0.673	0.665	0.636	0.742	0.72	0.771	0.663	0.754	0.713	0.663	0.682	0.684	0.735	0.697	0.741	0.755	0.724	0.685	0.654	0.678	0.686	0.671	0.661	0.684	0.67	0.687	0.681	0.66	0.687
13:15:09	28.3	0.09	0.09	0.092	0.089	0.089	0.092	0.088	0.091	0.096	0.679	0.673	0.687	0.672	0.684	0.7	0.708	0.702	0.726	0.687	0.672	0.666	0.64	0.744	0.724	0.773	0.662	0.755	0.714	0.66	0.679	0.687	0.734	0.695	0.743	0.755	0.727	0.686	0.655	0.679	0.684	0.672	0.662	0.683	0.671	0.687	0.673	0.653	0.688
13:20:09	28.3	0.09	0.09	0.092	0.09	0.089	0.092	0.088	0.091	0.096	0.679	0.674	0.688	0.67	0.682	0.701	0.707	0.701	0.727	0.687	0.672	0.671	0.647	0.742	0.726	0.775	0.663	0.756	0.709	0.658	0.68	0.69	0.729	0.696	0.747	0.758	0.727	0.687	0.656	0.68	0.686	0.672	0.664	0.683	0.672	0.688	0.672	0.654	0.685
13:25:09	28.3	0.09	0.089	0.091	0.09	0.089	0.092	0.088	0.091	0.096	0.68	0.675	0.689	0.67	0.68	0.702	0.71	0.703	0.727	0.689	0.671	0.668	0.653	0.741	0.726	0.776	0.663	0.756	0.71	0.658	0.678	0.694	0.724	0.696	0.748	0.759	0.726	0.69	0.657	0.681	0.686	0.671	0.665	0.683	0.672	0.689	0.671	0.662	0.684
13:30:09	28.3	0.09	0.09	0.092	0.09	0.089	0.092	0.088	0.091	0.096	0.681	0.676	0.679	0.67	0.678	0.705	0.709	0.705	0.728	0.69	0.67	0.667	0.657	0.743	0.726	0.776	0.664	0.756	0.71	0.66	0.676	0.698	0.726	0.694	0.748	0.757	0.725	0.689	0.658	0.683	0.688	0.675	0.666	0.681	0.672	0.688	0.675	0.665	0.686
13:35:09	28.3	0.09	0.09	0.091	0.089	0.089	0.092	0.088	0.091	0.096	0.681	0.677	0.681	0.669	0.678	0.704	0.71	0.706	0.729	0.689	0.665	0.668	0.661	0.742	0.727	0.775	0.662	0.756	0.706	0.66	0.677	0.703	0.722	0.695	0.749	0.756	0.726	0.689	0.658	0.683	0.687	0.672	0.666	0.686	0.674	0.69	0.679	0.664	0.687
13:40:09	28.3	0.09	0.09	0.092	0.09	0.089	0.092	0.088	0.091	0.096	0.681	0.678	0.678	0.669	0.679	0.704	0.709	0.708	0.729	0.688	0.668	0.669	0.665	0.741	0.727	0.776	0.663	0.756	0.708	0.661	0.679	0.708	0.724	0.697	0.75	0.757	0.727	0.691	0.658	0.684	0.687	0.672	0.668	0.686	0.673	0.69	0.679	0.666	0.686
13:45:09	28.3	0.09	0.089	0.092	0.089	0.089	0.092	0.088	0.091	0.096	0.682	0.678	0.678	0.67	0.682	0.706	0.71	0.71	0.73	0.688	0.669	0.671	0.667	0.739	0.729	0.779	0.662	0.756	0.709	0.66	0.682	0.71	0.721	0.694	0.751	0.754	0.727	0.693	0.659	0.684	0.687	0.673	0.67	0.686	0.674	0.69	0.68	0.665	0.686
13:50:09	28.3	0.09	0.089	0.091	0.089	0.089	0.092	0.088	0.091	0.096	0.681	0.676	0.681	0.672	0.68	0.704	0.709	0.708	0.729	0.685	0.668	0.672	0.664	0.738	0.729	0.781	0.662	0.757	0.709	0.659	0.682	0.711	0.72	0.693	0.762	0.758	0.73	0.693	0.657	0.685	0.685	0.674	0.668	0.689	0.673	0.69	0.679	0.667	0.687
13:55:09	28.3	0.09	0.09	0.091	0.089	0.089	0.092	0.088	0.091	0.096	0.682	0.677	0.681	0.674	0.683	0.707	0.71	0.711	0.73	0.69	0.673	0.674	0.674	0.74	0.732	0.784	0.661	0.758	0.703	0.661	0.687	0.716	0.723	0.695	0.757	0.757	0.725	0.693	0.657	0.686	0.689	0.678	0.672	0.687	0.675	0.691	0.678	0.673	0.685
14:00:09	28.3	0.09	0.09	0.092	0.089	0.089	0.092	0.088	0.091	0.096	0.682	0.677	0.679	0.674	0.684	0.703	0.711	0.714	0.733	0.69	0.675	0.675	0.675	0.739	0.728	0.781	0.664	0.761	0.703	0.661	0.689	0.715	0.724	0.694	0.752	0.758	0.729	0.695	0.657	0.686	0.689	0.682	0.67	0.689	0.674	0.691	0.68	0.672	0.685
14:05:09	28.3	0.09	0.09	0.092	0.09	0.089	0.092	0.088	0.091	0.096	0.682	0.677	0.68	0.674	0.685	0.703	0.711	0.714	0.734	0.688	0.674	0.673	0.679	0.739	0.729	0.781	0.663	0.76	0.697	0.663	0.69	0.716	0.718	0.694	0.752	0.756	0.729	0.692	0.658	0.687	0.689	0.683	0.673	0.69	0.675	0.691	0.681	0.67	0.685
14:10:09	28.3	0.09	0.089	0.091	0.089	0.089	0.092	0.088	0.091	0.096	0.681	0.677	0.681	0.675	0.686	0.706	0.711	0.715	0.734	0.69	0.673	0.673	0.679	0.741	0.731	0.78	0.664	0.76	0.704	0.663	0.691	0.716	0.718	0.696	0.752	0.76	0.729	0.694	0.658	0.688	0.688	0.684	0.675	0.689	0.676	0.693	0.681	0.668	0.686
14:15:09	28.3	0.09	0.09	0.092	0.09	0.089	0.092	0.088	0.091	0.096	0.681	0.678	0.686	0.675	0.687	0.706	0.711	0.715	0.736	0.69	0.674	0.675	0.682	0.738	0.731	0.781	0.664	0.761	0.709	0.665	0.691	0.716	0.718	0.698	0.754	0.759	0.728	0.695	0.658	0.687	0.687	0.684	0.677	0.691	0.676	0.693	0.682	0.673	0.686
14:20:09	28.3	0.09	0.089	0.092	0.089	0.089	0.092	0.088	0.091	0.096	0.681	0.678	0.678	0.675	0.689	0.707	0.712	0.718	0.736	0.696	0.675	0.677	0.682	0.736	0.734	0.783	0.663	0.762	0.71	0.664	0.692	0.716	0.721	0.698	0.754	0.76	0.728	0.695	0.658	0.688	0.687	0.684	0.676	0.692	0.677	0.693	0.683	0.676	0.686
14:25:09	28.3	0.09	0.09	0.092	0.089	0.089	0.092	0.088	0.091	0.096	0.681	0.679	0.685	0.675	0.688	0.708	0.712	0.718	0.736	0.691	0.673	0.679	0.683	0.737	0.736	0.783	0.664	0.762	0.713	0.665	0.693	0.717	0.717	0.699	0.758	0.759	0.728	0.697	0.658	0.688	0.69	0.683	0.677	0.691	0.677	0.691	0.685	0.673	0.687
14:30:09	28.3	0.09	0.089	0.091	0.089	0.089	0.092	0.088	0.091	0.096	0.681	0.68	0.69	0.676	0.689	0.71	0.713	0.718	0.735	0.69	0.673	0.68	0.684	0.738	0.736	0.784	0.663	0.761	0.709	0.664	0.696	0.719	0.716	0.7	0.758	0.757	0.731	0.698	0.657	0.688	0.692	0.682	0.677	0.693	0.679	0.693	0.685	0.672	0.687
14:35:09	28.3	0.09	0.09	0.092	0.09	0.089	0.092	0.088	0.091	0.096	0.681	0.68	0.694	0.675	0.689	0.709	0.712	0.718	0.737	0.696	0.673	0.682	0.685	0.738	0.734	0.783	0.665	0.761	0.711	0.664	0.698	0.72	0.716	0.701	0.76	0.76	0.727	0.699	0.657	0.689	0.69	0.683	0.679	0.694	0.678	0.693	0.684	0.678	0.688
14:40:09	28.3	0.09	0.09	0.092	0.089	0.089	0.092	0.088	0.091	0.096	0.682	0.68	0.697	0.675	0.688	0.711	0.714	0.72	0.737	0.696	0.675	0.684	0.693	0.737	0.732	0.782	0.665	0.762	0.713	0.664	0.699	0.724	0.715	0.702	0.759	0.761	0.727	0.7	0.657	0.69	0.691	0.686	0.68	0.694	0.678	0.694	0.683	0.674	0.689
14:45:09	28.3	0.09	0.09	0.092	0.09	0.089	0.092	0.088	0.091	0.096	0.683	0.68	0.698	0.676	0.69	0.712	0.715	0.722	0.738	0.683	0.677	0.683	0.689	0.739	0.735	0.779	0.664	0.762	0.711	0.666	0.699	0.722	0.715	0.705	0.76	0.761	0.731	0.7	0.658	0.69	0.694	0.686	0.679	0.694	0.677	0.693	0.683	0.671	0.688
14:50:09	28.3	0.09	0.09	0.092	0.089	0.089	0.092	0.088	0.091	0.096	0.684	0.681	0.698	0.676	0.691	0.712	0.714	0.722	0.74	0.683	0.678	0.683	0.685	0.739	0.737	0.779	0.665	0.763	0.703	0.666	0.7	0.718	0.714	0.703	0.76	0.761	0.729	0.7	0.657	0.69	0.694	0.686	0.681	0.694	0.678	0.693	0.683	0.672	0.69
14:55:09	28.3	0.09	0.089	0.092	0.089	0.089	0.092	0.088	0.091	0.096	0.685	0.682	0.698	0.676	0.692	0.713	0.716	0.724	0.739	0.688	0.68	0.684	0.684	0.741	0.737	0.781	0.664	0.764	0.7	0.665	0.698	0.718	0.714	0.706	0.761	0.762	0.73	0.701	0.658	0.689	0.692	0.686	0.684	0.693	0.681	0.695	0.683	0.671	0.688
15:00:09	28.3	0.09	0.089	0.092	0.089	0.089	0.092	0.088	0.091	0.096	0.684	0.682	0.697	0.677	0.692	0.713	0.716	0.722	0.739	0.695	0.682	0.684	0.68	0.741	0.737	0.783	0.663	0.763	0.696	0.666	0.699	0.718	0.718	0.706	0.765	0.762	0.731	0.701	0.657	0.69	0.695	0.686	0.683	0.696	0.682	0.694	0.685	0.672	0.69
15:05:09	28.3	0.09	0.09	0.092	0.09	0.089	0.092	0.088	0.091	0.096	0.685	0.683	0.696	0.676	0.691	0.714	0.716	0.723	0.74	0.693	0.682	0.684	0.681	0.743	0.737	0.784	0.664	0.764	0.694	0.667	0.7	0.721	0.72	0.708	0.767	0.766	0.728	0.701	0.657	0.69	0.695	0.686	0.685	0.696	0.682	0.695	0.685	0.673	0.69
15:10:09	28.3	0.09	0.09	0.092	0.089	0.089	0.092	0.088	0.091	0.096	0.685	0.682	0.696	0.677	0.692	0.715	0.718	0.724	0.741	0.695	0.683	0.684	0.682	0.745	0.737	0.78	0.664	0.764	0.7	0.669	0.7	0.719	0.714	0.709	0.768	0.765	0.728	0.701	0.658	0.689	0.698	0.687	0.687	0.695	0.681	0.696	0.687	0.671	0.691
15:15:09	28.3	0.09	0.089	0.091	0.089	0.089	0.092	0.088	0.091	0.096	0.686	0.684	0.697	0.677	0.692	0.716	0.718	0.725	0.741	0.699	0.684	0.685	0.684	0.747	0.739	0.786	0.664	0.765	0.706	0.67	0.701	0.72	0.717	0.709	0.767	0.766	0.728	0.702	0.658	0.69	0.699	0.687	0.687	0.696	0.682	0.697	0.687	0.676	0.693
15:20:09	28.3	0.09	0.089	0.091	0.089	0.089	0.092	0.088	0.091	0.096	0.686	0.682	0.699	0.677	0.693	0.716	0.718	0.726	0.74	0.696	0.686	0.684	0.684	0.747	0.739	0.783	0.665	0.766	0.706	0.67	0.701	0.719	0.715	0.71	0.769	0.767	0.728	0.701	0.657	0.69	0.698	0.686	0.685	0.695	0.683	0.696	0.686	0.672	0.69
15:25:09	28.3	0.09	0.09	0.092	0.089	0.089	0.092	0.088	0.091	0.096	0.686	0.686	0.7	0.678	0.693	0.716	0.719	0.727	0.74	0.693	0.687	0.685	0.684	0.746	0.74	0.782	0.665	0.765	0.709	0.671	0.701	0.72	0.716	0.71	0.765	0.768	0.729	0.702	0.657	0.691	0.7	0.686	0.686	0.695	0.684	0.695	0.686	0.67	0.692
15:30:09	28.3	0.09	0.09	0.092	0.089	0.089	0.092	0.088	0.091	0.096	0.687	0.688	0.7	0.68	0.694	0.719	0.722	0.73	0.743	0.695	0.689	0.685	0.685	0.748	0.743	0.784	0.667	0.767	0.707	0.671	0.7	0.719	0.716	0.712	0.768	0.772	0.729	0.701	0.657	0.691	0.701	0.687	0.687	0.693	0.684	0.698	0.685	0.671	0.694
15:35:09	28.3	0.09	0.09	0.092	0.09	0.089	0.092	0.088	0.091	0.096	0.689	0.689	0.7	0.68	0.695	0.719	0.721	0.73	0.742	0.695	0.69	0.684	0.684	0.749	0.744	0.786	0.667	0.768	0.705	0.671	0.7	0.72	0.719	0.711	0.768	0.771	0.73	0.702	0.658	0.692	0.702	0.686	0.688	0.7	0.684	0.697	0.685	0.673	0.697
15:40:09	28.3	0.09	0.09	0.091	0.089	0.089	0.092	0.088	0.091	0.096	0.689	0.689	0.699	0.68	0.695	0.718	0.721	0.727	0.742	0.694	0.689	0.684	0.686	0.749	0.744	0.788	0.667	0.767	0.703	0.67	0.701	0.72	0.719	0.713	0.767	0.774	0.73	0.701	0.658	0.691	0.703	0.686	0.687	0.696	0.684	0.697	0.686	0.67	0.697
15:45:09	28.3	0.09	0.09	0.092	0.09	0.089	0.092	0.088	0.091	0.096	0.69	0.692	0.699	0.681	0.697	0.718	0.722	0.729	0.743	0.695	0.689	0.684	0.684	0.749	0.744	0.787	0.666	0.768	0.702	0.672	0.701	0.721	0.719	0.712	0.773	0.775	0.73	0.701	0.658	0.693	0.704	0.688	0.689	0.697	0.685	0.699	0.686	0.674	0.697
15:50:09	28.3	0.09	0.09	0.091	0.089	0.089	0.092	0.088	0.091	0.096	0.69	0.692	0.701	0.682	0.696	0.719	0.723	0.73	0.742	0.693	0.689	0.682	0.683	0.75	0.745	0.783	0.668	0.768	0.7	0.673	0.702	0.72	0.72	0.715	0.774	0.777	0.729	0.702	0.658	0.693	0.705	0.69	0.689	0.697	0.688	0.698	0.685	0.678	0.7
15:55:09	28.3	0.09	0.089	0.091	0.089	0.089	0.092	0.088	0.091	0.096	0.691	0.692	0.701	0.683	0.696	0.72	0.725	0.73	0.743	0.693	0.689	0.682	0.686	0.753	0.746	0.788	0.669	0.769	0.701	0.674	0.702	0.719	0.72	0.715	0.773	0.776	0.73	0.703	0.657	0.693	0.706	0.69	0.69	0.697	0.687	0.701	0.686	0.675	0.699
16:00:09	28.3	0.09	0.089	0.091	0.089	0.089	0.092	0.088	0.091	0.096	0.692	0.693	0.701	0.683	0.697	0.72	0.726	0.73	0.744	0.692	0.689	0.682	0.684	0.752	0.746	0.79	0.669	0.769	0.704	0.674	0.701	0.715	0.721	0.714	0.774	0.776	0.73	0.704	0.657	0.692	0.705	0.689	0.689	0.695	0.687	0.7	0.685	0.673	0.7
16:05:09	28.3	0.09	0.09	0.091	0.089	0.089	0.092	0.088	0.091	0.096	0.692	0.694	0.7	0.684	0.698	0.72	0.724	0.733	0.744	0.691	0.688	0.681	0.684	0.754	0.747	0.79	0.669	0.769	0.707	0.673	0.7	0.717	0.722	0.715	0.778	0.779	0.729	0.703	0.659	0.692	0.706	0.689	0.691	0.697	0.689	0.702	0.685	0.677	0.699
16:10:09	28.3	0.09	0.089	0.091	0.089	0.089	0.092	0.088	0.091	0.096	0.693	0.694	0.7	0.684	0.698	0.721	0.725	0.734	0.743	0.692	0.689	0.681	0.687	0.756	0.746	0.791	0.672	0.769	0.709	0.674	0.7	0.72	0.724	0.716	0.781	0.778	0.73	0.703	0.659	0.693	0.705	0.689	0.691	0.697	0.69	0.699	0.686	0.678	0.701
16:15:09	28.3	0.09	0.09	0.092	0.089	0.089	0.092	0.088	0.091	0.096	0.695	0.696	0.7	0.686	0.699	0.721	0.728	0.735	0.744	0.696	0.69	0.681	0.69	0.757	0.746	0.791	0.671	0.77	0.71	0.674	0.699	0.722	0.725	0.719	0.781	0.78	0.731	0.703	0.659	0.694	0.705	0.689	0.694	0.696	0.689	0.701	0.685	0.678	0.701
16:20:09	28.3	0.09	0.09	0.092	0.089	0.089	0.092	0.088	0.091	0.096	0.695	0.696	0.699	0.687	0.7	0.723	0.728	0.735	0.745	0.697	0.691	0.681	0.693	0.758	0.748	0.795	0.671	0.771	0.712	0.674	0.699	0.723	0.729	0.718	0.783	0.781	0.734	0.703	0.66	0.694	0.705	0.691	0.693	0.696	0.69	0.704	0.686	0.678	0.702
16:25:09	28.3	0.09	0.09	0.091	0.089	0.089	0.092	0.088	0.091	0.096	0.696	0.697	0.7	0.688	0.701	0.721	0.729	0.736	0.745	0.699	0.691	0.681	0.692	0.761	0.747	0.79	0.672	0.771	0.71	0.673	0.698	0.722	0.73	0.717	0.785	0.781	0.731	0.703	0.66	0.695	0.704	0.691	0.692	0.698	0.691	0.704	0.686	0.676	0.702
16:30:09	28.3	0.09	0.09	0.091	0.089	0.089	0.092	0.088	0.091	0.096	0.696	0.697	0.7	0.689	0.703	0.722	0.731	0.738	0.746	0.702	0.691	0.68	0.692	0.762	0.748	0.793	0.671	0.772	0.708	0.673	0.699	0.724	0.733	0.717	0.787	0.782	0.733	0.705	0.659	0.695	0.704	0.69	0.695	0.697	0.692	0.705	0.688	0.678	0.702
16:35:09	28.3	0.09	0.09	0.091	0.089	0.089	0.092	0.088	0.091	0.096	0.695	0.698	0.699	0.69	0.703	0.723	0.73	0.734	0.748	0.704	0.689	0.68	0.691	0.761	0.75	0.792	0.672	0.772	0.707	0.672	0.698	0.721	0.731	0.719	0.786	0.782	0.735	0.704	0.66	0.696	0.703	0.691	0.695	0.699	0.694	0.705	0.686	0.677	0.703
16:40:09	28.3	0.09	0.09	0.091	0.089	0.089	0.092	0.088	0.091	0.096	0.697	0.699	0.7	0.691	0.703	0.725	0.731	0.737	0.746	0.705	0.689	0.679	0.692	0.762	0.749	0.798	0.674	0.773	0.704	0.672	0.698	0.721	0.733	0.719	0.789	0.783	0.733	0.705	0.661	0.698	0.703	0.692	0.696	0.7	0.695	0.707	0.687	0.678	0.704
16:45:09	28.3	0.09	0.09	0.092	0.09	0.089	0.092	0.088	0.091	0.096	0.698	0.699	0.7	0.692	0.703	0.726	0.732	0.74	0.747	0.704	0.689	0.68	0.693	0.761	0.749	0.796	0.675	0.773	0.71	0.672	0.698	0.722	0.732	0.718	0.788	0.783	0.732	0.706	0.662	0.698	0.704	0.691	0.698	0.7	0.696	0.709	0.689	0.68	0.703
16:50:09	28.3	0.09	0.09	0.092	0.09	0.089	0.092	0.088	0.091	0.096	0.701	0.7	0.701	0.693	0.704	0.726	0.732	0.742	0.748	0.703	0.688	0.68	0.693	0.762	0.75	0.8	0.675	0.774	0.712	0.671	0.696	0.722	0.733	0.719	0.79	0.784	0.731	0.707	0.661	0.697	0.705	0.692	0.699	0.698	0.695	0.707	0.69	0.68	0.704
16:55:09	28.3	0.09	0.09	0.091	0.089	0.089	0.092	0.088	0.091	0.096	0.701	0.7	0.702	0.694	0.704	0.725	0.734	0.737	0.748	0.702	0.689	0.68	0.693	0.764	0.751	0.798	0.676	0.773	0.716	0.671	0.696	0.723	0.734	0.719	0.792	0.785	0.732	0.706	0.661	0.699	0.704	0.693	0.697	0.699	0.696	0.708	0.689	0.68	0.704
17:00:09	28.3	0.09	0.09	0.091	0.089	0.089	0.092	0.088	0.091	0.096	0.701	0.701	0.702	0.695	0.706	0.726	0.734	0.743	0.748	0.701	0.689	0.68	0.696	0.765	0.751	0.806	0.677	0.774	0.717	0.671	0.695	0.724	0.734	0.72	0.798	0.787	0.733	0.707	0.662	0.699	0.705	0.694	0.7	0.699	0.697	0.709	0.69	0.68	0.705
17:05:09	28.3	0.09	0.09	0.092	0.089	0.089	0.092	0.088	0.091	0.096	0.701	0.701	0.703	0.697	0.707	0.728	0.735	0.742	0.748	0.702	0.688	0.682	0.696	0.765	0.751	0.809	0.677	0.776	0.717	0.672	0.694	0.729	0.735	0.72	0.799	0.786	0.733	0.707	0.662	0.701	0.705	0.696	0.697	0.699	0.697	0.71	0.69	0.68	0.704
17:10:09	28.3	0.09	0.09	0.092	0.089	0.089	0.092	0.088	0.091	0.096	0.702	0.7	0.704	0.698	0.707	0.728	0.735	0.742	0.749	0.704	0.689	0.682	0.703	0.766	0.752	0.807	0.677	0.776	0.717	0.672	0.696	0.726	0.737	0.722	0.797	0.788	0.735	0.706	0.663	0.702	0.706	0.696	0.699	0.701	0.699	0.709	0.69	0.682	0.705
17:15:09	28.3	0.09	0.089	0.091	0.089	0.089	0.092	0.088	0.091	0.096	0.702	0.704	0.705	0.698	0.709	0.729	0.735	0.744	0.75	0.707	0.689	0.682	0.702	0.766	0.752	0.806	0.677	0.776	0.718	0.672	0.696	0.726	0.738	0.723	0.799	0.787	0.736	0.707	0.663	0.702	0.706	0.696	0.701	0.702	0.699	0.712	0.691	0.681	0.705
17:20:09	28.3	0.09	0.09	0.091	0.089	0.089	0.092	0.088	0.091	0.096	0.703	0.704	0.705	0.699	0.709	0.73	0.736	0.743	0.75	0.708	0.689	0.682	0.704	0.765	0.751	0.81	0.679	0.775	0.715	0.672	0.697	0.728	0.739	0.724	0.802	0.788	0.734	0.708	0.664	0.703	0.706	0.695	0.702	0.702	0.698	0.712	0.691	0.68	0.705
17:25:09	28.3	0.09	0.09	0.092	0.089	0.089	0.092	0.088	0.091	0.096	0.703	0.704	0.706	0.699	0.71	0.731	0.738	0.746	0.751	0.709	0.689	0.682	0.709	0.766	0.752	0.813	0.681	0.776	0.715	0.672	0.698	0.728	0.741	0.726	0.804	0.788	0.735	0.709	0.665	0.704	0.707	0.697	0.702	0.703	0.7	0.714	0.692	0.682	0.705
17:30:09	28.3	0.09	0.09	0.092	0.089	0.089	0.092	0.088	0.091	0.096	0.704	0.706	0.707	0.701	0.711	0.732	0.738	0.747	0.752	0.71	0.688	0.683	0.71	0.765	0.753	0.815	0.68	0.777	0.713	0.672	0.699	0.728	0.744	0.726	0.802	0.788	0.736	0.709	0.665	0.705	0.708	0.697	0.702	0.703	0.701	0.716	0.693	0.682	0.705
17:35:09	28.3	0.09	0.09	0.091	0.089	0.089	0.092	0.088	0.091	0.096	0.704	0.706	0.707	0.701	0.711	0.732	0.739	0.746	0.753	0.71	0.689	0.684	0.708	0.765	0.753	0.815	0.681	0.778	0.716	0.672	0.697	0.728	0.744	0.726	0.804	0.789	0.736	0.711	0.666	0.705	0.707	0.697	0.702	0.702	0.702	0.713	0.695	0.682	0.706
17:40:09	28.3	0.09	0.09	0.091	0.089	0.089	0.092	0.088	0.091	0.096	0.706	0.707	0.709	0.702	0.712	0.734	0.74	0.747	0.754	0.71	0.688	0.685	0.709	0.764	0.754	0.816	0.681	0.779	0.716	0.672	0.697	0.731	0.745	0.727	0.81	0.79	0.737	0.712	0.666	0.707	0.709	0.698	0.703	0.701	0.703	0.717	0.696	0.685	0.707
17:45:09	28.3	0.09	0.09	0.092	0.089	0.089	0.092	0.088	0.091	0.096	0.707	0.71	0.711	0.702	0.713	0.734	0.74	0.748	0.754	0.708	0.688	0.685	0.711	0.764	0.755	0.817	0.681	0.778	0.716	0.672	0.697	0.733	0.744	0.728	0.81	0.791	0.735	0.712	0.668	0.707	0.709	0.699	0.704	0.703	0.704	0.717	0.694	0.686	0.706
17:50:09	28.3	0.09	0.09	0.092	0.089	0.089	0.092	0.088	0.091	0.096	0.708	0.711	0.713	0.705	0.713	0.735	0.741	0.749	0.753	0.703	0.689	0.686	0.713	0.765	0.756	0.818	0.681	0.777	0.717	0.671	0.696	0.73	0.745	0.727	0.811	0.79	0.739	0.713	0.668	0.707	0.71	0.701	0.705	0.704	0.706	0.719	0.696	0.681	0.707
17:55:09	28.3	0.09	0.09	0.092	0.089	0.089	0.092	0.088	0.091	0.096	0.708	0.712	0.712	0.706	0.714	0.735	0.741	0.75	0.754	0.703	0.689	0.686	0.715	0.765	0.756	0.823	0.683	0.779	0.718	0.671	0.697	0.73	0.744	0.729	0.81	0.791	0.741	0.714	0.669	0.709	0.711	0.702	0.707	0.704	0.706	0.719	0.697	0.684	0.707
18:00:09	28.3	0.09	0.09	0.091	0.089	0.089	0.092	0.088	0.091	0.096	0.709	0.714	0.713	0.706	0.714	0.737	0.742	0.749	0.755	0.702	0.69	0.687	0.715	0.766	0.756	0.822	0.683	0.779	0.719	0.671	0.698	0.731	0.745	0.73	0.809	0.792	0.741	0.714	0.669	0.71	0.711	0.702	0.709	0.702	0.706	0.721	0.697	0.683	0.708
18:05:09	28.3	0.09	0.09	0.092	0.089	0.089	0.092	0.088	0.091	0.096	0.71	0.714	0.714	0.708	0.716	0.738	0.743	0.752	0.756	0.703	0.691	0.687	0.715	0.768	0.757	0.822	0.685	0.779	0.719	0.671	0.698	0.733	0.745	0.729	0.812	0.793	0.74	0.715	0.671	0.711	0.711	0.703	0.711	0.703	0.707	0.719	0.696	0.684	0.707
18:10:09	28.3	0.09	0.089	0.091	0.089	0.089	0.092	0.088	0.091	0.096	0.71	0.714	0.714	0.709	0.718	0.738	0.744	0.753	0.756	0.701	0.691	0.686	0.717	0.768	0.758	0.821	0.684	0.781	0.72	0.671	0.7	0.738	0.743	0.731	0.817	0.793	0.744	0.716	0.672	0.712	0.711	0.704	0.711	0.707	0.708	0.72	0.698	0.687	0.709
18:15:09	28.3	0.09	0.09	0.092	0.089	0.089	0.092	0.088	0.091	0.096	0.712	0.715	0.715	0.71	0.719	0.74	0.745	0.752	0.757	0.702	0.692	0.686	0.716	0.768	0.759	0.827	0.686	0.78	0.718	0.67	0.7	0.742	0.743	0.731	0.819	0.793	0.742	0.717	0.672	0.712	0.713	0.705	0.713	0.706	0.709	0.723	0.7	0.689	0.708
18:20:09	28.3	0.09	0.09	0.092	0.089	0.089	0.092	0.088	0.091	0.096	0.712	0.716	0.716	0.712	0.719	0.74	0.745	0.753	0.757	0.702	0.691	0.687	0.72	0.766	0.759	0.825	0.687	0.782	0.715	0.671	0.699	0.744	0.743	0.732	0.816	0.793	0.743	0.718	0.673	0.712	0.713	0.705	0.714	0.707	0.711	0.724	0.701	0.688	0.71
18:25:09	28.3	0.09	0.089	0.091	0.089	0.089	0.092	0.088	0.091	0.096	0.712	0.718	0.716	0.713	0.72	0.742	0.746	0.753	0.759	0.702	0.691	0.688	0.721	0.768	0.76	0.825	0.688	0.783	0.716	0.67	0.699	0.744	0.744	0.732	0.814	0.795	0.744	0.719	0.674	0.713	0.714	0.706	0.714	0.707	0.71	0.724	0.702	0.688	0.711
18:30:09	28.3	0.09	0.09	0.091	0.089	0.089	0.092	0.088	0.091	0.096	0.714	0.719	0.716	0.715	0.721	0.744	0.747	0.753	0.759	0.704	0.691	0.69	0.722	0.768	0.76	0.826	0.687	0.783	0.716	0.671	0.699	0.742	0.746	0.735	0.816	0.795	0.745	0.72	0.676	0.714	0.715	0.707	0.716	0.708	0.712	0.724	0.702	0.691	0.711
18:35:09	28.3	0.09	0.089	0.091	0.089	0.089	0.091	0.088	0.091	0.095	0.715	0.72	0.717	0.716	0.723	0.744	0.749	0.753	0.759	0.705	0.691	0.691	0.719	0.769	0.761	0.828	0.689	0.782	0.716	0.671	0.701	0.744	0.747	0.736	0.816	0.795	0.746	0.721	0.676	0.714	0.715	0.708	0.715	0.71	0.713	0.727	0.703	0.691	0.712
18:40:09	28.3	0.09	0.089	0.091	0.089	0.089	0.092	0.088	0.091	0.096	0.715	0.722	0.716	0.717	0.723	0.746	0.75	0.754	0.76	0.707	0.692	0.692	0.719	0.77	0.763	0.831	0.689	0.785	0.715	0.672	0.702	0.746	0.748	0.736	0.82	0.798	0.747	0.723	0.678	0.716	0.716	0.709	0.717	0.708	0.713	0.727	0.704	0.691	0.713
18:45:09	28.3	0.09	0.09	0.091	0.089	0.089	0.092	0.088	0.091	0.096	0.716	0.723	0.718	0.719	0.724	0.746	0.751	0.755	0.761	0.708	0.693	0.694	0.725	0.771	0.763	0.831	0.689	0.785	0.715	0.672	0.701	0.747	0.747	0.736	0.822	0.797	0.747	0.724	0.679	0.716	0.717	0.71	0.719	0.711	0.714	0.727	0.705	0.692	0.714
18:50:09	28.3	0.09	0.09	0.091	0.089	0.089	0.092	0.088	0.091	0.095	0.717	0.722	0.719	0.72	0.726	0.748	0.752	0.755	0.762	0.708	0.695	0.695	0.728	0.773	0.765	0.829	0.691	0.786	0.714	0.672	0.703	0.749	0.745	0.738	0.824	0.796	0.748	0.727	0.68	0.717	0.718	0.711	0.719	0.713	0.715	0.728	0.706	0.691	0.715
18:55:09	28.3	0.09	0.09	0.091	0.089	0.089	0.092	0.088	0.091	0.095	0.718	0.722	0.721	0.722	0.728	0.749	0.753	0.757	0.764	0.709	0.695	0.696	0.73	0.773	0.766	0.835	0.692	0.787	0.714	0.673	0.704	0.75	0.747	0.738	0.824	0.799	0.749	0.728	0.681	0.718	0.719	0.712	0.721	0.711	0.716	0.729	0.707	0.693	0.716
19:00:09	28.3	0.09	0.09	0.091	0.089	0.089	0.092	0.088	0.091	0.095	0.72	0.724	0.724	0.723	0.729	0.75	0.755	0.756	0.765	0.709	0.695	0.697	0.732	0.774	0.767	0.835	0.692	0.789	0.713	0.674	0.705	0.75	0.752	0.74	0.826	0.799	0.749	0.728	0.682	0.72	0.72	0.713	0.72	0.714	0.717	0.731	0.709	0.694	0.716
19:05:09	28.3	0.09	0.09	0.091	0.089	0.089	0.091	0.088	0.091	0.095	0.722	0.725	0.724	0.723	0.73	0.75	0.756	0.758	0.764	0.709	0.696	0.698	0.731	0.774	0.769	0.836	0.693	0.789	0.715	0.675	0.705	0.75	0.75	0.741	0.825	0.798	0.752	0.73	0.683	0.72	0.721	0.713	0.72	0.714	0.718	0.73	0.71	0.695	0.718
19:10:09	28.3	0.09	0.09	0.092	0.089	0.089	0.092	0.088	0.091	0.095	0.722	0.725	0.725	0.725	0.732	0.751	0.757	0.755	0.767	0.708	0.699	0.698	0.729	0.776	0.769	0.835	0.693	0.79	0.718	0.676	0.707	0.751	0.749	0.743	0.828	0.8	0.751	0.731	0.684	0.72	0.722	0.714	0.721	0.715	0.719	0.732	0.712	0.696	0.718
19:15:09	28.3	0.09	0.09	0.091	0.089	0.089	0.092	0.088	0.091	0.095	0.724	0.726	0.726	0.726	0.733	0.751	0.758	0.759	0.767	0.709	0.701	0.698	0.731	0.776	0.771	0.837	0.692	0.791	0.716	0.676	0.708	0.746	0.751	0.743	0.828	0.8	0.753	0.732	0.686	0.72	0.722	0.716	0.72	0.716	0.721	0.733	0.713	0.696	0.719
19:20:09	28.3	0.09	0.09	0.091	0.089	0.089	0.092	0.088	0.091	0.095	0.725	0.726	0.728	0.727	0.735	0.753	0.759	0.759	0.767	0.709	0.702	0.697	0.732	0.778	0.771	0.838	0.694	0.79	0.716	0.676	0.709	0.748	0.751	0.743	0.828	0.798	0.754	0.734	0.687	0.721	0.724	0.717	0.723	0.716	0.721	0.733	0.714	0.696	0.72
19:25:09	28.3	0.09	0.09	0.092	0.089	0.089	0.092	0.088	0.091	0.095	0.727	0.726	0.73	0.728	0.736	0.754	0.76	0.762	0.768	0.708	0.702	0.698	0.724	0.779	0.772	0.837	0.695	0.791	0.717	0.677	0.71	0.748	0.751	0.745	0.828	0.803	0.754	0.734	0.688	0.723	0.724	0.718	0.723	0.717	0.721	0.733	0.715	0.699	0.721
19:30:09	28.3	0.09	0.09	0.091	0.089	0.089	0.092	0.088	0.091	0.095	0.729	0.726	0.731	0.729	0.737	0.755	0.761	0.76	0.769	0.708	0.704	0.698	0.731	0.779	0.772	0.836	0.696	0.793	0.716	0.677	0.71	0.75	0.752	0.745	0.829	0.8	0.757	0.735	0.688	0.724	0.726	0.72	0.724	0.718	0.722	0.735	0.715	0.7	0.721
19:35:09	28.3	0.09	0.09	0.092	0.089	0.089	0.092	0.088	0.091	0.095	0.731	0.729	0.732	0.73	0.739	0.757	0.763	0.762	0.771	0.708	0.704	0.698	0.736	0.781	0.774	0.837	0.697	0.793	0.717	0.678	0.711	0.751	0.752	0.747	0.832	0.801	0.758	0.737	0.69	0.726	0.727	0.721	0.725	0.718	0.722	0.737	0.717	0.701	0.723
19:40:09	28.3	0.09	0.09	0.092	0.089	0.089	0.092	0.088	0.091	0.095	0.732	0.729	0.733	0.731	0.74	0.758	0.765	0.762	0.77	0.71	0.706	0.698	0.737	0.781	0.774	0.838	0.698	0.793	0.717	0.679	0.71	0.752	0.752	0.747	0.829	0.804	0.758	0.739	0.69	0.727	0.728	0.722	0.726	0.718	0.724	0.738	0.719	0.701	0.723
19:45:09	28.3	0.09	0.09	0.091	0.089	0.089	0.092	0.088	0.091	0.095	0.733	0.732	0.733	0.733	0.74	0.76	0.766	0.764	0.771	0.71	0.705	0.698	0.741	0.782	0.774	0.839	0.699	0.793	0.717	0.68	0.709	0.753	0.753	0.746	0.832	0.803	0.758	0.739	0.692	0.727	0.729	0.723	0.728	0.719	0.726	0.738	0.72	0.701	0.723
19:50:09	28.3	0.09	0.09	0.091	0.089	0.089	0.092	0.088	0.091	0.095	0.734	0.734	0.735	0.734	0.741	0.762	0.765	0.765	0.773	0.711	0.707	0.7	0.74	0.782	0.776	0.84	0.701	0.794	0.718	0.68	0.711	0.751	0.752	0.747	0.833	0.802	0.761	0.74	0.693	0.73	0.731	0.725	0.73	0.72	0.727	0.738	0.722	0.703	0.725
19:55:09	28.3	0.09	0.09	0.091	0.089	0.089	0.092	0.088	0.091	0.095	0.735	0.735	0.736	0.736	0.742	0.763	0.766	0.766	0.774	0.713	0.707	0.703	0.741	0.784	0.778	0.842	0.702	0.796	0.718	0.681	0.712	0.752	0.757	0.748	0.835	0.807	0.763	0.74	0.694	0.731	0.731	0.726	0.731	0.721	0.728	0.74	0.722	0.702	0.726
20:00:09	28.3	0.09	0.09	0.091	0.089	0.089	0.092	0.088	0.091	0.095	0.735	0.736	0.737	0.738	0.743	0.763	0.769	0.768	0.776	0.714	0.708	0.705	0.74	0.784	0.778	0.841	0.702	0.797	0.719	0.682	0.714	0.754	0.755	0.749	0.835	0.808	0.763	0.741	0.696	0.732	0.732	0.726	0.732	0.722	0.727	0.74	0.725	0.702	0.726
20:05:09	28.3	0.09	0.09	0.091	0.089	0.089	0.092	0.088	0.091	0.095	0.736	0.737	0.737	0.741	0.744	0.765	0.77	0.77	0.778	0.714	0.709	0.706	0.743	0.785	0.779	0.842	0.702	0.798	0.721	0.683	0.714	0.754	0.756	0.751	0.837	0.808	0.765	0.742	0.696	0.733	0.733	0.728	0.734	0.722	0.729	0.741	0.726	0.702	0.727
20:10:09	28.3	0.09	0.09	0.091	0.089	0.089	0.092	0.088	0.091	0.095	0.737	0.738	0.737	0.742	0.745	0.766	0.771	0.771	0.777	0.714	0.709	0.709	0.743	0.785	0.78	0.842	0.703	0.799	0.722	0.684	0.714	0.753	0.758	0.752	0.836	0.808	0.764	0.743	0.697	0.734	0.734	0.729	0.735	0.723	0.73	0.743	0.728	0.701	0.729
20:15:09	28.3	0.09	0.09	0.092	0.089	0.089	0.092	0.088	0.091	0.095	0.738	0.739	0.738	0.744	0.747	0.768	0.772	0.771	0.778	0.715	0.711	0.71	0.745	0.786	0.782	0.843	0.704	0.8	0.723	0.686	0.716	0.756	0.758	0.755	0.837	0.81	0.766	0.745	0.698	0.735	0.736	0.73	0.736	0.723	0.732	0.745	0.729	0.701	0.729
20:20:09	28.3	0.09	0.09	0.091	0.089	0.089	0.092	0.088	0.091	0.095	0.738	0.74	0.74	0.745	0.748	0.769	0.772	0.772	0.779	0.715	0.713	0.711	0.745	0.787	0.783	0.844	0.706	0.801	0.724	0.687	0.715	0.756	0.758	0.757	0.839	0.807	0.767	0.747	0.699	0.736	0.737	0.731	0.739	0.724	0.732	0.745	0.73	0.702	0.73
20:25:09	28.3	0.09	0.09	0.091	0.089	0.089	0.091	0.088	0.091	0.095	0.74	0.742	0.741	0.747	0.751	0.77	0.775	0.773	0.781	0.715	0.715	0.711	0.744	0.789	0.784	0.845	0.707	0.801	0.725	0.688	0.717	0.755	0.758	0.758	0.836	0.811	0.767	0.747	0.7	0.738	0.738	0.732	0.738	0.724	0.732	0.746	0.731	0.702	0.732
20:30:09	28.3	0.09	0.089	0.091	0.089	0.089	0.091	0.088	0.091	0.095	0.741	0.744	0.743	0.748	0.752	0.773	0.775	0.773	0.781	0.715	0.715	0.713	0.744	0.791	0.786	0.844	0.707	0.802	0.727	0.688	0.718	0.755	0.759	0.759	0.839	0.814	0.769	0.749	0.702	0.739	0.739	0.733	0.74	0.726	0.732	0.747	0.731	0.703	0.734
20:35:09	28.3	0.09	0.09	0.091	0.089	0.089	0.092	0.088	0.091	0.095	0.742	0.746	0.744	0.75	0.754	0.773	0.776	0.774	0.782	0.716	0.716	0.714	0.743	0.792	0.788	0.845	0.708	0.804	0.727	0.69	0.72	0.757	0.759	0.761	0.839	0.814	0.769	0.75	0.703	0.741	0.739	0.734	0.741	0.727	0.735	0.748	0.732	0.704	0.734
20:40:09	28.3	0.09	0.09	0.091	0.089	0.089	0.092	0.088	0.091	0.095	0.744	0.747	0.746	0.751	0.755	0.774	0.777	0.774	0.784	0.716	0.717	0.713	0.745	0.793	0.788	0.845	0.708	0.804	0.729	0.692	0.722	0.757	0.76	0.762	0.839	0.814	0.771	0.751	0.704	0.742	0.741	0.736	0.742	0.727	0.737	0.748	0.735	0.703	0.735
20:45:09	28.3	0.09	0.09	0.091	0.089	0.089	0.091	0.088	0.091	0.095	0.746	0.748	0.747	0.752	0.756	0.776	0.779	0.776	0.783	0.716	0.718	0.713	0.746	0.795	0.788	0.846	0.709	0.806	0.73	0.693	0.724	0.756	0.761	0.763	0.84	0.814	0.772	0.752	0.705	0.742	0.742	0.736	0.742	0.729	0.736	0.751	0.735	0.703	0.736
20:50:09	28.3	0.09	0.09	0.091	0.089	0.089	0.092	0.088	0.091	0.095	0.747	0.749	0.749	0.753	0.758	0.778	0.781	0.776	0.785	0.716	0.719	0.714	0.746	0.796	0.789	0.848	0.71	0.806	0.731	0.695	0.726	0.757	0.762	0.763	0.842	0.815	0.772	0.754	0.707	0.742	0.744	0.737	0.744	0.732	0.739	0.752	0.736	0.703	0.738
20:55:09	28.3	0.09	0.089	0.091	0.089	0.089	0.091	0.088	0.091	0.095	0.75	0.75	0.751	0.754	0.759	0.778	0.782	0.777	0.788	0.717	0.722	0.714	0.751	0.797	0.79	0.85	0.71	0.807	0.732	0.696	0.727	0.758	0.764	0.765	0.841	0.814	0.773	0.756	0.708	0.744	0.745	0.738	0.746	0.731	0.74	0.752	0.738	0.704	0.739
21:00:09	28.3	0.09	0.09	0.091	0.089	0.089	0.092	0.088	0.091	0.095	0.752	0.75	0.753	0.755	0.761	0.779	0.783	0.779	0.788	0.718	0.722	0.714	0.751	0.799	0.792	0.851	0.711	0.808	0.734	0.697	0.728	0.758	0.765	0.768	0.842	0.816	0.775	0.758	0.709	0.744	0.747	0.74	0.747	0.731	0.74	0.753	0.74	0.705	0.74
21:05:09	28.3	0.09	0.089	0.091	0.089	0.089	0.092	0.088	0.091	0.095	0.753	0.751	0.755	0.756	0.763	0.781	0.783	0.778	0.789	0.719	0.724	0.715	0.75	0.8	0.792	0.851	0.712	0.808	0.735	0.698	0.729	0.758	0.766	0.768	0.843	0.819	0.775	0.76	0.71	0.746	0.748	0.741	0.748	0.731	0.742	0.754	0.742	0.706	0.741
21:10:09	28.3	0.09	0.09	0.091	0.089	0.089	0.092	0.088	0.091	0.095	0.755	0.752	0.756	0.758	0.764	0.782	0.784	0.781	0.789	0.72	0.725	0.717	0.748	0.801	0.794	0.853	0.713	0.809	0.735	0.699	0.73	0.76	0.767	0.767	0.844	0.82	0.777	0.761	0.712	0.747	0.75	0.742	0.749	0.734	0.743	0.755	0.743	0.707	0.742
21:15:09	28.3	0.09	0.089	0.091	0.089	0.089	0.091	0.088	0.091	0.095	0.757	0.752	0.757	0.759	0.765	0.784	0.786	0.782	0.791	0.72	0.725	0.718	0.749	0.803	0.795	0.852	0.712	0.811	0.736	0.701	0.73	0.76	0.767	0.768	0.845	0.818	0.779	0.761	0.713	0.748	0.751	0.743	0.751	0.736	0.744	0.757	0.744	0.705	0.743
21:20:08	28.3	0.09	0.09	0.091	0.089	0.089	0.092	0.088	0.091	0.095	0.758	0.753	0.758	0.759	0.766	0.785	0.787	0.783	0.794	0.721	0.727	0.721	0.749	0.804	0.796	0.851	0.714	0.811	0.738	0.702	0.732	0.761	0.768	0.769	0.845	0.821	0.779	0.763	0.714	0.749	0.752	0.745	0.752	0.735	0.745	0.757	0.746	0.706	0.744
21:25:09	28.3	0.09	0.09	0.092	0.089	0.089	0.092	0.088	0.091	0.095	0.76	0.755	0.759	0.761	0.768	0.787	0.786	0.784	0.792	0.722	0.728	0.723	0.749	0.804	0.798	0.853	0.715	0.812	0.74	0.703	0.733	0.763	0.769	0.77	0.844	0.822	0.78	0.763	0.716	0.75	0.753	0.746	0.754	0.735	0.747	0.759	0.747	0.706	0.745
21:30:09	28.3	0.09	0.09	0.091	0.089	0.089	0.092	0.088	0.091	0.095	0.761	0.756	0.76	0.762	0.768	0.789	0.788	0.786	0.794	0.722	0.729	0.723	0.75	0.804	0.799	0.855	0.716	0.813	0.74	0.704	0.734	0.763	0.77	0.773	0.846	0.821	0.781	0.763	0.716	0.75	0.754	0.747	0.754	0.738	0.748	0.759	0.747	0.708	0.746
21:35:09	28.3	0.09	0.089	0.091	0.089	0.089	0.092	0.088	0.091	0.095	0.762	0.757	0.761	0.763	0.769	0.79	0.79	0.787	0.795	0.724	0.732	0.726	0.752	0.806	0.8	0.855	0.716	0.814	0.74	0.706	0.736	0.763	0.771	0.774	0.846	0.823	0.782	0.765	0.718	0.752	0.755	0.748	0.756	0.739	0.749	0.76	0.749	0.708	0.747
21:40:09	28.3	0.09	0.089	0.091	0.089	0.089	0.092	0.088	0.091	0.095	0.763	0.759	0.761	0.764	0.771	0.792	0.79	0.789	0.796	0.725	0.732	0.727	0.752	0.808	0.8	0.857	0.717	0.818	0.741	0.707	0.737	0.764	0.772	0.776	0.846	0.823	0.784	0.767	0.718	0.753	0.756	0.748	0.757	0.739	0.75	0.762	0.75	0.709	0.748
21:45:09	28.3	0.09	0.09	0.091	0.089	0.089	0.092	0.088	0.091	0.095	0.765	0.761	0.763	0.766	0.773	0.795	0.791	0.79	0.8	0.725	0.733	0.729	0.753	0.808	0.801	0.857	0.717	0.818	0.743	0.708	0.738	0.765	0.773	0.776	0.848	0.826	0.785	0.77	0.72	0.754	0.757	0.75	0.758	0.741	0.751	0.763	0.752	0.709	0.749
21:50:09	28.3	0.09	0.09	0.091	0.089	0.089	0.092	0.088	0.091	0.095	0.766	0.761	0.764	0.767	0.775	0.795	0.792	0.791	0.8	0.726	0.734	0.729	0.754	0.809	0.803	0.855	0.718	0.817	0.742	0.71	0.739	0.765	0.774	0.778	0.849	0.827	0.786	0.771	0.721	0.756	0.758	0.75	0.76	0.742	0.753	0.764	0.753	0.71	0.749
21:55:09	28.3	0.09	0.09	0.091	0.089	0.089	0.092	0.088	0.091	0.095	0.767	0.762	0.765	0.768	0.776	0.796	0.792	0.792	0.8	0.727	0.735	0.731	0.754	0.81	0.804	0.856	0.72	0.819	0.744	0.71	0.742	0.767	0.775	0.78	0.85	0.826	0.786	0.772	0.722	0.757	0.758	0.75	0.76	0.743	0.753	0.765	0.755	0.711	0.749
22:00:09	28.3	0.09	0.09	0.091	0.089	0.089	0.092	0.088	0.091	0.095	0.768	0.764	0.767	0.77	0.777	0.797	0.794	0.793	0.802	0.727	0.737	0.733	0.757	0.812	0.806	0.86	0.721	0.822	0.745	0.712	0.743	0.768	0.776	0.78	0.85	0.83	0.788	0.773	0.725	0.759	0.76	0.753	0.763	0.743	0.755	0.766	0.756	0.712	0.751
22:05:09	28.3	0.09	0.09	0.091	0.089	0.089	0.091	0.088	0.091	0.095	0.77	0.765	0.767	0.772	0.778	0.797	0.795	0.796	0.801	0.727	0.739	0.735	0.757	0.814	0.807	0.86	0.721	0.821	0.745	0.714	0.744	0.768	0.777	0.781	0.851	0.83	0.79	0.775	0.725	0.76	0.762	0.753	0.763	0.744	0.755	0.767	0.757	0.714	0.752
22:10:09	28.3	0.09	0.09	0.091	0.089	0.089	0.092	0.088	0.091	0.095	0.771	0.766	0.768	0.773	0.78	0.798	0.795	0.797	0.803	0.729	0.74	0.736	0.759	0.815	0.809	0.858	0.723	0.825	0.745	0.715	0.745	0.768	0.778	0.781	0.852	0.833	0.79	0.777	0.726	0.761	0.763	0.754	0.764	0.744	0.757	0.767	0.759	0.714	0.753
22:15:09	28.3	0.09	0.09	0.091	0.089	0.089	0.092	0.088	0.091	0.095	0.772	0.768	0.769	0.774	0.781	0.799	0.797	0.799	0.805	0.729	0.742	0.736	0.76	0.816	0.81	0.86	0.723	0.824	0.747	0.716	0.747	0.77	0.78	0.783	0.853	0.831	0.791	0.779	0.727	0.762	0.764	0.754	0.766	0.746	0.759	0.769	0.76	0.714	0.754
22:20:09	28.3	0.09	0.089	0.091	0.089	0.089	0.091	0.088	0.09	0.095	0.773	0.769	0.771	0.775	0.782	0.8	0.799	0.8	0.804	0.731	0.742	0.737	0.76	0.817	0.811	0.859	0.724	0.823	0.749	0.717	0.747	0.771	0.781	0.784	0.853	0.831	0.792	0.781	0.728	0.764	0.765	0.756	0.768	0.748	0.758	0.769	0.761	0.714	0.756
22:25:09	28.3	0.09	0.09	0.091	0.089	0.089	0.091	0.088	0.091	0.095	0.774	0.769	0.772	0.776	0.783	0.803	0.8	0.802	0.806	0.732	0.744	0.739	0.761	0.819	0.813	0.86	0.725	0.827	0.749	0.718	0.749	0.771	0.783	0.786	0.853	0.835	0.792	0.781	0.73	0.765	0.766	0.758	0.769	0.748	0.76	0.77	0.763	0.716	0.757
22:30:09	28.3	0.09	0.089	0.091	0.089	0.089	0.091	0.088	0.09	0.095	0.775	0.77	0.775	0.778	0.786	0.804	0.8	0.804	0.81	0.733	0.744	0.74	0.761	0.82	0.814	0.863	0.725	0.828	0.751	0.719	0.75	0.773	0.784	0.786	0.856	0.836	0.794	0.781	0.731	0.765	0.768	0.76	0.771	0.748	0.761	0.771	0.765	0.717	0.758
22:35:09	28.3	0.09	0.09	0.091	0.089	0.089	0.091	0.088	0.091	0.095	0.776	0.772	0.775	0.78	0.787	0.806	0.801	0.805	0.808	0.736	0.746	0.74	0.76	0.82	0.814	0.863	0.727	0.83	0.752	0.721	0.751	0.774	0.786	0.788	0.855	0.84	0.796	0.782	0.733	0.767	0.77	0.761	0.772	0.749	0.762	0.774	0.766	0.718	0.76
22:40:09	28.3	0.09	0.09	0.091	0.089	0.089	0.091	0.088	0.09	0.095	0.777	0.773	0.777	0.78	0.789	0.807	0.802	0.807	0.809	0.737	0.747	0.741	0.761	0.822	0.816	0.863	0.728	0.829	0.753	0.722	0.753	0.774	0.788	0.79	0.856	0.84	0.796	0.784	0.734	0.767	0.771	0.762	0.773	0.752	0.763	0.774	0.767	0.719	0.762
22:45:09	28.3	0.09	0.09	0.091	0.089	0.089	0.091	0.088	0.091	0.095	0.779	0.774	0.778	0.782	0.789	0.81	0.804	0.808	0.809	0.738	0.748	0.741	0.762	0.823	0.818	0.865	0.73	0.831	0.755	0.724	0.752	0.776	0.788	0.793	0.858	0.841	0.797	0.786	0.735	0.769	0.772	0.763	0.775	0.754	0.764	0.774	0.768	0.72	0.763
22:50:09	28.3	0.09	0.09	0.091	0.089	0.089	0.091	0.088	0.091	0.094	0.781	0.775	0.779	0.783	0.789	0.811	0.805	0.809	0.812	0.739	0.75	0.742	0.763	0.824	0.818	0.866	0.731	0.831	0.756	0.725	0.754	0.777	0.789	0.795	0.859	0.843	0.798	0.786	0.736	0.77	0.773	0.764	0.776	0.755	0.766	0.775	0.77	0.721	0.764
22:55:09	28.3	0.09	0.09	0.091	0.089	0.089	0.091	0.088	0.09	0.094	0.783	0.776	0.782	0.785	0.791	0.811	0.806	0.811	0.812	0.739	0.751	0.743	0.764	0.825	0.82	0.866	0.733	0.832	0.758	0.727	0.755	0.777	0.79	0.797	0.858	0.845	0.8	0.785	0.737	0.772	0.774	0.766	0.777	0.754	0.767	0.777	0.771	0.722	0.765
23:00:09	28.3	0.09	0.089	0.091	0.089	0.088	0.091	0.088	0.09	0.094	0.783	0.777	0.784	0.786	0.792	0.812	0.806	0.813	0.814	0.741	0.753	0.745	0.765	0.826	0.821	0.867	0.734	0.832	0.759	0.727	0.757	0.778	0.791	0.798	0.86	0.847	0.801	0.787	0.738	0.773	0.775	0.767	0.777	0.755	0.768	0.778	0.772	0.722	0.767
23:05:09	28.3	0.09	0.089	0.091	0.089	0.089	0.091	0.088	0.09	0.095	0.785	0.778	0.786	0.787	0.793	0.813	0.807	0.815	0.817	0.742	0.754	0.746	0.767	0.828	0.822	0.868	0.735	0.834	0.76	0.729	0.758	0.78	0.792	0.799	0.861	0.844	0.801	0.789	0.739	0.774	0.776	0.768	0.778	0.757	0.768	0.779	0.773	0.723	0.768
23:10:09	28.3	0.09	0.09	0.091	0.089	0.089	0.091	0.088	0.09	0.095	0.787	0.778	0.786	0.788	0.794	0.814	0.809	0.816	0.815	0.744	0.755	0.746	0.768	0.829	0.823	0.868	0.736	0.834	0.761	0.73	0.76	0.781	0.793	0.8	0.861	0.847	0.802	0.79	0.739	0.774	0.777	0.769	0.78	0.757	0.769	0.779	0.774	0.724	0.768
23:15:09	28.3	0.09	0.09	0.091	0.089	0.089	0.091	0.088	0.091	0.095	0.788	0.779	0.788	0.79	0.795	0.817	0.81	0.818	0.817	0.745	0.758	0.747	0.769	0.831	0.825	0.869	0.736	0.835	0.763	0.732	0.761	0.782	0.795	0.801	0.861	0.848	0.803	0.791	0.741	0.776	0.779	0.771	0.781	0.757	0.771	0.779	0.776	0.725	0.769
23:20:09	28.3	0.09	0.09	0.091	0.089	0.089	0.091	0.088	0.09	0.095	0.79	0.78	0.79	0.791	0.797	0.818	0.809	0.819	0.818	0.745	0.759	0.749	0.771	0.832	0.826	0.87	0.738	0.836	0.764	0.734	0.762	0.783	0.796	0.802	0.862	0.848	0.805	0.793	0.742	0.776	0.779	0.772	0.782	0.758	0.772	0.781	0.777	0.725	0.771
23:25:09	28.3	0.09	0.09	0.091	0.089	0.089	0.091	0.088	0.09	0.095	0.791	0.78	0.789	0.793	0.799	0.819	0.811	0.819	0.819	0.746	0.761	0.75	0.771	0.835	0.827	0.87	0.739	0.838	0.765	0.734	0.764	0.784	0.797	0.803	0.863	0.847	0.804	0.794	0.743	0.778	0.781	0.773	0.783	0.759	0.772	0.782	0.778	0.727	0.772
23:30:09	28.3	0.09	0.09	0.091	0.089	0.089	0.091	0.088	0.09	0.095	0.791	0.782	0.791	0.793	0.8	0.82	0.813	0.82	0.822	0.747	0.762	0.752	0.772	0.837	0.828	0.871	0.739	0.84	0.766	0.736	0.764	0.785	0.799	0.804	0.865	0.851	0.806	0.796	0.744	0.779	0.782	0.775	0.785	0.76	0.774	0.782	0.78	0.728	0.774
23:35:09	28.3	0.09	0.09	0.091	0.089	0.089	0.091	0.088	0.091	0.095	0.792	0.783	0.792	0.795	0.801	0.822	0.813	0.821	0.823	0.748	0.763	0.754	0.773	0.837	0.83	0.874	0.74	0.84	0.767	0.737	0.766	0.786	0.8	0.805	0.865	0.851	0.807	0.797	0.746	0.78	0.783	0.777	0.786	0.761	0.775	0.783	0.781	0.729	0.775
23:40:09	28.3	0.09	0.09	0.091	0.089	0.089	0.091	0.088	0.091	0.095	0.793	0.783	0.792	0.796	0.802	0.823	0.814	0.822	0.823	0.749	0.765	0.755	0.774	0.838	0.831	0.873	0.742	0.841	0.769	0.738	0.768	0.787	0.801	0.806	0.866	0.853	0.808	0.797	0.747	0.781	0.784	0.778	0.787	0.761	0.778	0.784	0.782	0.729	0.777
23:45:09	28.3	0.09	0.09	0.091	0.089	0.089	0.091	0.088	0.091	0.094	0.793	0.785	0.793	0.797	0.804	0.824	0.814	0.823	0.824	0.75	0.766	0.756	0.775	0.838	0.831	0.873	0.741	0.842	0.769	0.739	0.768	0.789	0.802	0.807	0.866	0.853	0.808	0.798	0.747	0.783	0.785	0.778	0.788	0.761	0.777	0.786	0.783	0.731	0.778
23:50:09	28.3	0.09	0.09	0.091	0.089	0.089	0.091	0.088	0.09	0.094	0.795	0.786	0.794	0.799	0.805	0.825	0.816	0.823	0.827	0.751	0.767	0.758	0.776	0.84	0.833	0.875	0.742	0.843	0.771	0.74	0.769	0.789	0.804	0.809	0.866	0.856	0.81	0.799	0.749	0.784	0.786	0.778	0.789	0.762	0.779	0.787	0.784	0.731	0.779
23:55:09	28.3	0.09	0.09	0.091	0.089	0.088	0.092	0.088	0.09	0.094	0.795	0.787	0.795	0.799	0.806	0.826	0.817	0.824	0.827	0.752	0.768	0.759	0.778	0.842	0.834	0.875	0.744	0.843	0.772	0.741	0.77	0.79	0.805	0.811	0.867	0.857	0.81	0.801	0.75	0.785	0.789	0.779	0.791	0.764	0.78	0.787	0.785	0.733	0.779
1 day, 0:00:09	28.3	0.09	0.09	0.091	0.089	0.089	0.091	0.088	0.09	0.094	0.797	0.788	0.796	0.802	0.808	0.827	0.817	0.825	0.827	0.752	0.769	0.761	0.779	0.844	0.835	0.876	0.746	0.846	0.772	0.742	0.772	0.792	0.806	0.811	0.866	0.856	0.811	0.802	0.751	0.787	0.789	0.781	0.792	0.766	0.781	0.787	0.787	0.734	0.78
	1	3	4	5	6	7	8	9	10	11
A	-0.08	0.06	-0.08	-0.06	0.08	0.06	0.06	-0.06	-0.06	-0.18
	1	1	1	1	1	1	1	1	1	1
	22:27:39	21:42:39	14:07:39	00:27:39	02:57:39	14:32:39	00:02:39	22:17:39	00:37:39	00:02:39
	22:37:39	22:01:49	13:55:09	00:26:49	02:57:39	14:45:09	00:00:09	21:41:49	00:40:09	00:00:09
	0.013	-0.014	-0.01	-0.01	0.014	-0.013	-0.01	-0.01	0.014	-0.06
	0.698	0.94	0.467	0.868	0.602	0.691	0.868	0.771	0.661	0.979
	02:57:39	02:57:39	17:57:39	21:57:39	02:57:39	18:27:39	07:37:39	23:47:39	03:02:39	01:17:39
	02:48:46	02:33:09	16:26:43	21:15:31	02:42:29	17:24:01	07:21:27	21:12:06	03:20:09	01:02:56
	-0.03	-0.03	-0.03	-0.02	0.03	-0.03	-0.03	0.03	0.04	-0.08
	0.964	0.964	0.964	0.75	0.519	0.964	0.75	0.964	0.923	0.98
	22:05:09	22:55:09	09:15:09	11:35:09	02:55:09	15:50:09	15:10:09	02:55:09	02:55:09	01:20:09
	22:12:56	22:34:02	08:59:36	11:21:49	02:49:36	15:27:56	14:56:49	02:57:22	03:03:29	01:07:14
	0.009	-0.01	-0.007	-0.005	0.009	-0.006	0.007	-0.007	0.009	-0.052
	0.675	0.888	0.807	0.544	0.626	0.442	0.612	0.75	0.618	0.98
	02:50:09	02:50:09	14:55:09	17:05:09	02:55:09	15:50:09	02:45:09	03:20:09	03:00:09	01:20:09
	02:42:45	02:21:16	13:10:36	15:53:43	02:34:55	13:44:40	02:46:49	03:06:49	03:29:38	01:00:55
B	0.1	9.28	6.92	10.48	8.9	6.62	10.3	10.5	9.04	0.08
	1	1	1	1	1	1	1	1	1	1
	02:57:39	07:12:39	07:52:39	07:27:39	07:12:39	07:27:39	06:47:39	06:52:39	07:12:39	14:32:39
	02:45:09	06:14:58	06:40:51	06:30:52	06:10:36	06:03:50	05:55:40	06:06:54	06:14:44	15:02:39
	0.029	6.409	5.189	6.756	6.559	4.764	7.073	7.602	5.522	0.016
	0.788	0.993	0.996	0.983	0.983	0.985	0.979	0.987	0.968	0.73
	02:57:39	07:02:39	07:47:39	07:17:39	07:12:39	07:27:39	06:42:39	06:52:39	07:12:39	03:02:39
	02:44:49	05:49:45	06:17:07	06:00:53	05:49:40	05:33:26	05:35:15	05:49:52	05:38:56	03:17:14
	0.06	7.27	5.86	8.08	8.27	6.34	9.57	9.95	7.6	0.04
	0.871	0.975	0.989	0.971	0.998	0.999	0.998	0.999	0.988	0.923
	02:55:09	07:10:09	07:50:09	07:25:09	07:10:09	07:30:09	06:45:09	06:55:09	07:15:09	02:55:09
	02:49:36	05:59:28	06:27:46	06:14:39	06:06:27	06:02:23	05:53:13	06:05:11	06:04:46	03:03:29
	0.016	6.105	4.88	5.487	5.608	4.333	6.168	6.563	4.909	0.009
	0.672	0.996	0.996	0.971	0.981	0.99	0.982	0.982	0.981	0.601
	02:50:09	07:00:09	07:50:09	07:10:09	07:05:09	07:25:09	06:35:09	06:45:09	07:05:09	03:00:09
	02:33:09	05:46:09	06:11:18	05:42:28	05:35:07	05:22:09	05:24:58	05:39:33	05:26:52	03:27:19
C	0.06	4.6	4.68	2.64	6.06	4.86	4.72	3.6	9.18	-0.06
	1	1	1	1	1	1	1	1	1	1
	00:22:39	08:57:39	08:22:39	06:07:39	08:17:39	07:52:39	09:42:39	07:52:39	07:42:39	19:12:39
	00:20:09	07:00:09	06:33:26	05:17:34	06:56:49	06:16:53	08:12:58	06:03:44	06:35:33	19:08:29
	-0.019	3.574	4.011	1.627	3.84	4.223	2.286	3.125	5.647	0.01
	0.917	0.99	0.996	0.994	0.989	0.997	0.948	0.995	0.965	0.868
	02:52:39	08:52:39	08:17:39	10:42:39	08:07:39	07:47:39	09:37:39	07:52:39	07:32:39	07:52:39
	02:37:13	06:30:23	06:17:19	06:57:36	06:14:46	06:04:53	06:43:51	05:52:10	05:55:24	07:46:10
	-0.03	4.36	4.32	1.87	4.66	4.81	3.64	3.57	8.42	0.03
	0.964	0.999	0.998	0.947	0.971	1	0.971	1	0.997	0.964
	03:00:09	08:55:09	08:20:09	06:05:09	08:15:09	07:50:09	09:40:09	07:55:09	07:40:09	19:05:09
	02:45:42	06:56:55	06:25:49	05:00:12	06:36:07	06:17:45	07:49:31	06:07:15	06:30:21	19:07:22
	-0.009	3.468	3.774	1.489	3.669	3.877	2.094	2.947	5.106	-0.006
	0.626	0.997	0.997	0.994	0.995	0.995	0.976	0.997	0.981	0.602
	02:50:09	08:45:09	08:15:09	10:35:09	08:15:09	07:45:09	09:55:09	08:00:09	07:25:09	22:10:09
	02:19:12	06:25:58	06:09:34	06:36:34	06:09:37	05:55:43	06:28:25	05:45:06	05:44:48	21:23:05
D	-0.06	4.44	7.18	2.24	4.36	4.8	3.7	4.4	10.46	0.08
	1	1	1	1	1	1	1	1	1	1
	18:22:39	08:47:39	08:22:39	12:47:39	09:42:39	07:52:39	10:32:39	08:22:39	07:32:39	02:57:39
	18:03:29	07:08:07	07:09:27	08:37:12	07:30:06	06:18:53	08:43:19	06:54:06	06:32:43	03:00:09
	-0.01	3.501	3.759	1.569	3.234	3.951	2.481	3.314	6.478	0.016
	0.868	0.993	0.973	0.995	0.995	0.997	0.98	0.996	0.997	0.56
	21:57:39	08:57:39	08:12:39	12:02:39	08:52:39	07:42:39	10:37:39	08:32:39	06:47:39	02:52:39
	20:23:40	06:45:19	06:07:09	06:48:45	06:42:34	06:01:34	07:53:28	06:28:22	05:46:02	03:05:09
	-0.03	4.05	4.65	1.87	3.78	4.43	3.23	3.62	8.04	0.05
	0.964	1	0.91	0.999	0.999	0.998	0.993	0.985	0.971	0.893
	04:10:09	09:05:09	08:20:09	10:40:09	10:05:09	07:50:09	10:35:09	08:25:09	07:35:09	02:55:09
	03:57:56	07:04:24	06:32:42	07:15:46	07:23:48	06:13:22	08:31:01	06:38:10	06:16:17	02:59:09
	-0.009	3.263	3.5	1.479	3.059	3.637	2.27	3.212	5.674	0.011
	0.922	0.994	0.988	0.996	0.996	0.996	0.989	0.998	0.989	0.642
	02:55:09	08:55:09	08:05:09	11:45:09	09:00:09	07:45:09	10:45:09	08:30:09	06:45:09	03:00:09
	02:37:12	06:35:54	05:57:39	06:29:36	06:35:23	05:52:49	07:38:29	06:24:24	05:37:10	03:11:55
E	0.06	13.18	8.84	5.62	13.22	12.3	8.2	13.14	16.02	0.06
	1	1	1	1	1	1	1	1	1	1
	15:57:39	07:17:39	07:02:39	08:22:39	07:27:39	07:27:39	07:37:39	06:37:39	06:47:39	18:12:39
	16:03:29	06:39:32	06:04:35	06:50:37	06:41:22	06:41:58	06:33:24	05:59:44	06:15:38	18:21:49
	-0.015	7.353	7.033	3.921	7.329	7.274	5.015	8.195	8.277	0.012
	0.961	0.946	0.993	0.989	0.965	0.972	0.969	0.967	0.934	0.713
	02:57:39	07:12:39	06:57:39	08:22:39	07:22:39	07:17:39	07:27:39	06:37:39	06:42:39	13:17:39
	02:52:15	06:13:38	05:52:47	06:12:31	06:06:44	06:10:11	05:55:22	05:37:35	05:48:41	13:07:56
	-0.03	11.04	8.32	4.99	10.75	10.47	7.04	11.89	13.49	0.03
	0.964	0.988	0.999	0.995	0.983	0.99	0.991	0.996	0.988	0.965
	20:25:09	07:15:09	07:00:09	08:25:09	07:25:09	07:25:09	07:35:09	06:40:09	06:45:09	21:20:09
	19:52:56	06:33:33	06:03:02	06:40:53	06:31:29	06:33:19	06:24:11	05:56:39	06:10:09	21:09:02
	-0.01	5.748	6.073	3.543	6.204	6.499	4.437	7.447	7.031	0.008
	0.964	0.94	0.985	0.991	0.963	0.983	0.981	0.981	0.96	0.7
	16:20:09	07:05:09	06:55:09	08:15:09	07:10:09	07:20:09	07:20:09	06:35:09	06:45:09	21:15:09
	15:07:56	05:56:26	05:42:33	05:58:23	05:52:14	06:02:28	05:42:56	05:31:00	05:39:17	20:37:49
F	-0.06	2.72	3.82	4.82	2.8	7.74	9.38	4.14	4.14	-0.06
	1	1	1	1	1	1	1	1	1	1
	18:07:39	12:12:39	07:52:39	08:52:39	10:37:39	08:22:39	08:17:39	13:47:39	08:02:39	19:12:39
	18:11:49	09:03:03	06:16:57	06:59:49	08:21:22	07:02:07	07:16:56	11:34:20	06:13:55	19:21:49
	0.02	1.71	3.039	3.319	2.061	4.991	4.799	1.819	3.335	0.012
	0.745	0.991	0.998	0.994	0.992	0.982	0.96	0.96	0.995	0.663
	02:52:39	11:32:39	08:32:39	08:47:39	11:22:39	07:32:39	08:12:39	11:42:39	08:12:39	23:12:39
	02:50:09	07:12:34	06:04:45	06:11:57	07:38:25	06:09:47	06:20:42	08:09:59	05:50:33	23:00:09
	0.05	2.01	3.45	3.69	2.62	6.29	6.87	2.86	3.6	-0.03
	0.987	0.96	0.996	0.97	0.998	1	0.957	1	0.993	0.75
	02:55:09	12:10:09	07:55:09	08:55:09	10:40:09	07:25:09	08:15:09	06:25:09	08:05:09	22:55:09
	02:53:49	08:03:33	06:11:53	06:28:27	08:15:30	06:24:55	06:55:13	05:42:37	06:00:26	22:58:29
	0.011	1.614	2.87	3.016	2.018	4.694	4.154	1.593	3.106	0.007
	0.642	0.993	0.998	0.994	0.996	0.991	0.973	0.973	0.994	0.612
	02:55:09	11:15:09	08:30:09	08:40:09	11:15:09	07:35:09	08:05:09	11:50:09	08:05:09	02:55:09
	02:49:16	06:57:07	05:55:54	05:56:01	07:33:30	06:04:23	06:02:55	07:40:05	05:39:56	02:26:35
G	-0.22	3.9	4.32	6.28	4.1	7.74	9.5	2.7	9.26	0.06
	1	1	1	1	1	1	1	1	1	1
	02:57:39	09:22:39	05:07:39	09:12:39	10:22:39	07:17:39	07:12:39	11:27:39	08:17:39	14:32:39
	02:55:09	07:53:29	04:36:16	07:47:02	08:48:27	06:30:11	06:29:26	09:11:58	07:17:13	14:43:29
	-0.075	2.053	3.098	3.255	1.957	5.339	5.766	1.649	4.729	-0.01
	0.855	0.96	0.992	0.967	0.954	0.986	0.987	0.993	0.988	0.604
	02:57:39	09:17:39	07:42:39	09:07:39	10:22:39	07:22:39	07:17:39	11:52:39	07:47:39	22:17:39
	02:45:51	06:36:44	05:44:20	06:28:45	07:11:46	06:10:38	06:02:48	07:59:44	06:15:38	20:53:35
	-0.14	3.15	3.46	3.93	2.93	6.62	6.77	1.91	6.34	0.02
	0.902	0.981	0.994	0.894	0.95	0.991	0.949	0.977	0.934	1
	03:00:09	09:25:09	07:50:09	09:15:09	10:20:09	07:20:09	07:15:09	11:55:09	08:15:09	13:00:09
	02:52:03	07:35:43	05:57:35	06:57:33	08:14:00	06:23:57	06:13:36	08:31:54	06:50:16	13:20:09
	-0.052	1.945	3.03	3.036	1.947	4.757	5.104	1.61	4.307	-0.008
	0.837	0.984	0.997	0.984	0.984	0.988	0.984	0.997	0.988	0.735
	03:00:09	09:25:09	07:50:09	09:00:09	10:30:09	07:25:09	07:10:09	12:00:09	07:40:09	22:10:09
	02:41:39	06:28:01	05:41:47	06:16:58	07:10:56	06:02:10	05:52:50	07:54:15	06:06:16	20:30:09
H	0.08	0.06	0.08	-0.06	0.06	-0.08	-0.06	0.06	0.08	-0.06
	1	1	1	1	1	1	1	1	1	1
	02:57:39	20:57:39	02:57:39	22:27:39	05:52:39	21:27:39	21:02:39	02:57:39	02:57:39	04:07:39
	02:57:39	21:26:49	03:07:39	22:21:49	06:08:29	21:21:24	21:00:09	02:55:09	03:13:54	04:13:29
	0.014	-0.025	0.017	0.011	-0.015	-0.014	-0.01	0.014	-0.018	0.022
	0.475	0.943	0.665	0.476	0.966	0.824	0.631	0.602	0.926	0.814
	03:02:39	02:57:39	02:52:39	02:52:39	22:47:39	12:02:39	11:32:39	02:57:39	02:27:39	02:57:39
	02:57:47	02:39:05	03:17:56	02:41:54	20:06:07	11:54:29	11:26:10	02:49:29	01:49:04	02:49:58
	0.05	-0.04	0.04	-0.03	0.03	0.03	0.03	0.04	-0.03	0.04
	0.893	1	0.75	0.75	0.965	0.965	0.964	0.923	0.75	0.923
	02:55:09	02:55:09	02:55:09	11:40:09	21:20:09	21:20:09	19:05:09	02:55:09	17:55:09	03:00:09
	02:55:09	02:45:09	03:04:19	11:36:49	22:32:20	21:35:42	19:07:22	02:53:29	16:01:49	02:54:19
	0.01	-0.017	0.009	0.007	-0.007	-0.012	0.006	0.01	-0.011	0.011
	0.579	0.868	0.525	0.492	0.672	0.851	0.471	0.675	0.692	0.577
	03:00:09	02:50:09	03:00:09	02:45:09	18:05:09	12:10:09	12:00:09	02:50:09	03:20:09	02:50:09
	02:55:33	02:28:09	03:41:49	02:33:29	13:55:09	11:53:00	12:09:57	02:44:36	02:03:23	02:38:42
[truncated: 24 more columns]

## Sheet: med_con
	LB+Gm	LB+Gm	LB+Gm	LB+Gm	LB+Gm	LB+Gm	LB+Gm	LB+Gm
Time	A3	A4	A5	A6	H6	H7	H8	H9			Time	Mean_LB+Gm	SE_LB+Gm
0	0.091	0.093	0.09	0.089	0.095	0.09	0.088	0.089			0	0.090625	0.000822398
5	0.091	0.093	0.09	0.089	0.095	0.09	0.088	0.089			5	0.090625	0.000822398
10	0.091	0.092	0.09	0.089	0.095	0.09	0.088	0.089			10	0.0905	0.000779194
15	0.091	0.093	0.09	0.089	0.095	0.09	0.088	0.089			15	0.090625	0.000822398
20	0.09	0.092	0.09	0.089	0.095	0.09	0.088	0.089			20	0.090375	0.00077776
25	0.09	0.092	0.09	0.089	0.095	0.09	0.088	0.089			25	0.090375	0.00077776
30	0.09	0.092	0.09	0.089	0.095	0.09	0.088	0.089			30	0.090375	0.00077776
35	0.09	0.092	0.09	0.089	0.095	0.09	0.088	0.089			35	0.090375	0.00077776
40	0.09	0.092	0.09	0.089	0.095	0.09	0.088	0.089			40	0.090375	0.00077776
45	0.09	0.092	0.09	0.089	0.095	0.09	0.088	0.089			45	0.090375	0.00077776
50	0.09	0.092	0.09	0.089	0.095	0.09	0.088	0.089			50	0.090375	0.00077776
55	0.09	0.092	0.09	0.089	0.095	0.09	0.088	0.089			55	0.090375	0.00077776
60	0.09	0.092	0.09	0.089	0.095	0.09	0.088	0.089			60	0.090375	0.00077776
65	0.09	0.092	0.09	0.088	0.095	0.089	0.088	0.089			65	0.090125	0.000833185
70	0.09	0.092	0.09	0.089	0.095	0.09	0.088	0.089			70	0.090375	0.00077776
75	0.09	0.092	0.09	0.089	0.094	0.09	0.088	0.089			75	0.09025	0.000674802
80	0.09	0.092	0.09	0.089	0.094	0.089	0.088	0.089			80	0.090125	0.000692756
85	0.09	0.092	0.09	0.089	0.095	0.09	0.088	0.089			85	0.090375	0.00077776
90	0.09	0.092	0.09	0.089	0.094	0.09	0.088	0.089			90	0.09025	0.000674802
95	0.09	0.092	0.09	0.089	0.094	0.09	0.088	0.089			95	0.09025	0.000674802
100	0.09	0.092	0.09	0.089	0.094	0.09	0.088	0.089			100	0.09025	0.000674802
105	0.09	0.092	0.09	0.089	0.094	0.09	0.088	0.089			105	0.09025	0.000674802
110	0.09	0.092	0.09	0.089	0.094	0.09	0.088	0.089			110	0.09025	0.000674802
115	0.09	0.092	0.09	0.089	0.094	0.09	0.088	0.089			115	0.09025	0.000674802
120	0.09	0.092	0.09	0.089	0.094	0.09	0.088	0.089			120	0.09025	0.000674802
125	0.09	0.092	0.09	0.089	0.094	0.09	0.088	0.089			125	0.09025	0.000674802
130	0.09	0.092	0.09	0.089	0.094	0.09	0.088	0.089			130	0.09025	0.000674802
135	0.09	0.092	0.09	0.089	0.094	0.09	0.088	0.089			135	0.09025	0.000674802
140	0.09	0.092	0.09	0.089	0.094	0.09	0.088	0.089			140	0.09025	0.000674802
145	0.09	0.092	0.09	0.088	0.094	0.09	0.088	0.089			145	0.090125	0.00071807
150	0.09	0.092	0.09	0.089	0.094	0.09	0.088	0.089			150	0.09025	0.000674802
155	0.09	0.092	0.09	0.089	0.094	0.09	0.088	0.089			155	0.09025	0.000674802
160	0.09	0.092	0.09	0.089	0.094	0.089	0.088	0.089			160	0.090125	0.000692756
165	0.09	0.092	0.09	0.089	0.094	0.089	0.088	0.089			165	0.090125	0.000692756
170	0.09	0.092	0.09	0.089	0.094	0.089	0.088	0.089			170	0.090125	0.000692756
175	0.09	0.092	0.09	0.089	0.094	0.089	0.088	0.089			175	0.090125	0.000692756
180	0.09	0.092	0.09	0.089	0.094	0.089	0.088	0.089			180	0.090125	0.000692756
185	0.09	0.092	0.09	0.089	0.094	0.089	0.088	0.089			185	0.090125	0.000692756
190	0.09	0.092	0.09	0.089	0.094	0.089	0.088	0.089			190	0.090125	0.000692756
195	0.09	0.092	0.09	0.089	0.094	0.089	0.088	0.089			195	0.090125	0.000692756
200	0.09	0.092	0.09	0.089	0.094	0.089	0.088	0.089			200	0.090125	0.000692756
205	0.09	0.092	0.09	0.089	0.094	0.09	0.088	0.089			205	0.09025	0.000674802
210	0.09	0.092	0.09	0.089	0.094	0.089	0.088	0.089			210	0.090125	0.000692756
215	0.09	0.092	0.09	0.089	0.094	0.09	0.088	0.089			215	0.09025	0.000674802
220	0.09	0.092	0.09	0.089	0.094	0.09	0.088	0.089			220	0.09025	0.000674802
225	0.09	0.092	0.09	0.089	0.094	0.089	0.088	0.089			225	0.090125	0.000692756
230	0.09	0.092	0.09	0.089	0.094	0.09	0.088	0.089			230	0.09025	0.000674802
235	0.09	0.092	0.09	0.089	0.094	0.089	0.088	0.089			235	0.090125	0.000692756
240	0.09	0.092	0.09	0.089	0.094	0.089	0.088	0.089			240	0.090125	0.000692756
245	0.09	0.092	0.09	0.089	0.094	0.089	0.088	0.089			245	0.090125	0.000692756
250	0.09	0.092	0.09	0.089	0.094	0.089	0.088	0.089			250	0.090125	0.000692756
255	0.09	0.092	0.09	0.089	0.094	0.089	0.088	0.089			255	0.090125	0.000692756
260	0.09	0.092	0.09	0.089	0.094	0.089	0.088	0.089			260	0.090125	0.000692756
265	0.09	0.092	0.09	0.089	0.094	0.089	0.088	0.089			265	0.090125	0.000692756
270	0.09	0.092	0.09	0.089	0.094	0.089	0.088	0.089			270	0.090125	0.000692756
275	0.09	0.092	0.09	0.089	0.094	0.089	0.088	0.089			275	0.090125	0.000692756
280	0.09	0.092	0.09	0.089	0.094	0.089	0.088	0.089			280	0.090125	0.000692756
285	0.09	0.092	0.09	0.089	0.094	0.089	0.088	0.089			285	0.090125	0.000692756
290	0.09	0.092	0.09	0.089	0.094	0.089	0.088	0.089			290	0.090125	0.000692756
295	0.09	0.092	0.09	0.089	0.094	0.089	0.088	0.089			295	0.090125	0.000692756
300	0.09	0.092	0.09	0.089	0.094	0.089	0.088	0.089			300	0.090125	0.000692756
305	0.09	0.092	0.09	0.089	0.094	0.089	0.088	0.089			305	0.090125	0.000692756
310	0.09	0.092	0.09	0.089	0.094	0.089	0.088	0.089			310	0.090125	0.000692756
315	0.09	0.092	0.09	0.089	0.094	0.089	0.088	0.089			315	0.090125	0.000692756
320	0.09	0.092	0.09	0.089	0.094	0.089	0.088	0.089			320	0.090125	0.000692756
325	0.09	0.092	0.09	0.089	0.094	0.089	0.088	0.089			325	0.090125	0.000692756
330	0.09	0.092	0.09	0.089	0.094	0.089	0.088	0.089			330	0.090125	0.000692756
335	0.09	0.092	0.09	0.089	0.094	0.09	0.088	0.089			335	0.09025	0.000674802
340	0.09	0.092	0.09	0.089	0.094	0.09	0.088	0.089			340	0.09025	0.000674802
345	0.09	0.092	0.09	0.089	0.094	0.089	0.088	0.089			345	0.090125	0.000692756
350	0.09	0.092	0.09	0.089	0.094	0.089	0.088	0.089			350	0.090125	0.000692756
355	0.09	0.092	0.09	0.089	0.094	0.089	0.088	0.089			355	0.090125	0.000692756
360	0.09	0.092	0.09	0.089	0.094	0.089	0.088	0.089			360	0.090125	0.000692756
365	0.09	0.092	0.09	0.089	0.094	0.089	0.088	0.089			365	0.090125	0.000692756
370	0.09	0.092	0.09	0.089	0.094	0.089	0.088	0.089			370	0.090125	0.000692756
375	0.09	0.092	0.09	0.089	0.094	0.089	0.088	0.089			375	0.090125	0.000692756
380	0.09	0.092	0.09	0.089	0.094	0.089	0.088	0.089			380	0.090125	0.000692756
385	0.09	0.092	0.09	0.089	0.094	0.089	0.088	0.089			385	0.090125	0.000692756
390	0.09	0.092	0.09	0.089	0.094	0.089	0.088	0.089			390	0.090125	0.000692756
395	0.09	0.092	0.09	0.089	0.094	0.089	0.088	0.089			395	0.090125	0.000692756
400	0.09	0.092	0.09	0.089	0.094	0.089	0.088	0.089			400	0.090125	0.000692756
405	0.09	0.092	0.09	0.089	0.094	0.089	0.088	0.089			405	0.090125	0.000692756
410	0.09	0.092	0.09	0.089	0.094	0.089	0.088	0.089			410	0.090125	0.000692756
415	0.09	0.092	0.09	0.089	0.094	0.089	0.088	0.089			415	0.090125	0.000692756
420	0.09	0.092	0.09	0.089	0.094	0.089	0.088	0.089			420	0.090125	0.000692756
425	0.09	0.092	0.09	0.089	0.094	0.089	0.088	0.089			425	0.090125	0.000692756
430	0.09	0.092	0.09	0.089	0.094	0.089	0.088	0.089			430	0.090125	0.000692756
435	0.09	0.092	0.09	0.089	0.094	0.089	0.088	0.089			435	0.090125	0.000692756
440	0.09	0.092	0.09	0.089	0.094	0.089	0.088	0.089			440	0.090125	0.000692756
445	0.09	0.092	0.09	0.089	0.094	0.089	0.088	0.089			445	0.090125	0.000692756
450	0.09	0.092	0.09	0.089	0.094	0.089	0.088	0.089			450	0.090125	0.000692756
455	0.09	0.092	0.09	0.089	0.094	0.089	0.088	0.089			455	0.090125	0.000692756
460	0.089	0.092	0.09	0.089	0.094	0.089	0.088	0.089			460	0.09	0.000707107
465	0.09	0.092	0.09	0.089	0.094	0.089	0.088	0.089			465	0.090125	0.000692756
470	0.09	0.092	0.09	0.089	0.094	0.089	0.088	0.089			470	0.090125	0.000692756
475	0.09	0.092	0.09	0.089	0.094	0.089	0.088	0.089			475	0.090125	0.000692756
480	0.09	0.092	0.09	0.089	0.094	0.089	0.088	0.089			480	0.090125	0.000692756
485	0.09	0.092	0.09	0.089	0.094	0.089	0.088	0.089			485	0.090125	0.000692756
490	0.09	0.092	0.089	0.089	0.094	0.089	0.088	0.089			490	0.09	0.000707107
495	0.09	0.092	0.09	0.089	0.094	0.089	0.088	0.089			495	0.090125	0.000692756
500	0.09	0.092	0.09	0.089	0.094	0.089	0.088	0.089			500	0.090125	0.000692756
505	0.09	0.092	0.09	0.089	0.094	0.089	0.088	0.089			505	0.090125	0.000692756
510	0.089	0.092	0.089	0.089	0.094	0.089	0.088	0.089			510	0.089875	0.00071807
515	0.089	0.092	0.09	0.089	0.094	0.089	0.088	0.089			515	0.09	0.000707107
520	0.089	0.092	0.09	0.089	0.094	0.089	0.088	0.089			520	0.09	0.000707107
525	0.089	0.092	0.09	0.089	0.094	0.089	0.088	0.089			525	0.09	0.000707107
530	0.089	0.092	0.09	0.089	0.094	0.089	0.088	0.089			530	0.09	0.000707107
535	0.089	0.092	0.09	0.089	0.094	0.089	0.088	0.089			535	0.09	0.000707107
540	0.089	0.092	0.09	0.089	0.094	0.089	0.088	0.089			540	0.09	0.000707107
545	0.09	0.092	0.09	0.089	0.094	0.089	0.088	0.089			545	0.090125	0.000692756
550	0.09	0.092	0.09	0.089	0.094	0.089	0.088	0.089			550	0.090125	0.000692756
555	0.089	0.092	0.09	0.089	0.094	0.089	0.088	0.089			555	0.09	0.000707107
560	0.089	0.092	0.09	0.089	0.094	0.089	0.088	0.089			560	0.09	0.000707107
565	0.09	0.092	0.089	0.089	0.094	0.089	0.088	0.089			565	0.09	0.000707107
570	0.089	0.092	0.09	0.089	0.094	0.089	0.088	0.089			570	0.09	0.000707107
575	0.09	0.092	0.09	0.089	0.094	0.089	0.088	0.089			575	0.090125	0.000692756
580	0.09	0.092	0.09	0.089	0.094	0.089	0.088	0.089			580	0.090125	0.000692756
585	0.09	0.092	0.09	0.089	0.094	0.09	0.088	0.089			585	0.09025	0.000674802
590	0.089	0.092	0.09	0.089	0.093	0.09	0.088	0.089			590	0.09	0.000597614
595	0.089	0.092	0.09	0.089	0.094	0.09	0.088	0.089			595	0.090125	0.000692756
600	0.09	0.092	0.09	0.089	0.094	0.09	0.088	0.089			600	0.09025	0.000674802
605	0.09	0.092	0.089	0.089	0.094	0.09	0.088	0.089			605	0.090125	0.000692756
610	0.09	0.092	0.09	0.089	0.094	0.09	0.088	0.089			610	0.09025	0.000674802
615	0.09	0.092	0.09	0.089	0.094	0.089	0.088	0.089			615	0.090125	0.000692756
620	0.09	0.092	0.09	0.089	0.094	0.09	0.088	0.089			620	0.09025	0.000674802
625	0.09	0.092	0.09	0.089	0.094	0.089	0.088	0.089			625	0.090125	0.000692756
630	0.09	0.092	0.09	0.089	0.094	0.09	0.088	0.089			630	0.09025	0.000674802
635	0.09	0.092	0.089	0.089	0.094	0.09	0.088	0.089			635	0.090125	0.000692756
640	0.09	0.092	0.09	0.089	0.093	0.09	0.088	0.089			640	0.090125	0.000580563
645	0.09	0.092	0.09	0.089	0.094	0.09	0.088	0.089			645	0.09025	0.000674802
650	0.089	0.092	0.089	0.089	0.093	0.089	0.088	0.089			650	0.08975	0.00061962
655	0.09	0.092	0.09	0.089	0.093	0.09	0.088	0.089			655	0.090125	0.000580563
660	0.09	0.092	0.09	0.089	0.094	0.089	0.088	0.089			660	0.090125	0.000692756
665	0.089	0.092	0.089	0.089	0.093	0.09	0.088	0.089			665	0.089875	0.000610547
670	0.09	0.092	0.09	0.089	0.094	0.09	0.088	0.089			670	0.09025	0.000674802
675	0.089	0.092	0.09	0.089	0.093	0.09	0.088	0.089			675	0.09	0.000597614
680	0.09	0.092	0.09	0.089	0.093	0.089	0.088	0.089			680	0.09	0.000597614
685	0.09	0.092	0.09	0.089	0.094	0.09	0.088	0.089			685	0.09025	0.000674802
690	0.09	0.092	0.09	0.089	0.093	0.09	0.088	0.089			690	0.090125	0.000580563
695	0.09	0.092	0.09	0.089	0.093	0.09	0.088	0.089			695	0.090125	0.000580563
700	0.09	0.092	0.089	0.089	0.093	0.089	0.088	0.089			700	0.089875	0.000610547
705	0.09	0.092	0.09	0.089	0.093	0.089	0.088	0.089			705	0.09	0.000597614
710	0.09	0.092	0.089	0.089	0.093	0.09	0.088	0.089			710	0.09	0.000597614
715	0.09	0.092	0.089	0.089	0.093	0.089	0.088	0.089			715	0.089875	0.000610547
720	0.09	0.092	0.09	0.089	0.093	0.09	0.088	0.089			720	0.090125	0.000580563
725	0.089	0.092	0.089	0.089	0.093	0.089	0.088	0.089			725	0.08975	0.00061962
730	0.09	0.092	0.09	0.089	0.094	0.089	0.088	0.089			730	0.090125	0.000692756
735	0.09	0.092	0.089	0.089	0.093	0.089	0.088	0.089			735	0.089875	0.000610547
740	0.09	0.092	0.09	0.089	0.093	0.089	0.088	0.089			740	0.09	0.000597614
745	0.09	0.092	0.09	0.089	0.093	0.089	0.088	0.089			745	0.09	0.000597614
750	0.089	0.092	0.09	0.089	0.093	0.089	0.088	0.089			750	0.089875	0.000610547
755	0.09	0.092	0.089	0.089	0.093	0.089	0.088	0.089			755	0.089875	0.000610547
760	0.09	0.092	0.089	0.089	0.093	0.089	0.088	0.089			760	0.089875	0.000610547
765	0.09	0.092	0.089	0.089	0.093	0.089	0.088	0.089			765	0.089875	0.000610547
770	0.09	0.092	0.09	0.089	0.093	0.089	0.088	0.089			770	0.09	0.000597614
775	0.09	0.092	0.089	0.089	0.093	0.089	0.088	0.089			775	0.089875	0.000610547
780	0.09	0.092	0.089	0.089	0.093	0.089	0.088	0.089			780	0.089875	0.000610547
785	0.09	0.092	0.089	0.089	0.093	0.089	0.088	0.089			785	0.089875	0.000610547
790	0.09	0.092	0.089	0.089	0.093	0.089	0.088	0.089			790	0.089875	0.000610547
795	0.09	0.092	0.089	0.089	0.093	0.089	0.088	0.089			795	0.089875	0.000610547
800	0.09	0.092	0.09	0.089	0.093	0.089	0.088	0.089			800	0.09	0.000597614
805	0.089	0.091	0.09	0.089	0.093	0.089	0.088	0.089			805	0.08975	0.000559017
810	0.09	0.092	0.09	0.089	0.093	0.089	0.088	0.089			810	0.09	0.000597614
815	0.09	0.091	0.089	0.089	0.093	0.089	0.088	0.089			815	0.08975	0.000559017
820	0.09	0.092	0.09	0.089	0.093	0.089	0.088	0.089			820	0.09	0.000597614
825	0.089	0.092	0.089	0.089	0.093	0.089	0.088	0.089			825	0.08975	0.00061962
830	0.089	0.091	0.089	0.089	0.093	0.089	0.088	0.089			830	0.089625	0.000564975
835	0.09	0.091	0.089	0.089	0.093	0.089	0.088	0.089			835	0.08975	0.000559017
840	0.09	0.092	0.089	0.089	0.093	0.089	0.088	0.089			840	0.089875	0.000610547
845	0.09	0.092	0.09	0.089	0.093	0.089	0.088	0.089			845	0.09	0.000597614
850	0.089	0.091	0.089	0.089	0.093	0.089	0.088	0.089			850	0.089625	0.000564975
855	0.09	0.092	0.09	0.089	0.093	0.089	0.088	0.089			855	0.09	0.000597614
860	0.089	0.092	0.089	0.089	0.093	0.089	0.088	0.089			860	0.08975	0.00061962
865	0.09	0.092	0.089	0.089	0.093	0.089	0.088	0.089			865	0.089875	0.000610547
870	0.089	0.091	0.089	0.089	0.093	0.089	0.088	0.089			870	0.089625	0.000564975
875	0.09	0.092	0.09	0.089	0.093	0.089	0.088	0.089			875	0.09	0.000597614
880	0.09	0.092	0.089	0.089	0.093	0.089	0.088	0.089			880	0.089875	0.000610547
885	0.09	0.092	0.09	0.089	0.093	0.089	0.088	0.089			885	0.09	0.000597614
890	0.09	0.092	0.089	0.089	0.093	0.089	0.088	0.089			890	0.089875	0.000610547
895	0.089	0.092	0.089	0.089	0.093	0.089	0.088	0.089			895	0.08975	0.00061962
900	0.089	0.092	0.089	0.089	0.093	0.089	0.088	0.089			900	0.08975	0.00061962
905	0.09	0.092	0.09	0.089	0.093	0.089	0.088	0.089			905	0.09	0.000597614
910	0.09	0.092	0.089	0.089	0.093	0.089	0.088	0.089			910	0.089875	0.000610547
915	0.089	0.091	0.089	0.089	0.093	0.089	0.088	0.089			915	0.089625	0.000564975
920	0.089	0.091	0.089	0.089	0.093	0.089	0.088	0.089			920	0.089625	0.000564975
925	0.09	0.092	0.089	0.089	0.093	0.089	0.088	0.089			925	0.089875	0.000610547
930	0.09	0.092	0.089	0.089	0.093	0.089	0.088	0.089			930	0.089875	0.000610547
935	0.09	0.092	0.09	0.089	0.093	0.089	0.088	0.089			935	0.09	0.000597614
940	0.09	0.091	0.089	0.089	0.093	0.089	0.088	0.089			940	0.08975	0.000559017
945	0.09	0.092	0.09	0.089	0.093	0.089	0.088	0.089			945	0.09	0.000597614
950	0.09	0.091	0.089	0.089	0.093	0.089	0.088	0.089			950	0.08975	0.000559017
955	0.089	0.091	0.089	0.089	0.093	0.089	0.088	0.089			955	0.089625	0.000564975
960	0.089	0.091	0.089	0.089	0.093	0.089	0.088	0.089			960	0.089625	0.000564975
965	0.09	0.091	0.089	0.089	0.093	0.089	0.088	0.089			965	0.08975	0.000559017
970	0.089	0.091	0.089	0.089	0.093	0.089	0.088	0.089			970	0.089625	0.000564975
975	0.09	0.092	0.089	0.089	0.093	0.089	0.088	0.089			975	0.089875	0.000610547
980	0.09	0.092	0.089	0.089	0.093	0.089	0.088	0.089			980	0.089875	0.000610547
985	0.09	0.091	0.089	0.089	0.093	0.089	0.088	0.089			985	0.08975	0.000559017
990	0.09	0.091	0.089	0.089	0.093	0.089	0.088	0.089			990	0.08975	0.000559017
995	0.09	0.091	0.089	0.089	0.093	0.089	0.088	0.089			995	0.08975	0.000559017
1000	0.09	0.091	0.089	0.089	0.093	0.089	0.088	0.089			1000	0.08975	0.000559017
1005	0.09	0.092	0.09	0.089	0.093	0.089	0.088	0.089			1005	0.09	0.000597614
1010	0.09	0.092	0.09	0.089	0.093	0.089	0.088	0.089			1010	0.09	0.000597614
1015	0.09	0.091	0.089	0.089	0.093	0.089	0.088	0.089			1015	0.08975	0.000559017
1020	0.09	0.091	0.089	0.089	0.093	0.089	0.088	0.089			1020	0.08975	0.000559017
1025	0.09	0.092	0.089	0.089	0.093	0.089	0.088	0.089			1025	0.089875	0.000610547
1030	0.09	0.092	0.089	0.089	0.093	0.089	0.088	0.089			1030	0.089875	0.000610547
1035	0.089	0.091	0.089	0.089	0.093	0.089	0.088	0.089			1035	0.089625	0.000564975
1040	0.09	0.091	0.089	0.089	0.093	0.089	0.088	0.089			1040	0.08975	0.000559017
1045	0.09	0.092	0.089	0.089	0.093	0.089	0.088	0.089			1045	0.089875	0.000610547
1050	0.09	0.092	0.089	0.089	0.093	0.089	0.088	0.089			1050	0.089875	0.000610547
1055	0.09	0.091	0.089	0.089	0.093	0.089	0.088	0.089			1055	0.08975	0.000559017
1060	0.09	0.091	0.089	0.089	0.093	0.089	0.088	0.089			1060	0.08975	0.000559017
1065	0.09	0.092	0.089	0.089	0.093	0.089	0.088	0.089			1065	0.089875	0.000610547
1070	0.09	0.092	0.089	0.089	0.093	0.089	0.088	0.089			1070	0.089875	0.000610547
1075	0.09	0.092	0.089	0.089	0.093	0.089	0.088	0.089			1075	0.089875	0.000610547
1080	0.09	0.091	0.089	0.089	0.093	0.089	0.088	0.089			1080	0.08975	0.000559017
1085	0.09	0.092	0.089	0.089	0.093	0.089	0.088	0.089			1085	0.089875	0.000610547
1090	0.089	0.091	0.089	0.089	0.093	0.089	0.088	0.089			1090	0.089625	0.000564975
1095	0.09	0.092	0.089	0.089	0.093	0.089	0.088	0.089			1095	0.089875	0.000610547
1100	0.09	0.092	0.089	0.089	0.093	0.089	0.088	0.089			1100	0.089875	0.000610547
1105	0.089	0.091	0.089	0.089	0.092	0.089	0.088	0.089			1105	0.0895	0.00046291
1110	0.09	0.091	0.089	0.089	0.093	0.089	0.088	0.089			1110	0.08975	0.000559017
1115	0.089	0.091	0.089	0.089	0.093	0.089	0.088	0.089			1115	0.089625	0.000564975
1120	0.089	0.091	0.089	0.089	0.093	0.089	0.088	0.089			1120	0.089625	0.000564975
1125	0.09	0.091	0.089	0.089	0.093	0.089	0.088	0.089			1125	0.08975	0.000559017
1130	0.09	0.091	0.089	0.089	0.092	0.089	0.088	0.089			1130	0.089625	0.000460493
1135	0.09	0.091	0.089	0.089	0.093	0.089	0.088	0.089			1135	0.08975	0.000559017
1140	0.09	0.091	0.089	0.089	0.092	0.089	0.088	0.089			1140	0.089625	0.000460493
1145	0.09	0.091	0.089	0.089	0.092	0.089	0.088	0.089			1145	0.089625	0.000460493
1150	0.09	0.092	0.089	0.089	0.093	0.089	0.088	0.089			1150	0.089875	0.000610547
1155	0.09	0.091	0.089	0.089	0.092	0.089	0.088	0.089			1155	0.089625	0.000460493
1160	0.09	0.091	0.089	0.089	0.093	0.089	0.088	0.089			1160	0.08975	0.000559017
1165	0.09	0.092	0.089	0.089	0.092	0.089	0.088	0.089			1165	0.08975	0.000526104
1170	0.09	0.091	0.089	0.089	0.093	0.089	0.088	0.089			1170	0.08975	0.000559017
1175	0.09	0.092	0.089	0.089	0.093	0.089	0.088	0.089			1175	0.089875	0.000610547
1180	0.09	0.092	0.089	0.089	0.093	0.089	0.088	0.089			1180	0.089875	0.000610547
1185	0.09	0.091	0.089	0.089	0.092	0.089	0.088	0.089			1185	0.089625	0.000460493
1190	0.09	0.091	0.089	0.089	0.092	0.089	0.088	0.089			1190	0.089625	0.000460493
1195	0.09	0.091	0.089	0.089	0.092	0.089	0.088	0.089			1195	0.089625	0.000460493
1200	0.09	0.091	0.089	0.089	0.092	0.089	0.088	0.089			1200	0.089625	0.000460493
1205	0.09	0.091	0.089	0.089	0.092	0.089	0.088	0.089			1205	0.089625	0.000460493
1210	0.09	0.091	0.089	0.089	0.092	0.089	0.088	0.089			1210	0.089625	0.000460493
1215	0.09	0.092	0.089	0.089	0.092	0.089	0.088	0.089			1215	0.08975	0.000526104
1220	0.09	0.091	0.089	0.089	0.092	0.089	0.088	0.089			1220	0.089625	0.000460493
1225	0.09	0.091	0.089	0.089	0.092	0.089	0.088	0.089			1225	0.089625	0.000460493
1230	0.089	0.091	0.089	0.089	0.092	0.089	0.088	0.089			1230	0.0895	0.00046291
1235	0.09	0.091	0.089	0.089	0.092	0.089	0.088	0.089			1235	0.089625	0.000460493
1240	0.09	0.091	0.089	0.089	0.092	0.089	0.088	0.089			1240	0.089625	0.000460493
1245	0.09	0.091	0.089	0.089	0.092	0.089	0.088	0.089			1245	0.089625	0.000460493
1250	0.09	0.091	0.089	0.089	0.092	0.089	0.088	0.089			1250	0.089625	0.000460493
1255	0.089	0.091	0.089	0.089	0.092	0.089	0.088	0.089			1255	0.0895	0.00046291
1260	0.09	0.091	0.089	0.089	0.092	0.089	0.088	0.089			1260	0.089625	0.000460493
1265	0.089	0.091	0.089	0.089	0.092	0.089	0.088	0.089			1265	0.0895	0.00046291
1270	0.09	0.091	0.089	0.089	0.092	0.089	0.088	0.089			1270	0.089625	0.000460493
1275	0.089	0.091	0.089	0.089	0.092	0.089	0.088	0.089			1275	0.0895	0.00046291
1280	0.09	0.091	0.089	0.089	0.092	0.089	0.088	0.089			1280	0.089625	0.000460493
1285	0.09	0.092	0.089	0.089	0.092	0.089	0.088	0.089			1285	0.08975	0.000526104
1290	0.09	0.091	0.089	0.089	0.092	0.089	0.088	0.089			1290	0.089625	0.000460493
1295	0.089	0.091	0.089	0.089	0.092	0.089	0.088	0.089			1295	0.0895	0.00046291
1300	0.089	0.091	0.089	0.089	0.092	0.089	0.088	0.089			1300	0.0895	0.00046291
1305	0.09	0.091	0.089	0.089	0.092	0.089	0.088	0.089			1305	0.089625	0.000460493
1310	0.09	0.091	0.089	0.089	0.092	0.089	0.088	0.089			1310	0.089625	0.000460493
1315	0.09	0.091	0.089	0.089	0.092	0.089	0.088	0.089			1315	0.089625	0.000460493
1320	0.09	0.091	0.089	0.089	0.092	0.089	0.088	0.089			1320	0.089625	0.000460493
1325	0.09	0.091	0.089	0.089	0.092	0.089	0.088	0.089			1325	0.089625	0.000460493
1330	0.09	0.091	0.089	0.089	0.092	0.089	0.088	0.089			1330	0.089625	0.000460493
1335	0.09	0.091	0.089	0.089	0.092	0.089	0.088	0.089			1335	0.089625	0.000460493
1340	0.089	0.091	0.089	0.089	0.092	0.089	0.088	0.089			1340	0.0895	0.00046291
1345	0.09	0.091	0.089	0.089	0.092	0.089	0.088	0.089			1345	0.089625	0.000460493
1350	0.089	0.091	0.089	0.089	0.092	0.089	0.088	0.089			1350	0.0895	0.00046291
1355	0.09	0.091	0.089	0.089	0.092	0.089	0.088	0.089			1355	0.089625	0.000460493
1360	0.09	0.091	0.089	0.089	0.092	0.089	0.088	0.089			1360	0.089625	0.000460493
1365	0.09	0.091	0.089	0.089	0.092	0.089	0.088	0.089			1365	0.089625	0.000460493
1370	0.09	0.091	0.089	0.089	0.092	0.089	0.088	0.089			1370	0.089625	0.000460493
1375	0.09	0.091	0.089	0.089	0.092	0.089	0.088	0.089			1375	0.089625	0.000460493
1380	0.089	0.091	0.089	0.088	0.092	0.089	0.088	0.089			1380	0.089375	0.000497763
1385	0.089	0.091	0.089	0.089	0.092	0.089	0.088	0.089			1385	0.0895	0.00046291
1390	0.09	0.091	0.089	0.089	0.092	0.089	0.088	0.089			1390	0.089625	0.000460493
1395	0.09	0.091	0.089	0.089	0.092	0.089	0.088	0.089			1395	0.089625	0.000460493
1400	0.09	0.091	0.089	0.089	0.092	0.089	0.088	0.089			1400	0.089625	0.000460493
1405	0.09	0.091	0.089	0.089	0.092	0.089	0.088	0.089			1405	0.089625	0.000460493
1410	0.09	0.091	0.089	0.089	0.092	0.089	0.088	0.089			1410	0.089625	0.000460493
1415	0.09	0.091	0.089	0.089	0.092	0.089	0.088	0.089			1415	0.089625	0.000460493
1420	0.09	0.091	0.089	0.089	0.092	0.089	0.088	0.089			1420	0.089625	0.000460493
1425	0.09	0.091	0.089	0.089	0.092	0.089	0.088	0.089			1425	0.089625	0.000460493
1430	0.09	0.091	0.089	0.089	0.092	0.089	0.088	0.089			1430	0.089625	0.000460493
1435	0.09	0.091	0.089	0.088	0.092	0.089	0.088	0.089			1435	0.0895	0.0005
1440	0.09	0.091	0.089	0.089	0.092	0.089	0.088	0.089			1440	0.089625	0.000460493

## Sheet: adjusted
SBW25+pSXn	SBW25+pSXn	SBW25+pSXn	SBW25+pSXn	SBW25+pSXn	SBW25+pSXn	SBW25+pSXn-serTGA	SBW25+pSXn-serTGA	SBW25+pSXn-serTGA	SBW25+pSXn-serTGA	SBW25+pSXn-serTGA	SBW25+pSXn-serTGA	SBW25+pSXn-serCGA	SBW25+pSXn-serCGA	SBW25+pSXn-serCGA	SBW25+pSXn-serCGA	SBW25+pSXn-serCGA	SBW25+pSXn-serCGA	delserCGA1+pSXn-serCGA	delserCGA1+pSXn-serCGA	delserCGA1+pSXn-serCGA	delserCGA1+pSXn-serCGA	delserCGA1+pSXn-serCGA	delserCGA1+pSXn-serCGA	delserCGA1+pSXn	delserCGA1+pSXn	delserCGA1+pSXn	delserCGA1+pSXn	delserCGA1+pSXn	delserCGA1+pSXn	delser1+pSXn-serTGA	delser1+pSXn-serTGA	delser1+pSXn-serTGA	delser1+pSXn-serTGA	delser1+pSXn-serTGA	delser1+pSXn-serTGA	delserCGA2+pSXn	delserCGA2+pSXn	delserCGA2+pSXn	delserCGA2+pSXn	delserCGA2+pSXn	delserCGA2+pSXn	delserCGA2+pSXn-serCGA	delserCGA2+pSXn-serCGA	delserCGA2+pSXn-serCGA	delserCGA2+pSXn-serCGA	delserCGA2+pSXn-serCGA	delserCGA2+pSXn-serCGA	delserCGA2+pSXn-serTGA	delserCGA2+pSXn-serTGA
B2	B5	B8	E3	E6	E9	B3	B6	B9	E4	E7	E10	B4	B7	B10	E2	E5	E8	C4	C7	C10	F2	F5	F8	C2	C5	C8	F3	F6	F9	C3	C6	C9	F4	F7	F10	D2	D5	D8	G3	G6	G9	D4	D7	D10	G2	G5	G8	D3	D6
0.108	0.103	0.1	0.1	0.1	0.104	0.107	0.106	0.107	0.102	0.115	0.11	0.112	0.101	0.113	0.104	0.102	0.099	0.107	0.106	0.106	0.099	0.098	0.108	0.113	0.104	0.107	0.094	0.106	0.109	0.107	0.1	0.098	0.094	0.105	0.103	0.106	0.099	0.102	0.11	0.102	0.102	0.097	0.098	0.102	0.096	0.103	0.104	0.107	0.1
0.108	0.107	0.108	0.105	0.101	0.107	0.103	0.105	0.111	0.104	0.104	0.113	0.11	0.11	0.119	0.105	0.103	0.101	0.106	0.113	0.111	0.102	0.1	0.109	0.107	0.103	0.107	0.097	0.107	0.106	0.11	0.101	0.097	0.099	0.107	0.11	0.098	0.103	0.105	0.114	0.106	0.105	0.109	0.098	0.11	0.099	0.106	0.11	0.106	0.102
0.107	0.105	0.111	0.109	0.102	0.11	0.105	0.105	0.111	0.108	0.103	0.119	0.109	0.108	0.119	0.107	0.102	0.103	0.106	0.114	0.111	0.105	0.103	0.115	0.105	0.102	0.108	0.1	0.107	0.115	0.112	0.105	0.102	0.106	0.11	0.11	0.101	0.102	0.106	0.114	0.108	0.104	0.109	0.101	0.115	0.1	0.104	0.108	0.109	0.102
0.108	0.106	0.109	0.11	0.104	0.115	0.105	0.105	0.109	0.11	0.107	0.116	0.109	0.109	0.119	0.108	0.105	0.108	0.11	0.118	0.111	0.109	0.106	0.113	0.105	0.103	0.111	0.102	0.11	0.115	0.112	0.108	0.113	0.104	0.112	0.11	0.102	0.104	0.113	0.115	0.111	0.106	0.105	0.102	0.111	0.101	0.106	0.108	0.11	0.102
0.109	0.107	0.112	0.111	0.107	0.113	0.108	0.107	0.111	0.113	0.111	0.116	0.108	0.109	0.119	0.109	0.107	0.108	0.112	0.115	0.112	0.111	0.107	0.111	0.109	0.106	0.113	0.105	0.112	0.111	0.117	0.107	0.112	0.107	0.11	0.109	0.104	0.105	0.111	0.116	0.112	0.107	0.111	0.103	0.111	0.103	0.108	0.11	0.112	0.105
0.11	0.108	0.113	0.111	0.11	0.11	0.109	0.107	0.112	0.113	0.11	0.117	0.108	0.11	0.12	0.112	0.107	0.107	0.11	0.115	0.112	0.113	0.107	0.111	0.109	0.108	0.114	0.106	0.111	0.11	0.116	0.108	0.111	0.109	0.11	0.109	0.106	0.107	0.111	0.118	0.113	0.109	0.11	0.105	0.111	0.103	0.11	0.111	0.113	0.106
0.112	0.108	0.113	0.111	0.111	0.111	0.107	0.107	0.112	0.113	0.108	0.117	0.108	0.111	0.119	0.112	0.108	0.108	0.111	0.115	0.112	0.113	0.107	0.112	0.11	0.108	0.115	0.106	0.111	0.111	0.115	0.11	0.109	0.108	0.11	0.109	0.106	0.108	0.111	0.12	0.113	0.109	0.109	0.107	0.111	0.104	0.11	0.111	0.112	0.106
0.112	0.109	0.115	0.114	0.109	0.112	0.107	0.107	0.113	0.113	0.108	0.118	0.108	0.112	0.119	0.112	0.108	0.107	0.112	0.115	0.112	0.113	0.106	0.112	0.11	0.109	0.116	0.105	0.112	0.111	0.115	0.11	0.11	0.109	0.111	0.11	0.107	0.108	0.111	0.122	0.113	0.109	0.111	0.106	0.112	0.104	0.109	0.112	0.113	0.108
0.111	0.109	0.116	0.115	0.108	0.112	0.11	0.108	0.113	0.114	0.109	0.118	0.11	0.113	0.119	0.113	0.108	0.108	0.112	0.115	0.112	0.113	0.107	0.113	0.11	0.11	0.117	0.106	0.113	0.112	0.117	0.111	0.109	0.11	0.112	0.111	0.107	0.108	0.112	0.121	0.113	0.109	0.111	0.106	0.112	0.106	0.11	0.111	0.115	0.108
0.112	0.11	0.117	0.116	0.108	0.112	0.111	0.109	0.113	0.115	0.108	0.118	0.111	0.114	0.12	0.113	0.108	0.108	0.114	0.116	0.113	0.113	0.108	0.113	0.111	0.11	0.117	0.107	0.114	0.112	0.117	0.112	0.111	0.111	0.113	0.111	0.108	0.108	0.112	0.121	0.113	0.11	0.113	0.107	0.112	0.106	0.11	0.111	0.116	0.11
0.113	0.109	0.116	0.116	0.109	0.112	0.111	0.11	0.114	0.116	0.109	0.118	0.111	0.114	0.119	0.113	0.109	0.109	0.113	0.115	0.113	0.114	0.108	0.113	0.112	0.111	0.118	0.108	0.114	0.113	0.118	0.114	0.112	0.11	0.114	0.112	0.109	0.109	0.112	0.12	0.113	0.11	0.113	0.107	0.113	0.107	0.109	0.112	0.117	0.111
0.113	0.11	0.116	0.116	0.11	0.113	0.112	0.11	0.114	0.117	0.109	0.119	0.111	0.114	0.12	0.113	0.11	0.109	0.113	0.115	0.114	0.114	0.109	0.113	0.114	0.111	0.119	0.109	0.115	0.113	0.12	0.116	0.113	0.111	0.115	0.112	0.11	0.11	0.113	0.121	0.113	0.11	0.113	0.108	0.113	0.108	0.109	0.112	0.118	0.113
0.114	0.11	0.115	0.117	0.11	0.113	0.112	0.111	0.114	0.119	0.109	0.119	0.112	0.115	0.12	0.113	0.111	0.11	0.114	0.115	0.114	0.114	0.109	0.114	0.114	0.111	0.119	0.11	0.115	0.113	0.121	0.118	0.114	0.112	0.115	0.113	0.111	0.111	0.113	0.121	0.113	0.11	0.114	0.108	0.113	0.108	0.108	0.113	0.118	0.114
0.115	0.111	0.116	0.117	0.111	0.114	0.113	0.112	0.115	0.121	0.11	0.12	0.113	0.116	0.12	0.113	0.113	0.11	0.115	0.115	0.114	0.114	0.11	0.114	0.113	0.112	0.12	0.111	0.116	0.114	0.122	0.12	0.115	0.113	0.116	0.113	0.111	0.112	0.113	0.122	0.114	0.11	0.114	0.109	0.113	0.109	0.109	0.113	0.119	0.116
0.115	0.112	0.117	0.119	0.112	0.114	0.113	0.113	0.116	0.123	0.111	0.12	0.114	0.117	0.121	0.114	0.114	0.111	0.116	0.115	0.115	0.114	0.111	0.114	0.115	0.113	0.121	0.112	0.116	0.114	0.124	0.122	0.116	0.114	0.117	0.114	0.112	0.112	0.114	0.122	0.114	0.111	0.115	0.109	0.114	0.11	0.109	0.113	0.12	0.115
0.116	0.112	0.118	0.12	0.114	0.115	0.114	0.114	0.116	0.125	0.112	0.121	0.114	0.118	0.121	0.114	0.114	0.112	0.116	0.116	0.116	0.115	0.113	0.115	0.115	0.115	0.121	0.112	0.117	0.114	0.126	0.123	0.118	0.115	0.118	0.115	0.113	0.113	0.114	0.123	0.115	0.112	0.115	0.11	0.114	0.11	0.11	0.114	0.121	0.115
0.117	0.114	0.119	0.122	0.115	0.116	0.115	0.115	0.117	0.126	0.113	0.122	0.115	0.12	0.122	0.115	0.114	0.113	0.117	0.116	0.117	0.115	0.113	0.115	0.116	0.116	0.122	0.112	0.117	0.115	0.127	0.124	0.12	0.116	0.119	0.116	0.113	0.114	0.115	0.124	0.116	0.112	0.116	0.111	0.115	0.111	0.111	0.114	0.122	0.115
0.118	0.115	0.121	0.124	0.116	0.117	0.116	0.116	0.118	0.126	0.115	0.124	0.115	0.122	0.124	0.115	0.115	0.114	0.118	0.117	0.119	0.116	0.115	0.117	0.117	0.118	0.123	0.113	0.118	0.115	0.128	0.124	0.122	0.117	0.12	0.117	0.115	0.116	0.116	0.126	0.116	0.113	0.118	0.112	0.115	0.112	0.112	0.115	0.123	0.116
0.12	0.117	0.122	0.125	0.117	0.119	0.117	0.118	0.12	0.127	0.115	0.124	0.117	0.123	0.126	0.116	0.116	0.116	0.119	0.118	0.121	0.117	0.116	0.117	0.118	0.12	0.125	0.114	0.119	0.116	0.128	0.125	0.124	0.12	0.122	0.118	0.116	0.117	0.116	0.126	0.117	0.114	0.119	0.113	0.117	0.112	0.112	0.116	0.125	0.117
0.122	0.119	0.124	0.125	0.118	0.121	0.118	0.12	0.122	0.127	0.116	0.125	0.118	0.124	0.128	0.117	0.118	0.118	0.121	0.119	0.122	0.118	0.118	0.119	0.119	0.121	0.126	0.116	0.121	0.117	0.128	0.126	0.127	0.122	0.124	0.121	0.117	0.119	0.117	0.128	0.118	0.115	0.121	0.114	0.118	0.113	0.113	0.118	0.126	0.119
0.125	0.121	0.124	0.126	0.118	0.121	0.121	0.121	0.123	0.128	0.117	0.126	0.12	0.125	0.129	0.119	0.119	0.12	0.123	0.121	0.123	0.12	0.118	0.121	0.12	0.123	0.127	0.117	0.122	0.118	0.129	0.128	0.129	0.125	0.125	0.122	0.118	0.121	0.118	0.129	0.119	0.116	0.122	0.116	0.12	0.115	0.114	0.121	0.126	0.12
0.128	0.122	0.126	0.126	0.12	0.122	0.123	0.122	0.125	0.128	0.118	0.129	0.122	0.125	0.131	0.122	0.12	0.121	0.124	0.122	0.125	0.122	0.119	0.123	0.122	0.123	0.129	0.119	0.124	0.119	0.13	0.13	0.132	0.127	0.127	0.124	0.12	0.122	0.119	0.131	0.121	0.117	0.123	0.117	0.122	0.117	0.115	0.123	0.127	0.12
0.132	0.124	0.129	0.126	0.122	0.125	0.126	0.124	0.127	0.129	0.12	0.131	0.124	0.127	0.133	0.125	0.121	0.124	0.125	0.124	0.128	0.124	0.12	0.124	0.124	0.124	0.13	0.121	0.126	0.121	0.13	0.133	0.135	0.13	0.129	0.126	0.123	0.123	0.12	0.132	0.123	0.12	0.124	0.118	0.124	0.119	0.117	0.124	0.128	0.122
0.137	0.127	0.132	0.128	0.124	0.128	0.129	0.127	0.13	0.13	0.121	0.134	0.126	0.13	0.135	0.128	0.122	0.127	0.126	0.126	0.13	0.127	0.121	0.127	0.127	0.124	0.131	0.122	0.127	0.123	0.13	0.134	0.138	0.133	0.131	0.128	0.127	0.124	0.122	0.133	0.124	0.122	0.125	0.119	0.126	0.122	0.118	0.126	0.13	0.123
0.139	0.131	0.135	0.129	0.126	0.132	0.132	0.13	0.134	0.133	0.123	0.136	0.129	0.134	0.138	0.131	0.124	0.131	0.129	0.127	0.132	0.132	0.123	0.129	0.128	0.125	0.132	0.123	0.128	0.124	0.135	0.134	0.142	0.137	0.133	0.129	0.131	0.125	0.125	0.134	0.125	0.123	0.127	0.12	0.128	0.126	0.12	0.131	0.131	0.124
0.137	0.136	0.138	0.131	0.129	0.137	0.136	0.134	0.137	0.134	0.125	0.139	0.133	0.139	0.141	0.132	0.126	0.135	0.132	0.129	0.136	0.134	0.125	0.132	0.129	0.126	0.132	0.125	0.129	0.126	0.136	0.132	0.143	0.138	0.136	0.131	0.135	0.126	0.125	0.135	0.126	0.125	0.13	0.122	0.13	0.128	0.121	0.135	0.133	0.125
0.134	0.138	0.14	0.133	0.135	0.141	0.14	0.137	0.138	0.135	0.127	0.141	0.136	0.141	0.143	0.131	0.13	0.139	0.134	0.132	0.138	0.136	0.126	0.136	0.131	0.127	0.133	0.126	0.13	0.127	0.139	0.13	0.142	0.134	0.138	0.133	0.137	0.127	0.127	0.137	0.128	0.126	0.133	0.123	0.133	0.13	0.123	0.138	0.134	0.126
0.133	0.134	0.139	0.135	0.137	0.143	0.142	0.137	0.139	0.136	0.13	0.145	0.141	0.137	0.146	0.13	0.133	0.14	0.134	0.135	0.14	0.135	0.129	0.141	0.138	0.126	0.134	0.129	0.132	0.128	0.142	0.132	0.14	0.131	0.144	0.136	0.139	0.128	0.128	0.138	0.13	0.127	0.135	0.125	0.138	0.134	0.125	0.14	0.134	0.13
0.134	0.129	0.138	0.137	0.136	0.143	0.141	0.135	0.138	0.138	0.132	0.148	0.141	0.135	0.148	0.13	0.131	0.141	0.132	0.14	0.14	0.131	0.129	0.146	0.142	0.127	0.136	0.131	0.133	0.128	0.145	0.131	0.14	0.133	0.147	0.142	0.14	0.129	0.13	0.139	0.132	0.129	0.133	0.128	0.142	0.134	0.128	0.138	0.135	0.136
0.135	0.131	0.14	0.14	0.134	0.141	0.142	0.134	0.14	0.14	0.136	0.151	0.138	0.134	0.149	0.131	0.128	0.141	0.131	0.142	0.141	0.13	0.128	0.148	0.144	0.127	0.137	0.133	0.135	0.129	0.147	0.134	0.142	0.135	0.148	0.144	0.141	0.13	0.131	0.142	0.133	0.133	0.13	0.133	0.144	0.131	0.132	0.137	0.137	0.136
0.138	0.135	0.139	0.142	0.132	0.14	0.139	0.132	0.139	0.142	0.139	0.152	0.135	0.136	0.148	0.134	0.128	0.14	0.132	0.143	0.14	0.135	0.128	0.149	0.146	0.128	0.139	0.134	0.137	0.13	0.15	0.135	0.14	0.137	0.149	0.147	0.142	0.129	0.132	0.144	0.135	0.136	0.132	0.137	0.148	0.128	0.133	0.135	0.139	0.135
0.14	0.139	0.142	0.146	0.132	0.141	0.136	0.135	0.141	0.146	0.14	0.15	0.134	0.14	0.148	0.136	0.128	0.14	0.133	0.143	0.141	0.136	0.129	0.15	0.145	0.13	0.14	0.13	0.14	0.131	0.152	0.137	0.138	0.139	0.147	0.15	0.14	0.129	0.133	0.146	0.137	0.139	0.135	0.139	0.148	0.124	0.135	0.134	0.14	0.135
0.141	0.141	0.144	0.149	0.132	0.143	0.136	0.138	0.144	0.15	0.139	0.151	0.135	0.147	0.149	0.138	0.13	0.136	0.134	0.143	0.142	0.137	0.132	0.147	0.143	0.131	0.144	0.129	0.143	0.133	0.154	0.138	0.138	0.141	0.146	0.149	0.141	0.13	0.135	0.148	0.14	0.142	0.138	0.139	0.146	0.124	0.137	0.135	0.14	0.134
0.139	0.143	0.145	0.151	0.135	0.145	0.137	0.14	0.145	0.154	0.138	0.153	0.136	0.149	0.15	0.141	0.133	0.137	0.136	0.141	0.145	0.141	0.134	0.144	0.14	0.133	0.146	0.131	0.146	0.135	0.155	0.14	0.138	0.141	0.145	0.147	0.143	0.133	0.138	0.149	0.141	0.143	0.14	0.138	0.144	0.126	0.137	0.137	0.142	0.133
0.141	0.143	0.148	0.155	0.137	0.146	0.14	0.142	0.148	0.156	0.138	0.155	0.138	0.152	0.153	0.144	0.135	0.138	0.138	0.141	0.148	0.145	0.137	0.141	0.135	0.134	0.15	0.133	0.149	0.137	0.157	0.141	0.137	0.142	0.144	0.145	0.14	0.135	0.14	0.149	0.143	0.142	0.141	0.137	0.143	0.13	0.135	0.139	0.145	0.134
0.147	0.143	0.151	0.157	0.14	0.151	0.142	0.147	0.151	0.157	0.139	0.158	0.141	0.155	0.155	0.146	0.138	0.14	0.14	0.142	0.151	0.147	0.14	0.142	0.135	0.136	0.15	0.136	0.151	0.14	0.158	0.143	0.138	0.143	0.147	0.145	0.14	0.137	0.144	0.149	0.144	0.14	0.143	0.139	0.145	0.133	0.133	0.142	0.145	0.137
0.152	0.145	0.153	0.16	0.142	0.154	0.143	0.151	0.152	0.16	0.14	0.16	0.144	0.156	0.157	0.15	0.141	0.143	0.145	0.143	0.154	0.15	0.143	0.143	0.137	0.137	0.148	0.137	0.151	0.144	0.16	0.144	0.139	0.143	0.15	0.145	0.14	0.139	0.146	0.149	0.144	0.138	0.147	0.139	0.146	0.135	0.134	0.145	0.147	0.139
0.155	0.15	0.156	0.162	0.144	0.156	0.145	0.155	0.155	0.162	0.139	0.161	0.144	0.159	0.16	0.153	0.143	0.146	0.149	0.144	0.157	0.154	0.145	0.146	0.138	0.138	0.147	0.139	0.151	0.148	0.162	0.145	0.142	0.145	0.154	0.146	0.138	0.141	0.148	0.148	0.144	0.135	0.15	0.14	0.148	0.137	0.139	0.148	0.152	0.141
0.157	0.155	0.161	0.164	0.147	0.161	0.146	0.158	0.158	0.165	0.141	0.163	0.148	0.164	0.165	0.156	0.145	0.149	0.152	0.148	0.162	0.158	0.148	0.149	0.139	0.139	0.148	0.141	0.149	0.149	0.164	0.148	0.146	0.148	0.157	0.148	0.138	0.143	0.147	0.148	0.143	0.134	0.153	0.138	0.152	0.139	0.139	0.15	0.154	0.143
0.16	0.158	0.162	0.166	0.149	0.162	0.148	0.159	0.161	0.167	0.145	0.164	0.151	0.166	0.167	0.159	0.147	0.15	0.152	0.149	0.164	0.162	0.151	0.15	0.139	0.14	0.147	0.143	0.147	0.149	0.166	0.149	0.15	0.149	0.159	0.149	0.138	0.144	0.147	0.149	0.142	0.134	0.155	0.14	0.153	0.141	0.137	0.153	0.157	0.145
0.163	0.157	0.163	0.169	0.152	0.163	0.149	0.162	0.164	0.17	0.145	0.169	0.152	0.167	0.17	0.164	0.15	0.154	0.154	0.152	0.168	0.165	0.154	0.152	0.141	0.142	0.147	0.144	0.144	0.149	0.168	0.151	0.149	0.151	0.161	0.151	0.139	0.144	0.148	0.148	0.142	0.134	0.158	0.142	0.157	0.143	0.141	0.156	0.16	0.147
0.166	0.161	0.167	0.171	0.155	0.167	0.148	0.164	0.167	0.172	0.148	0.172	0.151	0.171	0.175	0.166	0.153	0.157	0.155	0.155	0.17	0.167	0.157	0.156	0.143	0.144	0.149	0.147	0.143	0.148	0.17	0.154	0.153	0.153	0.162	0.153	0.142	0.145	0.146	0.148	0.144	0.135	0.161	0.146	0.16	0.144	0.143	0.159	0.162	0.149
0.169	0.164	0.169	0.173	0.158	0.171	0.149	0.166	0.17	0.175	0.15	0.176	0.149	0.173	0.177	0.168	0.156	0.159	0.155	0.158	0.173	0.171	0.159	0.157	0.144	0.145	0.151	0.148	0.144	0.147	0.172	0.157	0.152	0.156	0.17	0.155	0.142	0.146	0.143	0.152	0.146	0.136	0.163	0.152	0.164	0.147	0.145	0.162	0.165	0.151
0.171	0.168	0.171	0.176	0.161	0.173	0.151	0.169	0.173	0.177	0.152	0.175	0.157	0.175	0.18	0.17	0.159	0.163	0.156	0.162	0.176	0.173	0.162	0.16	0.146	0.147	0.15	0.15	0.146	0.147	0.174	0.159	0.153	0.159	0.166	0.158	0.143	0.147	0.143	0.152	0.146	0.137	0.166	0.158	0.166	0.149	0.148	0.165	0.167	0.153
0.174	0.171	0.173	0.179	0.163	0.176	0.154	0.17	0.176	0.18	0.156	0.174	0.161	0.177	0.181	0.173	0.161	0.166	0.159	0.163	0.177	0.176	0.165	0.163	0.148	0.148	0.153	0.151	0.148	0.148	0.175	0.162	0.155	0.162	0.165	0.161	0.144	0.149	0.144	0.152	0.147	0.138	0.168	0.161	0.171	0.152	0.152	0.168	0.169	0.156
0.177	0.174	0.176	0.181	0.166	0.181	0.16	0.174	0.177	0.183	0.157	0.177	0.163	0.18	0.187	0.175	0.164	0.169	0.16	0.167	0.185	0.178	0.168	0.166	0.148	0.15	0.156	0.153	0.154	0.148	0.178	0.163	0.157	0.164	0.174	0.164	0.147	0.151	0.148	0.152	0.148	0.14	0.171	0.164	0.173	0.155	0.155	0.171	0.171	0.158
0.18	0.177	0.182	0.184	0.169	0.183	0.165	0.176	0.178	0.186	0.163	0.18	0.163	0.183	0.192	0.178	0.167	0.172	0.162	0.167	0.183	0.181	0.171	0.169	0.149	0.151	0.156	0.155	0.159	0.149	0.18	0.168	0.159	0.167	0.169	0.167	0.149	0.153	0.153	0.156	0.15	0.143	0.173	0.166	0.176	0.157	0.158	0.174	0.172	0.161
0.183	0.179	0.184	0.187	0.172	0.186	0.168	0.178	0.185	0.189	0.167	0.183	0.169	0.185	0.194	0.181	0.17	0.175	0.166	0.17	0.188	0.184	0.173	0.172	0.149	0.152	0.161	0.157	0.16	0.151	0.183	0.168	0.162	0.169	0.183	0.17	0.151	0.154	0.152	0.16	0.152	0.145	0.175	0.161	0.179	0.16	0.161	0.177	0.175	0.163
0.186	0.182	0.19	0.19	0.175	0.192	0.17	0.181	0.186	0.193	0.165	0.188	0.173	0.193	0.196	0.184	0.173	0.18	0.169	0.174	0.194	0.187	0.176	0.177	0.154	0.154	0.164	0.158	0.16	0.154	0.185	0.176	0.165	0.172	0.174	0.175	0.153	0.156	0.151	0.162	0.155	0.147	0.179	0.163	0.184	0.163	0.164	0.181	0.178	0.166
0.189	0.186	0.196	0.193	0.177	0.194	0.172	0.182	0.185	0.196	0.175	0.192	0.175	0.193	0.201	0.187	0.176	0.184	0.174	0.177	0.198	0.189	0.179	0.181	0.155	0.156	0.168	0.16	0.158	0.157	0.188	0.175	0.169	0.175	0.185	0.179	0.155	0.157	0.152	0.162	0.157	0.149	0.182	0.166	0.187	0.165	0.167	0.184	0.18	0.169
0.191	0.188	0.198	0.196	0.18	0.199	0.175	0.187	0.193	0.199	0.173	0.196	0.177	0.198	0.203	0.19	0.179	0.187	0.177	0.179	0.2	0.193	0.182	0.185	0.155	0.156	0.171	0.162	0.156	0.158	0.19	0.183	0.173	0.177	0.186	0.182	0.157	0.158	0.154	0.164	0.16	0.151	0.184	0.169	0.19	0.168	0.169	0.187	0.183	0.171
0.195	0.191	0.203	0.2	0.184	0.203	0.181	0.19	0.194	0.203	0.179	0.2	0.181	0.202	0.205	0.194	0.184	0.193	0.18	0.182	0.202	0.197	0.185	0.188	0.157	0.159	0.171	0.165	0.159	0.16	0.193	0.182	0.177	0.181	0.189	0.186	0.159	0.16	0.156	0.169	0.162	0.153	0.188	0.173	0.194	0.172	0.172	0.193	0.186	0.174
0.198	0.194	0.208	0.204	0.188	0.206	0.185	0.195	0.197	0.207	0.181	0.204	0.184	0.206	0.209	0.197	0.187	0.197	0.183	0.185	0.209	0.2	0.189	0.193	0.16	0.162	0.174	0.167	0.162	0.162	0.196	0.189	0.181	0.183	0.197	0.191	0.161	0.163	0.159	0.169	0.165	0.156	0.19	0.178	0.197	0.176	0.175	0.196	0.189	0.177
0.201	0.197	0.212	0.207	0.192	0.21	0.188	0.199	0.2	0.211	0.187	0.209	0.186	0.209	0.214	0.2	0.191	0.201	0.186	0.189	0.213	0.203	0.191	0.196	0.162	0.164	0.177	0.169	0.166	0.165	0.199	0.194	0.185	0.186	0.202	0.195	0.163	0.166	0.171	0.171	0.168	0.158	0.194	0.183	0.204	0.179	0.178	0.2	0.192	0.18
0.204	0.2	0.224	0.211	0.195	0.218	0.192	0.202	0.205	0.215	0.187	0.213	0.188	0.212	0.222	0.204	0.194	0.204	0.188	0.192	0.219	0.207	0.194	0.201	0.166	0.166	0.178	0.171	0.171	0.165	0.201	0.199	0.19	0.19	0.203	0.2	0.167	0.17	0.162	0.174	0.17	0.16	0.197	0.187	0.212	0.182	0.18	0.203	0.195	0.183
0.209	0.204	0.23	0.214	0.199	0.222	0.197	0.207	0.208	0.219	0.192	0.219	0.192	0.219	0.223	0.208	0.198	0.21	0.191	0.196	0.223	0.21	0.198	0.204	0.169	0.171	0.183	0.174	0.174	0.171	0.205	0.203	0.194	0.193	0.211	0.205	0.168	0.175	0.165	0.176	0.174	0.163	0.2	0.188	0.213	0.185	0.184	0.208	0.198	0.187
0.213	0.209	0.235	0.218	0.203	0.228	0.202	0.213	0.213	0.223	0.193	0.224	0.196	0.224	0.229	0.211	0.2	0.215	0.194	0.2	0.23	0.214	0.201	0.208	0.172	0.173	0.186	0.175	0.176	0.171	0.207	0.207	0.199	0.196	0.211	0.21	0.17	0.179	0.171	0.177	0.176	0.166	0.203	0.192	0.213	0.187	0.186	0.213	0.201	0.19
0.218	0.216	0.242	0.223	0.208	0.236	0.207	0.22	0.218	0.228	0.201	0.231	0.2	0.23	0.233	0.215	0.204	0.221	0.197	0.204	0.233	0.218	0.203	0.213	0.175	0.177	0.19	0.178	0.18	0.177	0.212	0.211	0.203	0.199	0.221	0.217	0.171	0.183	0.176	0.179	0.179	0.169	0.206	0.194	0.221	0.191	0.19	0.219	0.204	0.193
0.222	0.222	0.248	0.227	0.213	0.245	0.21	0.226	0.225	0.233	0.207	0.238	0.203	0.238	0.241	0.22	0.208	0.227	0.201	0.21	0.242	0.223	0.207	0.218	0.178	0.181	0.195	0.181	0.179	0.176	0.215	0.215	0.209	0.203	0.225	0.222	0.175	0.186	0.177	0.179	0.181	0.172	0.21	0.199	0.227	0.195	0.194	0.224	0.207	0.196
0.227	0.226	0.251	0.232	0.218	0.251	0.216	0.231	0.229	0.237	0.209	0.245	0.206	0.243	0.248	0.225	0.211	0.232	0.204	0.213	0.246	0.227	0.21	0.222	0.182	0.183	0.197	0.184	0.181	0.178	0.218	0.219	0.213	0.208	0.23	0.225	0.18	0.189	0.178	0.181	0.183	0.174	0.214	0.208	0.234	0.197	0.197	0.229	0.211	0.2
0.234	0.231	0.257	0.236	0.224	0.258	0.224	0.237	0.235	0.243	0.213	0.252	0.21	0.25	0.253	0.23	0.215	0.238	0.208	0.22	0.254	0.232	0.215	0.228	0.185	0.187	0.201	0.188	0.186	0.178	0.222	0.224	0.22	0.213	0.234	0.231	0.185	0.192	0.181	0.18	0.187	0.176	0.218	0.205	0.241	0.2	0.201	0.237	0.215	0.204
0.239	0.238	0.264	0.241	0.23	0.267	0.23	0.244	0.244	0.25	0.221	0.26	0.216	0.256	0.262	0.236	0.219	0.245	0.212	0.225	0.261	0.237	0.219	0.235	0.185	0.191	0.206	0.191	0.19	0.182	0.225	0.23	0.225	0.218	0.24	0.237	0.191	0.196	0.185	0.185	0.189	0.18	0.223	0.213	0.248	0.204	0.205	0.243	0.218	0.209
0.245	0.243	0.269	0.246	0.234	0.273	0.233	0.248	0.25	0.256	0.225	0.268	0.22	0.266	0.274	0.242	0.222	0.252	0.217	0.229	0.278	0.24	0.223	0.24	0.188	0.194	0.21	0.193	0.194	0.184	0.232	0.234	0.23	0.222	0.245	0.243	0.194	0.199	0.193	0.19	0.191	0.182	0.227	0.216	0.254	0.208	0.209	0.248	0.222	0.212
0.253	0.249	0.276	0.251	0.242	0.279	0.239	0.254	0.258	0.26	0.232	0.275	0.225	0.275	0.279	0.248	0.227	0.258	0.222	0.236	0.284	0.246	0.227	0.247	0.192	0.197	0.213	0.196	0.197	0.186	0.234	0.24	0.238	0.225	0.25	0.249	0.198	0.202	0.183	0.195	0.196	0.185	0.231	0.223	0.263	0.213	0.214	0.258	0.226	0.217
0.262	0.255	0.285	0.257	0.248	0.286	0.247	0.262	0.267	0.268	0.238	0.284	0.229	0.283	0.291	0.252	0.234	0.264	0.226	0.243	0.294	0.252	0.232	0.253	0.194	0.2	0.217	0.199	0.2	0.189	0.238	0.246	0.244	0.231	0.256	0.254	0.202	0.205	0.194	0.198	0.2	0.188	0.236	0.229	0.271	0.217	0.218	0.264	0.23	0.221
0.268	0.261	0.304	0.26	0.253	0.294	0.253	0.27	0.275	0.278	0.244	0.292	0.234	0.296	0.306	0.262	0.238	0.27	0.231	0.247	0.304	0.257	0.235	0.259	0.2	0.202	0.22	0.201	0.203	0.19	0.244	0.254	0.251	0.238	0.262	0.26	0.206	0.208	0.202	0.2	0.204	0.191	0.24	0.234	0.282	0.221	0.222	0.269	0.234	0.224
0.276	0.268	0.309	0.268	0.258	0.302	0.257	0.281	0.283	0.287	0.25	0.296	0.24	0.305	0.311	0.266	0.242	0.276	0.235	0.253	0.31	0.263	0.24	0.266	0.204	0.205	0.223	0.204	0.206	0.192	0.247	0.266	0.258	0.244	0.271	0.266	0.21	0.21	0.203	0.204	0.207	0.193	0.245	0.239	0.29	0.226	0.225	0.275	0.238	0.228
0.281	0.278	0.322	0.275	0.263	0.317	0.265	0.292	0.292	0.295	0.257	0.312	0.247	0.312	0.321	0.273	0.251	0.283	0.24	0.264	0.319	0.269	0.243	0.272	0.207	0.206	0.228	0.208	0.21	0.194	0.252	0.271	0.264	0.252	0.287	0.272	0.214	0.214	0.206	0.209	0.212	0.196	0.251	0.247	0.3	0.23	0.23	0.282	0.243	0.232
0.288	0.287	0.338	0.282	0.27	0.331	0.274	0.305	0.302	0.303	0.263	0.323	0.251	0.323	0.328	0.283	0.26	0.289	0.245	0.277	0.326	0.276	0.248	0.279	0.211	0.209	0.233	0.21	0.214	0.196	0.256	0.275	0.27	0.254	0.289	0.278	0.217	0.217	0.21	0.211	0.216	0.199	0.254	0.252	0.308	0.234	0.243	0.289	0.247	0.237
0.299	0.296	0.355	0.294	0.28	0.346	0.279	0.313	0.307	0.314	0.27	0.338	0.258	0.324	0.333	0.291	0.265	0.297	0.253	0.286	0.332	0.284	0.252	0.284	0.216	0.212	0.236	0.213	0.217	0.199	0.267	0.284	0.278	0.267	0.298	0.283	0.221	0.219	0.214	0.215	0.219	0.202	0.263	0.258	0.319	0.239	0.251	0.297	0.252	0.245
0.314	0.307	0.368	0.301	0.288	0.359	0.287	0.322	0.318	0.329	0.277	0.343	0.268	0.336	0.342	0.31	0.271	0.308	0.256	0.293	0.34	0.302	0.258	0.289	0.22	0.214	0.241	0.216	0.222	0.201	0.278	0.291	0.284	0.269	0.303	0.289	0.225	0.222	0.217	0.218	0.224	0.204	0.267	0.265	0.327	0.246	0.255	0.303	0.255	0.259
0.339	0.321	0.382	0.313	0.298	0.374	0.295	0.332	0.331	0.344	0.284	0.35	0.283	0.347	0.351	0.304	0.278	0.317	0.267	0.299	0.347	0.303	0.266	0.296	0.224	0.217	0.249	0.218	0.225	0.201	0.278	0.297	0.294	0.283	0.313	0.296	0.231	0.228	0.221	0.225	0.233	0.207	0.283	0.278	0.334	0.252	0.259	0.309	0.263	0.264
0.381	0.337	0.394	0.321	0.308	0.392	0.304	0.344	0.345	0.365	0.296	0.362	0.287	0.358	0.366	0.316	0.286	0.326	0.275	0.306	0.354	0.322	0.273	0.304	0.228	0.224	0.254	0.222	0.229	0.207	0.285	0.301	0.302	0.287	0.322	0.304	0.237	0.234	0.226	0.228	0.241	0.211	0.291	0.29	0.343	0.258	0.265	0.316	0.272	0.27
0.406	0.349	0.401	0.333	0.322	0.408	0.313	0.357	0.357	0.386	0.304	0.376	0.297	0.371	0.375	0.333	0.296	0.337	0.283	0.309	0.362	0.328	0.28	0.311	0.232	0.23	0.259	0.224	0.231	0.21	0.291	0.306	0.309	0.292	0.332	0.31	0.249	0.239	0.228	0.245	0.248	0.214	0.301	0.294	0.351	0.263	0.272	0.323	0.281	0.275
0.415	0.366	0.414	0.347	0.344	0.425	0.324	0.371	0.379	0.398	0.317	0.393	0.301	0.383	0.392	0.334	0.304	0.349	0.299	0.319	0.373	0.334	0.291	0.321	0.237	0.243	0.279	0.228	0.235	0.214	0.301	0.314	0.313	0.303	0.336	0.319	0.252	0.245	0.232	0.254	0.254	0.216	0.318	0.302	0.36	0.268	0.279	0.333	0.289	0.283
0.418	0.382	0.436	0.361	0.357	0.456	0.337	0.384	0.395	0.407	0.328	0.408	0.316	0.396	0.403	0.352	0.312	0.358	0.309	0.323	0.382	0.358	0.298	0.331	0.243	0.242	0.28	0.231	0.24	0.217	0.308	0.317	0.321	0.308	0.344	0.328	0.255	0.254	0.236	0.259	0.257	0.22	0.319	0.308	0.37	0.275	0.283	0.342	0.295	0.289
0.426	0.393	0.46	0.373	0.371	0.485	0.353	0.395	0.408	0.417	0.343	0.423	0.319	0.402	0.416	0.378	0.32	0.366	0.317	0.327	0.392	0.365	0.308	0.339	0.247	0.246	0.287	0.234	0.248	0.22	0.321	0.322	0.328	0.319	0.351	0.335	0.263	0.257	0.239	0.268	0.261	0.223	0.329	0.317	0.383	0.281	0.289	0.353	0.304	0.294
0.449	0.41	0.486	0.381	0.38	0.505	0.379	0.417	0.431	0.422	0.357	0.452	0.333	0.418	0.435	0.393	0.328	0.376	0.325	0.336	0.404	0.378	0.317	0.349	0.257	0.252	0.292	0.237	0.259	0.234	0.325	0.329	0.334	0.324	0.36	0.343	0.266	0.262	0.245	0.266	0.263	0.226	0.339	0.324	0.397	0.288	0.296	0.365	0.305	0.301
0.469	0.422	0.51	0.389	0.389	0.544	0.398	0.43	0.451	0.439	0.372	0.476	0.344	0.429	0.447	0.406	0.332	0.378	0.331	0.345	0.417	0.39	0.326	0.361	0.268	0.259	0.296	0.242	0.262	0.249	0.338	0.337	0.342	0.324	0.367	0.353	0.276	0.268	0.254	0.274	0.261	0.229	0.349	0.336	0.412	0.294	0.302	0.376	0.316	0.304
0.488	0.438	0.534	0.401	0.405	0.569	0.423	0.459	0.473	0.452	0.388	0.493	0.359	0.443	0.468	0.411	0.343	0.384	0.343	0.353	0.431	0.397	0.33	0.368	0.271	0.263	0.3	0.248	0.261	0.247	0.346	0.343	0.349	0.333	0.373	0.358	0.28	0.276	0.271	0.278	0.271	0.233	0.36	0.342	0.432	0.301	0.309	0.387	0.32	0.311
0.515	0.458	0.566	0.41	0.422	0.635	0.445	0.486	0.501	0.467	0.405	0.528	0.371	0.463	0.491	0.428	0.353	0.393	0.355	0.366	0.443	0.409	0.338	0.377	0.275	0.268	0.306	0.258	0.269	0.255	0.353	0.35	0.357	0.339	0.384	0.364	0.289	0.282	0.274	0.29	0.278	0.237	0.369	0.351	0.46	0.308	0.316	0.4	0.327	0.317
0.548	0.477	0.61	0.421	0.439	0.688	0.47	0.516	0.533	0.492	0.423	0.583	0.384	0.486	0.512	0.44	0.358	0.409	0.364	0.376	0.456	0.421	0.344	0.385	0.288	0.272	0.312	0.262	0.272	0.262	0.363	0.355	0.367	0.346	0.391	0.372	0.287	0.284	0.28	0.297	0.272	0.244	0.38	0.358	0.499	0.319	0.32	0.408	0.334	0.322
0.584	0.494	0.661	0.43	0.457	0.693	0.498	0.534	0.561	0.518	0.443	0.663	0.4	0.509	0.528	0.447	0.367	0.425	0.374	0.382	0.469	0.428	0.351	0.395	0.305	0.275	0.314	0.265	0.283	0.264	0.372	0.358	0.374	0.35	0.4	0.38	0.302	0.285	0.286	0.293	0.276	0.253	0.389	0.371	0.532	0.324	0.327	0.418	0.344	0.325
0.632	0.516	0.672	0.451	0.516	0.745	0.532	0.561	0.613	0.554	0.467	0.653	0.409	0.531	0.556	0.466	0.378	0.44	0.387	0.397	0.506	0.441	0.36	0.402	0.303	0.278	0.319	0.269	0.287	0.266	0.378	0.369	0.383	0.362	0.408	0.389	0.296	0.288	0.291	0.307	0.288	0.249	0.4	0.379	0.558	0.334	0.34	0.434	0.347	0.332
0.662	0.538	0.681	0.464	0.547	0.691	0.566	0.577	0.66	0.593	0.486	0.681	0.421	0.55	0.573	0.489	0.389	0.458	0.398	0.407	0.519	0.453	0.371	0.407	0.318	0.284	0.32	0.279	0.291	0.27	0.385	0.378	0.396	0.374	0.417	0.397	0.316	0.299	0.292	0.313	0.289	0.259	0.408	0.388	0.593	0.349	0.339	0.448	0.354	0.336
0.691	0.554	0.696	0.487	0.572	0.645	0.592	0.597	0.681	0.637	0.518	0.712	0.433	0.564	0.59	0.515	0.399	0.477	0.405	0.417	0.533	0.474	0.379	0.418	0.322	0.287	0.324	0.283	0.297	0.274	0.392	0.387	0.403	0.378	0.428	0.406	0.301	0.302	0.298	0.31	0.29	0.268	0.415	0.398	0.606	0.352	0.348	0.475	0.357	0.34
0.681	0.574	0.686	0.524	0.582	0.642	0.619	0.636	0.686	0.659	0.544	0.723	0.439	0.583	0.614	0.53	0.408	0.499	0.41	0.425	0.548	0.49	0.39	0.431	0.324	0.291	0.33	0.292	0.305	0.276	0.395	0.396	0.404	0.387	0.441	0.417	0.315	0.303	0.305	0.314	0.3	0.275	0.419	0.41	0.617	0.361	0.355	0.491	0.363	0.344
0.682	0.605	0.687	0.569	0.609	0.644	0.665	0.68	0.7	0.671	0.582	0.681	0.452	0.603	0.659	0.554	0.42	0.52	0.418	0.439	0.577	0.505	0.397	0.44	0.333	0.297	0.334	0.295	0.307	0.28	0.403	0.408	0.417	0.392	0.454	0.43	0.319	0.311	0.309	0.321	0.302	0.271	0.426	0.422	0.647	0.37	0.368	0.538	0.371	0.35
0.649	0.643	0.686	0.635	0.638	0.648	0.681	0.713	0.695	0.641	0.603	0.675	0.471	0.622	0.69	0.566	0.433	0.53	0.426	0.452	0.592	0.522	0.408	0.456	0.344	0.303	0.341	0.303	0.31	0.282	0.409	0.414	0.419	0.402	0.463	0.443	0.334	0.317	0.315	0.328	0.31	0.274	0.438	0.435	0.657	0.377	0.372	0.559	0.386	0.361
0.648	0.672	0.689	0.624	0.679	0.651	0.684	0.728	0.691	0.642	0.646	0.683	0.493	0.639	0.697	0.583	0.441	0.558	0.435	0.466	0.626	0.548	0.417	0.469	0.35	0.305	0.344	0.305	0.312	0.283	0.414	0.426	0.426	0.408	0.495	0.457	0.335	0.32	0.318	0.323	0.308	0.276	0.445	0.448	0.679	0.38	0.379	0.588	0.391	0.364
0.649	0.724	0.69	0.612	0.745	0.653	0.672	0.71	0.69	0.637	0.708	0.686	0.502	0.672	0.699	0.605	0.454	0.576	0.444	0.479	0.655	0.564	0.427	0.486	0.354	0.306	0.347	0.309	0.315	0.286	0.425	0.438	0.436	0.416	0.526	0.471	0.344	0.324	0.322	0.319	0.314	0.281	0.455	0.46	0.703	0.388	0.383	0.615	0.397	0.37
0.657	0.699	0.69	0.616	0.748	0.657	0.68	0.723	0.683	0.638	0.707	0.691	0.519	0.702	0.7	0.625	0.468	0.606	0.456	0.496	0.661	0.58	0.435	0.506	0.361	0.311	0.352	0.318	0.316	0.29	0.431	0.447	0.445	0.424	0.533	0.485	0.353	0.327	0.321	0.328	0.321	0.284	0.466	0.478	0.755	0.396	0.39	0.616	0.405	0.379
0.652	0.7	0.695	0.633	0.741	0.657	0.666	0.706	0.687	0.637	0.734	0.695	0.542	0.715	0.697	0.652	0.483	0.647	0.473	0.518	0.699	0.608	0.445	0.525	0.357	0.316	0.356	0.321	0.321	0.292	0.438	0.462	0.452	0.431	0.563	0.498	0.355	0.331	0.322	0.328	0.326	0.291	0.48	0.496	0.783	0.406	0.399	0.631	0.408	0.384
0.662	0.683	0.694	0.615	0.715	0.658	0.665	0.699	0.688	0.649	0.733	0.695	0.567	0.728	0.695	0.676	0.49	0.641	0.477	0.535	0.745	0.637	0.451	0.546	0.373	0.317	0.358	0.329	0.328	0.297	0.445	0.471	0.466	0.444	0.595	0.507	0.365	0.334	0.333	0.333	0.328	0.29	0.493	0.515	0.792	0.417	0.408	0.654	0.417	0.392
0.667	0.686	0.694	0.62	0.712	0.661	0.662	0.702	0.691	0.649	0.691	0.699	0.591	0.727	0.702	0.695	0.506	0.659	0.496	0.559	0.741	0.639	0.461	0.565	0.372	0.324	0.367	0.331	0.33	0.301	0.455	0.491	0.481	0.45	0.609	0.518	0.374	0.338	0.338	0.352	0.332	0.292	0.509	0.536	0.789	0.435	0.417	0.672	0.427	0.402
0.67	0.688	0.697	0.621	0.686	0.663	0.665	0.705	0.692	0.657	0.676	0.698	0.626	0.725	0.712	0.678	0.529	0.657	0.517	0.583	0.752	0.665	0.476	0.577	0.362	0.329	0.373	0.335	0.333	0.303	0.469	0.504	0.499	0.469	0.637	0.528	0.379	0.34	0.333	0.346	0.338	0.297	0.524	0.56	0.791	0.443	0.429	0.684	0.434	0.409
0.668	0.686	0.697	0.628	0.677	0.665	0.667	0.703	0.694	0.66	0.681	0.701	0.645	0.72	0.709	0.697	0.545	0.659	0.532	0.6	0.726	0.677	0.488	0.589	0.378	0.33	0.373	0.343	0.341	0.309	0.478	0.524	0.517	0.485	0.643	0.543	0.386	0.342	0.331	0.35	0.341	0.3	0.54	0.571	0.771	0.452	0.433	0.72	0.443	0.418
0.671	0.68	0.698	0.628	0.679	0.667	0.668	0.702	0.694	0.662	0.682	0.701	0.664	0.724	0.713	0.684	0.558	0.667	0.548	0.613	0.715	0.672	0.501	0.623	0.387	0.332	0.377	0.345	0.344	0.31	0.494	0.542	0.527	0.493	0.662	0.563	0.391	0.346	0.338	0.363	0.344	0.301	0.56	0.587	0.759	0.465	0.448	0.746	0.452	0.425
0.669	0.679	0.699	0.634	0.686	0.668	0.668	0.702	0.696	0.663	0.682	0.702	0.693	0.726	0.715	0.674	0.573	0.67	0.564	0.626	0.727	0.682	0.516	0.632	0.406	0.334	0.385	0.35	0.35	0.311	0.503	0.558	0.541	0.5	0.681	0.579	0.39	0.351	0.349	0.358	0.35	0.306	0.572	0.601	0.75	0.481	0.455	0.757	0.458	0.435
0.67	0.682	0.7	0.634	0.689	0.668	0.669	0.702	0.696	0.663	0.685	0.705	0.698	0.724	0.716	0.689	0.592	0.678	0.587	0.634	0.727	0.679	0.534	0.654	0.407	0.341	0.388	0.354	0.355	0.317	0.508	0.575	0.554	0.511	0.693	0.598	0.399	0.353	0.357	0.364	0.348	0.307	0.594	0.612	0.746	0.498	0.469	0.73	0.468	0.447
0.671	0.682	0.699	0.634	0.691	0.67	0.672	0.705	0.698	0.668	0.684	0.708	0.696	0.729	0.721	0.686	0.605	0.681	0.607	0.655	0.734	0.686	0.546	0.701	0.405	0.348	0.393	0.358	0.358	0.32	0.523	0.605	0.57	0.522	0.709	0.609	0.405	0.358	0.357	0.374	0.344	0.311	0.605	0.628	0.75	0.509	0.491	0.744	0.478	0.458
0.672	0.684	0.703	0.637	0.689	0.671	0.671	0.705	0.699	0.668	0.681	0.708	0.683	0.732	0.722	0.693	0.633	0.684	0.63	0.672	0.74	0.674	0.56	0.705	0.406	0.349	0.398	0.363	0.36	0.322	0.535	0.617	0.568	0.54	0.748	0.628	0.413	0.363	0.357	0.373	0.354	0.312	0.641	0.643	0.747	0.524	0.508	0.752	0.488	0.466
0.669	0.682	0.703	0.638	0.689	0.669	0.671	0.704	0.7	0.668	0.682	0.712	0.685	0.735	0.724	0.689	0.655	0.687	0.644	0.694	0.739	0.673	0.576	0.698	0.414	0.349	0.405	0.363	0.364	0.322	0.552	0.631	0.57	0.554	0.759	0.63	0.419	0.366	0.357	0.383	0.357	0.314	0.642	0.662	0.755	0.533	0.518	0.709	0.498	0.475
0.671	0.683	0.705	0.64	0.689	0.67	0.672	0.706	0.702	0.668	0.682	0.711	0.691	0.735	0.733	0.698	0.667	0.688	0.663	0.718	0.745	0.679	0.585	0.708	0.428	0.354	0.41	0.368	0.367	0.328	0.569	0.65	0.58	0.567	0.76	0.636	0.428	0.368	0.365	0.391	0.364	0.31	0.658	0.672	0.751	0.544	0.528	0.708	0.51	0.486
0.67	0.685	0.703	0.641	0.691	0.67	0.672	0.706	0.701	0.669	0.682	0.711	0.679	0.741	0.735	0.697	0.662	0.691	0.668	0.727	0.748	0.682	0.601	0.706	0.431	0.356	0.418	0.372	0.371	0.331	0.588	0.66	0.586	0.585	0.757	0.634	0.43	0.371	0.366	0.39	0.367	0.32	0.668	0.69	0.754	0.558	0.542	0.709	0.522	0.495
0.672	0.685	0.705	0.642	0.692	0.669	0.671	0.706	0.702	0.662	0.685	0.71	0.691	0.739	0.737	0.698	0.661	0.693	0.664	0.72	0.75	0.686	0.617	0.708	0.451	0.357	0.421	0.376	0.377	0.335	0.604	0.675	0.588	0.599	0.76	0.638	0.436	0.376	0.371	0.401	0.374	0.32	0.669	0.696	0.755	0.579	0.559	0.72	0.537	0.508
0.673	0.685	0.706	0.643	0.694	0.67	0.674	0.706	0.706	0.667	0.685	0.71	0.695	0.741	0.741	0.702	0.671	0.695	0.667	0.74	0.754	0.689	0.63	0.71	0.461	0.362	0.43	0.383	0.382	0.339	0.615	0.696	0.59	0.611	0.76	0.642	0.445	0.38	0.376	0.401	0.377	0.326	0.679	0.711	0.761	0.576	0.579	0.727	0.56	0.529
0.673	0.684	0.706	0.641	0.697	0.672	0.673	0.707	0.703	0.667	0.686	0.707	0.691	0.741	0.74	0.698	0.663	0.695	0.654	0.731	0.754	0.69	0.654	0.71	0.452	0.368	0.435	0.386	0.387	0.342	0.635	0.704	0.595	0.619	0.748	0.645	0.458	0.385	0.386	0.414	0.383	0.331	0.678	0.703	0.758	0.577	0.587	0.729	0.571	0.545
0.673	0.688	0.706	0.643	0.696	0.675	0.671	0.707	0.707	0.67	0.686	0.707	0.697	0.743	0.745	0.703	0.679	0.696	0.667	0.725	0.759	0.69	0.667	0.714	0.469	0.371	0.444	0.392	0.391	0.346	0.658	0.717	0.602	0.629	0.751	0.648	0.471	0.389	0.382	0.423	0.39	0.331	0.68	0.714	0.766	0.582	0.597	0.735	0.587	0.559
0.672	0.687	0.703	0.641	0.696	0.675	0.671	0.706	0.706	0.669	0.686	0.708	0.697	0.741	0.744	0.703	0.682	0.697	0.67	0.727	0.76	0.689	0.672	0.72	0.482	0.375	0.453	0.394	0.395	0.346	0.676	0.73	0.605	0.644	0.756	0.653	0.482	0.393	0.389	0.427	0.394	0.332	0.683	0.716	0.764	0.596	0.622	0.735	0.608	0.574
0.669	0.686	0.701	0.641	0.694	0.673	0.67	0.705	0.706	0.669	0.685	0.706	0.694	0.741	0.745	0.701	0.685	0.698	0.667	0.726	0.762	0.687	0.677	0.722	0.489	0.38	0.462	0.397	0.399	0.349	0.665	0.747	0.609	0.657	0.758	0.654	0.495	0.396	0.387	0.437	0.396	0.339	0.673	0.72	0.766	0.591	0.625	0.737	0.628	0.584
0.671	0.688	0.702	0.639	0.693	0.672	0.668	0.705	0.707	0.669	0.685	0.703	0.696	0.74	0.747	0.703	0.689	0.699	0.665	0.733	0.762	0.69	0.684	0.723	0.498	0.384	0.472	0.402	0.402	0.355	0.676	0.763	0.615	0.674	0.763	0.655	0.504	0.4	0.396	0.446	0.403	0.338	0.683	0.723	0.768	0.6	0.657	0.739	0.633	0.601
0.674	0.686	0.702	0.638	0.695	0.674	0.672	0.704	0.705	0.666	0.684	0.702	0.699	0.738	0.747	0.703	0.693	0.698	0.669	0.737	0.765	0.691	0.694	0.724	0.513	0.388	0.483	0.407	0.409	0.36	0.67	0.775	0.616	0.666	0.767	0.657	0.513	0.408	0.402	0.448	0.408	0.342	0.689	0.721	0.768	0.612	0.665	0.74	0.65	0.62
0.673	0.685	0.698	0.638	0.695	0.672	0.667	0.705	0.703	0.668	0.685	0.704	0.694	0.739	0.747	0.704	0.696	0.698	0.671	0.741	0.763	0.692	0.7	0.727	0.518	0.392	0.491	0.412	0.413	0.36	0.671	0.783	0.621	0.67	0.771	0.659	0.528	0.413	0.407	0.468	0.414	0.347	0.692	0.725	0.766	0.609	0.661	0.744	0.656	0.626
0.674	0.686	0.697	0.638	0.695	0.675	0.654	0.704	0.703	0.671	0.685	0.705	0.698	0.738	0.747	0.701	0.701	0.697	0.67	0.744	0.764	0.69	0.698	0.728	0.527	0.397	0.499	0.417	0.419	0.368	0.672	0.785	0.624	0.668	0.773	0.658	0.532	0.416	0.413	0.48	0.42	0.35	0.69	0.727	0.765	0.608	0.675	0.744	0.658	0.641
0.674	0.683	0.702	0.64	0.691	0.674	0.663	0.702	0.702	0.667	0.684	0.702	0.698	0.735	0.747	0.702	0.7	0.697	0.675	0.744	0.763	0.692	0.699	0.729	0.535	0.398	0.505	0.421	0.423	0.368	0.681	0.783	0.624	0.668	0.773	0.66	0.544	0.419	0.416	0.483	0.428	0.352	0.693	0.726	0.762	0.611	0.68	0.745	0.656	0.653
0.672	0.681	0.704	0.636	0.691	0.675	0.665	0.701	0.702	0.665	0.684	0.697	0.695	0.735	0.747	0.7	0.699	0.698	0.671	0.746	0.764	0.69	0.701	0.73	0.548	0.405	0.518	0.422	0.429	0.371	0.674	0.783	0.63	0.675	0.772	0.66	0.559	0.424	0.422	0.492	0.433	0.355	0.693	0.728	0.764	0.617	0.684	0.745	0.656	0.667
0.67	0.68	0.698	0.637	0.691	0.674	0.669	0.704	0.702	0.666	0.684	0.702	0.698	0.736	0.75	0.701	0.701	0.696	0.67	0.75	0.765	0.69	0.701	0.73	0.565	0.411	0.542	0.432	0.434	0.377	0.677	0.785	0.635	0.676	0.772	0.658	0.577	0.43	0.431	0.505	0.442	0.358	0.694	0.728	0.764	0.62	0.688	0.745	0.663	0.689
0.667	0.679	0.695	0.638	0.687	0.673	0.666	0.7	0.699	0.665	0.683	0.705	0.696	0.733	0.747	0.702	0.7	0.697	0.673	0.747	0.764	0.689	0.704	0.731	0.574	0.416	0.543	0.433	0.438	0.379	0.68	0.78	0.635	0.68	0.774	0.659	0.582	0.434	0.437	0.512	0.444	0.362	0.695	0.73	0.763	0.623	0.694	0.746	0.662	0.689
0.674	0.677	0.696	0.641	0.689	0.672	0.663	0.698	0.701	0.669	0.683	0.701	0.693	0.732	0.747	0.7	0.699	0.697	0.672	0.748	0.762	0.688	0.706	0.73	0.582	0.416	0.552	0.436	0.442	0.381	0.689	0.781	0.636	0.681	0.772	0.658	0.594	0.439	0.449	0.52	0.451	0.365	0.697	0.729	0.76	0.626	0.695	0.744	0.667	0.699
0.675	0.675	0.696	0.638	0.687	0.67	0.661	0.695	0.698	0.665	0.68	0.705	0.696	0.73	0.746	0.701	0.7	0.696	0.672	0.747	0.763	0.69	0.709	0.732	0.591	0.423	0.56	0.439	0.446	0.383	0.688	0.782	0.639	0.687	0.772	0.659	0.604	0.443	0.452	0.528	0.453	0.369	0.697	0.727	0.762	0.63	0.704	0.743	0.668	0.706
0.673	0.673	0.699	0.637	0.686	0.674	0.661	0.698	0.699	0.664	0.681	0.703	0.698	0.728	0.744	0.696	0.699	0.695	0.67	0.75	0.761	0.688	0.708	0.732	0.603	0.431	0.57	0.443	0.455	0.391	0.692	0.784	0.643	0.686	0.774	0.659	0.617	0.449	0.46	0.538	0.46	0.374	0.691	0.727	0.761	0.63	0.706	0.745	0.669	0.724
0.674	0.674	0.695	0.639	0.682	0.676	0.663	0.697	0.702	0.67	0.68	0.706	0.692	0.727	0.744	0.694	0.7	0.694	0.668	0.749	0.76	0.685	0.708	0.732	0.61	0.433	0.584	0.455	0.46	0.399	0.69	0.787	0.644	0.692	0.771	0.658	0.627	0.455	0.472	0.545	0.462	0.377	0.695	0.726	0.761	0.635	0.707	0.744	0.672	0.744
0.676	0.674	0.7	0.641	0.683	0.677	0.665	0.697	0.701	0.669	0.679	0.701	0.696	0.729	0.744	0.694	0.702	0.692	0.674	0.748	0.76	0.688	0.71	0.733	0.615	0.439	0.595	0.46	0.465	0.402	0.69	0.786	0.642	0.692	0.77	0.659	0.637	0.461	0.478	0.549	0.47	0.382	0.691	0.728	0.759	0.633	0.712	0.743	0.671	0.747
0.678	0.675	0.701	0.64	0.682	0.672	0.668	0.696	0.699	0.665	0.677	0.7	0.695	0.728	0.744	0.699	0.7	0.69	0.668	0.746	0.76	0.69	0.707	0.731	0.63	0.445	0.607	0.462	0.465	0.403	0.688	0.786	0.648	0.695	0.769	0.657	0.642	0.467	0.486	0.558	0.478	0.388	0.691	0.726	0.761	0.635	0.714	0.743	0.671	0.747
0.676	0.676	0.702	0.641	0.683	0.674	0.668	0.696	0.7	0.666	0.676	0.696	0.7	0.729	0.742	0.699	0.698	0.687	0.672	0.748	0.761	0.689	0.707	0.73	0.638	0.451	0.612	0.469	0.473	0.408	0.69	0.788	0.643	0.693	0.769	0.657	0.66	0.474	0.491	0.568	0.499	0.391	0.691	0.724	0.762	0.638	0.718	0.741	0.669	0.748
0.678	0.676	0.699	0.643	0.679	0.672	0.669	0.692	0.697	0.666	0.679	0.701	0.694	0.727	0.742	0.701	0.699	0.685	0.674	0.746	0.76	0.687	0.708	0.731	0.654	0.456	0.614	0.474	0.477	0.413	0.69	0.786	0.647	0.697	0.768	0.654	0.659	0.478	0.497	0.574	0.5	0.395	0.691	0.721	0.759	0.638	0.722	0.742	0.67	0.749
0.676	0.671	0.698	0.64	0.678	0.671	0.662	0.689	0.696	0.664	0.678	0.696	0.69	0.722	0.739	0.696	0.697	0.683	0.671	0.745	0.759	0.684	0.707	0.732	0.658	0.466	0.621	0.479	0.48	0.422	0.688	0.786	0.645	0.693	0.767	0.65	0.668	0.484	0.515	0.583	0.508	0.397	0.688	0.722	0.755	0.639	0.721	0.742	0.671	0.752
0.678	0.67	0.698	0.64	0.678	0.67	0.658	0.689	0.7	0.664	0.675	0.694	0.692	0.721	0.74	0.698	0.699	0.682	0.664	0.745	0.758	0.684	0.706	0.732	0.674	0.473	0.632	0.487	0.495	0.429	0.692	0.786	0.648	0.697	0.766	0.651	0.672	0.493	0.529	0.588	0.519	0.404	0.688	0.723	0.754	0.64	0.721	0.74	0.669	0.754
0.677	0.673	0.698	0.64	0.676	0.668	0.657	0.688	0.696	0.668	0.675	0.694	0.691	0.722	0.74	0.699	0.7	0.684	0.668	0.743	0.756	0.684	0.706	0.732	0.691	0.483	0.645	0.492	0.507	0.436	0.685	0.785	0.649	0.695	0.763	0.65	0.681	0.503	0.542	0.593	0.528	0.413	0.688	0.72	0.757	0.641	0.724	0.739	0.672	0.753
0.674	0.675	0.696	0.639	0.673	0.665	0.661	0.687	0.695	0.666	0.672	0.695	0.686	0.717	0.739	0.7	0.697	0.685	0.665	0.739	0.753	0.685	0.704	0.732	0.672	0.488	0.656	0.491	0.516	0.438	0.689	0.784	0.649	0.698	0.76	0.65	0.697	0.507	0.548	0.598	0.542	0.418	0.687	0.724	0.757	0.642	0.723	0.738	0.672	0.754
0.672	0.673	0.696	0.639	0.673	0.665	0.665	0.681	0.692	0.664	0.672	0.695	0.692	0.718	0.739	0.701	0.698	0.686	0.66	0.738	0.754	0.683	0.704	0.732	0.693	0.497	0.658	0.494	0.522	0.442	0.689	0.781	0.65	0.697	0.759	0.652	0.689	0.511	0.557	0.605	0.54	0.42	0.687	0.717	0.757	0.642	0.725	0.737	0.668	0.754
0.672	0.675	0.695	0.64	0.672	0.667	0.664	0.683	0.694	0.664	0.672	0.696	0.691	0.716	0.739	0.704	0.694	0.686	0.661	0.739	0.755	0.681	0.702	0.732	0.669	0.498	0.67	0.501	0.531	0.449	0.687	0.782	0.653	0.689	0.759	0.652	0.689	0.517	0.571	0.61	0.551	0.43	0.687	0.716	0.756	0.643	0.723	0.736	0.672	0.755
0.672	0.674	0.698	0.638	0.672	0.67	0.666	0.684	0.695	0.661	0.674	0.696	0.692	0.72	0.742	0.704	0.699	0.681	0.663	0.741	0.757	0.686	0.701	0.729	0.683	0.508	0.673	0.513	0.544	0.453	0.68	0.78	0.655	0.696	0.758	0.651	0.681	0.522	0.58	0.614	0.554	0.437	0.687	0.721	0.755	0.645	0.727	0.736	0.669	0.757
0.673	0.671	0.699	0.638	0.674	0.669	0.663	0.683	0.693	0.662	0.675	0.69	0.696	0.717	0.735	0.698	0.7	0.68	0.671	0.738	0.759	0.687	0.701	0.729	0.686	0.508	0.676	0.519	0.552	0.459	0.686	0.778	0.654	0.696	0.757	0.648	0.674	0.529	0.592	0.619	0.56	0.442	0.689	0.717	0.752	0.646	0.728	0.737	0.669	0.757
0.674	0.671	0.701	0.637	0.671	0.669	0.665	0.678	0.691	0.663	0.673	0.69	0.691	0.715	0.733	0.693	0.699	0.68	0.67	0.735	0.754	0.683	0.702	0.728	0.686	0.513	0.68	0.524	0.559	0.463	0.68	0.776	0.655	0.694	0.754	0.646	0.698	0.533	0.604	0.628	0.569	0.449	0.684	0.72	0.75	0.647	0.73	0.734	0.667	0.756
0.674	0.667	0.696	0.638	0.671	0.666	0.663	0.675	0.689	0.662	0.671	0.689	0.683	0.717	0.734	0.689	0.697	0.682	0.676	0.734	0.754	0.682	0.702	0.729	0.679	0.519	0.692	0.533	0.572	0.471	0.679	0.776	0.655	0.693	0.754	0.654	0.698	0.541	0.612	0.628	0.583	0.456	0.681	0.716	0.75	0.649	0.73	0.735	0.662	0.757
0.674	0.663	0.698	0.639	0.668	0.662	0.661	0.679	0.69	0.661	0.669	0.689	0.683	0.717	0.736	0.689	0.698	0.682	0.672	0.733	0.754	0.687	0.699	0.729	0.679	0.524	0.699	0.542	0.584	0.478	0.681	0.772	0.654	0.694	0.751	0.655	0.696	0.547	0.625	0.625	0.588	0.461	0.685	0.717	0.746	0.65	0.732	0.734	0.663	0.756
0.676	0.664	0.698	0.639	0.669	0.664	0.658	0.677	0.691	0.661	0.672	0.684	0.686	0.716	0.733	0.689	0.699	0.681	0.671	0.73	0.753	0.681	0.698	0.728	0.689	0.532	0.708	0.55	0.594	0.479	0.681	0.771	0.654	0.694	0.751	0.652	0.699	0.555	0.632	0.628	0.598	0.475	0.683	0.715	0.744	0.651	0.733	0.734	0.66	0.756
0.674	0.663	0.699	0.638	0.669	0.664	0.656	0.679	0.693	0.661	0.667	0.684	0.69	0.714	0.734	0.693	0.697	0.68	0.671	0.728	0.755	0.684	0.696	0.726	0.69	0.537	0.719	0.561	0.601	0.487	0.678	0.769	0.653	0.696	0.747	0.65	0.703	0.565	0.638	0.636	0.599	0.477	0.684	0.715	0.745	0.649	0.732	0.732	0.658	0.756
0.673	0.664	0.698	0.639	0.668	0.663	0.661	0.671	0.695	0.661	0.666	0.689	0.685	0.713	0.73	0.697	0.696	0.679	0.67	0.729	0.755	0.683	0.696	0.726	0.685	0.54	0.725	0.565	0.607	0.496	0.674	0.766	0.658	0.693	0.747	0.65	0.701	0.572	0.644	0.631	0.601	0.473	0.681	0.713	0.744	0.648	0.731	0.728	0.66	0.754
0.674	0.665	0.7	0.64	0.667	0.664	0.663	0.67	0.692	0.663	0.663	0.684	0.682	0.708	0.729	0.696	0.696	0.677	0.67	0.727	0.752	0.681	0.698	0.722	0.682	0.546	0.729	0.576	0.613	0.498	0.677	0.762	0.661	0.693	0.745	0.651	0.702	0.578	0.655	0.631	0.606	0.482	0.679	0.711	0.741	0.649	0.73	0.732	0.658	0.752
0.673	0.663	0.698	0.639	0.663	0.662	0.667	0.671	0.695	0.664	0.664	0.683	0.682	0.709	0.727	0.69	0.696	0.678	0.669	0.727	0.752	0.683	0.696	0.718	0.685	0.55	0.734	0.578	0.621	0.513	0.677	0.762	0.661	0.694	0.742	0.653	0.706	0.583	0.664	0.636	0.61	0.489	0.68	0.706	0.739	0.651	0.729	0.729	0.66	0.752
0.672	0.665	0.698	0.641	0.665	0.662	0.665	0.68	0.698	0.665	0.668	0.682	0.69	0.709	0.733	0.692	0.693	0.679	0.667	0.727	0.752	0.683	0.694	0.718	0.686	0.555	0.739	0.586	0.629	0.526	0.678	0.761	0.658	0.695	0.746	0.655	0.709	0.592	0.669	0.64	0.613	0.496	0.681	0.709	0.74	0.652	0.73	0.726	0.661	0.753
0.672	0.665	0.698	0.641	0.664	0.661	0.668	0.668	0.695	0.665	0.664	0.683	0.692	0.709	0.734	0.689	0.696	0.68	0.665	0.726	0.752	0.679	0.694	0.719	0.685	0.561	0.744	0.594	0.637	0.529	0.684	0.76	0.652	0.694	0.744	0.652	0.711	0.599	0.676	0.642	0.616	0.508	0.68	0.712	0.742	0.65	0.73	0.728	0.662	0.75
0.675	0.668	0.7	0.642	0.665	0.664	0.669	0.675	0.692	0.666	0.665	0.687	0.69	0.71	0.731	0.691	0.696	0.682	0.668	0.725	0.751	0.682	0.692	0.715	0.694	0.569	0.741	0.597	0.64	0.533	0.682	0.756	0.657	0.696	0.741	0.647	0.71	0.609	0.681	0.645	0.622	0.513	0.679	0.71	0.745	0.649	0.731	0.728	0.66	0.75
0.674	0.664	0.699	0.642	0.665	0.66	0.667	0.669	0.69	0.666	0.661	0.685	0.685	0.702	0.728	0.684	0.691	0.683	0.667	0.726	0.749	0.681	0.691	0.715	0.699	0.574	0.742	0.603	0.646	0.54	0.676	0.754	0.657	0.692	0.74	0.652	0.709	0.615	0.687	0.649	0.625	0.521	0.678	0.702	0.74	0.649	0.731	0.729	0.66	0.748
0.673	0.665	0.7	0.642	0.666	0.661	0.669	0.67	0.693	0.666	0.667	0.685	0.686	0.705	0.729	0.683	0.691	0.678	0.665	0.723	0.751	0.685	0.693	0.713	0.692	0.578	0.745	0.617	0.654	0.545	0.673	0.753	0.661	0.69	0.741	0.655	0.709	0.622	0.694	0.652	0.635	0.529	0.679	0.704	0.735	0.651	0.731	0.729	0.658	0.746
0.673	0.666	0.702	0.644	0.665	0.661	0.668	0.671	0.696	0.667	0.663	0.686	0.686	0.702	0.724	0.685	0.692	0.678	0.668	0.722	0.754	0.68	0.693	0.716	0.698	0.583	0.753	0.617	0.658	0.557	0.673	0.753	0.663	0.693	0.736	0.656	0.713	0.625	0.7	0.654	0.635	0.538	0.676	0.707	0.734	0.651	0.732	0.729	0.658	0.746
0.675	0.665	0.701	0.644	0.663	0.662	0.664	0.673	0.693	0.668	0.662	0.682	0.688	0.705	0.727	0.69	0.692	0.677	0.672	0.724	0.752	0.679	0.692	0.716	0.697	0.59	0.754	0.625	0.663	0.567	0.675	0.75	0.658	0.689	0.734	0.654	0.714	0.631	0.704	0.654	0.637	0.543	0.679	0.702	0.733	0.648	0.733	0.729	0.661	0.743
0.676	0.666	0.702	0.645	0.663	0.662	0.663	0.669	0.691	0.669	0.661	0.684	0.684	0.705	0.726	0.694	0.691	0.678	0.668	0.722	0.751	0.679	0.687	0.714	0.696	0.593	0.758	0.631	0.668	0.572	0.673	0.747	0.662	0.689	0.736	0.65	0.718	0.636	0.709	0.654	0.638	0.549	0.678	0.696	0.733	0.648	0.729	0.73	0.662	0.74
0.675	0.666	0.703	0.646	0.665	0.663	0.664	0.669	0.691	0.67	0.661	0.684	0.679	0.701	0.725	0.694	0.685	0.682	0.665	0.721	0.75	0.675	0.689	0.714	0.687	0.599	0.759	0.633	0.672	0.578	0.677	0.744	0.663	0.689	0.734	0.651	0.715	0.643	0.719	0.655	0.647	0.556	0.677	0.699	0.734	0.648	0.73	0.729	0.659	0.739
0.674	0.667	0.704	0.648	0.665	0.664	0.665	0.67	0.692	0.673	0.659	0.687	0.683	0.701	0.728	0.686	0.688	0.684	0.665	0.723	0.751	0.677	0.686	0.711	0.689	0.601	0.76	0.636	0.678	0.586	0.68	0.741	0.662	0.692	0.731	0.651	0.712	0.649	0.722	0.658	0.65	0.562	0.678	0.701	0.735	0.648	0.732	0.729	0.661	0.735
0.674	0.669	0.705	0.65	0.664	0.665	0.664	0.672	0.693	0.674	0.656	0.684	0.688	0.701	0.725	0.687	0.688	0.681	0.664	0.722	0.753	0.675	0.685	0.712	0.691	0.607	0.763	0.644	0.68	0.591	0.676	0.744	0.663	0.691	0.732	0.654	0.712	0.655	0.727	0.659	0.653	0.567	0.677	0.695	0.732	0.648	0.729	0.728	0.66	0.735
0.677	0.668	0.705	0.651	0.665	0.666	0.664	0.672	0.695	0.676	0.657	0.687	0.687	0.702	0.724	0.686	0.689	0.677	0.665	0.725	0.753	0.676	0.685	0.715	0.694	0.612	0.766	0.648	0.683	0.598	0.674	0.745	0.663	0.687	0.734	0.657	0.711	0.666	0.733	0.66	0.661	0.574	0.679	0.699	0.73	0.648	0.73	0.727	0.663	0.732
0.677	0.67	0.708	0.652	0.666	0.668	0.664	0.674	0.696	0.677	0.657	0.685	0.688	0.699	0.722	0.686	0.689	0.679	0.665	0.723	0.754	0.677	0.683	0.714	0.694	0.616	0.767	0.655	0.687	0.603	0.674	0.745	0.661	0.686	0.734	0.656	0.713	0.672	0.736	0.661	0.664	0.58	0.68	0.697	0.73	0.649	0.728	0.728	0.661	0.735
0.678	0.671	0.709	0.651	0.668	0.668	0.666	0.673	0.697	0.677	0.659	0.687	0.686	0.702	0.728	0.682	0.683	0.679	0.666	0.725	0.753	0.677	0.681	0.713	0.692	0.621	0.771	0.649	0.69	0.611	0.675	0.743	0.663	0.685	0.732	0.655	0.712	0.675	0.741	0.666	0.668	0.588	0.681	0.696	0.732	0.646	0.725	0.729	0.66	0.736
0.676	0.671	0.708	0.653	0.668	0.669	0.667	0.675	0.7	0.677	0.66	0.685	0.689	0.703	0.724	0.683	0.686	0.682	0.662	0.721	0.753	0.679	0.68	0.715	0.687	0.629	0.771	0.655	0.693	0.616	0.672	0.744	0.666	0.685	0.729	0.649	0.712	0.685	0.744	0.667	0.67	0.59	0.681	0.696	0.728	0.647	0.725	0.73	0.66	0.734
0.677	0.671	0.706	0.654	0.671	0.67	0.672	0.681	0.699	0.678	0.661	0.687	0.684	0.7	0.726	0.685	0.686	0.684	0.665	0.72	0.754	0.681	0.681	0.716	0.688	0.636	0.771	0.66	0.693	0.619	0.673	0.742	0.663	0.687	0.728	0.652	0.713	0.684	0.741	0.67	0.674	0.595	0.682	0.697	0.724	0.646	0.728	0.73	0.663	0.735
0.679	0.672	0.708	0.655	0.672	0.671	0.673	0.684	0.702	0.679	0.662	0.687	0.687	0.7	0.726	0.686	0.684	0.683	0.666	0.724	0.755	0.673	0.68	0.716	0.687	0.64	0.773	0.653	0.692	0.626	0.672	0.744	0.662	0.688	0.729	0.656	0.714	0.687	0.743	0.67	0.678	0.6	0.679	0.695	0.727	0.646	0.728	0.731	0.66	0.734
0.679	0.67	0.707	0.656	0.672	0.672	0.674	0.682	0.701	0.68	0.664	0.688	0.688	0.701	0.727	0.687	0.686	0.683	0.671	0.726	0.756	0.672	0.681	0.716	0.687	0.647	0.775	0.654	0.696	0.63	0.672	0.742	0.663	0.685	0.732	0.655	0.709	0.69	0.747	0.671	0.681	0.604	0.68	0.696	0.727	0.649	0.728	0.732	0.658	0.729
0.68	0.67	0.71	0.657	0.671	0.672	0.675	0.68	0.703	0.681	0.665	0.689	0.689	0.702	0.727	0.69	0.686	0.683	0.668	0.726	0.756	0.671	0.678	0.716	0.689	0.653	0.776	0.662	0.695	0.636	0.671	0.741	0.663	0.684	0.732	0.657	0.71	0.694	0.748	0.672	0.686	0.608	0.678	0.696	0.726	0.646	0.732	0.731	0.658	0.724
0.681	0.67	0.709	0.658	0.675	0.672	0.676	0.678	0.705	0.683	0.666	0.688	0.679	0.705	0.728	0.689	0.688	0.681	0.667	0.726	0.756	0.675	0.68	0.72	0.69	0.657	0.776	0.665	0.696	0.639	0.67	0.743	0.664	0.686	0.731	0.659	0.71	0.698	0.748	0.671	0.687	0.613	0.676	0.694	0.725	0.646	0.732	0.731	0.66	0.726
0.681	0.669	0.71	0.658	0.672	0.674	0.677	0.678	0.706	0.683	0.666	0.69	0.681	0.704	0.729	0.689	0.687	0.686	0.668	0.727	0.756	0.679	0.679	0.72	0.689	0.661	0.775	0.664	0.696	0.642	0.665	0.742	0.662	0.687	0.728	0.657	0.706	0.703	0.749	0.672	0.689	0.616	0.677	0.695	0.726	0.646	0.733	0.732	0.66	0.722
0.681	0.669	0.709	0.658	0.672	0.673	0.678	0.679	0.708	0.684	0.668	0.69	0.678	0.704	0.729	0.691	0.687	0.686	0.669	0.727	0.756	0.679	0.68	0.722	0.688	0.665	0.776	0.666	0.698	0.645	0.668	0.741	0.663	0.686	0.727	0.656	0.708	0.708	0.75	0.671	0.691	0.619	0.679	0.697	0.727	0.645	0.735	0.732	0.661	0.724
0.682	0.67	0.71	0.659	0.673	0.674	0.678	0.682	0.71	0.684	0.67	0.69	0.678	0.706	0.73	0.693	0.687	0.686	0.671	0.729	0.756	0.68	0.678	0.724	0.688	0.667	0.779	0.665	0.701	0.651	0.669	0.739	0.662	0.686	0.73	0.656	0.709	0.71	0.751	0.673	0.693	0.622	0.682	0.694	0.727	0.647	0.735	0.732	0.66	0.721
0.681	0.672	0.709	0.657	0.674	0.673	0.676	0.68	0.708	0.685	0.668	0.69	0.681	0.704	0.729	0.693	0.685	0.689	0.672	0.729	0.757	0.679	0.681	0.725	0.685	0.664	0.781	0.667	0.704	0.671	0.668	0.738	0.662	0.687	0.727	0.657	0.709	0.711	0.762	0.675	0.693	0.624	0.682	0.693	0.73	0.646	0.736	0.732	0.659	0.72
0.682	0.674	0.71	0.657	0.678	0.675	0.677	0.683	0.711	0.686	0.672	0.691	0.681	0.707	0.73	0.693	0.689	0.687	0.674	0.732	0.758	0.678	0.681	0.726	0.69	0.674	0.784	0.673	0.703	0.658	0.673	0.74	0.661	0.685	0.729	0.663	0.703	0.716	0.757	0.674	0.698	0.631	0.687	0.695	0.725	0.647	0.737	0.734	0.661	0.723
0.682	0.674	0.711	0.657	0.682	0.674	0.677	0.684	0.714	0.686	0.67	0.691	0.679	0.703	0.733	0.695	0.689	0.689	0.675	0.728	0.761	0.68	0.684	0.723	0.69	0.675	0.781	0.672	0.706	0.663	0.675	0.739	0.664	0.685	0.731	0.665	0.703	0.715	0.752	0.676	0.696	0.633	0.689	0.694	0.729	0.648	0.735	0.736	0.661	0.724
0.682	0.674	0.711	0.658	0.683	0.675	0.677	0.685	0.714	0.687	0.673	0.691	0.68	0.703	0.734	0.692	0.689	0.69	0.673	0.729	0.76	0.681	0.684	0.719	0.688	0.679	0.781	0.67	0.703	0.666	0.674	0.739	0.663	0.685	0.729	0.666	0.697	0.716	0.752	0.677	0.699	0.633	0.69	0.694	0.729	0.647	0.737	0.738	0.663	0.718
0.681	0.675	0.711	0.658	0.684	0.676	0.677	0.686	0.715	0.688	0.675	0.693	0.681	0.706	0.734	0.694	0.688	0.689	0.673	0.731	0.76	0.681	0.683	0.723	0.69	0.679	0.78	0.668	0.705	0.672	0.673	0.741	0.664	0.686	0.727	0.664	0.704	0.716	0.752	0.677	0.7	0.635	0.691	0.696	0.729	0.651	0.737	0.737	0.663	0.718
0.681	0.675	0.711	0.658	0.684	0.676	0.678	0.687	0.715	0.687	0.677	0.693	0.686	0.706	0.736	0.695	0.687	0.691	0.675	0.731	0.761	0.682	0.685	0.725	0.69	0.682	0.781	0.673	0.702	0.674	0.674	0.738	0.664	0.686	0.729	0.666	0.709	0.716	0.754	0.678	0.699	0.635	0.691	0.698	0.728	0.653	0.737	0.738	0.665	0.718
0.681	0.675	0.712	0.658	0.684	0.677	0.678	0.689	0.718	0.688	0.676	0.693	0.678	0.707	0.736	0.695	0.687	0.692	0.677	0.734	0.762	0.683	0.682	0.728	0.696	0.682	0.783	0.676	0.703	0.679	0.675	0.736	0.663	0.686	0.727	0.665	0.71	0.716	0.754	0.678	0.702	0.638	0.692	0.698	0.728	0.653	0.735	0.738	0.664	0.721
0.681	0.675	0.712	0.658	0.683	0.677	0.679	0.688	0.718	0.688	0.677	0.691	0.685	0.708	0.736	0.697	0.69	0.691	0.679	0.736	0.762	0.685	0.68	0.73	0.691	0.683	0.783	0.673	0.701	0.685	0.673	0.737	0.664	0.687	0.728	0.662	0.713	0.717	0.758	0.678	0.704	0.64	0.693	0.699	0.728	0.652	0.737	0.738	0.665	0.717
0.681	0.676	0.713	0.657	0.682	0.679	0.68	0.689	0.718	0.688	0.677	0.693	0.69	0.71	0.735	0.698	0.692	0.693	0.68	0.736	0.761	0.685	0.683	0.732	0.69	0.684	0.784	0.672	0.702	0.682	0.673	0.738	0.663	0.687	0.729	0.664	0.709	0.719	0.758	0.677	0.705	0.64	0.696	0.7	0.731	0.653	0.735	0.737	0.664	0.716
0.681	0.675	0.712	0.657	0.683	0.678	0.68	0.689	0.718	0.689	0.679	0.693	0.694	0.709	0.737	0.699	0.69	0.694	0.682	0.734	0.761	0.684	0.685	0.731	0.696	0.685	0.783	0.678	0.704	0.679	0.673	0.738	0.665	0.688	0.73	0.664	0.711	0.72	0.76	0.679	0.706	0.643	0.698	0.701	0.727	0.655	0.737	0.738	0.664	0.716
0.682	0.675	0.714	0.657	0.686	0.678	0.68	0.688	0.72	0.69	0.68	0.694	0.697	0.711	0.737	0.7	0.691	0.694	0.684	0.732	0.762	0.683	0.684	0.732	0.696	0.693	0.782	0.674	0.704	0.682	0.675	0.737	0.665	0.689	0.731	0.667	0.713	0.724	0.759	0.682	0.706	0.646	0.699	0.702	0.727	0.653	0.741	0.737	0.664	0.715
0.683	0.676	0.715	0.658	0.686	0.677	0.68	0.69	0.722	0.69	0.679	0.693	0.698	0.712	0.738	0.7	0.694	0.694	0.683	0.735	0.762	0.683	0.685	0.731	0.683	0.689	0.779	0.671	0.702	0.688	0.677	0.739	0.664	0.688	0.73	0.67	0.711	0.722	0.76	0.68	0.706	0.648	0.699	0.705	0.731	0.655	0.739	0.74	0.666	0.715
0.684	0.676	0.714	0.657	0.686	0.678	0.681	0.691	0.722	0.69	0.681	0.693	0.698	0.712	0.74	0.7	0.694	0.694	0.683	0.737	0.763	0.683	0.689	0.733	0.683	0.685	0.779	0.672	0.706	0.692	0.678	0.739	0.665	0.69	0.731	0.669	0.703	0.718	0.76	0.68	0.711	0.654	0.7	0.703	0.729	0.658	0.741	0.741	0.666	0.714
0.685	0.676	0.716	0.658	0.686	0.681	0.682	0.692	0.724	0.689	0.684	0.695	0.698	0.713	0.739	0.701	0.692	0.693	0.684	0.737	0.764	0.683	0.688	0.739	0.688	0.684	0.781	0.671	0.7	0.689	0.68	0.741	0.664	0.688	0.733	0.673	0.7	0.718	0.761	0.679	0.711	0.655	0.698	0.706	0.73	0.657	0.743	0.74	0.665	0.714
0.684	0.677	0.716	0.657	0.686	0.682	0.682	0.692	0.722	0.69	0.683	0.694	0.697	0.713	0.739	0.701	0.695	0.696	0.684	0.737	0.763	0.685	0.692	0.739	0.695	0.68	0.783	0.672	0.696	0.69	0.682	0.741	0.663	0.69	0.734	0.673	0.696	0.718	0.765	0.679	0.71	0.652	0.699	0.706	0.731	0.659	0.745	0.74	0.666	0.718
0.685	0.676	0.716	0.657	0.686	0.682	0.683	0.691	0.723	0.69	0.685	0.695	0.696	0.714	0.74	0.701	0.695	0.696	0.684	0.737	0.764	0.685	0.695	0.738	0.693	0.681	0.784	0.673	0.7	0.69	0.682	0.743	0.664	0.69	0.735	0.674	0.694	0.721	0.767	0.678	0.709	0.655	0.7	0.708	0.728	0.659	0.747	0.741	0.667	0.72
0.685	0.677	0.718	0.658	0.687	0.681	0.682	0.692	0.724	0.689	0.687	0.696	0.696	0.715	0.741	0.701	0.698	0.695	0.684	0.737	0.764	0.687	0.696	0.738	0.695	0.682	0.78	0.671	0.703	0.693	0.683	0.745	0.664	0.691	0.736	0.671	0.7	0.719	0.768	0.678	0.712	0.657	0.7	0.709	0.728	0.66	0.745	0.742	0.669	0.714
0.686	0.677	0.718	0.658	0.687	0.682	0.684	0.692	0.725	0.69	0.687	0.697	0.697	0.716	0.741	0.702	0.699	0.696	0.685	0.739	0.765	0.687	0.695	0.735	0.699	0.684	0.786	0.676	0.702	0.696	0.684	0.747	0.664	0.693	0.735	0.671	0.706	0.72	0.767	0.681	0.712	0.658	0.701	0.709	0.728	0.66	0.747	0.743	0.67	0.717
0.686	0.677	0.718	0.657	0.686	0.683	0.682	0.693	0.726	0.69	0.685	0.696	0.699	0.716	0.74	0.701	0.698	0.695	0.684	0.739	0.766	0.686	0.693	0.733	0.696	0.684	0.783	0.672	0.699	0.695	0.686	0.747	0.665	0.69	0.737	0.671	0.706	0.719	0.769	0.68	0.71	0.66	0.701	0.71	0.728	0.658	0.747	0.742	0.67	0.715
0.686	0.678	0.719	0.657	0.686	0.684	0.686	0.693	0.727	0.691	0.686	0.695	0.7	0.716	0.74	0.702	0.7	0.695	0.685	0.74	0.765	0.686	0.696	0.732	0.693	0.684	0.782	0.67	0.702	0.691	0.687	0.746	0.665	0.692	0.739	0.676	0.709	0.72	0.765	0.681	0.71	0.662	0.701	0.71	0.729	0.658	0.749	0.742	0.671	0.716
0.687	0.68	0.722	0.657	0.687	0.684	0.688	0.694	0.73	0.691	0.687	0.698	0.7	0.719	0.743	0.701	0.701	0.693	0.685	0.743	0.767	0.685	0.697	0.735	0.695	0.685	0.784	0.671	0.693	0.698	0.689	0.748	0.667	0.694	0.739	0.673	0.707	0.719	0.768	0.682	0.71	0.663	0.7	0.712	0.729	0.658	0.749	0.745	0.671	0.716
0.689	0.68	0.721	0.658	0.686	0.684	0.689	0.695	0.73	0.692	0.688	0.697	0.7	0.719	0.742	0.702	0.702	0.7	0.684	0.744	0.768	0.685	0.698	0.74	0.695	0.684	0.786	0.673	0.694	0.699	0.69	0.749	0.667	0.697	0.74	0.672	0.705	0.72	0.768	0.681	0.71	0.663	0.7	0.711	0.73	0.659	0.751	0.745	0.671	0.719
0.689	0.68	0.721	0.658	0.686	0.684	0.689	0.695	0.727	0.691	0.687	0.697	0.699	0.718	0.742	0.701	0.703	0.696	0.684	0.744	0.767	0.686	0.697	0.735	0.694	0.686	0.788	0.67	0.698	0.7	0.689	0.749	0.667	0.697	0.742	0.673	0.703	0.72	0.767	0.682	0.71	0.664	0.701	0.713	0.73	0.659	0.751	0.743	0.67	0.719
0.69	0.681	0.722	0.658	0.688	0.685	0.692	0.697	0.729	0.693	0.689	0.699	0.699	0.718	0.743	0.701	0.704	0.697	0.684	0.744	0.768	0.686	0.697	0.735	0.695	0.684	0.787	0.674	0.697	0.696	0.689	0.749	0.666	0.697	0.742	0.673	0.702	0.721	0.773	0.682	0.713	0.667	0.701	0.712	0.73	0.659	0.75	0.745	0.672	0.719
0.69	0.682	0.723	0.658	0.69	0.688	0.692	0.696	0.73	0.693	0.689	0.698	0.701	0.719	0.742	0.702	0.705	0.697	0.682	0.745	0.768	0.685	0.697	0.735	0.693	0.683	0.783	0.678	0.694	0.697	0.689	0.75	0.668	0.7	0.743	0.673	0.7	0.72	0.774	0.681	0.712	0.663	0.702	0.715	0.729	0.661	0.751	0.743	0.673	0.72
0.691	0.683	0.725	0.657	0.69	0.687	0.692	0.696	0.73	0.693	0.69	0.701	0.701	0.72	0.743	0.703	0.706	0.697	0.682	0.746	0.769	0.686	0.696	0.732	0.693	0.686	0.788	0.675	0.696	0.7	0.689	0.753	0.669	0.699	0.743	0.673	0.701	0.719	0.773	0.681	0.714	0.668	0.702	0.715	0.73	0.66	0.753	0.746	0.674	0.72
0.692	0.683	0.726	0.657	0.689	0.687	0.693	0.697	0.73	0.692	0.689	0.7	0.701	0.72	0.744	0.704	0.705	0.695	0.682	0.746	0.769	0.685	0.696	0.732	0.692	0.684	0.79	0.673	0.702	0.701	0.689	0.752	0.669	0.7	0.743	0.677	0.704	0.715	0.774	0.681	0.717	0.668	0.701	0.714	0.73	0.66	0.754	0.747	0.674	0.721
0.692	0.684	0.724	0.659	0.689	0.689	0.694	0.698	0.733	0.692	0.691	0.702	0.7	0.72	0.744	0.703	0.706	0.697	0.681	0.747	0.769	0.685	0.696	0.731	0.691	0.684	0.79	0.677	0.7	0.698	0.688	0.754	0.669	0.699	0.744	0.672	0.707	0.717	0.778	0.681	0.717	0.666	0.7	0.715	0.729	0.66	0.754	0.75	0.673	0.722
0.693	0.684	0.725	0.659	0.689	0.69	0.694	0.698	0.734	0.693	0.691	0.699	0.7	0.721	0.743	0.703	0.705	0.697	0.681	0.746	0.769	0.686	0.696	0.732	0.692	0.687	0.791	0.678	0.695	0.698	0.689	0.756	0.672	0.701	0.746	0.673	0.709	0.72	0.781	0.68	0.718	0.671	0.7	0.716	0.73	0.66	0.755	0.749	0.674	0.724
0.695	0.686	0.728	0.659	0.689	0.689	0.696	0.699	0.735	0.694	0.694	0.701	0.7	0.721	0.744	0.703	0.705	0.696	0.681	0.746	0.77	0.685	0.695	0.736	0.696	0.69	0.791	0.678	0.696	0.7	0.69	0.757	0.671	0.701	0.745	0.673	0.71	0.722	0.781	0.682	0.718	0.669	0.699	0.719	0.731	0.66	0.755	0.749	0.674	0.725
0.695	0.687	0.728	0.66	0.691	0.69	0.696	0.7	0.735	0.694	0.693	0.704	0.699	0.723	0.745	0.703	0.705	0.696	0.681	0.748	0.771	0.686	0.696	0.734	0.697	0.693	0.795	0.678	0.699	0.7	0.691	0.758	0.671	0.702	0.745	0.676	0.712	0.723	0.783	0.681	0.718	0.671	0.699	0.718	0.734	0.66	0.757	0.747	0.674	0.729
0.696	0.688	0.729	0.66	0.691	0.691	0.697	0.701	0.736	0.695	0.692	0.704	0.7	0.721	0.745	0.703	0.704	0.698	0.681	0.747	0.771	0.686	0.696	0.734	0.699	0.692	0.79	0.676	0.698	0.7	0.691	0.761	0.672	0.702	0.745	0.674	0.71	0.722	0.785	0.682	0.719	0.669	0.698	0.717	0.731	0.661	0.756	0.749	0.673	0.73
0.696	0.689	0.731	0.659	0.69	0.692	0.697	0.703	0.738	0.695	0.695	0.705	0.7	0.722	0.746	0.705	0.704	0.697	0.68	0.748	0.772	0.688	0.696	0.734	0.702	0.692	0.793	0.678	0.695	0.701	0.691	0.762	0.671	0.702	0.746	0.673	0.708	0.724	0.787	0.682	0.719	0.673	0.699	0.717	0.733	0.66	0.755	0.748	0.673	0.733
0.695	0.69	0.73	0.66	0.691	0.694	0.698	0.703	0.734	0.696	0.695	0.705	0.699	0.723	0.748	0.704	0.703	0.699	0.68	0.75	0.772	0.686	0.696	0.734	0.704	0.691	0.792	0.677	0.698	0.7	0.689	0.761	0.672	0.703	0.746	0.679	0.707	0.721	0.786	0.683	0.718	0.671	0.698	0.719	0.735	0.66	0.755	0.75	0.672	0.731
0.697	0.691	0.731	0.661	0.692	0.695	0.699	0.703	0.737	0.698	0.696	0.707	0.7	0.725	0.746	0.705	0.703	0.7	0.679	0.749	0.773	0.687	0.697	0.735	0.705	0.692	0.798	0.678	0.697	0.703	0.689	0.762	0.674	0.704	0.746	0.677	0.704	0.721	0.789	0.685	0.719	0.673	0.698	0.719	0.733	0.662	0.756	0.749	0.672	0.733
0.698	0.692	0.732	0.662	0.691	0.696	0.699	0.703	0.74	0.698	0.698	0.709	0.7	0.726	0.747	0.706	0.704	0.7	0.68	0.749	0.773	0.689	0.697	0.738	0.704	0.693	0.796	0.68	0.699	0.704	0.689	0.761	0.675	0.703	0.75	0.679	0.71	0.722	0.788	0.686	0.718	0.67	0.698	0.718	0.732	0.661	0.757	0.751	0.672	0.732
0.701	0.693	0.732	0.661	0.692	0.695	0.7	0.704	0.742	0.697	0.699	0.707	0.701	0.726	0.748	0.707	0.705	0.698	0.68	0.75	0.774	0.69	0.698	0.734	0.703	0.693	0.8	0.68	0.699	0.704	0.688	0.762	0.675	0.704	0.747	0.676	0.712	0.722	0.79	0.689	0.722	0.671	0.696	0.719	0.731	0.661	0.757	0.751	0.671	0.733
0.701	0.694	0.734	0.661	0.693	0.696	0.7	0.704	0.737	0.699	0.697	0.708	0.702	0.725	0.748	0.706	0.704	0.699	0.68	0.751	0.773	0.689	0.697	0.736	0.702	0.693	0.798	0.68	0.699	0.704	0.689	0.764	0.676	0.704	0.748	0.678	0.716	0.723	0.792	0.687	0.722	0.672	0.696	0.719	0.732	0.662	0.757	0.751	0.671	0.734
0.701	0.695	0.734	0.662	0.694	0.697	0.701	0.706	0.743	0.699	0.7	0.709	0.702	0.726	0.748	0.707	0.705	0.699	0.68	0.751	0.774	0.69	0.697	0.739	0.701	0.696	0.806	0.68	0.701	0.704	0.689	0.765	0.677	0.705	0.749	0.681	0.717	0.724	0.798	0.688	0.723	0.673	0.695	0.72	0.733	0.663	0.758	0.75	0.671	0.734
0.701	0.697	0.735	0.662	0.696	0.697	0.701	0.707	0.742	0.701	0.697	0.71	0.703	0.728	0.748	0.707	0.705	0.699	0.682	0.751	0.776	0.69	0.698	0.74	0.702	0.696	0.809	0.68	0.701	0.704	0.688	0.765	0.677	0.704	0.749	0.683	0.717	0.729	0.799	0.688	0.725	0.673	0.694	0.72	0.733	0.663	0.759	0.754	0.672	0.735
0.702	0.698	0.735	0.663	0.696	0.699	0.7	0.707	0.742	0.702	0.699	0.709	0.704	0.728	0.749	0.706	0.706	0.701	0.682	0.752	0.776	0.69	0.698	0.737	0.704	0.703	0.807	0.682	0.701	0.705	0.689	0.766	0.677	0.705	0.749	0.675	0.717	0.726	0.797	0.689	0.726	0.674	0.696	0.722	0.735	0.663	0.759	0.755	0.672	0.737
0.702	0.698	0.735	0.663	0.696	0.699	0.704	0.709	0.744	0.702	0.701	0.712	0.705	0.729	0.75	0.707	0.706	0.702	0.682	0.752	0.776	0.691	0.698	0.736	0.707	0.702	0.806	0.681	0.702	0.711	0.689	0.766	0.677	0.705	0.749	0.681	0.718	0.726	0.799	0.686	0.725	0.675	0.696	0.723	0.736	0.663	0.76	0.752	0.672	0.738
0.703	0.699	0.736	0.664	0.695	0.698	0.704	0.709	0.743	0.703	0.702	0.712	0.705	0.73	0.75	0.708	0.706	0.702	0.682	0.751	0.775	0.691	0.698	0.735	0.708	0.704	0.81	0.68	0.704	0.705	0.689	0.765	0.679	0.705	0.75	0.682	0.715	0.728	0.802	0.685	0.726	0.676	0.697	0.724	0.734	0.663	0.759	0.752	0.672	0.739
0.703	0.699	0.738	0.665	0.697	0.7	0.704	0.71	0.746	0.704	0.702	0.714	0.706	0.731	0.751	0.709	0.707	0.703	0.682	0.752	0.776	0.692	0.7	0.735	0.709	0.709	0.813	0.682	0.706	0.704	0.689	0.766	0.681	0.705	0.75	0.677	0.715	0.728	0.804	0.686	0.729	0.675	0.698	0.726	0.735	0.664	0.76	0.753	0.672	0.741
0.704	0.701	0.738	0.665	0.697	0.701	0.706	0.711	0.747	0.705	0.702	0.716	0.707	0.732	0.752	0.709	0.708	0.703	0.683	0.753	0.777	0.693	0.698	0.737	0.71	0.71	0.815	0.682	0.705	0.707	0.688	0.765	0.68	0.705	0.75	0.676	0.713	0.728	0.802	0.688	0.729	0.677	0.699	0.726	0.736	0.665	0.759	0.755	0.672	0.744
0.704	0.701	0.739	0.666	0.697	0.702	0.706	0.711	0.746	0.705	0.702	0.713	0.707	0.732	0.753	0.711	0.707	0.702	0.684	0.753	0.778	0.695	0.7	0.739	0.71	0.708	0.815	0.682	0.703	0.71	0.689	0.765	0.681	0.706	0.75	0.677	0.716	0.728	0.804	0.69	0.73	0.677	0.697	0.726	0.736	0.665	0.758	0.753	0.672	0.744
0.706	0.702	0.74	0.666	0.698	0.703	0.707	0.712	0.747	0.707	0.703	0.717	0.709	0.734	0.754	0.712	0.709	0.701	0.685	0.754	0.779	0.696	0.7	0.738	0.71	0.709	0.816	0.685	0.706	0.711	0.688	0.764	0.681	0.707	0.75	0.679	0.716	0.731	0.81	0.691	0.73	0.679	0.697	0.727	0.737	0.666	0.759	0.755	0.672	0.745
0.707	0.702	0.74	0.668	0.699	0.704	0.71	0.713	0.748	0.707	0.704	0.717	0.711	0.734	0.754	0.712	0.709	0.703	0.685	0.755	0.778	0.694	0.701	0.738	0.708	0.711	0.817	0.686	0.707	0.716	0.688	0.764	0.681	0.706	0.753	0.68	0.716	0.733	0.81	0.694	0.731	0.678	0.697	0.728	0.735	0.666	0.76	0.758	0.672	0.744
0.708	0.705	0.741	0.668	0.701	0.706	0.711	0.713	0.749	0.707	0.705	0.719	0.713	0.735	0.753	0.713	0.71	0.704	0.686	0.756	0.777	0.696	0.701	0.739	0.703	0.713	0.818	0.681	0.707	0.708	0.689	0.765	0.681	0.707	0.753	0.676	0.717	0.73	0.811	0.694	0.729	0.68	0.696	0.727	0.739	0.667	0.761	0.759	0.671	0.745
0.708	0.706	0.741	0.669	0.702	0.706	0.712	0.714	0.75	0.709	0.707	0.719	0.712	0.735	0.754	0.714	0.711	0.704	0.686	0.756	0.779	0.697	0.703	0.739	0.703	0.715	0.823	0.684	0.708	0.71	0.689	0.765	0.683	0.707	0.754	0.682	0.718	0.73	0.81	0.695	0.729	0.681	0.697	0.729	0.741	0.667	0.761	0.758	0.671	0.744
0.709	0.706	0.742	0.669	0.702	0.706	0.714	0.714	0.749	0.71	0.709	0.721	0.713	0.737	0.755	0.714	0.711	0.702	0.687	0.756	0.779	0.697	0.703	0.739	0.702	0.715	0.822	0.683	0.711	0.715	0.69	0.766	0.683	0.708	0.754	0.681	0.719	0.731	0.809	0.696	0.727	0.681	0.698	0.73	0.741	0.667	0.762	0.76	0.671	0.745
0.71	0.708	0.743	0.671	0.703	0.707	0.714	0.716	0.752	0.711	0.711	0.719	0.714	0.738	0.756	0.715	0.711	0.703	0.687	0.757	0.779	0.696	0.704	0.74	0.703	0.715	0.822	0.684	0.714	0.715	0.691	0.768	0.685	0.707	0.754	0.678	0.719	0.733	0.812	0.696	0.731	0.68	0.698	0.729	0.74	0.668	0.762	0.761	0.671	0.745
0.71	0.709	0.744	0.672	0.704	0.708	0.714	0.718	0.753	0.712	0.711	0.72	0.714	0.738	0.756	0.716	0.711	0.707	0.686	0.758	0.781	0.698	0.705	0.739	0.701	0.717	0.821	0.687	0.715	0.713	0.691	0.768	0.684	0.709	0.755	0.681	0.72	0.738	0.817	0.695	0.732	0.683	0.7	0.731	0.744	0.669	0.763	0.761	0.671	0.743
0.712	0.71	0.745	0.672	0.705	0.709	0.715	0.719	0.752	0.712	0.713	0.723	0.715	0.74	0.757	0.717	0.713	0.706	0.686	0.759	0.78	0.7	0.706	0.74	0.702	0.716	0.827	0.689	0.715	0.714	0.692	0.768	0.686	0.708	0.757	0.679	0.718	0.742	0.819	0.694	0.733	0.686	0.7	0.731	0.742	0.67	0.763	0.762	0.67	0.743
0.712	0.712	0.745	0.673	0.705	0.711	0.716	0.719	0.753	0.712	0.714	0.724	0.716	0.74	0.757	0.718	0.713	0.707	0.687	0.759	0.782	0.701	0.706	0.74	0.702	0.72	0.825	0.688	0.715	0.715	0.691	0.766	0.687	0.71	0.756	0.686	0.715	0.744	0.816	0.693	0.735	0.685	0.699	0.732	0.743	0.67	0.764	0.763	0.671	0.743
0.712	0.713	0.746	0.674	0.706	0.71	0.718	0.72	0.753	0.713	0.714	0.724	0.716	0.742	0.759	0.719	0.714	0.707	0.688	0.76	0.783	0.702	0.706	0.741	0.702	0.721	0.825	0.688	0.716	0.717	0.691	0.768	0.688	0.711	0.758	0.683	0.716	0.744	0.814	0.695	0.735	0.685	0.699	0.732	0.744	0.67	0.764	0.762	0.67	0.744
0.714	0.715	0.747	0.676	0.707	0.712	0.719	0.721	0.753	0.714	0.716	0.724	0.716	0.744	0.759	0.72	0.715	0.708	0.69	0.76	0.783	0.702	0.707	0.743	0.704	0.722	0.826	0.691	0.718	0.719	0.691	0.768	0.687	0.711	0.761	0.684	0.716	0.742	0.816	0.695	0.736	0.689	0.699	0.735	0.745	0.671	0.765	0.763	0.671	0.746
0.715	0.716	0.749	0.676	0.708	0.713	0.72	0.723	0.753	0.714	0.715	0.727	0.717	0.744	0.759	0.721	0.715	0.71	0.691	0.761	0.782	0.703	0.708	0.744	0.705	0.719	0.828	0.691	0.719	0.722	0.691	0.769	0.689	0.712	0.76	0.687	0.716	0.744	0.816	0.696	0.738	0.688	0.701	0.736	0.746	0.672	0.764	0.765	0.671	0.747
0.715	0.717	0.75	0.678	0.709	0.713	0.722	0.723	0.754	0.716	0.717	0.727	0.716	0.746	0.76	0.723	0.716	0.708	0.692	0.763	0.785	0.704	0.71	0.748	0.707	0.719	0.831	0.691	0.72	0.721	0.692	0.77	0.689	0.713	0.761	0.688	0.715	0.746	0.82	0.698	0.737	0.69	0.702	0.736	0.747	0.673	0.765	0.766	0.672	0.748
0.716	0.719	0.751	0.679	0.71	0.714	0.723	0.724	0.755	0.716	0.719	0.727	0.718	0.746	0.761	0.724	0.717	0.711	0.694	0.763	0.785	0.705	0.711	0.744	0.708	0.725	0.831	0.692	0.721	0.72	0.693	0.771	0.689	0.714	0.761	0.689	0.715	0.747	0.822	0.701	0.737	0.692	0.701	0.736	0.747	0.673	0.766	0.765	0.672	0.747
0.717	0.72	0.752	0.68	0.711	0.715	0.722	0.726	0.755	0.717	0.719	0.728	0.719	0.748	0.762	0.727	0.718	0.713	0.695	0.765	0.786	0.706	0.711	0.747	0.708	0.728	0.829	0.691	0.721	0.721	0.695	0.773	0.691	0.715	0.761	0.682	0.714	0.749	0.824	0.701	0.736	0.696	0.703	0.738	0.748	0.673	0.767	0.766	0.672	0.745
0.718	0.722	0.753	0.681	0.712	0.716	0.722	0.728	0.757	0.718	0.721	0.729	0.721	0.749	0.764	0.728	0.719	0.711	0.696	0.766	0.787	0.707	0.712	0.746	0.709	0.73	0.835	0.693	0.722	0.732	0.695	0.773	0.692	0.716	0.76	0.687	0.714	0.75	0.824	0.702	0.736	0.69	0.704	0.738	0.749	0.675	0.767	0.766	0.673	0.747
0.72	0.723	0.755	0.682	0.713	0.717	0.724	0.729	0.756	0.72	0.72	0.731	0.724	0.75	0.765	0.728	0.72	0.714	0.697	0.767	0.789	0.709	0.713	0.746	0.709	0.732	0.835	0.694	0.723	0.73	0.695	0.774	0.692	0.716	0.761	0.686	0.713	0.75	0.826	0.701	0.736	0.687	0.705	0.74	0.749	0.676	0.769	0.768	0.674	0.752
0.722	0.723	0.756	0.683	0.713	0.718	0.725	0.73	0.758	0.72	0.72	0.73	0.724	0.75	0.764	0.73	0.721	0.714	0.698	0.769	0.789	0.71	0.714	0.746	0.709	0.731	0.836	0.695	0.721	0.725	0.696	0.774	0.693	0.718	0.764	0.687	0.715	0.75	0.825	0.7	0.736	0.689	0.705	0.741	0.752	0.676	0.769	0.769	0.675	0.75
0.722	0.725	0.757	0.684	0.714	0.719	0.725	0.732	0.755	0.72	0.721	0.732	0.725	0.751	0.767	0.731	0.722	0.715	0.698	0.769	0.79	0.712	0.715	0.748	0.708	0.729	0.835	0.696	0.723	0.718	0.699	0.776	0.693	0.718	0.764	0.686	0.718	0.751	0.828	0.698	0.738	0.691	0.707	0.743	0.751	0.677	0.769	0.77	0.676	0.749
0.724	0.726	0.758	0.686	0.716	0.721	0.726	0.733	0.759	0.72	0.72	0.733	0.726	0.751	0.767	0.732	0.722	0.716	0.698	0.771	0.791	0.713	0.715	0.747	0.709	0.731	0.837	0.696	0.725	0.72	0.701	0.776	0.692	0.719	0.765	0.688	0.716	0.746	0.828	0.698	0.74	0.687	0.708	0.743	0.753	0.678	0.769	0.772	0.676	0.751
0.725	0.727	0.759	0.687	0.717	0.721	0.726	0.735	0.759	0.721	0.723	0.733	0.728	0.753	0.767	0.734	0.724	0.716	0.697	0.771	0.79	0.714	0.717	0.746	0.709	0.732	0.838	0.696	0.725	0.724	0.702	0.778	0.694	0.72	0.764	0.693	0.716	0.748	0.828	0.699	0.741	0.691	0.709	0.743	0.754	0.679	0.771	0.772	0.676	0.751
0.727	0.728	0.76	0.688	0.718	0.721	0.726	0.736	0.762	0.723	0.723	0.733	0.73	0.754	0.768	0.734	0.724	0.717	0.698	0.772	0.791	0.715	0.718	0.747	0.708	0.724	0.837	0.699	0.725	0.728	0.702	0.779	0.695	0.721	0.767	0.694	0.717	0.748	0.828	0.701	0.74	0.69	0.71	0.745	0.754	0.681	0.771	0.772	0.677	0.751
0.729	0.729	0.761	0.688	0.72	0.722	0.726	0.737	0.76	0.724	0.724	0.735	0.731	0.755	0.769	0.735	0.726	0.718	0.698	0.772	0.793	0.715	0.72	0.747	0.708	0.731	0.836	0.7	0.725	0.724	0.704	0.779	0.696	0.721	0.766	0.687	0.716	0.75	0.829	0.702	0.742	0.693	0.71	0.745	0.757	0.681	0.771	0.773	0.677	0.752
0.731	0.73	0.763	0.69	0.721	0.722	0.729	0.739	0.762	0.726	0.725	0.737	0.732	0.757	0.771	0.737	0.727	0.718	0.698	0.774	0.793	0.717	0.721	0.754	0.708	0.736	0.837	0.701	0.723	0.724	0.704	0.781	0.697	0.723	0.767	0.693	0.717	0.751	0.832	0.703	0.743	0.695	0.711	0.747	0.758	0.684	0.773	0.773	0.678	0.752
0.732	0.731	0.765	0.69	0.722	0.724	0.729	0.74	0.762	0.727	0.726	0.738	0.733	0.758	0.77	0.739	0.728	0.718	0.698	0.774	0.793	0.719	0.722	0.752	0.71	0.737	0.838	0.701	0.725	0.724	0.706	0.781	0.698	0.723	0.767	0.692	0.717	0.752	0.829	0.703	0.742	0.693	0.71	0.747	0.758	0.683	0.773	0.776	0.679	0.752
0.733	0.733	0.766	0.692	0.723	0.726	0.732	0.74	0.764	0.727	0.728	0.738	0.733	0.76	0.771	0.739	0.729	0.719	0.698	0.774	0.793	0.72	0.722	0.748	0.71	0.741	0.839	0.701	0.725	0.731	0.705	0.782	0.699	0.723	0.768	0.697	0.717	0.753	0.832	0.705	0.744	0.695	0.709	0.746	0.758	0.683	0.775	0.777	0.68	0.753
0.734	0.734	0.765	0.693	0.725	0.727	0.734	0.741	0.765	0.73	0.73	0.738	0.735	0.762	0.773	0.74	0.731	0.72	0.7	0.776	0.794	0.722	0.723	0.75	0.711	0.74	0.84	0.703	0.725	0.73	0.707	0.782	0.701	0.725	0.772	0.695	0.718	0.751	0.833	0.706	0.742	0.7	0.711	0.747	0.761	0.684	0.775	0.779	0.68	0.752
0.735	0.736	0.766	0.694	0.726	0.728	0.735	0.742	0.766	0.731	0.731	0.74	0.736	0.763	0.774	0.74	0.731	0.721	0.703	0.778	0.796	0.722	0.725	0.753	0.713	0.741	0.842	0.702	0.725	0.731	0.707	0.784	0.702	0.726	0.772	0.687	0.718	0.752	0.835	0.707	0.74	0.703	0.712	0.748	0.763	0.685	0.776	0.779	0.681	0.757
0.735	0.738	0.769	0.696	0.726	0.727	0.736	0.743	0.768	0.732	0.732	0.74	0.737	0.763	0.776	0.741	0.732	0.722	0.705	0.778	0.797	0.725	0.726	0.753	0.714	0.74	0.841	0.702	0.727	0.722	0.708	0.784	0.702	0.726	0.772	0.698	0.719	0.754	0.835	0.706	0.742	0.699	0.714	0.749	0.763	0.687	0.778	0.781	0.682	0.755
0.736	0.741	0.77	0.696	0.728	0.729	0.737	0.744	0.77	0.733	0.734	0.741	0.737	0.765	0.778	0.742	0.733	0.722	0.706	0.779	0.798	0.726	0.727	0.755	0.714	0.743	0.842	0.702	0.727	0.734	0.709	0.785	0.702	0.727	0.774	0.697	0.721	0.754	0.837	0.707	0.742	0.696	0.714	0.751	0.765	0.688	0.778	0.783	0.683	0.756
0.737	0.742	0.771	0.697	0.729	0.73	0.738	0.745	0.771	0.734	0.735	0.743	0.737	0.766	0.777	0.743	0.734	0.723	0.709	0.78	0.799	0.728	0.728	0.756	0.714	0.743	0.842	0.701	0.728	0.736	0.709	0.785	0.703	0.729	0.776	0.697	0.722	0.753	0.836	0.708	0.742	0.695	0.714	0.752	0.764	0.69	0.779	0.784	0.684	0.758
0.738	0.744	0.772	0.698	0.73	0.732	0.739	0.747	0.771	0.735	0.736	0.745	0.738	0.768	0.778	0.745	0.736	0.723	0.71	0.782	0.8	0.729	0.73	0.756	0.715	0.745	0.843	0.701	0.728	0.727	0.711	0.786	0.704	0.729	0.776	0.696	0.723	0.756	0.837	0.708	0.742	0.699	0.716	0.755	0.766	0.691	0.78	0.784	0.686	0.758
0.738	0.745	0.772	0.699	0.731	0.732	0.74	0.748	0.772	0.736	0.739	0.745	0.74	0.769	0.779	0.747	0.737	0.724	0.711	0.783	0.801	0.73	0.73	0.759	0.715	0.745	0.844	0.702	0.727	0.723	0.713	0.787	0.706	0.73	0.778	0.7	0.724	0.756	0.839	0.707	0.743	0.698	0.715	0.757	0.767	0.692	0.781	0.786	0.687	0.758
0.74	0.747	0.775	0.7	0.732	0.732	0.742	0.751	0.773	0.738	0.738	0.746	0.741	0.77	0.781	0.747	0.738	0.724	0.711	0.784	0.801	0.731	0.732	0.758	0.715	0.744	0.845	0.702	0.728	0.729	0.715	0.789	0.707	0.732	0.779	0.701	0.725	0.755	0.836	0.709	0.744	0.697	0.717	0.758	0.767	0.692	0.782	0.787	0.688	0.758
0.741	0.748	0.775	0.702	0.733	0.732	0.744	0.752	0.773	0.739	0.74	0.747	0.743	0.773	0.781	0.749	0.739	0.726	0.713	0.786	0.802	0.731	0.733	0.761	0.715	0.744	0.844	0.703	0.727	0.725	0.715	0.791	0.707	0.734	0.778	0.699	0.727	0.755	0.839	0.708	0.744	0.698	0.718	0.759	0.769	0.693	0.783	0.788	0.688	0.759
0.742	0.75	0.776	0.703	0.734	0.735	0.746	0.754	0.774	0.741	0.741	0.748	0.744	0.773	0.782	0.75	0.739	0.727	0.714	0.788	0.804	0.732	0.735	0.763	0.716	0.743	0.845	0.704	0.726	0.728	0.716	0.792	0.708	0.734	0.78	0.695	0.727	0.757	0.839	0.707	0.744	0.7	0.72	0.761	0.769	0.694	0.784	0.788	0.69	0.759
0.744	0.751	0.777	0.704	0.736	0.737	0.747	0.755	0.774	0.742	0.742	0.748	0.746	0.774	0.784	0.751	0.741	0.727	0.713	0.788	0.804	0.735	0.736	0.761	0.716	0.745	0.845	0.703	0.727	0.729	0.717	0.793	0.708	0.735	0.782	0.702	0.729	0.757	0.839	0.708	0.743	0.7	0.722	0.762	0.771	0.695	0.786	0.789	0.692	0.76
0.746	0.752	0.779	0.705	0.736	0.736	0.748	0.756	0.776	0.742	0.742	0.751	0.747	0.776	0.783	0.752	0.742	0.729	0.713	0.788	0.806	0.735	0.737	0.762	0.716	0.746	0.846	0.703	0.732	0.729	0.718	0.795	0.709	0.736	0.783	0.704	0.73	0.756	0.84	0.708	0.744	0.7	0.724	0.763	0.772	0.696	0.787	0.791	0.693	0.761
0.747	0.753	0.781	0.707	0.737	0.739	0.749	0.758	0.776	0.742	0.744	0.752	0.749	0.778	0.785	0.754	0.744	0.732	0.714	0.789	0.806	0.736	0.738	0.764	0.716	0.746	0.848	0.703	0.726	0.729	0.719	0.796	0.71	0.738	0.782	0.701	0.731	0.757	0.842	0.71	0.743	0.7	0.726	0.763	0.772	0.697	0.786	0.791	0.695	0.762
0.75	0.754	0.782	0.708	0.738	0.74	0.75	0.759	0.777	0.744	0.746	0.752	0.751	0.778	0.788	0.756	0.745	0.731	0.714	0.79	0.807	0.738	0.739	0.764	0.717	0.751	0.85	0.704	0.726	0.729	0.722	0.797	0.71	0.739	0.783	0.702	0.732	0.758	0.841	0.71	0.745	0.7	0.727	0.765	0.773	0.699	0.788	0.793	0.696	0.764
0.752	0.755	0.783	0.709	0.74	0.74	0.75	0.761	0.779	0.744	0.747	0.753	0.753	0.779	0.788	0.758	0.747	0.731	0.714	0.792	0.808	0.74	0.74	0.763	0.718	0.751	0.851	0.705	0.729	0.727	0.722	0.799	0.711	0.74	0.785	0.706	0.734	0.758	0.842	0.711	0.747	0.701	0.728	0.768	0.775	0.7	0.789	0.795	0.697	0.765
0.753	0.756	0.783	0.71	0.741	0.742	0.751	0.763	0.778	0.746	0.748	0.754	0.755	0.781	0.789	0.76	0.748	0.731	0.715	0.792	0.808	0.742	0.741	0.765	0.719	0.75	0.851	0.706	0.731	0.728	0.724	0.8	0.712	0.741	0.784	0.708	0.735	0.758	0.843	0.711	0.745	0.701	0.729	0.768	0.775	0.701	0.79	0.796	0.698	0.766
0.755	0.758	0.784	0.712	0.742	0.743	0.752	0.764	0.781	0.747	0.749	0.755	0.756	0.782	0.789	0.761	0.75	0.734	0.717	0.794	0.809	0.743	0.742	0.765	0.72	0.748	0.853	0.707	0.73	0.727	0.725	0.801	0.713	0.742	0.785	0.71	0.735	0.76	0.844	0.712	0.746	0.703	0.73	0.767	0.777	0.701	0.791	0.798	0.699	0.767
0.757	0.759	0.786	0.713	0.743	0.744	0.752	0.765	0.782	0.748	0.751	0.757	0.757	0.784	0.791	0.761	0.751	0.736	0.718	0.795	0.811	0.744	0.743	0.768	0.72	0.749	0.852	0.705	0.73	0.73	0.725	0.803	0.712	0.743	0.788	0.711	0.736	0.76	0.845	0.712	0.745	0.703	0.73	0.768	0.779	0.701	0.792	0.798	0.701	0.767
0.758	0.759	0.787	0.714	0.745	0.745	0.753	0.766	0.783	0.749	0.752	0.757	0.758	0.785	0.794	0.763	0.752	0.735	0.721	0.796	0.811	0.746	0.745	0.768	0.721	0.749	0.851	0.706	0.73	0.732	0.727	0.804	0.714	0.744	0.788	0.712	0.738	0.761	0.845	0.713	0.745	0.705	0.732	0.769	0.779	0.702	0.794	0.799	0.702	0.768
0.76	0.761	0.786	0.716	0.746	0.747	0.755	0.768	0.784	0.75	0.754	0.759	0.759	0.787	0.792	0.763	0.753	0.735	0.723	0.798	0.812	0.747	0.746	0.766	0.722	0.749	0.853	0.706	0.729	0.737	0.728	0.804	0.715	0.745	0.79	0.714	0.74	0.763	0.844	0.715	0.746	0.707	0.733	0.77	0.78	0.703	0.795	0.802	0.703	0.769
0.761	0.762	0.788	0.716	0.747	0.748	0.756	0.768	0.786	0.75	0.754	0.759	0.76	0.789	0.794	0.763	0.754	0.738	0.723	0.799	0.813	0.747	0.748	0.773	0.722	0.75	0.855	0.708	0.731	0.731	0.729	0.804	0.716	0.746	0.791	0.708	0.74	0.763	0.846	0.715	0.748	0.707	0.734	0.773	0.781	0.704	0.795	0.804	0.704	0.77
0.762	0.763	0.79	0.718	0.748	0.749	0.757	0.769	0.787	0.752	0.756	0.76	0.761	0.79	0.795	0.765	0.755	0.739	0.726	0.8	0.814	0.749	0.75	0.772	0.724	0.752	0.855	0.708	0.73	0.73	0.732	0.806	0.716	0.747	0.792	0.714	0.74	0.763	0.846	0.717	0.746	0.708	0.736	0.774	0.782	0.705	0.796	0.805	0.706	0.771
0.763	0.764	0.79	0.718	0.748	0.75	0.759	0.771	0.789	0.753	0.757	0.762	0.761	0.792	0.796	0.767	0.756	0.739	0.727	0.8	0.818	0.75	0.75	0.772	0.725	0.752	0.857	0.709	0.733	0.737	0.732	0.808	0.717	0.748	0.793	0.714	0.741	0.764	0.846	0.719	0.749	0.71	0.737	0.776	0.784	0.707	0.798	0.805	0.707	0.772
0.765	0.766	0.791	0.72	0.75	0.751	0.761	0.773	0.79	0.754	0.758	0.763	0.763	0.795	0.8	0.77	0.757	0.741	0.729	0.801	0.818	0.752	0.753	0.774	0.725	0.753	0.857	0.709	0.734	0.735	0.733	0.808	0.717	0.749	0.795	0.716	0.743	0.765	0.848	0.718	0.748	0.71	0.738	0.776	0.785	0.708	0.799	0.807	0.708	0.773
0.766	0.767	0.792	0.721	0.75	0.753	0.761	0.775	0.791	0.756	0.76	0.764	0.764	0.795	0.8	0.771	0.758	0.742	0.729	0.803	0.817	0.753	0.754	0.774	0.726	0.754	0.855	0.71	0.735	0.733	0.734	0.809	0.718	0.749	0.795	0.714	0.742	0.765	0.849	0.72	0.749	0.711	0.739	0.778	0.786	0.71	0.799	0.808	0.71	0.774
0.767	0.768	0.792	0.722	0.75	0.753	0.762	0.776	0.792	0.757	0.76	0.765	0.765	0.796	0.8	0.772	0.758	0.743	0.731	0.804	0.819	0.755	0.755	0.774	0.727	0.754	0.856	0.711	0.735	0.733	0.735	0.81	0.72	0.749	0.796	0.716	0.744	0.767	0.85	0.72	0.749	0.712	0.742	0.78	0.786	0.71	0.799	0.81	0.71	0.775
0.768	0.77	0.794	0.725	0.753	0.755	0.764	0.777	0.793	0.759	0.763	0.766	0.767	0.797	0.802	0.773	0.76	0.743	0.733	0.806	0.822	0.756	0.756	0.775	0.727	0.757	0.86	0.712	0.738	0.738	0.737	0.812	0.721	0.751	0.798	0.718	0.745	0.768	0.85	0.721	0.75	0.711	0.743	0.78	0.788	0.712	0.802	0.811	0.712	0.776
0.77	0.772	0.795	0.725	0.753	0.755	0.765	0.778	0.796	0.76	0.763	0.767	0.767	0.797	0.801	0.775	0.762	0.744	0.735	0.807	0.821	0.757	0.758	0.777	0.727	0.757	0.86	0.714	0.74	0.736	0.739	0.814	0.721	0.752	0.799	0.719	0.745	0.768	0.851	0.721	0.751	0.714	0.744	0.781	0.79	0.712	0.802	0.81	0.714	0.777
0.771	0.773	0.795	0.726	0.754	0.757	0.766	0.78	0.797	0.761	0.764	0.767	0.768	0.798	0.803	0.777	0.763	0.744	0.736	0.809	0.825	0.759	0.759	0.78	0.729	0.759	0.858	0.714	0.738	0.735	0.74	0.815	0.723	0.753	0.8	0.718	0.745	0.768	0.852	0.721	0.752	0.713	0.745	0.781	0.79	0.713	0.803	0.813	0.715	0.778
0.772	0.774	0.797	0.727	0.754	0.759	0.768	0.781	0.799	0.762	0.766	0.769	0.769	0.799	0.805	0.779	0.764	0.746	0.736	0.81	0.824	0.76	0.76	0.78	0.729	0.76	0.86	0.714	0.736	0.738	0.742	0.816	0.723	0.754	0.801	0.72	0.747	0.77	0.853	0.722	0.751	0.713	0.747	0.783	0.791	0.715	0.804	0.814	0.716	0.78
0.773	0.775	0.799	0.728	0.756	0.758	0.769	0.782	0.8	0.764	0.768	0.769	0.771	0.8	0.804	0.781	0.765	0.748	0.737	0.811	0.823	0.761	0.761	0.782	0.731	0.76	0.859	0.714	0.737	0.737	0.742	0.817	0.724	0.756	0.802	0.726	0.749	0.771	0.853	0.723	0.751	0.714	0.747	0.784	0.792	0.716	0.805	0.815	0.717	0.781
0.774	0.776	0.8	0.73	0.758	0.76	0.769	0.783	0.802	0.765	0.769	0.77	0.772	0.803	0.806	0.781	0.766	0.748	0.739	0.813	0.827	0.763	0.763	0.78	0.732	0.761	0.86	0.716	0.736	0.738	0.744	0.819	0.725	0.757	0.804	0.729	0.749	0.771	0.853	0.724	0.751	0.715	0.749	0.786	0.792	0.718	0.806	0.816	0.718	0.783
0.775	0.778	0.8	0.731	0.76	0.761	0.77	0.786	0.804	0.765	0.771	0.771	0.775	0.804	0.81	0.781	0.768	0.748	0.74	0.814	0.828	0.765	0.764	0.781	0.733	0.761	0.863	0.717	0.738	0.738	0.744	0.82	0.725	0.758	0.806	0.728	0.751	0.773	0.856	0.724	0.752	0.715	0.75	0.786	0.794	0.719	0.809	0.817	0.719	0.784
0.776	0.78	0.801	0.733	0.761	0.762	0.772	0.787	0.805	0.767	0.772	0.774	0.775	0.806	0.808	0.782	0.77	0.749	0.74	0.814	0.83	0.766	0.766	0.784	0.736	0.76	0.863	0.718	0.741	0.737	0.746	0.82	0.727	0.76	0.804	0.727	0.752	0.774	0.855	0.726	0.755	0.718	0.751	0.788	0.796	0.72	0.81	0.818	0.721	0.786
0.777	0.78	0.802	0.734	0.762	0.763	0.773	0.789	0.807	0.767	0.773	0.774	0.777	0.807	0.809	0.784	0.771	0.752	0.741	0.816	0.829	0.767	0.766	0.785	0.737	0.761	0.863	0.719	0.742	0.737	0.747	0.822	0.728	0.762	0.805	0.73	0.753	0.774	0.856	0.727	0.755	0.719	0.753	0.79	0.796	0.721	0.811	0.82	0.722	0.788
0.779	0.782	0.804	0.735	0.763	0.764	0.774	0.789	0.808	0.769	0.775	0.774	0.778	0.81	0.809	0.786	0.772	0.754	0.741	0.818	0.831	0.768	0.768	0.786	0.738	0.762	0.865	0.72	0.744	0.735	0.748	0.823	0.73	0.763	0.806	0.73	0.755	0.776	0.858	0.727	0.756	0.72	0.752	0.793	0.797	0.722	0.811	0.823	0.724	0.788
0.781	0.783	0.805	0.736	0.764	0.766	0.775	0.789	0.809	0.77	0.776	0.775	0.779	0.811	0.812	0.786	0.773	0.755	0.742	0.818	0.831	0.77	0.769	0.789	0.739	0.763	0.866	0.721	0.744	0.738	0.75	0.824	0.731	0.764	0.808	0.729	0.756	0.777	0.859	0.729	0.754	0.721	0.754	0.795	0.798	0.723	0.811	0.822	0.725	0.789
0.783	0.785	0.806	0.737	0.766	0.767	0.776	0.791	0.811	0.772	0.777	0.777	0.782	0.811	0.812	0.785	0.774	0.754	0.743	0.82	0.832	0.771	0.771	0.787	0.739	0.764	0.866	0.722	0.742	0.744	0.751	0.825	0.733	0.765	0.81	0.732	0.758	0.777	0.858	0.729	0.757	0.723	0.755	0.797	0.8	0.724	0.814	0.824	0.727	0.79
0.783	0.786	0.806	0.738	0.767	0.768	0.777	0.792	0.813	0.773	0.777	0.778	0.784	0.812	0.814	0.787	0.775	0.755	0.745	0.821	0.832	0.772	0.772	0.789	0.741	0.765	0.867	0.722	0.742	0.743	0.753	0.826	0.734	0.767	0.812	0.733	0.759	0.778	0.86	0.73	0.758	0.724	0.757	0.798	0.801	0.725	0.813	0.828	0.727	0.791
0.785	0.787	0.807	0.739	0.768	0.768	0.778	0.793	0.815	0.774	0.778	0.779	0.786	0.813	0.817	0.789	0.776	0.757	0.746	0.822	0.834	0.773	0.773	0.788	0.742	0.767	0.868	0.723	0.747	0.742	0.754	0.828	0.735	0.768	0.812	0.733	0.76	0.78	0.861	0.732	0.759	0.724	0.758	0.799	0.801	0.726	0.815	0.826	0.729	0.792
0.787	0.788	0.809	0.739	0.769	0.769	0.778	0.794	0.816	0.774	0.78	0.779	0.786	0.814	0.815	0.79	0.777	0.757	0.746	0.823	0.834	0.774	0.774	0.788	0.744	0.768	0.868	0.724	0.745	0.742	0.755	0.829	0.736	0.768	0.814	0.738	0.761	0.781	0.861	0.731	0.759	0.724	0.76	0.8	0.802	0.727	0.817	0.827	0.73	0.793
0.788	0.79	0.81	0.741	0.771	0.771	0.779	0.795	0.818	0.776	0.781	0.779	0.788	0.817	0.817	0.791	0.779	0.757	0.747	0.825	0.835	0.776	0.776	0.789	0.745	0.769	0.869	0.725	0.746	0.745	0.758	0.831	0.736	0.769	0.815	0.738	0.763	0.782	0.861	0.733	0.761	0.727	0.761	0.801	0.803	0.729	0.817	0.83	0.732	0.795
0.79	0.791	0.809	0.742	0.772	0.772	0.78	0.797	0.819	0.776	0.782	0.781	0.79	0.818	0.818	0.793	0.779	0.758	0.749	0.826	0.836	0.777	0.777	0.79	0.745	0.771	0.87	0.725	0.746	0.744	0.759	0.832	0.738	0.771	0.816	0.739	0.764	0.783	0.862	0.735	0.761	0.728	0.762	0.802	0.805	0.73	0.819	0.831	0.734	0.796
0.791	0.793	0.811	0.743	0.773	0.772	0.78	0.799	0.819	0.778	0.783	0.782	0.789	0.819	0.819	0.794	0.781	0.759	0.75	0.827	0.838	0.778	0.778	0.792	0.746	0.771	0.87	0.727	0.747	0.744	0.761	0.835	0.739	0.772	0.817	0.738	0.765	0.784	0.863	0.736	0.763	0.729	0.764	0.803	0.804	0.732	0.82	0.833	0.734	0.797
0.791	0.793	0.813	0.744	0.775	0.774	0.782	0.8	0.82	0.779	0.785	0.782	0.791	0.82	0.822	0.796	0.782	0.76	0.752	0.828	0.84	0.78	0.78	0.797	0.747	0.772	0.871	0.728	0.75	0.746	0.762	0.837	0.739	0.774	0.819	0.739	0.766	0.785	0.865	0.736	0.763	0.731	0.764	0.804	0.806	0.733	0.821	0.834	0.736	0.799
0.792	0.795	0.813	0.746	0.777	0.775	0.783	0.801	0.821	0.78	0.786	0.783	0.792	0.822	0.823	0.797	0.783	0.761	0.754	0.83	0.84	0.781	0.781	0.797	0.748	0.773	0.874	0.729	0.754	0.748	0.763	0.837	0.74	0.775	0.82	0.74	0.767	0.786	0.865	0.737	0.764	0.732	0.766	0.805	0.807	0.733	0.823	0.833	0.737	0.8
0.793	0.796	0.814	0.747	0.778	0.778	0.783	0.802	0.822	0.781	0.787	0.784	0.792	0.823	0.823	0.797	0.784	0.761	0.755	0.831	0.841	0.782	0.782	0.796	0.749	0.774	0.873	0.729	0.753	0.749	0.765	0.838	0.742	0.777	0.82	0.741	0.769	0.787	0.866	0.738	0.765	0.733	0.768	0.806	0.808	0.735	0.823	0.835	0.738	0.801
0.793	0.797	0.814	0.747	0.778	0.777	0.785	0.804	0.823	0.783	0.788	0.786	0.793	0.824	0.824	0.798	0.785	0.761	0.756	0.831	0.842	0.783	0.784	0.799	0.75	0.775	0.873	0.731	0.754	0.749	0.766	0.838	0.741	0.778	0.822	0.742	0.769	0.789	0.866	0.738	0.766	0.733	0.768	0.807	0.808	0.737	0.824	0.836	0.739	0.802
0.795	0.799	0.816	0.749	0.778	0.779	0.786	0.805	0.823	0.784	0.789	0.787	0.794	0.825	0.827	0.799	0.786	0.762	0.758	0.833	0.843	0.784	0.785	0.798	0.751	0.776	0.875	0.731	0.759	0.749	0.767	0.84	0.742	0.779	0.822	0.743	0.771	0.789	0.866	0.74	0.767	0.734	0.769	0.809	0.81	0.738	0.824	0.837	0.74	0.804
0.795	0.799	0.817	0.75	0.779	0.78	0.787	0.806	0.824	0.785	0.791	0.787	0.795	0.826	0.827	0.801	0.789	0.764	0.759	0.834	0.843	0.785	0.786	0.798	0.752	0.778	0.875	0.733	0.756	0.75	0.768	0.842	0.744	0.779	0.824	0.744	0.772	0.79	0.867	0.741	0.768	0.735	0.77	0.811	0.81	0.739	0.825	0.838	0.741	0.805
0.797	0.802	0.817	0.751	0.781	0.781	0.788	0.808	0.825	0.787	0.792	0.787	0.796	0.827	0.827	0.802	0.789	0.766	0.761	0.835	0.846	0.787	0.788	0.797	0.752	0.779	0.876	0.734	0.756	0.752	0.769	0.844	0.746	0.78	0.826	0.746	0.772	0.792	0.866	0.742	0.769	0.738	0.772	0.811	0.811	0.74	0.826	0.841	0.742	0.806
[truncated: 60 more columns]

## Sheet: mean_se_graphs
SBW25+pSXn	SBW25+pSXn	SBW25+pSXn	SBW25+pSXn	SBW25+pSXn	SBW25+pSXn	SBW25+pSXn-serTGA	SBW25+pSXn-serTGA	SBW25+pSXn-serTGA	SBW25+pSXn-serTGA	SBW25+pSXn-serTGA	SBW25+pSXn-serTGA	SBW25+pSXn-serCGA	SBW25+pSXn-serCGA	SBW25+pSXn-serCGA	SBW25+pSXn-serCGA	SBW25+pSXn-serCGA	SBW25+pSXn-serCGA	delserCGA1+pSXn-serCGA	delserCGA1+pSXn-serCGA	delserCGA1+pSXn-serCGA	delserCGA1+pSXn-serCGA	delserCGA1+pSXn-serCGA	delserCGA1+pSXn-serCGA	delserCGA1+pSXn	delserCGA1+pSXn	delserCGA1+pSXn	delserCGA1+pSXn	delserCGA1+pSXn	delserCGA1+pSXn	delserCGA1+pSXn-serTGA	delserCGA1+pSXn-serTGA	delserCGA1+pSXn-serTGA	delserCGA1+pSXn-serTGA	delserCGA1+pSXn-serTGA	delserCGA1+pSXn-serTGA	delserCGA2+pSXn	delserCGA2+pSXn	delserCGA2+pSXn	delserCGA2+pSXn	delserCGA2+pSXn	delserCGA2+pSXn	delserCGA2+pSXn-serCGA	delserCGA2+pSXn-serCGA	delserCGA2+pSXn-serCGA	delserCGA2+pSXn-serCGA	delserCGA2+pSXn-serCGA	delserCGA2+pSXn-serCGA	delserCGA2+pSXn-serTGA	delserCGA2+pSXn-serTGA
B2	B5	B8	E3	E6	E9	B3	B6	B9	E4	E7	E10	B4	B7	B10	E2	E5	E8	C4	C7	C10	F2	F5	F8	C2	C5	C8	F3	F6	F9	C3	C6	C9	F4	F7	F10	D2	D5	D8	G3	G6	G9	D4	D7	D10	G2	G5	G8	D3	D6
0.017375	0.012375	0.009375	0.009375	0.009375	0.013375	0.016375	0.015375	0.016375	0.011375	0.024375	0.019375	0.021375	0.010375	0.022375	0.013375	0.011375	0.008375	0.016375	0.015375	0.015375	0.008375	0.007375	0.017375	0.022375	0.013375	0.016375	0.003375	0.015375	0.018375	0.016375	0.009375	0.007375	0.003375	0.014375	0.012375	0.015375	0.008375	0.011375	0.019375	0.011375	0.011375	0.006375	0.007375	0.011375	0.005375	0.012375	0.013375	0.016375	0.009375
0.017375	0.016375	0.017375	0.014375	0.010375	0.016375	0.012375	0.014375	0.020375	0.013375	0.013375	0.022375	0.019375	0.019375	0.028375	0.014375	0.012375	0.010375	0.015375	0.022375	0.020375	0.011375	0.009375	0.018375	0.016375	0.012375	0.016375	0.006375	0.016375	0.015375	0.019375	0.010375	0.006375	0.008375	0.016375	0.019375	0.007375	0.012375	0.014375	0.023375	0.015375	0.014375	0.018375	0.007375	0.019375	0.008375	0.015375	0.019375	0.015375	0.011375
0.0165	0.0145	0.0205	0.0185	0.0115	0.0195	0.0145	0.0145	0.0205	0.0175	0.0125	0.0285	0.0185	0.0175	0.0285	0.0165	0.0115	0.0125	0.0155	0.0235	0.0205	0.0145	0.0125	0.0245	0.0145	0.0115	0.0175	0.0095	0.0165	0.0245	0.0215	0.0145	0.0115	0.0155	0.0195	0.0195	0.0105	0.0115	0.0155	0.0235	0.0175	0.0135	0.0185	0.0105	0.0245	0.0095	0.0135	0.0175	0.0185	0.0115
0.017375	0.015375	0.018375	0.019375	0.013375	0.024375	0.014375	0.014375	0.018375	0.019375	0.016375	0.025375	0.018375	0.018375	0.028375	0.017375	0.014375	0.017375	0.019375	0.027375	0.020375	0.018375	0.015375	0.022375	0.014375	0.012375	0.020375	0.011375	0.019375	0.024375	0.021375	0.017375	0.022375	0.013375	0.021375	0.019375	0.011375	0.013375	0.022375	0.024375	0.020375	0.015375	0.014375	0.011375	0.020375	0.010375	0.015375	0.017375	0.019375	0.011375
0.018625	0.016625	0.021625	0.020625	0.016625	0.022625	0.017625	0.016625	0.020625	0.022625	0.020625	0.025625	0.017625	0.018625	0.028625	0.018625	0.016625	0.017625	0.021625	0.024625	0.021625	0.020625	0.016625	0.020625	0.018625	0.015625	0.022625	0.014625	0.021625	0.020625	0.026625	0.016625	0.021625	0.016625	0.019625	0.018625	0.013625	0.014625	0.020625	0.025625	0.021625	0.016625	0.020625	0.012625	0.020625	0.012625	0.017625	0.019625	0.021625	0.014625
0.019625	0.017625	0.022625	0.020625	0.019625	0.019625	0.018625	0.016625	0.021625	0.022625	0.019625	0.026625	0.017625	0.019625	0.029625	0.021625	0.016625	0.016625	0.019625	0.024625	0.021625	0.022625	0.016625	0.020625	0.018625	0.017625	0.023625	0.015625	0.020625	0.019625	0.025625	0.017625	0.020625	0.018625	0.019625	0.018625	0.015625	0.016625	0.020625	0.027625	0.022625	0.018625	0.019625	0.014625	0.020625	0.012625	0.019625	0.020625	0.022625	0.015625
0.021625	0.017625	0.022625	0.020625	0.020625	0.020625	0.016625	0.016625	0.021625	0.022625	0.017625	0.026625	0.017625	0.020625	0.028625	0.021625	0.017625	0.017625	0.020625	0.024625	0.021625	0.022625	0.016625	0.021625	0.019625	0.017625	0.024625	0.015625	0.020625	0.020625	0.024625	0.019625	0.018625	0.017625	0.019625	0.018625	0.015625	0.017625	0.020625	0.029625	0.022625	0.018625	0.018625	0.016625	0.020625	0.013625	0.019625	0.020625	0.021625	0.015625
0.021625	0.018625	0.024625	0.023625	0.018625	0.021625	0.016625	0.016625	0.022625	0.022625	0.017625	0.027625	0.017625	0.021625	0.028625	0.021625	0.017625	0.016625	0.021625	0.024625	0.021625	0.022625	0.015625	0.021625	0.019625	0.018625	0.025625	0.014625	0.021625	0.020625	0.024625	0.019625	0.019625	0.018625	0.020625	0.019625	0.016625	0.017625	0.020625	0.031625	0.022625	0.018625	0.020625	0.015625	0.021625	0.013625	0.018625	0.021625	0.022625	0.017625
0.020625	0.018625	0.025625	0.024625	0.017625	0.021625	0.019625	0.017625	0.022625	0.023625	0.018625	0.027625	0.019625	0.022625	0.028625	0.022625	0.017625	0.017625	0.021625	0.024625	0.021625	0.022625	0.016625	0.022625	0.019625	0.019625	0.026625	0.015625	0.022625	0.021625	0.026625	0.020625	0.018625	0.019625	0.021625	0.020625	0.016625	0.017625	0.021625	0.030625	0.022625	0.018625	0.020625	0.015625	0.021625	0.015625	0.019625	0.020625	0.024625	0.017625
0.021625	0.019625	0.026625	0.025625	0.017625	0.021625	0.020625	0.018625	0.022625	0.024625	0.017625	0.027625	0.020625	0.023625	0.029625	0.022625	0.017625	0.017625	0.023625	0.025625	0.022625	0.022625	0.017625	0.022625	0.020625	0.019625	0.026625	0.016625	0.023625	0.021625	0.026625	0.021625	0.020625	0.020625	0.022625	0.020625	0.017625	0.017625	0.021625	0.030625	0.022625	0.019625	0.022625	0.016625	0.021625	0.015625	0.019625	0.020625	0.025625	0.019625
0.022625	0.018625	0.025625	0.025625	0.018625	0.021625	0.020625	0.019625	0.023625	0.025625	0.018625	0.027625	0.020625	0.023625	0.028625	0.022625	0.018625	0.018625	0.022625	0.024625	0.022625	0.023625	0.017625	0.022625	0.021625	0.020625	0.027625	0.017625	0.023625	0.022625	0.027625	0.023625	0.021625	0.019625	0.023625	0.021625	0.018625	0.018625	0.021625	0.029625	0.022625	0.019625	0.022625	0.016625	0.022625	0.016625	0.018625	0.021625	0.026625	0.020625
0.022625	0.019625	0.025625	0.025625	0.019625	0.022625	0.021625	0.019625	0.023625	0.026625	0.018625	0.028625	0.020625	0.023625	0.029625	0.022625	0.019625	0.018625	0.022625	0.024625	0.023625	0.023625	0.018625	0.022625	0.023625	0.020625	0.028625	0.018625	0.024625	0.022625	0.029625	0.025625	0.022625	0.020625	0.024625	0.021625	0.019625	0.019625	0.022625	0.030625	0.022625	0.019625	0.022625	0.017625	0.022625	0.017625	0.018625	0.021625	0.027625	0.022625
0.023625	0.019625	0.024625	0.026625	0.019625	0.022625	0.021625	0.020625	0.023625	0.028625	0.018625	0.028625	0.021625	0.024625	0.029625	0.022625	0.020625	0.019625	0.023625	0.024625	0.023625	0.023625	0.018625	0.023625	0.023625	0.020625	0.028625	0.019625	0.024625	0.022625	0.030625	0.027625	0.023625	0.021625	0.024625	0.022625	0.020625	0.020625	0.022625	0.030625	0.022625	0.019625	0.023625	0.017625	0.022625	0.017625	0.017625	0.022625	0.027625	0.023625
0.024875	0.020875	0.025875	0.026875	0.020875	0.023875	0.022875	0.021875	0.024875	0.030875	0.019875	0.029875	0.022875	0.025875	0.029875	0.022875	0.022875	0.019875	0.024875	0.024875	0.023875	0.023875	0.019875	0.023875	0.022875	0.021875	0.029875	0.020875	0.025875	0.023875	0.031875	0.029875	0.024875	0.022875	0.025875	0.022875	0.020875	0.021875	0.022875	0.031875	0.023875	0.019875	0.023875	0.018875	0.022875	0.018875	0.018875	0.022875	0.028875	0.025875
0.024625	0.021625	0.026625	0.028625	0.021625	0.023625	0.022625	0.022625	0.025625	0.032625	0.020625	0.029625	0.023625	0.026625	0.030625	0.023625	0.023625	0.020625	0.025625	0.024625	0.024625	0.023625	0.020625	0.023625	0.024625	0.022625	0.030625	0.021625	0.025625	0.023625	0.033625	0.031625	0.025625	0.023625	0.026625	0.023625	0.021625	0.021625	0.023625	0.031625	0.023625	0.020625	0.024625	0.018625	0.023625	0.019625	0.018625	0.022625	0.029625	0.024625
0.02575	0.02175	0.02775	0.02975	0.02375	0.02475	0.02375	0.02375	0.02575	0.03475	0.02175	0.03075	0.02375	0.02775	0.03075	0.02375	0.02375	0.02175	0.02575	0.02575	0.02575	0.02475	0.02275	0.02475	0.02475	0.02475	0.03075	0.02175	0.02675	0.02375	0.03575	0.03275	0.02775	0.02475	0.02775	0.02475	0.02275	0.02275	0.02375	0.03275	0.02475	0.02175	0.02475	0.01975	0.02375	0.01975	0.01975	0.02375	0.03075	0.02475
0.026875	0.023875	0.028875	0.031875	0.024875	0.025875	0.024875	0.024875	0.026875	0.035875	0.022875	0.031875	0.024875	0.029875	0.031875	0.024875	0.023875	0.022875	0.026875	0.025875	0.026875	0.024875	0.022875	0.024875	0.025875	0.025875	0.031875	0.021875	0.026875	0.024875	0.036875	0.033875	0.029875	0.025875	0.028875	0.025875	0.022875	0.023875	0.024875	0.033875	0.025875	0.021875	0.025875	0.020875	0.024875	0.020875	0.020875	0.023875	0.031875	0.024875
0.027625	0.024625	0.030625	0.033625	0.025625	0.026625	0.025625	0.025625	0.027625	0.035625	0.024625	0.033625	0.024625	0.031625	0.033625	0.024625	0.024625	0.023625	0.027625	0.026625	0.028625	0.025625	0.024625	0.026625	0.026625	0.027625	0.032625	0.022625	0.027625	0.024625	0.037625	0.033625	0.031625	0.026625	0.029625	0.026625	0.024625	0.025625	0.025625	0.035625	0.025625	0.022625	0.027625	0.021625	0.024625	0.021625	0.021625	0.024625	0.032625	0.025625
0.02975	0.02675	0.03175	0.03475	0.02675	0.02875	0.02675	0.02775	0.02975	0.03675	0.02475	0.03375	0.02675	0.03275	0.03575	0.02575	0.02575	0.02575	0.02875	0.02775	0.03075	0.02675	0.02575	0.02675	0.02775	0.02975	0.03475	0.02375	0.02875	0.02575	0.03775	0.03475	0.03375	0.02975	0.03175	0.02775	0.02575	0.02675	0.02575	0.03575	0.02675	0.02375	0.02875	0.02275	0.02675	0.02175	0.02175	0.02575	0.03475	0.02675
0.03175	0.02875	0.03375	0.03475	0.02775	0.03075	0.02775	0.02975	0.03175	0.03675	0.02575	0.03475	0.02775	0.03375	0.03775	0.02675	0.02775	0.02775	0.03075	0.02875	0.03175	0.02775	0.02775	0.02875	0.02875	0.03075	0.03575	0.02575	0.03075	0.02675	0.03775	0.03575	0.03675	0.03175	0.03375	0.03075	0.02675	0.02875	0.02675	0.03775	0.02775	0.02475	0.03075	0.02375	0.02775	0.02275	0.02275	0.02775	0.03575	0.02875
0.03475	0.03075	0.03375	0.03575	0.02775	0.03075	0.03075	0.03075	0.03275	0.03775	0.02675	0.03575	0.02975	0.03475	0.03875	0.02875	0.02875	0.02975	0.03275	0.03075	0.03275	0.02975	0.02775	0.03075	0.02975	0.03275	0.03675	0.02675	0.03175	0.02775	0.03875	0.03775	0.03875	0.03475	0.03475	0.03175	0.02775	0.03075	0.02775	0.03875	0.02875	0.02575	0.03175	0.02575	0.02975	0.02475	0.02375	0.03075	0.03575	0.02975
0.03775	0.03175	0.03575	0.03575	0.02975	0.03175	0.03275	0.03175	0.03475	0.03775	0.02775	0.03875	0.03175	0.03475	0.04075	0.03175	0.02975	0.03075	0.03375	0.03175	0.03475	0.03175	0.02875	0.03275	0.03175	0.03275	0.03875	0.02875	0.03375	0.02875	0.03975	0.03975	0.04175	0.03675	0.03675	0.03375	0.02975	0.03175	0.02875	0.04075	0.03075	0.02675	0.03275	0.02675	0.03175	0.02675	0.02475	0.03275	0.03675	0.02975
0.04175	0.03375	0.03875	0.03575	0.03175	0.03475	0.03575	0.03375	0.03675	0.03875	0.02975	0.04075	0.03375	0.03675	0.04275	0.03475	0.03075	0.03375	0.03475	0.03375	0.03775	0.03375	0.02975	0.03375	0.03375	0.03375	0.03975	0.03075	0.03575	0.03075	0.03975	0.04275	0.04475	0.03975	0.03875	0.03575	0.03275	0.03275	0.02975	0.04175	0.03275	0.02975	0.03375	0.02775	0.03375	0.02875	0.02675	0.03375	0.03775	0.03175
0.04675	0.03675	0.04175	0.03775	0.03375	0.03775	0.03875	0.03675	0.03975	0.03975	0.03075	0.04375	0.03575	0.03975	0.04475	0.03775	0.03175	0.03675	0.03575	0.03575	0.03975	0.03675	0.03075	0.03675	0.03675	0.03375	0.04075	0.03175	0.03675	0.03275	0.03975	0.04375	0.04775	0.04275	0.04075	0.03775	0.03675	0.03375	0.03175	0.04275	0.03375	0.03175	0.03475	0.02875	0.03575	0.03175	0.02775	0.03575	0.03975	0.03275
0.04875	0.04075	0.04475	0.03875	0.03575	0.04175	0.04175	0.03975	0.04375	0.04275	0.03275	0.04575	0.03875	0.04375	0.04775	0.04075	0.03375	0.04075	0.03875	0.03675	0.04175	0.04175	0.03275	0.03875	0.03775	0.03475	0.04175	0.03275	0.03775	0.03375	0.04475	0.04375	0.05175	0.04675	0.04275	0.03875	0.04075	0.03475	0.03475	0.04375	0.03475	0.03275	0.03675	0.02975	0.03775	0.03575	0.02975	0.04075	0.04075	0.03375
0.04675	0.04575	0.04775	0.04075	0.03875	0.04675	0.04575	0.04375	0.04675	0.04375	0.03475	0.04875	0.04275	0.04875	0.05075	0.04175	0.03575	0.04475	0.04175	0.03875	0.04575	0.04375	0.03475	0.04175	0.03875	0.03575	0.04175	0.03475	0.03875	0.03575	0.04575	0.04175	0.05275	0.04775	0.04575	0.04075	0.04475	0.03575	0.03475	0.04475	0.03575	0.03475	0.03975	0.03175	0.03975	0.03775	0.03075	0.04475	0.04275	0.03475
0.04375	0.04775	0.04975	0.04275	0.04475	0.05075	0.04975	0.04675	0.04775	0.04475	0.03675	0.05075	0.04575	0.05075	0.05275	0.04075	0.03975	0.04875	0.04375	0.04175	0.04775	0.04575	0.03575	0.04575	0.04075	0.03675	0.04275	0.03575	0.03975	0.03675	0.04875	0.03975	0.05175	0.04375	0.04775	0.04275	0.04675	0.03675	0.03675	0.04675	0.03775	0.03575	0.04275	0.03275	0.04275	0.03975	0.03275	0.04775	0.04375	0.03575
0.04275	0.04375	0.04875	0.04475	0.04675	0.05275	0.05175	0.04675	0.04875	0.04575	0.03975	0.05475	0.05075	0.04675	0.05575	0.03975	0.04275	0.04975	0.04375	0.04475	0.04975	0.04475	0.03875	0.05075	0.04775	0.03575	0.04375	0.03875	0.04175	0.03775	0.05175	0.04175	0.04975	0.04075	0.05375	0.04575	0.04875	0.03775	0.03775	0.04775	0.03975	0.03675	0.04475	0.03475	0.04775	0.04375	0.03475	0.04975	0.04375	0.03975
0.04375	0.03875	0.04775	0.04675	0.04575	0.05275	0.05075	0.04475	0.04775	0.04775	0.04175	0.05775	0.05075	0.04475	0.05775	0.03975	0.04075	0.05075	0.04175	0.04975	0.04975	0.04075	0.03875	0.05575	0.05175	0.03675	0.04575	0.04075	0.04275	0.03775	0.05475	0.04075	0.04975	0.04275	0.05675	0.05175	0.04975	0.03875	0.03975	0.04875	0.04175	0.03875	0.04275	0.03775	0.05175	0.04375	0.03775	0.04775	0.04475	0.04575
0.044875	0.040875	0.049875	0.049875	0.043875	0.050875	0.051875	0.043875	0.049875	0.049875	0.045875	0.060875	0.047875	0.043875	0.058875	0.040875	0.037875	0.050875	0.040875	0.051875	0.050875	0.039875	0.037875	0.057875	0.053875	0.036875	0.046875	0.042875	0.044875	0.038875	0.056875	0.043875	0.051875	0.044875	0.057875	0.053875	0.050875	0.039875	0.040875	0.051875	0.042875	0.042875	0.039875	0.042875	0.053875	0.040875	0.041875	0.046875	0.046875	0.045875
0.04775	0.04475	0.04875	0.05175	0.04175	0.04975	0.04875	0.04175	0.04875	0.05175	0.04875	0.06175	0.04475	0.04575	0.05775	0.04375	0.03775	0.04975	0.04175	0.05275	0.04975	0.04475	0.03775	0.05875	0.05575	0.03775	0.04875	0.04375	0.04675	0.03975	0.05975	0.04475	0.04975	0.04675	0.05875	0.05675	0.05175	0.03875	0.04175	0.05375	0.04475	0.04575	0.04175	0.04675	0.05775	0.03775	0.04275	0.04475	0.04875	0.04475
0.04975	0.04875	0.05175	0.05575	0.04175	0.05075	0.04575	0.04475	0.05075	0.05575	0.04975	0.05975	0.04375	0.04975	0.05775	0.04575	0.03775	0.04975	0.04275	0.05275	0.05075	0.04575	0.03875	0.05975	0.05475	0.03975	0.04975	0.03975	0.04975	0.04075	0.06175	0.04675	0.04775	0.04875	0.05675	0.05975	0.04975	0.03875	0.04275	0.05575	0.04675	0.04875	0.04475	0.04875	0.05775	0.03375	0.04475	0.04375	0.04975	0.04475
0.050875	0.050875	0.053875	0.058875	0.041875	0.052875	0.045875	0.047875	0.053875	0.059875	0.048875	0.060875	0.044875	0.056875	0.058875	0.047875	0.039875	0.045875	0.043875	0.052875	0.051875	0.046875	0.041875	0.056875	0.052875	0.040875	0.053875	0.038875	0.052875	0.042875	0.063875	0.047875	0.047875	0.050875	0.055875	0.058875	0.050875	0.039875	0.044875	0.057875	0.049875	0.051875	0.047875	0.048875	0.055875	0.033875	0.046875	0.044875	0.049875	0.043875
0.048875	0.052875	0.054875	0.060875	0.044875	0.054875	0.046875	0.049875	0.054875	0.063875	0.047875	0.062875	0.045875	0.058875	0.059875	0.050875	0.042875	0.046875	0.045875	0.050875	0.054875	0.050875	0.043875	0.053875	0.049875	0.042875	0.055875	0.040875	0.055875	0.044875	0.064875	0.049875	0.047875	0.050875	0.054875	0.056875	0.052875	0.042875	0.047875	0.058875	0.050875	0.052875	0.049875	0.047875	0.053875	0.035875	0.046875	0.046875	0.051875	0.042875
0.050875	0.052875	0.057875	0.064875	0.046875	0.055875	0.049875	0.051875	0.057875	0.065875	0.047875	0.064875	0.047875	0.061875	0.062875	0.053875	0.044875	0.047875	0.047875	0.050875	0.057875	0.054875	0.046875	0.050875	0.044875	0.043875	0.059875	0.042875	0.058875	0.046875	0.066875	0.050875	0.046875	0.051875	0.053875	0.054875	0.049875	0.044875	0.049875	0.058875	0.052875	0.051875	0.050875	0.046875	0.052875	0.039875	0.044875	0.048875	0.054875	0.043875
0.056875	0.052875	0.060875	0.066875	0.049875	0.060875	0.051875	0.056875	0.060875	0.066875	0.048875	0.067875	0.050875	0.064875	0.064875	0.055875	0.047875	0.049875	0.049875	0.051875	0.060875	0.056875	0.049875	0.051875	0.044875	0.045875	0.059875	0.045875	0.060875	0.049875	0.067875	0.052875	0.047875	0.052875	0.056875	0.054875	0.049875	0.046875	0.053875	0.058875	0.053875	0.049875	0.052875	0.048875	0.054875	0.042875	0.042875	0.051875	0.054875	0.046875
0.061875	0.054875	0.062875	0.069875	0.051875	0.063875	0.052875	0.060875	0.061875	0.069875	0.049875	0.069875	0.053875	0.065875	0.066875	0.059875	0.050875	0.052875	0.054875	0.052875	0.063875	0.059875	0.052875	0.052875	0.046875	0.046875	0.057875	0.046875	0.060875	0.053875	0.069875	0.053875	0.048875	0.052875	0.059875	0.054875	0.049875	0.048875	0.055875	0.058875	0.053875	0.047875	0.056875	0.048875	0.055875	0.044875	0.043875	0.054875	0.056875	0.048875
0.064875	0.059875	0.065875	0.071875	0.053875	0.065875	0.054875	0.064875	0.064875	0.071875	0.048875	0.070875	0.053875	0.068875	0.069875	0.062875	0.052875	0.055875	0.058875	0.053875	0.066875	0.063875	0.054875	0.055875	0.047875	0.047875	0.056875	0.048875	0.060875	0.057875	0.071875	0.054875	0.051875	0.054875	0.063875	0.055875	0.047875	0.050875	0.057875	0.057875	0.053875	0.044875	0.059875	0.049875	0.057875	0.046875	0.048875	0.057875	0.061875	0.050875
0.066875	0.064875	0.070875	0.073875	0.056875	0.070875	0.055875	0.067875	0.067875	0.074875	0.050875	0.072875	0.057875	0.073875	0.074875	0.065875	0.054875	0.058875	0.061875	0.057875	0.071875	0.067875	0.057875	0.058875	0.048875	0.048875	0.057875	0.050875	0.058875	0.058875	0.073875	0.057875	0.055875	0.057875	0.066875	0.057875	0.047875	0.052875	0.056875	0.057875	0.052875	0.043875	0.062875	0.047875	0.061875	0.048875	0.048875	0.059875	0.063875	0.052875
0.069875	0.067875	0.071875	0.075875	0.058875	0.071875	0.057875	0.068875	0.070875	0.076875	0.054875	0.073875	0.060875	0.075875	0.076875	0.068875	0.056875	0.059875	0.061875	0.058875	0.073875	0.071875	0.060875	0.059875	0.048875	0.049875	0.056875	0.052875	0.056875	0.058875	0.075875	0.058875	0.059875	0.058875	0.068875	0.058875	0.047875	0.053875	0.056875	0.058875	0.051875	0.043875	0.064875	0.049875	0.062875	0.050875	0.046875	0.062875	0.066875	0.054875
0.072875	0.066875	0.072875	0.078875	0.061875	0.072875	0.058875	0.071875	0.073875	0.079875	0.054875	0.078875	0.061875	0.076875	0.079875	0.073875	0.059875	0.063875	0.063875	0.061875	0.077875	0.074875	0.063875	0.061875	0.050875	0.051875	0.056875	0.053875	0.053875	0.058875	0.077875	0.060875	0.058875	0.060875	0.070875	0.060875	0.048875	0.053875	0.057875	0.057875	0.051875	0.043875	0.067875	0.051875	0.066875	0.052875	0.050875	0.065875	0.069875	0.056875
0.07575	0.07075	0.07675	0.08075	0.06475	0.07675	0.05775	0.07375	0.07675	0.08175	0.05775	0.08175	0.06075	0.08075	0.08475	0.07575	0.06275	0.06675	0.06475	0.06475	0.07975	0.07675	0.06675	0.06575	0.05275	0.05375	0.05875	0.05675	0.05275	0.05775	0.07975	0.06375	0.06275	0.06275	0.07175	0.06275	0.05175	0.05475	0.05575	0.05775	0.05375	0.04475	0.07075	0.05575	0.06975	0.05375	0.05275	0.06875	0.07175	0.05875
0.078875	0.073875	0.078875	0.082875	0.067875	0.080875	0.058875	0.075875	0.079875	0.084875	0.059875	0.085875	0.058875	0.082875	0.086875	0.077875	0.065875	0.068875	0.064875	0.067875	0.082875	0.080875	0.068875	0.066875	0.053875	0.054875	0.060875	0.057875	0.053875	0.056875	0.081875	0.066875	0.061875	0.065875	0.079875	0.064875	0.051875	0.055875	0.052875	0.061875	0.055875	0.045875	0.072875	0.061875	0.073875	0.056875	0.054875	0.071875	0.074875	0.060875
0.08075	0.07775	0.08075	0.08575	0.07075	0.08275	0.06075	0.07875	0.08275	0.08675	0.06175	0.08475	0.06675	0.08475	0.08975	0.07975	0.06875	0.07275	0.06575	0.07175	0.08575	0.08275	0.07175	0.06975	0.05575	0.05675	0.05975	0.05975	0.05575	0.05675	0.08375	0.06875	0.06275	0.06875	0.07575	0.06775	0.05275	0.05675	0.05275	0.06175	0.05575	0.04675	0.07575	0.06775	0.07575	0.05875	0.05775	0.07475	0.07675	0.06275
0.08375	0.08075	0.08275	0.08875	0.07275	0.08575	0.06375	0.07975	0.08575	0.08975	0.06575	0.08375	0.07075	0.08675	0.09075	0.08275	0.07075	0.07575	0.06875	0.07275	0.08675	0.08575	0.07475	0.07275	0.05775	0.05775	0.06275	0.06075	0.05775	0.05775	0.08475	0.07175	0.06475	0.07175	0.07475	0.07075	0.05375	0.05875	0.05375	0.06175	0.05675	0.04775	0.07775	0.07075	0.08075	0.06175	0.06175	0.07775	0.07875	0.06575
0.086875	0.083875	0.085875	0.090875	0.075875	0.090875	0.069875	0.083875	0.086875	0.092875	0.066875	0.086875	0.072875	0.089875	0.096875	0.084875	0.073875	0.078875	0.069875	0.076875	0.094875	0.087875	0.077875	0.075875	0.057875	0.059875	0.065875	0.062875	0.063875	0.057875	0.087875	0.072875	0.066875	0.073875	0.083875	0.073875	0.056875	0.060875	0.057875	0.061875	0.057875	0.049875	0.080875	0.073875	0.082875	0.064875	0.064875	0.080875	0.080875	0.067875
0.08975	0.08675	0.09175	0.09375	0.07875	0.09275	0.07475	0.08575	0.08775	0.09575	0.07275	0.08975	0.07275	0.09275	0.10175	0.08775	0.07675	0.08175	0.07175	0.07675	0.09275	0.09075	0.08075	0.07875	0.05875	0.06075	0.06575	0.06475	0.06875	0.05875	0.08975	0.07775	0.06875	0.07675	0.07875	0.07675	0.05875	0.06275	0.06275	0.06575	0.05975	0.05275	0.08275	0.07575	0.08575	0.06675	0.06775	0.08375	0.08175	0.07075
0.092875	0.088875	0.093875	0.096875	0.081875	0.095875	0.077875	0.087875	0.094875	0.098875	0.076875	0.092875	0.078875	0.094875	0.103875	0.090875	0.079875	0.084875	0.075875	0.079875	0.097875	0.093875	0.082875	0.081875	0.058875	0.061875	0.070875	0.066875	0.069875	0.060875	0.092875	0.077875	0.071875	0.078875	0.092875	0.079875	0.060875	0.063875	0.061875	0.069875	0.061875	0.054875	0.084875	0.070875	0.088875	0.069875	0.070875	0.086875	0.084875	0.072875
0.095875	0.091875	0.099875	0.099875	0.084875	0.101875	0.079875	0.090875	0.095875	0.102875	0.074875	0.097875	0.082875	0.102875	0.105875	0.093875	0.082875	0.089875	0.078875	0.083875	0.103875	0.096875	0.085875	0.086875	0.063875	0.063875	0.073875	0.067875	0.069875	0.063875	0.094875	0.085875	0.074875	0.081875	0.083875	0.084875	0.062875	0.065875	0.060875	0.071875	0.064875	0.056875	0.088875	0.072875	0.093875	0.072875	0.073875	0.090875	0.087875	0.075875
0.098875	0.095875	0.105875	0.102875	0.086875	0.103875	0.081875	0.091875	0.094875	0.105875	0.084875	0.101875	0.084875	0.102875	0.110875	0.096875	0.085875	0.093875	0.083875	0.086875	0.107875	0.098875	0.088875	0.090875	0.064875	0.065875	0.077875	0.069875	0.067875	0.066875	0.097875	0.084875	0.078875	0.084875	0.094875	0.088875	0.064875	0.066875	0.061875	0.071875	0.066875	0.058875	0.091875	0.075875	0.096875	0.074875	0.076875	0.093875	0.089875	0.078875
0.100875	0.097875	0.107875	0.105875	0.089875	0.108875	0.084875	0.096875	0.102875	0.108875	0.082875	0.105875	0.086875	0.107875	0.112875	0.099875	0.088875	0.096875	0.086875	0.088875	0.109875	0.102875	0.091875	0.094875	0.064875	0.065875	0.080875	0.071875	0.065875	0.067875	0.099875	0.092875	0.082875	0.086875	0.095875	0.091875	0.066875	0.067875	0.063875	0.073875	0.069875	0.060875	0.093875	0.078875	0.099875	0.077875	0.078875	0.096875	0.092875	0.080875
0.104875	0.100875	0.112875	0.109875	0.093875	0.112875	0.090875	0.099875	0.103875	0.112875	0.088875	0.109875	0.090875	0.111875	0.114875	0.103875	0.093875	0.102875	0.089875	0.091875	0.111875	0.106875	0.094875	0.097875	0.066875	0.068875	0.080875	0.074875	0.068875	0.069875	0.102875	0.091875	0.086875	0.090875	0.098875	0.095875	0.068875	0.069875	0.065875	0.078875	0.071875	0.062875	0.097875	0.082875	0.103875	0.081875	0.081875	0.102875	0.095875	0.083875
0.107875	0.103875	0.117875	0.113875	0.097875	0.115875	0.094875	0.104875	0.106875	0.116875	0.090875	0.113875	0.093875	0.115875	0.118875	0.106875	0.096875	0.106875	0.092875	0.094875	0.118875	0.109875	0.098875	0.102875	0.069875	0.071875	0.083875	0.076875	0.071875	0.071875	0.105875	0.098875	0.090875	0.092875	0.106875	0.100875	0.070875	0.072875	0.068875	0.078875	0.074875	0.065875	0.099875	0.087875	0.106875	0.085875	0.084875	0.105875	0.098875	0.086875
0.110875	0.106875	0.121875	0.116875	0.101875	0.119875	0.097875	0.108875	0.109875	0.120875	0.096875	0.118875	0.095875	0.118875	0.123875	0.109875	0.100875	0.110875	0.095875	0.098875	0.122875	0.112875	0.100875	0.105875	0.071875	0.073875	0.086875	0.078875	0.075875	0.074875	0.108875	0.103875	0.094875	0.095875	0.111875	0.104875	0.072875	0.075875	0.080875	0.080875	0.077875	0.067875	0.103875	0.092875	0.113875	0.088875	0.087875	0.109875	0.101875	0.089875
0.113875	0.109875	0.133875	0.120875	0.104875	0.127875	0.101875	0.111875	0.114875	0.124875	0.096875	0.122875	0.097875	0.121875	0.131875	0.113875	0.103875	0.113875	0.097875	0.101875	0.128875	0.116875	0.103875	0.110875	0.075875	0.075875	0.087875	0.080875	0.080875	0.074875	0.110875	0.108875	0.099875	0.099875	0.112875	0.109875	0.076875	0.079875	0.071875	0.083875	0.079875	0.069875	0.106875	0.096875	0.121875	0.091875	0.089875	0.112875	0.104875	0.092875
0.118875	0.113875	0.139875	0.123875	0.108875	0.131875	0.106875	0.116875	0.117875	0.128875	0.101875	0.128875	0.101875	0.128875	0.132875	0.117875	0.107875	0.119875	0.100875	0.105875	0.132875	0.119875	0.107875	0.113875	0.078875	0.080875	0.092875	0.083875	0.083875	0.080875	0.114875	0.112875	0.103875	0.102875	0.120875	0.114875	0.077875	0.084875	0.074875	0.085875	0.083875	0.072875	0.109875	0.097875	0.122875	0.094875	0.093875	0.117875	0.107875	0.096875
0.122875	0.118875	0.144875	0.127875	0.112875	0.137875	0.111875	0.122875	0.122875	0.132875	0.102875	0.133875	0.105875	0.133875	0.138875	0.120875	0.109875	0.124875	0.103875	0.109875	0.139875	0.123875	0.110875	0.117875	0.081875	0.082875	0.095875	0.084875	0.085875	0.080875	0.116875	0.116875	0.108875	0.105875	0.120875	0.119875	0.079875	0.088875	0.080875	0.086875	0.085875	0.075875	0.112875	0.101875	0.122875	0.096875	0.095875	0.122875	0.110875	0.099875
0.127875	0.125875	0.151875	0.132875	0.117875	0.145875	0.116875	0.129875	0.127875	0.137875	0.110875	0.140875	0.109875	0.139875	0.142875	0.124875	0.113875	0.130875	0.106875	0.113875	0.142875	0.127875	0.112875	0.122875	0.084875	0.086875	0.099875	0.087875	0.089875	0.086875	0.121875	0.120875	0.112875	0.108875	0.130875	0.126875	0.080875	0.092875	0.085875	0.088875	0.088875	0.078875	0.115875	0.103875	0.130875	0.100875	0.099875	0.128875	0.113875	0.102875
0.131875	0.131875	0.157875	0.136875	0.122875	0.154875	0.119875	0.135875	0.134875	0.142875	0.116875	0.147875	0.112875	0.147875	0.150875	0.129875	0.117875	0.136875	0.110875	0.119875	0.151875	0.132875	0.116875	0.127875	0.087875	0.090875	0.104875	0.090875	0.088875	0.085875	0.124875	0.124875	0.118875	0.112875	0.134875	0.131875	0.084875	0.095875	0.086875	0.088875	0.090875	0.081875	0.119875	0.108875	0.136875	0.104875	0.103875	0.133875	0.116875	0.105875
0.136875	0.135875	0.160875	0.141875	0.127875	0.160875	0.125875	0.140875	0.138875	0.146875	0.118875	0.154875	0.115875	0.152875	0.157875	0.134875	0.120875	0.141875	0.113875	0.122875	0.155875	0.136875	0.119875	0.131875	0.091875	0.092875	0.106875	0.093875	0.090875	0.087875	0.127875	0.128875	0.122875	0.117875	0.139875	0.134875	0.089875	0.098875	0.087875	0.090875	0.092875	0.083875	0.123875	0.117875	0.143875	0.106875	0.106875	0.138875	0.120875	0.109875
0.143875	0.140875	0.166875	0.145875	0.133875	0.167875	0.133875	0.146875	0.144875	0.152875	0.122875	0.161875	0.119875	0.159875	0.162875	0.139875	0.124875	0.147875	0.117875	0.129875	0.163875	0.141875	0.124875	0.137875	0.094875	0.096875	0.110875	0.097875	0.095875	0.087875	0.131875	0.133875	0.129875	0.122875	0.143875	0.140875	0.094875	0.101875	0.090875	0.089875	0.096875	0.085875	0.127875	0.114875	0.150875	0.109875	0.110875	0.146875	0.124875	0.113875
0.148875	0.147875	0.173875	0.150875	0.139875	0.176875	0.139875	0.153875	0.153875	0.159875	0.130875	0.169875	0.125875	0.165875	0.171875	0.145875	0.128875	0.154875	0.121875	0.134875	0.170875	0.146875	0.128875	0.144875	0.094875	0.100875	0.115875	0.100875	0.099875	0.091875	0.134875	0.139875	0.134875	0.127875	0.149875	0.146875	0.100875	0.105875	0.094875	0.094875	0.098875	0.089875	0.132875	0.122875	0.157875	0.113875	0.114875	0.152875	0.127875	0.118875
0.154875	0.152875	0.178875	0.155875	0.143875	0.182875	0.142875	0.157875	0.159875	0.165875	0.134875	0.177875	0.129875	0.175875	0.183875	0.151875	0.131875	0.161875	0.126875	0.138875	0.187875	0.149875	0.132875	0.149875	0.097875	0.103875	0.119875	0.102875	0.103875	0.093875	0.141875	0.143875	0.139875	0.131875	0.154875	0.152875	0.103875	0.108875	0.102875	0.099875	0.100875	0.091875	0.136875	0.125875	0.163875	0.117875	0.118875	0.157875	0.131875	0.121875
0.162875	0.158875	0.185875	0.160875	0.151875	0.188875	0.148875	0.163875	0.167875	0.169875	0.141875	0.184875	0.134875	0.184875	0.188875	0.157875	0.136875	0.167875	0.131875	0.145875	0.193875	0.155875	0.136875	0.156875	0.101875	0.106875	0.122875	0.105875	0.106875	0.095875	0.143875	0.149875	0.147875	0.134875	0.159875	0.158875	0.107875	0.111875	0.092875	0.104875	0.105875	0.094875	0.140875	0.132875	0.172875	0.122875	0.123875	0.167875	0.135875	0.126875
0.171875	0.164875	0.194875	0.166875	0.157875	0.195875	0.156875	0.171875	0.176875	0.177875	0.147875	0.193875	0.138875	0.192875	0.200875	0.161875	0.143875	0.173875	0.135875	0.152875	0.203875	0.161875	0.141875	0.162875	0.103875	0.109875	0.126875	0.108875	0.109875	0.098875	0.147875	0.155875	0.153875	0.140875	0.165875	0.163875	0.111875	0.114875	0.103875	0.107875	0.109875	0.097875	0.145875	0.138875	0.180875	0.126875	0.127875	0.173875	0.139875	0.130875
0.177875	0.170875	0.213875	0.169875	0.162875	0.203875	0.162875	0.179875	0.184875	0.187875	0.153875	0.201875	0.143875	0.205875	0.215875	0.171875	0.147875	0.179875	0.140875	0.156875	0.213875	0.166875	0.144875	0.168875	0.109875	0.111875	0.129875	0.110875	0.112875	0.099875	0.153875	0.163875	0.160875	0.147875	0.171875	0.169875	0.115875	0.117875	0.111875	0.109875	0.113875	0.100875	0.149875	0.143875	0.191875	0.130875	0.131875	0.178875	0.143875	0.133875
0.185875	0.177875	0.218875	0.177875	0.167875	0.211875	0.166875	0.190875	0.192875	0.196875	0.159875	0.205875	0.149875	0.214875	0.220875	0.175875	0.151875	0.185875	0.144875	0.162875	0.219875	0.172875	0.149875	0.175875	0.113875	0.114875	0.132875	0.113875	0.115875	0.101875	0.156875	0.175875	0.167875	0.153875	0.180875	0.175875	0.119875	0.119875	0.112875	0.113875	0.116875	0.102875	0.154875	0.148875	0.199875	0.135875	0.134875	0.184875	0.147875	0.137875
0.19075	0.18775	0.23175	0.18475	0.17275	0.22675	0.17475	0.20175	0.20175	0.20475	0.16675	0.22175	0.15675	0.22175	0.23075	0.18275	0.16075	0.19275	0.14975	0.17375	0.22875	0.17875	0.15275	0.18175	0.11675	0.11575	0.13775	0.11775	0.11975	0.10375	0.16175	0.18075	0.17375	0.16175	0.19675	0.18175	0.12375	0.12375	0.11575	0.11875	0.12175	0.10575	0.16075	0.15675	0.20975	0.13975	0.13975	0.19175	0.15275	0.14175
0.19775	0.19675	0.24775	0.19175	0.17975	0.24075	0.18375	0.21475	0.21175	0.21275	0.17275	0.23275	0.16075	0.23275	0.23775	0.19275	0.16975	0.19875	0.15475	0.18675	0.23575	0.18575	0.15775	0.18875	0.12075	0.11875	0.14275	0.11975	0.12375	0.10575	0.16575	0.18475	0.17975	0.16375	0.19875	0.18775	0.12675	0.12675	0.11975	0.12075	0.12575	0.10875	0.16375	0.16175	0.21775	0.14375	0.15275	0.19875	0.15675	0.14675
0.208875	0.205875	0.264875	0.203875	0.189875	0.255875	0.188875	0.222875	0.216875	0.223875	0.179875	0.247875	0.167875	0.233875	0.242875	0.200875	0.174875	0.206875	0.162875	0.195875	0.241875	0.193875	0.161875	0.193875	0.125875	0.121875	0.145875	0.122875	0.126875	0.108875	0.176875	0.193875	0.187875	0.176875	0.207875	0.192875	0.130875	0.128875	0.123875	0.124875	0.128875	0.111875	0.172875	0.167875	0.228875	0.148875	0.160875	0.206875	0.161875	0.154875
0.223875	0.216875	0.277875	0.210875	0.197875	0.268875	0.196875	0.231875	0.227875	0.238875	0.186875	0.252875	0.177875	0.245875	0.251875	0.219875	0.180875	0.217875	0.165875	0.202875	0.249875	0.211875	0.167875	0.198875	0.129875	0.123875	0.150875	0.125875	0.131875	0.110875	0.187875	0.200875	0.193875	0.178875	0.212875	0.198875	0.134875	0.131875	0.126875	0.127875	0.133875	0.113875	0.176875	0.174875	0.236875	0.155875	0.164875	0.212875	0.164875	0.168875
0.248875	0.230875	0.291875	0.222875	0.207875	0.283875	0.204875	0.241875	0.240875	0.253875	0.193875	0.259875	0.192875	0.256875	0.260875	0.213875	0.187875	0.226875	0.176875	0.208875	0.256875	0.212875	0.175875	0.205875	0.133875	0.126875	0.158875	0.127875	0.134875	0.110875	0.187875	0.206875	0.203875	0.192875	0.222875	0.205875	0.140875	0.137875	0.130875	0.134875	0.142875	0.116875	0.192875	0.187875	0.243875	0.161875	0.168875	0.218875	0.172875	0.173875
0.290875	0.246875	0.303875	0.230875	0.217875	0.301875	0.213875	0.253875	0.254875	0.274875	0.205875	0.271875	0.196875	0.267875	0.275875	0.225875	0.195875	0.235875	0.184875	0.215875	0.263875	0.231875	0.182875	0.213875	0.137875	0.133875	0.163875	0.131875	0.138875	0.116875	0.194875	0.210875	0.211875	0.196875	0.231875	0.213875	0.146875	0.143875	0.135875	0.137875	0.150875	0.120875	0.200875	0.199875	0.252875	0.167875	0.174875	0.225875	0.181875	0.179875
0.315875	0.258875	0.310875	0.242875	0.231875	0.317875	0.222875	0.266875	0.266875	0.295875	0.213875	0.285875	0.206875	0.280875	0.284875	0.242875	0.205875	0.246875	0.192875	0.218875	0.271875	0.237875	0.189875	0.220875	0.141875	0.139875	0.168875	0.133875	0.140875	0.119875	0.200875	0.215875	0.218875	0.201875	0.241875	0.219875	0.158875	0.148875	0.137875	0.154875	0.157875	0.123875	0.210875	0.203875	0.260875	0.172875	0.181875	0.232875	0.190875	0.184875
0.324875	0.275875	0.323875	0.256875	0.253875	0.334875	0.233875	0.280875	0.288875	0.307875	0.226875	0.302875	0.210875	0.292875	0.301875	0.243875	0.213875	0.258875	0.208875	0.228875	0.282875	0.243875	0.200875	0.230875	0.146875	0.152875	0.188875	0.137875	0.144875	0.123875	0.210875	0.223875	0.222875	0.212875	0.245875	0.228875	0.161875	0.154875	0.141875	0.163875	0.163875	0.125875	0.227875	0.211875	0.269875	0.177875	0.188875	0.242875	0.198875	0.192875
0.327875	0.291875	0.345875	0.270875	0.266875	0.365875	0.246875	0.293875	0.304875	0.316875	0.237875	0.317875	0.225875	0.305875	0.312875	0.261875	0.221875	0.267875	0.218875	0.232875	0.291875	0.267875	0.207875	0.240875	0.152875	0.151875	0.189875	0.140875	0.149875	0.126875	0.217875	0.226875	0.230875	0.217875	0.253875	0.237875	0.164875	0.163875	0.145875	0.168875	0.166875	0.129875	0.228875	0.217875	0.279875	0.184875	0.192875	0.251875	0.204875	0.198875
0.335875	0.302875	0.369875	0.282875	0.280875	0.394875	0.262875	0.304875	0.317875	0.326875	0.252875	0.332875	0.228875	0.311875	0.325875	0.287875	0.229875	0.275875	0.226875	0.236875	0.301875	0.274875	0.217875	0.248875	0.156875	0.155875	0.196875	0.143875	0.157875	0.129875	0.230875	0.231875	0.237875	0.228875	0.260875	0.244875	0.172875	0.166875	0.148875	0.177875	0.170875	0.132875	0.238875	0.226875	0.292875	0.190875	0.198875	0.262875	0.213875	0.203875
0.358875	0.319875	0.395875	0.290875	0.289875	0.414875	0.288875	0.326875	0.340875	0.331875	0.266875	0.361875	0.242875	0.327875	0.344875	0.302875	0.237875	0.285875	0.234875	0.245875	0.313875	0.287875	0.226875	0.258875	0.166875	0.161875	0.201875	0.146875	0.168875	0.143875	0.234875	0.238875	0.243875	0.233875	0.269875	0.252875	0.175875	0.171875	0.154875	0.175875	0.172875	0.135875	0.248875	0.233875	0.306875	0.197875	0.205875	0.274875	0.214875	0.210875
0.378875	0.331875	0.419875	0.298875	0.298875	0.453875	0.307875	0.339875	0.360875	0.348875	0.281875	0.385875	0.253875	0.338875	0.356875	0.315875	0.241875	0.287875	0.240875	0.254875	0.326875	0.299875	0.235875	0.270875	0.177875	0.168875	0.205875	0.151875	0.171875	0.158875	0.247875	0.246875	0.251875	0.233875	0.276875	0.262875	0.185875	0.177875	0.163875	0.183875	0.170875	0.138875	0.258875	0.245875	0.321875	0.203875	0.211875	0.285875	0.225875	0.213875
0.397875	0.347875	0.443875	0.310875	0.314875	0.478875	0.332875	0.368875	0.382875	0.361875	0.297875	0.402875	0.268875	0.352875	0.377875	0.320875	0.252875	0.293875	0.252875	0.262875	0.340875	0.306875	0.239875	0.277875	0.180875	0.172875	0.209875	0.157875	0.170875	0.156875	0.255875	0.252875	0.258875	0.242875	0.282875	0.267875	0.189875	0.185875	0.180875	0.187875	0.180875	0.142875	0.269875	0.251875	0.341875	0.210875	0.218875	0.296875	0.229875	0.220875
0.424875	0.367875	0.475875	0.319875	0.331875	0.544875	0.354875	0.395875	0.410875	0.376875	0.314875	0.437875	0.280875	0.372875	0.400875	0.337875	0.262875	0.302875	0.264875	0.275875	0.352875	0.318875	0.247875	0.286875	0.184875	0.177875	0.215875	0.167875	0.178875	0.164875	0.262875	0.259875	0.266875	0.248875	0.293875	0.273875	0.198875	0.191875	0.183875	0.199875	0.187875	0.146875	0.278875	0.260875	0.369875	0.217875	0.225875	0.309875	0.236875	0.226875
0.457875	0.386875	0.519875	0.330875	0.348875	0.597875	0.379875	0.425875	0.442875	0.401875	0.332875	0.492875	0.293875	0.395875	0.421875	0.349875	0.267875	0.318875	0.273875	0.285875	0.365875	0.330875	0.253875	0.294875	0.197875	0.181875	0.221875	0.171875	0.181875	0.171875	0.272875	0.264875	0.276875	0.255875	0.300875	0.281875	0.196875	0.193875	0.189875	0.206875	0.181875	0.153875	0.289875	0.267875	0.408875	0.228875	0.229875	0.317875	0.243875	0.231875
0.493875	0.403875	0.570875	0.339875	0.366875	0.602875	0.407875	0.443875	0.470875	0.427875	0.352875	0.572875	0.309875	0.418875	0.437875	0.356875	0.276875	0.334875	0.283875	0.291875	0.378875	0.337875	0.260875	0.304875	0.214875	0.184875	0.223875	0.174875	0.192875	0.173875	0.281875	0.267875	0.283875	0.259875	0.309875	0.289875	0.211875	0.194875	0.195875	0.202875	0.185875	0.162875	0.298875	0.280875	0.441875	0.233875	0.236875	0.327875	0.253875	0.234875
0.541875	0.425875	0.581875	0.360875	0.425875	0.654875	0.441875	0.470875	0.522875	0.463875	0.376875	0.562875	0.318875	0.440875	0.465875	0.375875	0.287875	0.349875	0.296875	0.306875	0.415875	0.350875	0.269875	0.311875	0.212875	0.187875	0.228875	0.178875	0.196875	0.175875	0.287875	0.278875	0.292875	0.271875	0.317875	0.298875	0.205875	0.197875	0.200875	0.216875	0.197875	0.158875	0.309875	0.288875	0.467875	0.243875	0.249875	0.343875	0.256875	0.241875
0.571875	0.447875	0.590875	0.373875	0.456875	0.600875	0.475875	0.486875	0.569875	0.502875	0.395875	0.590875	0.330875	0.459875	0.482875	0.398875	0.298875	0.367875	0.307875	0.316875	0.428875	0.362875	0.280875	0.316875	0.227875	0.193875	0.229875	0.188875	0.200875	0.179875	0.294875	0.287875	0.305875	0.283875	0.326875	0.306875	0.225875	0.208875	0.201875	0.222875	0.198875	0.168875	0.317875	0.297875	0.502875	0.258875	0.248875	0.357875	0.263875	0.245875
0.600875	0.463875	0.605875	0.396875	0.481875	0.554875	0.501875	0.506875	0.590875	0.546875	0.427875	0.621875	0.342875	0.473875	0.499875	0.424875	0.308875	0.386875	0.314875	0.326875	0.442875	0.383875	0.288875	0.327875	0.231875	0.196875	0.233875	0.192875	0.206875	0.183875	0.301875	0.296875	0.312875	0.287875	0.337875	0.315875	0.210875	0.211875	0.207875	0.219875	0.199875	0.177875	0.324875	0.307875	0.515875	0.261875	0.257875	0.384875	0.266875	0.249875
0.590875	0.483875	0.595875	0.433875	0.491875	0.551875	0.528875	0.545875	0.595875	0.568875	0.453875	0.632875	0.348875	0.492875	0.523875	0.439875	0.317875	0.408875	0.319875	0.334875	0.457875	0.399875	0.299875	0.340875	0.233875	0.200875	0.239875	0.201875	0.214875	0.185875	0.304875	0.305875	0.313875	0.296875	0.350875	0.326875	0.224875	0.212875	0.214875	0.223875	0.209875	0.184875	0.328875	0.319875	0.526875	0.270875	0.264875	0.400875	0.272875	0.253875
0.591875	0.514875	0.596875	0.478875	0.518875	0.553875	0.574875	0.589875	0.609875	0.580875	0.491875	0.590875	0.361875	0.512875	0.568875	0.463875	0.329875	0.429875	0.327875	0.348875	0.486875	0.414875	0.306875	0.349875	0.242875	0.206875	0.243875	0.204875	0.216875	0.189875	0.312875	0.317875	0.326875	0.301875	0.363875	0.339875	0.228875	0.220875	0.218875	0.230875	0.211875	0.180875	0.335875	0.331875	0.556875	0.279875	0.277875	0.447875	0.280875	0.259875
0.558875	0.552875	0.595875	0.544875	0.547875	0.557875	0.590875	0.622875	0.604875	0.550875	0.512875	0.584875	0.380875	0.531875	0.599875	0.475875	0.342875	0.439875	0.335875	0.361875	0.501875	0.431875	0.317875	0.365875	0.253875	0.212875	0.250875	0.212875	0.219875	0.191875	0.318875	0.323875	0.328875	0.311875	0.372875	0.352875	0.243875	0.226875	0.224875	0.237875	0.219875	0.183875	0.347875	0.344875	0.566875	0.286875	0.281875	0.468875	0.295875	0.270875
0.557875	0.581875	0.598875	0.533875	0.588875	0.560875	0.593875	0.637875	0.600875	0.551875	0.555875	0.592875	0.402875	0.548875	0.606875	0.492875	0.350875	0.467875	0.344875	0.375875	0.535875	0.457875	0.326875	0.378875	0.259875	0.214875	0.253875	0.214875	0.221875	0.192875	0.323875	0.335875	0.335875	0.317875	0.404875	0.366875	0.244875	0.229875	0.227875	0.232875	0.217875	0.185875	0.354875	0.357875	0.588875	0.289875	0.288875	0.497875	0.300875	0.273875
0.558875	0.633875	0.599875	0.521875	0.654875	0.562875	0.581875	0.619875	0.599875	0.546875	0.617875	0.595875	0.411875	0.581875	0.608875	0.514875	0.363875	0.485875	0.353875	0.388875	0.564875	0.473875	0.336875	0.395875	0.263875	0.215875	0.256875	0.218875	0.224875	0.195875	0.334875	0.347875	0.345875	0.325875	0.435875	0.380875	0.253875	0.233875	0.231875	0.228875	0.223875	0.190875	0.364875	0.369875	0.612875	0.297875	0.292875	0.524875	0.306875	0.279875
0.566875	0.608875	0.599875	0.525875	0.657875	0.566875	0.589875	0.632875	0.592875	0.547875	0.616875	0.600875	0.428875	0.611875	0.609875	0.534875	0.377875	0.515875	0.365875	0.405875	0.570875	0.489875	0.344875	0.415875	0.270875	0.220875	0.261875	0.227875	0.225875	0.199875	0.340875	0.356875	0.354875	0.333875	0.442875	0.394875	0.262875	0.236875	0.230875	0.237875	0.230875	0.193875	0.375875	0.387875	0.664875	0.305875	0.299875	0.525875	0.314875	0.288875
0.562	0.61	0.605	0.543	0.651	0.567	0.576	0.616	0.597	0.547	0.644	0.605	0.452	0.625	0.607	0.562	0.393	0.557	0.383	0.428	0.609	0.518	0.355	0.435	0.267	0.226	0.266	0.231	0.231	0.202	0.348	0.372	0.362	0.341	0.473	0.408	0.265	0.241	0.232	0.238	0.236	0.201	0.39	0.406	0.693	0.316	0.309	0.541	0.318	0.294
0.571875	0.592875	0.603875	0.524875	0.624875	0.567875	0.574875	0.608875	0.597875	0.558875	0.642875	0.604875	0.476875	0.637875	0.604875	0.585875	0.399875	0.550875	0.386875	0.444875	0.654875	0.546875	0.360875	0.455875	0.282875	0.226875	0.267875	0.238875	0.237875	0.206875	0.354875	0.380875	0.375875	0.353875	0.504875	0.416875	0.274875	0.243875	0.242875	0.242875	0.237875	0.199875	0.402875	0.424875	0.701875	0.326875	0.317875	0.563875	0.326875	0.301875
0.576875	0.595875	0.603875	0.529875	0.621875	0.570875	0.571875	0.611875	0.600875	0.558875	0.600875	0.608875	0.500875	0.636875	0.611875	0.604875	0.415875	0.568875	0.405875	0.468875	0.650875	0.548875	0.370875	0.474875	0.281875	0.233875	0.276875	0.240875	0.239875	0.210875	0.364875	0.400875	0.390875	0.359875	0.518875	0.427875	0.283875	0.247875	0.247875	0.261875	0.241875	0.201875	0.418875	0.445875	0.698875	0.344875	0.326875	0.581875	0.336875	0.311875
0.579875	0.597875	0.606875	0.530875	0.595875	0.572875	0.574875	0.614875	0.601875	0.566875	0.585875	0.607875	0.535875	0.634875	0.621875	0.587875	0.438875	0.566875	0.426875	0.492875	0.661875	0.574875	0.385875	0.486875	0.271875	0.238875	0.282875	0.244875	0.242875	0.212875	0.378875	0.413875	0.408875	0.378875	0.546875	0.437875	0.288875	0.249875	0.242875	0.255875	0.247875	0.206875	0.433875	0.469875	0.700875	0.352875	0.338875	0.593875	0.343875	0.318875
0.577875	0.595875	0.606875	0.537875	0.586875	0.574875	0.576875	0.612875	0.603875	0.569875	0.590875	0.610875	0.554875	0.629875	0.618875	0.606875	0.454875	0.568875	0.441875	0.509875	0.635875	0.586875	0.397875	0.498875	0.287875	0.239875	0.282875	0.252875	0.250875	0.218875	0.387875	0.433875	0.426875	0.394875	0.552875	0.452875	0.295875	0.251875	0.240875	0.259875	0.250875	0.209875	0.449875	0.480875	0.680875	0.361875	0.342875	0.629875	0.352875	0.327875
0.580875	0.589875	0.607875	0.537875	0.588875	0.576875	0.577875	0.611875	0.603875	0.571875	0.591875	0.610875	0.573875	0.633875	0.622875	0.593875	0.467875	0.576875	0.457875	0.522875	0.624875	0.581875	0.410875	0.532875	0.296875	0.241875	0.286875	0.254875	0.253875	0.219875	0.403875	0.451875	0.436875	0.402875	0.571875	0.472875	0.300875	0.255875	0.247875	0.272875	0.253875	0.210875	0.469875	0.496875	0.668875	0.374875	0.357875	0.655875	0.361875	0.334875
0.579	0.589	0.609	0.544	0.596	0.578	0.578	0.612	0.606	0.573	0.592	0.612	0.603	0.636	0.625	0.584	0.483	0.58	0.474	0.536	0.637	0.592	0.426	0.542	0.316	0.244	0.295	0.26	0.26	0.221	0.413	0.468	0.451	0.41	0.591	0.489	0.3	0.261	0.259	0.268	0.26	0.216	0.482	0.511	0.66	0.391	0.365	0.667	0.368	0.345
0.579875	0.591875	0.609875	0.543875	0.598875	0.577875	0.578875	0.611875	0.605875	0.572875	0.594875	0.614875	0.607875	0.633875	0.625875	0.598875	0.501875	0.587875	0.496875	0.543875	0.636875	0.588875	0.443875	0.563875	0.316875	0.250875	0.297875	0.263875	0.264875	0.226875	0.417875	0.484875	0.463875	0.420875	0.602875	0.507875	0.308875	0.262875	0.266875	0.273875	0.257875	0.216875	0.503875	0.521875	0.655875	0.407875	0.378875	0.639875	0.377875	0.356875
0.580875	0.591875	0.608875	0.543875	0.600875	0.579875	0.581875	0.614875	0.607875	0.577875	0.593875	0.617875	0.605875	0.638875	0.630875	0.595875	0.514875	0.590875	0.516875	0.564875	0.643875	0.595875	0.455875	0.610875	0.314875	0.257875	0.302875	0.267875	0.267875	0.229875	0.432875	0.514875	0.479875	0.431875	0.618875	0.518875	0.314875	0.267875	0.266875	0.283875	0.253875	0.220875	0.514875	0.537875	0.659875	0.418875	0.400875	0.653875	0.387875	0.367875
0.581875	0.593875	0.612875	0.546875	0.598875	0.580875	0.580875	0.614875	0.608875	0.577875	0.590875	0.617875	0.592875	0.641875	0.631875	0.602875	0.542875	0.593875	0.539875	0.581875	0.649875	0.583875	0.469875	0.614875	0.315875	0.258875	0.307875	0.272875	0.269875	0.231875	0.444875	0.526875	0.477875	0.449875	0.657875	0.537875	0.322875	0.272875	0.266875	0.282875	0.263875	0.221875	0.550875	0.552875	0.656875	0.433875	0.417875	0.661875	0.397875	0.375875
0.579125	0.592125	0.613125	0.548125	0.599125	0.579125	0.581125	0.614125	0.610125	0.578125	0.592125	0.622125	0.595125	0.645125	0.634125	0.599125	0.565125	0.597125	0.554125	0.604125	0.649125	0.583125	0.486125	0.608125	0.324125	0.259125	0.315125	0.273125	0.274125	0.232125	0.462125	0.541125	0.480125	0.464125	0.669125	0.540125	0.329125	0.276125	0.267125	0.293125	0.267125	0.224125	0.552125	0.572125	0.665125	0.443125	0.428125	0.619125	0.408125	0.385125
0.581	0.593	0.615	0.55	0.599	0.58	0.582	0.616	0.612	0.578	0.592	0.621	0.601	0.645	0.643	0.608	0.577	0.598	0.573	0.628	0.655	0.589	0.495	0.618	0.338	0.264	0.32	0.278	0.277	0.238	0.479	0.56	0.49	0.477	0.67	0.546	0.338	0.278	0.275	0.301	0.274	0.22	0.568	0.582	0.661	0.454	0.438	0.618	0.42	0.396
0.58	0.595	0.613	0.551	0.601	0.58	0.582	0.616	0.611	0.579	0.592	0.621	0.589	0.651	0.645	0.607	0.572	0.601	0.578	0.637	0.658	0.592	0.511	0.616	0.341	0.266	0.328	0.282	0.281	0.241	0.498	0.57	0.496	0.495	0.667	0.544	0.34	0.281	0.276	0.3	0.277	0.23	0.578	0.6	0.664	0.468	0.452	0.619	0.432	0.405
0.582	0.595	0.615	0.552	0.602	0.579	0.581	0.616	0.612	0.572	0.595	0.62	0.601	0.649	0.647	0.608	0.571	0.603	0.574	0.63	0.66	0.596	0.527	0.618	0.361	0.267	0.331	0.286	0.287	0.245	0.514	0.585	0.498	0.509	0.67	0.548	0.346	0.286	0.281	0.311	0.284	0.23	0.579	0.606	0.665	0.489	0.469	0.63	0.447	0.418
0.583	0.595	0.616	0.553	0.604	0.58	0.584	0.616	0.616	0.577	0.595	0.62	0.605	0.651	0.651	0.612	0.581	0.605	0.577	0.65	0.664	0.599	0.54	0.62	0.371	0.272	0.34	0.293	0.292	0.249	0.525	0.606	0.5	0.521	0.67	0.552	0.355	0.29	0.286	0.311	0.287	0.236	0.589	0.621	0.671	0.486	0.489	0.637	0.47	0.439
0.583	0.594	0.616	0.551	0.607	0.582	0.583	0.617	0.613	0.577	0.596	0.617	0.601	0.651	0.65	0.608	0.573	0.605	0.564	0.641	0.664	0.6	0.564	0.62	0.362	0.278	0.345	0.296	0.297	0.252	0.545	0.614	0.505	0.529	0.658	0.555	0.368	0.295	0.296	0.324	0.293	0.241	0.588	0.613	0.668	0.487	0.497	0.639	0.481	0.455
0.583	0.598	0.616	0.553	0.606	0.585	0.581	0.617	0.617	0.58	0.596	0.617	0.607	0.653	0.655	0.613	0.589	0.606	0.577	0.635	0.669	0.6	0.577	0.624	0.379	0.281	0.354	0.302	0.301	0.256	0.568	0.627	0.512	0.539	0.661	0.558	0.381	0.299	0.292	0.333	0.3	0.241	0.59	0.624	0.676	0.492	0.507	0.645	0.497	0.469
0.581875	0.596875	0.612875	0.550875	0.605875	0.584875	0.580875	0.615875	0.615875	0.578875	0.595875	0.617875	0.606875	0.650875	0.653875	0.612875	0.591875	0.606875	0.579875	0.636875	0.669875	0.598875	0.581875	0.629875	0.391875	0.284875	0.362875	0.303875	0.304875	0.255875	0.585875	0.639875	0.514875	0.553875	0.665875	0.562875	0.391875	0.302875	0.298875	0.336875	0.303875	0.241875	0.592875	0.625875	0.673875	0.505875	0.531875	0.644875	0.517875	0.483875
0.578875	0.595875	0.610875	0.550875	0.603875	0.582875	0.579875	0.614875	0.615875	0.578875	0.594875	0.615875	0.603875	0.650875	0.654875	0.610875	0.594875	0.607875	0.576875	0.635875	0.671875	0.596875	0.586875	0.631875	0.398875	0.289875	0.371875	0.306875	0.308875	0.258875	0.574875	0.656875	0.518875	0.566875	0.667875	0.563875	0.404875	0.305875	0.296875	0.346875	0.305875	0.248875	0.582875	0.629875	0.675875	0.500875	0.534875	0.646875	0.537875	0.493875
0.581	0.598	0.612	0.549	0.603	0.582	0.578	0.615	0.617	0.579	0.595	0.613	0.606	0.65	0.657	0.613	0.599	0.609	0.575	0.643	0.672	0.6	0.594	0.633	0.408	0.294	0.382	0.312	0.312	0.265	0.586	0.673	0.525	0.584	0.673	0.565	0.414	0.31	0.306	0.356	0.313	0.248	0.593	0.633	0.678	0.51	0.567	0.649	0.543	0.511
0.584	0.596	0.612	0.548	0.605	0.584	0.582	0.614	0.615	0.576	0.594	0.612	0.609	0.648	0.657	0.613	0.603	0.608	0.579	0.647	0.675	0.601	0.604	0.634	0.423	0.298	0.393	0.317	0.319	0.27	0.58	0.685	0.526	0.576	0.677	0.567	0.423	0.318	0.312	0.358	0.318	0.252	0.599	0.631	0.678	0.522	0.575	0.65	0.56	0.53
0.583	0.595	0.608	0.548	0.605	0.582	0.577	0.615	0.613	0.578	0.595	0.614	0.604	0.649	0.657	0.614	0.606	0.608	0.581	0.651	0.673	0.602	0.61	0.637	0.428	0.302	0.401	0.322	0.323	0.27	0.581	0.693	0.531	0.58	0.681	0.569	0.438	0.323	0.317	0.378	0.324	0.257	0.602	0.635	0.676	0.519	0.571	0.654	0.566	0.536
0.584	0.596	0.607	0.548	0.605	0.585	0.564	0.614	0.613	0.581	0.595	0.615	0.608	0.648	0.657	0.611	0.611	0.607	0.58	0.654	0.674	0.6	0.608	0.638	0.437	0.307	0.409	0.327	0.329	0.278	0.582	0.695	0.534	0.578	0.683	0.568	0.442	0.326	0.323	0.39	0.33	0.26	0.6	0.637	0.675	0.518	0.585	0.654	0.568	0.551
0.583875	0.592875	0.611875	0.549875	0.600875	0.583875	0.572875	0.611875	0.611875	0.576875	0.593875	0.611875	0.607875	0.644875	0.656875	0.611875	0.609875	0.606875	0.584875	0.653875	0.672875	0.601875	0.608875	0.638875	0.444875	0.307875	0.414875	0.330875	0.332875	0.277875	0.590875	0.692875	0.533875	0.577875	0.682875	0.569875	0.453875	0.328875	0.325875	0.392875	0.337875	0.261875	0.602875	0.635875	0.671875	0.520875	0.589875	0.654875	0.565875	0.562875
0.581875	0.590875	0.613875	0.545875	0.600875	0.584875	0.574875	0.610875	0.611875	0.574875	0.593875	0.606875	0.604875	0.644875	0.656875	0.609875	0.608875	0.607875	0.580875	0.655875	0.673875	0.599875	0.610875	0.639875	0.457875	0.314875	0.427875	0.331875	0.338875	0.280875	0.583875	0.692875	0.539875	0.584875	0.681875	0.569875	0.468875	0.333875	0.331875	0.401875	0.342875	0.264875	0.602875	0.637875	0.673875	0.526875	0.593875	0.654875	0.565875	0.576875
0.57975	0.58975	0.60775	0.54675	0.60075	0.58375	0.57875	0.61375	0.61175	0.57575	0.59375	0.61175	0.60775	0.64575	0.65975	0.61075	0.61075	0.60575	0.57975	0.65975	0.67475	0.59975	0.61075	0.63975	0.47475	0.32075	0.45175	0.34175	0.34375	0.28675	0.58675	0.69475	0.54475	0.58575	0.68175	0.56775	0.48675	0.33975	0.34075	0.41475	0.35175	0.26775	0.60375	0.63775	0.67375	0.52975	0.59775	0.65475	0.57275	0.59875
0.577	0.589	0.605	0.548	0.597	0.583	0.576	0.61	0.609	0.575	0.593	0.615	0.606	0.643	0.657	0.612	0.61	0.607	0.583	0.657	0.674	0.599	0.614	0.641	0.484	0.326	0.453	0.343	0.348	0.289	0.59	0.69	0.545	0.59	0.684	0.569	0.492	0.344	0.347	0.422	0.354	0.272	0.605	0.64	0.673	0.533	0.604	0.656	0.572	0.599
0.583875	0.586875	0.605875	0.550875	0.598875	0.581875	0.572875	0.607875	0.610875	0.578875	0.592875	0.610875	0.602875	0.641875	0.656875	0.609875	0.608875	0.606875	0.581875	0.657875	0.671875	0.597875	0.615875	0.639875	0.491875	0.325875	0.461875	0.345875	0.351875	0.290875	0.598875	0.690875	0.545875	0.590875	0.681875	0.567875	0.503875	0.348875	0.358875	0.429875	0.360875	0.274875	0.606875	0.638875	0.669875	0.535875	0.604875	0.653875	0.576875	0.608875
0.58475	0.58475	0.60575	0.54775	0.59675	0.57975	0.57075	0.60475	0.60775	0.57475	0.58975	0.61475	0.60575	0.63975	0.65575	0.61075	0.60975	0.60575	0.58175	0.65675	0.67275	0.59975	0.61875	0.64175	0.50075	0.33275	0.46975	0.34875	0.35575	0.29275	0.59775	0.69175	0.54875	0.59675	0.68175	0.56875	0.51375	0.35275	0.36175	0.43775	0.36275	0.27875	0.60675	0.63675	0.67175	0.53975	0.61375	0.65275	0.57775	0.61575
0.582875	0.582875	0.608875	0.546875	0.595875	0.583875	0.570875	0.607875	0.608875	0.573875	0.590875	0.612875	0.607875	0.637875	0.653875	0.605875	0.608875	0.604875	0.579875	0.659875	0.670875	0.597875	0.617875	0.641875	0.512875	0.340875	0.479875	0.352875	0.364875	0.300875	0.601875	0.693875	0.552875	0.595875	0.683875	0.568875	0.526875	0.358875	0.369875	0.447875	0.369875	0.283875	0.600875	0.636875	0.670875	0.539875	0.615875	0.654875	0.578875	0.633875
0.58375	0.58375	0.60475	0.54875	0.59175	0.58575	0.57275	0.60675	0.61175	0.57975	0.58975	0.61575	0.60175	0.63675	0.65375	0.60375	0.60975	0.60375	0.57775	0.65875	0.66975	0.59475	0.61775	0.64175	0.51975	0.34275	0.49375	0.36475	0.36975	0.30875	0.59975	0.69675	0.55375	0.60175	0.68075	0.56775	0.53675	0.36475	0.38175	0.45475	0.37175	0.28675	0.60475	0.63575	0.67075	0.54475	0.61675	0.65375	0.58175	0.65375
0.585875	0.583875	0.609875	0.550875	0.592875	0.586875	0.574875	0.606875	0.610875	0.578875	0.588875	0.610875	0.605875	0.638875	0.653875	0.603875	0.611875	0.601875	0.583875	0.657875	0.669875	0.597875	0.619875	0.642875	0.524875	0.348875	0.504875	0.369875	0.374875	0.311875	0.599875	0.695875	0.551875	0.601875	0.679875	0.568875	0.546875	0.370875	0.387875	0.458875	0.379875	0.291875	0.600875	0.637875	0.668875	0.542875	0.621875	0.652875	0.580875	0.656875
0.58775	0.58475	0.61075	0.54975	0.59175	0.58175	0.57775	0.60575	0.60875	0.57475	0.58675	0.60975	0.60475	0.63775	0.65375	0.60875	0.60975	0.59975	0.57775	0.65575	0.66975	0.59975	0.61675	0.64075	0.53975	0.35475	0.51675	0.37175	0.37475	0.31275	0.59775	0.69575	0.55775	0.60475	0.67875	0.56675	0.55175	0.37675	0.39575	0.46775	0.38775	0.29775	0.60075	0.63575	0.67075	0.54475	0.62375	0.65275	0.58075	0.65675
0.585875	0.585875	0.611875	0.550875	0.592875	0.583875	0.577875	0.605875	0.609875	0.575875	0.585875	0.605875	0.609875	0.638875	0.651875	0.608875	0.607875	0.596875	0.581875	0.657875	0.670875	0.598875	0.616875	0.639875	0.547875	0.360875	0.521875	0.378875	0.382875	0.317875	0.599875	0.697875	0.552875	0.602875	0.678875	0.566875	0.569875	0.383875	0.400875	0.477875	0.408875	0.300875	0.600875	0.633875	0.671875	0.547875	0.627875	0.650875	0.578875	0.657875
0.58775	0.58575	0.60875	0.55275	0.58875	0.58175	0.57875	0.60175	0.60675	0.57575	0.58875	0.61075	0.60375	0.63675	0.65175	0.61075	0.60875	0.59475	0.58375	0.65575	0.66975	0.59675	0.61775	0.64075	0.56375	0.36575	0.52375	0.38375	0.38675	0.32275	0.59975	0.69575	0.55675	0.60675	0.67775	0.56375	0.56875	0.38775	0.40675	0.48375	0.40975	0.30475	0.60075	0.63075	0.66875	0.54775	0.63175	0.65175	0.57975	0.65875
0.585875	0.580875	0.607875	0.549875	0.587875	0.580875	0.571875	0.598875	0.605875	0.573875	0.587875	0.605875	0.599875	0.631875	0.648875	0.605875	0.606875	0.592875	0.580875	0.654875	0.668875	0.593875	0.616875	0.641875	0.567875	0.375875	0.530875	0.388875	0.389875	0.331875	0.597875	0.695875	0.554875	0.602875	0.676875	0.559875	0.577875	0.393875	0.424875	0.492875	0.417875	0.306875	0.597875	0.631875	0.664875	0.548875	0.630875	0.651875	0.580875	0.661875
0.587875	0.579875	0.607875	0.549875	0.587875	0.579875	0.567875	0.598875	0.609875	0.573875	0.584875	0.603875	0.601875	0.630875	0.649875	0.607875	0.608875	0.591875	0.573875	0.654875	0.667875	0.593875	0.615875	0.641875	0.583875	0.382875	0.541875	0.396875	0.404875	0.338875	0.601875	0.695875	0.557875	0.606875	0.675875	0.560875	0.581875	0.402875	0.438875	0.497875	0.428875	0.313875	0.597875	0.632875	0.663875	0.549875	0.630875	0.649875	0.578875	0.663875
0.58675	0.58275	0.60775	0.54975	0.58575	0.57775	0.56675	0.59775	0.60575	0.57775	0.58475	0.60375	0.60075	0.63175	0.64975	0.60875	0.60975	0.59375	0.57775	0.65275	0.66575	0.59375	0.61575	0.64175	0.60075	0.39275	0.55475	0.40175	0.41675	0.34575	0.59475	0.69475	0.55875	0.60475	0.67275	0.55975	0.59075	0.41275	0.45175	0.50275	0.43775	0.32275	0.59775	0.62975	0.66675	0.55075	0.63375	0.64875	0.58175	0.66275
0.58425	0.58525	0.60625	0.54925	0.58325	0.57525	0.57125	0.59725	0.60525	0.57625	0.58225	0.60525	0.59625	0.62725	0.64925	0.61025	0.60725	0.59525	0.57525	0.64925	0.66325	0.59525	0.61425	0.64225	0.58225	0.39825	0.56625	0.40125	0.42625	0.34825	0.59925	0.69425	0.55925	0.60825	0.67025	0.56025	0.60725	0.41725	0.45825	0.50825	0.45225	0.32825	0.59725	0.63425	0.66725	0.55225	0.63325	0.64825	0.58225	0.66425
0.581875	0.582875	0.605875	0.548875	0.582875	0.574875	0.574875	0.590875	0.601875	0.573875	0.581875	0.604875	0.601875	0.627875	0.648875	0.610875	0.607875	0.595875	0.569875	0.647875	0.663875	0.592875	0.613875	0.641875	0.602875	0.406875	0.567875	0.403875	0.431875	0.351875	0.598875	0.690875	0.559875	0.606875	0.668875	0.561875	0.598875	0.420875	0.466875	0.514875	0.449875	0.329875	0.596875	0.626875	0.666875	0.551875	0.634875	0.646875	0.577875	0.663875
0.581875	0.584875	0.604875	0.549875	0.581875	0.576875	0.573875	0.592875	0.603875	0.573875	0.581875	0.605875	0.600875	0.625875	0.648875	0.613875	0.603875	0.595875	0.570875	0.648875	0.664875	0.590875	0.611875	0.641875	0.578875	0.407875	0.579875	0.410875	0.440875	0.358875	0.596875	0.691875	0.562875	0.598875	0.668875	0.561875	0.598875	0.426875	0.480875	0.519875	0.460875	0.339875	0.596875	0.625875	0.665875	0.552875	0.632875	0.645875	0.581875	0.664875
0.582125	0.584125	0.608125	0.548125	0.582125	0.580125	0.576125	0.594125	0.605125	0.571125	0.584125	0.606125	0.602125	0.630125	0.652125	0.614125	0.609125	0.591125	0.573125	0.651125	0.667125	0.596125	0.611125	0.639125	0.593125	0.418125	0.583125	0.423125	0.454125	0.363125	0.590125	0.690125	0.565125	0.606125	0.668125	0.561125	0.591125	0.432125	0.490125	0.524125	0.464125	0.347125	0.597125	0.631125	0.665125	0.555125	0.637125	0.646125	0.579125	0.667125
0.58275	0.58075	0.60875	0.54775	0.58375	0.57875	0.57275	0.59275	0.60275	0.57175	0.58475	0.59975	0.60575	0.62675	0.64475	0.60775	0.60975	0.58975	0.58075	0.64775	0.66875	0.59675	0.61075	0.63875	0.59575	0.41775	0.58575	0.42875	0.46175	0.36875	0.59575	0.68775	0.56375	0.60575	0.66675	0.55775	0.58375	0.43875	0.50175	0.52875	0.46975	0.35175	0.59875	0.62675	0.66175	0.55575	0.63775	0.64675	0.57875	0.66675
0.584	0.581	0.611	0.547	0.581	0.579	0.575	0.588	0.601	0.573	0.583	0.6	0.601	0.625	0.643	0.603	0.609	0.59	0.58	0.645	0.664	0.593	0.612	0.638	0.596	0.423	0.59	0.434	0.469	0.373	0.59	0.686	0.565	0.604	0.664	0.556	0.608	0.443	0.514	0.538	0.479	0.359	0.594	0.63	0.66	0.557	0.64	0.644	0.577	0.666
0.584	0.577	0.606	0.548	0.581	0.576	0.573	0.585	0.599	0.572	0.581	0.599	0.593	0.627	0.644	0.599	0.607	0.592	0.586	0.644	0.664	0.592	0.612	0.639	0.589	0.429	0.602	0.443	0.482	0.381	0.589	0.686	0.565	0.603	0.664	0.564	0.608	0.451	0.522	0.538	0.493	0.366	0.591	0.626	0.66	0.559	0.64	0.645	0.572	0.667
0.58375	0.57275	0.60775	0.54875	0.57775	0.57175	0.57075	0.58875	0.59975	0.57075	0.57875	0.59875	0.59275	0.62675	0.64575	0.59875	0.60775	0.59175	0.58175	0.64275	0.66375	0.59675	0.60875	0.63875	0.58875	0.43375	0.60875	0.45175	0.49375	0.38775	0.59075	0.68175	0.56375	0.60375	0.66075	0.56475	0.60575	0.45675	0.53475	0.53475	0.49775	0.37075	0.59475	0.62675	0.65575	0.55975	0.64175	0.64375	0.57275	0.66575
0.585875	0.573875	0.607875	0.548875	0.578875	0.573875	0.567875	0.586875	0.600875	0.570875	0.581875	0.593875	0.595875	0.625875	0.642875	0.598875	0.608875	0.590875	0.580875	0.639875	0.662875	0.590875	0.607875	0.637875	0.598875	0.441875	0.617875	0.459875	0.503875	0.388875	0.590875	0.680875	0.563875	0.603875	0.660875	0.561875	0.608875	0.464875	0.541875	0.537875	0.507875	0.384875	0.592875	0.624875	0.653875	0.560875	0.642875	0.643875	0.569875	0.665875
0.583875	0.572875	0.608875	0.547875	0.578875	0.573875	0.565875	0.588875	0.602875	0.570875	0.576875	0.593875	0.599875	0.623875	0.643875	0.602875	0.606875	0.589875	0.580875	0.637875	0.664875	0.593875	0.605875	0.635875	0.599875	0.446875	0.628875	0.470875	0.510875	0.396875	0.587875	0.678875	0.562875	0.605875	0.656875	0.559875	0.612875	0.474875	0.547875	0.545875	0.508875	0.386875	0.593875	0.624875	0.654875	0.558875	0.641875	0.641875	0.567875	0.665875
0.583125	0.574125	0.608125	0.549125	0.578125	0.573125	0.571125	0.581125	0.605125	0.571125	0.576125	0.599125	0.595125	0.623125	0.640125	0.607125	0.606125	0.589125	0.580125	0.639125	0.665125	0.593125	0.606125	0.636125	0.595125	0.450125	0.635125	0.475125	0.517125	0.406125	0.584125	0.676125	0.568125	0.603125	0.657125	0.560125	0.611125	0.482125	0.554125	0.541125	0.511125	0.383125	0.591125	0.623125	0.654125	0.558125	0.641125	0.638125	0.570125	0.664125
0.584	0.575	0.61	0.55	0.577	0.574	0.573	0.58	0.602	0.573	0.573	0.594	0.592	0.618	0.639	0.606	0.606	0.587	0.58	0.637	0.662	0.591	0.608	0.632	0.592	0.456	0.639	0.486	0.523	0.408	0.587	0.672	0.571	0.603	0.655	0.561	0.612	0.488	0.565	0.541	0.516	0.392	0.589	0.621	0.651	0.559	0.64	0.642	0.568	0.662
0.583	0.573	0.608	0.549	0.573	0.572	0.577	0.581	0.605	0.574	0.574	0.593	0.592	0.619	0.637	0.6	0.606	0.588	0.579	0.637	0.662	0.593	0.606	0.628	0.595	0.46	0.644	0.488	0.531	0.423	0.587	0.672	0.571	0.604	0.652	0.563	0.616	0.493	0.574	0.546	0.52	0.399	0.59	0.616	0.649	0.561	0.639	0.639	0.57	0.662
0.582125	0.575125	0.608125	0.551125	0.575125	0.572125	0.575125	0.590125	0.608125	0.575125	0.578125	0.592125	0.600125	0.619125	0.643125	0.602125	0.603125	0.589125	0.577125	0.637125	0.662125	0.593125	0.604125	0.628125	0.596125	0.465125	0.649125	0.496125	0.539125	0.436125	0.588125	0.671125	0.568125	0.605125	0.656125	0.565125	0.619125	0.502125	0.579125	0.550125	0.523125	0.406125	0.591125	0.619125	0.650125	0.562125	0.640125	0.636125	0.571125	0.663125
0.581875	0.574875	0.607875	0.550875	0.573875	0.570875	0.577875	0.577875	0.604875	0.574875	0.573875	0.592875	0.601875	0.618875	0.643875	0.598875	0.605875	0.589875	0.574875	0.635875	0.661875	0.588875	0.603875	0.628875	0.594875	0.470875	0.653875	0.503875	0.546875	0.438875	0.593875	0.669875	0.561875	0.603875	0.653875	0.561875	0.620875	0.508875	0.585875	0.551875	0.525875	0.417875	0.589875	0.621875	0.651875	0.559875	0.639875	0.637875	0.571875	0.659875
0.58525	0.57825	0.61025	0.55225	0.57525	0.57425	0.57925	0.58525	0.60225	0.57625	0.57525	0.59725	0.60025	0.62025	0.64125	0.60125	0.60625	0.59225	0.57825	0.63525	0.66125	0.59225	0.60225	0.62525	0.60425	0.47925	0.65125	0.50725	0.55025	0.44325	0.59225	0.66625	0.56725	0.60625	0.65125	0.55725	0.62025	0.51925	0.59125	0.55525	0.53225	0.42325	0.58925	0.62025	0.65525	0.55925	0.64125	0.63825	0.57025	0.66025
0.583875	0.573875	0.608875	0.551875	0.574875	0.569875	0.576875	0.578875	0.599875	0.575875	0.570875	0.594875	0.594875	0.611875	0.637875	0.593875	0.600875	0.592875	0.576875	0.635875	0.658875	0.590875	0.600875	0.624875	0.608875	0.483875	0.651875	0.512875	0.555875	0.449875	0.585875	0.663875	0.566875	0.601875	0.649875	0.561875	0.618875	0.524875	0.596875	0.558875	0.534875	0.430875	0.587875	0.611875	0.649875	0.558875	0.640875	0.638875	0.569875	0.657875
0.583125	0.575125	0.610125	0.552125	0.576125	0.571125	0.579125	0.580125	0.603125	0.576125	0.577125	0.595125	0.596125	0.615125	0.639125	0.593125	0.601125	0.588125	0.575125	0.633125	0.661125	0.595125	0.603125	0.623125	0.602125	0.488125	0.655125	0.527125	0.564125	0.455125	0.583125	0.663125	0.571125	0.600125	0.651125	0.565125	0.619125	0.532125	0.604125	0.562125	0.545125	0.439125	0.589125	0.614125	0.645125	0.561125	0.641125	0.639125	0.568125	0.656125
0.583	0.576	0.612	0.554	0.575	0.571	0.578	0.581	0.606	0.577	0.573	0.596	0.596	0.612	0.634	0.595	0.602	0.588	0.578	0.632	0.664	0.59	0.603	0.626	0.608	0.493	0.663	0.527	0.568	0.467	0.583	0.663	0.573	0.603	0.646	0.566	0.623	0.535	0.61	0.564	0.545	0.448	0.586	0.617	0.644	0.561	0.642	0.639	0.568	0.656
0.585	0.575	0.611	0.554	0.573	0.572	0.574	0.583	0.603	0.578	0.572	0.592	0.598	0.615	0.637	0.6	0.602	0.587	0.582	0.634	0.662	0.589	0.602	0.626	0.607	0.5	0.664	0.535	0.573	0.477	0.585	0.66	0.568	0.599	0.644	0.564	0.624	0.541	0.614	0.564	0.547	0.453	0.589	0.612	0.643	0.558	0.643	0.639	0.571	0.653
0.586125	0.576125	0.612125	0.555125	0.573125	0.572125	0.573125	0.579125	0.601125	0.579125	0.571125	0.594125	0.594125	0.615125	0.636125	0.604125	0.601125	0.588125	0.578125	0.632125	0.661125	0.589125	0.597125	0.624125	0.606125	0.503125	0.668125	0.541125	0.578125	0.482125	0.583125	0.657125	0.572125	0.599125	0.646125	0.560125	0.628125	0.546125	0.619125	0.564125	0.548125	0.459125	0.588125	0.606125	0.643125	0.558125	0.639125	0.640125	0.572125	0.650125
0.585125	0.576125	0.613125	0.556125	0.575125	0.573125	0.574125	0.579125	0.601125	0.580125	0.571125	0.594125	0.589125	0.611125	0.635125	0.604125	0.595125	0.592125	0.575125	0.631125	0.660125	0.585125	0.599125	0.624125	0.597125	0.509125	0.669125	0.543125	0.582125	0.488125	0.587125	0.654125	0.573125	0.599125	0.644125	0.561125	0.625125	0.553125	0.629125	0.565125	0.557125	0.466125	0.587125	0.609125	0.644125	0.558125	0.640125	0.639125	0.569125	0.649125
0.584125	0.577125	0.614125	0.558125	0.575125	0.574125	0.575125	0.580125	0.602125	0.583125	0.569125	0.597125	0.593125	0.611125	0.638125	0.596125	0.598125	0.594125	0.575125	0.633125	0.661125	0.587125	0.596125	0.621125	0.599125	0.511125	0.670125	0.546125	0.588125	0.496125	0.590125	0.651125	0.572125	0.602125	0.641125	0.561125	0.622125	0.559125	0.632125	0.568125	0.560125	0.472125	0.588125	0.611125	0.645125	0.558125	0.642125	0.639125	0.571125	0.645125
0.584125	0.579125	0.615125	0.560125	0.574125	0.575125	0.574125	0.582125	0.603125	0.584125	0.566125	0.594125	0.598125	0.611125	0.635125	0.597125	0.598125	0.591125	0.574125	0.632125	0.663125	0.585125	0.595125	0.622125	0.601125	0.517125	0.673125	0.554125	0.590125	0.501125	0.586125	0.654125	0.573125	0.601125	0.642125	0.564125	0.622125	0.565125	0.637125	0.569125	0.563125	0.477125	0.587125	0.605125	0.642125	0.558125	0.639125	0.638125	0.570125	0.645125
0.587	0.578	0.615	0.561	0.575	0.576	0.574	0.582	0.605	0.586	0.567	0.597	0.597	0.612	0.634	0.596	0.599	0.587	0.575	0.635	0.663	0.586	0.595	0.625	0.604	0.522	0.676	0.558	0.593	0.508	0.584	0.655	0.573	0.597	0.644	0.567	0.621	0.576	0.643	0.57	0.571	0.484	0.589	0.609	0.64	0.558	0.64	0.637	0.573	0.642
0.587125	0.580125	0.618125	0.562125	0.576125	0.578125	0.574125	0.584125	0.606125	0.587125	0.567125	0.595125	0.598125	0.609125	0.632125	0.596125	0.599125	0.589125	0.575125	0.633125	0.664125	0.587125	0.593125	0.624125	0.604125	0.526125	0.677125	0.565125	0.597125	0.513125	0.584125	0.655125	0.571125	0.596125	0.644125	0.566125	0.623125	0.582125	0.646125	0.571125	0.574125	0.490125	0.590125	0.607125	0.640125	0.559125	0.638125	0.638125	0.571125	0.645125
0.588125	0.581125	0.619125	0.561125	0.578125	0.578125	0.576125	0.583125	0.607125	0.587125	0.569125	0.597125	0.596125	0.612125	0.638125	0.592125	0.593125	0.589125	0.576125	0.635125	0.663125	0.587125	0.591125	0.623125	0.602125	0.531125	0.681125	0.559125	0.600125	0.521125	0.585125	0.653125	0.573125	0.595125	0.642125	0.565125	0.622125	0.585125	0.651125	0.576125	0.578125	0.498125	0.591125	0.606125	0.642125	0.556125	0.635125	0.639125	0.570125	0.646125
0.586125	0.581125	0.618125	0.563125	0.578125	0.579125	0.577125	0.585125	0.610125	0.587125	0.570125	0.595125	0.599125	0.613125	0.634125	0.593125	0.596125	0.592125	0.572125	0.631125	0.663125	0.589125	0.590125	0.625125	0.597125	0.539125	0.681125	0.565125	0.603125	0.526125	0.582125	0.654125	0.576125	0.595125	0.639125	0.559125	0.622125	0.595125	0.654125	0.577125	0.580125	0.500125	0.591125	0.606125	0.638125	0.557125	0.635125	0.640125	0.570125	0.644125
0.587125	0.581125	0.616125	0.564125	0.581125	0.580125	0.582125	0.591125	0.609125	0.588125	0.571125	0.597125	0.594125	0.610125	0.636125	0.595125	0.596125	0.594125	0.575125	0.630125	0.664125	0.591125	0.591125	0.626125	0.598125	0.546125	0.681125	0.570125	0.603125	0.529125	0.583125	0.652125	0.573125	0.597125	0.638125	0.562125	0.623125	0.594125	0.651125	0.580125	0.584125	0.505125	0.592125	0.607125	0.634125	0.556125	0.638125	0.640125	0.573125	0.645125
0.589125	0.582125	0.618125	0.565125	0.582125	0.581125	0.583125	0.594125	0.612125	0.589125	0.572125	0.597125	0.597125	0.610125	0.636125	0.596125	0.594125	0.593125	0.576125	0.634125	0.665125	0.583125	0.590125	0.626125	0.597125	0.550125	0.683125	0.563125	0.602125	0.536125	0.582125	0.654125	0.572125	0.598125	0.639125	0.566125	0.624125	0.597125	0.653125	0.580125	0.588125	0.510125	0.589125	0.605125	0.637125	0.556125	0.638125	0.641125	0.570125	0.644125
0.589	0.58	0.617	0.566	0.582	0.582	0.584	0.592	0.611	0.59	0.574	0.598	0.598	0.611	0.637	0.597	0.596	0.593	0.581	0.636	0.666	0.582	0.591	0.626	0.597	0.557	0.685	0.564	0.606	0.54	0.582	0.652	0.573	0.595	0.642	0.565	0.619	0.6	0.657	0.581	0.591	0.514	0.59	0.606	0.637	0.559	0.638	0.642	0.568	0.639
0.59025	0.58025	0.62025	0.56725	0.58125	0.58225	0.58525	0.59025	0.61325	0.59125	0.57525	0.59925	0.59925	0.61225	0.63725	0.60025	0.59625	0.59325	0.57825	0.63625	0.66625	0.58125	0.58825	0.62625	0.59925	0.56325	0.68625	0.57225	0.60525	0.54625	0.58125	0.65125	0.57325	0.59425	0.64225	0.56725	0.62025	0.60425	0.65825	0.58225	0.59625	0.51825	0.58825	0.60625	0.63625	0.55625	0.64225	0.64125	0.56825	0.63425
0.591	0.58	0.619	0.568	0.585	0.582	0.586	0.588	0.615	0.593	0.576	0.598	0.589	0.615	0.638	0.599	0.598	0.591	0.577	0.636	0.666	0.585	0.59	0.63	0.6	0.567	0.686	0.575	0.606	0.549	0.58	0.653	0.574	0.596	0.641	0.569	0.62	0.608	0.658	0.581	0.597	0.523	0.586	0.604	0.635	0.556	0.642	0.641	0.57	0.636
0.59125	0.57925	0.62025	0.56825	0.58225	0.58425	0.58725	0.58825	0.61625	0.59325	0.57625	0.60025	0.59125	0.61425	0.63925	0.59925	0.59725	0.59625	0.57825	0.63725	0.66625	0.58925	0.58925	0.63025	0.59925	0.57125	0.68525	0.57425	0.60625	0.55225	0.57525	0.65225	0.57225	0.59725	0.63825	0.56725	0.61625	0.61325	0.65925	0.58225	0.59925	0.52625	0.58725	0.60525	0.63625	0.55625	0.64325	0.64225	0.57025	0.63225
0.591	0.579	0.619	0.568	0.582	0.583	0.588	0.589	0.618	0.594	0.578	0.6	0.588	0.614	0.639	0.601	0.597	0.596	0.579	0.637	0.666	0.589	0.59	0.632	0.598	0.575	0.686	0.576	0.608	0.555	0.578	0.651	0.573	0.596	0.637	0.566	0.618	0.618	0.66	0.581	0.601	0.529	0.589	0.607	0.637	0.555	0.645	0.642	0.571	0.634
0.59225	0.58025	0.62025	0.56925	0.58325	0.58425	0.58825	0.59225	0.62025	0.59425	0.58025	0.60025	0.58825	0.61625	0.64025	0.60325	0.59725	0.59625	0.58125	0.63925	0.66625	0.59025	0.58825	0.63425	0.59825	0.57725	0.68925	0.57525	0.61125	0.56125	0.57925	0.64925	0.57225	0.59625	0.64025	0.56625	0.61925	0.62025	0.66125	0.58325	0.60325	0.53225	0.59225	0.60425	0.63725	0.55725	0.64525	0.64225	0.57025	0.63125
0.591375	0.582375	0.619375	0.567375	0.584375	0.583375	0.586375	0.590375	0.618375	0.595375	0.578375	0.600375	0.591375	0.614375	0.639375	0.603375	0.595375	0.599375	0.582375	0.639375	0.667375	0.589375	0.591375	0.635375	0.595375	0.574375	0.691375	0.577375	0.614375	0.581375	0.578375	0.648375	0.572375	0.597375	0.637375	0.567375	0.619375	0.621375	0.672375	0.585375	0.603375	0.534375	0.592375	0.603375	0.640375	0.556375	0.646375	0.642375	0.569375	0.630375
0.59225	0.58425	0.62025	0.56725	0.58825	0.58525	0.58725	0.59325	0.62125	0.59625	0.58225	0.60125	0.59125	0.61725	0.64025	0.60325	0.59925	0.59725	0.58425	0.64225	0.66825	0.58825	0.59125	0.63625	0.60025	0.58425	0.69425	0.58325	0.61325	0.56825	0.58325	0.65025	0.57125	0.59525	0.63925	0.57325	0.61325	0.62625	0.66725	0.58425	0.60825	0.54125	0.59725	0.60525	0.63525	0.55725	0.64725	0.64425	0.57125	0.63325
0.592125	0.584125	0.621125	0.567125	0.592125	0.584125	0.587125	0.594125	0.624125	0.596125	0.580125	0.601125	0.589125	0.613125	0.643125	0.605125	0.599125	0.599125	0.585125	0.638125	0.671125	0.590125	0.594125	0.633125	0.600125	0.585125	0.691125	0.582125	0.616125	0.573125	0.585125	0.649125	0.574125	0.595125	0.641125	0.575125	0.613125	0.625125	0.662125	0.586125	0.606125	0.543125	0.599125	0.604125	0.639125	0.558125	0.645125	0.646125	0.571125	0.634125
0.592	0.584	0.621	0.568	0.593	0.585	0.587	0.595	0.624	0.597	0.583	0.601	0.59	0.613	0.644	0.602	0.599	0.6	0.583	0.639	0.67	0.591	0.594	0.629	0.598	0.589	0.691	0.58	0.613	0.576	0.584	0.649	0.573	0.595	0.639	0.576	0.607	0.626	0.662	0.587	0.609	0.543	0.6	0.604	0.639	0.557	0.647	0.648	0.573	0.628
0.591375	0.585375	0.621375	0.568375	0.594375	0.586375	0.587375	0.596375	0.625375	0.598375	0.585375	0.603375	0.591375	0.616375	0.644375	0.604375	0.598375	0.599375	0.583375	0.641375	0.670375	0.591375	0.593375	0.633375	0.600375	0.589375	0.690375	0.578375	0.615375	0.582375	0.583375	0.651375	0.574375	0.596375	0.637375	0.574375	0.614375	0.626375	0.662375	0.587375	0.610375	0.545375	0.601375	0.606375	0.639375	0.561375	0.647375	0.647375	0.573375	0.628375
0.591	0.585	0.621	0.568	0.594	0.586	0.588	0.597	0.625	0.597	0.587	0.603	0.596	0.616	0.646	0.605	0.597	0.601	0.585	0.641	0.671	0.592	0.595	0.635	0.6	0.592	0.691	0.583	0.612	0.584	0.584	0.648	0.574	0.596	0.639	0.576	0.619	0.626	0.664	0.588	0.609	0.545	0.601	0.608	0.638	0.563	0.647	0.648	0.575	0.628
0.59125	0.58525	0.62225	0.56825	0.59425	0.58725	0.58825	0.59925	0.62825	0.59825	0.58625	0.60325	0.58825	0.61725	0.64625	0.60525	0.59725	0.60225	0.58725	0.64425	0.67225	0.59325	0.59225	0.63825	0.60625	0.59225	0.69325	0.58625	0.61325	0.58925	0.58525	0.64625	0.57325	0.59625	0.63725	0.57525	0.62025	0.62625	0.66425	0.58825	0.61225	0.54825	0.60225	0.60825	0.63825	0.56325	0.64525	0.64825	0.57425	0.63125
0.591125	0.585125	0.622125	0.568125	0.593125	0.587125	0.589125	0.598125	0.628125	0.598125	0.587125	0.601125	0.595125	0.618125	0.646125	0.607125	0.600125	0.601125	0.589125	0.646125	0.672125	0.595125	0.590125	0.640125	0.601125	0.593125	0.693125	0.583125	0.611125	0.595125	0.583125	0.647125	0.574125	0.597125	0.638125	0.572125	0.623125	0.627125	0.668125	0.588125	0.614125	0.550125	0.603125	0.609125	0.638125	0.562125	0.647125	0.648125	0.575125	0.627125
0.591375	0.586375	0.623375	0.567375	0.592375	0.589375	0.590375	0.599375	0.628375	0.598375	0.587375	0.603375	0.600375	0.620375	0.645375	0.608375	0.602375	0.603375	0.590375	0.646375	0.671375	0.595375	0.593375	0.642375	0.600375	0.594375	0.694375	0.582375	0.612375	0.592375	0.583375	0.648375	0.573375	0.597375	0.639375	0.574375	0.619375	0.629375	0.668375	0.587375	0.615375	0.550375	0.606375	0.610375	0.641375	0.563375	0.645375	0.647375	0.574375	0.626375
0.591	0.585	0.622	0.567	0.593	0.588	0.59	0.599	0.628	0.599	0.589	0.603	0.604	0.619	0.647	0.609	0.6	0.604	0.592	0.644	0.671	0.594	0.595	0.641	0.606	0.595	0.693	0.588	0.614	0.589	0.583	0.648	0.575	0.598	0.64	0.574	0.621	0.63	0.67	0.589	0.616	0.553	0.608	0.611	0.637	0.565	0.647	0.648	0.574	0.626
0.592125	0.585125	0.624125	0.567125	0.596125	0.588125	0.590125	0.598125	0.630125	0.600125	0.590125	0.604125	0.607125	0.621125	0.647125	0.610125	0.601125	0.604125	0.594125	0.642125	0.672125	0.593125	0.594125	0.642125	0.606125	0.603125	0.692125	0.584125	0.614125	0.592125	0.585125	0.647125	0.575125	0.599125	0.641125	0.577125	0.623125	0.634125	0.669125	0.592125	0.616125	0.556125	0.609125	0.612125	0.637125	0.563125	0.651125	0.647125	0.574125	0.625125
0.593	0.586	0.625	0.568	0.596	0.587	0.59	0.6	0.632	0.6	0.589	0.603	0.608	0.622	0.648	0.61	0.604	0.604	0.593	0.645	0.672	0.593	0.595	0.641	0.593	0.599	0.689	0.581	0.612	0.598	0.587	0.649	0.574	0.598	0.64	0.58	0.621	0.632	0.67	0.59	0.616	0.558	0.609	0.615	0.641	0.565	0.649	0.65	0.576	0.625
0.594125	0.586125	0.624125	0.567125	0.596125	0.588125	0.591125	0.601125	0.632125	0.600125	0.591125	0.603125	0.608125	0.622125	0.650125	0.610125	0.604125	0.604125	0.593125	0.647125	0.673125	0.593125	0.599125	0.643125	0.593125	0.595125	0.689125	0.582125	0.616125	0.602125	0.588125	0.649125	0.575125	0.600125	0.641125	0.579125	0.613125	0.628125	0.670125	0.590125	0.621125	0.564125	0.610125	0.613125	0.639125	0.568125	0.651125	0.651125	0.576125	0.624125
0.59525	0.58625	0.62625	0.56825	0.59625	0.59125	0.59225	0.60225	0.63425	0.59925	0.59425	0.60525	0.60825	0.62325	0.64925	0.61125	0.60225	0.60325	0.59425	0.64725	0.67425	0.59325	0.59825	0.64925	0.59825	0.59425	0.69125	0.58125	0.61025	0.59925	0.59025	0.65125	0.57425	0.59825	0.64325	0.58325	0.61025	0.62825	0.67125	0.58925	0.62125	0.56525	0.60825	0.61625	0.64025	0.56725	0.65325	0.65025	0.57525	0.62425
0.59425	0.58725	0.62625	0.56725	0.59625	0.59225	0.59225	0.60225	0.63225	0.60025	0.59325	0.60425	0.60725	0.62325	0.64925	0.61125	0.60525	0.60625	0.59425	0.64725	0.67325	0.59525	0.60225	0.64925	0.60525	0.59025	0.69325	0.58225	0.60625	0.60025	0.59225	0.65125	0.57325	0.60025	0.64425	0.58325	0.60625	0.62825	0.67525	0.58925	0.62025	0.56225	0.60925	0.61625	0.64125	0.56925	0.65525	0.65025	0.57625	0.62825
0.595	0.586	0.626	0.567	0.596	0.592	0.593	0.601	0.633	0.6	0.595	0.605	0.606	0.624	0.65	0.611	0.605	0.606	0.594	0.647	0.674	0.595	0.605	0.648	0.603	0.591	0.694	0.583	0.61	0.6	0.592	0.653	0.574	0.6	0.645	0.584	0.604	0.631	0.677	0.588	0.619	0.565	0.61	0.618	0.638	0.569	0.657	0.651	0.577	0.63
0.595125	0.587125	0.628125	0.568125	0.597125	0.591125	0.592125	0.602125	0.634125	0.599125	0.597125	0.606125	0.606125	0.625125	0.651125	0.611125	0.608125	0.605125	0.594125	0.647125	0.674125	0.597125	0.606125	0.648125	0.605125	0.592125	0.690125	0.581125	0.613125	0.603125	0.593125	0.655125	0.574125	0.601125	0.646125	0.581125	0.610125	0.629125	0.678125	0.588125	0.622125	0.567125	0.610125	0.619125	0.638125	0.570125	0.655125	0.652125	0.579125	0.624125
0.596375	0.587375	0.628375	0.568375	0.597375	0.592375	0.594375	0.602375	0.635375	0.600375	0.597375	0.607375	0.607375	0.626375	0.651375	0.612375	0.609375	0.606375	0.595375	0.649375	0.675375	0.597375	0.605375	0.645375	0.609375	0.594375	0.696375	0.586375	0.612375	0.606375	0.594375	0.657375	0.574375	0.603375	0.645375	0.581375	0.616375	0.630375	0.677375	0.591375	0.622375	0.568375	0.611375	0.619375	0.638375	0.570375	0.657375	0.653375	0.580375	0.627375
0.596375	0.587375	0.628375	0.567375	0.596375	0.593375	0.592375	0.603375	0.636375	0.600375	0.595375	0.606375	0.609375	0.626375	0.650375	0.611375	0.608375	0.605375	0.594375	0.649375	0.676375	0.596375	0.603375	0.643375	0.606375	0.594375	0.693375	0.582375	0.609375	0.605375	0.596375	0.657375	0.575375	0.600375	0.647375	0.581375	0.616375	0.629375	0.679375	0.590375	0.620375	0.570375	0.611375	0.620375	0.638375	0.568375	0.657375	0.652375	0.580375	0.625375
0.596125	0.588125	0.629125	0.567125	0.596125	0.594125	0.596125	0.603125	0.637125	0.601125	0.596125	0.605125	0.610125	0.626125	0.650125	0.612125	0.610125	0.605125	0.595125	0.650125	0.675125	0.596125	0.606125	0.642125	0.603125	0.594125	0.692125	0.580125	0.612125	0.601125	0.597125	0.656125	0.575125	0.602125	0.649125	0.586125	0.619125	0.630125	0.675125	0.591125	0.620125	0.572125	0.611125	0.620125	0.639125	0.568125	0.659125	0.652125	0.581125	0.626125
0.597125	0.590125	0.632125	0.567125	0.597125	0.594125	0.598125	0.604125	0.640125	0.601125	0.597125	0.608125	0.610125	0.629125	0.653125	0.611125	0.611125	0.603125	0.595125	0.653125	0.677125	0.595125	0.607125	0.645125	0.605125	0.595125	0.694125	0.581125	0.603125	0.608125	0.599125	0.658125	0.577125	0.604125	0.649125	0.583125	0.617125	0.629125	0.678125	0.592125	0.620125	0.573125	0.610125	0.622125	0.639125	0.568125	0.659125	0.655125	0.581125	0.626125
0.599	0.59	0.631	0.568	0.596	0.594	0.599	0.605	0.64	0.602	0.598	0.607	0.61	0.629	0.652	0.612	0.612	0.61	0.594	0.654	0.678	0.595	0.608	0.65	0.605	0.594	0.696	0.583	0.604	0.609	0.6	0.659	0.577	0.607	0.65	0.582	0.615	0.63	0.678	0.591	0.62	0.573	0.61	0.621	0.64	0.569	0.661	0.655	0.581	0.629
0.59925	0.59025	0.63125	0.56825	0.59625	0.59425	0.59925	0.60525	0.63725	0.60125	0.59725	0.60725	0.60925	0.62825	0.65225	0.61125	0.61325	0.60625	0.59425	0.65425	0.67725	0.59625	0.60725	0.64525	0.60425	0.59625	0.69825	0.58025	0.60825	0.61025	0.59925	0.65925	0.57725	0.60725	0.65225	0.58325	0.61325	0.63025	0.67725	0.59225	0.62025	0.57425	0.61125	0.62325	0.64025	0.56925	0.66125	0.65325	0.58025	0.62925
0.6	0.591	0.632	0.568	0.598	0.595	0.602	0.607	0.639	0.603	0.599	0.609	0.609	0.628	0.653	0.611	0.614	0.607	0.594	0.654	0.678	0.596	0.607	0.645	0.605	0.594	0.697	0.584	0.607	0.606	0.599	0.659	0.576	0.607	0.652	0.583	0.612	0.631	0.683	0.592	0.623	0.577	0.611	0.622	0.64	0.569	0.66	0.655	0.582	0.629
0.60025	0.59225	0.63325	0.56825	0.60025	0.59825	0.60225	0.60625	0.64025	0.60325	0.59925	0.60825	0.61125	0.62925	0.65225	0.61225	0.61525	0.60725	0.59225	0.65525	0.67825	0.59525	0.60725	0.64525	0.60325	0.59325	0.69325	0.58825	0.60425	0.60725	0.59925	0.66025	0.57825	0.61025	0.65325	0.58325	0.61025	0.63025	0.68425	0.59125	0.62225	0.57325	0.61225	0.62525	0.63925	0.57125	0.66125	0.65325	0.58325	0.63025
0.601375	0.593375	0.635375	0.567375	0.600375	0.597375	0.602375	0.606375	0.640375	0.603375	0.600375	0.611375	0.611375	0.630375	0.653375	0.613375	0.616375	0.607375	0.592375	0.656375	0.679375	0.596375	0.606375	0.642375	0.603375	0.596375	0.698375	0.585375	0.606375	0.610375	0.599375	0.663375	0.579375	0.609375	0.653375	0.583375	0.611375	0.629375	0.683375	0.591375	0.624375	0.578375	0.612375	0.625375	0.640375	0.570375	0.663375	0.656375	0.584375	0.630375
0.602375	0.593375	0.636375	0.567375	0.599375	0.597375	0.603375	0.607375	0.640375	0.602375	0.599375	0.610375	0.611375	0.630375	0.654375	0.614375	0.615375	0.605375	0.592375	0.656375	0.679375	0.595375	0.606375	0.642375	0.602375	0.594375	0.700375	0.583375	0.612375	0.611375	0.599375	0.662375	0.579375	0.610375	0.653375	0.587375	0.614375	0.625375	0.684375	0.591375	0.627375	0.578375	0.611375	0.624375	0.640375	0.570375	0.664375	0.657375	0.584375	0.631375
0.60225	0.59425	0.63425	0.56925	0.59925	0.59925	0.60425	0.60825	0.64325	0.60225	0.60125	0.61225	0.61025	0.63025	0.65425	0.61325	0.61625	0.60725	0.59125	0.65725	0.67925	0.59525	0.60625	0.64125	0.60125	0.59425	0.70025	0.58725	0.61025	0.60825	0.59825	0.66425	0.57925	0.60925	0.65425	0.58225	0.61725	0.62725	0.68825	0.59125	0.62725	0.57625	0.61025	0.62525	0.63925	0.57025	0.66425	0.66025	0.58325	0.63225
0.603375	0.594375	0.635375	0.569375	0.599375	0.600375	0.604375	0.608375	0.644375	0.603375	0.601375	0.609375	0.610375	0.631375	0.653375	0.613375	0.615375	0.607375	0.591375	0.656375	0.679375	0.596375	0.606375	0.642375	0.602375	0.597375	0.701375	0.588375	0.605375	0.608375	0.599375	0.666375	0.582375	0.611375	0.656375	0.583375	0.619375	0.630375	0.691375	0.590375	0.628375	0.581375	0.610375	0.626375	0.640375	0.570375	0.665375	0.659375	0.584375	0.634375
0.605125	0.596125	0.638125	0.569125	0.599125	0.599125	0.606125	0.609125	0.645125	0.604125	0.604125	0.611125	0.610125	0.631125	0.654125	0.613125	0.615125	0.606125	0.591125	0.656125	0.680125	0.595125	0.605125	0.646125	0.606125	0.600125	0.701125	0.588125	0.606125	0.610125	0.600125	0.667125	0.581125	0.611125	0.655125	0.583125	0.620125	0.632125	0.691125	0.592125	0.628125	0.579125	0.609125	0.629125	0.641125	0.570125	0.665125	0.659125	0.584125	0.635125
0.605125	0.597125	0.638125	0.570125	0.601125	0.600125	0.606125	0.610125	0.645125	0.604125	0.603125	0.614125	0.609125	0.633125	0.655125	0.613125	0.615125	0.606125	0.591125	0.658125	0.681125	0.596125	0.606125	0.644125	0.607125	0.603125	0.705125	0.588125	0.609125	0.610125	0.601125	0.668125	0.581125	0.612125	0.655125	0.586125	0.622125	0.633125	0.693125	0.591125	0.628125	0.581125	0.609125	0.628125	0.644125	0.570125	0.667125	0.657125	0.584125	0.639125
0.60625	0.59825	0.63925	0.57025	0.60125	0.60125	0.60725	0.61125	0.64625	0.60525	0.60225	0.61425	0.61025	0.63125	0.65525	0.61325	0.61425	0.60825	0.59125	0.65725	0.68125	0.59625	0.60625	0.64425	0.60925	0.60225	0.70025	0.58625	0.60825	0.61025	0.60125	0.67125	0.58225	0.61225	0.65525	0.58425	0.62025	0.63225	0.69525	0.59225	0.62925	0.57925	0.60825	0.62725	0.64125	0.57125	0.66625	0.65925	0.58325	0.64025
0.60625	0.59925	0.64125	0.56925	0.60025	0.60225	0.60725	0.61325	0.64825	0.60525	0.60525	0.61525	0.61025	0.63225	0.65625	0.61525	0.61425	0.60725	0.59025	0.65825	0.68225	0.59825	0.60625	0.64425	0.61225	0.60225	0.70325	0.58825	0.60525	0.61125	0.60125	0.67225	0.58125	0.61225	0.65625	0.58325	0.61825	0.63425	0.69725	0.59225	0.62925	0.58325	0.60925	0.62725	0.64325	0.57025	0.66525	0.65825	0.58325	0.64325
0.60525	0.60025	0.64025	0.57025	0.60125	0.60425	0.60825	0.61325	0.64425	0.60625	0.60525	0.61525	0.60925	0.63325	0.65825	0.61425	0.61325	0.60925	0.59025	0.66025	0.68225	0.59625	0.60625	0.64425	0.61425	0.60125	0.70225	0.58725	0.60825	0.61025	0.59925	0.67125	0.58225	0.61325	0.65625	0.58925	0.61725	0.63125	0.69625	0.59325	0.62825	0.58125	0.60825	0.62925	0.64525	0.57025	0.66525	0.66025	0.58225	0.64125
0.60725	0.60125	0.64125	0.57125	0.60225	0.60525	0.60925	0.61325	0.64725	0.60825	0.60625	0.61725	0.61025	0.63525	0.65625	0.61525	0.61325	0.61025	0.58925	0.65925	0.68325	0.59725	0.60725	0.64525	0.61525	0.60225	0.70825	0.58825	0.60725	0.61325	0.59925	0.67225	0.58425	0.61425	0.65625	0.58725	0.61425	0.63125	0.69925	0.59525	0.62925	0.58325	0.60825	0.62925	0.64325	0.57225	0.66625	0.65925	0.58225	0.64325
0.608	0.602	0.642	0.572	0.601	0.606	0.609	0.613	0.65	0.608	0.608	0.619	0.61	0.636	0.657	0.616	0.614	0.61	0.59	0.659	0.683	0.599	0.607	0.648	0.614	0.603	0.706	0.59	0.609	0.614	0.599	0.671	0.585	0.613	0.66	0.589	0.62	0.632	0.698	0.596	0.628	0.58	0.608	0.628	0.642	0.571	0.667	0.661	0.582	0.642
0.611	0.603	0.642	0.571	0.602	0.605	0.61	0.614	0.652	0.607	0.609	0.617	0.611	0.636	0.658	0.617	0.615	0.608	0.59	0.66	0.684	0.6	0.608	0.644	0.613	0.603	0.71	0.59	0.609	0.614	0.598	0.672	0.585	0.614	0.657	0.586	0.622	0.632	0.7	0.599	0.632	0.581	0.606	0.629	0.641	0.571	0.667	0.661	0.581	0.643
0.61125	0.60425	0.64425	0.57125	0.60325	0.60625	0.61025	0.61425	0.64725	0.60925	0.60725	0.61825	0.61225	0.63525	0.65825	0.61625	0.61425	0.60925	0.59025	0.66125	0.68325	0.59925	0.60725	0.64625	0.61225	0.60325	0.70825	0.59025	0.60925	0.61425	0.59925	0.67425	0.58625	0.61425	0.65825	0.58825	0.62625	0.63325	0.70225	0.59725	0.63225	0.58225	0.60625	0.62925	0.64225	0.57225	0.66725	0.66125	0.58125	0.64425
0.61125	0.60525	0.64425	0.57225	0.60425	0.60725	0.61125	0.61625	0.65325	0.60925	0.61025	0.61925	0.61225	0.63625	0.65825	0.61725	0.61525	0.60925	0.59025	0.66125	0.68425	0.60025	0.60725	0.64925	0.61125	0.60625	0.71625	0.59025	0.61125	0.61425	0.59925	0.67525	0.58725	0.61525	0.65925	0.59125	0.62725	0.63425	0.70825	0.59825	0.63325	0.58325	0.60525	0.63025	0.64325	0.57325	0.66825	0.66025	0.58125	0.64425
0.611125	0.607125	0.645125	0.572125	0.606125	0.607125	0.611125	0.617125	0.652125	0.611125	0.607125	0.620125	0.613125	0.638125	0.658125	0.617125	0.615125	0.609125	0.592125	0.661125	0.686125	0.600125	0.608125	0.650125	0.612125	0.606125	0.719125	0.590125	0.611125	0.614125	0.598125	0.675125	0.587125	0.614125	0.659125	0.593125	0.627125	0.639125	0.709125	0.598125	0.635125	0.583125	0.604125	0.630125	0.643125	0.573125	0.669125	0.664125	0.582125	0.645125
0.612125	0.608125	0.645125	0.573125	0.606125	0.609125	0.610125	0.617125	0.652125	0.612125	0.609125	0.619125	0.614125	0.638125	0.659125	0.616125	0.616125	0.611125	0.592125	0.662125	0.686125	0.600125	0.608125	0.647125	0.614125	0.613125	0.717125	0.592125	0.611125	0.615125	0.599125	0.676125	0.587125	0.615125	0.659125	0.585125	0.627125	0.636125	0.707125	0.599125	0.636125	0.584125	0.606125	0.632125	0.645125	0.573125	0.669125	0.665125	0.582125	0.647125
0.612375	0.608375	0.645375	0.573375	0.606375	0.609375	0.614375	0.619375	0.654375	0.612375	0.611375	0.622375	0.615375	0.639375	0.660375	0.617375	0.616375	0.612375	0.592375	0.662375	0.686375	0.601375	0.608375	0.646375	0.617375	0.612375	0.716375	0.591375	0.612375	0.621375	0.599375	0.676375	0.587375	0.615375	0.659375	0.591375	0.628375	0.636375	0.709375	0.596375	0.635375	0.585375	0.606375	0.633375	0.646375	0.573375	0.670375	0.662375	0.582375	0.648375
0.61325	0.60925	0.64625	0.57425	0.60525	0.60825	0.61425	0.61925	0.65325	0.61325	0.61225	0.62225	0.61525	0.64025	0.66025	0.61825	0.61625	0.61225	0.59225	0.66125	0.68525	0.60125	0.60825	0.64525	0.61825	0.61425	0.72025	0.59025	0.61425	0.61525	0.59925	0.67525	0.58925	0.61525	0.66025	0.59225	0.62525	0.63825	0.71225	0.59525	0.63625	0.58625	0.60725	0.63425	0.64425	0.57325	0.66925	0.66225	0.58225	0.64925
0.613125	0.609125	0.648125	0.575125	0.607125	0.610125	0.614125	0.620125	0.656125	0.614125	0.612125	0.624125	0.616125	0.641125	0.661125	0.619125	0.617125	0.613125	0.592125	0.662125	0.686125	0.602125	0.610125	0.645125	0.619125	0.619125	0.723125	0.592125	0.616125	0.614125	0.599125	0.676125	0.591125	0.615125	0.660125	0.587125	0.625125	0.638125	0.714125	0.596125	0.639125	0.585125	0.608125	0.636125	0.645125	0.574125	0.670125	0.663125	0.582125	0.651125
0.614125	0.611125	0.648125	0.575125	0.607125	0.611125	0.616125	0.621125	0.657125	0.615125	0.612125	0.626125	0.617125	0.642125	0.662125	0.619125	0.618125	0.613125	0.593125	0.663125	0.687125	0.603125	0.608125	0.647125	0.620125	0.620125	0.725125	0.592125	0.615125	0.617125	0.598125	0.675125	0.590125	0.615125	0.660125	0.586125	0.623125	0.638125	0.712125	0.598125	0.639125	0.587125	0.609125	0.636125	0.646125	0.575125	0.669125	0.665125	0.582125	0.654125
0.61425	0.61125	0.64925	0.57625	0.60725	0.61225	0.61625	0.62125	0.65625	0.61525	0.61225	0.62325	0.61725	0.64225	0.66325	0.62125	0.61725	0.61225	0.59425	0.66325	0.68825	0.60525	0.61025	0.64925	0.62025	0.61825	0.72525	0.59225	0.61325	0.62025	0.59925	0.67525	0.59125	0.61625	0.66025	0.58725	0.62625	0.63825	0.71425	0.60025	0.64025	0.58725	0.60725	0.63625	0.64625	0.57525	0.66825	0.66325	0.58225	0.65425
0.61625	0.61225	0.65025	0.57625	0.60825	0.61325	0.61725	0.62225	0.65725	0.61725	0.61325	0.62725	0.61925	0.64425	0.66425	0.62225	0.61925	0.61125	0.59525	0.66425	0.68925	0.60625	0.61025	0.64825	0.62025	0.61925	0.72625	0.59525	0.61625	0.62125	0.59825	0.67425	0.59125	0.61725	0.66025	0.58925	0.62625	0.64125	0.72025	0.60125	0.64025	0.58925	0.60725	0.63725	0.64725	0.57625	0.66925	0.66525	0.58225	0.65525
0.617125	0.612125	0.650125	0.578125	0.609125	0.614125	0.620125	0.623125	0.658125	0.617125	0.614125	0.627125	0.621125	0.644125	0.664125	0.622125	0.619125	0.613125	0.595125	0.665125	0.688125	0.604125	0.611125	0.648125	0.618125	0.621125	0.727125	0.596125	0.617125	0.626125	0.598125	0.674125	0.591125	0.616125	0.663125	0.590125	0.626125	0.643125	0.720125	0.604125	0.641125	0.588125	0.607125	0.638125	0.645125	0.576125	0.670125	0.668125	0.582125	0.654125
0.618125	0.615125	0.651125	0.578125	0.611125	0.616125	0.621125	0.623125	0.659125	0.617125	0.615125	0.629125	0.623125	0.645125	0.663125	0.623125	0.620125	0.614125	0.596125	0.666125	0.687125	0.606125	0.611125	0.649125	0.613125	0.623125	0.728125	0.591125	0.617125	0.618125	0.599125	0.675125	0.591125	0.617125	0.663125	0.586125	0.627125	0.640125	0.721125	0.604125	0.639125	0.590125	0.606125	0.637125	0.649125	0.577125	0.671125	0.669125	0.581125	0.655125
[truncated: 74 more rows]
[truncated: 25 more columns]

## Sheet: calculations
Vmax, R2, t at Vmax, lagtime calculations for a sliding window of 9 and 6 points (each up to 23h). The sliding window chosen for further analyses was 9 points.
[truncated: 120 more rows]

[truncated: 1 more sheets: statistical_tests]
