# Supplementary material for: The birth of a bacterial tRNA gene by large-scale, tandem duplication events
Source: eLife. 2020 Oct 30;9:e57947. doi: 10.7554/eLife.57947 (PMC7661048; doi:10.7554/eLife.57947)
Supplement: Figure 5—source data 1. — Using the aligned YAMAT-seq read data (Supplementary file 7) as input, DESeq2 output consists of: baseMean1 and baseMean2 (the normalized mean expression level of three replicates of strains 1 and 2); fold.change1 and fold.change2 (fold change calculated by baseMean1/baseMean2 or baseMean2/baseMean1, respectively); log2.fold.change1 (log2 of fold.change1); p-value (calculated by assuming a binomially distributed read coverage analogous to Fisher’s exact test [Robinson and Smyth, 2008; Anders and Huber, 2010; Anders et al., 2015]); padj (p-value adjusted for multiple testing with the Benjamini–Hochberg procedure, which controls for false discovery rate Anders and Huber, 2010; Anders et al., 2015). For each pairwise comparison, rows (tRNA types) are ordered according to increasing padj. Next, all rows with a padj < 0.01 (above the solid black line) were ordered by decreasing log2(fold.change1), and those with a negative log2(fold.change1) value were reordered according to decreasing fold.change2. This puts the tRNA types with statistically significant differences first, with those higher in strain 1 listed at the top (ordered by decreasing size of expression difference; green), followed by those higher in strain 2 (ordered by decreasing expression difference; pink). The first tab contains the comparisons investigating the effect of deleting the serCGA gene (Figure 5A). The second tab contains the comparisons investigating the effect of duplicating the serTGA gene (Figure 5B). The third tab contains the comparisons between the five different duplication strains (Figure 5—figure supplement 1). The fourth tab contains the comparisons between each of the five duplication strains and SBW25. [file elife-57947-fig5-data1.xlsx]

## Sheet: fig5a
Pairwise comparisons of the expression levels of tRNA types in the mature tRNA pool. Using the aligned YAMAT-seq read data (supplemental file 7) as input, DESeq2 output consists of: baseMean1 and baseMean2 (the normalized mean expression level of three replicates of strain 1 and strain 2); fold.change1 and fold.change2 (fold change calculated by baseMean1/baseMean2 or baseMean2/baseMean1, respect…
1: delserCGA-1 (strain 1: engineered serCGA deletion mutant, independent copy 1) versus SBW25 (strain 1: wild type)												2: delserCGA-1 (strain 1: engineered serCGA deletion mutant, independent copy 2) versus SBW25 (strain 1: wild type)												3: control comparisons: delserCGA-1 (strain 1: engineered serCGA deletion mutant number 1) versus delserCGA-2 (strain 2: engineered serCGA deletion mutant number 2)
Result: 2 tRNAs higher in deletion mutant (Gly-GCC, Ala-GGC); 3 tRNAs higher in SBW25 (Ser-CGA, Thr-CGU, Gly-UCC)												Result: 2 tRNAs higher in SBW25 (Ser-CGA, Thr-CGU)												Result: No significant differences in tRNA expression levels
contig	baseMean_strain1	baseMean_strain2	Fold.change1 (strain1/strain2)	Fold.change2 (strain2/strain1)	log2FoldChange	pvalue	padj	baseMean	lfcSE	stat	notes	contig	baseMean_strain1	baseMean_strain2	Fold.change1 (strain1/strain2)	Fold.change2 (strain2/strain1)	log2FoldChange	pvalue	padj	baseMean	lfcSE	stat	notes	contig	baseMean_strain1	baseMean_strain2	Fold.change1 (strain1/strain2)	Fold.change2 (strain2/strain1)	log2FoldChange	pvalue	padj	baseMean	lfcSE	stat	notes
Ala-GGC	87985	73895.6	1.19067	0.839866	0.251779	0.000443365	0.00421197	80940.3	0.0716742	3.51283	higher expression in delsercga_1 than sBW25	Ser-CGA	0.89842	13390.3	6.7095e-05	14904.2	-13.5275	6.22304e-57	2.42699e-55	6695.59	0.850724	-15.9011	higher expression in SBW25 than delsercga_2	Pro-GGG	6962.19	5605.68	1.24199	0.80516	0.313014	0.118428	0.874908	6283.93	0.200469	1.56141
Gly-GCC	173439	151570	1.14428	0.873908	0.194441	3.20677e-07	6.09286e-06	162505	0.0380447	5.11087	higher expression in delsercga_1 than sBW25	Thr-CGU	203.297	341.83	0.594733	1.68143	-0.749073	6.87881e-06	0.000134137	272.563	0.166557	-4.4974	higher expression in SBW25 than delsercga_2	Asn-GUU	17224.5	14851.6	1.15977	0.862237	0.214013	0.258279	0.874908	16038.1	0.189313	1.13047
Ser-CGA	1.0942	15973.9	6.8499e-05	14598.8	-14.0893	2.01381e-62	7.65248e-61	7987.51	0.844965	-16.6744	higher expression in SBW25 than delsercga1_1	Val-UAC	62533.1	47597.8	1.31378	0.761163	0.393644	0.00116147	0.015099	55065.5	0.121189	3.24818		Tyr-GUA	13379.6	11547.3	1.15868	0.863052	0.212576	0.171282	0.874908	12463.4	0.155381	1.36809
Thr-CGU	272.042	407.377	0.667791	1.49748	-0.588518	1.26806e-05	0.000160621	339.709	0.13481	-4.36554	higher expression in SBW25 than delsercga1_1	Gly-UCC	14438.1	17886.9	0.807187	1.23887	-0.308993	0.00327577	0.0319388	16162.5	0.105078	-2.9406		Thr-CGU	238.131	211.275	1.12712	0.88722	0.168466	0.269202	0.874908	224.703	0.152472	1.1049
Gly-UCC	16634.2	21330.1	0.779846	1.28231	-0.358729	0.00120804	0.00918113	18982.2	0.110822	-3.23697	higher expression in SBW25 than delsercga1_1	Ala-GGC	79529.1	61969.7	1.28335	0.779208	0.359892	0.00505882	0.0394588	70749.4	0.128383	2.80326		Arg-CCU	739.514	829.018	0.892036	1.12103	-0.16838	0.253126	0.874908	784.266	0.147341	-1.14279
Pro-GGG	7935.11	6378.07	1.24412	0.803778	0.315685	0.007974	0.0432874	7156.59	0.118984	2.65317		Asn-GUU	14279.2	17380.8	0.821551	1.21721	-0.283429	0.00954228	0.0620248	15830	0.109348	-2.59199		Val-UAC	56474.9	65058.1	0.86807	1.15198	-0.204073	0.0699857	0.874908	60766.5	0.112623	-1.812
Leu-UAA	1694.76	1365.27	1.24133	0.805585	0.311308	0.00785682	0.0432874	1530.01	0.117114	2.65816		Thr-GGU	2561.71	1269.43	2.01801	0.495538	1.01271	0.0195343	0.106176	1915.57	0.433676	2.33517		His-GUG	965.318	1139.14	0.847406	1.18007	-0.241105	0.254526	0.874908	1052.23	0.211603	-1.13943
Thr-GGU	2361.7	1510.75	1.56327	0.639686	0.642764	0.0129478	0.0615019	1936.23	0.258636	2.4852		His-GUG	1097.81	770.798	1.42425	0.702126	0.508493	0.0223867	0.106176	934.302	0.222658	2.28374		Thr-UGU	10747.8	13369.2	0.803922	1.2439	-0.315041	0.117147	0.874908	12058.5	0.201065	-1.56686
Asp-GUC	111322	99680.5	1.11679	0.895423	0.159401	0.0150886	0.0637074	105501	0.0655905	2.43025		Leu-UAA	1466.74	1145.31	1.28065	0.780851	0.356951	0.0272246	0.106176	1306.03	0.161642	2.20828		Thr-GGU	2068.6	2652.19	0.779961	1.28212	-0.35947	0.207638	0.874908	2360.4	0.285274	-1.26009
Pro-UGG	3445.23	2880.12	1.19621	0.835973	0.256944	0.0199597	0.0707132	3162.67	0.110414	2.3271		Leu-CAA	19718.9	24568.3	0.802618	1.24592	-0.317224	0.0261421	0.106176	22143.6	0.142631	-2.22409		fMet-CAU	4608.08	6268.72	0.735091	1.36037	-0.44429	0.05063	0.874908	5438.4	0.227305	-1.9546
Arg-CCU	845.028	1086.5	0.777749	1.28576	-0.367295	0.0204696	0.0707132	965.766	0.158479	-2.31763		Ile2-CAU	28.3711	18.1365	1.56431	0.639259	0.631981	0.049599	0.175851	23.2538	0.32188	1.96341		Ile2-CAU	19.9951	29.3733	0.680724	1.46902	-0.545529	0.177592	0.874908	24.6842	0.404633	-1.34821
Val-UAC	64528.9	56713.7	1.1378	0.878888	0.186147	0.0364976	0.115576	60621.3	0.0890085	2.09134		Arg-ACG	70827.6	58876.2	1.20299	0.83126	0.266599	0.0632995	0.205724	64851.9	0.143558	1.85708		Phe-GAA	24.3149	35.2525	0.689734	1.44983	-0.578868	0.128582	0.874908	29.7837	0.380905	-1.51972
Ala-UGC	124330	132014	0.94179	1.06181	-0.0865514	0.0503114	0.147064	128172	0.0442197	-1.95731		Cys-GCA	16784.9	14672	1.14401	0.874117	0.194057	0.0837436	0.251231	15728.4	0.112213	1.72937		Trp-CCA	43191.8	39590.8	1.09096	0.916627	0.125689	0.486286	0.961586	41391.3	0.180529	0.696228
Ile-GAU	49529.9	57082.4	0.867691	1.15248	-0.204665	0.0599904	0.162831	53306.2	0.108814	-1.88086		Gly-GCC	151856	127132	1.19447	0.83719	0.256361	0.0910986	0.253775	139494	0.151726	1.68963		Arg-UCU	1540.71	1414.25	1.08942	0.917918	0.124469	0.502532	0.961586	1477.48	0.185633	0.670511
Arg-CCG	5785.96	6999.89	0.826579	1.20981	-0.275509	0.105607	0.267537	6392.92	0.17025	-1.61826		Trp-CCA	37983.7	44775.5	0.848316	1.17881	-0.23738	0.11789	0.287358	41379.6	0.151808	-1.56369		Pro-UGG	3015.08	2842.22	1.06082	0.94267	0.0845872	0.552767	0.961586	2928.65	0.142494	0.593618
Leu-CAA	24067.8	29316.7	0.82096	1.21809	-0.284451	0.12316	0.292504	26692.3	0.184511	-1.54165		Arg-CCG	4855.76	5877.14	0.826211	1.21035	-0.275617	0.114814	0.287358	5366.45	0.174782	-1.57692		Leu-CAG	53609.3	50682.4	1.05775	0.945404	0.0809942	0.497156	0.961586	52145.8	0.11929	0.678971
Arg-ACG	81202.1	70122.1	1.15801	0.863549	0.21157	0.192583	0.43048	75662.1	0.162375	1.30297		Ser-UGA	4509.82	5408.58	0.833826	1.19929	-0.26186	0.188786	0.433097	4959.2	0.199257	-1.31418		Glu-UUC	104.468	98.8084	1.05728	0.945825	0.076552	0.838306	0.961586	101.638	0.375142	0.204061
Gln-UUG	998.056	1106.43	0.902054	1.10858	-0.151588	0.228004	0.481342	1052.24	0.125745	-1.20552		Ile-GAU	42596.4	47878.2	0.889682	1.124	-0.168699	0.200905	0.435295	45237.3	0.131901	-1.27898		Ser-UGA	4859.99	4686.88	1.03694	0.96438	0.0529297	0.7634	0.961586	4773.44	0.175835	0.301019
His-GUG	1102.96	917.594	1.20201	0.831937	0.261825	0.257047	0.495213	1010.28	0.231009	1.1334		Leu-UAG	6650.3	5732.85	1.16003	0.862044	0.214246	0.212245	0.435661	6191.57	0.171752	1.24742		Asp-GUC	97408.1	93929.3	1.03704	0.964286	0.0524926	0.706008	0.961586	95668.7	0.139155	0.377223
Trp-CCA	49279.5	53397.2	0.922884	1.08356	-0.115636	0.27367	0.495213	51338.4	0.105637	-1.09465		Tyr-GUA	11118.7	12344.2	0.90072	1.11022	-0.150622	0.239788	0.467586	11731.5	0.128132	-1.17552		Leu-CAA	21066.5	20530.8	1.02609	0.974571	0.0373577	0.835026	0.961586	20798.7	0.17938	0.20826
Phe-GAA	27.8171	35.842	0.776101	1.28849	-0.414873	0.2626	0.495213	31.8295	0.370335	-1.12027		Arg-UCU	1357.33	1575.56	0.861487	1.16078	-0.215766	0.263356	0.48909	1466.44	0.192907	-1.11849		Ile-GAU	43361.5	44366.3	0.977352	1.02317	-0.0329559	0.8346	0.961586	43863.9	0.157831	-0.208805
Leu-UAG	7368.69	6831.77	1.07859	0.927135	0.108388	0.316253	0.522505	7100.23	0.108152	1.00219		Thr-UGU	12898.6	10215.8	1.26262	0.792005	0.336378	0.287456	0.495334	11557.2	0.316229	1.06372		Ser-GCU	12489.8	12814.6	0.974656	1.026	-0.0367224	0.800473	0.961586	12652.2	0.1453	-0.252735
Ser-UGA	5552.85	6457.59	0.859895	1.16293	-0.217115	0.31609	0.522505	6005.22	0.216568	-1.00253		Arg-CCU	798.252	912.323	0.874967	1.1429	-0.193578	0.29212	0.495334	855.288	0.18375	-1.05348		Leu-UAA	1482	1523.56	0.972723	1.02804	-0.0401791	0.777705	0.961586	1502.78	0.142322	-0.282311
Arg-UCU	1759.78	1877.91	0.937094	1.06713	-0.0941343	0.340657	0.539373	1818.84	0.0987905	-0.952868		Pro-UGG	2732.33	2416.7	1.1306	0.884484	0.176995	0.323259	0.518602	2574.51	0.179184	0.987784		Gly-UCC	14546.3	15010.1	0.969101	1.03188	-0.0452495	0.684893	0.961586	14778.2	0.111508	-0.405796
fMet-CAU	5268.77	6104.25	0.863131	1.15857	-0.212969	0.361529	0.549524	5686.51	0.233402	-0.912456		Gln-UUG	831.226	928.195	0.89553	1.11666	-0.15898	0.332437	0.518602	879.71	0.16403	-0.969216		Ser-GGA	7152.46	7403.94	0.966035	1.03516	-0.0495329	0.765881	0.961586	7278.2	0.166348	-0.297767
Cys-GCA	19124.3	17495.3	1.09311	0.914823	0.128506	0.384102	0.561379	18309.8	0.147647	0.870364		Ser-GCU	12310.8	11375	1.08227	0.923985	0.11408	0.428812	0.619395	11842.9	0.144181	0.791226		Arg-ACG	71051.9	73665.4	0.964522	1.03678	-0.0521667	0.740849	0.961586	72358.7	0.157732	-0.33073
Ser-GCU	14249.2	13571.2	1.04995	0.952422	0.0706563	0.611881	0.861166	13910.2	0.139254	0.50739		Asp-GUC	90198.4	83587.5	1.07909	0.926708	0.109804	0.413395	0.619395	86892.9	0.134246	0.817933		Met-CAU	2661.18	2761.56	0.96365	1.03772	-0.0540633	0.79988	0.961586	2711.37	0.213266	-0.253502
Glu-UUC	120.394	107.996	1.1148	0.897025	0.148392	0.709327	0.864845	114.195	0.39809	0.37276		Ser-GGA	7131.57	6595.16	1.08133	0.924785	0.112979	0.484513	0.674858	6863.37	0.161615	0.699062		Ala-UGC	108792	113281	0.960371	1.04126	-0.0583133	0.703777	0.961586	111037	0.153364	-0.380227
Ser-GGA	8154.04	7866.44	1.03656	0.964729	0.0525073	0.702002	0.864845	8010.24	0.137231	0.382619		fMet-CAU	6050.36	5130.07	1.17939	0.847895	0.237929	0.548491	0.690037	5590.22	0.396533	0.600023		Gly-GCC	151779	158202	0.959404	1.04231	-0.0597762	0.709277	0.961586	154990	0.160332	-0.372828
Tyr-GUA	15253.6	14719.3	1.0363	0.964973	0.0517581	0.705177	0.864845	14986.5	0.136803	0.378341		Phe-GAA	34.0193	30.0799	1.13096	0.884202	0.170351	0.547904	0.690037	32.0496	0.283491	0.600904		Val-GAC	29099.4	30385.2	0.957682	1.04419	-0.0622382	0.748929	0.961586	29742.3	0.194463	-0.320051
Met-CAU	3033.87	3148	0.963747	1.03762	-0.0539648	0.728291	0.864845	3090.93	0.155339	-0.3474		Leu-CAG	48733.3	51111.7	0.953467	1.0488	-0.0686895	0.531092	0.690037	49922.5	0.109668	-0.62634		Cys-GCA	16711.8	17466.4	0.956795	1.04516	-0.0635981	0.673931	0.961586	17089.1	0.151151	-0.42076
Asn-GUU	19589.1	20726.6	0.945121	1.05807	-0.0811928	0.652048	0.864845	20157.8	0.18006	-0.450919		Gly-CCC	6175.03	5857.29	1.05425	0.948544	0.076412	0.639215	0.779044	6016.16	0.162996	0.468796		Leu-UAG	6448.3	6901.25	0.934366	1.07024	-0.0983732	0.530567	0.961586	6674.78	0.15686	-0.62714
Gly-CCC	6816.66	6985.9	0.975774	1.02483	-0.0348742	0.801419	0.922846	6901.28	0.138659	-0.251511		Val-GAC	29147.5	28217.4	1.03296	0.968089	0.0466548	0.764144	0.903079	28682.4	0.155493	0.300044		Gly-CCC	5963.4	6411.23	0.93015	1.0751	-0.104266	0.512902	0.961586	6187.31	0.159349	-0.654325
Leu-GAG	2236.37	2184.13	1.02392	0.97664	0.0344032	0.841397	0.940385	2210.25	0.171924	0.200107		Glu-UUC	94.96	90.5486	1.04872	0.953545	0.0560487	0.802862	0.92093	92.7543	0.224514	0.249645		Ala-GGC	76974.4	82778.7	0.929882	1.0754	-0.104843	0.434849	0.961586	79876.6	0.134256	-0.780921
Val-GAC	33180.2	33630.9	0.986598	1.01358	-0.019345	0.870329	0.944928	33405.5	0.118506	-0.163241		Leu-GAG	1877.78	1832.9	1.02449	0.976096	0.0355719	0.870503	0.943045	1855.34	0.218206	0.16302		Gln-UUG	874.112	864.774	1.0108	0.989317	0.0138371	0.928761	0.979424	869.443	0.154771	0.0894037
Thr-UGU	12285.3	12164.9	1.0099	0.990193	0.0138362	0.935666	0.972858	12225.1	0.171412	0.0807187		Ala-UGC	108744	110734	0.982024	1.0183	-0.0261911	0.856326	0.943045	109739	0.14466	-0.181053		Leu-GAG	1964.13	1947.66	1.00846	0.99161	0.0116647	0.957835	0.979424	1955.9	0.22063	0.05287
Leu-CAG	61165.5	60945.4	1.00361	0.996403	0.00527543	0.947256	0.972858	61055.4	0.0797465	0.0661526		Met-CAU	2662.9	2642.28	1.0078	0.992259	0.0114749	0.95844	0.9678	2652.59	0.220201	0.0521111		Arg-CCG	5062.11	5046.8	1.00303	0.996977	0.00375565	0.979424	0.979424	5054.46	0.145621	0.0257906
Lys-UUU	94754.9	94944.4	0.998005	1.002	-0.00283577	0.974455	0.974455	94849.7	0.0885579	-0.0320216		Pro-GGG	5378.43	5349.57	1.00539	0.994634	0.0076342	0.9678	0.9678	5364	0.189117	0.0403676		Lys-UUU	82904.9	83329.9	0.994901	1.00513	-0.00733584	0.957721	0.979424	83117.4	0.138375	-0.0530141
Ile2-CAU	22.7881	21.6043	1.05479	0.948054	0.079011	0.843113	NA	22.1962	0.399219	0.197914		Lys-UUU	80040	79622.1	1.00525	0.994778	0.00753697	0.953238	0.9678	79831.1	0.128527	0.0586411		Ser-CGA	0.944001	0.933963	1.01075	0.989367	-0.10582	0.968249	0.979424	0.938982	2.65849	-0.0398044

## Sheet: fig5b
Pairwise comparisons of the expression levels of tRNA types in the mature tRNA pool. Using the aligned YAMAT-seq read data (supplemental file 7) as input, DESeq2 output consists of: baseMean1 and baseMean2 (the normalized mean expression level of three replicates of strain 1 and strain 2); fold.change1 and fold.change2 (fold change calculated by baseMean1/baseMean2 or baseMean2/baseMean1, respect…
1: M1-L (strain 1) versus delserCGA-1 (strain 2)												2: M2-L (strain 1) versus delserCGA-1 (strain 2)												3: M2-Lop (strain 1) versus delserCGA-1 (strain 2)												4: M3-L (strain 1) versus delserCGA-2 (strain 2)												5: M4-L (strain 1) versus delserCGA-2 (strain 2)
Result: 2 tRNAs higher in M1-L (Ser-UGA, Thr-CGU); 2 tRNAs higher in ancestral deletion mutant (Pro-GGG, Gly-GCC)												Result: 5 tRNAs higher in M2-L (Ser-UGA, fMet-CAU, Thr-CGU, Thr-UGU, Gln-UUG); 4 tRNAs higher in ancestral deletion mutant (Pro-GGG, Gly-GCC, Ala-GGC, Pro-UGG)												Result: 3 tRNAs higher in M2-Lop (Ser-UGA, Gln-UUG, Met-CAU); 3 tRNAs higher in deletion mutant (Pro-GGG, Ala-GGC, Gly-GCC)												Result: 3 tRNAs higher in M3-L (Ser-UGA, Thr-CGU, Gln-UUG)												Result: 1 tRNA higher in M4-L (Ser-UGA)
contig	baseMean_strain1	baseMean_strain2	Fold.change1 (strain1/strain2)	Fold.change2 (strain2/strain1)	log2FoldChange	pvalue	padj	baseMean	lfcSE	stat	notes	contig	baseMean_strain1	baseMean_strain2	Fold.change1 (strain1/strain2)	Fold.change2 (strain2/strain1)	log2FoldChange	pvalue	padj	baseMean	lfcSE	stat	notes	contig	baseMean_strain1	baseMean_strain2	Fold.change1 (strain1/strain2)	Fold.change2 (strain2/strain1)	log2FoldChange	pvalue	padj	baseMean	lfcSE	stat	notes	contig	baseMean_strain1	baseMean_strain2	Fold.change1 (strain1/strain2)	Fold.change2 (strain2/strain1)	log2FoldChange	pvalue	padj	baseMean	lfcSE	stat	notes	contig	baseMean_strain1
Ser-UGA	13848.2	5335.88	2.5953	0.385311	1.37514	4.95447e-18	1.93224e-16	9592.05	0.158895	8.65441	higher expression in M1-L than delsercga_1	Ser-UGA	10975.4	5034.97	2.17983	0.458751	1.12376	6.95203e-10	1.35565e-08	8005.19	0.182217	6.16718	higher expression in M2-L than del-Sercga1	Ser-UGA	12718.5	5495.42	2.31438	0.432081	1.21001	6.86217e-15	1.33812e-13	9106.95	0.155389	7.787	higher expression in M2-Lop than del-Sercga_1	Ser-UGA	10166.6	4689.89	2.16777	0.461303	1.11638	3.13872e-17	1.2241e-15	7428.26	0.132252	8.44128	higher expression in M3-L than del-Sercga2	Ser-UGA	9327.85
Thr-CGU	403.78	261.741	1.54267	0.648227	0.629393	0.000361045	0.00357863	332.761	0.176447	3.56703	higher expression in M1-L than delsercga_1	fMet-CAU	8447.98	4784.76	1.7656	0.566379	0.820584	2.79914e-05	0.000181944	6616.37	0.19588	4.18922	higher expression in M2-L than del-Sercga1	Gln-UUG	1796.73	988.573	1.8175	0.550205	0.86291	2.92426e-17	1.14046e-15	1392.65	0.102125	8.44955	higher expression in M2-Lop than del-Sercga_1	Thr-CGU	393.978	211.481	1.86294	0.536785	0.894408	5.85929e-10	1.14256e-08	302.729	0.144395	6.19417	higher expression in M3-L than del-Sercga2	Gln-UUG	1619.55
Pro-GGG	5154.03	7640.24	0.67459	1.48238	-0.568354	0.000367039	0.00357863	6397.13	0.159528	-3.56271	higher expression in delsercga_1 than M1-L	Thr-CGU	351.304	247.047	1.42201	0.703229	0.512817	2.56136e-05	0.000181944	299.175	0.121829	4.20932	higher expression in M2-L than del-Sercga1	Met-CAU	3987.45	3007.61	1.32579	0.754268	0.406982	0.000900847	0.0058555	3497.53	0.122593	3.31979	higher expression in M2-Lop than del-Sercga_1	Gln-UUG	1302.96	865.08	1.50618	0.663933	0.590206	0.000147089	0.00191215	1084.02	0.155484	3.79593	higher expression in M3-L than del-Sercga2	Thr-CGU	356.047
Gly-GCC	146405	166842	0.877508	1.13959	-0.188525	4.2982e-06	8.38148e-05	156623	0.0410157	-4.59642	higher expression in delsercga_1 than M1-L	Thr-UGU	15795.1	11158.8	1.41548	0.706474	0.501547	0.000520293	0.00225751	13476.9	0.144534	3.47009	higher expression in M2-L than del-Sercga1	Pro-GGG	5663.74	7865.72	0.720053	1.38879	-0.473965	1.46026e-05	0.0001139	6764.73	0.109345	-4.3346	higher expression in del-Sercga_1 than M2-Lop	Ala-GGC	62586.5	82727.4	0.75654	1.32181	-0.402476	0.00192265	0.0187459	72656.9	0.12975	-3.10193		Asn-GUU	19493.9
Phe-GAA	53.5402	26.794	1.99822	0.500446	1.05422	0.00923355	0.0600181	40.1671	0.404958	2.60328		Gln-UUG	1218.59	907.141	1.34333	0.744419	0.429627	0.000428215	0.00225751	1062.86	0.121982	3.52205	higher expression in M2-L than del-Sercga1	Ala-GGC	69243.9	87086.6	0.795115	1.25768	-0.330688	2.64171e-06	2.57566e-05	78165.2	0.0704058	-4.69688	higher expression in del-Sercga_1 than M2-Lop	Phe-GAA	60.3885	35.3458	1.70851	0.585307	0.755534	0.00621026	0.04844	47.8671	0.276098	2.73647		Ala-GGC	62769.7
fMet-CAU	7019.75	5070.26	1.38449	0.722285	0.470185	0.00833353	0.0600181	6045.01	0.178218	2.63825		Pro-GGG	4573.77	7216.57	0.633788	1.57782	-0.657935	9.57017e-08	9.33092e-07	5895.17	0.123331	-5.3347	higher expression in del-Sercga1 than M2-L	Gly-GCC	143324	171694	0.834769	1.19794	-0.260569	1.17407e-12	1.52629e-11	157509	0.0366565	-7.10839	higher expression in del-Sercga_1 than M2-Lop	Arg-CCG	6407.46	5050.84	1.26859	0.788276	0.34308	0.0135906	0.0757189	5729.15	0.139017	2.46791		Val-UAC	52924.5
Asp-GUC	96969.9	107077	0.905608	1.10423	-0.143079	0.0110226	0.0614118	102024	0.0562862	-2.54198		Gly-GCC	125701	157459	0.798306	1.25265	-0.325054	9.06694e-09	1.1787e-07	141580	0.0565576	-5.74732	higher expression in del-Sercga1 than M2-L	Phe-GAA	63.2508	27.5352	2.29709	0.435334	1.22465	0.00193256	0.010268	45.393	0.394997	3.10041		Cys-GCA	14128.7	17463.7	0.809032	1.23605	-0.305602	0.0133643	0.0757189	15796.2	0.12353	-2.47391		Phe-GAA	52.8766
Ala-UGC	128897	119592	1.07781	0.927809	0.108105	0.0152744	0.0744629	124244	0.0445644	2.42581		Ala-GGC	64336.2	79863.7	0.805575	1.24135	-0.311837	1.33718e-10	5.21501e-09	72100	0.0485509	-6.42288	higher expression in del-Sercga1 than M2-L	Thr-CGU	362.459	269.348	1.34569	0.743113	0.429393	0.00210626	0.010268	315.903	0.139648	3.07482		Arg-CCU	1016.59	830.199	1.22451	0.816651	0.290279	0.0641745	0.272781	923.394	0.156825	1.85097		Ser-GGA	5760.89
Ala-GGC	76495.7	84630.3	0.903881	1.10634	-0.145739	0.0266909	0.115661	80563	0.0657663	-2.21601		Pro-UGG	2521.01	3128.88	0.805723	1.24112	-0.308975	0.000520963	0.00225751	2824.95	0.0890484	-3.46974	higher expression in del-Sercga1 than M2-L	Pro-UGG	2817.07	3410.9	0.825903	1.2108	-0.276295	0.00289201	0.012532	3113.99	0.0927477	-2.97899		Gly-GCC	129161	158042	0.817258	1.2236	-0.291122	0.0699439	0.272781	143601	0.160639	-1.81227		His-GUG	821.727
Arg-CCG	6961.89	5569.74	1.24995	0.800032	0.32287	0.0405309	0.158071	6265.82	0.157629	2.0483		Met-CAU	3949.86	2761.04	1.43057	0.699022	0.517071	0.00279922	0.0109169	3355.45	0.172993	2.98897		His-GUG	794.927	1092.37	0.727709	1.37418	-0.455551	0.00414828	0.0161783	943.649	0.158914	-2.86666		Pro-UGG	2167.99	2843.49	0.762442	1.31157	-0.391899	0.0608976	0.272781	2505.74	0.209098	-1.87424		Cys-GCA	14741.1
Arg-CCU	1004.51	813.254	1.23518	0.809599	0.308968	0.0571071	0.202471	908.884	0.162402	1.90249		Asp-GUC	85345.1	101051	0.844577	1.18402	-0.243798	0.00608808	0.021585	93197.9	0.08888	-2.743		Arg-ACG	62205.5	80408.3	0.77362	1.29262	-0.370257	0.00652216	0.023124	71306.9	0.136109	-2.72031		Asn-GUU	17818.3	14857.8	1.19926	0.833851	0.262194	0.0955538	0.286662	16338.1	0.157304	1.6668		Arg-UCU	1698.05
Gln-UUG	1200.35	960.857	1.24925	0.800483	0.324329	0.0684626	0.222504	1080.6	0.178012	1.82195		Arg-CCU	966.353	767.589	1.25895	0.794316	0.338134	0.0104455	0.033948	866.971	0.132046	2.56072		Leu-UAA	1419.01	1676.9	0.846212	1.18174	-0.241798	0.00902771	0.0293401	1547.95	0.0926075	-2.611		Ile-GAU	37874.7	44326.7	0.854444	1.17035	-0.226877	0.0898317	0.286662	41100.7	0.133749	-1.69629		Arg-CCG	5622.96
Leu-CAG	52464.2	58880.7	0.891025	1.1223	-0.166535	0.0894217	0.268265	55672.4	0.0980506	-1.69846		Gly-UCC	17873.7	15091.7	1.18434	0.844355	0.244071	0.0123373	0.0370119	16482.7	0.0975369	2.50235		Asn-GUU	26365.1	19437.5	1.35641	0.737243	0.439611	0.0103923	0.0311768	22901.3	0.171556	2.5625		Ser-GGA	6123.73	7413.89	0.825981	1.21068	-0.275967	0.0823865	0.286662	6768.81	0.158875	-1.737		Gly-UCC	15800.7
Pro-UGG	2780.53	3315.12	0.838743	1.19226	-0.253388	0.0981029	0.273287	3047.83	0.153186	-1.65412		Trp-CCA	38937.8	44764.8	0.869832	1.14965	-0.20139	0.0344371	0.0959321	41851.3	0.0952239	-2.11492		Thr-GGU	1754.85	2340.18	0.74988	1.33355	-0.413403	0.0146349	0.0407687	2047.51	0.169338	-2.44129		Val-UAC	57570.5	65047.5	0.885053	1.12988	-0.176121	0.122376	0.340905	61309	0.114003	-1.54488		Leu-UAA	1232.09
Leu-UAA	1397.49	1629.35	0.857696	1.16591	-0.221147	0.122089	0.31743	1513.42	0.143039	-1.54607		Ala-UGC	106521	112862	0.943818	1.05953	-0.0834541	0.0416629	0.108324	109692	0.0409717	-2.03687		Val-UAC	55045.3	63883.2	0.861656	1.16056	-0.214798	0.0157386	0.0409204	59464.2	0.0889461	-2.41492		Met-CAU	3422.23	2768.74	1.23602	0.809048	0.304939	0.137531	0.357582	3095.49	0.20534	1.48505		Ile2-CAU	21.3732
Met-CAU	3436.37	2922.99	1.17563	0.850605	0.234468	0.158408	0.38612	3179.68	0.166237	1.41045		Phe-GAA	47.1378	25.2858	1.8642	0.536424	0.932375	0.0550546	0.134195	36.2118	0.486005	1.91845		Arg-CCU	979.016	836.648	1.17016	0.854581	0.228481	0.0228402	0.055673	907.832	0.100383	2.2761		Leu-UAA	1324.56	1525.35	0.868364	1.15159	-0.204099	0.183534	0.447364	1424.95	0.153464	-1.32995		Thr-GGU	1722.52
Gly-UCC	17823.5	15995.1	1.11431	0.897415	0.156212	0.213845	0.490587	16909.3	0.125667	1.24306		Arg-UCU	1448.3	1597.88	0.906391	1.10328	-0.144877	0.0595859	0.136697	1523.09	0.0769049	-1.88385		Asp-GUC	98369	110193	0.892697	1.1202	-0.163868	0.0301169	0.0690918	104281	0.0755656	-2.16855		Pro-GGG	4724.06	5599.39	0.843674	1.18529	-0.244923	0.22396	0.51379	5161.72	0.201406	-1.21607		Glu-UUC	138.102
Glu-UUC	60.6192	115.473	0.524965	1.90489	-0.925522	0.2776	0.601466	88.0459	0.852445	-1.08573		Lys-UUU	77939.8	85965.2	0.906644	1.10297	-0.14144	0.0893774	0.193651	81952.5	0.083264	-1.69869		Leu-CAG	54044	60600.9	0.891803	1.12132	-0.165281	0.0498677	0.108047	57322.5	0.0842798	-1.9611		Leu-CAA	18385.9	20516.8	0.89614	1.1159	-0.158047	0.276506	0.599096	19451.3	0.145236	-1.0882		Met-CAU	3048.23
Val-UAC	58760.1	62079.3	0.946532	1.05649	-0.0792449	0.321867	0.660674	60419.7	0.0799945	-0.990629		Arg-CCG	6171.38	5256.86	1.17397	0.851813	0.232114	0.116419	0.216206	5714.12	0.147845	1.56998		Gly-UCC	18307.4	16459.9	1.11224	0.899089	0.153499	0.120512	0.247366	17383.7	0.0988638	1.55263		Val-GAC	26740.6	30333	0.881568	1.13434	-0.181735	0.311938	0.618834	28536.8	0.179728	-1.01116		Trp-CCA	43084.1
Ile2-CAU	28.9126	21.9395	1.31783	0.758821	0.380375	0.37587	0.698044	25.426	0.429544	0.885532		Leu-UAG	7329.28	6691.95	1.09524	0.913043	0.131818	0.111027	0.216206	7010.61	0.0827173	1.5936		Ile2-CAU	33.2776	22.5887	1.4732	0.678796	0.563885	0.242475	0.450312	27.9332	0.482439	1.16882		Ile2-CAU	23.6483	29.4666	0.802546	1.24603	-0.336989	0.317351	0.618834	26.5574	0.337017	-0.999916		Leu-CAG	46276.3
Thr-UGU	13159.4	11823.6	1.11298	0.89849	0.154868	0.363769	0.698044	12491.5	0.170521	0.908207		Leu-UAA	1381.94	1537.27	0.898953	1.11241	-0.152921	0.110835	0.216206	1459.6	0.095908	-1.59445		Ile-GAU	53398.6	49032	1.08906	0.918226	0.122965	0.232658	0.450312	51215.3	0.103025	1.19354		Gly-UCC	16191.6	15017.4	1.07819	0.92748	0.108706	0.335602	0.62326	15604.5	0.112895	0.962892		Ser-GCU	11197.9
Lys-UUU	87373.9	91101.3	0.959085	1.04266	-0.0603492	0.397597	0.704831	89237.6	0.0713415	-0.845921		Val-GAC	26728.6	30152.5	0.886445	1.1281	-0.174039	0.128257	0.224818	28440.6	0.114423	-1.52101		Cys-GCA	16924.8	18913.5	0.894855	1.1175	-0.160327	0.258933	0.459018	17919.1	0.142019	-1.12892		Lys-UUU	76820.7	83288	0.92235	1.08419	-0.116583	0.371193	0.647484	80054.4	0.130371	-0.89424		Gly-CCC	5573.57
Val-GAC	29813.2	31929.5	0.93372	1.07098	-0.0991262	0.451339	0.765314	30871.4	0.131609	-0.753185		Ser-GCU	11402	12950.6	0.880421	1.13582	-0.183881	0.135863	0.224818	12176.3	0.123296	-1.49138		Lys-UUU	89348.7	93778	0.952768	1.04957	-0.0698062	0.361673	0.613272	91563.4	0.0765267	-0.912182		His-GUG	1024.15	1141.05	0.897555	1.11414	-0.156167	0.38185	0.647484	1082.6	0.17858	-0.874493		Leu-GAG	1606.17
Trp-CCA	45259.8	47412.2	0.954603	1.04756	-0.0672063	0.535975	0.77529	46336	0.108588	-0.618911		Cys-GCA	14601.7	17330.3	0.842551	1.18687	-0.24727	0.13835	0.224818	15966	0.166853	-1.48197		Glu-UUC	160.491	118.666	1.35246	0.739394	0.441605	0.433495	0.62616	139.579	0.56383	0.783225		Ser-GCU	11987.4	12807.1	0.935996	1.06838	-0.0952089	0.46924	0.704884	12397.3	0.131555	-0.723717		Arg-ACG	66380.4
Ser-GGA	7422.77	7847.67	0.945856	1.05724	-0.0807565	0.544993	0.77529	7635.22	0.13342	-0.60528		Val-UAC	56219.9	58590.4	0.959541	1.04216	-0.0595377	0.246112	0.383935	57405.1	0.0513325	-1.15985		Thr-UGU	11390.7	12162	0.936584	1.06771	-0.0943945	0.415337	0.62616	11776.3	0.115887	-0.814538		Ala-UGC	104725	113164	0.925427	1.08058	-0.111785	0.458194	0.704884	108945	0.150689	-0.741824		Leu-UAG	6174.3
Cys-GCA	17235.6	18374	0.938044	1.06605	-0.0924071	0.524972	0.77529	17804.8	0.145363	-0.6357		Leu-CAG	52094.3	55598.6	0.936972	1.06727	-0.0940305	0.296531	0.444796	53846.4	0.090076	-1.0439		Leu-GAG	2065.5	2218.28	0.931129	1.07397	-0.104292	0.432577	0.62616	2141.89	0.132891	-0.78479		Thr-GGU	2316.96	2661.63	0.870504	1.14876	-0.200704	0.469922	0.704884	2489.3	0.27775	-0.722605		Gly-GCC	141390
His-GUG	974.397	1062.47	0.917104	1.09039	-0.119806	0.538345	0.77529	1018.43	0.194706	-0.615318		Ile2-CAU	28.3936	20.7228	1.37016	0.729841	0.457804	0.362921	0.49355	24.5582	0.503184	0.909814		Ser-CGA	0.31232	1.07512	0.290498	3.44236	-1.30621	0.390238	0.62616	0.69372	1.52029	-0.859186		Leu-GAG	2080.33	1952.7	1.06536	0.938646	0.0903232	0.646519	0.83338	2016.51	0.196953	0.458603		Thr-UGU	11176.2
Thr-GGU	2084.85	2276.28	0.915904	1.09182	-0.124306	0.556619	0.77529	2180.57	0.211451	-0.587871		Leu-GAG	2269.93	2036.37	1.11469	0.897108	0.15587	0.366999	0.49355	2153.15	0.172784	0.902109		Ser-GCU	13419.5	14117.5	0.950556	1.05202	-0.0736002	0.480336	0.669039	13768.5	0.104285	-0.705762		Thr-UGU	14168	13402.5	1.05711	0.945976	0.0800244	0.683167	0.83338	13785.2	0.196068	0.408145		Ser-CGA	1.16047
Leu-CAA	24500	23127.8	1.05933	0.943989	0.0829245	0.596754	0.802531	23813.9	0.156735	0.529075		Arg-ACG	67108.2	73815.9	0.90913	1.09995	-0.137394	0.347684	0.49355	70462.1	0.146306	-0.939091		Arg-UCU	1800.81	1742.4	1.03352	0.967567	0.0445427	0.571053	0.767968	1771.61	0.0786277	0.566501		Tyr-GUA	12072.7	11564.5	1.04395	0.957902	0.0618612	0.623819	0.83338	11818.6	0.126133	0.490445		Arg-CCU	854.052
Leu-GAG	2042.31	2155.05	0.947686	1.0552	-0.0774978	0.6402	0.805413	2098.68	0.165799	-0.467419		Gly-CCC	6525.31	6182.18	1.0555	0.947415	0.0777877	0.517596	0.672875	6353.74	0.120218	0.647055		Trp-CCA	50196.4	48816.3	1.02827	0.972505	0.0401359	0.691011	0.898314	49506.4	0.100975	0.397483		Gly-CCC	6162.43	6420.02	0.959877	1.0418	-0.0592028	0.683799	0.83338	6291.22	0.14536	-0.407284		Val-GAC	30470.8
Arg-ACG	72967.6	78200.7	0.933081	1.07172	-0.0998732	0.6275	0.805413	75584.2	0.205818	-0.485249		Thr-GGU	2476.09	2149.53	1.15192	0.868114	0.204527	0.62217	0.777812	2312.81	0.41505	0.492777		Leu-CAA	24705.6	23819.8	1.03719	0.964146	0.0525711	0.730428	0.918926	24262.7	0.152576	0.344556		Leu-UAG	6597.41	6915.22	0.954042	1.04817	-0.0682336	0.663151	0.83338	6756.32	0.156654	-0.435568		Ala-UGC	111959
Arg-UCU	1630.94	1692.88	0.96341	1.03798	-0.0547088	0.695349	0.821776	1661.91	0.139703	-0.391607		His-GUG	1073.1	1003.01	1.06988	0.93468	0.0994336	0.638205	0.777812	1038.05	0.211466	0.470211		fMet-CAU	5318.08	5215.11	1.01974	0.980638	0.0294609	0.787206	0.959408	5266.59	0.109139	0.26994		Glu-UUC	80.045	98.7196	0.810832	1.2333	-0.295324	0.5874	0.83338	89.3823	0.544268	-0.542608		Asp-GUC	91453.8
Tyr-GUA	14038.8	14678.5	0.95642	1.04557	-0.0646491	0.677142	0.821776	14358.7	0.15527	-0.416366		Ser-CGA	1.61336	0.983237	1.64087	0.609434	0.822879	0.706797	0.792954	1.2983	2.18757	0.376161		Gly-CCC	6808.73	6745.48	1.00938	0.99071	0.012929	0.907996	0.985144	6777.1	0.111874	0.115567		fMet-CAU	6996.75	6284.93	1.11326	0.898265	0.154743	0.75019	0.860511	6640.84	0.486019	0.318389		Tyr-GUA	11267.5
Gly-CCC	6759.5	6552.08	1.03166	0.969313	0.0448646	0.760689	0.872555	6655.79	0.147302	0.304576		Asn-GUU	18761.6	17834.2	1.052	0.950573	0.0730407	0.711626	0.792954	18297.9	0.197582	0.369674		Val-GAC	33156.6	32878.7	1.00845	0.991619	0.0120989	0.926572	0.985144	33017.6	0.131283	0.0921591		Arg-ACG	71583.6	73700.4	0.971278	1.02957	-0.0420568	0.743814	0.860511	72642	0.12869	-0.326806		Lys-UUU	80896.3
Ser-CGA	0.600633	1.0467	0.573834	1.74266	-0.356055	0.78678	0.876698	0.823667	1.31631	-0.270495		Tyr-GUA	13342.1	13862.1	0.962488	1.03897	-0.055557	0.677117	0.792954	13602.1	0.133422	-0.416401		Ser-GGA	8141.65	8080.84	1.00753	0.992531	0.0102635	0.92846	0.985144	8111.25	0.114315	0.0897826		Trp-CCA	38719.9	39533	0.979432	1.021	-0.0299011	0.85662	0.954519	39126.5	0.165493	-0.180679		Ile-GAU	42200.4
Ser-GCU	13508.9	13715.2	0.984962	1.01527	-0.0221328	0.858334	0.880922	13612.1	0.123997	-0.178495		Glu-UUC	118.469	108.684	1.09002	0.917411	0.137288	0.755626	0.809992	113.576	0.441115	0.31123		Ala-UGC	123173	123071	1.00083	0.999169	0.00125819	0.983202	0.985144	123122	0.059758	0.0210548		Leu-CAG	50106.7	50711.5	0.988074	1.01207	-0.0173089	0.893663	0.968135	50409.1	0.12949	-0.13367		Pro-UGG	2682.72
Leu-UAG	6955.04	7090.37	0.980913	1.01946	-0.02737	0.816039	0.880922	7022.71	0.117648	-0.232643		Ile-GAU	45856.2	44945.4	1.02026	0.980138	0.0287578	0.789223	0.809992	45400.8	0.107579	0.267319		Tyr-GUA	15090	15115.9	0.998288	1.00171	-0.00276006	0.985144	0.985144	15102.9	0.148228	-0.0186204		Ser-CGA	1.19094	0.939853	1.26716	0.789166	0.251829	0.924965	0.974963	1.0654	2.67386	0.0941819		Leu-CAA	19077.2
Asn-GUU	18420.5	18869.4	0.976214	1.02437	-0.034877	0.850574	0.880922	18644.9	0.185136	-0.188386		Leu-CAA	21061.2	21824	0.965045	1.03622	-0.0514762	0.77713	0.809992	21442.6	0.181856	-0.283061		Arg-CCG	5688.87	5728.37	0.993105	1.00694	-0.00928117	0.937201	0.985144	5708.62	0.117799	-0.078788		Asp-GUC	93279	93862.6	0.993783	1.00626	-0.00897157	0.950259	0.975265	93570.8	0.143816	-0.0623821		fMet-CAU	5691.2
Ile-GAU	47694.7	47623	1.00151	0.998497	0.00200146	0.987544	0.987544	47658.8	0.128196	0.0156125		Ser-GGA	7326.6	7411.43	0.988553	1.01158	-0.0168822	0.895267	0.895267	7369.02	0.128242	-0.131643		Leu-UAG	7222.9	7295.08	0.990105	1.00999	-0.0138983	0.871568	0.985144	7258.99	0.0859686	-0.161668		Arg-UCU	1409.96	1413.05	0.997814	1.00219	-0.00276313	0.987886	0.987886	1411.5	0.181985	-0.0151833		Pro-GGG	5391.89
[truncated: 22 more columns]

## Sheet: fig5_suppfig1
Pairwise comparisons of the expression levels of tRNA types in the mature tRNA pool. Using the aligned YAMAT-seq read data (supplemental file 7) as input, DESeq2 output consists of: baseMean1 and baseMean2 (the normalized mean expression level of three replicates of strain 1 and strain 2); fold.change1 and fold.change2 (fold change calculated by baseMean1/baseMean2 or baseMean2/baseMean1, respect…
Comparisons 1-4 are M1-L (strain 1) versus the other 4 Day13 isolates from mutant lineages (M2-L, M2-Lop, M3-L, M4-L; strain 2)
1: M1-L (strain 1) versus M2-L (strain 2)												2: M1-L (strain 1) versus M2-Lop (strain 2)												3:M1-L (strain 1) versus M3-L (strain 2)												4: M1-L (strain 1) versus M4-L (strain 2)
Result: 1 tRNA higher in M1-L (Ala-UGC)												Result: 1 tRNA higher in M2-Lop (Asn-GUU)												Result: no signficant difference in tRNA expression detected												Result: no signficant difference in tRNA expression detected
contig	baseMean_strain1	baseMean_strain2	Fold.change1 (strain1/strain2)	Fold.change2 (strain2/strain1)	log2FoldChange	pvalue	padj	baseMean	lfcSE	stat	notes	contig	baseMean_strain1	baseMean_strain2	Fold.change1 (strain1/strain2)	Fold.change2 (strain2/strain1)	log2FoldChange	pvalue	padj	baseMean	lfcSE	stat	notes	contig	baseMean_strain1	baseMean_strain2	Fold.change1 (strain1/strain2)	Fold.change2 (strain2/strain1)	log2FoldChange	pvalue	padj	baseMean	lfcSE	stat	notes	contig	baseMean_strain1	baseMean_strain2	Fold.change1 (strain1/strain2)	Fold.change2 (strain2/strain1)	log2FoldChange	pvalue	padj	baseMean	lfcSE	stat	notes
Ala-UGC	111990	98386.3	1.13827	0.878526	0.186844	8.03887e-05	0.00313516	105188	0.0473833	3.94324	higher expression in M1-L (strain 1) than M2-L (strain 2)	Asn-GUU	17276	24196.4	0.713989	1.40058	-0.486014	0.00017616	0.00687025	20736.2	0.129571	-3.75096	higher expression in M2-Lop (strain 2) than M1-L (strain 1)	Ala-UGC	127422	115087	1.10718	0.903198	0.146826	0.00702	0.27378	121254	0.0544629	2.69589		Ser-UGA	13275.1	10428.2	1.273	0.785548	0.347932	0.0124961	0.373161	11851.7	0.139294	2.49781
Ala-GGC	66439.5	59427.1	1.118	0.894455	0.16091	0.00415411	0.0810051	62933.3	0.0561403	2.86622		Gln-UUG	1126.33	1649.23	0.682943	1.46425	-0.546992	0.000890182	0.0173585	1387.78	0.164602	-3.32312		Ser-UGA	13689.7	11171.9	1.22537	0.816077	0.292914	0.0241081	0.470108	12430.8	0.129872	2.2554		Gln-UUG	1150.89	1818.24	0.632967	1.57986	-0.6586	0.0191365	0.373161	1484.56	0.281109	-2.34286
Gly-GCC	127161	116093	1.09533	0.912963	0.131419	0.0176209	0.229071	121627	0.0553694	2.37349		fMet-CAU	6587.57	4882.45	1.34923	0.741162	0.432499	0.0106001	0.0826809	5735.01	0.169235	2.55561		Leu-CAA	24222.9	20191.5	1.19966	0.833572	0.262447	0.0588461	0.573749	22207.2	0.138909	1.88934		Ser-GGA	7115.88	6450.41	1.10317	0.906482	0.141693	0.275122	0.894146	6783.14	0.129833	1.09134
Thr-UGU	11414.5	14587.1	0.782505	1.27795	-0.353556	0.0286643	0.279477	13000.8	0.161583	-2.18807		Ala-GGC	71732	63567.3	1.12844	0.886177	0.1743	0.0103377	0.0826809	67649.7	0.0679709	2.56432		Ala-GGC	75606.4	68814	1.09871	0.910161	0.135827	0.0588399	0.573749	72210.2	0.0718896	1.88939		Lys-UUU	83761	90545.7	0.925069	1.081	-0.112377	0.273787	0.894146	87153.4	0.102685	-1.09438
Met-CAU	2984.22	3648.32	0.817972	1.22254	-0.289285	0.0450639	0.351499	3316.27	0.14435	-2.00406		Glu-UUC	56.8734	147.512	0.385551	2.59369	-1.37172	0.00947077	0.0826809	102.193	0.528686	-2.59458		Ile-GAU	47163.2	41634.5	1.13279	0.882776	0.179749	0.135325	0.641174	44398.8	0.12036	1.49343		Asp-GUC	92959.7	102511	0.906824	1.10275	-0.141109	0.241703	0.894146	97735.5	0.12053	-1.17074
fMet-CAU	6087.76	7801.35	0.780347	1.28148	-0.357549	0.0554911	0.360692	6944.56	0.186709	-1.91501		Arg-CCG	6532.5	5222.18	1.25091	0.799416	0.323808	0.0132766	0.0862978	5877.34	0.130765	2.47626		Asp-GUC	95847.3	102534	0.934781	1.06977	-0.0973577	0.197284	0.641174	99190.9	0.0755104	-1.28933		Trp-CCA	43388	48288.3	0.898522	1.11294	-0.1544	0.268876	0.894146	45838.2	0.139646	-1.10566
Leu-GAG	1773.98	2096.11	0.846317	1.18159	-0.239543	0.0707942	0.394425	1935.04	0.132579	-1.8068		Arg-ACG	68459.8	57110	1.19873	0.834213	0.261607	0.0249549	0.139034	62784.9	0.11668	2.2421		Val-UAC	58073.1	63298.4	0.917449	1.08998	-0.124304	0.120287	0.641174	60685.7	0.0800121	-1.55357		Gly-GCC	140351	158407	0.88601	1.12865	-0.174602	0.194863	0.894146	149379	0.13469	-1.29633
Ser-UGA	12033	10140.1	1.18667	0.842691	0.246676	0.0861822	0.420138	11086.6	0.14376	1.71589		His-GUG	914.356	729.962	1.25261	0.798334	0.32886	0.0502569	0.245002	822.159	0.167977	1.95777		Leu-GAG	2018.72	2287.67	0.882436	1.13323	-0.179664	0.1964	0.641174	2153.2	0.139072	-1.29187		Val-GAC	28581	34126.7	0.837498	1.19403	-0.255865	0.112171	0.894146	31353.8	0.161072	-1.58851
Leu-UAG	6042.4	6769.67	0.89257	1.12036	-0.163867	0.10471	0.453743	6406.03	0.101001	-1.62244		Thr-GGU	1956.95	1611.1	1.21467	0.823269	0.28269	0.0702873	0.304578	1784.02	0.156177	1.81005		His-GUG	962.59	1126.45	0.854533	1.17023	-0.223053	0.144041	0.641174	1044.52	0.152681	-1.46091		Arg-UCU	1563.56	1903.44	0.821439	1.21738	-0.283731	0.21247	0.894146	1733.5	0.227567	-1.2468
Trp-CCA	39332.6	35962.7	1.0937	0.914325	0.129157	0.138295	0.528389	37647.6	0.0871403	1.48217		Thr-UGU	12350.3	10455.1	1.18127	0.846543	0.240769	0.129063	0.432284	11402.7	0.158629	1.51781		Thr-UGU	12997.9	15600.6	0.833169	1.20024	-0.263041	0.152649	0.641174	14299.3	0.183915	-1.43024		Pro-GGG	4941.23	6037.21	0.818463	1.2218	-0.289067	0.143973	0.894146	5489.22	0.197835	-1.46115
Glu-UUC	52.9062	109.45	0.483381	2.06876	-1.04826	0.149033	0.528389	81.1782	0.726468	-1.44296		Ala-UGC	120857	113091	1.06867	0.935743	0.0957643	0.136672	0.432284	116974	0.0643448	1.4883		Gln-UUG	1187.05	1432.52	0.828648	1.20678	-0.268892	0.107953	0.641174	1309.78	0.167278	-1.60746		Asn-GUU	17660.6	21839	0.808676	1.23659	-0.306301	0.103241	0.894146	19749.8	0.187991	-1.62934
Ser-GCU	11738.5	10533.3	1.11441	0.897334	0.156117	0.209329	0.578011	11135.9	0.124355	1.25541		Trp-CCA	42424.2	46075.5	0.920754	1.08607	-0.119295	0.144095	0.432284	44249.9	0.0816694	-1.46071		Thr-GGU	2060.07	2553.38	0.8068	1.23946	-0.308232	0.178614	0.641174	2306.72	0.229162	-1.34504		Glu-UUC	58.1353	155.126	0.374762	2.66836	-1.41393	0.130961	0.894146	106.631	0.936177	-1.51032
Asp-GUC	84232.6	78804	1.06889	0.935552	0.0962091	0.207577	0.578011	81518.3	0.0763409	1.26026		Met-CAU	3224.43	3658.8	0.881281	1.13471	-0.180566	0.126686	0.432284	3441.61	0.118226	-1.5273		Cys-GCA	17039	15523.2	1.09764	0.911042	0.134218	0.273379	0.710785	16281.1	0.122539	1.09531		Ile2-CAU	27.7169	23.8747	1.16093	0.861376	0.202901	0.581858	0.975412	25.7958	0.36846	0.550672
His-GUG	845.448	990.815	0.853286	1.17194	-0.226008	0.217558	0.578011	918.131	0.183292	-1.23305		Val-UAC	55099.8	50541.4	1.09019	0.91727	0.124585	0.166837	0.46476	52820.6	0.0901198	1.38244		Arg-ACG	72095.3	78746.4	0.915538	1.09225	-0.127231	0.240167	0.710785	75420.9	0.108321	-1.17457		Leu-CAA	23486.7	21327.1	1.10126	0.90805	0.139057	0.375661	0.975412	22406.9	0.156964	0.885919
Ser-CGA	0.522208	1.49231	0.349932	2.8577	-1.49345	0.222312	0.578011	1.00726	1.22374	-1.2204		Ser-UGA	12978.4	11663.3	1.11275	0.898672	0.153833	0.211418	0.51307	12320.9	0.123098	1.24968		Arg-CCU	992.355	1118.42	0.887281	1.12704	-0.169402	0.256718	0.710785	1055.39	0.14936	-1.13418		Leu-GAG	1957.95	1796.57	1.08983	0.917577	0.124152	0.608134	0.975412	1877.26	0.242134	0.51274
Lys-UUU	75898.9	71997.3	1.05419	0.948594	0.076099	0.245388	0.598132	73948.1	0.0655107	1.16163		Gly-GCC	137272	131547	1.04352	0.958297	0.0614549	0.223646	0.51307	134410	0.0505016	1.21689		Pro-UGG	2750.05	2387.84	1.15169	0.86829	0.204169	0.326062	0.794777	2568.95	0.207895	0.982076		Tyr-GUA	13458.6	12587.6	1.0692	0.935283	0.0963293	0.556187	0.975412	13023.1	0.163682	0.588514
Cys-GCA	14976.5	13488	1.11036	0.900608	0.151005	0.264133	0.605953	14232.3	0.135227	1.11668		Ser-GGA	6960.66	7470.3	0.931778	1.07322	-0.102061	0.219233	0.51307	7215.48	0.0830732	-1.22857		Ser-GGA	7335.93	6738.92	1.08859	0.918618	0.122676	0.372584	0.811364	7037.43	0.137584	0.891643		Arg-CCG	6674.34	6296.19	1.06006	0.943342	0.0844726	0.633628	0.975412	6485.26	0.17723	0.476627
Leu-CAA	21293.1	19455.5	1.09445	0.913699	0.130136	0.336586	0.729269	20374.3	0.135427	0.960934		Thr-CGU	378.73	332.876	1.13775	0.878926	0.189164	0.275523	0.515962	355.803	0.173476	1.09043		Trp-CCA	44746.3	42535.1	1.05199	0.950584	0.0729998	0.535988	0.811364	43640.7	0.117953	0.618891		fMet-CAU	6729.6	6370.04	1.05645	0.946571	0.0792608	0.859285	0.975412	6549.82	0.447084	0.177284
Thr-CGU	350.495	324.492	1.08013	0.92581	0.112109	0.518012	0.742758	337.494	0.173432	0.646413		Arg-UCU	1529.06	1652.62	0.925232	1.08081	-0.112129	0.277826	0.515962	1590.84	0.103324	-1.08522		Leu-UAA	1381.08	1456.68	0.948099	1.05474	-0.0765388	0.561713	0.811364	1418.88	0.131896	-0.580298		Ala-GGC	73333.5	70214.8	1.04442	0.957472	0.0626957	0.496523	0.975412	71774.1	0.0922036	0.67997
Pro-GGG	4482.8	4225.24	1.06096	0.942545	0.0847528	0.553937	0.742758	4354.02	0.143195	0.591872		Val-GAC	27947.7	30447.5	0.9179	1.08944	-0.123787	0.267716	0.515962	29197.6	0.111687	-1.10834		Leu-UAG	6875.32	7256.52	0.947468	1.05545	-0.0776466	0.518715	0.811364	7065.92	0.120321	-0.645327		Gly-CCC	6479.95	6230.63	1.04001	0.961525	0.0566277	0.716066	0.975412	6355.29	0.15569	0.363721
Arg-CCG	6042.03	5699.89	1.06003	0.943374	0.0845228	0.540504	0.742758	5870.96	0.138098	0.61205		Ile-GAU	44690.6	49000.3	0.912048	1.09643	-0.132939	0.238912	0.515962	46845.5	0.112879	-1.17771		Leu-CAG	51876.7	55040.8	0.942513	1.06099	-0.0854963	0.437176	0.811364	53458.8	0.110038	-0.776971		Thr-GGU	1998.85	1928.08	1.0367	0.964595	0.0524596	0.866238	0.975412	1963.47	0.311445	0.168439
Arg-UCU	1417.67	1337.71	1.05978	0.943594	0.0835002	0.534281	0.742758	1377.69	0.134356	0.621485		Pro-GGG	4831.76	5198.5	0.929452	1.0759	-0.106051	0.439484	0.779084	5015.13	0.137182	-0.773066		Asn-GUU	18218.3	19557.4	0.931531	1.0735	-0.102355	0.556766	0.811364	18887.8	0.174176	-0.587651		Ser-GCU	12950.3	12550.1	1.03189	0.969096	0.0452398	0.752328	0.975412	12750.2	0.143359	0.315571
Val-GAC	25915.1	24689.5	1.04964	0.952705	0.0697483	0.506885	0.742758	25302.3	0.105091	0.663697		Cys-GCA	16157	15524.4	1.04075	0.960847	0.0574158	0.546488	0.926653	15840.7	0.0952119	0.603032		Thr-CGU	398.964	433.166	0.921043	1.08573	-0.11644	0.461822	0.811364	416.065	0.158239	-0.73585		Ala-UGC	123569	125402	0.985383	1.01483	-0.0212404	0.86125	0.975412	124486	0.121524	-0.174783
Ser-GGA	6446.11	6769.04	0.952293	1.0501	-0.0708775	0.518435	0.742758	6607.58	0.109758	-0.645759		Ser-CGA	0.565164	0.289622	1.95138	0.512457	0.819938	0.761572	0.949444	0.427393	2.70234	0.303417		Met-CAU	3396.42	3766.65	0.90171	1.109	-0.148263	0.389154	0.811364	3581.53	0.172168	-0.861153		Thr-CGU	387.087	398.308	0.971829	1.02899	-0.0405781	0.875369	0.975412	392.698	0.25872	-0.156842
Leu-UAA	1213.51	1276.61	0.950576	1.05199	-0.0734347	0.571353	0.742758	1245.06	0.129729	-0.566061		Arg-CCU	942.412	898.595	1.04876	0.953505	0.0727383	0.621344	0.949444	920.503	0.147259	0.493947		Phe-GAA	52.8957	66.5127	0.795272	1.25743	-0.300529	0.39559	0.811364	59.7042	0.353762	-0.849523		Leu-UAA	1339.71	1378.32	0.971988	1.02882	-0.0410684	0.836682	0.975412	1359.01	0.199227	-0.206139
Leu-CAG	45604	48113.5	0.947844	1.05503	-0.077277	0.387753	0.742758	46858.8	0.089472	-0.8637		Ser-GCU	12663.8	12311.3	1.02863	0.972169	0.0407857	0.632968	0.949444	12487.5	0.0854057	0.477553		Glu-UUC	60.0861	87.5998	0.685916	1.4579	-0.543863	0.512822	0.811364	73.843	0.831023	-0.65445		Leu-CAG	50296.1	51810.4	0.970771	1.03011	-0.0428392	0.675852	0.975412	51053.3	0.102454	-0.41813
Gly-UCC	15478.2	16509.4	0.937536	1.06663	-0.0930085	0.402472	0.742758	15993.8	0.111093	-0.837215		Gly-CCC	6339.68	6246.57	1.01491	0.985312	0.0216696	0.851787	0.949444	6293.12	0.11598	0.186839		Ser-CGA	0.594249	1.31911	0.450491	2.2198	-0.865943	0.501336	0.811364	0.956682	1.28786	-0.672388		Ile-GAU	45721.3	47239.5	0.96786	1.03321	-0.0472141	0.733192	0.975412	46480.4	0.138506	-0.340883
Gln-UUG	1043.41	1125.64	0.926949	1.07881	-0.108175	0.537262	0.742758	1084.53	0.175336	-0.616958		Leu-CAA	22963.2	22669.6	1.01295	0.987214	0.0182245	0.85115	0.949444	22816.4	0.0971189	0.187652		Gly-GCC	144702	141952	1.01938	0.980992	0.0276294	0.589932	0.821691	143327	0.0512667	0.538934		Met-CAU	3294.57	3410.22	0.966088	1.0351	-0.0492456	0.795691	0.975412	3352.39	0.190191	-0.258927
Asn-GUU	16016.6	17333.6	0.92402	1.08223	-0.114089	0.433302	0.742758	16675.1	0.145604	-0.783554		Leu-GAG	1915.59	1895.4	1.01065	0.989462	0.0181092	0.839734	0.949444	1905.49	0.0895456	0.202234		Tyr-GUA	13884	13269.3	1.04632	0.95573	0.0651137	0.632535	0.822296	13576.7	0.136175	0.478162		Gly-UCC	17086.5	17686.2	0.966093	1.0351	-0.0497557	0.690843	0.975412	17386.3	0.125105	-0.397711
Thr-GGU	1809.56	2286.74	0.791329	1.2637	-0.337505	0.399439	0.742758	2048.15	0.400541	-0.842624		Pro-UGG	2607.12	2584.1	1.00891	0.99117	0.0133162	0.91977	0.949444	2595.61	0.132206	0.100723		Lys-UUU	86363.9	84419.7	1.02303	0.977488	0.0327816	0.632212	0.822296	85391.8	0.0684924	0.478616		Leu-UAG	6667.68	6910.47	0.964868	1.03641	-0.0515234	0.661833	0.975412	6789.07	0.117799	-0.437384
Phe-GAA	46.4537	43.545	1.0668	0.937385	0.103539	0.770032	0.849934	44.9994	0.354181	0.292333		Leu-UAA	1310.51	1302.25	1.00634	0.993696	0.0105785	0.913688	0.949444	1306.38	0.0975989	0.108388		Arg-UCU	1612.69	1550.29	1.04025	0.961307	0.0563561	0.680103	0.855613	1581.49	0.136679	0.412323		Val-UAC	56330.4	59251.8	0.950696	1.05186	-0.0729439	0.461878	0.975412	57791.1	0.0991412	-0.735758
Pro-UGG	2417.86	2329.01	1.03815	0.96325	0.0531337	0.702588	0.849934	2373.43	0.139155	0.38183		Asp-GUC	90914.5	90269.1	1.00715	0.992901	0.0103558	0.896196	0.949444	90591.8	0.0793739	0.130469		Ile2-CAU	28.58	26.0182	1.09846	0.910363	0.138377	0.751095	0.887658	27.2991	0.436251	0.317195		Arg-ACG	69953.1	74403.2	0.94019	1.06361	-0.0889302	0.547292	0.975412	72178.2	0.147768	-0.601823
Arg-ACG	63331.6	61972.5	1.02193	0.978539	0.0314278	0.734091	0.849934	62652	0.0925195	0.339689		Gly-UCC	16713.2	16800.4	0.994806	1.00522	-0.00743998	0.925099	0.949444	16756.8	0.0791378	-0.094013		fMet-CAU	6932.76	7716.8	0.898398	1.11309	-0.154471	0.732748	0.887658	7324.78	0.452367	-0.341473		Pro-UGG	2665.75	3004.72	0.887188	1.12716	-0.172604	0.381176	0.975412	2835.24	0.197097	-0.875731
Val-UAC	51029.7	51926.2	0.982735	1.01757	-0.0251346	0.707255	0.849934	51478	0.0669283	-0.375545		Leu-CAG	49183.7	49596.2	0.991682	1.00839	-0.0120764	0.885593	0.949444	49390	0.083932	-0.143883		Ser-GCU	13354.9	13176.2	1.01357	0.986614	0.0192643	0.87027	0.925678	13265.6	0.117958	0.163315		Phe-GAA	51.3337	59.1771	0.86746	1.15279	-0.18187	0.605096	0.975412	55.2554	0.35172	-0.517086
Ile-GAU	41466.4	42346	0.979228	1.02121	-0.0303499	0.784554	0.849934	41906.2	0.111014	-0.273389		Leu-UAG	6522.22	6627.15	0.984167	1.01609	-0.0226169	0.75629	0.949444	6574.68	0.0728738	-0.310357		Gly-UCC	17614.8	17792.7	0.990001	1.0101	-0.0145514	0.901943	0.925678	17703.7	0.118104	-0.123208		Ser-CGA	0.576109	1.30754	0.440604	2.26961	-0.984303	0.493009	0.975412	0.941825	1.43583	-0.68553
Gly-CCC	5866.98	6028.54	0.9732	1.02754	-0.0392567	0.753826	0.849934	5947.76	0.125181	-0.313599		Tyr-GUA	13158.4	13837	0.950954	1.05158	-0.0726876	0.596684	0.949444	13497.7	0.13736	-0.529175		Gly-CCC	6678.49	6776.56	0.985528	1.01468	-0.0207897	0.878552	0.925678	6727.53	0.136054	-0.152805		His-GUG	934.144	920.044	1.01533	0.984906	0.0229782	0.931667	0.985294	927.094	0.267976	0.0857475
Ile2-CAU	25.1184	26.2368	0.957371	1.04453	-0.0921376	0.806396	0.849985	25.6776	0.375952	-0.245078		Phe-GAA	50.2797	57.9914	0.86702	1.15338	-0.180876	0.668959	0.949444	54.1356	0.423025	-0.427576		Pro-GGG	5098.09	5185.61	0.983121	1.01717	-0.024935	0.891685	0.925678	5141.85	0.183115	-0.136172		Thr-UGU	12615.8	12515.4	1.00802	0.992044	0.0116353	0.96122	0.985294	12565.6	0.239297	0.0486229
Arg-CCU	871.638	892.713	0.976392	1.02418	-0.0343866	0.834766	0.856733	882.176	0.16485	-0.208593		Ile2-CAU	27.1056	30.5679	0.886733	1.12774	-0.188225	0.728233	0.949444	28.8368	0.541691	-0.347477		Arg-CCG	6878.44	7049.22	0.975773	1.02483	-0.0348309	0.815095	0.925678	6963.83	0.14894	-0.233859		Arg-CCU	962.994	955.916	1.0074	0.99265	0.0114175	0.962902	0.985294	959.455	0.245476	0.0465117
Tyr-GUA	12207.3	12322.5	0.990648	1.00944	-0.0136851	0.918606	0.918606	12264.9	0.133919	-0.10219		Lys-UUU	81920.7	81995.6	0.999087	1.00091	-0.00144959	0.978845	0.978845	81958.2	0.0546673	-0.0265166		Val-GAC	29479.4	29359.5	1.00408	0.995933	0.00576644	0.968236	0.968236	29419.4	0.144809	0.0398209		Cys-GCA	16522.8	16491.6	1.00189	0.99811	0.00263454	0.985294	0.985294	16507.2	0.142934	0.0184318
Comparisons 5-8 are M2-L (strain 1) versus the other 4 Day13 isolates from mutant lineages (M1-L, M2-Lop, M3-L, M4-L; strain 2)
5: M2-L (strain 1) versus M1-L (strain 2)												6: M2-L (strain 1) versus M2-Lop (strain 2)												7: M2-L (strain 1) versus M3-L (strain 2)												8: M2-L (strain 1) versus M4-L (strain 2)
Result: 1 tRNA higher in M1-L (Ala-UGC)												Result: 2 tRNAs more highly expressed in M2-L (fMet-CAU and Thr-UGU); 3 tRNAs more highly expressed in M2-Lop (Gln-UUG, Asn-GUU, Trp-CCA)												Result: no signficant difference in tRNA expression detected												Result: no signficant difference in tRNA expression detected
contig	baseMean_strain1	baseMean_strain2	Fold.change1 (strain1/strain2)	Fold.change2 (strain2/strain1)	log2FoldChange	pvalue	padj	baseMean	lfcSE	stat	notes	contig	baseMean_strain1	baseMean_strain2	Fold.change1 (strain1/strain2)	Fold.change2 (strain2/strain1)	log2FoldChange	pvalue	padj	baseMean	lfcSE	stat	notes	contig	baseMean_strain1	baseMean_strain2	Fold.change1 (strain1/strain2)	Fold.change2 (strain2/strain1)	log2FoldChange	pvalue	padj	baseMean	lfcSE	stat	notes	contig	baseMean_strain1	baseMean_strain2	Fold.change1 (strain1/strain2)	Fold.change2 (strain2/strain1)	log2FoldChange	pvalue	padj	baseMean	lfcSE	stat	notes
Ala-UGC	98386.3	111990	0.878526	1.13827	-0.186844	8.03887e-05	0.00313516	105188	0.0473833	-3.94324	higher expression in M1-L than M2-L	fMet-CAU	8078.79	4662.26	1.7328	0.577099	0.793104	0.00117278	0.00914769	6370.53	0.244376	3.24542	higher expression in strain 1 than strain 2	Ile-GAU	45707.5	39492.2	1.15738	0.86402	0.210679	0.00924166	0.360425	42599.9	0.0809376	2.60298		Ser-GGA	7180.3	5996.72	1.19737	0.835163	0.260095	0.0629173	0.43305	6588.51	0.139853	1.85978
Ala-GGC	59427.1	66439.5	0.894455	1.118	-0.16091	0.00415411	0.0810051	62933.3	0.0561403	-2.86622		Thr-UGU	15083.1	9982.47	1.51096	0.66183	0.595719	6.00749e-08	2.34292e-06	12532.8	0.10994	5.41858	higher expression in strain 1 than strain 2	Val-UAC	56025.3	60023.1	0.933396	1.07136	-0.0994656	0.0411083	0.576139	58024.2	0.0486995	-2.04244		Trp-CCA	38158.4	44789.1	0.851958	1.17377	-0.231162	0.0635508	0.43305	41473.7	0.124594	-1.85532
Gly-GCC	116093	127161	0.912963	1.09533	-0.131419	0.0176209	0.229071	121627	0.0553694	-2.37349		Gln-UUG	1163.53	1574.66	0.738912	1.35334	-0.434198	0.00104405	0.00914769	1369.1	0.132443	-3.27838	higher expression in strain 2 than strain 1	Thr-CGU	350.035	410.536	0.852629	1.17284	-0.229002	0.0443184	0.576139	380.285	0.113871	-2.01107		Gly-GCC	123189	146962	0.838233	1.19299	-0.254587	0.0648263	0.43305	135076	0.137879	-1.84645
Thr-UGU	14587.1	11414.5	1.27795	0.782505	0.353556	0.0286643	0.279477	13000.8	0.161583	2.18807		Asn-GUU	17910.2	23116.6	0.774777	1.29069	-0.367972	9.85773e-05	0.00185563	20513.4	0.0944956	-3.89407	higher expression in strain 2 than strain 1	Asp-GUC	85067.8	97204.3	0.875144	1.14267	-0.192494	0.0698479	0.681017	91136	0.10618	-1.8129		Val-GAC	26191.2	31639.6	0.827796	1.20803	-0.272613	0.0402396	0.43305	28915.4	0.132899	-2.05128
Met-CAU	3648.32	2984.22	1.22254	0.817972	0.289285	0.0450639	0.351499	3316.27	0.14435	2.00406		Trp-CCA	37118.8	44006.7	0.84348	1.18557	-0.245783	0.000142741	0.00185563	40562.7	0.0646224	-3.80337	higher expression in strain 2 than strain 1	Ser-GGA	7304.84	6388.83	1.14338	0.874603	0.193734	0.146481	0.755542	6846.83	0.133419	1.45208		Pro-GGG	4481.68	5596.25	0.800837	1.24869	-0.320152	0.0666231	0.43305	5038.96	0.174545	-1.83421
fMet-CAU	7801.35	6087.76	1.28148	0.780347	0.357549	0.0554911	0.360692	6944.56	0.186709	1.91501		His-GUG	1025.29	696.744	1.47155	0.679558	0.557442	0.00188096	0.0122262	861.017	0.179333	3.10841		Gly-GCC	125310	134648	0.930652	1.07452	-0.10375	0.154983	0.755542	129979	0.0729528	-1.42215		Gln-UUG	1193.85	1685.04	0.7085	1.41143	-0.496401	0.0475715	0.43305	1439.45	0.250559	-1.98118
Leu-GAG	2096.11	1773.98	1.18159	0.846317	0.239543	0.0707942	0.394425	1935.04	0.132579	1.8068		Arg-ACG	64042.3	54519.1	1.17468	0.851299	0.232277	0.00750713	0.0418255	59280.7	0.0868823	2.67347		Arg-ACG	66852.8	74608	0.896054	1.116	-0.158367	0.127482	0.755542	70730.4	0.103908	-1.52411		Leu-GAG	2223.65	1674.19	1.32819	0.752903	0.409164	0.0872366	0.486032	1948.92	0.239255	1.71016
Ser-UGA	10140.1	12033	0.842691	1.18667	-0.246676	0.0861822	0.420138	11086.6	0.14376	-1.71589		Arg-CCG	5893.05	4986.23	1.18187	0.84612	0.241481	0.0255647	0.124628	5439.64	0.108154	2.23276		Gln-UUG	1214.04	1358.15	0.89389	1.11871	-0.159917	0.128814	0.755542	1286.09	0.105292	-1.5188		Met-CAU	3869.01	3173.66	1.2191	0.820278	0.285997	0.130191	0.588485	3521.34	0.188983	1.51335
Leu-UAG	6769.67	6042.4	1.12036	0.89257	0.163867	0.10471	0.453743	6406.03	0.101001	1.62244		Val-GAC	25496.8	29075	0.876932	1.14034	-0.189607	0.0287647	0.124647	27285.9	0.0867091	-2.1867		Phe-GAA	46.906	63.0236	0.744261	1.34361	-0.399248	0.192791	0.835429	54.9648	0.306556	-1.30237		Asp-GUC	83636.7	95229.2	0.878267	1.13861	-0.18731	0.150893	0.588485	89433	0.130404	-1.43638
Glu-UUC	109.45	52.9062	2.06876	0.483381	1.04826	0.149033	0.528389	81.1782	0.726468	1.44296		Leu-GAG	2167.03	1810.42	1.19698	0.835438	0.259259	0.0372029	0.142256	1988.72	0.124433	2.08353		Glu-UUC	117.95	83.3414	1.41526	0.706585	0.500129	0.349063	0.876102	100.645	0.534092	0.936409		Arg-UCU	1419.34	1764.53	0.80437	1.24321	-0.314083	0.144699	0.588485	1591.94	0.215344	-1.45851
Trp-CCA	35962.7	39332.6	0.914325	1.0937	-0.129157	0.138295	0.528389	37647.6	0.0871403	-1.48217		Val-UAC	53632.9	48252.8	1.1115	0.899687	0.152494	0.0435929	0.142256	50942.8	0.0755675	2.01798		Met-CAU	3933.57	3570.19	1.10178	0.907623	0.140422	0.404355	0.876102	3751.88	0.168398	0.833869		Leu-UAG	7181.86	6422.53	1.11823	0.894272	0.161167	0.202522	0.607567	6802.19	0.126465	1.2744
Ser-CGA	1.49231	0.522208	2.8577	0.349932	1.49345	0.222312	0.578011	1.00726	1.22374	1.2204		Pro-GGG	4364.35	4965.8	0.878881	1.13781	-0.186117	0.0437711	0.142256	4665.08	0.0923071	-2.01628		Leu-CAA	21009.3	19167.4	1.09609	0.912332	0.132272	0.384726	0.876102	20088.3	0.152173	0.869222		Lys-UUU	76389	84042.7	0.908931	1.10019	-0.137761	0.190428	0.607567	80215.9	0.105216	-1.30931
His-GUG	990.815	845.448	1.17194	0.853286	0.226008	0.217558	0.578011	918.131	0.183292	1.23305		Thr-GGU	2372.44	1538.41	1.54214	0.648448	0.625106	0.0827385	0.222811	1955.43	0.360289	1.73501		Leu-UAG	7304.62	6882.2	1.06138	0.94217	0.0861084	0.352876	0.876102	7093.41	0.0926868	0.929025		Ala-UGC	104385	116356	0.897119	1.11468	-0.156631	0.189871	0.607567	110370	0.119478	-1.31096
Asp-GUC	78804	84232.6	0.935552	1.06889	-0.0962091	0.207577	0.578011	81518.3	0.0763409	-1.26026		Leu-UAG	6990.88	6331.28	1.10418	0.905648	0.143007	0.0825845	0.222811	6661.08	0.082383	1.73588		Tyr-GUA	13298.8	12590.5	1.05626	0.946738	0.0786625	0.325994	0.876102	12944.6	0.0800868	0.982215		fMet-CAU	8272.84	5948.4	1.39077	0.719028	0.475884	0.309553	0.616239	7110.62	0.468316	1.01616
Ser-GCU	10533.3	11738.5	0.897334	1.11441	-0.156117	0.209329	0.578011	11135.9	0.124355	-1.25541		Arg-UCU	1380.65	1578.34	0.874746	1.14319	-0.193008	0.0856965	0.222811	1479.5	0.112308	-1.71855		Gly-UCC	17819.9	16880.3	1.05566	0.947274	0.0779584	0.387808	0.876102	17350.1	0.0902714	0.8636		Thr-UGU	15472.8	11671.8	1.32565	0.754346	0.406699	0.243578	0.616239	13572.3	0.348771	1.16609
Lys-UUU	71997.3	75898.9	0.948594	1.05419	-0.076099	0.245388	0.598132	73948.1	0.0655107	-1.16163		Ser-CGA	1.5547	0.274569	5.66234	0.176605	2.3799	0.0926677	0.225877	0.914637	1.41535	1.68149		Arg-CCG	6147.17	6679.91	0.920248	1.08666	-0.11969	0.353618	0.876102	6413.54	0.129032	-0.927594		Ile2-CAU	27.8153	22.1841	1.25384	0.797552	0.344879	0.325357	0.616239	24.9997	0.350662	0.98351
Cys-GCA	13488	14976.5	0.900608	1.11036	-0.151005	0.264133	0.605953	14232.3	0.135227	-1.11668		Ala-UGC	101571	107988	0.940569	1.06319	-0.0884584	0.166715	0.361217	104779	0.0639689	-1.38284		Arg-CCU	962.666	1060.23	0.90798	1.10135	-0.135353	0.292545	0.876102	1011.45	0.128595	-1.05255		His-GUG	1050.99	857.061	1.22627	0.815479	0.293994	0.272457	0.616239	954.026	0.267895	1.09742
Leu-CAA	19455.5	21293.1	0.913699	1.09445	-0.130136	0.336586	0.729269	20374.3	0.135427	-0.960934		Ile-GAU	43703.8	46805.2	0.93374	1.07096	-0.0990818	0.161095	0.361217	45254.5	0.0707021	-1.4014		Ser-GCU	11371.9	12504.6	0.90942	1.0996	-0.136999	0.254153	0.876102	11938.3	0.120141	-1.14032		Tyr-GUA	13074.6	11699.3	1.11756	0.89481	0.160174	0.255221	0.616239	12386.9	0.14078	1.13776
Thr-GGU	2286.74	1809.56	1.2637	0.791329	0.337505	0.399439	0.742758	2048.15	0.400541	0.842624		Gly-GCC	119803	125629	0.953619	1.04864	-0.0685696	0.234884	0.445019	122716	0.0577248	-1.18787		Ile2-CAU	28.2861	24.7008	1.14515	0.873247	0.232175	0.515197	0.896852	26.4935	0.356771	0.650768		Ser-UGA	10759.4	9687.12	1.11069	0.900341	0.1514	0.314855	0.616239	10223.3	0.150634	1.00509
Asn-GUU	17333.6	16016.6	1.08223	0.92402	0.114089	0.433302	0.742758	16675.1	0.145604	0.783554		Lys-UUU	74279.9	78334.9	0.948235	1.05459	-0.0767519	0.235447	0.445019	76307.4	0.0646906	-1.18644		fMet-CAU	8407.82	7300.49	1.15168	0.868297	0.203795	0.646639	0.896852	7854.16	0.444543	0.458437		Gly-CCC	6395.1	5793.26	1.10389	0.905891	0.142642	0.33823	0.616239	6094.18	0.148947	0.957669
Gln-UUG	1125.64	1043.41	1.07881	0.926949	0.108175	0.537262	0.742758	1084.53	0.175336	0.616958		Ser-GCU	10862.8	11760.1	0.9237	1.0826	-0.114219	0.239626	0.445019	11311.5	0.0971317	-1.17592		Pro-UGG	2512.79	2263.47	1.11015	0.900778	0.15157	0.455052	0.896852	2388.13	0.202899	0.747019		Asn-GUU	18382.9	20247.1	0.907927	1.10141	-0.139189	0.347622	0.616239	19315	0.148198	-0.939212
Gly-UCC	16509.4	15478.2	1.06663	0.937536	0.0930085	0.402472	0.742758	15993.8	0.111093	0.837215		Gly-UCC	17036	16047.3	1.06162	0.94196	0.0861938	0.26612	0.451246	16541.7	0.0775094	1.11204		Thr-UGU	15731.4	14774.8	1.06474	0.939193	0.0905755	0.592901	0.896852	15253.1	0.169415	0.534636		Pro-UGG	2470.35	2787.45	0.886242	1.12836	-0.173671	0.315771	0.616239	2628.9	0.17312	-1.00319
Leu-CAG	48113.5	45604	1.05503	0.947844	0.077277	0.387753	0.742758	46858.8	0.089472	0.8637		Glu-UUC	113.325	140.727	0.805287	1.24179	-0.30608	0.264865	0.451246	127.026	0.274519	-1.11497		Leu-GAG	2260.79	2168.62	1.0425	0.959231	0.0595351	0.629377	0.896852	2214.71	0.123362	0.482603		Gly-UCC	17517	16424.2	1.06654	0.937612	0.0928662	0.385347	0.626189	16970.6	0.106978	0.868086
Leu-UAA	1276.61	1213.51	1.05199	0.950576	0.0734347	0.571353	0.742758	1245.06	0.129729	0.566061		Leu-CAA	20054.7	21661	0.925843	1.0801	-0.111352	0.280084	0.455136	20857.9	0.103092	-1.08013		Ala-GGC	64129.9	65283.9	0.982323	1.01799	-0.0257061	0.66689	0.896852	64706.9	0.0597231	-0.430421		Leu-CAG	51055.5	48129.3	1.0608	0.942687	0.0850805	0.371558	0.626189	49592.4	0.0952154	0.893559
Ser-GGA	6769.04	6446.11	1.0501	0.952293	0.0708775	0.518435	0.742758	6607.58	0.109758	0.645759		Leu-CAG	49641.4	47368.8	1.04798	0.954221	0.0675347	0.312373	0.487301	48505.1	0.0668491	1.01026		Ala-UGC	106176	109180	0.972487	1.02829	-0.0403056	0.508634	0.896852	107678	0.0609798	-0.660967		Thr-GGU	2423.84	1800.05	1.34654	0.742646	0.429341	0.424818	0.662716	2111.94	0.53796	0.798091
Val-GAC	24689.5	25915.1	0.952705	1.04964	-0.0697483	0.506885	0.742758	25302.3	0.105091	-0.663697		Asp-GUC	81319.8	86188.5	0.943511	1.05987	-0.0839078	0.325407	0.48811	83754.1	0.0853234	-0.983408		Lys-UUU	77716.7	80085.1	0.970426	1.03048	-0.0433424	0.595635	0.896852	78900.9	0.081672	-0.530688		Cys-GCA	14313.7	15303.8	0.935305	1.06917	-0.0965952	0.501581	0.707792	14808.7	0.143742	-0.672004
Arg-UCU	1337.71	1417.67	0.943594	1.05978	-0.0835002	0.534281	0.742758	1377.69	0.134356	-0.621485		Met-CAU	3774.01	3495.19	1.07977	0.926122	0.111385	0.362737	0.523953	3634.6	0.122379	0.910163		Trp-CCA	38814.3	40344.8	0.962064	1.03943	-0.0559003	0.607084	0.896852	39579.6	0.108705	-0.51424		Phe-GAA	46.1547	55.0997	0.837658	1.1938	-0.240837	0.481852	0.707792	50.6272	0.342426	-0.703327
Arg-CCG	5699.89	6042.03	0.943374	1.06003	-0.0845228	0.540504	0.742758	5870.96	0.138098	-0.61205		Cys-GCA	13903.7	14835.8	0.937168	1.06705	-0.0937519	0.398993	0.536576	14369.8	0.111157	-0.843421		Val-GAC	26639.7	27861.8	0.956136	1.04588	-0.0647587	0.630308	0.896852	27250.7	0.134551	-0.481294		Glu-UUC	116.026	143.135	0.810605	1.23365	-0.297002	0.508158	0.707792	129.58	0.448842	-0.661708
Pro-GGG	4225.24	4482.8	0.942545	1.06096	-0.0847528	0.553937	0.742758	4354.02	0.143195	-0.591872		Phe-GAA	45.1338	55.4089	0.814558	1.22766	-0.266242	0.396772	0.536576	50.2713	0.314187	-0.8474		Pro-GGG	4558.4	4922.34	0.926064	1.07984	-0.110843	0.497126	0.896852	4740.37	0.163241	-0.679019		Ser-CGA	1.57834	1.22426	1.28922	0.77566	0.581283	0.557109	0.740943	1.4013	0.990023	0.587141
Thr-CGU	324.492	350.495	0.92581	1.08013	-0.112109	0.518012	0.742758	337.494	0.173432	-0.646413		Arg-CCU	923.039	858.023	1.07577	0.929562	0.108699	0.474232	0.57797	890.531	0.151897	0.71561		Ser-UGA	10949.6	10604.4	1.03255	0.968478	0.0461871	0.753306	0.947708	10777	0.146961	0.314283		Ala-GGC	63046.4	65207.7	0.966855	1.03428	-0.0486401	0.581373	0.740943	64127	0.0882151	-0.55138
Gly-CCC	6028.54	5866.98	1.02754	0.9732	0.0392567	0.753826	0.849934	5947.76	0.125181	0.313599		Leu-UAA	1317.63	1243.79	1.05936	0.943963	0.0842498	0.471478	0.57797	1280.71	0.117001	0.720076		Arg-UCU	1443.78	1470.48	0.981847	1.01849	-0.0276671	0.741513	0.947708	1457.13	0.0838778	-0.32985		Arg-ACG	65746.4	69204.2	0.950035	1.05259	-0.073956	0.588955	0.740943	67475.3	0.136866	-0.540351
Ile-GAU	42346	41466.4	1.02121	0.979228	0.0303499	0.784554	0.849934	41906.2	0.111014	0.273389		Ser-UGA	10452.1	11148.7	0.937518	1.06665	-0.0930619	0.447821	0.57797	10800.4	0.122603	-0.759053		Ser-CGA	1.6031	1.24015	1.29266	0.773599	0.393183	0.91881	0.997672	1.42162	3.8573	0.101932		Arg-CCU	946.691	889.838	1.06389	0.939945	0.0901525	0.707221	0.766156	918.265	0.240028	0.375591
Val-UAC	51926.2	51029.7	1.01757	0.982735	0.0251346	0.707255	0.849934	51478	0.0669283	0.375545		Gly-CCC	6222.04	5968.18	1.04254	0.9592	0.0606649	0.498571	0.58922	6095.11	0.0896427	0.67674		Thr-GGU	2462.39	2418.05	1.01834	0.981995	0.0267769	0.931356	0.997672	2440.22	0.310856	0.0861392		Leu-UAA	1354.33	1281.84	1.05655	0.946479	0.0793432	0.688023	0.766156	1318.08	0.197598	0.40154
Arg-ACG	61972.5	63331.6	0.978539	1.02193	-0.0314278	0.734091	0.849934	62652	0.0925195	-0.339689		Tyr-GUA	12720.5	13226.2	0.96176	1.03976	-0.0563144	0.595103	0.682618	12973.4	0.105963	-0.531456		Gly-CCC	6506.07	6428.19	1.01212	0.98803	0.0178765	0.857575	0.997672	6467.13	0.0996114	0.179462		Leu-CAA	20646	19790.9	1.04321	0.958582	0.0609509	0.67283	0.766156	20218.4	0.144342	0.422267
Pro-UGG	2329.01	2417.86	0.96325	1.03815	-0.0531337	0.702588	0.849934	2373.43	0.139155	-0.38183		Thr-CGU	335.299	317.733	1.05529	0.947611	0.0787725	0.680145	0.757876	326.516	0.191072	0.412265		Asn-GUU	18697	18563.3	1.0072	0.992847	0.0103841	0.950287	0.997672	18630.1	0.166554	0.0623468		Ser-GCU	11176.2	11650.2	0.959313	1.04241	-0.0598872	0.680306	0.766156	11413.2	0.145341	-0.412046
Phe-GAA	43.545	46.4537	0.937385	1.0668	-0.103539	0.770032	0.849934	44.9994	0.354181	-0.292333		Ser-GGA	6986.98	7137.58	0.9789	1.02156	-0.0304433	0.734413	0.76903	7062.28	0.0897342	-0.339261		His-GUG	1068.25	1067.54	1.00066	0.999341	0.000466261	0.997672	0.997672	1067.9	0.15977	0.00291833		Thr-CGU	344.196	370.638	0.928657	1.07682	-0.106535	0.677725	0.766156	357.417	0.256358	-0.41557
Ile2-CAU	26.2368	25.1184	1.04453	0.957371	0.0921376	0.806396	0.849985	25.6776	0.375952	0.245078		Pro-UGG	2405.31	2468.86	0.974261	1.02642	-0.0356387	0.740702	0.76903	2437.08	0.107695	-0.330923		Leu-UAA	1377.75	1380.96	0.997674	1.00233	-0.00239407	0.978807	0.997672	1379.35	0.0901218	-0.0265648		Ile-GAU	44937.8	43832.8	1.02521	0.975412	0.0358331	0.746808	0.787176	44385.3	0.11099	0.322851
Arg-CCU	892.713	871.638	1.02418	0.976392	0.0343866	0.834766	0.856733	882.176	0.16485	0.208593		Ile2-CAU	27.1371	29.198	0.929415	1.07595	-0.110459	0.749312	0.76903	28.1675	0.345672	-0.319547		Leu-CAG	51937.5	52219.6	0.994597	1.00543	-0.00790967	0.941748	0.997672	52078.5	0.108243	-0.0730735		Arg-CCG	6045.69	5860.23	1.03165	0.969324	0.0450171	0.796121	0.817071	5952.96	0.174234	0.258371
Tyr-GUA	12322.5	12207.3	1.00944	0.990648	0.0136851	0.918606	0.918606	12264.9	0.133919	0.10219		Ala-GGC	61352.5	60705.6	1.01066	0.989456	0.0152362	0.805773	0.805773	61029.1	0.0619652	0.245883		Cys-GCA	14565.2	14732.4	0.98865	1.01148	-0.0166122	0.904963	0.997672	14648.8	0.139138	-0.119394		Val-UAC	55086.7	55080.7	1.00011	0.99989	0.000153654	0.998724	0.998724	55083.7	0.0961012	0.00159887
Comparisons 9-12 are M2-Lop (strain 1) versus the other 4 Day13 isolates from mutant lineages (M1-L, M2-L, M3-L, M4-L; strain 2)
9: M2-Lop (strain 1) versus M1-L (strain 2)												10: M2-Lop (strain 1) versus M2-L (strain 2)												11: M2-Lop (strain 1) versus M3-L (strain 2)												12: M2-Lop (strain 1) versus M4-L (strain 2)
Result: 1 tRNA higher in M2-Lop (Asn-GUU)												Result: 3 tRNAs higher in M2-Lop (Gln-UUG, Asn-GUU, Trp-CCA); 2 tRNAs higher in M2-L (fMet-CAU, Thr-UGU)												Result: 1 tRNA higher in M2-Lop (Ile-GAU); 1 tRNA higher in M3-L (His-GUG)												Result: no signficant difference in tRNA expression detected
contig	baseMean_strain1	baseMean_strain2	Fold.change1 (strain1/strain2)	Fold.change2 (strain2/strain1)	log2FoldChange	pvalue	padj	baseMean	lfcSE	stat	notes	contig	baseMean_strain1	baseMean_strain2	Fold.change1 (strain1/strain2)	Fold.change2 (strain2/strain1)	log2FoldChange	pvalue	padj	baseMean	lfcSE	stat	notes	contig	baseMean_strain2	baseMean_strain1	Fold.change1 (strain2/strain1)	Fold.change2 (strain1/strain2)	log2FoldChange	pvalue	padj	baseMean	lfcSE	stat	notes	contig	baseMean_strain1	baseMean_strain2	Fold.change1 (strain1/strain2)	Fold.change2 (strain2/strain1)	log2FoldChange	pvalue	padj	baseMean	lfcSE	stat	notes
Asn-GUU	24196.4	17276	1.40058	0.713989	0.486014	0.00017616	0.00687025	20736.2	0.129571	3.75096	higher expression in M2-Lop (strain 1) than M1-L (strain 2)	Gln-UUG	1574.66	1163.53	1.35334	0.738912	0.434198	0.00104405	0.00914769	1369.1	0.132443	3.27838	higher expression in M2-Lop than M2-L	Ile-GAU	53258.2	42526.4	1.25236	0.798494	0.324485	3.05673e-25	1.19212e-23	47892.3	0.0312605	10.38	higher expression in M2-Lop than M3-L	Arg-ACG	60412.5	75990.1	0.795005	1.25785	-0.330971	0.0096915	0.377969	68201.3	0.127954	-2.58665
Gln-UUG	1649.23	1126.33	1.46425	0.682943	0.546992	0.000890182	0.0173585	1387.78	0.164602	3.32312		Asn-GUU	23116.6	17910.2	1.29069	0.774777	0.367972	9.85773e-05	0.00185563	20513.4	0.0944956	3.89407	higher expression in M2-Lop than M2-L	His-GUG	793.251	1151.28	0.689017	1.45134	-0.538296	5.31104e-05	0.00103565	972.266	0.133192	-4.0415	higher expression in M3-L than M2-Lop	Ser-GGA	7919.71	6588.5	1.20205	0.831913	0.265657	0.0474091	0.609097	7254.1	0.133992	1.98263
Glu-UUC	147.512	56.8734	2.59369	0.385551	1.37172	0.00947077	0.0826809	102.193	0.528686	2.59458		Trp-CCA	44006.7	37118.8	1.18557	0.84348	0.245783	0.000142741	0.00185563	40562.7	0.0646224	3.80337	higher expression in M2-Lop than M2-L	Gln-UUG	1792.37	1463.39	1.2248	0.816459	0.290641	0.00246091	0.0239939	1627.88	0.095981	3.02811		Val-UAC	53479.7	60519.9	0.883671	1.13164	-0.178398	0.0624715	0.609097	56999.8	0.095762	-1.86293
Ala-GGC	63567.3	71732	0.886177	1.12844	-0.1743	0.0103377	0.0826809	67649.7	0.0679709	-2.56432		fMet-CAU	4662.26	8078.79	0.577099	1.7328	-0.793104	0.00117278	0.00914769	6370.53	0.244376	-3.24542	higher expression in M2-L than M2-Lop	Arg-ACG	62064.1	80495.8	0.771023	1.29698	-0.375175	0.00194393	0.0239939	71279.9	0.121076	-3.09867		Gly-GCC	139294	161016	0.865096	1.15594	-0.209063	0.0594747	0.609097	150155	0.110928	-1.88467
fMet-CAU	4882.45	6587.57	0.741162	1.34923	-0.432499	0.0106001	0.0826809	5735.01	0.169235	-2.55561		Thr-UGU	9982.47	15083.1	0.66183	1.51096	-0.595719	6.00749e-08	2.34292e-06	12532.8	0.10994	-5.41858	higher expression in M2-L than M2-Lop	Thr-UGU	11362.5	15965.5	0.711691	1.4051	-0.490701	0.00529613	0.029507	13664	0.175976	-2.78845		Ser-UGA	12377.4	10651.4	1.16204	0.860555	0.216641	0.110948	0.721164	11514.4	0.135915	1.59395
Arg-CCG	5222.18	6532.5	0.799416	1.25091	-0.323808	0.0132766	0.0862978	5877.34	0.130765	-2.47626		His-GUG	696.744	1025.29	0.679558	1.47155	-0.557442	0.00188096	0.0122262	861.017	0.179333	-3.10841		Arg-CCG	5675.43	7206.73	0.787518	1.26981	-0.344673	0.00459093	0.029507	6441.08	0.121603	-2.83442		Asn-GUU	25647.7	22168.2	1.15696	0.864337	0.210453	0.0950576	0.721164	23907.9	0.126072	1.6693
Arg-ACG	57110	68459.8	0.834213	1.19873	-0.261607	0.0249549	0.139034	62784.9	0.11668	-2.2421		Arg-ACG	54519.1	64042.3	0.851299	1.17468	-0.232277	0.00750713	0.0418255	59280.7	0.0868823	-2.67347		Val-UAC	54926.2	64668.6	0.849349	1.17737	-0.235562	0.00512896	0.029507	59797.4	0.0841646	-2.79882		Ile2-CAU	32.3956	24.4208	1.32656	0.753829	0.427618	0.267661	0.765474	28.4082	0.385776	1.10846
His-GUG	729.962	914.356	0.798334	1.25261	-0.32886	0.0502569	0.245002	822.159	0.167977	-1.95777		Arg-CCG	4986.23	5893.05	0.84612	1.18187	-0.241481	0.0255647	0.124628	5439.64	0.108154	-2.23276		Asn-GUU	26299.6	19939.7	1.31896	0.758176	0.399357	0.00864748	0.037846	23119.7	0.152096	2.62568		Tyr-GUA	14682.8	12880.8	1.1399	0.877272	0.18883	0.205569	0.765474	13781.8	0.149173	1.26584
Thr-GGU	1611.1	1956.95	0.823269	1.21467	-0.28269	0.0702873	0.304578	1784.02	0.156177	-1.81005		Val-GAC	29075	25496.8	1.14034	0.876932	0.189607	0.0287647	0.124647	27285.9	0.0867091	2.1867		Arg-UCU	1796.17	1583.95	1.13398	0.881848	0.180305	0.00873369	0.037846	1690.06	0.0687582	2.62231		Met-CAU	3876.94	3493.71	1.10969	0.901152	0.150124	0.441005	0.765474	3685.33	0.194841	0.770497
Met-CAU	3658.8	3224.43	1.13471	0.881281	0.180566	0.126686	0.432284	3441.61	0.118226	1.5273		Pro-GGG	4965.8	4364.35	1.13781	0.878881	0.186117	0.0437711	0.142256	4665.08	0.0923071	2.01628		Leu-CAA	24641	20600.8	1.19612	0.836037	0.258372	0.0160865	0.0627372	22620.9	0.107344	2.40695		Leu-CAA	24037.3	21738	1.10578	0.904343	0.145129	0.223633	0.765474	22887.6	0.119259	1.21692
Trp-CCA	46075.5	42424.2	1.08607	0.920754	0.119295	0.144095	0.432284	44249.9	0.0816694	1.46071		Val-UAC	48252.8	53632.9	0.899687	1.1115	-0.152494	0.0435929	0.142256	50942.8	0.0755675	-2.01798		Thr-GGU	1750.93	2615.8	0.669369	1.49394	-0.57865	0.021413	0.0759186	2183.36	0.251519	-2.30062		Ile-GAU	51910.3	48074.2	1.07979	0.926102	0.110759	0.211394	0.765474	49992.3	0.0886253	1.24974
Ala-UGC	113091	120857	0.935743	1.06867	-0.0957643	0.136672	0.432284	116974	0.0643448	-1.4883		Leu-GAG	1810.42	2167.03	0.835438	1.19698	-0.259259	0.0372029	0.142256	1988.72	0.124433	-2.08353		Glu-UUC	160.277	89.0061	1.80074	0.555326	0.842042	0.0303512	0.0949207	124.642	0.388848	2.16548		Lys-UUU	86907.3	92216.9	0.942423	1.06109	-0.0855096	0.332298	0.765474	89562.1	0.0882	-0.969497
Thr-UGU	10455.1	12350.3	0.846543	1.18127	-0.240769	0.129063	0.432284	11402.7	0.158629	-1.51781		Arg-UCU	1578.34	1380.65	1.14319	0.874746	0.193008	0.0856965	0.222811	1479.5	0.112308	1.71855		Leu-GAG	2060.09	2337.57	0.881293	1.1347	-0.182885	0.0316402	0.0949207	2198.83	0.0851052	-2.14893		Ala-GGC	67310.7	71636.3	0.939618	1.06426	-0.0898154	0.284878	0.765474	69473.5	0.0839847	-1.06943
Val-UAC	50541.4	55099.8	0.91727	1.09019	-0.124585	0.166837	0.46476	52820.6	0.0901198	-1.38244		Leu-UAG	6331.28	6990.88	0.905648	1.10418	-0.143007	0.0825845	0.222811	6661.08	0.082383	-1.73588		Trp-CCA	50077.4	43409.7	1.1536	0.866852	0.206122	0.0428284	0.107808	46743.5	0.10177	2.02538		Ala-UGC	119722	127532	0.938757	1.06524	-0.0911508	0.390157	0.765474	123627	0.106072	-0.859332
Ser-GGA	7470.3	6960.66	1.07322	0.931778	0.102061	0.219233	0.51307	7215.48	0.0830732	1.22857		Thr-GGU	1538.41	2372.44	0.648448	1.54214	-0.625106	0.0827385	0.222811	1955.43	0.360289	-1.73501		Arg-CCU	976.599	1143.47	0.854063	1.17087	-0.228338	0.0442288	0.107808	1060.04	0.113493	-2.01192		Val-GAC	32239.1	34652.6	0.93035	1.07486	-0.104036	0.407847	0.765474	33445.8	0.125695	-0.827688
Gly-GCC	131547	137272	0.958297	1.04352	-0.0614549	0.223646	0.51307	134410	0.0505016	-1.21689		Ser-CGA	0.274569	1.5547	0.176605	5.66234	-2.3799	0.0926677	0.225877	0.914637	1.41535	-1.68149		Thr-CGU	361.735	442.506	0.81747	1.22329	-0.291631	0.0420443	0.107808	402.121	0.143443	-2.03308		Asp-GUC	95516	104425	0.914682	1.09328	-0.128694	0.246591	0.765474	99970.6	0.111071	-1.15867
Ser-UGA	11663.3	12978.4	0.898672	1.11275	-0.153833	0.211418	0.51307	12320.9	0.123098	-1.24968		Ile-GAU	46805.2	43703.8	1.07096	0.93374	0.0990818	0.161095	0.361217	45254.5	0.0707021	1.4014		fMet-CAU	5306.25	7912.4	0.670625	1.49115	-0.576298	0.0654695	0.150195	6609.32	0.312859	-1.84204		Pro-GGG	5508.38	6129.74	0.898633	1.1128	-0.153953	0.367733	0.765474	5819.06	0.17092	-0.900729
Ile-GAU	49000.3	44690.6	1.09643	0.912048	0.132939	0.238912	0.515962	46845.5	0.112879	1.17771		Ala-UGC	107988	101571	1.06319	0.940569	0.0884584	0.166715	0.361217	104779	0.0639689	1.38284		Ser-GGA	8119.88	6892.18	1.17813	0.848803	0.236848	0.0748767	0.162233	7506.03	0.13297	1.78122		Pro-UGG	2738.77	3054.72	0.896571	1.11536	-0.157667	0.393145	0.765474	2896.74	0.184638	-0.853929
Val-GAC	30447.5	27947.7	1.08944	0.9179	0.123787	0.267716	0.515962	29197.6	0.111687	1.10834		Ser-GCU	11760.1	10862.8	1.0826	0.9237	0.114219	0.239626	0.445019	11311.5	0.0971317	1.17592		Tyr-GUA	15042	13551.7	1.10997	0.900925	0.150461	0.189618	0.389217	14296.8	0.114706	1.31171		Thr-CGU	352.043	407.99	0.862871	1.15892	-0.212657	0.397977	0.765474	380.016	0.251594	-0.845239
Arg-UCU	1652.62	1529.06	1.08081	0.925232	0.112129	0.277826	0.515962	1590.84	0.103324	1.08522		Lys-UUU	78334.9	74279.9	1.05459	0.948235	0.0767519	0.235447	0.445019	76307.4	0.0646906	1.18644		Ser-UGA	12679	11406.9	1.11151	0.899676	0.152519	0.209304	0.408143	12043	0.121483	1.25548		Thr-GGU	1705.51	1987.08	0.858302	1.16509	-0.22036	0.469039	0.765474	1846.3	0.304346	-0.724044
Thr-CGU	332.876	378.73	0.878926	1.13775	-0.189164	0.275523	0.515962	355.803	0.173476	-1.09043		Gly-GCC	125629	119803	1.04864	0.953619	0.0685696	0.234884	0.445019	122716	0.0577248	1.18787		Ile2-CAU	33.2219	26.6063	1.24865	0.800867	0.362895	0.284758	0.523503	29.9141	0.339253	1.06969		Arg-CCG	5526.87	6446.26	0.857375	1.16635	-0.222041	0.202248	0.765474	5986.56	0.174126	-1.27517
Pro-GGG	5198.5	4831.76	1.0759	0.929452	0.106051	0.439484	0.779084	5015.13	0.137182	0.773066		Glu-UUC	140.727	113.325	1.24179	0.805287	0.30608	0.264865	0.451246	127.026	0.274519	1.11497		Pro-UGG	2808.82	2444.72	1.14893	0.870373	0.200567	0.360603	0.523503	2626.77	0.219387	0.914216		His-GUG	771.92	943.669	0.817998	1.2225	-0.290005	0.252693	0.765474	857.794	0.253538	-1.14383
Cys-GCA	15524.4	16157	0.960847	1.04075	-0.0574158	0.546488	0.926653	15840.7	0.0952119	-0.603032		Gly-UCC	16047.3	17036	0.94196	1.06162	-0.0861938	0.26612	0.451246	16541.7	0.0775094	-1.11204		Val-GAC	33090	29944.4	1.10505	0.904939	0.144122	0.317811	0.523503	31517.2	0.144271	0.998966		fMet-CAU	5168.89	6568.31	0.786944	1.27074	-0.345652	0.471061	0.765474	5868.6	0.47957	-0.720754
Ile2-CAU	30.5679	27.1056	1.12774	0.886733	0.188225	0.728233	0.949444	28.8368	0.541691	0.347477		Leu-CAA	21661	20054.7	1.0801	0.925843	0.111352	0.280084	0.455136	20857.9	0.103092	1.08013		Cys-GCA	16875.2	15846.4	1.06492	0.939034	0.090684	0.337142	0.523503	16360.8	0.0944794	0.959828		Ser-CGA	0.301655	1.34636	0.224053	4.46322	-1.8611	0.451184	0.765474	0.824005	2.47013	-0.753442
Phe-GAA	57.9914	50.2797	1.15338	0.86702	0.180876	0.668959	0.949444	54.1356	0.423025	0.427576		Leu-CAG	47368.8	49641.4	0.954221	1.04798	-0.0675347	0.312373	0.487301	48505.1	0.0668491	-1.01026		Ala-UGC	122906	117510	1.04592	0.956099	0.0647864	0.363009	0.523503	120208	0.0712215	0.909647		Arg-UCU	1750.07	1930.58	0.906496	1.10315	-0.141595	0.495129	0.7724	1840.33	0.207564	-0.682175
Tyr-GUA	13837	13158.4	1.05158	0.950954	0.0726876	0.596684	0.949444	13497.7	0.13736	0.529175		Asp-GUC	86188.5	81319.8	1.05987	0.943511	0.0839078	0.325407	0.48811	83754.1	0.0853234	0.983408		Lys-UUU	89122.8	86194.6	1.03397	0.967144	0.0482507	0.375848	0.523503	87658.7	0.0544854	0.885572		Thr-UGU	11063.9	12864.2	0.860052	1.16272	-0.21752	0.558185	0.837277	11964	0.371487	-0.58554
Leu-UAG	6627.15	6522.22	1.01609	0.984167	0.0226169	0.75629	0.949444	6574.68	0.0728738	0.310357		Met-CAU	3495.19	3774.01	0.926122	1.07977	-0.111385	0.362737	0.523953	3634.6	0.122379	-0.910163		Leu-UAA	1415.38	1488.6	0.95081	1.05174	-0.0730048	0.371884	0.523503	1451.99	0.0817568	-0.892951		Leu-GAG	2007.75	1845.96	1.08764	0.919419	0.121083	0.624318	0.901793	1926.86	0.24724	0.48974
Leu-CAG	49596.2	49183.7	1.00839	0.991682	0.0120764	0.885593	0.949444	49390	0.083932	0.143883		Phe-GAA	55.4089	45.1338	1.22766	0.814558	0.266242	0.396772	0.536576	50.2713	0.314187	0.8474		Asp-GUC	98105.5	104719	0.936843	1.06741	-0.0941936	0.349241	0.523503	101412	0.100627	-0.936062		Gly-CCC	6621.48	6376.68	1.03839	0.963029	0.0542865	0.72223	0.989574	6499.08	0.152713	0.35548
Gly-UCC	16800.4	16713.2	1.00522	0.994806	0.00743998	0.925099	0.949444	16756.8	0.0791378	0.094013		Cys-GCA	14835.8	13903.7	1.06705	0.937168	0.0937519	0.398993	0.536576	14369.8	0.111157	0.843421		Ser-CGA	0.314154	1.35879	0.231202	4.32522	-1.81087	0.396428	0.533128	0.836471	2.13542	-0.848018		Ser-GCU	13042.3	12767.4	1.02153	0.978928	0.0306343	0.792018	0.989574	12904.8	0.116175	0.26369
Asp-GUC	90269.1	90914.5	0.992901	1.00715	-0.0103558	0.896196	0.949444	90591.8	0.0793739	-0.130469		Ser-UGA	11148.7	10452.1	1.06665	0.937518	0.0930619	0.447821	0.57797	10800.4	0.122603	0.759053		Leu-CAG	53904.5	56170.1	0.959666	1.04203	-0.0594796	0.504927	0.656406	55037.3	0.0892073	-0.666757		Phe-GAA	61.4615	60.6652	1.01313	0.987043	0.00792349	0.98089	0.989574	61.0633	0.33079	0.0239532
Leu-UAA	1302.25	1310.51	0.993696	1.00634	-0.0105785	0.913688	0.949444	1306.38	0.0975989	-0.108388		Leu-UAA	1243.79	1317.63	0.943963	1.05936	-0.0842498	0.471478	0.57797	1280.71	0.117001	-0.720076		Pro-GGG	5650.18	5287.67	1.06856	0.93584	0.0955742	0.528476	0.664856	5468.92	0.151625	0.630335		Glu-UUC	155.825	155.488	1.00217	0.997838	0.0057725	0.989574	0.989574	155.657	0.441752	0.0130673
Pro-UGG	2584.1	2607.12	0.99117	1.00891	-0.0133162	0.91977	0.949444	2595.61	0.132206	-0.100723		Arg-CCU	858.023	923.039	0.929562	1.07577	-0.108699	0.474232	0.57797	890.531	0.151897	-0.71561		Gly-GCC	142971	144953	0.986325	1.01386	-0.0199089	0.677132	0.77671	143962	0.0478142	-0.41638		Leu-UAG	7023.53	7057.19	0.995231	1.00479	-0.0068785	0.956317	0.989574	7040.36	0.125575	-0.054776
Leu-GAG	1895.4	1915.59	0.989462	1.01065	-0.0181092	0.839734	0.949444	1905.49	0.0895456	-0.202234		Gly-CCC	5968.18	6222.04	0.9592	1.04254	-0.0606649	0.498571	0.58922	6095.11	0.0896427	-0.67674		Leu-UAG	7203.28	7417.19	0.97116	1.0297	-0.0419896	0.650651	0.77671	7310.24	0.0927212	-0.452858		Trp-CCA	48803.2	49040	0.99517	1.00485	-0.00692397	0.948836	0.989574	48921.6	0.107904	-0.0641681
Leu-CAA	22669.6	22963.2	0.987214	1.01295	-0.0182245	0.85115	0.949444	22816.4	0.0971189	-0.187652		Tyr-GUA	13226.2	12720.5	1.03976	0.96176	0.0563144	0.595103	0.682618	12973.4	0.105963	0.531456		Phe-GAA	63.0372	68.0948	0.925728	1.08023	-0.116403	0.670119	0.77671	65.566	0.273256	-0.425985		Leu-CAG	52525.8	52841.4	0.994028	1.00601	-0.00866142	0.903209	0.989574	52683.6	0.0712238	-0.121608
Gly-CCC	6246.57	6339.68	0.985312	1.01491	-0.0216696	0.851787	0.949444	6293.12	0.11598	-0.186839		Thr-CGU	317.733	335.299	0.947611	1.05529	-0.0787725	0.680145	0.757876	326.516	0.191072	-0.412265		Met-CAU	3976.81	3853.01	1.03213	0.968871	0.0459664	0.750297	0.790854	3914.91	0.144436	0.318248		Gly-UCC	17796.9	18030.3	0.987058	1.01311	-0.0187759	0.824264	0.989574	17913.6	0.0845519	-0.222064
Ser-GCU	12311.3	12663.8	0.972169	1.02863	-0.0407857	0.632968	0.949444	12487.5	0.0854057	-0.477553		Ile2-CAU	29.198	27.1371	1.07595	0.929415	0.110459	0.749312	0.76903	28.1675	0.345672	0.319547		Ala-GGC	69086.3	70307.7	0.982627	1.01768	-0.0252048	0.715335	0.790854	69697	0.0691109	-0.3647		Cys-GCA	16465.3	16796.6	0.980271	1.02013	-0.0287328	0.807027	0.989574	16631	0.117631	-0.244263
Arg-CCU	898.595	942.412	0.953505	1.04876	-0.0727383	0.621344	0.949444	920.503	0.147259	-0.493947		Pro-UGG	2468.86	2405.31	1.02642	0.974261	0.0356387	0.740702	0.76903	2437.08	0.107695	0.330923		Gly-CCC	6789.76	6924.8	0.980498	1.01989	-0.0282331	0.736206	0.790854	6857.28	0.0838069	-0.336882		Leu-UAA	1379.27	1410.2	0.978067	1.02242	-0.0321454	0.868097	0.989574	1394.74	0.193558	-0.166076
Ser-CGA	0.289622	0.565164	0.512457	1.95138	-0.819938	0.761572	0.949444	0.427393	2.70234	-0.303417		Ser-GGA	7137.58	6986.98	1.02156	0.9789	0.0304433	0.734413	0.76903	7062.28	0.0897342	0.339261		Gly-UCC	18260.2	18166.2	1.00517	0.994854	0.00718416	0.897191	0.916585	18213.2	0.0556003	0.129211		Arg-CCU	951.065	979.366	0.971103	1.02976	-0.0427402	0.849064	0.989574	965.215	0.224579	-0.190312
Lys-UUU	81995.6	81920.7	1.00091	0.999087	0.00144959	0.978845	0.978845	81958.2	0.0546673	0.0265166		Ala-GGC	60705.6	61352.5	0.989456	1.01066	-0.0152362	0.805773	0.805773	61029.1	0.0619652	-0.245883		Ser-GCU	13381.4	13457.6	0.994338	1.00569	-0.00854271	0.916585	0.916585	13419.5	0.0815639	-0.104736		Gln-UUG	1745.23	1840.04	0.948475	1.05432	-0.0762606	0.749009	0.989574	1792.64	0.238355	-0.319946
Comparisons 13-16 are M3-L (strain 1) versus the other 4 Day13 isolates from mutant lineages (M1-L, M2-L, M2-Lop, M4-L; strain 2)
13: M3-L (strain 1) versus M1-L (strain 2)												14: M3-L (strain 1) versus M2-L (strain 2)												15: M3-L (strain 1) versus M2-Lop (strain 2)												16: M3-L (strain 1) versus M4-L (strain 2)
Result: no signficant difference in tRNA expression detected												Result: no signficant difference in tRNA expression detected												Result: 1 tRNA expression is higher in M3-L (His-GUG); 1 in M2-Lop (Ile-GAU)												Result: no signficant difference in tRNA expression detected
contig	baseMean_strain1	baseMean_strain2	Fold.change1 (strain1/strain2)	Fold.change2 (strain2/strain1)	log2FoldChange	pvalue	padj	baseMean	lfcSE	stat	notes	contig	baseMean_strain1	baseMean_strain2	Fold.change1 (strain1/strain2)	Fold.change2 (strain2/strain1)	log2FoldChange	pvalue	padj	baseMean	lfcSE	stat	notes	contig	baseMean_strain1	baseMean_strain2	Fold.change1 (strain1/strain2)	Fold.change2 (strain2/strain1)	log2FoldChange	pvalue	padj	baseMean	lfcSE	stat	notes	contig	baseMean_strain1	baseMean_strain2	Fold.change1 (strain1/strain2)	Fold.change2 (strain2/strain1)	log2FoldChange	pvalue	padj	baseMean	lfcSE	stat	notes
Ala-UGC	115087	127422	0.903198	1.10718	-0.146826	0.00702	0.27378	121254	0.0544629	-2.69589		Ile-GAU	39492.2	45707.5	0.86402	1.15738	-0.210679	0.00924166	0.360425	42599.9	0.0809376	-2.60298		His-GUG	1151.28	793.251	1.45134	0.689017	0.538296	5.31104e-05	0.00103565	972.266	0.133192	4.0415	higher expression in strain 1 than strain 2	Leu-GAG	2408.94	1935.38	1.24468	0.803417	0.315615	0.217408	0.792951	2172.16	0.25588	1.23345
Ser-UGA	11171.9	13689.7	0.816077	1.22537	-0.292914	0.0241081	0.470108	12430.8	0.129872	-2.2554		Thr-CGU	410.536	350.035	1.17284	0.852629	0.229002	0.0443184	0.576139	380.285	0.113871	2.01107		Ile-GAU	42526.4	53258.2	0.798494	1.25236	-0.324485	3.05673e-25	1.19212e-23	47892.3	0.0312605	-10.38	higher expression in strain 2 than strain 1	Lys-UUU	88847.7	97191.7	0.914149	1.09391	-0.129485	0.210774	0.792951	93019.7	0.103468	-1.25144
Ala-GGC	68814	75606.4	0.910161	1.09871	-0.135827	0.0588399	0.573749	72210.2	0.0718896	-1.88939		Val-UAC	60023.1	56025.3	1.07136	0.933396	0.0994656	0.0411083	0.576139	58024.2	0.0486995	2.04244		Arg-ACG	80495.8	62064.1	1.29698	0.771023	0.375175	0.00194393	0.0239939	71279.9	0.121076	3.09867		Ala-UGC	121124	134517	0.900439	1.11057	-0.151287	0.194761	0.792951	127820	0.116678	-1.29662
Leu-CAA	20191.5	24222.9	0.833572	1.19966	-0.262447	0.0588461	0.573749	22207.2	0.138909	-1.88934		Asp-GUC	97204.3	85067.8	1.14267	0.875144	0.192494	0.0698479	0.681017	91136	0.10618	1.8129		Gln-UUG	1463.39	1792.37	0.816459	1.2248	-0.290641	0.00246091	0.0239939	1627.88	0.095981	-3.02811		Gly-GCC	149410	169880	0.8795	1.13701	-0.185235	0.142528	0.792951	159645	0.126316	-1.46644
Thr-GGU	2553.38	2060.07	1.23946	0.8068	0.308232	0.178614	0.641174	2306.72	0.229162	1.34504		Gln-UUG	1358.15	1214.04	1.11871	0.89389	0.159917	0.128814	0.755542	1286.09	0.105292	1.5188		Thr-UGU	15965.5	11362.5	1.4051	0.711691	0.490701	0.00529613	0.029507	13664	0.175976	2.78845		Trp-CCA	44762.2	51764.8	0.864723	1.15644	-0.209643	0.135087	0.792951	48263.5	0.140292	-1.49434
Gln-UUG	1432.52	1187.05	1.20678	0.828648	0.268892	0.107953	0.641174	1309.78	0.167278	1.60746		Arg-ACG	74608	66852.8	1.116	0.896054	0.158367	0.127482	0.755542	70730.4	0.103908	1.52411		Arg-CCG	7206.73	5675.43	1.26981	0.787518	0.344673	0.00459093	0.029507	6441.08	0.121603	2.83442		Ile-GAU	43825.8	50690.6	0.864574	1.15664	-0.209927	0.0557882	0.792951	47258.2	0.109755	-1.91269
Thr-UGU	15600.6	12997.9	1.20024	0.833169	0.263041	0.152649	0.641174	14299.3	0.183915	1.43024		Gly-GCC	134648	125310	1.07452	0.930652	0.10375	0.154983	0.755542	129979	0.0729528	1.42215		Val-UAC	64668.6	54926.2	1.17737	0.849349	0.235562	0.00512896	0.029507	59797.4	0.0841646	2.79882		Val-GAC	30884.5	36585.1	0.844184	1.18458	-0.244309	0.122951	0.792951	33734.8	0.158385	-1.54251
His-GUG	1126.45	962.59	1.17023	0.854533	0.223053	0.144041	0.641174	1044.52	0.152681	1.46091		Ser-GGA	6388.83	7304.84	0.874603	1.14338	-0.193734	0.146481	0.755542	6846.83	0.133419	-1.45208		Arg-UCU	1583.95	1796.17	0.881848	1.13398	-0.180305	0.00873369	0.037846	1690.06	0.0687582	-2.62231		Pro-GGG	5454.02	6472.14	0.842693	1.18667	-0.2467	0.223653	0.792951	5963.08	0.202733	-1.21687
Leu-GAG	2287.67	2018.72	1.13323	0.882436	0.179664	0.1964	0.641174	2153.2	0.139072	1.29187		Phe-GAA	63.0236	46.906	1.34361	0.744261	0.399248	0.192791	0.835429	54.9648	0.306556	1.30237		Asn-GUU	19939.7	26299.6	0.758176	1.31896	-0.399357	0.00864748	0.037846	23119.7	0.152096	-2.62568		Arg-UCU	1632.05	2039.4	0.800259	1.2496	-0.32132	0.162403	0.792951	1835.72	0.230002	-1.39704
Val-UAC	63298.4	58073.1	1.08998	0.917449	0.124304	0.120287	0.641174	60685.7	0.0800121	1.55357		Ser-GCU	12504.6	11371.9	1.0996	0.90942	0.136999	0.254153	0.876102	11938.3	0.120141	1.14032		Leu-CAA	20600.8	24641	0.836037	1.19612	-0.258372	0.0160865	0.0627372	22620.9	0.107344	-2.40695		Pro-UGG	2516.07	3222.69	0.780735	1.28084	-0.357394	0.146545	0.792951	2869.38	0.246165	-1.45184
Asp-GUC	102534	95847.3	1.06977	0.934781	0.0973577	0.197284	0.641174	99190.9	0.0755104	1.28933		Arg-CCU	1060.23	962.666	1.10135	0.90798	0.135353	0.292545	0.876102	1011.45	0.128595	1.05255		Thr-GGU	2615.8	1750.93	1.49394	0.669369	0.57865	0.021413	0.0759186	2183.36	0.251519	2.30062		Gln-UUG	1508.25	1945.98	0.77506	1.29022	-0.367291	0.156787	0.792951	1727.12	0.259393	-1.41596
Ile-GAU	41634.5	47163.2	0.882776	1.13279	-0.179749	0.135325	0.641174	44398.8	0.12036	-1.49343		Arg-CCG	6679.91	6147.17	1.08666	0.920248	0.11969	0.353618	0.876102	6413.54	0.129032	0.927594		Leu-GAG	2337.57	2060.09	1.1347	0.881293	0.182885	0.0316402	0.0949207	2198.83	0.0851052	2.14893		Thr-GGU	2692.01	2079.34	1.29464	0.772413	0.372278	0.272389	0.807703	2385.68	0.339181	1.09758
Arg-CCU	1118.42	992.355	1.12704	0.887281	0.169402	0.256718	0.710785	1055.39	0.14936	1.13418		Gly-UCC	16880.3	17819.9	0.947274	1.05566	-0.0779584	0.387808	0.876102	17350.1	0.0902714	-0.8636		Glu-UUC	89.0061	160.277	0.555326	1.80074	-0.842042	0.0303512	0.0949207	124.642	0.388848	-2.16548		Asn-GUU	20569.3	23408.2	0.878722	1.13802	-0.186425	0.278314	0.807703	21988.8	0.17196	-1.08412
Arg-ACG	78746.4	72095.3	1.09225	0.915538	0.127231	0.240167	0.710785	75420.9	0.108321	1.17457		Tyr-GUA	12590.5	13298.8	0.946738	1.05626	-0.0786625	0.325994	0.876102	12944.6	0.0800868	-0.982215		Thr-CGU	442.506	361.735	1.22329	0.81747	0.291631	0.0420443	0.107808	402.121	0.143443	2.03308		Glu-UUC	91.9482	165.388	0.555955	1.79871	-0.844489	0.289945	0.807703	128.668	0.798011	-1.05824
Cys-GCA	15523.2	17039	0.911042	1.09764	-0.134218	0.273379	0.710785	16281.1	0.122539	-1.09531		Leu-UAG	6882.2	7304.62	0.94217	1.06138	-0.0861084	0.352876	0.876102	7093.41	0.0926868	-0.929025		Arg-CCU	1143.47	976.599	1.17087	0.854063	0.228338	0.0442288	0.107808	1060.04	0.113493	2.01192		His-GUG	1186.37	990.299	1.19799	0.83473	0.26043	0.311572	0.810087	1088.33	0.25736	1.01193
Pro-UGG	2387.84	2750.05	0.86829	1.15169	-0.204169	0.326062	0.794777	2568.95	0.207895	-0.982076		Leu-CAA	19167.4	21009.3	0.912332	1.09609	-0.132272	0.384726	0.876102	20088.3	0.152173	-0.869222		Trp-CCA	43409.7	50077.4	0.866852	1.1536	-0.206122	0.0428284	0.107808	46743.5	0.10177	-2.02538		Thr-UGU	16441.6	13482.2	1.2195	0.820005	0.286275	0.435181	0.873643	14961.9	0.366852	0.780356
Ser-CGA	1.31911	0.594249	2.2198	0.450491	0.865943	0.501336	0.811364	0.956682	1.28786	0.672388		Met-CAU	3570.19	3933.57	0.907623	1.10178	-0.140422	0.404355	0.876102	3751.88	0.168398	-0.833869		fMet-CAU	7912.4	5306.25	1.49115	0.670625	0.576298	0.0654695	0.150195	6609.32	0.312859	1.84204		fMet-CAU	8141.18	6871.23	1.18482	0.844009	0.244637	0.680457	0.873643	7506.21	0.594011	0.41184
Glu-UUC	87.5998	60.0861	1.4579	0.685916	0.543863	0.512822	0.811364	73.843	0.831023	0.65445		Glu-UUC	83.3414	117.95	0.706585	1.41526	-0.500129	0.349063	0.876102	100.645	0.534092	-0.936409		Ser-GGA	6892.18	8119.88	0.848803	1.17813	-0.236848	0.0748767	0.162233	7506.03	0.13297	-1.78122		Arg-CCU	1177.92	1028.5	1.14528	0.873147	0.195296	0.41431	0.873643	1103.21	0.239235	0.816333
Phe-GAA	66.5127	52.8957	1.25743	0.795272	0.300529	0.39559	0.811364	59.7042	0.353762	0.849523		Pro-GGG	4922.34	4558.4	1.07984	0.926064	0.110843	0.497126	0.896852	4740.37	0.163241	0.679019		Tyr-GUA	13551.7	15042	0.900925	1.10997	-0.150461	0.189618	0.389217	14296.8	0.114706	-1.31171		Arg-CCG	7425.18	6772.06	1.09644	0.91204	0.132762	0.458457	0.873643	7098.62	0.179071	0.74139
Met-CAU	3766.65	3396.42	1.109	0.90171	0.148263	0.389154	0.811364	3581.53	0.172168	0.861153		Val-GAC	27861.8	26639.7	1.04588	0.956136	0.0647587	0.630308	0.896852	27250.7	0.134551	0.481294		Ser-UGA	11406.9	12679	0.899676	1.11151	-0.152519	0.209304	0.408143	12043	0.121483	-1.25548		Phe-GAA	70.094	63.6866	1.10061	0.908589	0.12911	0.678643	0.873643	66.8903	0.311622	0.414316
Thr-CGU	433.166	398.964	1.08573	0.921043	0.11644	0.461822	0.811364	416.065	0.158239	0.73585		Trp-CCA	40344.8	38814.3	1.03943	0.962064	0.0559003	0.607084	0.896852	39579.6	0.108705	0.51424		Asp-GUC	104719	98105.5	1.06741	0.936843	0.0941936	0.349241	0.523503	101412	0.100627	0.936062		Met-CAU	3967.9	3669.33	1.08137	0.924754	0.112616	0.595018	0.873643	3818.62	0.211851	0.531578
Asn-GUU	19557.4	18218.3	1.0735	0.931531	0.102355	0.556766	0.811364	18887.8	0.174176	0.587651		Lys-UUU	80085.1	77716.7	1.03048	0.970426	0.0433424	0.595635	0.896852	78900.9	0.081672	0.530688		Leu-UAA	1488.6	1415.38	1.05174	0.95081	0.0730048	0.371884	0.523503	1451.99	0.0817568	0.892951		Gly-CCC	7134.12	6702.05	1.06447	0.939437	0.0899696	0.563211	0.873643	6918.08	0.155636	0.578079
Leu-CAG	55040.8	51876.7	1.06099	0.942513	0.0854963	0.437176	0.811364	53458.8	0.110038	0.776971		Ala-UGC	109180	106176	1.02829	0.972487	0.0403056	0.508634	0.896852	107678	0.0609798	0.660967		Lys-UUU	86194.6	89122.8	0.967144	1.03397	-0.0482507	0.375848	0.523503	87658.7	0.0544854	-0.885572		Thr-CGU	456.128	428.546	1.06436	0.939529	0.0897642	0.704006	0.873643	442.337	0.236273	0.379918
Leu-UAG	7256.52	6875.32	1.05545	0.947468	0.0776466	0.518715	0.811364	7065.92	0.120321	0.645327		Ala-GGC	65283.9	64129.9	1.01799	0.982323	0.0257061	0.66689	0.896852	64706.9	0.0597231	0.430421		Ala-UGC	117510	122906	0.956099	1.04592	-0.0647864	0.363009	0.523503	120208	0.0712215	-0.909647		Ile2-CAU	27.3888	25.6781	1.06662	0.937541	0.0741231	0.831612	0.873643	26.5335	0.348594	0.212635
Leu-UAA	1456.68	1381.08	1.05474	0.948099	0.0765388	0.561713	0.811364	1418.88	0.131896	0.580298		Leu-GAG	2168.62	2260.79	0.959231	1.0425	-0.0595351	0.629377	0.896852	2214.71	0.123362	-0.482603		Cys-GCA	15846.4	16875.2	0.939034	1.06492	-0.090684	0.337142	0.523503	16360.8	0.0944794	-0.959828		Ser-UGA	11755.3	11208.3	1.04881	0.953463	0.0687106	0.603738	0.873643	11481.8	0.132382	0.519032
Trp-CCA	42535.1	44746.3	0.950584	1.05199	-0.0729998	0.535988	0.811364	43640.7	0.117953	-0.618891		Thr-UGU	14774.8	15731.4	0.939193	1.06474	-0.0905755	0.592901	0.896852	15253.1	0.169415	-0.534636		Val-GAC	29944.4	33090	0.904939	1.10505	-0.144122	0.317811	0.523503	31517.2	0.144271	-0.998966		Val-UAC	66642.3	63671.4	1.04666	0.95542	0.0657906	0.515994	0.873643	65156.8	0.101289	0.649533
Ser-GGA	6738.92	7335.93	0.918618	1.08859	-0.122676	0.372584	0.811364	7037.43	0.137584	-0.891643		Pro-UGG	2263.47	2512.79	0.900778	1.11015	-0.15157	0.455052	0.896852	2388.13	0.202899	-0.747019		Pro-UGG	2444.72	2808.82	0.870373	1.14893	-0.200567	0.360603	0.523503	2626.77	0.219387	-0.914216		Leu-CAG	57916.5	55642.3	1.04087	0.960734	0.0578293	0.59458	0.873643	56779.4	0.108659	0.532211
Gly-GCC	141952	144702	0.980992	1.01938	-0.0276294	0.589932	0.821691	143327	0.0512667	-0.538934		fMet-CAU	7300.49	8407.82	0.868297	1.15168	-0.203795	0.646639	0.896852	7854.16	0.444543	-0.458437		Ile2-CAU	26.6063	33.2219	0.800867	1.24865	-0.362895	0.284758	0.523503	29.9141	0.339253	-1.06969		Arg-ACG	82948.3	79937.8	1.03766	0.963706	0.0533366	0.712759	0.873643	81443	0.144876	0.368154
Lys-UUU	84419.7	86363.9	0.977488	1.02303	-0.0327816	0.632212	0.822296	85391.8	0.0684924	-0.478616		Ile2-CAU	24.7008	28.2861	0.873247	1.14515	-0.232175	0.515197	0.896852	26.4935	0.356771	-0.650768		Ser-CGA	1.35879	0.314154	4.32522	0.231202	1.81087	0.396428	0.533128	0.836471	2.13542	0.848018		Leu-UAA	1533.91	1482.28	1.03483	0.966343	0.049165	0.816551	0.873643	1508.1	0.211933	0.231983
Tyr-GUA	13269.3	13884	0.95573	1.04632	-0.0651137	0.632535	0.822296	13576.7	0.136175	-0.478162		Arg-UCU	1470.48	1443.78	1.01849	0.981847	0.0276671	0.741513	0.947708	1457.13	0.0838778	0.32985		Leu-CAG	56170.1	53904.5	1.04203	0.959666	0.0594796	0.504927	0.656406	55037.3	0.0892073	0.666757		Tyr-GUA	13965.5	13540.4	1.03139	0.969566	0.0445197	0.753646	0.873643	13752.9	0.141857	0.313835
Arg-UCU	1550.29	1612.69	0.961307	1.04025	-0.0563561	0.680103	0.855613	1581.49	0.136679	-0.412323		Ser-UGA	10604.4	10949.6	0.968478	1.03255	-0.0461871	0.753306	0.947708	10777	0.146961	-0.314283		Pro-GGG	5287.67	5650.18	0.93584	1.06856	-0.0955742	0.528476	0.664856	5468.92	0.151625	-0.630335		Ser-GCU	13866.7	13462.9	1.02999	0.970879	0.0426906	0.748523	0.873643	13664.8	0.133164	0.320588
fMet-CAU	7716.8	6932.76	1.11309	0.898398	0.154471	0.732748	0.887658	7324.78	0.452367	0.341473		Cys-GCA	14732.4	14565.2	1.01148	0.98865	0.0166122	0.904963	0.997672	14648.8	0.139138	0.119394		Phe-GAA	68.0948	63.0372	1.08023	0.925728	0.116403	0.670119	0.77671	65.566	0.273256	0.425985		Leu-UAG	7640.59	7425.73	1.02893	0.971879	0.041024	0.768171	0.873643	7533.16	0.139174	0.294769
Ile2-CAU	26.0182	28.58	0.910363	1.09846	-0.138377	0.751095	0.887658	27.2991	0.436251	-0.317195		Leu-CAG	52219.6	51937.5	1.00543	0.994597	0.00790967	0.941748	0.997672	52078.5	0.108243	0.0730735		Leu-UAG	7417.19	7203.28	1.0297	0.97116	0.0419896	0.650651	0.77671	7310.24	0.0927212	0.452858		Ser-GGA	7097.98	6931.45	1.02402	0.976539	0.0341025	0.832869	0.873643	7014.71	0.161605	0.211024
Arg-CCG	7049.22	6878.44	1.02483	0.975773	0.0348309	0.815095	0.925678	6963.83	0.14894	0.233859		Leu-UAA	1380.96	1377.75	1.00233	0.997674	0.00239407	0.978807	0.997672	1379.35	0.0901218	0.0265648		Gly-GCC	144953	142971	1.01386	0.986325	0.0199089	0.677132	0.77671	143962	0.0478142	0.41638		Gly-UCC	18725.3	18991.6	0.985977	1.01422	-0.0203185	0.851242	0.873643	18858.4	0.108346	-0.187534
Pro-GGG	5185.61	5098.09	1.01717	0.983121	0.024935	0.891685	0.925678	5141.85	0.183115	0.136172		His-GUG	1067.54	1068.25	0.999341	1.00066	-0.000466261	0.997672	0.997672	1067.9	0.15977	-0.00291833		Gly-CCC	6924.8	6789.76	1.01989	0.980498	0.0282331	0.736206	0.790854	6857.28	0.0838069	0.336882		Asp-GUC	107950	110023	0.981162	1.0192	-0.0274227	0.827104	0.873643	108986	0.125552	-0.218417
Gly-CCC	6776.56	6678.49	1.01468	0.985528	0.0207897	0.878552	0.925678	6727.53	0.136054	0.152805		Asn-GUU	18563.3	18697	0.992847	1.0072	-0.0103841	0.950287	0.997672	18630.1	0.166554	-0.0623468		Ala-GGC	70307.7	69086.3	1.01768	0.982627	0.0252048	0.715335	0.790854	69697	0.0691109	0.3647		Ala-GGC	72437.8	75427.1	0.960369	1.04127	-0.0583584	0.549137	0.873643	73932.4	0.0974177	-0.599054
Gly-UCC	17792.7	17614.8	1.0101	0.990001	0.0145514	0.901943	0.925678	17703.7	0.118104	0.123208		Gly-CCC	6428.19	6506.07	0.98803	1.01212	-0.0178765	0.857575	0.997672	6467.13	0.0996114	-0.179462		Met-CAU	3853.01	3976.81	0.968871	1.03213	-0.0459664	0.750297	0.790854	3914.91	0.144436	-0.318248		Leu-CAA	21240.2	22903.5	0.927379	1.07831	-0.108733	0.450522	0.873643	22071.8	0.144104	-0.754544
Ser-GCU	13176.2	13354.9	0.986614	1.01357	-0.0192643	0.87027	0.925678	13265.6	0.117958	-0.163315		Thr-GGU	2418.05	2462.39	0.981995	1.01834	-0.0267769	0.931356	0.997672	2440.22	0.310856	-0.0861392		Ser-GCU	13457.6	13381.4	1.00569	0.994338	0.00854271	0.916585	0.916585	13419.5	0.0815639	0.104736		Cys-GCA	16333.7	17703.5	0.922627	1.08386	-0.116141	0.36717	0.873643	17018.6	0.128789	-0.901788
Val-GAC	29359.5	29479.4	0.995933	1.00408	-0.00576644	0.968236	0.968236	29419.4	0.144809	-0.0398209		Ser-CGA	1.24015	1.6031	0.773599	1.29266	-0.393183	0.91881	0.997672	1.42162	3.8573	-0.101932		Gly-UCC	18166.2	18260.2	0.994854	1.00517	-0.00718416	0.897191	0.916585	18213.2	0.0556003	-0.129211		Ser-CGA	1.39703	1.40835	0.991965	1.0081	-0.0404602	0.980221	0.980221	1.40269	1.63202	-0.0247915
Comparisons 17-20 are M4-L (strain 1) versus the other 4 Day13 isolates from mutant lineages (M1-L, M2-L, M2-Lop, M3-L; strain 2)
17: M4-L (strain 1) versus M1-L (strain 2)												18: M4-L (strain 1) versus M2-L (strain 2)												19: M4-L (strain 1) versus M2-Lop (strain 2)												20: M4-L (strain 1) versus M3-L (strain 2)
Result: no signficant difference in tRNA expression detected												Result: no signficant difference in tRNA expression detected												Result: no signficant difference in tRNA expression detected												Result: no signficant difference in tRNA expression detected
contig	baseMean_strain1	baseMean_strain2	Fold.change1 (strain1/strain2)	Fold.change2 (strain2/strain1)	log2FoldChange	pvalue	padj	baseMean	lfcSE	stat	notes	contig	baseMean_strain1	baseMean_strain2	Fold.change1 (strain1/strain2)	Fold.change2 (strain2/strain1)	log2FoldChange	pvalue	padj	baseMean	lfcSE	stat	notes	contig	baseMean_strain1	baseMean_strain2	Fold.change1 (strain1/strain2)	Fold.change2 (strain2/strain1)	log2FoldChange	pvalue	padj	baseMean	lfcSE	stat	notes	contig	baseMean_strain1	baseMean_strain2	Fold.change1 (strain1/strain2)	Fold.change2 (strain2/strain1)	log2FoldChange	pvalue	padj	baseMean	lfcSE	stat	notes
Gln-UUG	1818.24	1150.89	1.57986	0.632967	0.6586	0.0191365	0.373161	1484.56	0.281109	2.34286		Gln-UUG	1685.04	1193.85	1.41143	0.7085	0.496401	0.0475715	0.43305	1439.45	0.250559	1.98118		Arg-ACG	75990.1	60412.5	1.25785	0.795005	0.330971	0.0096915	0.377969	68201.3	0.127954	2.58665		Gln-UUG	1945.98	1508.25	1.29022	0.77506	0.367291	0.156787	0.792951	1727.12	0.259393	1.41596
Ser-UGA	10428.2	13275.1	0.785548	1.273	-0.347932	0.0124961	0.373161	11851.7	0.139294	-2.49781		Pro-GGG	5596.25	4481.68	1.24869	0.800837	0.320152	0.0666231	0.43305	5038.96	0.174545	1.83421		Gly-GCC	161016	139294	1.15594	0.865096	0.209063	0.0594747	0.609097	150155	0.110928	1.88467		Pro-UGG	3222.69	2516.07	1.28084	0.780735	0.357394	0.146545	0.792951	2869.38	0.246165	1.45184
Glu-UUC	155.126	58.1353	2.66836	0.374762	1.41393	0.130961	0.894146	106.631	0.936177	1.51032		Val-GAC	31639.6	26191.2	1.20803	0.827796	0.272613	0.0402396	0.43305	28915.4	0.132899	2.05128		Val-UAC	60519.9	53479.7	1.13164	0.883671	0.178398	0.0624715	0.609097	56999.8	0.095762	1.86293		Arg-UCU	2039.4	1632.05	1.2496	0.800259	0.32132	0.162403	0.792951	1835.72	0.230002	1.39704
Asn-GUU	21839	17660.6	1.23659	0.808676	0.306301	0.103241	0.894146	19749.8	0.187991	1.62934		Gly-GCC	146962	123189	1.19299	0.838233	0.254587	0.0648263	0.43305	135076	0.137879	1.84645		Ser-GGA	6588.5	7919.71	0.831913	1.20205	-0.265657	0.0474091	0.609097	7254.1	0.133992	-1.98263		Pro-GGG	6472.14	5454.02	1.18667	0.842693	0.2467	0.223653	0.792951	5963.08	0.202733	1.21687
Pro-GGG	6037.21	4941.23	1.2218	0.818463	0.289067	0.143973	0.894146	5489.22	0.197835	1.46115		Trp-CCA	44789.1	38158.4	1.17377	0.851958	0.231162	0.0635508	0.43305	41473.7	0.124594	1.85532		Asn-GUU	22168.2	25647.7	0.864337	1.15696	-0.210453	0.0950576	0.721164	23907.9	0.126072	-1.6693		Val-GAC	36585.1	30884.5	1.18458	0.844184	0.244309	0.122951	0.792951	33734.8	0.158385	1.54251
Arg-UCU	1903.44	1563.56	1.21738	0.821439	0.283731	0.21247	0.894146	1733.5	0.227567	1.2468		Ser-GGA	5996.72	7180.3	0.835163	1.19737	-0.260095	0.0629173	0.43305	6588.51	0.139853	-1.85978		Ser-UGA	10651.4	12377.4	0.860555	1.16204	-0.216641	0.110948	0.721164	11514.4	0.135915	-1.59395		Ile-GAU	50690.6	43825.8	1.15664	0.864574	0.209927	0.0557882	0.792951	47258.2	0.109755	1.91269
Val-GAC	34126.7	28581	1.19403	0.837498	0.255865	0.112171	0.894146	31353.8	0.161072	1.58851		Leu-GAG	1674.19	2223.65	0.752903	1.32819	-0.409164	0.0872366	0.486032	1948.92	0.239255	-1.71016		Ser-CGA	1.34636	0.301655	4.46322	0.224053	1.8611	0.451184	0.765474	0.824005	2.47013	0.753442		Trp-CCA	51764.8	44762.2	1.15644	0.864723	0.209643	0.135087	0.792951	48263.5	0.140292	1.49434
Gly-GCC	158407	140351	1.12865	0.88601	0.174602	0.194863	0.894146	149379	0.13469	1.29633		Arg-UCU	1764.53	1419.34	1.24321	0.80437	0.314083	0.144699	0.588485	1591.94	0.215344	1.45851		fMet-CAU	6568.31	5168.89	1.27074	0.786944	0.345652	0.471061	0.765474	5868.6	0.47957	0.720754		Gly-GCC	169880	149410	1.13701	0.8795	0.185235	0.142528	0.792951	159645	0.126316	1.46644
Trp-CCA	48288.3	43388	1.11294	0.898522	0.1544	0.268876	0.894146	45838.2	0.139646	1.10566		Asp-GUC	95229.2	83636.7	1.13861	0.878267	0.18731	0.150893	0.588485	89433	0.130404	1.43638		His-GUG	943.669	771.92	1.2225	0.817998	0.290005	0.252693	0.765474	857.794	0.253538	1.14383		Ala-UGC	134517	121124	1.11057	0.900439	0.151287	0.194761	0.792951	127820	0.116678	1.29662
Asp-GUC	102511	92959.7	1.10275	0.906824	0.141109	0.241703	0.894146	97735.5	0.12053	1.17074		Met-CAU	3173.66	3869.01	0.820278	1.2191	-0.285997	0.130191	0.588485	3521.34	0.188983	-1.51335		Arg-CCG	6446.26	5526.87	1.16635	0.857375	0.222041	0.202248	0.765474	5986.56	0.174126	1.27517		Lys-UUU	97191.7	88847.7	1.09391	0.914149	0.129485	0.210774	0.792951	93019.7	0.103468	1.25144
Lys-UUU	90545.7	83761	1.081	0.925069	0.112377	0.273787	0.894146	87153.4	0.102685	1.09438		Ala-UGC	116356	104385	1.11468	0.897119	0.156631	0.189871	0.607567	110370	0.119478	1.31096		Thr-GGU	1987.08	1705.51	1.16509	0.858302	0.22036	0.469039	0.765474	1846.3	0.304346	0.724044		Leu-GAG	1935.38	2408.94	0.803417	1.24468	-0.315615	0.217408	0.792951	2172.16	0.25588	-1.23345
Ser-GGA	6450.41	7115.88	0.906482	1.10317	-0.141693	0.275122	0.894146	6783.14	0.129833	-1.09134		Lys-UUU	84042.7	76389	1.10019	0.908931	0.137761	0.190428	0.607567	80215.9	0.105216	1.30931		Thr-CGU	407.99	352.043	1.15892	0.862871	0.212657	0.397977	0.765474	380.016	0.251594	0.845239		Glu-UUC	165.388	91.9482	1.79871	0.555955	0.844489	0.289945	0.807703	128.668	0.798011	1.05824
Ser-CGA	1.30754	0.576109	2.26961	0.440604	0.984303	0.493009	0.975412	0.941825	1.43583	0.68553		Leu-UAG	6422.53	7181.86	0.894272	1.11823	-0.161167	0.202522	0.607567	6802.19	0.126465	-1.2744		Pro-UGG	3054.72	2738.77	1.11536	0.896571	0.157667	0.393145	0.765474	2896.74	0.184638	0.853929		Asn-GUU	23408.2	20569.3	1.13802	0.878722	0.186425	0.278314	0.807703	21988.8	0.17196	1.08412
Phe-GAA	59.1771	51.3337	1.15279	0.86746	0.18187	0.605096	0.975412	55.2554	0.35172	0.517086		Pro-UGG	2787.45	2470.35	1.12836	0.886242	0.173671	0.315771	0.616239	2628.9	0.17312	1.00319		Pro-GGG	6129.74	5508.38	1.1128	0.898633	0.153953	0.367733	0.765474	5819.06	0.17092	0.900729		Thr-GGU	2079.34	2692.01	0.772413	1.29464	-0.372278	0.272389	0.807703	2385.68	0.339181	-1.09758
Pro-UGG	3004.72	2665.75	1.12716	0.887188	0.172604	0.381176	0.975412	2835.24	0.197097	0.875731		Asn-GUU	20247.1	18382.9	1.10141	0.907927	0.139189	0.347622	0.616239	19315	0.148198	0.939212		Asp-GUC	104425	95516	1.09328	0.914682	0.128694	0.246591	0.765474	99970.6	0.111071	1.15867		His-GUG	990.299	1186.37	0.83473	1.19799	-0.26043	0.311572	0.810087	1088.33	0.25736	-1.01193
Arg-ACG	74403.2	69953.1	1.06361	0.94019	0.0889302	0.547292	0.975412	72178.2	0.147768	0.601823		Gly-CCC	5793.26	6395.1	0.905891	1.10389	-0.142642	0.33823	0.616239	6094.18	0.148947	-0.957669		Val-GAC	34652.6	32239.1	1.07486	0.93035	0.104036	0.407847	0.765474	33445.8	0.125695	0.827688		Cys-GCA	17703.5	16333.7	1.08386	0.922627	0.116141	0.36717	0.873643	17018.6	0.128789	0.901788
Val-UAC	59251.8	56330.4	1.05186	0.950696	0.0729439	0.461878	0.975412	57791.1	0.0991412	0.735758		Ser-UGA	9687.12	10759.4	0.900341	1.11069	-0.1514	0.314855	0.616239	10223.3	0.150634	-1.00509		Ala-UGC	127532	119722	1.06524	0.938757	0.0911508	0.390157	0.765474	123627	0.106072	0.859332		Leu-CAA	22903.5	21240.2	1.07831	0.927379	0.108733	0.450522	0.873643	22071.8	0.144104	0.754544
Leu-UAG	6910.47	6667.68	1.03641	0.964868	0.0515234	0.661833	0.975412	6789.07	0.117799	0.437384		Tyr-GUA	11699.3	13074.6	0.89481	1.11756	-0.160174	0.255221	0.616239	12386.9	0.14078	-1.13776		Ala-GGC	71636.3	67310.7	1.06426	0.939618	0.0898154	0.284878	0.765474	69473.5	0.0839847	1.06943		Ala-GGC	75427.1	72437.8	1.04127	0.960369	0.0583584	0.549137	0.873643	73932.4	0.0974177	0.599054
Gly-UCC	17686.2	17086.5	1.0351	0.966093	0.0497557	0.690843	0.975412	17386.3	0.125105	0.397711		His-GUG	857.061	1050.99	0.815479	1.22627	-0.293994	0.272457	0.616239	954.026	0.267895	-1.09742		Lys-UUU	92216.9	86907.3	1.06109	0.942423	0.0855096	0.332298	0.765474	89562.1	0.0882	0.969497		Asp-GUC	110023	107950	1.0192	0.981162	0.0274227	0.827104	0.873643	108986	0.125552	0.218417
Met-CAU	3410.22	3294.57	1.0351	0.966088	0.0492456	0.795691	0.975412	3352.39	0.190191	0.258927		Ile2-CAU	22.1841	27.8153	0.797552	1.25384	-0.344879	0.325357	0.616239	24.9997	0.350662	-0.98351		Ile-GAU	48074.2	51910.3	0.926102	1.07979	-0.110759	0.211394	0.765474	49992.3	0.0886253	-1.24974		Gly-UCC	18991.6	18725.3	1.01422	0.985977	0.0203185	0.851242	0.873643	18858.4	0.108346	0.187534
Ile-GAU	47239.5	45721.3	1.03321	0.96786	0.0472141	0.733192	0.975412	46480.4	0.138506	0.340883		Thr-UGU	11671.8	15472.8	0.754346	1.32565	-0.406699	0.243578	0.616239	13572.3	0.348771	-1.16609		Leu-CAA	21738	24037.3	0.904343	1.10578	-0.145129	0.223633	0.765474	22887.6	0.119259	-1.21692		Ser-GGA	6931.45	7097.98	0.976539	1.02402	-0.0341025	0.832869	0.873643	7014.71	0.161605	-0.211024
Leu-CAG	51810.4	50296.1	1.03011	0.970771	0.0428392	0.675852	0.975412	51053.3	0.102454	0.41813		fMet-CAU	5948.4	8272.84	0.719028	1.39077	-0.475884	0.309553	0.616239	7110.62	0.468316	-1.01616		Met-CAU	3493.71	3876.94	0.901152	1.10969	-0.150124	0.441005	0.765474	3685.33	0.194841	-0.770497		Leu-UAG	7425.73	7640.59	0.971879	1.02893	-0.041024	0.768171	0.873643	7533.16	0.139174	-0.294769
Leu-UAA	1378.32	1339.71	1.02882	0.971988	0.0410684	0.836682	0.975412	1359.01	0.199227	0.206139		Leu-CAG	48129.3	51055.5	0.942687	1.0608	-0.0850805	0.371558	0.626189	49592.4	0.0952154	-0.893559		Tyr-GUA	12880.8	14682.8	0.877272	1.1399	-0.18883	0.205569	0.765474	13781.8	0.149173	-1.26584		Ser-GCU	13462.9	13866.7	0.970879	1.02999	-0.0426906	0.748523	0.873643	13664.8	0.133164	-0.320588
Thr-CGU	398.308	387.087	1.02899	0.971829	0.0405781	0.875369	0.975412	392.698	0.25872	0.156842		Gly-UCC	16424.2	17517	0.937612	1.06654	-0.0928662	0.385347	0.626189	16970.6	0.106978	-0.868086		Ile2-CAU	24.4208	32.3956	0.753829	1.32656	-0.427618	0.267661	0.765474	28.4082	0.385776	-1.10846		Tyr-GUA	13540.4	13965.5	0.969566	1.03139	-0.0445197	0.753646	0.873643	13752.9	0.141857	-0.313835
Ala-UGC	125402	123569	1.01483	0.985383	0.0212404	0.86125	0.975412	124486	0.121524	0.174783		Thr-GGU	1800.05	2423.84	0.742646	1.34654	-0.429341	0.424818	0.662716	2111.94	0.53796	-0.798091		Arg-UCU	1930.58	1750.07	1.10315	0.906496	0.141595	0.495129	0.7724	1840.33	0.207564	0.682175		Leu-UAA	1482.28	1533.91	0.966343	1.03483	-0.049165	0.816551	0.873643	1508.1	0.211933	-0.231983
Ser-GCU	12550.1	12950.3	0.969096	1.03189	-0.0452398	0.752328	0.975412	12750.2	0.143359	-0.315571		Glu-UUC	143.135	116.026	1.23365	0.810605	0.297002	0.508158	0.707792	129.58	0.448842	0.661708		Thr-UGU	12864.2	11063.9	1.16272	0.860052	0.21752	0.558185	0.837277	11964	0.371487	0.58554		Arg-ACG	79937.8	82948.3	0.963706	1.03766	-0.0533366	0.712759	0.873643	81443	0.144876	-0.368154
Thr-GGU	1928.08	1998.85	0.964595	1.0367	-0.0524596	0.866238	0.975412	1963.47	0.311445	-0.168439		Phe-GAA	55.0997	46.1547	1.1938	0.837658	0.240837	0.481852	0.707792	50.6272	0.342426	0.703327		Leu-GAG	1845.96	2007.75	0.919419	1.08764	-0.121083	0.624318	0.901793	1926.86	0.24724	-0.48974		Leu-CAG	55642.3	57916.5	0.960734	1.04087	-0.0578293	0.59458	0.873643	56779.4	0.108659	-0.532211
Gly-CCC	6230.63	6479.95	0.961525	1.04001	-0.0566277	0.716066	0.975412	6355.29	0.15569	-0.363721		Cys-GCA	15303.8	14313.7	1.06917	0.935305	0.0965952	0.501581	0.707792	14808.7	0.143742	0.672004		Gln-UUG	1840.04	1745.23	1.05432	0.948475	0.0762606	0.749009	0.989574	1792.64	0.238355	0.319946		Val-UAC	63671.4	66642.3	0.95542	1.04666	-0.0657906	0.515994	0.873643	65156.8	0.101289	-0.649533
Ala-GGC	70214.8	73333.5	0.957472	1.04442	-0.0626957	0.496523	0.975412	71774.1	0.0922036	-0.67997		Arg-ACG	69204.2	65746.4	1.05259	0.950035	0.073956	0.588955	0.740943	67475.3	0.136866	0.540351		Arg-CCU	979.366	951.065	1.02976	0.971103	0.0427402	0.849064	0.989574	965.215	0.224579	0.190312		Ser-UGA	11208.3	11755.3	0.953463	1.04881	-0.0687106	0.603738	0.873643	11481.8	0.132382	-0.519032
fMet-CAU	6370.04	6729.6	0.946571	1.05645	-0.0792608	0.859285	0.975412	6549.82	0.447084	-0.177284		Ala-GGC	65207.7	63046.4	1.03428	0.966855	0.0486401	0.581375	0.740943	64127	0.0882154	0.551378		Leu-UAA	1410.2	1379.27	1.02242	0.978067	0.0321454	0.868097	0.989574	1394.74	0.193558	0.166076		Ile2-CAU	25.6781	27.3888	0.937541	1.06662	-0.0741231	0.831612	0.873643	26.5335	0.348594	-0.212635
Arg-CCG	6296.19	6674.34	0.943342	1.06006	-0.0844726	0.633628	0.975412	6485.26	0.17723	-0.476627		Ser-CGA	1.22426	1.57834	0.77566	1.28922	-0.581283	0.557109	0.740943	1.4013	0.990023	-0.587141		Cys-GCA	16796.6	16465.3	1.02013	0.980271	0.0287328	0.807027	0.989574	16631	0.117631	0.244263		Thr-CGU	428.546	456.128	0.939529	1.06436	-0.0897642	0.704006	0.873643	442.337	0.236273	-0.379918
Tyr-GUA	12587.6	13458.6	0.935283	1.0692	-0.0963293	0.556187	0.975412	13023.1	0.163682	-0.588514		Thr-CGU	370.638	344.196	1.07682	0.928657	0.106535	0.677725	0.766156	357.417	0.256358	0.41557		Gly-UCC	18030.3	17796.9	1.01311	0.987058	0.0187759	0.824264	0.989574	17913.6	0.0845519	0.222064		Gly-CCC	6702.05	7134.12	0.939437	1.06447	-0.0899696	0.563211	0.873643	6918.08	0.155636	-0.578079
Leu-GAG	1796.57	1957.95	0.917577	1.08983	-0.124152	0.608134	0.975412	1877.26	0.242134	-0.51274		Ser-GCU	11650.2	11176.2	1.04241	0.959313	0.0598872	0.680306	0.766156	11413.2	0.145341	0.412046		Leu-CAG	52841.4	52525.8	1.00601	0.994028	0.00866142	0.903209	0.989574	52683.6	0.0712238	0.121608		Met-CAU	3669.33	3967.9	0.924754	1.08137	-0.112616	0.595018	0.873643	3818.62	0.211851	-0.531578
Leu-CAA	21327.1	23486.7	0.90805	1.10126	-0.139057	0.375661	0.975412	22406.9	0.156964	-0.885919		Leu-CAA	19790.9	20646	0.958582	1.04321	-0.0609509	0.67283	0.766156	20218.4	0.144342	-0.422267		Trp-CCA	49040	48803.2	1.00485	0.99517	0.00692397	0.948836	0.989574	48921.6	0.107904	0.0641681		Phe-GAA	63.6866	70.094	0.908589	1.10061	-0.12911	0.678643	0.873643	66.8903	0.311622	-0.414316
Ile2-CAU	23.8747	27.7169	0.861376	1.16093	-0.202901	0.581858	0.975412	25.7958	0.36846	-0.550672		Leu-UAA	1281.84	1354.33	0.946479	1.05655	-0.0793432	0.688023	0.766156	1318.08	0.197598	-0.40154		Leu-UAG	7057.19	7023.53	1.00479	0.995231	0.0068785	0.956317	0.989574	7040.36	0.125575	0.054776		Arg-CCG	6772.06	7425.18	0.91204	1.09644	-0.132762	0.458457	0.873643	7098.62	0.179071	-0.74139
Cys-GCA	16491.6	16522.8	0.99811	1.00189	-0.00263454	0.985294	0.985294	16507.2	0.142934	-0.0184318		Arg-CCU	889.838	946.691	0.939945	1.06389	-0.0901525	0.707221	0.766156	918.265	0.240028	-0.375591		Glu-UUC	155.488	155.825	0.997838	1.00217	-0.0057725	0.989574	0.989574	155.657	0.441752	-0.0130673		Arg-CCU	1028.5	1177.92	0.873147	1.14528	-0.195296	0.41431	0.873643	1103.21	0.239235	-0.816333
Arg-CCU	955.916	962.994	0.99265	1.0074	-0.0114175	0.962902	0.985294	959.455	0.245476	-0.0465117		Ile-GAU	43832.8	44937.8	0.975412	1.02521	-0.0358331	0.746808	0.787176	44385.3	0.11099	-0.322851		Phe-GAA	60.6652	61.4615	0.987043	1.01313	-0.00792349	0.98089	0.989574	61.0633	0.33079	-0.0239532		fMet-CAU	6871.23	8141.18	0.844009	1.18482	-0.244637	0.680457	0.873643	7506.21	0.594011	-0.41184
Thr-UGU	12515.4	12615.8	0.992044	1.00802	-0.0116353	0.96122	0.985294	12565.6	0.239297	-0.0486229		Arg-CCG	5860.23	6045.69	0.969324	1.03165	-0.0450171	0.796121	0.817071	5952.96	0.174234	-0.258371		Ser-GCU	12767.4	13042.3	0.978928	1.02153	-0.0306343	0.792018	0.989574	12904.8	0.116175	-0.26369		Thr-UGU	13482.2	16441.6	0.820005	1.2195	-0.286275	0.435181	0.873643	14961.9	0.366852	-0.780356
His-GUG	920.044	934.144	0.984906	1.01533	-0.0229782	0.931667	0.985294	927.094	0.267976	-0.0857475		Val-UAC	55080.7	55086.7	0.99989	1.00011	-0.000153654	0.998724	0.998724	55083.7	0.0961012	-0.00159887		Gly-CCC	6376.68	6621.48	0.963029	1.03839	-0.0542865	0.72223	0.989574	6499.08	0.152713	-0.35548		Ser-CGA	1.40835	1.39703	1.0081	0.991965	0.0404602	0.980221	0.980221	1.40269	1.63202	0.0247915

## Sheet: evolved_vs_sbw25
Pairwise comparisons of the expression levels of tRNA types in the mature tRNA pool. Using the aligned YAMAT-seq read data (supplemental file 7) as input, DESeq2 output consists of: baseMean1 and baseMean2 (the normalized mean expression level of three replicates of strain 1 and strain 2); fold.change1 and fold.change2 (fold change calculated by baseMean1/baseMean2 or baseMean2/baseMean1, respect…
1: SBW25 (strain 1, wild type) versus M1-L (strain 2)												2: SBW25 (strain 1) versus M2-L (strain 2)												3: SBW25 (strain 1: wild type) versus M2-Lop (strain 2)												4: SBW25 (strain 1: wild type) versus M3-L (strain 2)												5: SBW25 (strain 1: wild type) versus M4-L (strain 2)
Result: Ser-CGA expression is higher in SBW25; Ser-UGA expression is higher in M1-L												Result: Ser-CGA, Pro-GGG, Trp-CCA, Val-GAC, Ala-UGC expression is higher in SBW25; Ser-UGA expression is higher in M2-L												Result: Ser-CGA expression is higher in SBW25; Ser-UGA, Gln-UUG, Asn-GUU expression is higher in M2-Lop												Result: Ser-CGA, Leu-CAA, Ile-GAU expression is higher in SBW25; Phe-GAA, Ser-UGA, Gln-UUG expression is higher in M3-L												Result: Ser-CGA expression is higher in SBW25; Ser-UGA expression is higher in M4-L
contig	baseMean_strain1	baseMean_strain2	Fold.change1 (strain1/strain2)	Fold.change2 (strain2/strain1)	log2FoldChange	pvalue	padj	baseMean	lfcSE	stat	notes	contig	baseMean_strain1	baseMean_strain2	Fold.change1 (strain1/strain2)	Fold.change2 (strain2/strain1)	log2FoldChange	pvalue	padj	baseMean	lfcSE	stat	notes	contig	baseMean_strain1	baseMean_strain2	Fold.change1 (strain1/strain2)	Fold.change2 (strain2/strain1)	log2FoldChange	pvalue	padj	baseMean	lfcSE	stat	notes	contig	baseMean_strain1	baseMean_strain2	Fold.change1 (strain1/strain2)	Fold.change2 (strain2/strain1)	log2FoldChange	pvalue	padj	baseMean	lfcSE	stat	notes	contig	baseMean_strain1
Ser-CGA	14776.4	0.572143	25826.4	3.872e-05	14.4561	3.12761e-46	1.21977e-44	7388.49	1.01268	14.2751	higher in (ancestral) SBW25 than (enigineered and then evolved) M1-L	Ser-CGA	13908.9	1.55237	8959.81	0.00011161	12.9433	1.3986e-85	5.45453e-84	6955.23	0.660202	19.6051	higher expression in SBW25 than M2-L	Ser-CGA	15467.1	0.299786	51593.9	1.93821e-05	15.3637	1.14141e-38	4.4515e-37	7733.71	1.18134	13.0053	higher in (ancestral) SBW25 than (enigineered and then evolved) M2-Lop	Ser-CGA	15802.1	1.36086	11611.8	8.61191e-05	13.5979	2.57366e-76	1.00373e-74	7901.74	0.735496	18.4881	higher in (ancestral) SBW25 than (enigineered and then evolved) M3-L	Ser-CGA	15685
Ser-UGA	5974.33	13220.6	0.451895	2.2129	-1.14627	9.70576e-10	1.89262e-08	9597.47	0.187477	-6.11418	higher in (enigineered and then evolved) M1-L than (ancestral) SBW25	Pro-GGG	5557.68	4406.87	1.26114	0.792933	0.333198	9.89489e-07	1.28634e-05	4982.28	0.0680868	4.89372	higher expression in SBW25 than M2-L	Ser-UGA	6265.69	12364.4	0.506752	1.97335	-0.980905	0.000406477	0.00396315	9315.05	0.277418	-3.53584	higher in (enigineered and then evolved) M2-Lop than (ancestral) SBW25	Leu-CAA	28987.3	20925.6	1.38525	0.721889	0.470015	0.00137411	0.00893173	24956.4	0.146878	3.20003	higher in (ancestral) SBW25 than (enigineered and then evolved) M3-L	Ser-UGA	6338.84
Thr-GGU	1396.57	1985.74	0.7033	1.42187	-0.507482	0.0209237	0.272009	1691.15	0.21975	-2.30936		Trp-CCA	46514.7	37516.5	1.23985	0.806551	0.310218	5.50724e-06	5.36956e-05	42015.6	0.0682628	4.54447	higher expression in SBW25 than M2-L	Gln-UUG	1068.77	1743.21	0.613102	1.63105	-0.704328	2.81309e-10	5.48553e-09	1405.99	0.111643	-6.30874	higher in (enigineered and then evolved) M2-Lop than (ancestral) SBW25	Ile-GAU	56529.3	43141.1	1.31034	0.763163	0.38994	1.80783e-06	2.95444e-05	49835.2	0.0816834	4.7738	higher in (ancestral) SBW25 than (enigineered and then evolved) M3-L	Gln-UUG	1086.52
Gly-UCC	19728.2	16998.2	1.16061	0.861617	0.214811	0.0437618	0.426677	18363.2	0.106534	2.01637		Val-GAC	29323.6	25752.2	1.13868	0.878209	0.187424	0.000981113	0.00637724	27537.9	0.0568659	3.29589	higher expression in SBW25 than M2-L	Asn-GUU	20068.5	25610.9	0.783591	1.27618	-0.352195	0.000215631	0.00280321	22839.7	0.0951887	-3.69996	higher in (enigineered and then evolved) M2-Lop than (ancestral) SBW25	Phe-GAA	35.5308	68.9344	0.515429	1.94013	-0.934307	0.00105517	0.00823036	52.2326	0.285251	-3.27539	higher in (enigineered and then evolved) M3-L than (ancestral) SBW25	Leu-CAA	28783.5
Glu-UUC	99.8738	58.1072	1.71878	0.581806	0.774894	0.0972936	0.430915	78.9905	0.467334	1.65812		Ala-UGC	115057	102631	1.12108	0.892	0.165036	8.72569e-09	1.70151e-07	108844	0.0286828	5.7538	higher expression in SBW25 than M2-L	Met-CAU	3041.86	3872.35	0.785535	1.27302	-0.347488	0.00202583	0.0158015	3457.11	0.112586	-3.08642		Ser-UGA	6378.5	11582	0.550723	1.81579	-0.861044	2.27264e-06	2.95444e-05	8980.27	0.182134	-4.72753	higher in (enigineered and then evolved) M3-L than (ancestral) SBW25	Leu-CAG	59869.5
Pro-GGG	5898.82	4924.61	1.19782	0.834848	0.260592	0.110491	0.430915	5411.72	0.163279	1.59599		Ser-UGA	5614.22	10583.6	0.530463	1.88514	-0.914992	1.86773e-05	0.000145683	8098.92	0.213776	-4.28014	higher in (enigineered and then evolved) M2-L than (ancestral) SBW25	Arg-CCG	6763.2	5519.96	1.22523	0.816175	0.293534	0.0279278	0.139856	6141.58	0.133528	2.1983		Gln-UUG	1096.44	1483.72	0.738978	1.35322	-0.435451	0.000339404	0.00330919	1290.08	0.121525	-3.5832	higher in (enigineered and then evolved) M3-L than (ancestral) SBW25	Ile-GAU	56061.7
Ile-GAU	52797.9	45567.3	1.15868	0.863052	0.212598	0.0975633	0.430915	49182.6	0.12832	1.65678		Met-CAU	2746.21	3803.16	0.722088	1.38487	-0.469636	0.00288703	0.0160849	3274.68	0.157621	-2.97952		Gly-UCC	20648.1	17775.3	1.16162	0.860866	0.215948	0.0220227	0.139856	19211.7	0.0943015	2.28998		Thr-GGU	1498.47	2645.75	0.566367	1.76564	-0.819017	0.00346232	0.0192901	2072.11	0.280159	-2.9234		Gly-UCC	20952.9
Trp-CCA	49389.1	43209.7	1.14301	0.874884	0.192894	0.0715335	0.430915	46299.4	0.10704	1.80208		Thr-UGU	10621.5	15208	0.698419	1.4318	-0.517651	0.00333636	0.0162647	12914.7	0.176377	-2.93492		Leu-CAG	58984.6	52464.4	1.12428	0.88946	0.168947	0.0293995	0.139856	55724.5	0.0775666	2.17809		Ala-UGC	130690	119244	1.09599	0.912417	0.132207	0.00473218	0.0230694	124967	0.0468037	2.82472		Phe-GAA	35.2087
Leu-CAG	56367.6	50095.8	1.12519	0.888736	0.170208	0.0930785	0.430915	53231.7	0.101352	1.67938		Leu-UAG	5959.63	7061.01	0.84402	1.18481	-0.244004	0.0057828	0.0250588	6510.32	0.0884119	-2.75985		Glu-UUC	104.719	155.531	0.673299	1.48522	-0.581763	0.0341493	0.139856	130.125	0.274636	-2.1183		Val-UAC	56191.9	65576.4	0.856892	1.16701	-0.222736	0.0164193	0.0711502	60884.2	0.0928278	-2.39946		Ser-GGA	7725.59
Phe-GAA	33.1484	50.957	0.650518	1.53724	-0.635691	0.101501	0.430915	42.0527	0.38818	-1.63762		Arg-UCU	1637.72	1395.54	1.17354	0.852121	0.233791	0.00753	0.029367	1516.63	0.0874818	2.67245		Phe-GAA	34.6049	61.4286	0.563335	1.77514	-0.814013	0.0358604	0.139856	48.0167	0.387901	-2.09851		Trp-CCA	52838.6	44051.4	1.19948	0.833697	0.262337	0.022244	0.0867517	48445	0.114749	2.28618		Thr-GGU	1486.01
Leu-CAA	27120.2	23393.6	1.1593	0.862591	0.213264	0.143008	0.507029	25256.9	0.145604	1.46468		Thr-GGU	1319.97	2381.38	0.554289	1.80411	-0.850976	0.0110233	0.0390825	1850.68	0.334772	-2.54196		Leu-CAA	28405.6	24004.5	1.18335	0.845061	0.242583	0.0418641	0.148427	26205	0.119213	2.03487		Thr-UGU	12061.7	16156.7	0.746545	1.3395	-0.421482	0.0283921	0.100663	14109.2	0.192297	-2.19183		Glu-UUC	106.135
Ala-GGC	68347.3	72963.8	0.936729	1.06754	-0.094343	0.17117	0.556301	70655.6	0.0689412	-1.36846		Gln-UUG	964.94	1173.73	0.822115	1.21637	-0.283242	0.0178587	0.0580408	1069.33	0.119585	-2.36853		Pro-GGG	6171.48	5500.39	1.12201	0.89126	0.165234	0.116868	0.363436	5835.94	0.105375	1.56806		Gly-UCC	21104.2	18435.7	1.14475	0.873557	0.194869	0.0346928	0.112751	19770	0.0922707	2.11193		Tyr-GUA	14454.8
Arg-UCU	1736.85	1557.24	1.11534	0.896585	0.158927	0.236162	0.669007	1647.05	0.134157	1.18464		Gly-GCC	132080	121116	1.09052	0.916993	0.125099	0.0208236	0.0624709	126598	0.0541281	2.31117		Ala-UGC	127694	119543	1.06819	0.936165	0.09508	0.121145	0.363436	123619	0.0613426	1.54998		Arg-UCU	1860.58	1606.6	1.15808	0.863496	0.212906	0.0651578	0.16941	1733.59	0.115448	1.84417		Val-UAC	55729.6
Val-GAC	31102.1	28468.7	1.0925	0.915328	0.127776	0.264738	0.669007	29785.4	0.11457	1.11526		Leu-CAA	25514.2	20305.7	1.25651	0.795856	0.32939	0.0393135	0.102215	22910	0.159829	2.06089		Arg-ACG	67747.4	60337.4	1.12281	0.890624	0.167194	0.130868	0.36456	64042.4	0.110674	1.51069		Met-CAU	3118.69	3903.22	0.799003	1.25156	-0.323041	0.0628844	0.16941	3510.95	0.173677	-1.86001		Leu-GAG	2147.35
Lys-UUU	87821.8	83362	1.0535	0.949218	0.0752087	0.275169	0.669007	85591.9	0.0689206	1.09124		fMet-CAU	5336.2	8129.17	0.656426	1.5234	-0.607105	0.0381025	0.102215	6732.68	0.292757	-2.07375		Gly-GCC	146654	139120	1.05416	0.948626	0.0760451	0.146825	0.381745	142887	0.0524146	1.45084		His-GUG	909.482	1166.54	0.779638	1.28265	-0.356467	0.0579785	0.16941	1038.01	0.188024	-1.89586		Gly-CCC	6860.95
Val-UAC	52446.4	56040.9	0.93586	1.06854	-0.0955563	0.308915	0.669007	54243.7	0.0939126	-1.0175		Ile-GAU	49757	44175.3	1.12635	0.887822	0.171817	0.0432016	0.105304	46966.2	0.0849842	2.02176		Ile2-CAU	20.8597	32.3249	0.645313	1.54964	-0.640202	0.184304	0.44924	26.5923	0.482218	-1.32762		Arg-ACG	69475.9	81533.9	0.85211	1.17356	-0.23084	0.0873571	0.212933	75504.9	0.135033	-1.70951		Trp-CCA	52446
Met-CAU	2910.95	3275.74	0.888638	1.12532	-0.170754	0.262562	0.669007	3093.34	0.152411	-1.12036		Leu-UAA	1190.33	1331.82	0.893763	1.11886	-0.161756	0.0501955	0.108757	1261.08	0.0826006	-1.95829		His-GUG	886.038	770.886	1.14938	0.870037	0.204167	0.241769	0.500725	828.462	0.174416	1.17058		Pro-GGG	6312.49	5372.09	1.17505	0.851026	0.232441	0.157378	0.325801	5842.29	0.164391	1.41395		Asp-GUC	97919.6
fMet-CAU	5643.06	6681.02	0.844641	1.18394	-0.243446	0.308825	0.669007	6162.04	0.239214	-1.01769		Phe-GAA	31.2746	45.3644	0.689409	1.45052	-0.547854	0.0489813	0.108757	38.3195	0.278274	-1.96875		Ile-GAU	55189.5	51849	1.06443	0.939472	0.090049	0.223505	0.500725	53519.2	0.0739768	1.21726		Asp-GUC	98615	106177	0.928783	1.07668	-0.106641	0.153181	0.325801	102396	0.0746586	-1.42838		Gly-GCC	148908
Ile2-CAU	19.9779	27.5904	0.724089	1.38105	-0.44984	0.325926	0.669007	23.7841	0.457921	-0.982352		Ile2-CAU	18.8553	27.3538	0.689312	1.45072	-0.549495	0.0551344	0.113171	23.1045	0.286521	-1.91782		Ala-GGC	71508.5	67214.2	1.06389	0.939946	0.0892237	0.243943	0.500725	69361.4	0.0765745	1.16519		Leu-UAA	1352.28	1508.94	0.896179	1.11585	-0.157179	0.158724	0.325801	1430.61	0.111524	-1.40938		Asn-GUU	20361.9
Gln-UUG	1023.4	1145.43	0.893462	1.11924	-0.164248	0.346626	0.67592	1084.41	0.174518	-0.941154		Lys-UUU	82740.3	75121.2	1.10142	0.907915	0.139369	0.0925727	0.180517	78930.7	0.0828598	1.68198		Arg-CCU	1048.45	949.965	1.10367	0.906065	0.146781	0.278752	0.517683	999.208	0.135516	1.08313		Lys-UUU	94006.7	87465.7	1.07478	0.93042	0.104013	0.170104	0.331703	90736.2	0.0758187	1.37187		Arg-ACG	68944.9
Asn-GUU	19169.5	17589.4	1.08983	0.917574	0.123992	0.387226	0.715743	18379.5	0.1434	0.864659		Gly-UCC	18580.2	17224.4	1.07872	0.927027	0.109318	0.127851	0.226644	17902.3	0.0717957	1.52263		Lys-UUU	91820.1	86788	1.05798	0.945196	0.0812097	0.273017	0.517683	89304	0.0740869	1.09614		Leu-UAG	6770.33	7521.04	0.900186	1.11088	-0.151279	0.238037	0.442069	7145.68	0.128213	-1.17991		Met-CAU	3093.99
Thr-UGU	11247.8	12526.3	0.897932	1.11367	-0.155359	0.403752	0.715743	11887	0.186073	-0.834939		Val-UAC	49473.9	54157.4	0.91352	1.09467	-0.130398	0.126278	0.226644	51815.6	0.0852864	-1.52895		Thr-CGU	393.475	351.526	1.11933	0.893388	0.163806	0.312075	0.530164	372.5	0.162043	1.01088		Thr-CGU	403.72	448.489	0.900178	1.11089	-0.148896	0.27096	0.480339	426.104	0.135255	-1.10085		Arg-CCU	1067.86
Arg-ACG	64833.4	69520	0.932586	1.07229	-0.100693	0.426401	0.723027	67176.7	0.126599	-0.795366		His-GUG	801.215	1032.68	0.775863	1.28889	-0.364414	0.136325	0.231159	916.945	0.244636	-1.48962		Trp-CCA	51681.2	48735	1.06045	0.942992	0.0845199	0.312661	0.530164	50208.1	0.0837117	1.00965		Ser-GGA	7782.2	6984.11	1.11427	0.897446	0.156112	0.287866	0.48812	7383.15	0.146886	1.06282		Arg-CCG	6882.31
Leu-UAA	1262.74	1332.62	0.947563	1.05534	-0.0774099	0.526003	0.820565	1297.68	0.122075	-0.634119		Glu-UUC	93.9965	114.065	0.824059	1.2135	-0.301579	0.175998	0.285996	104.031	0.222867	-1.35318		Leu-UAG	6598.76	7015.29	0.940625	1.06312	-0.088032	0.401302	0.630125	6807.02	0.104888	-0.839297		Pro-UGG	2854.51	2475.83	1.15295	0.867338	0.206041	0.338204	0.507306	2665.17	0.215137	0.95772		Ser-GCU	13331.3
His-GUG	848.258	927.918	0.914153	1.09391	-0.129281	0.523858	0.820565	888.088	0.202822	-0.63741		Leu-GAG	1903.92	2185.4	0.871198	1.14784	-0.198221	0.184148	0.287271	2044.66	0.149253	-1.32809		Thr-GGU	1457.36	1703.08	0.855719	1.16861	-0.223945	0.403926	0.630125	1580.22	0.268317	-0.83463		Val-GAC	33306.2	30411.3	1.09519	0.913083	0.131152	0.337584	0.507306	31858.7	0.136766	0.95895		Cys-GCA	17182.4
Leu-UAG	6318.35	6635.72	0.952172	1.05023	-0.0704509	0.565024	0.847536	6477.04	0.122439	-0.575396		Ala-GGC	64380.2	61991	1.03854	0.962889	0.0544718	0.228678	0.343017	63185.6	0.045251	1.20377		fMet-CAU	5883.02	5161.43	1.1398	0.877344	0.18901	0.491562	0.737344	5522.22	0.274793	0.687826		Cys-GCA	17319.1	16088.6	1.07648	0.92895	0.106229	0.316443	0.507306	16703.8	0.106038	1.00179		Pro-GGG	6265.91
Arg-CCU	1004.67	956.818	1.05001	0.952375	0.0707618	0.681281	0.95937	980.742	0.172289	0.410716		Leu-CAG	53096.4	50198.4	1.05773	0.945421	0.0810521	0.282045	0.407398	51647.4	0.0753456	1.07574		Thr-UGU	11741.1	11051.5	1.0624	0.941265	0.0877496	0.529455	0.739725	11396.3	0.139543	0.628838		Leu-GAG	2161.44	2369.46	0.91221	1.09624	-0.132101	0.363541	0.518454	2265.45	0.145384	-0.908638		Ala-UGC	129688
Leu-GAG	2019.5	1947.86	1.03678	0.964527	0.0518109	0.716438	0.95937	1983.68	0.142642	0.363224		Cys-GCA	15244.9	14077.2	1.08295	0.923406	0.115051	0.374308	0.521357	14661	0.129499	0.888433		Leu-GAG	2113.58	2005.41	1.05394	0.948818	0.0761901	0.53666	0.739725	2059.49	0.123311	0.617871		Ile2-CAU	21.4155	27.0015	0.793121	1.26084	-0.3011	0.377658	0.518454	24.2085	0.341298	-0.88222		Ala-GGC	72583.1
Ser-GGA	7276.24	7078.93	1.02787	0.972883	0.0393898	0.762142	0.95937	7177.59	0.130142	0.302669		Asp-GUC	86823.1	82210.5	1.05611	0.946874	0.0788276	0.400637	0.538788	84516.8	0.0937884	0.840484		Leu-UAA	1319.67	1377.61	0.957938	1.04391	-0.0618661	0.550052	0.739725	1348.64	0.10351	-0.597682		fMet-CAU	6058.8	7991.67	0.75814	1.31902	-0.399328	0.385517	0.518454	7025.23	0.460175	-0.867775		Lys-UUU	93235.8
Tyr-GUA	13615	13412	1.01514	0.985088	0.0218369	0.878917	0.95937	13513.5	0.143341	0.152342		Ser-GCU	11809.1	10992	1.07433	0.93081	0.103255	0.459874	0.597837	11400.5	0.139712	0.739054		Arg-UCU	1814.47	1748.05	1.038	0.963395	0.0549943	0.584802	0.760243	1781.26	0.100651	0.546384		Tyr-GUA	14574.2	13752.8	1.05973	0.943639	0.0836526	0.413321	0.531834	14163.5	0.102257	0.818064		His-GUG	902.571
Gly-GCC	140180	139660	1.00373	0.996288	0.00540731	0.885572	0.95937	139920	0.0375744	0.143909		Thr-CGU	355.359	338.391	1.05014	0.952252	0.0730614	0.52941	0.666032	346.875	0.116172	0.628907		Val-UAC	54793.9	53404.5	1.02602	0.974643	0.0370984	0.668565	0.814813	54099.2	0.0866544	0.428119		Leu-CAG	60309.1	57016.2	1.05775	0.945401	0.0809452	0.42274	0.531834	58662.7	0.10097	0.801677		Leu-UAA	1341.01
Ala-UGC	122096	123001	0.992638	1.00742	-0.0105955	0.780121	0.95937	122548	0.0379547	-0.279161		Arg-ACG	61191.8	64622	0.946919	1.05606	-0.0786355	0.586545	0.714852	62906.9	0.144591	-0.543849		Ser-GGA	7616.28	7909.58	0.962919	1.03851	-0.0551192	0.648121	0.814813	7762.93	0.120776	-0.456375		Gly-GCC	150016	147066	1.02006	0.980333	0.0286071	0.460669	0.56144	148541	0.0387764	0.737746		Leu-UAG	6711.22
Cys-GCA	16182.3	16451.8	0.983622	1.01665	-0.0237025	0.834346	0.95937	16317.1	0.113338	-0.209131		Pro-UGG	2512.47	2429.27	1.03425	0.966886	0.0483633	0.634837	0.728195	2470.87	0.101833	0.47493		Cys-GCA	16924.1	16447	1.02901	0.971807	0.0411114	0.708355	0.837147	16685.5	0.109904	0.374066		Glu-UUC	106.719	90.7812	1.17557	0.850653	0.220135	0.511859	0.594416	98.7502	0.3356	0.655946		Arg-UCU	1844.58
Thr-CGU	376.772	384.824	0.979076	1.02137	-0.0306112	0.852012	0.95937	380.798	0.16409	-0.186551		Gly-CCC	6084.47	6289.48	0.967405	1.03369	-0.0485644	0.621623	0.728195	6186.97	0.098398	-0.493551		Tyr-GUA	14234.6	14668.7	0.970407	1.0305	-0.0433987	0.733173	0.840993	14451.7	0.127303	-0.340908		Arg-CCU	1077.45	1158.79	0.92981	1.07549	-0.101808	0.518208	0.594416	1118.12	0.157571	-0.646109		Val-GAC	33043.3
Arg-CCG	6471.98	6631.86	0.975891	1.0247	-0.0353026	0.836226	0.95937	6551.92	0.170772	-0.206723		Ser-GGA	6850.6	7061.84	0.970087	1.03084	-0.0445597	0.667878	0.744207	6956.22	0.103854	-0.429062		Gly-CCC	6762.66	6613.91	1.02249	0.978005	0.0316192	0.788864	0.87902	6688.29	0.118076	0.267786		Ala-GGC	73131.6	71327.4	1.02529	0.975331	0.0360293	0.62375	0.695035	72229.5	0.0734478	0.490543		Thr-UGU	11958.8
Ser-GCU	12552.4	12894.6	0.973459	1.02726	-0.0388941	0.781867	0.95937	12723.5	0.140469	-0.276887		Arg-CCG	6108.19	5942.81	1.02783	0.972926	0.0397816	0.813794	0.88161	6025.5	0.168899	0.235535		Pro-UGG	2781.51	2736.1	1.0166	0.983674	0.0250449	0.818933	0.887178	2758.81	0.109406	0.228917		Arg-CCG	6935.11	7300.58	0.94994	1.0527	-0.0737484	0.656979	0.711727	7117.84	0.166067	-0.444088		fMet-CAU	6003.48
Pro-UGG	2663.79	2655.78	1.00301	0.996995	0.00490104	0.975274	0.977566	2659.78	0.158127	0.0309944		Arg-CCU	948.657	930.773	1.01921	0.981148	0.0278	0.874804	0.92209	939.715	0.176441	0.15756		Asp-GUC	96506.3	95429.8	1.01128	0.988845	0.0162119	0.843353	0.88894	95968.1	0.0820415	0.197607		Gly-CCC	6911.9	7023.9	0.984054	1.0162	-0.0233196	0.845522	0.867772	6967.9	0.119689	-0.194836		Pro-UGG	2828.92
Gly-CCC	6461.71	6441.89	1.00308	0.996933	0.00408859	0.977566	0.977566	6451.8	0.145392	0.0281211		Asn-GUU	18052.8	18077.1	0.998653	1.00135	-0.00238187	0.979643	0.979643	18064.9	0.0933447	-0.0255169		Val-GAC	32513.2	32184.7	1.01021	0.989897	0.0144585	0.869402	0.892281	32349	0.0879371	0.164418		Ser-GCU	13411.3	13659.7	0.981811	1.01853	-0.0266972	0.836773	0.867772	13535.5	0.129584	-0.206023		Ile2-CAU	21.2316
Asp-GUC	92194	92517.4	0.996505	1.00351	-0.00505359	0.937293	0.977566	92355.7	0.0642355	-0.0786729		Tyr-GUA	12827.7	12854.2	0.997937	1.00207	-0.00276048	0.971295	0.979643	12841	0.0767125	-0.0359847		Ser-GCU	13159	13029.6	1.00993	0.990166	0.0140632	0.916631	0.916631	13094.3	0.134347	0.104678		Asn-GUU	20503.5	20257.9	1.01213	0.988019	0.0172621	0.910549	0.910549	20380.7	0.15365	0.112346		Thr-CGU	400.156
[truncated: 11 more columns]
