# Supplementary material for: The birth of a bacterial tRNA gene by large-scale, tandem duplication events
Source: eLife. 2020 Oct 30;9:e57947. doi: 10.7554/eLife.57947 (PMC7661048; doi:10.7554/eLife.57947)
Supplement: Supplementary file 1. — A list of 62 theoretically possible tRNA types (61 elongator tRNAs and one initiator tRNA) is provided. Of these, 23 are absent from the SBW25 tRNA gene set. Codon-tRNA matching patterns are based on the G-U wobble rule (Crick, 1966), and post-transcriptional modifications predicted using a combination of MODOMICS (Boccaletto et al., 2018), tRNAmod (Panwar and Raghava, 2014), and tRNAmodpred (Machnicka et al., 2016). Following current wobble rules (described in Agris et al., 2018) and the predicted post-transcriptional modifications, the 39 tRNA types present in SBW25 are split into 33 theoretically essential types (pink highlighting) and six theoretically non-essential types (green highlighting). Gene copy numbers and genome-wide proportions of codon use (from GtRNAdb; Chan and Lowe, 2016) are listed for each tRNA type present. Further notes are provided where appropriate. [file elife-57947-supp1.xlsx]

## Sheet: SBW25_tRNA_types
List of theoretical tRNA types, and their presence/absence in Pseudomonas fluorescens SBW25
putative essential tRNA types
putative non-essential tRNA types
no highlighting = absent tRNA types
Codon proportions are genome wide, and come from GtRNAdb 2.0 (Chan and Lowe, 2016; https://doi.org/10.1093/nar/gkv1309)
aminoacid	anticodon (5'-->3')	gene_copy_number	cognate codon match (5'-->3')	prop_cognatecodonuse_sbw25	predicted G:U wobble codon match (5'-->3')	predicted position 34 modification (MODOMICS: Boccaletto et al., 2017: https://doi.org/10.1093/nar/gkx1030; tRNAmodpred: Machnicka et al., 2016: https://doi.org/10.1016/j.ymeth.2016.03.013; tRNAmod Panwar and Raghava, 2014: https://doi.org/10.1186/1471-2105-15-326)	predicted modification enzymes (predictions and pflu annotation numbers based on genome sequence from Silby et al., 2009; https://doi.org/10.1186/gb-2009-10-5-r51)	predicted translational capacity of mature tRNA	sum_cognatewobble_codonprops	translation_stage	type_in_SBW25	Notes
Ala	GGC	2	GCC	0.0545	GCU			GCC, GCU	0.0636	elongator	essential
Ala	UGC	5	GCA	0.0105		U:cmo5U	CmoA (pflu1067)/CmoB (pflu1066)	GCA, GCU, GCG	0.0548	elongator	essential	Each of the five copies is associated with an rrn cistron
Arg	UCU	1	AGA	0.0009		U:mnm5U	YfcK (pflu4318)	AGA, AGG	0.0024	elongator	essential
Arg	ACG	2	CGU	0.0132		A:I	TadA (pflu1065)	CGU, CGC, CGA	1.0476	elongator	essential	"A" in the anticodon becomes hypoxanthine, which base pairs with A, C, U (rendering GCG and UCG anticodons non-essential, and, here, absent)
Arg	CCG	1	CGG	0.0086				CGG	0.0086	elongator	essential	rendered essential by absence of tRNA-Arg(CGA), which is itself not required due to presence of tRNA-Arg(ICG)
Asn	GUU	2	AAC	0.0237	AAU	G:QtRNA	Tgt (pflu5077)/QueA (pflu5078)/QueG (no homolog identified in SBW25)	AAC, AAU	0.0313	elongator	essential	tRNA gene copies not identical in primary sequence (6 differences)
Asp	GUC	4	GAC	0.036	GAU	G:gluQtRNA	GluQRS (pflu5234)	GAC, GAU	0.0531	elongator	essential
Cys	GCA	1	UGC	0.0077	UGU			UGC, UGU	0.0087	elongator	essential	GtRNAdb 2.0 lists two cysGCA gene copies in SBW25; one of these is unlikely to function during translation (no reads detected in any SBW25 strains in any YAMAT-seq runs, and tRNA-characteristic cloverleaf secondary structure not conserved).
fMet	CAU	3	AUG	n/a				iCAU	n/a	initiator	essential	Two of three gene copies are identical, the third has differences along the primary sequence
Gln	UUG	1	CAA	0.0149		U:cmnm5s2U	TrmU (pflu3811)/TrmE (pflu6133)/GidA (pflu6129)	CAA, CAG	0.0455	elongator	essential
Glu	UUC	4	GAA	0.0299		U:mnm5s2U	YfcK (pflu4318)	GAA, GAG	0.0543	elongator	essential
Gly	GCC	3	GGC	0.0495	GGU			GGC, GGU	0.065	elongator	essential
Gly	UCC	1	GGA	0.0028		U:mnm5U	YfcK (pflu4318)	GGA, GGG	0.0138	elongator	essential
His	GUG	2	CAC	0.0151	CAU	G:QtRNA	Tgt (pflu5077)/QueA (pflu5078)/QueG (no homolog identified in SBW25)	CAC, CAU	0.023	elongator	essential
Ile	GAU	5	AUC	0.0365	AUU			AUC, AUU	0.0469	elongator	essential	Each of the five copies is associated with an rrn cistron
Ile	LAU	1	AUA	0.0016		C:k2C	TilS (pflu1287)	AUA	0.0016	elongator	essential	ileCAT gene where first anticodon base (C) is post-transcriptionally altered to Lysidine (L), which base pairs with A
Leu	GAG	1	CUC	0.0174	CUU			CUC, CUU	0.0227	elongator	essential
Leu	UAG	1	CUA	0.0019	CUG			CUA, (CUG)	0.0692	elongator	essential
Leu	UAA	1	UUA	0.0021	UUG	U:cmnm5Um	TramL (pflu0341)/TrmE (pflu6133)/GidA (pflu6129)	UUA, UUG	0.0251	elongator	essential
Lys	UUU	2	AAA	0.0134		U:mnm5s2U	YfcK (pflu4318)	AAA, AAG	0.0358	elongator	essential
Met	CAU	1	AUG	0.0226				AUG	0.0226	elongator	essential	Note: codon proportion includes both Met and fMet codons as per GtRNAdb (Lowe and Chan, 2016)
Phe	GAA	1	UUC	0.0257	UUU			UUC, UUU	0.0366	elongator	essential
Pro	GGG	1	CCC	0.012	CCU			CCC, CCU	0.0172	elongator	essential
Pro	UGG	2	CCA	0.0052	CCG			CCA, CCG	0.0314	elongator	essential
Ser	GGA	1	UCC	0.0113	UCU			UCC, UCU	0.0133	elongator	essential
Ser	UGA	1	UCA	0.0029		U:cmo5U	CmoA (pflu1067)/CmoB (pflu1066)	UCA, UCU, UCG	0.018	elongator	essential
Ser	GCU	1	AGC	0.0233	AGU			AGC, AGU	0.029	elongator	essential
Thr	GGU	1	ACC	0.0329	ACU			ACC, ACU	0.0369	elongator	essential
Thr	UGU	1	ACA	0.003	ACG			ACA, ACG	0.014	elongator	essential
Trp	CCA	1	UGG	0.0144				UGG	0.0144	elongator	essential
Tyr	GUA	1	UAC	0.0181	UAU	G:QtRNA	Tgt (pflu5077)/QueA (pflu5078)/QueG (no homolog identified in SBW25)	UAC, UAU	0.0251	elongator	essential
Val	GAC	1	GUC	0.0205	GUU			GUC, GUU	0.0264	elongator	essential
Val	UAC	3	GUA	0.0057	GUG	U:cmo5U	CmoA (pflu1067)/CmoB (pflu1066)	GUA, GUU, GUG	0.046	elongator	essential
Arg	CCU	1	AGG	0.0015				AGG	0.0015	elongator	non-essential	Alpha tRNA predicted to functionally compensate: tRNA-Arg(UCU), encoded by single copy argTCT
Gly	CCC	1	GGG	0.011				GGG	0.011	elongator	non-essential	Alpha tRNA predicted to functionally compensate: tRNA-Gly(UCC), encoded by single copy glyTCC
Leu	CAG	2	CUG	0.0673				CUG	0.0673	elongator	non-essential	Alpha tRNA predicted to functionally compensate: tRNA-Leu(UAG), encoded by single copy leuTAG
Leu	CAA	1	UUG	0.023		C:Cm	RlmM (pflu1543)/RsmI (pflu0937)/YfhQ (pflu5071)/TrmL (pflu0341)	UUG	0.023	elongator	non-essential	Alpha tRNA predicted to functionally compensate: tRNA-Leu(UAA), encoded by single copy leuTAA
Ser	CGA	1	UCG	0.0131				UCG	0.0131	elongator	non-essential	Alpha tRNA predicted to functionally compensate: tRNA-Ser(UGA), encoded by single copy serTGA
Thr	CGU	1	ACG	0.011				ACG	0.011	elongator	non-essential	Alpha tRNA predicted to functionally compensate: tRNA-Thr(UGU), encoded by single copy thrTGT
Ala	AGC	0	GCU	0.0091	n/a	n/a				n/a	absent
Ala	CGC	0	GCG	0.0352	n/a	n/a				n/a	absent
Arg	GCG	0	CGC	0.0344	n/a	n/a				n/a	absent	rendered non-essential by tRNA-Arg(ICG), encoded by argACG
Arg	UCG	0	CGA	0.0028	n/a	n/a				n/a	absent	rendered non-essential by tRNA-Arg(ICG), encoded by argACG
Asn	AUU	0	AAU	0.0076	n/a	n/a				n/a	absent
Asp	AUC	0	GAU	0.0171	n/a	n/a				n/a	absent
Cys	ACA	0	UGU	0.001	n/a	n/a				n/a	absent
Gln	CUG	0	CAG	0.0306	n/a	n/a				n/a	absent
Glu	CUC	0	GAG	0.0244	n/a	n/a				n/a	absent
Gly	ACC	0	GGU	0.0155	n/a	n/a				n/a	absent
His	AUG	0	CAU	0.0079	n/a	n/a				n/a	absent
Ile	AAU	0	AUU	0.0104	n/a	n/a				n/a	absent
Leu	AAG	0	CUU	0.0053	n/a	n/a				n/a	absent
Lys	CUU	0	AAG	0.0224	n/a	n/a				n/a	absent
Phe	AAA	0	UUU	0.0109	n/a	n/a				n/a	absent
Pro	AGG	0	CCU	0.0052	n/a	n/a				n/a	absent
Pro	CGG	0	CCG	0.0262	n/a	n/a				n/a	absent
Ser	AGA	0	UCU	0.002	n/a	n/a				n/a	absent
Ser	ACU	0	AGU	0.0057	n/a	n/a				n/a	absent
Thr	AGU	0	ACU	0.004	n/a	n/a				n/a	absent
Tyr	AUA	0	UAU	0.007	n/a	n/a				n/a	absent
Val	AAC	0	GUU	0.0059	n/a	n/a				n/a	absent
Val	CAC	0	GUG	0.0403	n/a	n/a				n/a	absent
