# Supplementary material for: The birth of a bacterial tRNA gene by large-scale, tandem duplication events
Source: eLife. 2020 Oct 30;9:e57947. doi: 10.7554/eLife.57947 (PMC7661048; doi:10.7554/eLife.57947)
Supplement: Supplementary file 2. [file elife-57947-supp2.xlsx]

## Sheet: Sheet1
Strains, plasmids, oligonucleotides, and duplication junction sequences used in this study.
Strains used in this study
Name	Description	Reference	Notes
SBW25	Original, wild type strain isolated from the leaf of a sugar beet plant in Oxford, UK. Founding genotype of evolution Lines W1 and W2. White colonies on media containing X-gal.	(Rainey & Bailey, 1996)	https://doi.org/10.1046/j.1365-2958.1996.391926.x
SBW25-lacZ	SBW25 containing a neutral, chromosomal lacZ marker (blue colonies on media containing X-gal); competitor genotype in fitness experiments.	(Zhang & Rainey, 2007a)	https://doi.org/10.1016/j.mimet.2007.07.001
SBW25-eWT	Engineered wild type: a strain that has been through the entire two-step allelic exchange protocol, but retains the serCGA gene. A control for effects of the construction process. Obtained from a separate round of allelic exchange to DserCGA-1 and DserCGA-2. Founding genotype of evolution Lines W3 and W4.	This study	Isolated during the two-step allelic exchange procedure for deleting serCGA, as broadly outlined in Zhang and Rainey, 2007b (https://doi.org/10.1534/genetics.107.075713 ). Modifications to protocol: growth of transconjugants during step 2 was performed in 1L flasks containing 200 ml M9 (as opposed to KB, to lessen the growth disadvanatge experienced by deletion mutants). SBW25-eWT was isolated af…
DserCGA-1	SBW25 in which 136 bp, including the 90 bp serCGA gene, have been removed from the chromosome by two-step allelic exchange. First independent construction. Founding genotype of evolution Lines M1, M2.	This study	Biological replicate of delserCGA-2 below. Constructed by two-step allelic exchange, as broadly outlined in Zhang and Rainey, 2007b (https://doi.org/10.1534/genetics.107.075713 ). Modifications to protocol: growth of transconjugants during step 2 was performed in 1L flasks containing 200 ml M9 (as opposed to KB, to lessen the growth disadvanatge experienced by deletion mutants). delserCGA-1 was i…
DserCGA-2	SBW25 in which 136 bp, including the 90 bp serCGA gene, have been removed from the chromosome by two-step allelic exchange. Second independent construction. Founding genotype of evolution Lines M3, M4.	This study	Biological replicate of delserCGA-1 above. Constructed by two-step allelic exchange, as broadly outlined in Zhang and Rainey, 2007b (https://doi.org/10.1534/genetics.107.075713 ). Modifications to protocol: growth of transconjugants during step 2 was performed in 1L flasks containing 200 ml M9 (as opposed to KB, to lessen the growth disadvanatge experienced by deletion mutants). delserCGA-2 was i…
W1-L	Purified isolate from the Day 13 population of evolution lineage W1 (descendent of SBW25). Genome sequenced.	This study
W3-L	Purified isolate from the Day 13 population of evolution lineage W3 (descendent of SBW25-eWT). Genome sequenced.	This study
M1-L	Purified isolate from the Day 13 population of evolution lineage M1 (descendent of DserCGA-1). Genome sequenced.	This study
M2-L	Purified isolate from the Day 13 population of evolution lineage M2 (descendent of DserCGA-1). Genome sequenced.	This study
M2-Lop	Purified isolate from the Day 13 population of evolution lineage M2 (descendent of DserCGA-1). Produces mixture of opaque and standard colonies. Genome sequenced.	This study
M3-L	Purified isolate from the Day 13 population of evolution lineage M3 (descendent of DserCGA-2). Genome sequenced.	This study
M4-L	Purified isolate from the Day 13 population of evolution lineage M4 (descendent of DserCGA-2). Genome sequenced.	This study
SBW25+pSXn	SBW25 wild type carrying the empty pSXn vector. GmR. Control for effect of pSXn vector on SBW25 phenotype.	This study
SBW25+pSXn-serCGA	SBW25 wild type carrying the pSXn vector with the serCGA gene directionally ligated into the NdeI and BamHI sites. GmR.	This study
SBW25+pSXn-serTGA	SBW25 wild type carrying the pSXn vector with the serTGA gene directionally ligated into the NdeI and BamHI sites. GmR.	This study
DserCGA1+pSXn	tRNA deletion strain DserCGA-1 carrying the empty pSXn vector. GmR. Control for effect of pSXn vector on phenotype.	This study
DserCGA1+pSXn-serCGA	tRNA deletion strain DserCGA-1 carrying the pSXn vector with the serCGA gene directionally ligated into the NdeI and BamHI sites. GmR	This study
DserCGA1+pSXn-serTGA	tRNA deletion strain DserCGA-1 carrying the pSXn vector with the serTGA gene directionally ligated into the NdeI and BamHI sites. GmR	This study
DserCGA2+pSXn	tRNA deletion strain DserCGA-2 carrying the empty pSXn vector. GmR Control for effect of pSXn vector on phenotype.	This study
DserCGA2+pSXn-serCGA	tRNA deletion strain DserCGA-2 carrying the pSXn vector with the serCGA gene directionally ligated into NdeI/BamHI sites. GmR	This study
DserCGA2+pSXn-serTGA	tRNA deletion strain DserCGA-2 carrying the pSXn vector with the serTGA gene directionally ligated into the NdeI and BamHI sites. GmR	This study
E. coli DH5a-lpir	supE44, ∆lacU169, hsdR17, recA1, endA1, gyrA96, thi- 1, relA1, λpir	Life Technologies
E. coli S171-lpir	(F−) RP4-2-Tc::Mu aphA::Tn7recAλpirlysogen; KmR	(Simon et al., 1983)	https://doi.org/10.1038/nbt1183-784
Plasmids used in this study
Name	Description	Reference	Notes
pCR8/GW/TOPO	SpeR, Puc ori; 2.8 kb plasmid used for Sanger sequencing of PCR products	Life Technologies
pUIC3	TcR, mob, oriR6K, bla, Δpromoter-lacZY; 11 kb plasmid used for two-step allelic exchange in SBW25	(Rainey, 1999)	https://doi.org/10.1046/j.1462-2920.1999.00040.x
pSXn	A derivative of pSX (GenBank accession number JN703735.1) carrying lacIQ and IPTG-inducible tac promoter, GmR, AmpR. Modified from pSX by deletion of one of two copies of a 38-bp repeat (5'‑TTTGTTTATTTTTCTAAATACATTCAAATATGTATCCG-3'). This was to prevent loss of (deleterious) inserts by recombination around the MCS. Note that IPTG was not used in our growth media at any point; leaky expression fro…	Bertels, (Owen & Ackerley 2011)	The original pSX plasmid was obtained from Prof. David Ackerley (Victoria University Wellington; New Zealand) and is described in (Owen & Ackerley, 2011: https://doi.org/10.1186/1471-2180-11-218). The modified pSX plasmid (pSXn) is from Dr Frederic Bertels (Max Planck Institute; Ploen, Germany).
Oligonucleotides used in this study
Name	Sequence (5’ --> 3’)	Purpose	Source	Notes
serCGA_1	gaagatctGAGTGCCTGGTCAAGAAGCTC	serCGA deletion fragment construction	This study	BglII restriction site underlined
serCGA_2	GCATCATAACAGCGTGGATCAGG	serCGA deletion fragment construction	This study
serCGA_3	cctgatccacgctgttatgatgcGTCACATAAAGCGTTTGTACCAGC	serCGA deletion fragment construction	This study
serCGA_4	gaagatctGTAGAAAGCGGCGTCATCAGG	serCGA deletion fragment construction	This study	BglII restriction site underlined
serCGA_f	gaagatctCAAGCGCATCGAACAACTTGATC	External checking primers for serCGA deletion construction	This study	BglII restriction site underlined
serCGA_r	gaagatctGATGTGGCTCTGACTCATTAGGAAG	External checking primers for serCGA deletion construction	This study	BglII restriction site underlined
serCGA_exp_f	Gaattccatatgggagagatgccagagtggc	Over expression insert amplification for serCGA	This study	NdeI restriction site underlined
serCGA_exp_r	gatggatccTGGCGGAGAGATAGGGATTCG	Over expression insert amplification for serCGA	This study	BamHI restriction site underlined
serTGA_exp_f	Gaattccatatggggaaattggcagagtggttg	Over expression insert amplification for serTGA	This study	NdeI restriction site underlined
serTGA_exp_r	gatggatccTGGCGGGAAACCAGGGATTC	Over expression insert amplification for serTGA	This study	BamHI restriction site underlined
junct_f1	GTAGCACCGCCGTAGTTGAC	Checking emergent junction in M1-L	This study
junct_r1	CTGGCTCGGACACTGTTGTG	Checking emergent junction in M1-L, M2-L, M3-L	This study
junct_f2	gttgaggatcaggtgagcgatg	Checking emergent junction in M2-L, M3-L	This study
junct_f3	GATGTCGGTGGAAGGCTTCAAG	Checking emergent junction in M2-Lop	This study
junct_r3	CACCATCAACTTTACTGTGCTCAAGG	Checking emergent junction in M2-Lop	This study
junct_f4	CTAACGCTACTTGTGCCAAAGCTG	Checking emergent junction in M4-L	This study
junct_r4	CACGATTCGACCGCTCCTTG	Checking emergent junction in M4-L	This study
GW1	GTTGCAACAAATTGATGAGCAATGC	pCR8/GW/TOPO MCS	Life Technologies
GW2	GTTGCAACAAATTGATGAGCAATTA	pCR8/GW/TOPO MCS	Life Technologies
pSXn_MCS_f	GTCGTAAATCACTGCATAATTCGTGTCG	pSXn MCS	This study
pSXn_MCS_r	CGTTTCACTTCTGAGTTCGGCATG	pSXn MCS	This study
Junction sequences determined by a combination of NGS, PCR and Sanger sequencing in this study
Junction name (strain present in)	Duplication junction sequence (5’ --> 3’)	Notes	(Fold coverage of duplication region)/(fold coverage of remainder of genome) (3sf)
M1junct1 (M1-L)	CCCGACGGATGCTGCAgtTGGATCGCGGCCTAACAGTTAGA	g=last duplicated base of murB, t=first duplicated base of IG repeat (repeated elsewhere in the chromosome: 4,119,923-4,119,446 is the relevant region)	1.86
M2junct1 (M2-L)	TGGTCGTCTGCCAGCCCGCCAgcgggagcaagctccctcgccacaggtccagcgccataGCCAGAATTGTGTAGATGCCC	small letters=shared between first and second side of junction. Capital letters at 5' end = R200 (present elsewhere in the chromosome: 4,311,009-4,311,029 is the relevant region). Capital letters at the 3' end = R0 (present elswhere in the chromosome: 4,119,273-4,119,293 is the relevant region)	1.8
M2junct2 (M2-Lop)	GGTAACGCGGCACTttATGAATATTCCCCC	first t=last duplicated base of nuoL, second t=first duplicated base of pflu3649	1.79
M3junct1 (M3-L)	unknown	undefined, but NGS and PCRs combined reveal similar duplicated region to M2-L	not calculated due to exact duplication region being unknown
M4junct1 (M4-L)	GTGCCCGACAAGTGcaAAACTGGAAATATC	c=last duplicated base in the intergenic region upstream of tRNA quad, a=first duplicated base of pflu3655	1.76
