# Supplementary material for: The birth of a bacterial tRNA gene by large-scale, tandem duplication events
Source: eLife. 2020 Oct 30;9:e57947. doi: 10.7554/eLife.57947 (PMC7661048; doi:10.7554/eLife.57947)
Supplement: Supplementary file 3. — Whole genome sequence data (Illumina NextSeq, 150 bp, paired-end reads; SRA accession number: PRJNA558233) were obtained for seven strains from day 13 of the evolution experiment: W1-L, W3-L (each derived from two independent SBW25 control lineages), M1-L, M2-L, M2-Lop, M3-L, and M4-L (each derived from four independent serCGA deletion lineages). A minimum of 4.5 million raw reads was obtained for each sample, and these were aligned to the P. fluorescens SBW25 genome sequence (Silby et al., 2009) and subsequently analysed using a combination of breseq (Barrick et al., 2014) and Geneious. This file provides a summary and a full report of the mutations predicted in each isolate. In addition to the large tandem duplications detailed in Table 1, two unique point mutations were identified: W3-L carries a non-synonymous point mutation in ytfH (encoding a probable transcriptional regulator), and M2-L carries a synonymous point mutation in edd (encoding phosphogluconate dehydratase). There is evidence for some non-ubiquitous deletions in repetitive, intergenic, DNA elements in M1-L, M2-L, M2-Lop, and M4-L. These deletions affect areas outside of the large duplication regions. Some putative mutations were identified in all (or most) isolates, many of which have also been identified in unrelated experiments (i.e., are likely to be present in the starting strain; Gallie et al., 2015, Gallie et al., 2019). As such, these putative mutations are not expected to be relevant for the fitness effects described in this manuscript. [file elife-57947-supp3.xlsx]

## Sheet: summary
Summary Table listing unique mutations identified in each of seven isolates from Day 13 of the evolution experiment. For a full list of putative differences from the published SBW25 sequence identified in each isolate, see other tabs. Whole genome sequence data (Illumina NextSeq, 150 bp, paired-end reads; SRA accession number: PRJNA558233) were obtained for seven strains from Day 13 of the evolut…
junction_unique_sites: the new junction created by a duplication; one base either side of the junction is underlined; upstream and downstream bases are provided to identify the genomic region uniquely (in cases where there are DNA repeats, this can be long)
strain	founder of Line	mutation_class	position	mutation_details	evidence	junction_uniquesides
W1-L	SBW25 (wild type)	n/a	n/a	no mutations detected	breseq/Geneious	n/a
W3-L	SBW25-eWT	non-synonymous point mutation	3325791	codon gCc --> gTc, causing amino acid change A326V in ytfH, a conserved hypothetical protein with a Pfam-identified HxlR-like H-T-H domain.	breseq/Geneious	n/a
M1-L	delserCGA-1	large tandem duplication	4119923 (start) to 4164966 (end)	~45 kb duplication containing 45 genes including serTGA	breseq/Geneious/lab work	CCCGACGGATGCTGCAGTTGGATCGCGGCCTAACAGTTAGATGGTGGTCGGCTGTCAGGCAGCCGGCGGGAGCAAGCTCCCTCGCCACAGGTCCCGCGCTATAGCCAGAATTGTGTAGATACCGATGCCCGATGGCGCTGAATCAGTCACCTGATGAATCGACTGACACACCGCTATCGGGGGCAAGCCCCCTCCCACATTTGC
M2-L	delserCGA-1	large tandem duplication	4119235-4119352 (start) to 4310940-4311029 (end)	~192 kb duplication containing 186 protein coding genes and serTGA	breseq/Geneious/lab work	TACCTAAATAACGGATATGTACCCGGTCTGATCCAACATCCTGGTCGTCTGCCAGCCCGCCAGCGGGAGCAAGCTCCCTCGCCACAGGTCCAGCGCCATAGCCAGAATTGTGTAGATGCCCAAGCCCCGATGGCGCTGAATCAGTCACCTGATGAATCG
		synonymous point mutation	5448242	Point mutation (synonymous, affecting codon number 17, encoding R) in edd (phosphogluconate dehydratase)	breseq/Geneious	n/a
M2-Lop	delserCGA-1	large tandem duplication	4042455 (start) to 4224306 (end)	~183 kb duplication containing 179 genes including serTGA	breseq/Geneious/lab work	GGTAACGCGGCACTTTATGAATATTCCCCC
M3-L	delserCGA-2	large tandem duplication	approx. 4119100 (start) to approx. 4310800 (end)	~192 kb duplication containing >179 genes including serTGA	breseq/Geneious/lab work	unknown
M4-L	delserCGA-2	large tandem duplication	4048979 (start) to 4339314 (end)	~290 kb duplication containing 279 genes including serTGA and four other tRNA genes	breseq/Geneious/lab work	GTGCCCGACAAGTGCAAAACTGGAAATATC
Note that the 136-bp serCGA deletion was also identified in each of the five isolates from the mutant lineages (M1-L, M2-L, M2-Lop, M3-L and M4-L)

## Sheet: W1-L
Mutations called in an isolate from Day 13 of Line W1, W1-L (founded by SBW25 wild type)
Summary: no changes were found by either breseq or Geneious that are unique to this isolate. Five putative changes were identified; none of these is predicted to be real for three reasons: (i) most occur at considerably less than 100% frequency, meaning that some wild type reads exist across the regions, (ii) most occur in repetitive, intergenic regions that are notoriously difficult to sequence …
breseq: R1 gave 2,746,590 reads; R2 gave 2,742,351 reads with 99.3% and 98.8% mapped, respectively. Fit mean = 120.7
number	start	finish	locus	type	nt_change	prot_change	evidence_type	frequency	notes
1	360367	360497	intergenic	deletion	(-130bp)		unassigned new junction	0.545	possible deletion of R2 repeat (intergenic); mutation called by breseq in 7 out of 7 isolates
2	985333		intergenic	insertion	(+c)		RA	0.925	possible addition of a c at the 5' end of an intergenic IR8 repeat; also called by breseq in 6 out 7 isolates (not called in M4-L)
3	3447984		intergenic	deletion	(-cc)		RA	0.974	possible change in a c tract (intergenic; ccccc-->ccc); called by both breseq and Geneious in 7 out of 7 isolates
4	5717306	5718017	16S rRNA	low coverage	unknown		unassigned missing coverage		low coverage assignment in copy 4 (of 5 exact copies across genome) of 16S rRNA; similar mutation called by breseq in 5 out of 7 isolates (not called in M2-Lop or M4-L)
5	6223020		intergenic	deletion	(-132bp)		JC	n/a	possible deletion of R2 repeat (intergenic), called by breseq in 7 out of 7 lineages
Geneious (v11.1.4): 5,411,436 reads (R1 and R2 paired) mapped to SBW25 genome; lower detection limit set to 0.9
number	start	finish	locus	type	nt_change	prot_change	evidence_type	frequency	notes
3	3447984		intergenic	deletion	(-cc)			0.963	possible change in a C tract (intergenic; CCCCC-->CCC); called by both breseq and Geneious in 7 out of 7 isolates

## Sheet: W3-L
Mutations called in an isolate from Day 13 of Line W3, W3-L (founded by SBW25-eWT, the engineered wild type)
Summary: a non-synonymous point mutation was uniquely identified in this isolate (in ytfH, a conserved hypothetical protein with a Pfam-identified HxlR-like H-T-H domain; blue). Five other putative changes were identified. None of these is predicted to be real for three reasons: (i) most occur at considerably less than 100% frequency, meaning that some wild type reads exist across the regions, (i…
breseq: R1 gave 2,555,638 reads; R2 gave 2,551,681 reads with 98.8% and 98.4% mapped, respectively. Fit mean = 112.0
number	start	finish	locus	type	nt_change	prot_change	evidence_type	frequency	notes
1	360367	360497	intergenic	deletion	(-130bp)		unassigned new junction	0.545	possible deletion of R2 repeat (intergenic); mutation called by breseq in 7 out of 7 isolates
2	985333		intergenic	insertion	(+c)		RA	0.889	possible addition of a c at the 5' end of an intergenic IR8 repeat; also called by breseq in 6 out 7 isolates (not called in M4-L isolate)
3	3325791	3325791	ytfH (pflu3048): conserved hypothetical protein with transcriptional regulator domain	transition	gCc-->gTc	A326V	RA	0.987	probable point mutation causing amino acid substitution; also called by Geneious
4	3447984		intergenic	deletion	(-cc)		RA	0.974	possible change in a c tract (intergenic; ccccc-->ccc); called by both breseq and Geneious in 7 out of 7 isolates
5	5717306	5718017	16S rRNA	low coverage	unknown		unassigned missing coverage		low coverage assignment in copy 4 (of 5 exact copies across genome) of 16S rRNA; similar mutation called by breseq in 5 out of 7 isolates (not called in M2-Lop or M4-L isolates)
6	6223020		intergenic	deletion	(-132bp)		JC	n/a	possible deletion of R2 repeat (intergenic), called by breseq in 7 out of 7 lineages
Geneious (v11.1.4): 5,015,456 reads (R1 and R2 paired) mapped to SBW25 genome; lower detection limit set to 0.9
number	start	finish	locus	type	nt_change	prot_change	evidence_type	frequency	notes
3	3325791	3325791	ytfH (pflu3048): conserved hypothetical protein with transcriptional regulator domain	transition	gCc-->gTc	A326V		0.987	probable point mutation causing amino acid substitution (coverage is 79); also called by breseq
4	3447984		intergenic	deletion	(-cc)			0.933	possible change in a C tract (intergenic; CCCCC-->CCC); called by both breseq and Geneious in 7 out of 7 isolates

## Sheet: M1-L
Mutations called in an isolate from Day 13 of Line M1, M1-L, (founded by delserCGA-1, the first of the serCGA deletion mutants)
Summary: A likely duplication is identified by breseq (45 kb, containing serTGA gene; pink). The engineered 136 bp serCGA deletion is identified by both breseq and Geneious (grey). Several other puative mutations identified; none of these is predicted to be real for three reasons: (i) most occur at considerably less than 100% frequency, meaning that some wild type reads exist across the regions, …
breseq: R1 gave 2,351,619 reads; R2 gave 2,347,964 reads with 99.3% and 98.8% mapped, respectively. Fit mean = 102.0
number	start	finish	locus	type	nt_change	prot_change	evidence_type	frequency	notes
1	360367	360497	intergenic	deletion	(-130bp)		unassigned new junction	0.511	possible deletion of R2 repeat (intergenic); mutation called by breseq in 7 out of 7 isolates
2	985333		intergenic	insertion	(+c)		RA	0.878	possible addition of a c at the 5' end of an intergenic IR8 repeat; also called by breseq in 6 out 7 isolates (not called in M4-L)
3	1624958	1625092	intergenic	deletion	(-136bp)		MC/JC	1	the constructed deletion of serCGA as desired
4	3447984		intergenic	deletion	(-cc)		RA	0.988	possible change in a c tract (intergenic; ccccc-->ccc); called by both breseq and Geneious in 7 out of 7 isolates
5	4119923	4164966	genomic	large duplication	(+45043bp)	dosage effects	unassigned new junction	0.517	duplication of ~45 kb region, creating new junction (between murB and an R0 repeat)
6	4479628	4480096	intergenic	intergenic	(-468bp)		unassigned missing coverage		Possible deletion of R200 between pflu4049 and pflu4050; mutation called by breseq in M1-L and M4-L
7	5717306	5718017	16S rRNA	low coverage	unknown		unassigned missing coverage		low coverage assignment in copy 4 (of 5 exact copies across genome) of 16S rRNA; similar mutation called by breseq in 5 out of 7 isolates (not called in M2-Lop or M4-L)
8	6223020		intergenic	deletion	(-132bp)		JC	n/a	possible deletion of R2 repeat (intergenic), called by breseq in 7 out of 7 lineages
Geneious (v11.1.4): 4,635,388 reads (R1 and R2 paired) mapped to SBW25 genome; lower detection limit set to 0.9
number	start	finish	locus	type	nt_change	prot_change	evidence_type	frequency	notes
3	1624958	1625092	intergenic	deletion	(-136bp)			1	the constructed deletion of serCGA as desired; also called by breseq
4	3447984		intergenic	deletion	(-cc)			0.933	possible change in a C tract (intergenic; CCCCC-->CCC); called by both breseq and Geneious in 7 out of 7 isolates
5	4120052	4164754	genomic	large duplication			coverage		high coverage (outside 5 standard deviations from the mean)

## Sheet: M2-L
Mutations called in an (non-sectoring) isolate from Day 13 of Line M2, M2-L (founded by delserCGA-1, the first of the serCGA deletion mutants). Levels of colanic acid-like polymer do not appear higher than usual.
Summary: A likely duplication is identified by a combination of breseq and Geneious coverage plots (192 kb, containing serTGA gene; pink). The engineered 136 bp serCGA deletion is identified by both breseq and Geneious (grey). A second unique mutation, a synonymous point mutation in edd, was identified by both breseq and Geneious (note: absent from M2-Lop; blue). Several other putative mutations …
breseq: R1 gave 2,889,333 reads; R2 gave 2,885,143 reads with 99.2% and 98.7% mapped, respectively. Fit mean = 124.6
number	start	finish	locus	type	nt_change	prot_change	evidence_type	frequency	notes
1	360367	360497	intergenic	deletion	(-130bp)		unassigned new junction	0.583	possible deletion of R2 repeat (intergenic); mutation called by breseq in 7 out of 7 isolates
2	985333		intergenic	insertion	(+c)		RA	0.9	possible addition of a c at the 5' end of an intergenic IR8 repeat; also called by breseq in 6 out 7 isolates (not called in M4-L)
3	1624958	1625092	intergenic	deletion	(-136bp)		MC/JC	1	the constructed deletion of serCGA as desired
4	4310940	4119235	genomic	large duplication	(+192000bp)		unassigned new junction	n/a	Note: the "start" called by breseq is in the wrong region - closer insepction revelas it should be around 4310940 downstream of pflu3909 (very repetitive across the genome). Duplication of ~290 kb, creating new junction (between R200s)
5	3447984		intergenic	deletion	(-cc)		RA	0.975	possible change in a c tract (intergenic; ccccc-->ccc); called by both breseq and Geneious in 7 out of 7 isolates
6	4666419	4666616	intergenic	unsure	(198bp)		unassigned missing coverage		low coverage region ; R2 repeat downstream of pflu4421 and yjgM
7	5448242	5448242	edd (pflu4964)	transversion	cgC-->cgA	none (synonymous)	RA	0.993	possible synonymous change in edd (phosphogluconate dehydratase)
8	5717296	5718108	23S rRNA	low coverage	unknown		unassigned missing coverage	n/a	low coverage assignment in copy 4 (of 5 exact copies across genome) of 23S rRNA; similar mutation called by breseq in 5 out of 7 isolates (not called in M2-Lop or M4-L)
9	6223020		intergenic	deletion	(-132bp)		JC	n/a	possible deletion of R2 repeat (intergenic), called by breseq in 7 out of 7 lineages
Geneious (v11.1.4): 5,691,099 reads (R1 and R2 paired) mapped to SBW25 genome; lower detection limit set to 0.9
number	start	finish	locus	type	nt_change	prot_change	evidence_type	frequency	notes
3	1624958	1625092	intergenic	deletion	(-136bp)			1	the constructed deletion of serCGA as desired; also called by breseq
5	3447984		intergenic	deletion	(-cc)			0.933	possible change in a C tract (intergenic; CCCCC-->CCC); called by both breseq and Geneious in 7 out of 7 isolates
4	4119383	4310018	genomic	large duplication			coverage		high coverage (outside 5 standard deviations from the mean)
7	5448242	5448242	edd (pflu4964)	transversion	cgC-->cgA	none (synonymous change)		0.993	possible synonymous change in edd (phosphogluconate dehydratase)

## Sheet: M2-Lop
Mutations called in a second (sectored) isolate from Day 13 of Line M2, M2-Lop (founded by delserCGA-1, the first of the serCGAdeletion mutants). High levels of colanic acid-like polymer.
Summary: A likely duplication is identified by breseq (183 kb, containing serTGA gene; pink). The engineered 136 bp serCGA deletion is identified by both breseq and Geneious (grey). Several other putative mutations were identified; none of these is predicted to be real for three reasons: (i) most occur at considerably less than 100% frequency, meaning that some wild type reads exist across the re…
breseq: R1 gave 2,675,227 reads; R2 gave 2,670,909 reads with 99.2% and 98.8% mapped, respectively. Fit mean = 115.3
number	start	finish	locus	type	nt_change	prot_change	evidence_type	frequency	notes
1	360367	360497	intergenic	deletion	(-130bp)		unassigned new junction	0.647	possible deletion of R2 repeat (intergenic); mutation called by breseq in 7 out of 7 isolates
2	985333		intergenic	insertion	(+c)		RA	0.924	possible addition of a c at the 5' end of an intergenic IR8 repeat; also called by breseq in 6 out 7 isolates (not called in M4-L isolate)
3	1624958	1625092	intergenic	deletion	(-136bp)		MC/JC	1	the constructed deletion of serCGA as desired
4	3447984		intergenic	deletion	(-cc)		RA	0.981	possible change in a c tract (intergenic; ccccc-->ccc); called by both breseq and Geneious in 7 out of 7 isolates
5	4041430	4224306	genomic	large duplication	(+182876bp)		unassigned new junction	0.468	duplication of ~183 kb, creating new junction (between nuoL and pflu3649)
6	4666419	4666616	intergenic	unsure	(198bp)		unassigned missing coverage		low coverage region ; R2 repeat downstream of pflu4421 and yjgM
7	6223020		intergenic	deletion	(-132bp)		JC	n/a	possible deletion of R2 repeat (intergenic), called by breseq in 7 out of 7 lineages
Geneious (v11.1.4): 5,270,842 reads (R1 and R2 paired) mapped to SBW25 genome; lower detection limit set to 0.9
number	start	finish	locus	type	nt_change	prot_change	evidence_type	frequency	notes
3	1624958	1625092	intergenic	deletion	(-136bp)			100%%	the constructed deletion of serCGA as desired; also called by breseq
4	3447984		intergenic	deletion	(-cc)			0.933	possible change in a C tract (intergenic; CCCCC-->CCC); called by both breseq and Geneious in 7 out of 7 isolates
5	4042455	4223681	genomic	large duplication			coverage		high coverage (outside 5 standard deviations from the mean)

## Sheet: M3-L
Mutations called in an isolate from Day 13 of Line M3, M3-L (founded by delserTGA-2, the second of the serCGA deletion mutants).
Summary: No duplication was identified by breseq; the ~192 kb duplication (containing serTGA) was identified by coverage plots in Geneious (pink row added). The engineered 136 bp serCGA deletion is identified by both breseq and Geneious (grey). Several other putative mutations were identified; none of these is predicted to be real for three reasons: (i) most occur at considerably less than 100% f…
breseq: R1 gave 2,680,215 reads; R2 gave 2,676,299 reads with 99.2% and 98.8% mapped, respectively. Fit mean = 115.3
number	start	finish	locus	type	nt_change	prot_change	evidence_type	frequency	notes
1	360367	360497	intergenic	deletion	(-130bp)		unassigned new junction	0.583	possible deletion of R2 repeat (intergenic); mutation called by breseq in 7 out of 7 isolates
2	985333		intergenic	insertion	(+c)		RA	0.939	possible addition of a c at the 5' end of an intergenic IR8 repeat; also called by breseq in 6 out 7 isolates (not called in M4-L)
3	1624958	1625092	intergenic	deletion	(-136bp)		MC/JC	1	the constructed deletion of serCGA as desired
4	3447984		intergenic	deletion	(-cc)		RA	1	possible change in a C tract (intergenic; CCCCC-->CCC); called by both breseq and Geneious in 7 out of 7 isolates
5	5717306	5718108	23S rRNA	low coverage	unknown		unassigned missing coverage	n/a	low coverage assignment in copy 4 (of 5 exact copies across genome) of 23S rRNA; similar mutation called by breseq in 5 out of 7 isolates (not called in M2-Lop or M4-L)
6	6223020		intergenic	deletion	(-132bp)		JC	n/a	possible deletion of R2 repeat (intergenic), called by breseq in 7 out of 7 lineages
Geneious (v11.1.4): 5,282,471 reads (R1 and R2 paired) mapped to SBW25 genome; lower detection limit set to 0.9
number	start	finish	locus	type	nt_change	prot_change	evidence_type	frequency	notes
3	1624958	1625092	intergenic	deletion	(-136bp)			1	the constructed deletion of serCGA as desired; also called by breseq
4	3447984		intergenic	deletion	(-cc)			0.933	possible change in a C tract (intergenic; CCCCC-->CCC); called by both breseq and Geneious in 7 out of 7 isolates
7	4119199	4311080	genomic	large duplication			coverage		high coverage (outside 5 standard deviations from the mean); large (~192 kb) duplication containing serTGA

## Sheet: M4-L
Mutations called in an isolate from Day 13 of Line M4, M4-L (founded by delserTGA-2, the second of the serCGA deletion mutants).
Summary: A likely duplication is identified by breseq (290 kb, containing serTGA; pink). The engineered 136 bp serCGA deletion is identified by both breseq and Geneious (grey). Several other putative mutations were identified; none of these is predicted to be real for three reasons: (i) most occur at considerably less than 100% frequency, meaning that some wild type reads exist across the regions…
breseq: R1 gave 2,238,353 reads; R2 gave 2,235,170 reads with 99.2% and 98.8% mapped, respectively. Fit mean = 94.7
number	start	finish	locus	type	nt_change	prot_change	evidence_type	frequency	notes
1	360367	360497	intergenic	deletion	(-130bp)		unassigned new junction	0.526	possible deletion of R2 repeat (intergenic); mutation called by breseq in 7 out of 7 isolates
2	1624958	1625092	intergenic	deletion	(-136bp)		MC/JC	1	the constructed deletion of serCGA as desired
3	3447984		intergenic	deletion	(-cc)		RA	0.976	possible change in a C tract (intergenic; CCCCC-->CCC); called by both breseq and Geneious in 7 out of 7 isolates
4	4048965	4339314	pflu3655	intergenic	(+290,348bp)		unassigned new junction	0.563	duplication of ~290 kb, creating a new junction (in colanic acid gene pflu3655 and likely promoter of tRNA gene quad)
5	4479685	4480096	intergenic	low coverage	(-412bp)		unassigned missing coverage	n/a	Possible deletion of R200 between pflu4049 and pflu4050; mutation called by breseq in M1-L and M4-L
6	6223020		intergenic	deletion	(-132bp)		JC	n/a	possible deletion of R2 repeat (intergenic), called by breseq in 7 out of 7 lineages
Geneious (v11.1.4): 5,282,471 reads (R1 and R2 paired) mapped to SBW25 genome; lower detection limit set to 0.9
number	start	finish	locus	type	nt_change	prot_change	evidence_type	frequency	notes
2	1624958	1625092	intergenic	deletion	(-136bp)			1	the constructed deletion of serCGA as desired; also called by breseq
3	3447984		intergenic	deletion	(-cc)			98.7-100%	possible change in a C tract (intergenic; CCCCC-->CCC); called by both breseq and Geneious in 7 out of 7 isolates
4	4052059	4339187	genomic	large duplication			coverage		high coverage (outside 5 standard deviations from the mean); large (~290 kb) duplication containing the serTGA gene
