# Supplementary material for: The birth of a bacterial tRNA gene by large-scale, tandem duplication events
Source: eLife. 2020 Oct 30;9:e57947. doi: 10.7554/eLife.57947 (PMC7661048; doi:10.7554/eLife.57947)
Supplement: Supplementary file 4. — The spreadsheet lists the SBW25 gene annotations from NCBI (6176 genes; left of the spreadsheet), followed by the details of which genes are duplicated in M1-L, M2-L, M2-Lop, M3-L, and M4-L. Note that for comparison purposes, the duplication details for each strain are provided on the same line numbers as the SBW25 list (scroll down until the first duplicated genes is visible in each duplication isolate). The core set of 45 genes that is duplicated in each of the five isolates is highlighted in pink. [file elife-57947-supp4.xlsx]

## Sheet: duplicated_gene_lists
List of genes in each duplication fragment. The spreadsheet lists the SBW25 gene annotations from NCBI (6176 genes; left of the spreadsheet), followed by the details of which genes are duplicated in M1-L, M2-L, M2-Lop, M3-L and M4-L. Note that for comparison purposes, the duplication details for each strain are provided on the same line numbers as the SBW25 list (scroll down until the first dupli…
Full gene annotation list for SBW25 (WT)						Fully duplicated genes in M1-L (45 genes, incl. 1 tRNA) - scroll down!							Fully duplicated genes in M2-L (187 genes, incl. 1 tRNA) - scroll down!							Fully duplicated genes in M2-Lop (179 genes, incl. 1 tRNA) - scroll down!							Fully duplicated genes in M3-L (187 genes, incl. 1 tRNA) - scroll down!							Fully duplicated genes in M4-L (279 genes, incl. 5 tRNAs)
																											Note: the duplication is not fully defined and may include one or two more genes upstream and/or downstream
name	start	end	length(bp)	direction	notes	name	start	end	length(bp)	direction	type	notes	name	start	end	length(bp)	direction	type	notes	name	start	end	length(bp)	direction	type	notes	name	start	end	length(bp)	direction	type	notes	name	start	end	length(bp)	direction	type	notes
dnaA (pflu0001)	1	1506	1506	forward
dnaN (pflu0002)	1545	2648	1104	forward
recF (pflu0003)	2669	3772	1104	forward
gyrB (pflu0004)	3777	6194	2418	forward
pflu0005	6299	7021	723	reverse
gene	7308	8240	933	forward
gene	8244	10523	2280	forward
gene	10706	11476	771	reverse
gene	11559	12092	534	reverse
glyS (pflu0010)	12098	14152	2055	reverse
glyQ (pflu0011)	14149	15102	954	reverse
gene	15184	15741	558	forward
gene	15784	16671	888	forward
gene	16806	17117	312	reverse
gene	17258	18631	1374	reverse
gene	18654	19964	1311	reverse
gene	19961	20914	954	reverse
gene	20984	21490	507	reverse
gene	21626	22417	792	forward
dprA gene	22481	23575	1095	forward
gene	23630	24187	558	forward
gene	24335	25312	978	reverse
gene	25472	26404	933	forward
gene	26404	27222	819	forward
gene	27274	28842	1569	reverse
gene	28940	29854	915	reverse
betC gene	29873	31387	1515	reverse
gene	31491	32441	951	forward
gene	32473	32802	330	forward
gene	32899	33858	960	forward
gene	33860	34480	621	forward
gene	34529	35677	1149	forward
gene	35793	37103	1311	forward
gene	37286	37726	441	reverse
gene	37863	38672	810	reverse
trpB gene	38672	39898	1227	reverse
gene	40009	40905	897	forward
gene	40917	41243	327	reverse
gene	41398	41613	216	forward
gene	41729	41956	228	forward
gene	42108	43109	1002	reverse
gene	43328	43759	432	forward
gene	43967	44206	240	forward
gene	44207	44629	423	reverse
gene	44773	45816	1044	forward
gene	45901	46560	660	reverse
gene	46557	47099	543	reverse
gene	47202	49253	2052	forward
gene	49250	49525	276	forward
gene	49599	50255	657	reverse
gene	50529	51281	753	forward
gene	51284	53068	1785	forward
gene	53081	54379	1299	forward
gene	54461	55519	1059	forward
gene	55747	56478	732	forward
gene	56564	58111	1548	forward
gene	58180	58827	648	reverse
coxB gene	59196	60323	1128	forward
ctaD gene	60382	61968	1587	forward
gene	62116	62667	552	forward
gene	62703	63590	888	forward
gene	63597	63800	204	reverse
gene	63829	64593	765	forward
gene	64559	65143	585	forward
gene	65154	66233	1080	forward
gene	66221	67120	900	forward
gene	67117	67752	636	forward
gene	67896	68666	771	reverse
gene	68717	69391	675	reverse
gene	69391	70398	1008	reverse
gene	70664	72805	2142	forward
gene	72871	73590	720	reverse
gene	73628	74416	789	reverse
gene	74409	75194	786	reverse
gene	75194	75676	483	reverse
gene	75735	76664	930	forward
gene	76789	77742	954	reverse
gene	77799	78089	291	reverse
gene	78164	80941	2778	forward
gene	81212	81874	663	reverse
gene	82046	82348	303	forward
gene	82383	83009	627	forward
gene	83178	83813	636	forward
gene	83824	84702	879	forward
gene	84699	86753	2055	forward
gene	86842	87654	813	forward
gene	87714	89501	1788	reverse
gene	89512	90858	1347	reverse
gene	91238	91522	285	forward
gene	91601	91765	165	forward
gene	91768	92235	468	forward
gene	93000	94331	1332	forward
gene	94430	95659	1230	forward
gene	95752	96363	612	reverse
gene	96360	97298	939	reverse
gene	97300	98103	804	reverse
gene	98100	99248	1149	reverse
gene	99302	100333	1032	reverse
gene	100406	101788	1383	reverse
gene	101846	103504	1659	reverse
gene	103908	104675	768	reverse
gene	104744	106051	1308	reverse
gene	106429	108390	1962	reverse
gene	108387	108707	321	reverse
gene	108746	109054	309	reverse
gene	109158	109478	321	reverse
gene	109615	109800	186	reverse
gene	110064	110279	216	reverse
gene	110598	112091	1494	reverse
gene	112271	113707	1437	reverse
gene	113707	114027	321	reverse
gene	114043	115164	1122	reverse
gene	115617	116516	900	reverse
gene	116675	117856	1182	forward
gene	117869	119089	1221	forward
gene	119288	119659	372	reverse
gene	119719	121265	1547	forward	16S rRNA
ileGAT (copy 1 of 5)	121338	121414	77	forward	predicted to encode tRNA-Ile(GAU)
alaTGC (copy 1 of 5)	121445	121520	76	forward	predicted to encode tRNA-Ala(UGC)
gene	121763	124678	2916	forward	23S rRNA
rrf gene	124819	124934	116	forward	5S rRNA
rrf gene	125044	125159	116	forward	5S rRNA
gene	125625	127505	1881	forward
gene	127545	128003	459	reverse
gene	128023	131394	3372	reverse
gene	131391	132338	948	reverse
gene	132325	133092	768	reverse
gene	133465	134163	699	reverse
gene	134475	135368	894	forward
gene	135383	136408	1026	forward
gene	136410	137261	852	forward
gene	137273	138121	849	forward
gene	138221	138847	627	forward
gene	138900	139820	921	forward
gene	140045	141580	1536	forward
gene	141596	142654	1059	forward
gene	142651	144096	1446	forward
gene	144122	144826	705	reverse
gene	144823	146991	2169	reverse
gene	147171	148775	1605	forward
gene	148809	149063	255	forward
gene	149440	149850	411	forward
gene	149847	151925	2079	forward
gene	151922	152131	210	forward
gene	152128	153018	891	forward
gene	153015	154457	1443	forward
gene	154539	155171	633	forward
gene	155318	156814	1497	forward
gene	157115	159595	2481	forward
pgaB gene	159608	161605	1998	forward
pgaC gene	161608	162948	1341	forward
pgaD gene	162951	163433	483	forward
gene	163810	165534	1725	forward
gene	165565	173760	8196	forward
gene	174227	174916	690	forward
gene	175182	176000	819	forward
gene	176471	176958	488	forward
gene	176984	177433	450	forward
gene	177524	178027	504	forward
lepB gene	178067	178855	789	forward
gene	178852	179268	417	forward
gene	179301	179774	474	forward
gene	179782	180216	435	forward
gene	180318	180905	588	reverse
gene	180922	181533	612	reverse
gene	181805	182386	582	forward
gene	182426	183106	681	forward
gene	183136	183498	363	forward
gene	183495	184145	651	forward
gene	184267	185889	1623	forward
gene	186028	186600	573	forward
gene	186597	187190	594	forward
gene	187433	187654	222	reverse
gene	189148	190404	1257	forward
gene	190401	192233	1833	forward
gene	192236	192445	210	forward
gene	192867	195041	2175	forward
gene	195411	195590	180	reverse
gene	195684	196526	843	reverse
gene	196625	199513	2889	reverse
gene	199510	199782	273	reverse
gene	199779	200063	285	reverse
gene	200593	200898	306	reverse
gene	200895	201212	318	reverse
gene	201768	203003	1236	reverse
argCCG (copy 1 of 1)	203171	203247	77	reverse	predicted to encode tRNA-Arg(CCG)
gene	203618	205060	1443	forward
gene	205246	206523	1278	forward
gene	206663	207871	1209	forward
gene	207934	208935	1002	reverse
gene	209124	210308	1185	reverse
gene	210475	212385	1911	forward
gene	212687	212869	183	forward
gene	212944	213954	1011	forward
cysT gene	214198	215016	819	forward
cysW gene	215030	215902	873	forward
gene	215906	216886	981	forward
gene	216953	217480	528	reverse
gene	217564	218250	687	forward
uraH gene	218245	218655	411	reverse
gene	218682	219155	474	reverse
gene	219256	219621	366	forward
gene	219749	220753	1005	reverse
gene	220855	221934	1080	forward
gene	221906	223516	1611	reverse
gene	223533	224348	816	reverse
gene	224345	225937	1593	reverse
gene	226226	227227	1002	forward
gene	227281	228201	921	reverse
gene	228381	229286	906	forward
gene	229387	230994	1608	reverse
gene	231095	232039	945	reverse
gene	232195	234510	2316	forward
gene	234481	235668	1188	reverse
gene	235777	236643	867	forward
gene	236868	237683	816	forward
gene	237735	238457	723	forward
gene	238459	238860	402	forward
gene	239190	239771	582	forward
gene	239821	240763	943	forward
gene	240892	241674	783	forward
gene	242102	242635	534	reverse
gene	242635	242928	294	reverse
gene	242916	243188	273	reverse
gene	243384	243950	567	forward
gene	243931	244169	239	forward
gene	244488	245178	691	forward
gene	246614	247279	666	forward
gene	247260	247919	660	forward
gene	247916	248692	777	forward
gene	248689	249543	855	forward
gene	249642	250802	1161	reverse
gene	251059	252141	1083	forward
gene	252138	253208	1071	forward
gene	253205	256270	3066	forward
gene	256515	258692	2178	forward
gene	258809	259435	627	reverse
gene	259476	260120	645	reverse
gene	260110	261225	1116	reverse
gene	261222	262037	816	reverse
gene	262119	263471	1353	reverse
gene	263471	264664	1194	reverse
gene	264689	265930	1242	reverse
gene	266118	266882	765	reverse
gene	267257	268003	747	reverse
gene	268007	268672	666	reverse
gene	268672	269466	795	reverse
gene	269746	270741	996	reverse
gene	270908	271834	927	forward
gene	272192	274192	2001	forward
gene	274398	275726	1329	forward
gene	275835	276872	1038	forward
gene	276988	277824	837	reverse
gene	277836	278672	837	reverse
tauB gene	278669	279448	780	reverse
tauA gene	279466	280443	978	reverse
gene	280713	282296	1584	reverse
gene	282511	282894	384	reverse
gene	282894	285218	2325	reverse
gene	285576	286316	741	forward
gene	286433	287746	1314	forward
gene	287817	288722	906	reverse
gene	288719	289201	483	reverse
gene	289215	289994	780	reverse
gene	290111	290518	408	forward
gene	290633	291436	804	reverse
gene	291562	292464	903	forward
gene	292644	294185	1542	forward
gene	294470	294826	357	reverse
gene	295459	296058	600	reverse
gene	296058	296228	171	reverse
gene	296405	297580	1176	forward
gene	297864	299807	1944	forward
gene	299936	300790	855	forward
gene	300852	301283	432	forward
gene	301506	301985	480	reverse
gene	302353	304701	2349	reverse
gene	304698	305537	840	reverse
gene	305635	306522	888	reverse
gene	306655	307095	441	forward
gene	307141	307803	663	reverse
gene	307891	308457	567	forward
cysQ gene	308454	309290	837	forward
gene	309357	309812	456	reverse
gene	309839	311215	1377	reverse
gene	311212	313020	1809	reverse
rfbD gene	313057	313926	870	reverse
rfbC gene	313923	314468	546	reverse
rfbA gene	314465	315340	876	reverse
rfbB gene	315337	316419	1083	reverse
gene	316571	319480	2910	forward
aguA gene	319602	320708	1107	forward
gene	320942	321157	216	forward
gene	321222	323309	2088	reverse
gene	323721	325022	1302	forward
gene	<325173	325565	>393	forward
thrTGT (copy 1 of 1)	325854	325929	76	reverse	predicted to encode tRNA-Thr(UGU)
gene	326111	326518	408	forward
yhjQ gene	327255	328289	1035	forward
gene	328286	330505	2220	forward
gene	330502	332769	2268	forward
gene	332766	333962	1197	forward
gene	333944	337783	3840	forward
gene	337800	338465	666	forward
gene	338465	339130	666	forward
gene	339148	340563	1416	forward
gene	340576	341700	1125	forward
yhjQ gene	341877	342812	936	forward
gene	343054	344241	1188	reverse
gene	344222	344911	690	reverse
gene	344911	345603	693	reverse
gene	345678	346430	753	reverse
gene	346444	347217	774	reverse
gabP gene	347772	349163	1392	forward
gene	349282	349695	414	reverse
gene	349699	350652	954	reverse
gene	350826	351791	966	forward
gene	351879	353471	1593	forward
gene	353561	353836	276	forward
gene	353986	354543	558	forward
pheGAA (copy 1 of 1)	354630	354705	76	reverse	predicted to encode tRNA-Phe(GAA)
gene	354809	355081	273	reverse
gene	355078	356145	1068	reverse
gene	356142	358352	2211	reverse
gene	358677	360338	1662	forward
gene	360640	361233	594	forward
hisH gene	361233	361871	639	forward
gene	361872	362129	258	forward
hisA gene	362169	362906	738	forward
gene	362916	363686	771	forward
gene	363753	364508	756	forward
gene	364512	366104	1593	reverse
gene	366166	366954	789	reverse
gene	366956	368272	1317	reverse
gene	368303	369598	1296	reverse
gene	369796	371322	1527	reverse
gene	371474	371887	414	forward
grxC gene	371889	372143	255	forward
gene	372183	372662	480	forward
gene	372782	373237	456	reverse
gene	373236	373676	441	forward
gene	373816	374127	312	forward
ntrC gene	374209	375645	1437	reverse
gene	375642	376727	1086	reverse
gene	377023	377448	426	reverse
gene	377526	378062	537	reverse
gene	378511	378747	237	forward
glnA gene	378824	380230	1407	reverse
gene	380282	380464	183	forward
gene	380565	382019	1455	forward
typA gene	382159	383979	1821	forward
gene	384206	384640	435	reverse
gene	384880	387330	2451	forward
gene	387490	391014	3525	forward
gene	391011	392366	1356	forward
gene	392475	393485	1011	forward
gene	393662	393916	255	forward
gene	393947	394516	570	forward
gene	394646	396010	1365	reverse
hutC gene	396119	396868	750	forward
gene	396865	397425	561	forward
hutU gene	397802	399502	1701	forward
gene	399581	401026	1446	forward
gene	401096	402061	966	forward
gene	402133	402984	852	forward
gene	402981	403805	825	forward
hutH gene	403949	405457	1509	forward
hutH gene	405504	407042	1539	forward
proY gene	407244	408653	1410	forward
gene	408669	409874	1206	forward
hutG gene	409887	410687	801	forward
pip gene	411002	411973	972	forward
gene	411970	412407	438	forward
gene	412675	414411	1737	forward
gene	414404	416974	2571	forward
gene	417160	417960	801	forward
gene	418181	418978	798	forward
gene	419016	419975	960	forward
gene	419968	420702	735	forward
gene	420896	422803	1908	reverse
gene	422931	424847	1917	reverse
gene	424955	425662	708	reverse
tatC gene	425659	426450	792	reverse
tatB gene	426447	426851	405	reverse
tatA gene	426862	427140	279	reverse
gene	427166	427498	333	reverse
hisI gene	427501	427893	393	reverse
gene	427935	429539	1605	reverse
gene	429536	430159	624	reverse
gene	430159	430929	771	reverse
gene	431074	431349	276	forward
gene	431455	431877	423	forward
gene	431890	432837	948	forward
gene	432886	433509	624	reverse
gene	433537	435219	1683	reverse
phaZ gene	435308	436153	846	reverse
gene	436299	437978	1680	reverse
gene	438228	438605	378	reverse
gene	438754	440091	1338	reverse
gene	440129	440659	531	reverse
gene	440917	441618	702	reverse
gene	441620	443356	1737	reverse
gene	443474	443665	192	forward
gene	443576	445795	2220	reverse
gene	446022	446255	234	forward
gene	446270	447076	807	forward
gene	447258	448526	1269	forward
gene	448741	451203	2463	reverse
gene	451421	452074	654	forward
gene	452071	452625	555	forward
gene	452622	453587	966	forward
gene	453657	454982	1326	forward
gene	454987	455505	519	forward
gene	455631	456731	1101	forward
gene	456741	458294	1554	forward
gene	458391	458732	342	reverse
gene	458646	463091	4446	forward
gene	463124	464542	1419	forward
gene	464786	465853	1068	forward
gene	465974	467248	1275	reverse
gene	467373	468266	894	forward
gene	468439	468882	444	reverse
gene	468909	470135	1227	reverse
gene	470135	470863	729	reverse
gene	470860	471321	462	reverse
gene	471318	472484	1167	reverse
gene	472481	472963	483	reverse
gene	472960	473709	750	reverse
gene	473706	474953	1248	reverse
gene	474987	477299	2313	reverse
gene	477289	477942	654	reverse
gene	477987	478412	426	reverse
gene	478405	479946	1542	reverse
gene	479930	480865	936	reverse
gene	480862	481596	735	reverse
gene	481746	483416	1671	reverse
gene	483413	483958	546	reverse
gene	483955	484209	255	reverse
gene	484219	484488	270	reverse
gene	484466	485278	813	reverse
gene	485254	485973	720	reverse
gene	486322	487092	771	forward
gene	487489	487710	222	forward
gene	487758	488192	435	reverse
gene	488429	488725	297	forward
gene	488722	489123	402	forward
gene	489128	490591	1464	reverse
gene	490640	494023	3384	reverse
gene	494074	495816	1743	reverse
gene	496151	497776	1626	reverse
gene	498054	498284	231	forward
gene	498281	498574	294	forward
gene	498571	500373	1803	reverse
putA gene	500578	504531	3954	reverse
putP gene	504992	506476	1485	forward
gene	506681	508705	2025	forward
gene	508715	509404	690	forward
gene	509390	510667	1278	reverse
gene	510841	511677	837	forward
gene	511838	512485	648	reverse
gene	512559	515243	2685	reverse
aceF gene	515559	517208	1650	reverse
aceE gene	517220	519865	2646	reverse
gene	520249	523188	2940	forward
waaF gene	523243	524277	1035	forward
waaC gene	524279	525340	1062	forward
gene	525340	526464	1125	forward
gene	526461	527267	807	forward
gene	527267	528001	735	forward
gene	527998	528750	753	forward
gene	528750	530201	1452	forward
gene	530588	531568	981	forward
gene	531568	>531816	>249	forward
gene	531878	532804	927	forward
gene	532811	534199	1389	reverse
gene	534275	536380	2106	reverse
gene	536553	536930	378	forward
gene	537073	538830	1758	forward
gene	538831	539727	897	forward
gene	539724	541124	1401	forward
gene	541184	542332	1149	forward
gene	542329	543210	882	forward
gene	543265	545127	1863	reverse
msbA gene	545287	547092	1806	forward
gene	547362	548786	1425	forward
gene	548779	549705	927	forward
gene	550480	551439	960	reverse
gene	551481	552293	813	reverse
gene	552290	553465	1176	reverse
gene	553521	553856	336	reverse
gene	553959	554849	891	forward
gene	554873	556150	1278	forward
gene	556273	557712	1440	reverse
gene	558161	560065	1905	forward
gene	560228	561517	1290	forward
gene	561486	562232	747	reverse
nudF gene	562426	563043	618	forward
gene	563034	563483	450	forward
gene	563582	564397	816	forward
gene	564604	565212	609	forward
parE gene	565258	567162	1905	forward
gene	567162	568157	996	forward
parC gene	568231	570495	2265	forward
gene	570669	571382	714	forward
gene	571506	573035	1530	reverse
serB gene	573169	574383	1215	forward
psd gene	574506	575366	861	reverse
gene	575383	576198	816	reverse
gene	576256	577791	1536	reverse
motA gene	577958	578809	852	forward
gene	578813	579832	1020	forward
gene	579896	580291	396	reverse
gene	580578	581609	1032	reverse
gene	581718	582260	543	forward
gene	582444	583058	615	forward
queG gene	583055	584119	1065	reverse
gene	584183	585043	861	forward
gene	585031	585501	471	forward
gene	585517	586938	1422	forward
gene	586938	588854	1917	forward
gene	588854	589825	972	forward
gene	589920	590180	261	forward
gene	590193	591494	1302	forward
hflK gene	591591	592766	1176	forward
hflC gene	592766	593632	867	forward
gene	593927	595114	1188	forward
gene	595170	596459	1290	forward
gene	596599	598533	1935	forward
gene	598642	600207	1566	reverse
gene	600207	601232	1026	reverse
leuCAG (copy 1 of 2)	601391	601477	87	reverse	predicted to encode tRNA-Leu(CAG)
leuCAG (copy 2 of 2)	601627	601713	87	reverse	predicted to encode tRNA-Leu(CAG)
rnr gene	601928	604564	2637	forward
gene	604561	605316	756	forward
gene	605625	606047	423	forward
rpsR gene	606076	606306	231	forward
gene	606343	607236	894	forward
gene	607255	607701	447	forward
gene	607812	609209	1398	forward
gene	609306	611609	2304	forward
gene	611830	612753	924	forward
gene	612746	613195	450	forward
gene	613384	616674	3291	forward
gene	616833	619319	2487	forward
gene	619319	620209	891	forward
gene	620256	620444	189	reverse
azu gene	620777	621223	447	forward
gene	621419	622246	828	reverse
pncB gene	622250	623464	1215	reverse
gene	623671	624561	891	reverse
gene	624715	626205	1491	forward
gene	626317	627600	1284	forward
gene	627975	629108	1134	forward
gene	629310	630224	915	forward
gene	630227	631504	1278	forward
gene	631501	632376	876	forward
gene	632373	633089	717	forward
gene	633295	633525	231	forward
gene	633831	634598	768	forward
gene	634661	635566	906	forward
gene	635538	636656	1119	reverse
gene	636838	637410	573	reverse
ureG gene	637433	638047	615	reverse
gene	638060	638734	675	reverse
gene	638731	639231	501	reverse
gene	639508	640005	498	forward
gene	640011	640643	633	reverse
gene	640806	641258	453	reverse
gene	641618	643687	2070	forward
gene	643821	644351	531	reverse
gene	644520	645410	891	forward
gene	645516	646391	876	reverse
gene	646489	647277	789	forward
gene	647349	647651	303	forward
gene	647881	648894	1014	forward
gene	649019	650287	1269	reverse
gene	650525	651469	945	forward
gene	651551	654778	3228	forward
gene	654775	656700	1926	forward
ureC gene	656853	658553	1701	reverse
gene	658670	658975	306	reverse
gene	658972	659505	534	reverse
gene	659511	660023	513	reverse
gene	660033	660335	303	reverse
gene	660481	661320	840	reverse
urtE gene	661351	662049	699	reverse
urtD gene	662100	662921	822	reverse
urtC gene	662930	663997	1068	reverse
urtB gene	663997	665499	1503	reverse
urtA gene	665583	666848	1266	reverse
gene	667112	671728	4617	forward
gene	671746	672756	1011	reverse
gene	672753	673700	948	reverse
gene	673697	674479	783	reverse
gene	674523	676631	2109	reverse
gene	676782	678164	1383	reverse
gene	678235	680295	2061	reverse
gene	680389	680778	390	reverse
gene	680790	681272	483	reverse
gene	681319	681714	396	reverse
gene	682283	682531	249	forward
gene	682651	683370	720	reverse
gene	683367	684572	1206	reverse
cobG gene	684611	685957	1347	forward
gene	685950	686576	627	forward
gene	686576	687307	732	forward
cobJ gene	687307	688944	1638	forward
gene	689181	689960	780	forward
gene	689957	690553	597	reverse
gene	690450	690800	351	reverse
gene	690811	693582	2772	reverse
gene	693697	694989	1293	reverse
gene	695158	696765	1608	reverse
gene	696847	697167	321	reverse
gene	697164	698177	1014	reverse
gene	698363	699595	1233	reverse
gene	699626	700504	879	reverse
accC gene	700799	702160	1362	reverse
accB gene	702178	702639	462	reverse
aroQ gene	702664	703119	456	reverse
gene	703417	705378	1962	reverse
gene	705432	707102	1671	reverse
gene	707401	708468	1068	forward
gene	708471	709007	537	forward
yciH gene	709202	709573	372	forward
speA gene	709717	711630	1914	forward
gene	711705	712598	894	forward
gene	712543	713880	1338	reverse
gene	714180	719078	4899	forward
gene	719156	719449	294	reverse
gene	719540	721870	2331	forward
gene	722017	722322	306	forward
gene	722319	723068	750	forward
gene	723093	723695	603	forward
gene	723741	724298	558	forward
gene	724512	726467	1956	forward
gene	726452	729190	2739	reverse
gene	729187	729630	444	reverse
gene	729703	730152	450	forward
gene	730279	731067	789	forward
gene	731080	731349	270	reverse
gene	731353	732093	741	reverse
gene	732104	732991	888	reverse
gene	732993	733874	882	reverse
gene	733885	735156	1272	reverse
gene	735153	736346	1194	reverse
gene	736343	737560	1218	reverse
cpaB gene	737580	738521	942	reverse
gene	738864	739055	192	forward
gene	739114	739530	417	forward
gene	739751	741433	1683	reverse
gene	741620	743104	1485	reverse
gene	743408	744256	849	reverse
gene	744259	745602	1344	reverse
gene	745717	746994	1278	forward
gene	747129	748028	900	forward
cueR gene	748174	748575	402	reverse
gene	748572	750773	2202	reverse
gene	750840	751220	381	reverse
gene	751368	751565	198	forward
gene	751651	752844	1194	forward
gene	752853	753035	183	reverse
gene	753182	754195	1014	reverse
gene	754220	754513	294	reverse
gene	754631	755557	927	forward
gene	755694	756383	690	forward
gene	756486	757439	954	reverse
gene	757634	758725	1092	forward
gene	758863	760221	1359	reverse
gene	760415	761101	687	reverse
gene	761151	761732	582	reverse
gene	761745	762404	660	reverse
gene	762492	763886	1395	reverse
gene	763975	764895	921	reverse
gene	765022	766371	1350	forward
mmsA gene	766411	767904	1494	forward
gene	768152	768390	239	reverse
gene	768531	770077	1547	forward	16S rRNA
ileGAT (copy 2 of 5)	770150	770226	77	forward	predicted to encode tRNA-Ile(GAU)
alaTGC (copy 2 of 5)	770257	770332	76	forward	predicted to encode tRNA-Ala(UGC)
gene	770575	773490	2916	forward	23S rRNA
rrf gene	773631	773746	116	forward	5S rRNA
gene	773907	774566	660	forward
gene	774553	775176	624	forward
gene	775169	777472	2304	forward
gene	777645	780485	2841	reverse
gene	780482	781189	708	reverse
gene	781179	782456	1278	reverse
gene	782644	783390	747	forward
rimI gene	783383	783835	453	forward
gene	783957	784361	405	reverse
gene	784500	785144	645	forward
gene	785141	785662	522	reverse
gene	785809	786978	1170	reverse
gene	787101	788801	1701	reverse
gene	788895	789215	321	reverse
gene	789341	790759	1419	reverse
gene	790945	792249	1305	forward
gene	792321	793457	1137	forward
gene	793454	793951	498	forward
gene	793993	795363	1371	reverse
gene	795624	796529	906	forward
gene	796678	797862	1185	forward
gene	797881	798987	1107	forward
gene	799006	802152	3147	forward
gene	802067	803503	1437	reverse
gene	803500	804174	675	reverse
gene	804520	805839	1320	reverse
gene	806063	806395	333	forward
gene	806503	807819	1317	forward
gene	807935	808744	810	reverse
gene	809019	810113	1095	forward
ggt gene	810268	812097	1830	reverse
gene	812306	816631	4326	forward
metCAT (copy 1 of 1)	816716	816792	77	reverse	predicted to encode tRNA-Met(CAU)
gene	816984	817535	552	reverse
gene	817799	>818353	>555	forward
gene	818501	818929	429	forward
gene	818866	819384	519	forward
gene	819381	820394	1014	forward
gene	820391	821044	654	forward
gene	821052	821315	264	forward
gene	821326	822114	789	forward
gene	822111	823208	1098	forward
gene	823209	823559	351	reverse
gene	823571	823774	204	reverse
gene	823771	825912	2142	reverse
gene	825927	826319	393	reverse
gene	826321	826536	216	reverse
gene	826643	827218	576	reverse
gene	827218	827799	582	reverse
gene	827789	828604	816	reverse
gene	828589	828747	159	reverse
gene	829062	829253	192	reverse
gene	829441	830358	918	reverse
ychF gene	830660	831760	1101	reverse
gene	831782	832366	585	reverse
gene	832535	833137	603	reverse
gene	833275	834216	942	reverse
glnTTG (copy 1 of 1)	834263	834337	75	reverse	predicted to encode tRNA-Gln(UUG)
gene	834374	835225	852	reverse
gene	835227	835844	618	reverse
gene	835849	837573	1725	reverse
gene	837756	839045	1290	forward
gene	839042	840124	1083	forward
prmC gene	840125	840955	831	forward
gene	840949	841704	756	forward
gene	841697	842491	795	forward
gene	842604	843122	519	forward
gene	843259	843564	306	reverse
gene	843619	844098	480	reverse
gene	844091	845362	1272	reverse
gene	845349	846158	810	reverse
gene	846155	847402	1248	reverse
gene	847399	848181	783	reverse
gene	848178	848600	423	reverse
gene	848593	850038	1446	reverse
gene	850039	850968	930	reverse
gene	850972	851931	960	reverse
gene	852043	852258	216	reverse
gene	852255	853241	987	reverse
gene	853451	854350	900	forward
gene	854365	855390	1026	forward
gene	855451	857547	2097	reverse
gene	857660	858814	1155	reverse
gene	858916	859674	759	forward
gene	859811	860728	918	forward
gene	860738	862636	1899	forward
gene	862811	863710	900	reverse
gene	863711	865810	2100	reverse
gene	865890	866180	291	reverse
gene	866179	866664	486	forward
gene	867025	867303	279	reverse
gene	867435	867669	235	reverse
mviN gene	867557	869095	1539	forward
ribF gene	869197	870153	957	forward
gene	870168	872999	2832	forward
gene	872992	873504	513	forward
gene	873497	873949	453	forward
gene	874131	875078	948	forward
gene	875032	875613	582	reverse
pilV gene	875807	876292	486	forward
gene	876289	876996	708	forward
gene	877004	877534	531	forward
gene	877557	877958	402	forward
thiO gene	878021	879130	1110	forward
gene	879117	879350	234	reverse
gene	879474	880499	1026	reverse
gene	880649	881611	963	forward
gene	881608	882333	726	forward
clpB gene	882480	885044	2565	forward
asnGTT (copy 1 of 2 non-identical copies)	885361	885436	76	forward	predicted to encode tRNA-Asn(GUU), sequence type 1
proTGG (copy 1 of 2)	885446	885522	77	forward	predicted to encode tRNA-Pro(UGG)
lysTTT (copy 1 of 2)	885528	885603	76	forward	predicted to encode tRNA-Lys(UUU)
proTGG (copy 2 of 2)	885698	885774	77	forward	predicted to encode tRNA-Pro(UGG)
gene	885907	887205	1299	reverse
gene	887266	887439	174	reverse
gene	887494	888123	630	reverse
gene	888228	888917	690	forward
gene	888993	889208	216	forward
gene	889205	889405	201	reverse
gene	889402	890025	624	reverse
gene	890022	890888	867	reverse
gene	890885	892093	1209	reverse
gene	892296	892709	414	forward
gene	892746	894146	1401	forward
thrCGT (copy 1 of 1)	894195	894267	73	forward	predicted to encode tRNA-Thr(CGU)
gene	894427	894732	306	forward
gene	895539	896387	849	reverse
gene	896634	898784	2151	forward
gene	898846	899409	564	forward
gene	899406	900242	837	forward
gene	900473	902503	2031	forward
gene	902633	903061	429	forward
gene	903011	903787	777	reverse
gene	903790	904785	996	reverse
ptsP gene	905079	907937	2859	forward
pfkB gene	907938	908858	921	forward
gene	908870	910582	1713	forward
gene	910775	912316	1542	forward
gene	912387	914912	2526	reverse
gene	915055	915288	234	forward
gene	915446	916933	1488	forward
gene	916975	918138	1164	reverse
gene	918614	919771	1158	reverse
gene	919768	920421	654	reverse
gene	920434	921327	894	reverse
gene	921348	922064	717	reverse
gene	922396	923979	1584	forward
gene	924239	924484	246	forward
gene	924583	924846	264	forward
gene	925072	926043	972	reverse
dppD gene	926043	927011	969	reverse
gene	927022	927933	912	reverse
gene	927944	928954	1011	reverse
gene	929030	930628	1599	reverse
gene	930709	932106	1398	reverse
gene	932277	933881	1605	reverse
gene	934186	935814	1629	reverse
gene	936073	937674	1602	reverse
gene	937765	938478	714	reverse
gene	938683	939945	1263	forward
gene	939938	940498	561	forward
gene	940596	942320	1725	forward
gene	942445	942882	438	reverse
gene	943030	943659	630	forward
gene	943684	945039	1356	forward
gene	945118	946212	1095	forward
gene	946357	947352	996	reverse
gene	947498	948634	1137	forward
gene	948740	949780	1041	reverse
gene	950029	950457	429	forward
gene	950472	950864	393	forward
petA gene	951132	951725	594	forward
gene	951725	952936	1212	forward
gene	952936	953715	780	forward
gene	953865	954482	618	forward
gene	954500	954919	420	forward
gene	955077	955826	750	forward
gene	955851	956045	195	reverse
gene	956232	957389	1158	reverse
kdgD gene	957634	958545	912	forward
gene	958600	960045	1446	forward
gene	960188	961552	1365	forward
garD gene	961564	963117	1554	forward
gene	963133	963837	705	reverse
gene	963834	964556	723	reverse
gene	964723	965322	600	reverse
gene	965631	966572	942	forward
gene	966680	967063	384	reverse
gene	967060	968106	1047	reverse
gene	968165	968536	372	reverse
gatB gene	968709	970154	1446	reverse
gene	970165	971616	1452	reverse
gene	971633	971920	288	reverse
gene	972131	973168	1038	forward
gene	973309	974382	1074	forward
mreD gene	974382	974870	489	forward
gene	974922	975518	597	forward
gene	975589	977046	1458	forward
gene	977123	980938	3816	forward
gene	980987	981835	849	forward
gene	981852	983294	1443	forward
gene	983340	983861	522	reverse
gene	983970	985316	1347	forward
gene	985469	985864	396	forward
aspA gene	985857	987233	1377	forward
gene	987261	987689	429	forward
gene	987691	988302	612	forward
gene	988336	989229	894	forward
gene	989266	989538	273	reverse
gene	989555	990412	858	reverse
ptsN gene	990415	990879	465	reverse
raiA gene	990890	991195	306	reverse
gene	991343	992836	1494	reverse
lptB gene	993022	993747	726	reverse
lptA gene	993747	994280	534	reverse
lptC gene	994267	994839	573	reverse
gene	994848	995372	525	reverse
gene	995373	996347	975	reverse
gene	996670	997479	810	forward
gene	997479	998276	798	forward
mlaD gene	998276	998743	468	forward
gene	998755	999402	648	forward
gene	999399	999704	306	forward
gene	999819	1000058	240	forward
murA gene	1000082	1001347	1266	forward
gene	1001582	1002217	636	forward
hisD gene	1002592	1003914	1323	forward
gene	1003918	1004970	1053	forward
gene	1005039	1006313	1275	reverse
gene	1006316	1006954	639	reverse
gene	1007119	1007676	558	forward
gene	1007680	1008147	468	forward
gene	1008183	1008668	486	forward
gene	1008799	1009086	288	forward
mqo gene	1009156	1010664	1509	reverse
gene	1011389	1011622	234	reverse
gene	1011817	1012404	588	forward
gene	1012463	1012672	210	reverse
gene	1012855	1013112	258	forward
gene	1013232	1014398	1167	reverse
gene	1014529	1014711	183	forward
gene	1014723	1014983	261	forward
gene	1015020	1015640	621	forward
gene	1015719	1017857	2139	reverse
gene	1018100	1018918	819	forward
gene	1019013	1019597	585	reverse
gene	1019858	1020856	999	reverse
gene	1020887	1021852	966	reverse
gene	1021938	1022570	633	forward
gene	1022702	1024384	1683	forward
gene	1024716	1026575	1860	forward
gene	1026604	1027968	1365	forward
gene	1028194	1030923	2730	forward
gene	1030936	1031496	561	reverse
gene	1031514	1033169	1656	reverse
gene	1033150	1033794	645	reverse
gene	1033791	1034381	591	reverse
gene	1034544	1035188	645	forward
gene	1035387	1036160	774	forward
gene	1036222	1036803	582	reverse
gene	1036800	1037393	594	reverse
gene	1037486	1037857	372	reverse
gene	1037857	1039668	1812	reverse
rsmI gene	1039878	1040750	873	forward
rnpB gene	1040847	1041200	354	forward
gene	1041555	1042010	456	forward
gene	1042013	1042954	942	forward
ftsL gene	1042951	1043244	294	forward
gene	1043241	1044986	1746	forward
gene	1044986	1046449	1464	forward
gene	1046442	1047812	1371	forward
gene	1047812	1048894	1083	forward
gene	1048901	1050247	1347	forward
ftsW gene	1050244	1051467	1224	forward
murG gene	1051457	1052527	1071	forward
gene	1052520	1053965	1446	forward
gene	1053962	1054918	957	forward
gene	1054922	1055791	870	forward
ftsA gene	1055807	1057069	1263	forward
gene	1057136	1058341	1206	forward
gene	1058454	1059365	912	forward
gene	1059729	1060202	474	forward
gene	1060438	1061199	762	forward
gene	1061268	1062761	1494	reverse
gene	1062847	1064169	1323	reverse
gene	1064582	1065946	1365	reverse
gene	1065936	1066628	693	reverse
gene	1066655	1069750	3096	reverse
gene	1069747	1070913	1167	reverse
gene	1071128	1071361	234	forward
gene	1071526	1072296	771	forward
gene	1072331	1073074	744	reverse
gene	1073183	1073665	483	reverse
gene	1073669	1074571	903	reverse
gene	1074780	1075754	975	reverse
gene	1075891	1076859	969	reverse
gene	1077042	1078553	1512	forward
gene	1078564	1080741	2178	forward
gene	1080731	1080931	201	forward
gene	1080942	1081805	864	forward
gene	<1081885	1082112	>228	reverse
gene	1082218	1082619	402	reverse
gene	1082704	1083516	813	reverse
gene	1083531	1083995	465	reverse
gene	1084326	1084586	261	forward
gene	1084968	1085318	351	forward
gene	1085406	1086857	1452	reverse
gene	1087029	1087682	654	reverse
gene	1087699	1088883	1185	reverse
gene	1088895	1090427	1533	reverse
gene	1090583	1091692	1110	reverse
gene	1091701	1093149	1449	reverse
gene	1093161	1094750	1590	reverse
gene	1094750	1096237	1488	reverse
gene	1096234	1097613	1380	reverse
gene	1097784	1098950	1167	reverse
gene	1098840	1099075	236	forward
gene	1098988	1100478	1491	reverse
gene	1100553	1101869	1317	reverse
gene	1102706	1103485	780	reverse
gene	1103605	1104729	1125	forward
gene	1105069	1106463	1395	forward
moaC gene	1106552	1107025	474	forward
moaD gene	1107022	1107264	243	forward
gene	1107267	1107716	450	forward
gene	1107864	1109333	1470	reverse
gene	1109430	1110086	657	reverse
gene	1110431	1111462	1032	forward
gene	1111535	1112716	1182	forward
gene	1112727	1113824	1098	forward
glnQ gene	1113836	1114600	765	forward
gene	1114830	1115321	492	reverse
gene	1115318	1115629	312	reverse
gene	1115788	1116447	660	forward
gene	1116437	1117702	1266	forward
gene	1117697	1118335	639	reverse
gene	1118360	1119505	1146	reverse
gene	1119512	1121992	2481	reverse
gene	1122035	1122760	726	reverse
gene	1122793	1123419	627	reverse
gene	1123464	1124084	621	reverse
gene	1124140	1124760	621	reverse
gene	1124799	1125422	624	reverse
gene	1125457	1126083	627	reverse
gene	1126474	1127304	831	forward
gene	1127488	1128123	636	forward
gene	1128215	1128685	471	forward
gene	1128723	1128998	276	forward
gene	1129074	1130009	936	forward
gene	1130119	1132539	2421	forward
dacB gene	1132635	1134092	1458	forward
gene	1134094	1134873	780	reverse
gene	1134994	1136277	1284	forward
fahA gene	1136282	1137568	1287	forward
maiA gene	1137581	1138216	636	forward
gene	1138450	1139820	1371	forward
gene	1139861	1140664	804	reverse
gene	1140851	1141870	1020	forward
gene	1141925	1142185	261	reverse
gene	1142558	1143046	489	forward
gene	1143043	1143357	315	reverse
sdaC	1143656	1144942	1287	reverse	serine transporter
sdaA1	1145005	1146381	1377	reverse	L-serine deaminase; aerobic
gene	1146519	1147466	948	forward
gene	1147680	1148090	411	forward
gene	1148150	1149664	1515	reverse
gene	1149772	1150683	912	forward
gene	1150788	1153124	2337	reverse
gene	1153216	1154157	942	reverse
gene	1154154	1154642	489	reverse
gene	1154813	1155115	303	forward
gene	1155112	1156686	1575	forward
gene	1156687	1157013	327	forward
gene	1157024	1157599	576	forward
gene	1157596	1158573	978	forward
gene	1158574	1158924	351	reverse
gene	1158924	1159928	1005	reverse
gene	1160325	1160606	282	forward
gene	1160772	1161791	1020	reverse
gene	1162221	1165067	2847	reverse
gene	1165365	1165742	378	reverse
gene	1165750	1166178	429	reverse
gene	1166337	1167827	1491	reverse
lptF gene	1168112	1169230	1119	forward
lptG gene	1169223	1170302	1080	forward
gene	1170454	1172253	1800	forward
lepB gene	1172259	1173113	855	forward
gene	1173260	1173949	690	forward
gene	1173942	1174844	903	forward
gene	1175039	1175728	690	forward
gene	1175781	1176524	744	forward
gene	1176721	1178160	1440	forward
gene	1178160	1178657	498	forward
gene	1178738	1179694	957	reverse
gene	1179691	1180434	744	reverse
gene	1180620	1181255	636	reverse
gene	1181257	1181646	390	reverse
lon gene	1181855	1184275	2421	reverse
gene	1184434	1185423	990	reverse
gene	1185761	1187083	1323	forward
gene	1187095	1187973	879	forward
gene	1188005	1189345	1341	forward
gene	1189356	1190117	762	forward
gene	1190254	1191003	750	forward
gene	1191017	1191310	294	forward
gene	1191436	1192410	975	forward
gene	1192407	1193582	1176	forward
gene	1194128	1196464	2337	forward
gene	1196675	1197352	678	forward
gene	1197336	1199684	2349	forward
gene	1199690	1200553	864	forward
gene	1200553	1200972	420	forward
gene	1201027	1203438	2412	reverse
gene	1203855	1205873	2019	reverse
gene	1206021	1206254	234	forward
gene	1206259	1206882	624	forward
gene	1206884	1207651	768	reverse
gene	1207648	1208169	522	reverse
gene	1208642	1209151	510	forward
gene	1209203	1209757	555	forward
gene	1209855	1212371	2517	forward
gene	1212368	1213129	762	forward
gene	1213151	1213729	579	forward
gene	1213740	1214234	495	forward
gene	1214248	1214727	480	forward
gene	1214739	1215287	549	forward
gene	1215419	1216390	972	forward
gene	1216458	1217423	966	forward
gene	1217425	1220523	3099	reverse
gene	1220636	1225867	5232	reverse
gene	1226344	1227753	1410	forward
gene	1227772	1234284	6513	reverse
gene	1234348	1235481	1134	reverse
gene	1235808	1237427	1620	reverse
gene	1237612	1237884	273	forward
gene	1238051	1238329	279	forward
higA gene	1238338	1238643	306	forward
gene	1238734	1240113	1380	reverse
gene	1240110	1241924	1815	reverse
gene	1241935	1242870	936	reverse
gene	1242925	1244799	1875	reverse
gene	1245018	1246343	1326	forward
gene	1246340	1246756	417	forward
gene	1246762	1247268	507	forward
gene	1247320	1248237	918	reverse
gene	1248326	1253761	5436	reverse
gene	1254035	1255054	1020	forward
gene	1255110	1255763	654	forward
gene	1255949	1256869	921	forward
gene	1256866	1257246	381	forward
gene	1257243	1257647	405	forward
gene	1257716	1258588	873	reverse
gene	1258645	1259415	771	reverse
gene	1259644	1260348	705	forward
gene	1260341	1261735	1395	forward
gene	1261732	1262631	900	forward
gene	1262751	1263875	1125	forward
gene	1263875	1265644	1770	forward
gene	1265634	1267031	1398	forward
gene	1267162	1267500	339	reverse
gene	1267500	1268828	1329	reverse
gene	1268846	1270747	1902	reverse
gene	1270979	1271713	735	reverse
gene	1271710	1272381	672	reverse
gene	1272381	1273127	747	reverse
gene	1273323	1274249	927	reverse
gene	1274554	1276092	1539	reverse
gene	1276397	1277152	756	reverse
glpK gene	1277236	1278741	1506	reverse
gene	1278823	1279680	858	reverse
gene	1280009	1280479	471	forward
gene	1280615	1281724	1110	reverse
argF gene	1281721	1282641	921	reverse
gene	1282762	1283042	281	reverse
gene	1283075	1285183	2109	forward
grxD gene	1285261	1285599	339	forward
bfr gene	1285679	1286149	471	reverse
gene	1286351	1286569	219	reverse
gene	1286813	1287415	603	forward
rnt gene	1287753	1288424	672	reverse
gene	1288421	1289467	1047	reverse
gene	1289624	1290532	909	forward
gene	1290674	1291891	1218	forward
gene	1292517	1293149	633	forward
gene	1293234	1293416	183	reverse
nth gene	1293524	1294162	639	reverse
gene	1294290	1295453	1164	reverse
metG gene	1295604	1297655	2052	reverse
gene	1297828	1298922	1095	forward
gene	1299263	1299496	234	forward
gene	1299417	1299740	324	reverse
mutS gene	1299883	1302474	2592	reverse
gene	1302644	1303015	372	reverse
gene	1303008	1303496	489	reverse
gene	1303763	1304497	735	forward
gene	1305089	1305433	345	forward
gene	1305455	1305970	516	forward
gene	1305974	1306585	612	forward
gene	1306595	1306927	333	forward
gene	1306924	1307919	996	forward
gene	1307916	1308545	630	forward
gene	1308546	1310522	1977	forward
gene	1310591	1310917	327	forward
gene	1311003	1311194	192	forward
gene	1311197	1312363	1167	forward
gene	1312363	1312869	507	forward
gene	1312921	1313493	573	forward
gene	1313622	1314773	1152	forward
gene	1314773	1315156	384	forward
gene	1315149	1315361	213	forward
gene	1315371	1316381	1011	forward
gene	1316403	1316960	558	forward
gene	1316948	1317448	501	forward
gene	1317530	1318030	501	forward
recA gene	1318115	1319173	1059	forward
gene	1319182	1319649	468	forward
gene	1319893	1321005	1113	reverse
gene	1321383	1321823	441	reverse
gene	1322003	1322722	720	forward
gene	1322976	1323626	651	forward
gene	1323702	1324064	363	forward
gene	1324068	1325054	987	reverse
gene	1325120	1325899	780	forward
tsaA gene	1325962	1326657	696	reverse
gene	1326661	1327122	462	reverse
gene	1327191	1327901	711	reverse
gene	1328004	1328471	468	reverse
gene	1328569	1329909	1341	reverse
gene	1330091	>1330225	>135	reverse
gene	1330601	1332502	1902	forward
gene	1332630	1333736	1107	forward
gene	1334008	1334193	186	forward
mdoD gene	1334247	1335872	1626	reverse
gene	1336237	1338099	1863	reverse
gene	1338200	1339624	1425	reverse
gene	1339732	1340541	810	reverse
gene	1340531	1341460	930	reverse
gene	1341462	1342496	1035	reverse
gene	1342635	1343786	1152	reverse
gene	1343860	1345347	1488	reverse
gene	1345450	1346361	912	reverse
gene	1346530	1347240	711	forward
gene	1347286	1351635	4350	reverse
gene	1351646	1351891	246	forward
gene	1352270	1353892	1623	forward
gene	1353892	1354404	513	forward
gene	1354401	1355660	1260	forward
gene	1355657	1356355	699	forward
gene	1356352	1358619	2268	forward
gene	1358616	1359626	1011	forward
gene	1359676	1360677	1002	forward
gene	1360994	1361236	243	forward
gene	1361387	1362482	1096	forward
lysS gene	1362578	1364080	1503	forward
gene	1364187	1364903	717	forward
gene	1364920	1365468	549	forward
gene	1365490	1366767	1278	forward
gene	1366795	1367700	906	forward
gene	1367697	1368023	327	forward
gene	1368201	1368545	345	forward
gene	1368719	1368913	195	forward
gene	1368943	1369728	786	reverse
gene	1369784	1370209	426	reverse
gene	1370483	1370827	345	reverse
gene	1371012	1373639	2628	forward
gene	1373920	1374567	648	forward
tsaB gene	1374657	1375340	684	forward
gene	1375541	1375831	291	forward
gene	1375831	1376691	861	forward
gene	1376719	1377546	828	forward
gene	1377550	1378248	699	forward
gene	1378252	1378872	621	reverse
gene	1378969	1379751	783	forward
gene	1379882	1380517	636	reverse
gene	1380612	1381712	1101	forward
gene	1381719	1384784	3066	forward
gene	1385220	1385909	690	reverse
gene	1385950	1386351	402	reverse
gene	1386403	1388922	2520	reverse
gene	1389103	1389312	210	forward
gene	1389498	1389875	378	reverse
gene	1389930	1390739	810	reverse
gene	1390739	1391890	1152	reverse
gene	1392128	1394719	2592	reverse
gene	1394931	1395746	816	forward
gene	1395863	1396276	414	reverse
gene	1396273	1397478	1206	reverse
dapD gene	1397543	1398577	1035	reverse
gene	1398610	1398972	363	reverse
gene	1399185	1400828	1644	forward
dapC gene	1400844	1402040	1197	reverse
gene	1402200	1404902	2703	reverse
map gene	1404967	1405749	783	reverse
rpsB gene	1406137	1406874	738	forward
tsf gene	1407078	1407941	864	forward
gene	1408153	1408896	744	forward
gene	1408893	1409450	558	forward
uppS gene	1409468	1410223	756	forward
gene	1410224	1411030	807	forward
gene	1411027	1412217	1191	forward
rseP gene	1412271	1413623	1353	forward
bamA gene	1413698	1416085	2388	forward
gene	1416131	1416634	504	forward
gene	1416638	1417693	1056	forward
fabZ gene	1417805	1418245	441	forward
gene	1418242	1419018	777	forward
gene	1419021	1420160	1140	forward
gene	1420157	1420789	633	forward
gene	1420868	1424389	3522	forward
gene	1424519	1425466	948	forward
tilS gene	1425630	1426949	1320	forward
pyrG gene	1427223	1428854	1632	forward
gene	1428860	1429705	846	forward
gene	1429863	1431152	1290	forward
gene	1431333	1431611	279	forward
gene	1431608	1432315	708	forward
gene	1432436	1433332	897	reverse
gene	1433442	1434554	1113	forward
fghA gene	1434563	1435408	846	forward
gene	1435463	1435936	474	forward
gene	1435933	1436991	1059	forward
gene	1436979	1437728	750	forward
gene	1437728	1438405	678	forward
gene	1438613	1439449	837	forward
gene	1439556	1440560	1005	forward
gene	1440759	1440968	210	reverse
gene	1441358	1441924	567	forward
gene	1442033	1442245	213	forward
gene	1442279	1442929	651	reverse
gene	1442929	1445409	2481	reverse
gene	1445467	1446231	765	reverse
gene	1446245	1447363	1119	reverse
gene	1447373	1448083	711	reverse
gene	1448080	1448808	729	reverse
gene	1448866	1449645	780	reverse
gene	1449866	1451500	1635	reverse
gene	1451497	1452501	1005	reverse
gene	1452749	1455190	2442	reverse
gene	1455361	1456005	645	reverse
gene	1456472	1456672	201	reverse
gene	1456669	1457151	483	reverse
gene	1457171	1457641	471	reverse
gene	1457646	1458143	498	reverse
gene	1458334	1459029	696	forward
gene	1459177	1459935	759	forward
gene	1460037	1460501	465	reverse
gene	1460601	1462745	2145	forward
gene	1462834	1465131	2298	forward
gene	1465214	1466359	1146	forward
gene	1466503	1467648	1146	forward
pdxH gene	1467676	1468323	648	forward
gene	1468360	1468620	261	reverse
gene	1468778	1469242	465	forward
nhaA gene	1469659	1470834	1176	reverse
gene	1471051	1472145	1095	forward
gene	1472207	1473820	1614	reverse
gene	1473928	1474599	672	reverse
gene	1474696	1475295	600	reverse
gene	1475400	1476308	909	forward
gene	1476305	1476790	486	reverse
gene	1476787	1477563	777	reverse
gene	1477560	1478438	879	reverse
gene	1478462	1478758	297	reverse
gene	1478930	1479631	702	reverse
livG gene	1479633	1480400	768	reverse
livM gene	1480397	1481650	1254	reverse
gene	1481647	1482570	924	reverse
gene	1482800	1483927	1128	reverse
gene	1484269	1484571	303	forward
gene	1484881	1487058	2178	reverse
gene	1487263	1489527	2265	reverse
gene	1489666	1490031	366	reverse
gene	1490030	1490264	235	forward
gene	1490284	1491630	1347	forward
gene	1491750	1494596	2847	reverse
gene	1494816	1495157	342	forward
gene	1495154	1496335	1182	reverse
gene	1496332	1496802	471	reverse
gene	1496893	1497759	867	reverse
gene	1497890	1498051	162	forward
gene	1498476	1499951	1476	reverse
gene	1500266	1500466	201	reverse
gene	1501030	1501872	843	forward
gene	1502018	1503358	1341	forward
gene	1503623	1504480	858	forward
gene	1504480	1505259	780	forward
pcaF gene	1505259	1506458	1200	forward
pcaH gene	1506476	1507180	705	forward
pcaG gene	1507182	1507748	567	forward
gene	1507925	1509220	1296	forward
gene	1509231	1510595	1365	forward
pcaD gene	1510606	1511397	792	forward
pcaC gene	1511453	1511851	399	forward
gene	1511892	1512776	885	reverse
gene	1512936	1514393	1458	reverse
gene	1514696	1516234	1539	reverse
gene	1516326	1517576	1251	reverse
gene	1517731	1519341	1611	reverse
gene	1519353	1521050	1698	reverse
gene	1521202	1522659	1458	reverse
gene	1522656	1525817	3162	reverse
gene	1525821	1526966	1146	reverse
gene	1527253	1527885	633	forward
gene	1528312	1529667	1356	forward
gene	1529664	1530218	555	forward
gene	1530722	1532197	1476	forward
gene	1532194	1532787	594	forward
gene	1532873	1533640	768	forward
gene	1533733	1534788	1056	reverse
gene	1534819	1535985	1167	reverse
gene	1535999	1536325	327	reverse
gene	1536480	1537064	585	forward
gene	1537177	1537968	792	reverse
gene	1537968	1538723	756	reverse
gene	1538910	1539983	1074	forward
gene	1539980	1540291	312	forward
gene	1540471	1541862	1392	forward
gene	1541985	1542575	591	forward
gene	1542577	1543734	1158	forward
gene	1543915	1546206	2292	reverse
gene	1546449	1547060	612	forward
gene	1547079	1547807	729	forward
gene	1547836	1548453	618	forward
gene	1548675	1549877	1203	forward
gene	1549919	1550818	900	reverse
gene	1550979	1553543	2565	reverse
gene	1553672	1554640	969	reverse
gene	1554637	1555176	540	reverse
gene	1555325	1556197	873	reverse
gene	1556225	1557007	783	reverse
gene	1557168	1557695	528	forward
gene	1557813	1558829	1017	reverse
gene	1558955	1560103	1149	forward
gene	1560070	1561257	1188	reverse
gene	1561352	1562026	675	forward
gene	1562026	1562934	909	forward
gene	1563024	1564217	1194	forward
gene	1564214	1565155	942	forward
gene	1565215	1566546	1332	forward
gene	1566547	1567035	489	reverse
gene	1567105	1568022	918	forward
gene	1568030	>1568152	>123	reverse
gene	1568231	1568641	411	forward
gene	1568696	1569337	642	forward
gene	1569457	1569984	528	forward
gene	1570039	1570464	426	reverse
gene	1570579	1571079	501	reverse
gene	1571168	1571491	324	reverse
gene	1571571	1571981	411	reverse
gene	1572004	1572186	183	reverse
gene	1572355	1573248	894	reverse
gene	1573344	1574507	1164	forward
gene	1574504	1575697	1194	forward
gene	1575748	1576053	306	reverse
gene	1576077	1576601	525	reverse
glyCCC (copy 1 of 1)	1576789	1576862	74	reverse	predicted to encode tRNA-Gly(CCC)
gene	1577024	1577908	885	reverse
gene	1578215	1578907	693	reverse
gene	1578907	1579119	213	reverse
gene	1579204	1580826	1623	reverse
gene	1581089	1581448	360	forward
gene	1581504	1582616	1113	reverse
gene	1582753	1583445	693	forward
gene	1583670	1585559	1890	forward
gene	1585875	1587893	2019	forward
gene	1588135	1590387	2253	forward
gene	1590914	1594075	3162	reverse
gene	1594244	1595272	1029	reverse
gene	1595265	1596779	1515	reverse
gene	1596781	1597239	459	reverse
gene	1597369	1598352	984	reverse
gene	1598386	1599678	1293	reverse
gene	1599914	1600585	672	forward
gene	1600578	1601963	1386	forward
gene	1601964	1602785	822	reverse
gene	1602822	1603763	942	reverse
gene	1603904	1604158	255	forward
gene	1604142	1604588	447	forward
gene	1604557	>1604748	>192	reverse
gene	1604792	1606234	1443	forward
gene	1606425	1606847	423	forward
gene	1607561	1608328	768	forward
gene	1608325	1608504	180	forward
gene	1608501	1608791	291	forward
gene	1608879	1609415	537	forward
gene	1609454	1610497	1044	forward
gene	1611028	1612632	1605	reverse
rpoE gene	1613097	1613678	582	forward
gene	1613711	1614298	588	forward
gene	1614314	1615276	963	forward
gene	1615511	1616947	1437	forward
gene	1617013	1618446	1434	reverse
gene	1618542	1618781	240	forward
gene	1618813	1619883	1071	forward
gene	1620047	1620520	474	reverse
gene	1620532	1621092	561	reverse
gene	1621366	1622244	879	forward
gene	1622262	1623377	1116	forward
gene	1623382	1624140	759	forward
gene	1624168	1624881	714	forward
serCGA (copy 1 of 1)	1624965	1625054	90	forward	predicted to encode tRNA-Ser(CGA)
gene	<1625367	1625877	>511	forward
gene	1626069	1627358	1290	forward
gene	1627863	1628042	180	forward
gene	1628187	1629413	1227	reverse
gene	1629697	1629951	255	forward
gene	1630142	1631767	1626	forward
gene	1631773	>1632202	>430	reverse
gene	<1632195	1632317	>123	reverse
gene	1632527	1633429	903	forward
gene	1633421	1634179	759	reverse
gene	1634179	1635483	1305	reverse
gene	1635731	1636453	723	forward
gene	1636450	1637238	789	forward
gene	1637306	1638238	933	forward
gene	1638302	1639180	879	forward
gene	1639254	1640576	1323	forward
gene	1640632	1641957	1326	forward
gene	1642218	1643141	924	forward
gene	1643191	1643553	363	forward
gene	1643679	1644614	936	reverse
gene	1644752	1645939	1188	reverse
gene	1646143	1647585	1443	reverse
gene	1647582	1649207	1626	reverse
gene	1649320	1650192	873	forward
gene	1651055	1651669	615	reverse
gene	1651703	1652569	867	reverse
gene	1652674	1653579	906	forward
gene	1653901	1654779	879	reverse
pobA gene	1654960	1656153	1194	forward
gene	1656220	1657737	1518	forward
gene	1658254	1659093	840	reverse
gene	1659144	1659914	771	reverse
gene	1660258	1661628	1371	forward
gene	1661730	1662329	600	forward
rnd gene	1662452	1663585	1134	forward
gene	1663582	1663875	294	forward
gene	1663983	1664915	933	forward
gene	1665041	1665625	585	reverse
gene	1665779	1666228	450	forward
gene	1666242	1667462	1221	forward
gene	1667530	1667880	351	reverse
gene	1667949	1668416	468	reverse
gene	1668584	1668958	375	reverse
gene	1669057	1669977	921	forward
gene	1670655	1671341	687	reverse
gene	1671420	1671698	279	forward
gene	1671695	1672168	474	reverse
gene	1672239	1674281	2043	reverse
gene	1674306	1674842	537	forward
gene	1674873	1675649	777	forward
gene	1675661	1676203	543	forward
gene	1676328	1677251	924	reverse
gene	1677428	1678168	741	forward
gene	1678165	1678869	705	forward
gene	1678866	1679774	909	forward
gene	1679908	1681086	1179	reverse
gene	1681086	1681931	846	reverse
gene	1682031	1683107	1077	reverse
cysK gene	1683234	1684208	975	forward
gene	1684383	1685321	939	forward
acnA gene	1685454	1688195	2742	reverse
gene	1688386	1689462	1077	forward
gene	1689605	1689856	252	forward
gene	1689853	1691247	1395	reverse
gene	1691388	1692530	1143	forward
gene	1693010	1694788	1779	forward
gene	1695023	1696951	1929	reverse
gene	1697165	1699084	1920	forward
gene	1699268	1699708	441	reverse
gene	1699814	1700251	438	forward
gene	1700733	1702880	2148	forward
fadA gene	1702910	1704085	1176	forward
gene	1704183	1704419	237	forward
topA gene	1704534	1707155	2622	forward
gene	1707354	1707875	522	forward
gene	1707994	1708227	234	forward
gene	1708545	1709018	474	reverse
gene	1709029	1709637	609	reverse
gene	1709901	1710608	708	forward
gene	1710745	1711755	1011	forward
gene	1711868	1714561	2694	reverse
gene	1714571	1715137	567	reverse
gene	1715149	1718598	3450	reverse
gap gene	1718939	1720402	1464	forward
gene	1721010	1721543	534	reverse
gene	1721804	1723198	1395	forward
gene	1723241	1723963	723	reverse
gene	1724010	1724594	585	reverse
gene	1724689	1725939	1251	forward
lolD gene	1725932	1726630	699	forward
gene	1726692	1727936	1245	forward
gene	1728043	1729389	1347	reverse
gene	1729386	1730066	681	reverse
gene	1730221	1730733	513	forward
gene	1730803	1731633	831	forward
gene	1731696	1731962	267	reverse
gene	1732073	1732681	609	reverse
gene	1732877	1733566	690	forward
gene	1733806	1734102	297	reverse
gene	1734142	1734333	192	reverse
gene	1734379	1735560	1182	forward
gene	1735560	1736042	483	forward
tal gene	1736243	1737169	927	reverse
gene	1737423	1738433	1011	reverse
gene	1738537	1739688	1152	forward
gene	1739663	>1739752	>90	reverse
gene	1739762	1740658	897	reverse
gene	1740704	1741582	879	reverse
gene	1741734	1743491	1758	forward
gene	1743491	1744543	1053	forward
gene	1744680	1745666	987	reverse
gene	1745663	1746196	534	reverse
gene	1746412	1747092	681	reverse
gene	1747117	1747455	339	reverse
gene	1748492	1748782	291	reverse
gene	1748989	1750365	1377	reverse
gene	1750601	1750816	216	reverse
gene	1751258	1752313	1056	reverse
gene	1753280	1753723	444	forward
gene	1753796	1754017	222	forward
gene	1754392	1755048	657	reverse
gene	1755242	1756429	1188	reverse
gene	1756586	1759408	2823	forward
gene	1759405	1760604	1200	forward
gene	1760730	1763642	2913	forward
gene	1763642	1764289	648	forward
gene	1764290	1764784	495	reverse
gene	1764781	1765248	468	reverse
gene	1765259	1766164	906	reverse
gene	1766167	1768743	2577	reverse
gene	1768784	1769482	699	reverse
gene	1769549	1770121	573	reverse
mqo gene	1770503	1772149	1647	forward
gene	1772234	1772899	666	reverse
gene	1773000	1773896	897	forward
gene	1774073	1774402	330	forward
gene	1774410	1774784	375	reverse
gene	1774984	1775241	258	reverse
gene	1775518	1776891	1374	reverse
gene	1777042	1777866	825	reverse
gene	1778177	1779370	1194	forward
gene	1779437	1780696	1260	reverse
gene	1780954	1781859	906	reverse
gene	1781962	1783131	1170	forward
gene	1783253	1784167	915	reverse
gene	1784290	1785474	1185	forward
gene	1785603	1786436	834	reverse
gene	1786595	1788097	1503	forward
gene	1788213	1789145	933	reverse
gene	1789238	1790002	765	reverse
gene	1790185	1791072	888	forward
gene	1791076	1792023	948	forward
gene	1792020	1792877	858	forward
gene	1792874	1793830	957	forward
gene	1793827	1794798	972	forward
gene	1794831	1796345	1515	forward
gene	1796414	1797154	741	reverse
gene	1797147	1797326	180	reverse
gene	1797333	1798004	672	reverse
gene	1798009	1798707	699	reverse
gene	1798772	1800103	1332	reverse
mtnA gene	1800212	1801288	1077	forward
gene	1801713	1804367	2655	forward
gene	1804610	1805695	1086	forward
pheA gene	1805695	1806789	1095	forward
gene	1806799	1807911	1113	forward
gene	1807904	1810150	2247	forward
gene	1810147	1810836	690	forward
gene	1810957	1812648	1692	forward
gene	1812811	1813095	285	forward
ihfB gene	1813228	1813524	297	forward
gene	1813550	1813789	240	forward
gene	1814671	1815954	1284	forward
gene	1815954	1816760	807	forward
gene	1816763	1817986	1224	forward
gene	1818739	1819305	567	forward
gene	1819360	1820394	1035	forward
gene	1820398	1821525	1128	forward
gene	1821538	1822668	1131	forward
gene	1822674	1823891	1218	forward
gene	1824077	1824721	645	forward
gene	1824721	1824927	207	forward
gene	1825085	1826116	1032	forward
gene	1826168	1827250	1083	forward
gene	1827247	1828008	762	forward
gene	1828005	1828670	666	forward
gene	1828674	1829690	1017	forward
gene	1829739	1830917	1179	forward
gene	1831310	1833304	1995	forward
gene	1833415	1833747	333	forward
gene	1833769	1834347	579	reverse
gene	1834480	1835124	645	forward
gene	1835140	1835988	849	forward
gene	1836063	1836230	168	reverse
eat gene	1836342	1837706	1365	reverse
kdpF gene	1838109	1838198	90	forward
gene	1838208	1839902	1695	forward
kdpB gene	1839912	1841975	2064	forward
gene	1842114	1842659	546	forward
gene	1842783	1845434	2652	forward
gene	1845472	1846161	690	forward
gene	1846209	1847246	1038	reverse
gene	1847484	1847762	279	forward
gene	1847804	1848565	762	forward
gene	1848656	1849453	798	forward
gene	1849456	1849818	363	reverse
gene	1849935	1850325	391	reverse
gene	1850367	1850774	408	reverse
gene	1850822	1851223	402	reverse
gene	1851220	1855938	4719	reverse
gene	1856137	1857618	1482	reverse
gene	1857715	1858521	807	reverse
gene	1858757	1860178	1422	forward
gene	1860282	1860716	435	forward
gene	1860967	1861275	309	forward
gene	1861280	1863010	1731	reverse
gene	1863026	1863751	726	reverse
gene	1863748	1864674	927	reverse
gene	1864894	1865880	987	forward
greB gene	1865993	1866466	474	forward
gene	1866512	1869022	2511	reverse
gene	1869022	1869705	684	reverse
gene	1869716	1870321	606	forward
gene	1870380	1870673	294	forward
gene	1870747	1871712	966	forward
gene	1871897	1872148	252	reverse
gene	1872762	1873043	282	forward
gene	1873108	1874184	1077	reverse
gene	1874316	1874750	435	reverse
gene	1874749	1875135	387	forward
gene	1875132	1876094	963	forward
gene	1876110	1877015	906	forward
gene	1877086	1877586	501	forward
gene	1877690	1878664	975	forward
gene	1878716	1879198	483	reverse
gene	1879204	1879572	369	reverse
gene	1879705	1880838	1134	forward
gene	1880888	1881460	573	forward
gene	1881526	1882542	1017	reverse
gene	1882571	1882990	420	reverse
gene	1883225	1883677	453	reverse
gene	1883757	1884707	951	reverse
gene	1884817	1885566	750	forward
gene	1885556	1886410	855	reverse
gene	1886427	1886714	288	forward
gene	1886760	1887989	1230	forward
gene	1888121	1889467	1347	reverse
gene	1889592	1890347	756	forward
gene	1890451	1891242	792	reverse
gene	1891666	1893339	1674	forward
gene	1893464	1894231	768	reverse
gene	1894335	1894991	657	forward
gene	1896296	1897183	888	reverse
gene	1897488	1898699	1212	reverse
msrB gene	1898902	1899294	393	forward
gene	1899550	1900482	933	forward
gene	1900686	1901171	486	forward
gene	1901168	1901647	480	forward
gene	1901601	1903910	2310	reverse
gene	1904075	1904965	891	forward
gene	1904962	1905444	483	forward
gene	1905470	1909105	3636	reverse
gene	1909114	1909740	627	reverse
gene	1909991	1910392	402	reverse
gene	1910567	1911898	1332	reverse
gene	1911970	1913133	1164	reverse
gene	1913309	1913650	342	reverse
gene	1913647	1914030	384	reverse
gene	1914034	1914348	315	reverse
gene	1914696	1915904	1209	forward
gene	1915891	1917627	1737	reverse
gene	1917778	1918014	237	forward
gene	1918090	1918425	336	forward
gene	1918497	1919387	891	forward
gene	1919443	1919664	222	reverse
gene	1919744	1920346	603	reverse
moaB gene	1920423	1920962	540	forward
gene	1920946	1922172	1227	forward
gene	1922424	1922753	330	reverse
gene	1922750	1924327	1578	reverse
gene	1924528	1925163	636	forward
ccmB gene	1925160	1925828	669	forward
gene	1925915	1926670	756	forward
ccmD gene	1926667	1926843	177	forward
gene	1926840	1927295	456	forward
gene	1927299	1929287	1989	forward
gene	1929284	1929820	537	forward
gene	1929817	1930290	474	forward
ccmI gene	1930283	1931470	1188	forward
gene	1931486	1931881	396	forward
gene	1932073	1932348	276	reverse
gene	1932907	1934427	1521	reverse
gene	1934514	1935386	873	reverse
pabB gene	1935383	1937452	2070	reverse
gene	1937449	1937790	342	reverse
gene	1937832	1939103	1272	reverse
gene	1939117	1939977	861	reverse
gene	1939974	1941407	1434	reverse
gene	1941742	>1942002	>261	forward
phnC gene	1942358	1943191	834	forward
phnD gene	1943224	1944225	1002	forward
phnE gene	1944397	1945179	783	forward
phnF gene	1945243	1945920	678	forward
phnG gene	1945932	1946369	438	forward
gene	1946369	1946959	591	forward
gene	1946959	1948035	1077	forward
gene	1948028	1948870	843	forward
phnK gene	1948867	1949667	801	forward
phnL gene	1949664	1950386	723	forward
gene	1950376	1951521	1146	forward
gene	1951521	1952093	573	forward
gene	1952084	1952833	750	forward
gene	1952867	1953760	894	reverse
gene	1953967	1954140	174	forward
gene	1954152	1954556	405	forward
gene	1954946	1956478	1533	forward
gene	1956488	1957684	1197	reverse
gene	1957861	1958475	615	forward
gene	1958594	1959598	1005	reverse
gene	1959704	1960528	825	reverse
gene	1960560	1961435	876	reverse
pyk gene	1961470	1962885	1416	reverse
gene	1962875	1964155	1281	reverse
gene	1964214	1965104	891	reverse
hyi gene	1965250	1966032	783	reverse
gcl gene	1966043	1967818	1776	reverse
gene	1968075	1968515	441	forward
gene	1968632	1969237	606	reverse
gene	1969372	1970286	915	forward
gene	1970455	1970886	432	reverse
gene	1971149	1971937	789	reverse
gene	1971930	1973228	1299	reverse
gene	1973465	1973833	369	forward
gene	1973915	1975468	1554	reverse
gene	1975801	1976652	852	forward
gene	1976915	1977226	312	forward
actP gene	1977223	1978881	1659	forward
gltA gene	1979150	1980439	1290	reverse
sdhC gene	1980805	1981179	375	forward
sdhD gene	1981173	1981541	369	forward
gene	1981545	1983317	1773	forward
sdhB gene	1983329	1984033	705	forward
gene	1984295	1987126	2832	forward
gene	1987171	1988397	1227	forward
lpdA gene	1988497	1989933	1437	forward
gene	1990138	1991304	1167	forward
gene	1991304	1992185	882	forward
brnQ gene	1992598	1993911	1314	forward
gene	1994108	1994845	738	forward
gene	1994936	1995187	252	reverse
gene	1995346	1995822	477	forward
gene	1995819	1996271	453	forward
gene	1996361	1998265	1905	forward
gene	1998332	1999060	729	forward
gene	1999159	2000025	867	reverse
gene	2000090	2000506	417	reverse	start of variable region around replication terminus (Silby et al., 2009); grey highlighting
gene	2000650	2001672	1023	forward
gene	2001833	2003053	1221	reverse
fabA gene	2003065	2003580	516	reverse
gene	2003830	2005731	1902	reverse
gene	2005728	2006657	930	reverse
gene	2006659	2008740	2082	reverse
gene	2008975	2010000	1026	forward
gene	2010011	2010358	348	forward
sixA gene	2010355	2010804	450	forward
gene	2010890	2012539	1650	forward
gene	2012570	2013013	444	forward
gene	2013111	2013914	804	forward
gene	2013911	2014765	855	forward
gene	2014868	2015686	819	forward
gene	2015759	2016820	1062	forward
gene	2016875	2017912	1038	reverse
gene	2017912	2018676	765	reverse
pyrF gene	2018938	2019636	699	forward
gene	2019705	2020712	1008	reverse
gene	2020942	2021703	762	forward
gene	2021907	2023319	1413	forward
gene	2023434	2025401	1968	forward
gene	2025438	2026250	813	reverse
gene	2027523	2028293	771	reverse
gluTTC (copy 1 of 4)	2028653	2028728	76	forward	predicted to encode tRNA-Glu(UUC)
glyGCC (copy 1 of 3)	2028733	2028808	76	forward	predicted to encode tRNA-Gly(GCC)
gluTTC (copy 2 of 4)	2028913	2028988	76	forward	predicted to encode tRNA-Glu(UUC)
glyGCC (copy 2 of 3)	2028992	2029067	76	forward	predicted to encode tRNA-Gly(GCC)
gene	2029168	2030904	1737	reverse
gene	2031118	2032857	1740	reverse
gene	2033027	2033527	501	reverse
gene	2033655	2034281	627	reverse
gene	2034371	2035354	984	forward
gene	2035461	2035868	408	reverse
fadE gene	2035944	2038391	2448	reverse
gene	2038583	2039242	660	forward
gene	2039300	2039917	618	forward
gene	2040053	2040985	933	forward
gene	2040982	2041761	780	forward
gene	2041893	2042432	540	reverse
gene	2042524	2043717	1194	forward
gene	2043763	2044074	312	forward
gene	2044182	2045330	1149	forward
gene	2045398	2047266	1869	forward
gene	2047377	2047691	315	reverse
gene	2047798	2048763	966	reverse
gene	2048903	2049823	921	reverse
valTAC (copy 1 of 3)	2049983	2050058	76	forward	predicted to encode tRNA-Val(UAC)
aspGTC (copy 1 of 4)	2050078	2050154	77	forward	predicted to encode tRNA-Asp(GUC)
valTAC (copy 2 of 4)	2050331	2050406	76	forward	predicted to encode tRNA-Val(UAC)
aspGTC (copy 2 of 3)	2050426	2050502	77	forward	predicted to encode tRNA-Asp(GUC)
gene	2050736	2052049	1314	forward
gene	2052462	2054042	1581	forward
gene	2054039	2055073	1035	forward
gene	2055070	2056128	1059	forward
gene	2056125	2056973	849	forward
gene	2056981	2059596	2616	forward
gene	2059818	2060150	333	forward
gene	2060225	2061265	1041	reverse
gene	2061378	2061641	264	forward
gene	2061881	2063431	1551	forward
gene	2063428	2064177	750	forward
gene	2064382	2064453	72	reverse
gene	2064641	2065021	381	reverse
gene	2065143	2065337	195	reverse
gene	2065341	2066630	1290	reverse
gene	2066634	2068031	1398	reverse
gene	2068587	2068907	321	reverse
gene	2068951	2070162	1212	reverse
gene	2070246	2071238	993	reverse
gene	2071397	2072293	897	reverse
gene	2072409	2073578	1170	forward
gene	2073587	2074123	537	reverse
gene	2074241	2075668	1428	forward
cydB gene	2075672	2076679	1008	forward
gene	2076811	2077362	552	reverse
gene	2077477	2078760	1284	reverse
gene	2078802	2079044	243	forward
gene	2079279	2079545	267	reverse
gene	2079588	2079911	324	reverse
gene	2079995	2080360	366	reverse
gene	2080357	2081703	1347	reverse
gene	2081952	2082275	324	reverse
gene	<2082443	2082808	>366	forward
gene	2082870	2084417	1548	forward
gene	2084638	2085786	1149	reverse
gene	2085949	2087205	1257	reverse
gene	2087699	2091592	3894	forward
gene	2091920	2093644	1725	reverse
gene	2093866	2094063	198	forward
gene	2094201	2095160	960	reverse
gene	2095291	2095620	330	reverse
gene	2096077	2096442	366	forward
gene	2096451	2098007	1557	reverse
gene	2098018	2098326	309	reverse
gene	2098330	2099712	1383	reverse
gene	2099709	2100665	957	reverse
gene	2100771	2101025	255	reverse
gene	2101195	2101467	273	forward
gene	2101599	2101876	278	reverse
gene	2102000	2104750	2751	reverse
gene	2104750	2105166	417	reverse
gene	2105129	2106646	1518	reverse
gene	2106636	2107448	813	reverse
gene	2107445	2108086	642	reverse
gene	2108083	2108496	414	reverse
gene	2108504	2108875	372	reverse
gene	2108893	2109132	240	reverse
gene	2109129	2109464	336	reverse
gene	2110050	>2110349	>300	reverse
gene	2110431	2110970	540	reverse
gabD gene	2111744	2113240	1497	reverse
gene	2113273	2114283	1011	reverse
gene	2114295	2115299	1005	reverse
gene	2115557	2116237	681	forward
gene	2116234	2117367	1134	reverse
gene	2117386	2118549	1164	reverse
gene	2118564	2118926	363	reverse
gene	2118937	2119869	933	reverse
gene	2120289	2121203	915	reverse
gene	2121590	2122606	1017	forward
hisD gene	2122639	2123922	1284	forward
gene	2123934	2124686	753	forward
gene	2124775	2125755	981	forward
gene	2125761	2126702	942	forward
gene	2126759	2127988	1230	forward
gene	2128000	2128779	780	forward
gene	2128868	2130340	1473	forward
gene	2130358	2131064	707	forward
gene	2131165	2131914	750	forward
gene	2132253	>2133663	>1411	forward
gene	2134143	2134871	729	reverse
traD gene	2134909	2137068	2160	reverse
gene	2137078	2137584	507	reverse
gene	2137581	2138129	549	reverse
gene	2138111	2138830	720	reverse
gene	2138840	2139511	672	reverse
gene	2139508	2140050	543	reverse
gene	2140157	2140903	747	reverse
gene	2140956	2141450	495	reverse
gene	2141551	2141808	258	reverse
gene	2141880	2142464	585	reverse
gene	2143376	2145343	1968	reverse
gene	2145565	2146035	471	reverse
gene	2146032	2146550	519	reverse
gene	2146547	2147302	756	reverse
gene	2147510	2148700	1191	reverse
gene	2148697	2149245	549	reverse
gene	2149242	2150828	1587	reverse
gene	2150843	2151052	210	reverse
gene	2151138	2151980	843	reverse
gene	2151985	2152215	231	reverse
gene	2152325	2153080	756	reverse
gene	2153346	2153999	654	reverse
gene	2154127	2155224	1098	reverse
gene	2155341	2156261	921	forward
gene	2156249	2157442	1194	reverse
[truncated: 4,181 more rows]
