# Supplementary material for: The birth of a bacterial tRNA gene by large-scale, tandem duplication events
Source: eLife. 2020 Oct 30;9:e57947. doi: 10.7554/eLife.57947 (PMC7661048; doi:10.7554/eLife.57947)
Supplement: Supplementary file 5. — This file contains details of the raw read numbers of proportions of the dominant base called at SBW25 chromosome positions 4,163,616–4,163,861 in strains W1-L, W3-L (each carrying one serTGA copy), M1-L, M2-L, M2-Lop, M3-L, and M4-L (each carrying two serTGA copies). This 245 bp segment encompasses the serTGA gene and ~155 bp of the upstream region, which is expected to contain the serTGA promoter. Any point mutation in either serTGA copy in the duplication strains (M1-L, M2-L, M2-Lop, M3-L, and M4-L) is expected to be reflected by a drop in the proportion of the dominant base (to around 0.5). For example, if in M1-L one serTGA copy had gained a C→T point mutation in tRNA position 34 (i.e., an anticodon switch event; see Discussion), one would expect approximately half the 214 reads covering base 4,163,669 to contain a T, and the other half to carry a C. Therefore, the dominant base proportion would be expected to drop to ~0.5. No evidence was found of any mutations in any copy of serTGA or its promoter; all 245 bp were covered by a minimum of 127 reads in each duplication strain, with at least 94% of reads at each position carrying the dominant base. [file elife-57947-supp5.xlsx]

## Sheet: Sheet1
This file contains detailed information on the NGS data for each evolved isolate across the serTGA gene and promoter region. In particular, we are checking that there are no polymorphisms detected in the duplication strains. Notably, a mutation in either copy of the duplicated region would only be expected to show as a 50% SNP. Therefore, we checked every base in the serTGA gene and promoter, in …
Highlighting denotes important elements of the sequence (left hand column). The tRNA gene was predicted using GtRNAdb 2.0 (Chan and Lowe, 2016), while the promoter elements were predicted using BPROM (Solovyev and Salamov, 2011; https://doi.org/10.1371/journal.pone.0090603)
Sequence information				Evolved isolate
genomic element	base_number(leading)	base(leading)	base(lagging)	W1-L (mean genome cov=120.3)		W3-L (mean genome cov=111.5)		M1-L (mean genome cov=103)		M2-Lop (mean genome cov=117.2)		M2-L (mean genome cov=125.9)		M3-L (mean genome cov=117.5)		M4-L (mean genome cov=98.1)
				coverage	proportion_leading_base (2 dp)	coverage	proportion_leading_base (2 dp)	coverage	proportion_leading_base (2 dp)	coverage	proportion_leading_base (2 dp)	coverage	proportion_leading_base (2 dp)	coverage	proportion_leading_base (2 dp)	coverage	proportion_leading_base (2 dp)	Notes
serTGA	4163615	T	A	89	1	96	0.98	209	1	172	1	227	1	187	1	164	0.98
serTGA	4163616	G	C	89	0.98	96	1	209	1	172	0.98	227	1	187	0.99	164	0.99
serTGA	4163617	G	C	89	1	96	1	209	1	173	1	226	1	187	0.98	164	0.99
serTGA	4163618	C	G	88	1	94	0.98	209	1	166	1	222	1	186	1	162	0.99
serTGA	4163619	G	C	88	1	94	1	209	1	166	1	221	1	186	1	161	1
serTGA	4163620	G	C	89	0.98	94	1	209	0.98	165	0.99	221	0.99	186	1	161	1
serTGA	4163621	G	C	91	0.98	96	1	214	0.99	165	0.99	221	1	189	0.99	161	1
serTGA	4163622	A	T	91	0.98	98	1	220	1	167	1	223	1	194	1	163	1
serTGA	4163623	A	T	91	1	97	0.98	220	0.99	168	0.99	223	0.99	194	1	164	1
serTGA	4163624	A	T	92	1	98	0.98	223	0.99	168	0.99	226	1	198	1	165	1
serTGA	4163625	C	G	96	1	98	0.98	225	0.98	168	1	226	1	200	0.99	167	1
serTGA	4163626	C	G	96	1	98	0.98	225	1	168	1	226	1	199	1	167	1
serTGA	4163627	A	T	96	0.96	98	1	225	1	167	1	226	1	198	1	167	0.99
serTGA	4163628	G	C	96	0.98	98	1	225	0.99	167	0.99	226	1	198	1	167	1
serTGA	4163629	G	C	95	1	97	1	221	1	164	0.99	223	0.99	197	0.99	166	0.99
serTGA	4163630	G	C	95	1	98	0.98	224	0.98	165	0.99	224	1	198	1	166	0.99
serTGA	4163631	A	T	95	1	98	1	223	1	165	1	222	0.99	197	0.99	167	1
serTGA	4163632	T	A	96	0.98	101	1	228	0.98	168	1	225	1	204	0.98	169	1
serTGA	4163633	T	A	96	0.98	101	1	228	0.99	168	0.99	223	1	204	1	168	1
serTGA	4163634	C	G	100	1	106	1	234	1	176	1	241	1	209	1	171	1
serTGA	4163635	G	C	100	1	106	1	234	0.99	176	1	243	1	209	0.99	171	1
serTGA	4163636	A	T	100	0.98	106	0.98	235	0.98	176	0.99	243	0.98	209	0.99	170	1
serTGA	4163637	A	T	100	0.94	105	1	237	0.97	176	0.98	242	0.98	208	0.99	168	0.98
serTGA	4163638	C	G	101	1	105	1	240	1	180	1	243	0.99	211	1	171	1
serTGA	4163639	C	G	101	1	104	1	239	0.96	181	1	242	0.99	208	1	169	0.99
serTGA	4163640	C	G	103	1	103	1	235	1	176	0.98	238	0.99	207	0.98	170	1
serTGA	4163641	T	A	103	1	102	0.94	235	1	175	0.98	237	1	207	0.98	171	1
serTGA	4163642	G	C	103	1	102	0.96	235	0.98	174	1	237	0.99	207	1	171	1
serTGA	4163643	G	C	103	1	102	1	235	0.99	174	1	238	1	207	0.99	171	1
serTGA	4163644	A	T	102	1	101	1	237	1	172	1	236	0.99	207	1	170	0.99
serTGA	4163645	G	C	102	1	100	0.98	237	0.99	172	1	236	0.99	204	0.99	169	0.99
serTGA	4163646	A	T	93	0.96	91	0.98	217	0.99	157	0.97	214	0.98	191	0.97	160	1
serTGA	4163647	C	G	93	1	91	1	215	1	155	1	207	0.99	189	0.99	153	1
serTGA	4163648	G	C	93	1	91	1	214	0.99	155	1	206	0.99	189	1	152	0.99
serTGA	4163649	C	G	100	1	95	1	229	0.99	171	0.99	215	0.99	199	1	165	1
serTGA	4163650	T	A	100	1	95	0.98	230	0.99	170	0.99	215	0.99	199	0.99	165	1
serTGA	4163651	A	T	105	0.98	97	1	233	0.98	178	0.99	224	0.99	210	0.98	166	0.99
serTGA	4163652	T	A	105	0.98	97	0.98	233	1	178	1	224	0.98	210	0.98	166	1
serTGA	4163653	T	A	105	1	97	1	234	0.98	180	1	225	1	212	0.98	166	1
serTGA	4163654	A	T	105	1	97	1	233	0.99	180	0.99	224	1	212	0.99	166	1
serTGA	4163655	A	T	109	0.98	98	1	236	1	184	1	231	0.99	215	1	168	1
serTGA	4163656	C	G	109	1	98	1	230	1	182	1	231	0.99	212	0.99	165	1
serTGA	4163657	G	C	109	1	98	1	230	0.99	181	1	230	0.99	212	0.99	165	1
serTGA	4163658	T	A	98	1	90	1	218	0.99	170	0.98	224	0.99	197	1	150	1
serTGA	4163659	C	G	94	1	84	1	211	1	166	0.99	211	0.98	192	1	144	1
serTGA	4163660	C	G	93	1	81	0.98	207	1	165	1	209	0.99	189	1	141	1
serTGA	4163661	G	C	93	1	81	1	207	0.98	165	1	209	0.99	189	0.99	141	0.99
serTGA	4163662	C	G	94	1	81	1	208	0.99	165	0.99	209	1	189	1	141	1
serTGA	4163663	C	G	94	1	80	1	208	0.99	164	1	208	1	189	1	141	1
serTGA	4163664	G	C	94	1	80	0.98	207	1	164	0.99	208	0.99	189	0.99	141	1
serTGA	4163665	G	C	97	1	78	1	209	1	169	0.99	209	1	191	0.99	142	1
serTGA	4163666	T	A	96	1	77	1	209	0.98	169	0.99	209	1	192	0.97	143	0.99
serTGA	4163667	T	A	97	1	78	1	211	0.99	173	0.99	210	1	194	0.98	146	1
serTGA	4163668	T	A	97	0.96	79	1	208	1	172	1	209	1	192	0.98	143	1
anticodon (position 36)	4163669	T	A	104	1	83	1	214	0.99	184	1	221	0.99	202	0.98	150	0.99
anticodon (position 33)	4163670	C	G	103	1	82	1	215	0.97	183	1	221	1	201	0.99	149	1
anticodon (position 34)	4163671	A	T	103	1	82	1	215	1	183	1	221	1	201	0.99	149	1	*Note: no sign of t-->c anticodon switching in any serTGA copy of any isolate
serTGA	4163672	A	T	103	1	82	1	217	0.99	182	0.99	221	1	202	1	149	1
serTGA	4163673	G	C	102	0.98	82	0.95	215	1	181	1	221	1	204	0.95	150	1
serTGA	4163674	A	T	102	0.98	81	1	215	0.98	178	0.99	216	0.98	198	0.98	149	1
serTGA	4163675	C	G	102	1	79	1	211	1	177	1	214	1	200	1	148	1
serTGA	4163676	C	G	102	0.98	79	1	208	1	175	1	212	1	195	0.98	143	1
serTGA	4163677	G	C	102	1	80	0.98	208	0.99	174	0.97	211	1	196	1	145	1
serTGA	4163678	G	C	102	1	83	1	210	0.98	178	1	212	1	196	0.99	146	1
serTGA	4163679	T	A	102	0.98	82	1	210	0.99	179	0.99	212	0.97	196	0.99	145	0.99
serTGA	4163680	G	C	104	1	83	1	209	1	182	0.99	219	0.99	199	0.95	145	1
serTGA	4163681	C	G	104	1	83	1	208	0.99	185	0.99	220	1	198	1	143	0.99
serTGA	4163682	A	T	104	0.98	82	1	209	0.99	185	0.98	221	1	197	0.99	143	1
serTGA	4163683	T	A	107	0.96	82	0.98	211	0.99	190	1	224	1	200	0.97	148	1
serTGA	4163684	T	A	107	1	81	0.98	211	1	190	1	224	0.99	199	0.99	148	1
serTGA	4163685	C	G	108	1	80	0.98	212	0.99	193	0.99	222	0.99	199	0.99	150	0.97
serTGA	4163686	A	T	108	0.98	80	0.98	208	0.99	193	1	219	1	199	1	149	0.99
serTGA	4163687	A	T	108	0.98	80	0.98	208	0.99	194	1	218	1	198	1	149	1
serTGA	4163688	C	G	103	1	76	1	198	0.99	188	0.99	212	1	189	1	144	1
serTGA	4163689	C	G	98	1	73	1	192	1	179	1	200	1	181	1	138	0.99
serTGA	4163690	A	T	97	0.98	73	1	191	0.98	178	1	200	0.99	182	0.99	138	0.99
serTGA	4163691	C	G	96	1	70	1	188	1	177	1	199	1	181	1	135	0.99
serTGA	4163692	T	A	98	1	67	1	184	1	179	1	200	1	181	0.98	134	0.97
serTGA	4163693	C	G	96	1	67	0.97	184	0.99	178	0.99	200	0.99	176	1	130	1
serTGA	4163694	T	A	95	1	67	1	181	0.99	176	0.99	196	0.99	169	1	127	0.98
serTGA	4163695	G	C	95	1	68	1	181	1	177	0.99	197	1	171	1	127	1
serTGA	4163696	C	G	95	0.98	68	1	181	1	177	1	197	1	171	1	127	1
serTGA	4163697	C	G	96	0.98	69	0.97	182	0.99	177	0.99	197	1	171	1	127	1
serTGA	4163698	A	T	96	1	69	1	183	1	178	1	201	1	172	1	130	1
serTGA	4163699	A	T	96	1	69	1	182	1	176	1	201	1	172	1	130	1
serTGA	4163700	T	A	95	0.98	73	1	181	0.97	180	1	202	1	175	1	130	0.97
serTGA	4163701	T	A	95	1	72	1	180	0.98	180	1	201	1	175	0.99	130	1
serTGA	4163702	T	A	95	1	72	1	179	1	181	1	200	1	175	1	130	1
serTGA	4163703	C	G	95	1	72	0.97	183	0.98	183	0.98	200	1	177	1	132	1
serTGA	4163704	C	G	95	0.98	70	1	181	1	181	1	199	1	177	1	130	1
serTGA	4163705	C	G	95	0.98	68	0.97	180	1	179	1	198	1	174	1	128	1
intergenic	4163706	T	A	97	1	69	1	182	0.98	182	0.99	203	1	176	0.99	132	1
intergenic	4163707	T	A	97	1	69	1	181	1	183	1	203	1	175	1	132	1
intergenic	4163708	G	C	97	1	69	1	181	0.99	183	1	204	1	176	1	133	1
intergenic	4163709	T	A	96	1	70	1	184	1	182	0.99	205	0.99	175	1	133	1
intergenic	4163710	G	C	96	1	70	1	185	1	181	0.98	205	1	175	1	133	1
intergenic	4163711	C	G	97	1	69	1	189	1	181	1	207	0.99	174	1	135	1
intergenic	4163712	G	C	96	1	67	0.97	186	0.99	181	0.99	204	0.99	173	1	133	1
intergenic	4163713	T	A	96	1	69	1	187	0.99	181	1	205	1	174	1	133	0.99
intergenic	4163714	C	G	96	0.98	69	1	186	1	181	1	205	1	174	0.99	133	1
intergenic	4163715	A	T	96	1	69	0.97	186	1	181	1	205	0.99	174	1	133	1
intergenic	4163716	C	G	96	1	69	1	186	1	182	1	205	1	175	1	133	1
intergenic	4163717	G	C	96	1	69	1	186	1	182	1	205	1	174	0.99	133	0.99
intergenic	4163718	A	T	96	1	69	1	188	1	184	1	207	1	177	1	132	1
intergenic	4163719	G	C	101	1	73	1	198	1	191	1	217	1	189	0.99	145	1
intergenic	4163720	A	T	101	1	74	1	198	1	189	1	219	1	189	0.99	145	1
intergenic	4163721	T	A	101	1	74	1	199	1	191	1	219	1	189	0.99	144	1
sigma factor	4163722	T	A	102	1	75	1	200	1	193	1	220	0.99	189	1	144	0.99
sigma factor	4163723	A	T	105	1	78	0.97	207	1	198	1	227	1	196	1	149	0.99
sigma factor	4163724	T	A	105	1	78	1	207	1	201	1	227	0.99	196	0.99	151	1
sigma factor	4163725	A	T	107	1	78	1	208	1	201	0.99	226	1	196	1	151	0.99
sigma factor	4163726	A	T	107	0.98	78	0.97	208	1	201	0.99	226	1	196	1	151	1
sigma factor	4163727	T	A	108	1	84	1	210	0.98	208	0.99	240	0.96	211	0.99	166	0.98
sigma factor	4163728	A	T	104	1	80	1	199	1	209	1	230	1	200	0.99	157	0.99
sigma factor	4163729	G	C	104	1	78	1	200	1	209	1	232	0.99	201	1	157	0.99
intergenic	4163730	C	G	105	1	78	1	200	1	212	0.99	234	1	203	1	158	1
intergenic	4163731	C	G	105	1	78	1	200	1	212	1	234	1	203	0.99	158	1
intergenic	4163732	C	G	104	0.98	76	0.97	195	1	207	0.99	231	1	203	1	154	0.99
intergenic	4163733	A	T	103	1	76	1	194	0.98	207	1	229	0.99	202	0.99	153	1
intergenic	4163734	T	A	103	0.96	76	1	194	0.99	207	0.99	230	0.98	202	0.99	155	0.96
intergenic	4163735	C	G	98	0.98	74	1	191	1	196	1	225	1	195	1	151	1
intergenic	4163736	C	G	98	1	74	1	192	1	196	1	225	1	196	1	151	1
intergenic	4163737	C	G	97	1	74	1	191	0.99	196	0.99	230	1	197	0.99	154	1
intergenic	4163738	G	C	98	1	76	1	190	0.99	197	0.99	230	1	196	0.99	153	1
intergenic	4163739	T	A	98	1	76	0.97	194	0.99	199	0.98	234	1	197	0.99	155	0.99
intergenic	4163740	C	G	98	1	76	1	193	0.99	199	0.99	234	1	197	1	154	1
intergenic	4163741	T	A	98	1	74	1	192	1	198	1	231	0.97	197	0.99	155	1
intergenic	4163742	C	G	98	1	74	1	192	1	198	0.99	231	1	197	1	155	1
intergenic	4163743	A	T	98	1	74	1	190	0.99	198	1	229	1	195	1	155	0.97
intergenic	4163744	G	C	98	1	74	0.97	190	1	198	1	229	1	195	1	155	1
intergenic	4163745	C	G	98	0.98	74	0.97	191	1	199	0.99	233	1	198	0.97	156	1
intergenic	4163746	G	C	98	1	74	0.97	191	1	199	1	231	1	198	0.99	155	1
intergenic	4163747	G	C	98	1	73	1	190	1	198	1	228	1	193	1	151	0.99
intergenic	4163748	G	C	98	1	73	1	190	1	200	1	228	1	193	0.99	151	0.99
intergenic	4163749	C	G	101	1	75	1	191	1	205	1	227	1	198	0.99	154	1
intergenic	4163750	G	C	101	1	75	1	191	1	205	0.99	227	1	198	0.99	154	1
intergenic	4163751	C	G	105	0.98	76	1	202	1	216	1	235	1	204	1	158	1
intergenic	4163752	C	G	104	1	75	1	201	0.99	215	1	235	1	204	1	157	1
minus 10 box	4163753	A	T	104	1	78	1	206	1	222	1	240	1	211	1	163	0.98
minus 10 box	4163754	T	A	104	1	78	1	206	0.97	223	0.98	238	1	210	1	163	0.98
minus 10 box	4163755	A	T	102	1	77	1	208	0.99	221	1	237	1	207	1	163	0.99
minus 10 box	4163756	A	T	102	1	77	1	208	1	220	1	238	1	208	0.99	162	1
minus 10 box	4163757	T	A	102	1	77	1	208	0.98	219	0.99	237	0.98	208	0.97	162	0.99
minus 10 box	4163758	A	T	102	0.98	77	1	206	1	221	1	237	0.99	210	1	162	1
minus 10 box	4163759	C	G	102	1	77	1	206	1	221	1	237	1	210	1	162	1
minus 10 box	4163760	C	G	99	1	75	1	198	0.99	215	1	228	1	203	0.99	157	1
minus 10 box	4163761	C	G	97	1	75	1	195	1	214	0.99	227	1	202	1	157	1
intergenic	4163762	G	C	97	1	77	1	195	1	213	0.99	227	0.99	201	0.99	162	0.99
intergenic	4163763	A	T	100	1	83	1	199	1	215	1	230	1	204	0.99	167	1
intergenic	4163764	A	T	100	0.98	83	1	199	0.99	217	1	234	0.99	206	1	169	1
intergenic	4163765	T	A	100	0.98	83	1	199	1	217	1	234	1	206	0.99	169	1
intergenic	4163766	G	C	102	1	83	1	200	1	222	1	237	0.99	209	1	172	1
intergenic	4163767	A	T	102	1	83	1	202	1	222	1	237	1	209	1	174	0.99
intergenic	4163768	A	T	102	0.98	83	0.98	202	0.99	220	1	237	0.99	208	1	173	1
intergenic	4163769	A	T	103	0.98	83	1	203	0.99	220	0.99	237	1	208	1	172	1
intergenic	4163770	C	G	102	1	83	1	203	1	220	1	237	0.99	208	0.99	172	1
intergenic	4163771	A	T	101	1	81	1	200	1	220	1	237	1	204	1	171	1
intergenic	4163772	C	G	101	0.98	81	0.98	196	1	220	1	237	0.99	203	1	170	1
intergenic	4163773	A	T	101	1	79	1	192	0.99	218	0.99	235	1	199	1	169	1
intergenic	4163774	C	G	106	0.98	81	1	195	1	222	0.99	242	1	205	1	170	0.99
minus 35 box	4163775	T	A	105	1	80	1	192	1	220	0.99	239	1	200	0.98	167	0.98
minus 35 box	4163776	G	C	109	0.98	85	1	200	0.99	227	0.99	251	1	207	1	172	1
minus 35 box	4163777	T	A	109	0.98	85	1	200	1	227	1	251	1	207	1	172	0.98
minus 35 box	4163778	C	G	109	1	85	0.98	200	1	227	1	251	1	207	0.99	172	0.99
minus 35 box	4163779	A	T	111	0.98	86	1	200	0.98	229	1	253	1	209	0.99	172	1
minus 35 box	4163780	A	T	111	1	86	1	200	1	228	0.99	253	1	209	0.99	172	1
intergenic	4163781	A	T	111	0.96	86	0.98	198	1	229	1	252	0.99	209	0.98	172	0.99
intergenic	4163782	C	G	110	1	87	1	197	1	228	0.99	251	1	208	0.98	171	1
intergenic	4163783	T	A	107	1	84	0.98	193	1	225	1	248	1	201	0.98	169	1
intergenic	4163784	C	G	112	1	85	1	195	1	229	1	249	0.99	202	0.98	174	1
intergenic	4163785	T	A	105	1	80	1	187	1	218	1	231	0.99	195	0.98	168	0.99
intergenic	4163786	C	G	105	1	80	1	187	1	218	1	231	1	196	0.99	168	1
intergenic	4163787	G	C	105	1	80	1	187	1	218	1	231	1	197	1	168	0.99
intergenic	4163788	C	G	103	1	80	1	182	0.99	213	1	230	1	194	1	165	1
intergenic	4163789	C	G	102	0.98	80	1	182	0.99	213	0.98	230	1	194	0.98	165	1
intergenic	4163790	A	T	105	1	81	1	189	0.98	216	0.99	232	1	194	1	171	0.99
intergenic	4163791	T	A	106	1	83	1	194	0.99	220	1	242	1	197	1	174	0.97
intergenic	4163792	C	G	116	1	95	1	201	1	234	0.99	252	1	207	1	184	1
intergenic	4163793	G	C	118	1	96	1	205	1	236	1	258	1	215	0.97	190	1
intergenic	4163794	C	G	118	1	96	1	204	1	238	1	260	1	215	0.98	190	1
intergenic	4163795	T	A	118	0.98	95	0.98	204	1	240	1	259	1	215	1	191	0.98
intergenic	4163796	T	A	118	0.98	95	0.98	204	0.98	240	0.99	259	0.99	215	1	192	0.97
intergenic	4163797	G	C	122	1	97	1	206	1	244	0.99	266	1	217	0.99	197	1
intergenic	4163798	T	A	122	1	97	1	206	0.98	242	0.99	266	1	218	1	197	0.99
intergenic	4163799	T	A	122	1	97	1	206	1	242	1	267	0.99	218	0.99	197	1
intergenic	4163800	A	T	115	1	93	0.98	189	0.99	228	0.99	253	0.99	206	1	185	1
intergenic	4163801	C	G	113	1	93	1	186	1	228	1	252	0.99	202	0.99	185	1
intergenic	4163802	A	T	109	1	91	1	185	1	220	1	244	1	195	1	184	1
intergenic	4163803	G	C	110	1	91	1	185	1	221	1	244	0.99	195	1	185	1
intergenic	4163804	A	T	111	1	92	1	187	1	220	0.98	244	1	195	0.98	186	1
intergenic	4163805	G	C	111	1	92	1	187	1	222	1	245	0.99	195	1	188	1
intergenic	4163806	C	G	107	0.98	91	1	185	1	219	0.99	238	1	193	0.99	189	1
intergenic	4163807	G	C	106	1	91	1	186	0.99	219	1	238	1	193	1	189	1
intergenic	4163808	T	A	109	1	99	0.98	193	1	233	0.99	258	0.99	204	1	198	0.99
intergenic	4163809	C	G	109	1	99	0.98	194	1	233	1	257	1	204	0.98	198	1
intergenic	4163810	T	A	109	1	99	1	194	0.99	233	1	257	0.99	204	1	198	1
intergenic	4163811	G	C	117	1	101	1	207	0.98	247	1	272	1	218	1	211	1
intergenic	4163812	T	A	116	1	102	1	206	0.99	245	1	272	0.99	218	0.99	211	0.98
intergenic	4163813	T	A	117	1	102	0.98	207	1	247	0.98	274	0.97	219	0.99	212	1
intergenic	4163814	A	T	117	0.98	102	1	207	0.99	246	1	274	1	219	0.99	212	0.99
intergenic	4163815	T	A	116	1	102	1	208	0.98	242	1	273	0.99	218	1	212	0.99
intergenic	4163816	G	C	115	1	102	1	206	1	242	0.99	271	1	216	0.99	210	1
intergenic	4163817	A	T	115	1	103	0.98	207	0.99	243	1	271	1	216	1	209	0.99
intergenic	4163818	T	A	113	1	102	1	204	1	239	1	271	0.99	212	1	208	0.99
intergenic	4163819	C	G	113	1	102	1	204	1	239	1	272	1	215	0.99	209	1
intergenic	4163820	T	A	106	1	97	1	196	0.99	226	1	261	1	203	1	201	1
intergenic	4163821	T	A	106	1	97	1	196	1	226	1	261	0.98	203	1	201	1
intergenic	4163822	T	A	106	1	97	1	196	1	226	1	261	0.99	203	1	201	1
intergenic	4163823	G	C	106	1	97	1	194	0.99	226	1	261	1	202	1	201	1
intergenic	4163824	C	G	106	0.98	97	1	195	0.99	228	1	263	0.99	203	0.99	200	1
intergenic	4163825	G	C	106	1	97	1	195	0.98	228	1	263	1	203	1	200	1
intergenic	4163826	A	T	105	1	97	0.98	195	0.99	228	0.98	263	1	205	0.99	199	1
intergenic	4163827	C	G	105	1	95	1	194	0.99	227	0.99	262	1	204	1	197	0.99
intergenic	4163828	T	A	106	1	97	1	194	1	229	1	269	1	212	1	199	1
intergenic	4163829	G	C	107	1	97	1	195	1	229	1	269	0.99	213	0.99	199	1
intergenic	4163830	A	T	109	1	97	1	196	0.99	228	0.99	270	1	213	1	200	0.99
intergenic	4163831	A	T	107	1	95	1	195	1	225	1	263	1	209	0.99	200	1
intergenic	4163832	C	G	107	1	95	1	195	1	223	0.98	261	1	209	1	200	1
intergenic	4163833	G	C	107	1	95	1	194	1	222	0.99	260	0.99	209	1	200	1
intergenic	4163834	T	A	105	1	96	1	197	0.98	218	1	260	0.98	207	1	197	0.98
intergenic	4163835	T	A	105	1	96	0.96	197	1	218	0.99	260	0.99	208	0.99	197	0.98
intergenic	4163836	T	A	104	1	95	1	192	1	216	1	258	1	208	0.99	194	0.99
intergenic	4163837	C	G	104	1	95	1	192	0.99	217	1	259	1	208	1	194	1
intergenic	4163838	A	T	104	1	95	1	192	1	216	0.99	260	0.99	207	0.99	194	1
intergenic	4163839	A	T	104	1	95	1	192	1	216	1	260	1	207	0.99	194	1
intergenic	4163840	A	T	103	0.98	95	1	193	0.99	217	0.99	260	0.99	208	0.99	194	0.99
intergenic	4163841	A	T	104	0.98	95	1	193	1	217	0.97	260	1	207	1	194	1
intergenic	4163842	C	G	104	1	96	1	197	0.99	218	0.99	264	1	210	0.99	197	0.98
IR48	4163843	C	G	102	1	96	1	195	1	217	0.99	259	1	207	0.99	195	0.99
IR48	4163844	G	C	102	1	96	1	197	0.99	217	1	259	0.99	208	1	195	0.99
IR48	4163845	A	T	102	1	96	1	199	0.99	219	1	260	1	208	0.97	196	1
IR48	4163846	A	T	102	1	95	1	199	1	218	0.99	259	1	206	0.99	196	0.99
IR48	4163847	G	C	102	1	95	1	199	1	218	1	259	0.99	207	1	197	0.99
IR48	4163848	G	C	102	1	95	1	200	0.98	219	1	262	1	209	1	200	1
IR48	4163849	A	T	102	1	98	0.98	201	1	219	0.99	260	1	209	1	198	0.99
IR48	4163850	G	C	103	1	99	1	202	1	221	1	268	1	212	1	202	1
IR48	4163851	T	A	106	1	100	1	202	0.99	218	0.99	270	0.99	209	0.99	205	1
IR48	4163852	G	C	107	1	100	1	202	1	219	1	271	1	211	0.99	205	1
IR48	4163853	T	A	107	1	100	1	203	0.98	219	0.99	271	1	211	0.98	205	0.98
IR48	4163854	C	G	106	1	100	1	200	0.99	216	1	271	0.99	209	1	203	1
IR48	4163855	G	C	106	1	100	1	200	1	216	1	271	1	209	1	203	1
IR48	4163856	C	G	106	0.96	101	1	200	0.99	217	1	271	0.99	210	0.98	203	1
IR48	4163857	C	G	104	1	101	1	198	0.99	214	1	268	1	208	0.99	199	1
IR48 and yccA	4163858	A	T	104	1	101	1	198	1	214	1	268	1	208	1	200	1
IR48 and yccA	4163859	T	A	104	1	100	1	193	0.99	213	0.99	265	1	207	0.99	198	0.99
IR48 and yccA	4163860	G	C	104	1	101	1	193	1	213	1	265	0.99	208	1	198	1
IR48 and yccA	4163861	C	G	103	0.98	101	1	190	1	213	1	263	0.98	209	1	196	1
