# Supplementary material for: The birth of a bacterial tRNA gene by large-scale, tandem duplication events
Source: eLife. 2020 Oct 30;9:e57947. doi: 10.7554/eLife.57947 (PMC7661048; doi:10.7554/eLife.57947)
Supplement: Supplementary file 7. — The first tab contains index details and a summary of the raw YAMAT-seq reads (GEO accession number GSE144791; Edgar et al., 2002) for each of the 27 samples (three replicates of nine strains): a minimum of 636,995 reads of the expected size (80–151 bp) was obtained per sample. In each case, between 86.4% and 93.0% of these aligned to the list of 42x reference SBW25 tRNA sequences (provided in Supplementary file 6). The subsequent nine tabs contain the YAMAT-seq data for each of the nine strains tested (SBW25, ΔserCGA-1, ΔserCGA-2, W1-L, M1-L, M2-L, M2-Lop, M3-L, and M4-L). Each tab contains (i) the numbers of reads for 42 reference tRNAs, for three replicates (left), (ii) numbers of reference reads for 39 tRNA types in SBW25 (e.g., tRNA-Asn-GTT is the sum of reference sequences 7_Asn-GTT-1–1 and 8_Asn-GTT-2–1; middle), (iii) the proportion of each tRNA type in the mature tRNA pool for each of the three samples (right), and (iv) a scatter plot of the YAMAT-seq proportions versus the proportion of the tRNA gene set encoding the tRNA type. Blue = tRNA-Ser(CGA), green = tRNA-Ser(UGA). The final tab contains information regarding the unused reads for each sample. [file elife-57947-supp7.xlsx]

## Sheet: summary
YAMAT-seq data showing a rise in tRNA-Ser(UGA) expression in each of the five duplication isolates. The first tab contains index details and a summary of the raw YAMAT-seq reads (GEO accession number GSE144791; Sayers et al., 2019) for each of 27 samples (3 replicates of 9 strains): a minimum of 636,995 reads of the expected size (80-151 bp) was obtained per sample. In each case, between 86.4 % a…
Demultiplexed Illumina reads sorted according to 27 indices (0 mismatches allowed in each 6-bp index seqeunce). Each resulting .fasta.gz file was read into Geneious (v11.1.4) without pairing, extracted 80-151 bp reads, aligned to 42 unique SBW25 primary sequences (10 % mismatch/gap rate, max 2-bp gap size, max. 5 ambiguities; no iterations, don't map if equal match)
sample	index_name	index_group	index_seq	strain	file_names	# raw reads	# reads 80-151 bp	% size retention	# reads aligned to SBW25 tRNAs	#reads unused	%reads_aligned	#contigs	notes
1	RPI1	A	ATCACG	SBW25	1_S1_R1_001.fastq.gz	850294	850262	99.9962	791053	59209	93.0364	41	Missing contig is: Cys-GCA-2 (pseudo tRNA)
2	RPI2	A	CGATGT	delserCGA-1	2_S2_R1_001.fastq.gz	1826469	1826357	99.9939	1640300	186057	89.8127	40	Missing contigs are: Ser-CGA (engineered out) and Cys-GCA-2 (pseudo tRNA)
3	RPI3	A	TTAGGC	delserCGA-2	3_S3_R1_001.fastq.gz	831264	831225	99.9953	726427	104798	87.3923	40	Missing contigs are: Ser-CGA (engineered out) and Cys-GCA-2 (pseudo tRNA)
4	RPI4	A	TGACCA	M1-L	4_S4_R1_001.fastq.gz	1080271	1080226	99.9958	971928	108298	89.9745	41	Missing contig is: Cys-GCA-2 (pseudo tRNA); Ser-CGA has 1 read
5	RPI5	A	ACAGTG	M2-Lop	5_S5_R1_001.fastq.gz	1245661	1245605	99.9955	1122777	122828	90.1391	41	Missing contig is: Cys-GCA-2 (pseudo tRNA); Ser-CGA has 1 read
6	RPI6	A	GCCAAT	M2-L	6_S6_R1_001.fastq.gz	987461	987315	99.9852	862943	124372	87.403	41	Missing contig is: Cys-GCA-2 (pseudo tRNA); Ser-CGA has 3 reads
7	RPI7	A	CAGATC	M3-L	7_S7_R1_001.fastq.gz	1169514	1169400	99.9903	1053797	115603	90.1143	41	Missing contig is: Cys-GCA-2 (pseudo tRNA); Ser-CGA has 3 reads
8	RPI8	A	ACTTGA	M4-L	8_S8_R1_001.fastq.gz	1390933	1390782	99.9891	1251838	138944	90.0096	40	Missing contigs are: Ser-CGA (engineered out) and Cys-GCA-2 (pseudo tRNA)
9	RPI9	A	GATCAG	W1-L	9_S9_R1_001.fastq.gz	1096077	1095972	99.9904	977778	118194	89.2156	41	Missing contig is: Cys-GCA-2 (pseudo tRNA)
10	RPI10	A	TAGCTT	SBW25	10_S10_R1_001.fastq.gz	1264665	1264603	99.9951	1149738	114824	90.9169	41	Missing contig is: Cys-GCA-2 (pseudo tRNA)
11	RPI11	A	GGCTAC	delserCGA-1	11_S11_R1_001.fastq.gz	828952	828904	99.9942	750790	78114	90.5762	41	Missing contig is: Cys-GCA-2 (pseudo tRNA); Ser-CGA has 1 read
12	RPI12	A	CTTGTA	delserCGA-2	12_S12_R1_001.fastq.gz	1144409	1144328	99.9929	1037144	107184	90.6335	41	Missing contig is: Cys-GCA-2 (pseudo tRNA); Ser-CGA has 3 reads
13	RPI13	B	AGTCAA	M1-L	13_S13_R1_001.fastq.gz	746154	746121	99.9956	658925	87196	88.3134	40	Missing contigs are: Ser-CGA (engineered out) and Cys-GCA-2 (pseudo tRNA)
14	RPI14	B	AGTTCC	M2-Lop	14_S14_R1_001.fastq.gz	660410	660372	99.9942	596282	64090	90.2949	40	Missing contigs are: Ser-CGA (engineered out) and Cys-GCA-2 (pseudo tRNA)
15	RPI15	B	ATGTCA	M2-L	15_S15_R1_001.fastq.gz	637037	636995	99.9934	571607	65338	89.7349	40	Missing contigs are: Ser-CGA (engineered out) and Cys-GCA-2 (pseudo tRNA)
16	RPI25	C	ACTGAT	M3-L	16_S16_R1_001.fastq.gz	1468997	1468878	99.9919	1327201	141677	90.3547	40	Missing contigs are: Ser-CGA (engineered out) and Cys-GCA-2 (pseudo tRNA)
17	RPI26	C	ATGAGC	M4-L	17_S17_R1_001.fastq.gz	1179784	1179736	99.9959	1058882	120854	89.7558	41	Missing contig is: Cys-GCA-2 (pseudo tRNA); Ser-CGA has 1 read
18	RPI27	C	ATTCCT	W1-L	18_S18_R1_001.fastq.gz	1533387	1533319	99.9956	1376981	156338	89.8039	41	Missing contig is: Cys-GCA-2 (pseudo tRNA)
19	RPI28	C	CAAAAG	SBW25	19_S19_R1_001.fastq.gz	1529115	1529019	99.9937	1321608	207411	86.435	41	Missing contig is: Cys-GCA-2 (pseudo tRNA)
20	RPI29	C	CAACTA	delserCGA-1	20_S20_R1_001.fastq.gz	1439904	1439822	99.9943	1270317	169505	88.2274	41	Missing contig is: Cys-GCA-2 (pseudo tRNA); Ser-CGA has 2 reads
21	RPI30	C	CACCGG	delserCGA-2	21_S21_R1_001.fastq.gz	834445	834469	100.003	738139	96240	88.4561	40	Missing contigs are: Ser-CGA (engineered out) and Cys-GCA-2 (pseudo tRNA)
22	RPI31	C	CACGAT	M1-L	22_S22_R1_001.fastq.gz	1514438	1514294	99.9905	1354229	160065	89.4297	41	Missing contig is: Cys-GCA-2 (pseudo tRNA); Ser-CGA has 1 read
23	RPI32	C	CACTCA	M2-Lop	23_S23_R1_001.fastq.gz	1548545	1548468	99.995	1380447	168021	89.1492	40	Missing contigs are: Ser-CGA (engineered out) and Cys-GCA-2 (pseudo tRNA)
24	RPI33	C	CAGGCG	M2-L	24_S24_R1_001.fastq.gz	1223779	1223694	99.9931	1080230	143464	88.2762	41	Missing contig is: Cys-GCA-2 (pseudo tRNA); Ser-CGA has 2 reads
25	RPI34	C	CATGGC	M3-L	25_S25_R1_001.fastq.gz	1045460	1045368	99.9912	916009	129359	87.6255	41	Missing contig is: Cys-GCA-2 (pseudo tRNA); Ser-CGA has 1 read
26	RPI35	C	CATTT	M4-L	26_S26_R1_001.fastq.gz	1251479	1251402	99.9938	1117033	134369	89.2625	40	Missing contigs are: Ser-CGA (engineered out) and Cys-GCA-2 (pseudo tRNA)
27	RPI36	C	CCAACA	W1-L	27_S27_R1_001.fastq.gz	1459281	1459175	99.9927	1265836	193339	86.7501	41	Missing contig is: Cys-GCA-2 (pseudo tRNA)
					sum	30937891	30935849	n/a	27579186	3356482	n/a
					mean	1.17734e+06	1.17726e+06	99.9936	1.05075e+06	126507	89.2998

## Sheet: SBW25
In Geneious v 11.1.4: Extract seqeunces 80-151 bp long, align to reference SBW25 (42 unique primary sequences) with no iterations, 10% gaps, 10% mismatch and matching equal reads to neither
SBW25 WT (ancestor for Line W1 and W2)
	Raw reads					Raw reads						Proportions
Primary tRNA	rep1(sample1)	rep2(sample10)	rep3(sample19)		Isotype	rep1(sample1)	rep2(sample10)	rep3(sample19)		Isotype	Gene copy number	Gene set	rep1(sample1)	rep2(sample10)	rep3(sample19)	Mean	SE
Ala-GGC	55533	75165	88630		Ala-GGC	55533	75165	88630		Ala-GGC	2	0.030303	0.070205	0.0653758	0.0670643	0.0675484	0.00141493
Ala-UGC	94863	139040	160338		Ala-UGC	94863	139040	160338		Ala-UGC	5	0.0757576	0.119926	0.120932	0.121324	0.120727	0.000416331
Arg-ACG	40780	88413	84912		Arg-ACG	40780	88413	84912		Arg-ACG	2	0.030303	0.0515542	0.0768984	0.064251	0.0642345	0.00731624
Arg-CCG	4094	8807	8458		Arg-CCG	4094	8807	8458		Arg-CCG	1	0.0151515	0.00517565	0.00766001	0.00639998	0.00641188	0.000717197
Arg-CCU	616	1287	1439		Arg-CCU	616	1287	1439		Arg-CCU	1	0.0151515	0.000778749	0.00111939	0.00108886	0.000995665	0.000108815
Arg-UCU	1283	1942	2437		Arg-UCU	1283	1942	2437		Arg-UCU	1	0.0151515	0.00162197	0.00168908	0.00184402	0.00171836	6.57508e-05
Asn-GUU1	13069	17954	19530		Asn-GUU	15747	21776	23762		Asn-GUU	2	0.030303	0.0199074	0.01894	0.0179802	0.0189425	0.000556348
Asn-GUU2	2678	3822	4232		Asp-GUC	76016	103195	115562		Asp-GUC	4	0.0606061	0.0960997	0.0897552	0.0874432	0.0910994	0.00258772
Asp-GUC	76016	103195	115562		Cys-GCA	13096	17339	21602		Cys-GCA	1	0.0151515	0.016556	0.0150808	0.0163457	0.0159942	0.000460699
Cys-GCA-1	13096	17339	21602		fMet-CAU	2718	8237	8203		fMet-CAU	3	0.0454545	0.0034361	0.00716424	0.00620703	0.00560246	0.00111787
fMet-CAU-1	430	1197	1197		Gln-UUG	770	1085	1480		Gln-UUG	1	0.0151515	0.000973437	0.000943693	0.00111988	0.00101234	5.44538e-05
fMet-CAU-2	2288	7040	7006		Glu-UUC	85	121	110		Glu-UUC	4	0.0606061	0.000107457	0.000105241	8.32345e-05	9.86444e-05	7.73144e-06
Gln-UUG	770	1085	1480		Gly-CCC	5449	6877	8300		Gly-CCC	1	0.0151515	0.00688864	0.00598136	0.00628042	0.00638348	0.00026693
Glu-UUC	85	121	110		Gly-GCC	109963	161388	180253		Gly-GCC	3	0.0454545	0.139016	0.140369	0.136393	0.138593	0.00116707
Gly-CCC	5449	6877	8300		Gly-UCC	16181	22018	24950		Gly-UCC	1	0.0151515	0.0204561	0.0191504	0.0188791	0.0194952	0.000486776
Gly-GCC	109963	161388	180253		His-GUG	473	1251	1107		His-GUG	2	0.030303	0.000597968	0.00108807	0.000837642	0.000841228	0.000141493
Gly-UCC	16181	22018	24950		Ile2-CAU	13	25	28		Ile2-CAU	1	0.0151515	1.64346e-05	2.17441e-05	2.1187e-05	1.97886e-05	1.68466e-06
His-GUG	473	1251	1107		Ile-GAU	41371	56929	72413		Ile-GAU	5	0.0757576	0.0523014	0.0495148	0.0547933	0.0522031	0.00152457
Ile2-CAU	13	25	28		Leu-CAA	24928	26550	33945		Leu-CAA	1	0.0151515	0.0315141	0.0230922	0.0256854	0.0267639	0.00249026
Ile-GAU	41371	56929	72413		Leu-CAG	45490	63455	71942		Leu-CAG	2	0.030303	0.0575086	0.0551908	0.0544369	0.0557121	0.00092424
Leu-CAA	24928	26550	33945		Leu-GAG	1437	2694	2426		Leu-GAG	1	0.0151515	0.00181666	0.00234314	0.0018357	0.0019985	0.000172409
Leu-CAG	45490	63455	71942		Leu-UAA	959	1401	1739		Leu-UAA	1	0.0151515	0.00121237	0.00121854	0.00131586	0.00124892	3.35165e-05
Leu-GAG	1437	2694	2426		Leu-UAG	4495	7253	8946		Leu-UAG	1	0.0151515	0.00568259	0.00630839	0.00676924	0.00625341	0.000314889
Leu-UAA	959	1401	1739		Lys-UUU	71013	91917	119850		Lys-UUU	2	0.030303	0.0897749	0.079946	0.0906878	0.0868029	0.00343855
Leu-UAG	4495	7253	8946		Met-CAU	1970	3693	3891		Met-CAU	1	0.0151515	0.00249048	0.00321204	0.00294423	0.00288225	0.000210588
Lys-UUU	71013	91917	119850		Phe-GAA	23	38	48		Phe-GAA	1	0.0151515	2.90767e-05	3.3051e-05	3.63205e-05	3.28161e-05	2.09441e-06
Met-CAU	1970	3693	3891		Pro-GGG	4653	6758	7579		Pro-GGG	1	0.0151515	0.00588234	0.00587786	0.00573486	0.00583169	4.84308e-05
Phe-GAA	23	38	48		Pro-UGG	1916	2974	3832		Pro-UGG	2	0.030303	0.00242221	0.00258668	0.00289959	0.00263616	0.00014001
Pro-GGG	4653	6758	7579		Ser-CGA	12953	14934	19042		Ser-CGA	1	0.0151515	0.0163752	0.012989	0.0144087	0.014591	0.000981747
Pro-UGG	1916	2974	3832		Ser-GCU	11265	13827	14410		Ser-GCU	1	0.0151515	0.0142413	0.0120262	0.0109037	0.0123904	0.000980517
Ser-CGA	12953	14934	19042		Ser-GGA	6206	7698	9278		Ser-GGA	1	0.0151515	0.00784565	0.00669544	0.00702045	0.00718718	0.000342341
Ser-GCU	11265	13827	14410		Ser-UGA	6023	5456	7012		Ser-UGA	1	0.0151515	0.0076143	0.00474543	0.00530582	0.00588852	0.000877924
Ser-GGA	6206	7698	9278		Thr-CGU	271	425	537		Thr-CGU	1	0.0151515	0.000342599	0.000369649	0.000406336	0.000372861	1.84692e-05
Ser-UGA	6023	5456	7012		Thr-GGU	714	2073	1919		Thr-GGU	1	0.0151515	0.000902641	0.00180302	0.00145206	0.00138591	0.000262013
Thr-CGU	271	425	537		Thr-UGU	6730	15011	15704		Thr-UGU	1	0.0151515	0.00850809	0.013056	0.0118829	0.011149	0.00136319
Thr-GGU	714	2073	1919		Trp-CCA	40823	53553	63726		Trp-CCA	1	0.0151515	0.0516086	0.0465784	0.04822	0.0488023	0.00148098
Thr-UGU	6730	15011	15704		Tyr-GUA	10955	14340	18570		Tyr-GUA	1	0.0151515	0.0138493	0.0124724	0.0140515	0.0134578	0.000496117
Trp-CCA	40823	53553	63726		Val-GAC	22865	36792	41507		Val-GAC	1	0.0151515	0.028906	0.0320003	0.0314074	0.0307713	0.000948198
Tyr-GUA	10955	14340	18570		Val-UAC	36272	64001	71680		Val-UAC	3	0.0454545	0.0458552	0.0556657	0.0542386	0.0519199	0.00306019
Val-GAC	22865	36792	41507			791012	1149738	1321567			66	1	1	1	1	1
Val-UAC	36272	64001	71680
unused	59209	114824	207411
sum used	791012	1149738	1321567
sum total	850221	1264562	1528978
prop used	0.93036	0.909199	0.864347

## Sheet: delserCGA_1
In Geneious v 11.1.4: Extract seqeunces 80-151 bp long, align to reference SBW25 (42 unique primary sequences) with no iterations, 10% gaps, 10% mismatch and matching equal reads to neither
serCGA deletion mutant 1: Line M1 and M2 ancestor
	Raw reads					Raw reads						Proportions
Primary tRNA	rep1(sample2)	rep2(sample11)	rep3(sample20)		Isotype	rep1(sample2)	rep2(sample11)	rep3(sample20)		Isotype	Gene copy number	Gene set	rep1(sample2)	rep2(sample11)	rep3(sample20)	Mean	SE
Ala-GGC	123577	60979	101278		Ala-GGC	123577	60979	101278		Ala-GGC	2	0.0307692	0.075338	0.0812198	0.0797266	0.0787615	0.00176515
Ala-UGC	177282	84867	143283		Ala-UGC	177282	84867	143283		Ala-UGC	5	0.0769231	0.108079	0.113037	0.112793	0.111303	0.00161354
Arg-ACG	112273	68229	75171		Arg-ACG	112273	68229	75171		Arg-ACG	2	0.0307692	0.0684466	0.0908763	0.059175	0.0728326	0.00941047
Arg-CCG	8002	4589	5802		Arg-CCG	8002	4589	5802		Arg-CCG	1	0.0153846	0.00487838	0.00611223	0.00456736	0.00518599	0.000471742
Arg-CCU	1202	628	892		Arg-CCU	1202	628	892		Arg-CCU	1	0.0153846	0.000732793	0.000836452	0.000702187	0.000757144	4.06265e-05
Arg-UCU	2616	1158	2020		Arg-UCU	2616	1158	2020		Arg-UCU	1	0.0153846	0.00159483	0.00154238	0.00159015	0.00157579	1.67601e-05
Asn-GUU1	30931	8609	16502		Asn-GUU	37938	10551	19801		Asn-GUU	2	0.0307692	0.0231287	0.0140532	0.0155874	0.0175898	0.00280465
Asn-GUU2	7007	1942	3299		Asp-GUC	158599	75772	128747		Asp-GUC	4	0.0615385	0.096689	0.100923	0.10135	0.0996541	0.00148767
Asp-GUC	158599	75772	128747		Cys-GCA	25069	11878	25598		Cys-GCA	1	0.0153846	0.0152832	0.0158207	0.0201509	0.0170849	0.00154082
Cys-GCA-1	25069	11878	25598		fMet-CAU	7141	4079	5555		fMet-CAU	3	0.0461538	0.00435347	0.00543294	0.00437292	0.00471978	0.000356626
fMet-CAU-1	1005	641	874		Gln-UUG	1497	734	1009		Gln-UUG	1	0.0153846	0.000912638	0.000977637	0.00079429	0.000894855	5.36694e-05
fMet-CAU-2	6136	3438	4681		Glu-UUC	68	105	178		Glu-UUC	4	0.0615385	4.14558e-05	0.000139853	0.000140123	0.000107144	3.2844e-05
Gln-UUG	1497	734	1009		Gly-CCC	9709	4107	8760		Gly-CCC	1	0.0153846	0.00591904	0.00547024	0.00689592	0.00609506	0.000420864
Glu-UUC	68	105	178		Gly-GCC	248888	118864	197929		Gly-GCC	3	0.0461538	0.151733	0.158319	0.155811	0.155288	0.00191894
Gly-CCC	9709	4107	8760		Gly-UCC	22717	11349	19920		Gly-UCC	1	0.0153846	0.0138493	0.0151161	0.0156811	0.0148822	0.000541583
Gly-GCC	248888	118864	197929		His-GUG	1545	947	973		His-GUG	2	0.0307692	0.000941901	0.00126134	0.000765951	0.00098973	0.000144992
Gly-UCC	22717	11349	19920		Ile2-CAU	39	14	24		Ile2-CAU	1	0.0153846	2.37761e-05	1.8647e-05	1.88929e-05	2.04387e-05	1.67023e-06
His-GUG	1545	947	973		Ile-GAU	74109	29530	61525		Ile-GAU	5	0.0769231	0.0451801	0.0393319	0.0484328	0.0443149	0.00266258
Ile2-CAU	39	14	24		Leu-CAA	35967	12827	32428		Leu-CAA	1	0.0153846	0.0219271	0.0170847	0.0255275	0.0215131	0.00244601
Ile-GAU	74109	29530	61525		Leu-CAG	97117	41232	64016		Leu-CAG	2	0.0307692	0.0592069	0.0549182	0.0503937	0.0548396	0.00254444
Leu-CAA	35967	12827	32428		Leu-GAG	4003	1496	2025		Leu-GAG	1	0.0153846	0.00244041	0.00199257	0.00159409	0.00200902	0.000244449
Leu-CAG	97117	41232	64016		Leu-UAA	2320	1120	2085		Leu-UAA	1	0.0153846	0.00141438	0.00149176	0.00164132	0.00151582	6.66092e-05
Leu-GAG	4003	1496	2025		Leu-UAG	10485	5331	8014		Leu-UAG	1	0.0153846	0.00639212	0.00710052	0.00630866	0.00660044	0.000251201
Leu-UAA	2320	1120	2085		Lys-UUU	135519	59547	117321		Lys-UUU	2	0.0307692	0.0826184	0.0793125	0.0923557	0.0847622	0.00391485
Leu-UAG	10485	5331	8014		Met-CAU	5007	2215	2756		Met-CAU	1	0.0153846	0.00305249	0.00295023	0.00216954	0.00272408	0.000278841
Lys-UUU	135519	59547	117321		Phe-GAA	35	26	24		Phe-GAA	1	0.0153846	2.13376e-05	3.46302e-05	1.88929e-05	2.49536e-05	4.88951e-06
Met-CAU	5007	2215	2756		Pro-GGG	13510	4989	8222		Pro-GGG	1	0.0153846	0.0082363	0.006645	0.0064724	0.0071179	0.000561415
Phe-GAA	35	26	24		Pro-UGG	4925	2481	3749		Pro-UGG	2	0.0307692	0.0030025	0.00330452	0.00295123	0.00308608	0.000110216
Pro-GGG	13510	4989	8222		Ser-CGA	0	1	2		Ser-CGA	0	0	0	1.33193e-06	1.57441e-06	9.6878e-07	4.89422e-07
Pro-UGG	4925	2481	3749		Ser-GCU	22805	9303	15276		Ser-GCU	1	0.0153846	0.0139029	0.0123909	0.0120253	0.0127731	0.000574707
Ser-CGA	0	1	2		Ser-GGA	13761	4811	9057		Ser-GGA	1	0.0153846	0.00838932	0.00640792	0.00712972	0.00730898	0.000578962
Ser-GCU	22805	9303	15276		Ser-UGA	8248	2980	7485		Ser-UGA	1	0.0153846	0.00502835	0.00396915	0.00589223	0.00496324	0.000556098
Ser-GGA	13761	4811	9057		Thr-CGU	397	188	303		Thr-CGU	1	0.0153846	0.000242029	0.000250403	0.000238523	0.000243652	3.52407e-06
Ser-UGA	8248	2980	7485		Thr-GGU	3477	2075	1881		Thr-GGU	1	0.0153846	0.00211973	0.00276376	0.00148073	0.00212141	0.000370378
Thr-CGU	397	188	303		Thr-UGU	17004	9431	12823		Thr-UGU	1	0.0153846	0.0103664	0.0125614	0.0100943	0.0110074	0.000780983
Thr-GGU	3477	2075	1881		Trp-CCA	79186	29616	56794		Trp-CCA	1	0.0153846	0.0482753	0.0394464	0.0447085	0.0441434	0.00256429
Thr-UGU	17004	9431	12823		Tyr-GUA	25761	8758	17326		Tyr-GUA	1	0.0153846	0.0157051	0.011665	0.0136391	0.0136697	0.00116635
Trp-CCA	79186	29616	56794		Val-GAC	55455	19437	37484		Val-GAC	1	0.0153846	0.0338078	0.0258887	0.0295076	0.0297347	0.00228887
Tyr-GUA	25761	8758	17326		Val-UAC	93047	44546	72781		Val-UAC	3	0.0461538	0.0567256	0.0593322	0.0572936	0.0577838	0.000791366
Val-GAC	55455	19437	37484			1640300	750790	1270317			65	1	1	1	1	1
Val-UAC	93047	44546	72781
unused	186057	78114	169505
sum used	1826357	750790	1270317
sum total	1826357	828904	1439822
prop used	1	0.905762	0.882274

## Sheet: delserCGA_2
In Geneious v 11.1.4: Extract seqeunces 80-151 bp long, align to reference SBW25 (42 unique primary sequences) with no iterations, 10% gaps, 10% mismatch and matching equal reads to neither
serCGA deletion mutant 2: Line M3 and M4 ancestor
	Raw reads					Raw reads						Proportions
Primary tRNA	rep1(sample3)	rep2(sample12)	rep3(sample21)		Isotype	rep1(sample3)	rep2(sample12)	rep3(sample21)		Isotype	Gene copy number	Gene set	rep1(sample3)	rep2(sample12)	rep3(sample21)	Mean	SE
Ala-GGC	62169	78111	64543		Ala-GGC	62169	78111	64543		Ala-GGC	2	0.0307692	0.0855819	0.0753136	0.0874414	0.0827789	0.00377109
Ala-UGC	88244	115505	77549		Ala-UGC	88244	115505	77549		Ala-UGC	5	0.0769231	0.121477	0.111368	0.105062	0.112636	0.00478083
Arg-ACG	47500	84292	56165		Arg-ACG	47500	84292	56165		Arg-ACG	2	0.0307692	0.0653885	0.0812732	0.076091	0.0742509	0.0046769
Arg-CCG	3147	5417	4264		Arg-CCG	3147	5417	4264		Arg-CCG	1	0.0153846	0.00433216	0.005223	0.00577677	0.00511064	0.000420788
Arg-CCU	473	906	745		Arg-CCU	473	906	745		Arg-CCU	1	0.0153846	0.000651132	0.000873553	0.00100931	0.000844665	0.000104401
Arg-UCU	1066	1621	876		Arg-UCU	1066	1621	876		Arg-UCU	1	0.0153846	0.00146746	0.00156295	0.00118678	0.00140573	0.000112889
Asn-GUU1	7780	14069	9005		Asn-GUU	9662	16772	11384		Asn-GUU	2	0.0307692	0.0133007	0.0161713	0.0154228	0.0149649	0.000859713
Asn-GUU2	1882	2703	2379		Asp-GUC	70492	98106	65974		Asp-GUC	4	0.0615385	0.0970393	0.0945925	0.08938	0.0936706	0.00225858
Asp-GUC	70492	98106	65974		Cys-GCA	12301	18342	13240		Cys-GCA	1	0.0153846	0.0169336	0.0176851	0.0179372	0.0175186	0.000301455
Cys-GCA-1	12301	18342	13240		fMet-CAU	3086	5456	7350		fMet-CAU	3	0.0461538	0.00424819	0.0052606	0.00995761	0.0064888	0.00175886
fMet-CAU-1	457	828	1170		Gln-UUG	564	1018	629		Gln-UUG	1	0.0153846	0.000776403	0.000981542	0.000852155	0.000870033	5.98894e-05
fMet-CAU-2	2629	4628	6180		Glu-UUC	78	74	87		Glu-UUC	4	0.0615385	0.000107375	7.13498e-05	0.000117866	9.88634e-05	1.40862e-05
Gln-UUG	564	1018	629		Gly-CCC	3736	6376	6148		Gly-CCC	1	0.0153846	0.00514298	0.00614765	0.00832917	0.00653993	0.000940454
Glu-UUC	78	74	87		Gly-GCC	122658	165203	106037		Gly-GCC	3	0.0461538	0.168851	0.159286	0.143656	0.157265	0.00734298
Gly-CCC	3736	6376	6148		Gly-UCC	9805	15436	12626		Gly-UCC	1	0.0153846	0.0134976	0.0148832	0.0171054	0.0151621	0.00105079
Gly-GCC	122658	165203	106037		His-GUG	640	1079	1165		His-GUG	2	0.0307692	0.000881025	0.00104036	0.00157831	0.00116657	0.00021095
Gly-UCC	9805	15436	12626		Ile2-CAU	13	26	36		Ile2-CAU	1	0.0153846	1.78958e-05	2.50688e-05	4.8772e-05	3.05789e-05	9.32925e-06
His-GUG	640	1079	1165		Ile-GAU	34027	45506	30857		Ile-GAU	5	0.0769231	0.0468416	0.0438763	0.0418043	0.0441741	0.00146173
Ile2-CAU	13	26	36		Leu-CAA	15431	20594	15048		Leu-CAA	1	0.0153846	0.0212423	0.0198565	0.0203867	0.0204952	0.000403727
Ile-GAU	34027	45506	30857		Leu-CAG	32193	58932	38549		Leu-CAG	2	0.0307692	0.0443169	0.0568214	0.0522253	0.0511212	0.00365171
Leu-CAA	15431	20594	15048		Leu-GAG	912	2285	1888		Leu-GAG	1	0.0153846	0.00125546	0.00220317	0.00255782	0.00200548	0.000388735
Leu-CAG	32193	58932	38549		Leu-UAA	906	1601	1371		Leu-UAA	1	0.0153846	0.0012472	0.00154366	0.0018574	0.00154942	0.000176173
Leu-GAG	912	2285	1888		Leu-UAG	3591	7608	6601		Leu-UAG	1	0.0153846	0.00494337	0.00733553	0.00894288	0.00707393	0.00116194
Leu-UAA	906	1601	1371		Lys-UUU	61046	87766	59901		Lys-UUU	2	0.0307692	0.084036	0.0846228	0.0811525	0.0832704	0.00107243
Leu-UAG	3591	7608	6601		Met-CAU	1298	3136	2751		Met-CAU	1	0.0153846	0.00178683	0.00302369	0.00372699	0.00284584	0.000567093
Lys-UUU	61046	87766	59901		Phe-GAA	17	33	40		Phe-GAA	1	0.0153846	2.34022e-05	3.18181e-05	5.41911e-05	3.64705e-05	9.18734e-06
Met-CAU	1298	3136	2751		Pro-GGG	4361	6314	3382		Pro-GGG	1	0.0153846	0.00600336	0.00608787	0.00458185	0.00555769	0.000488529
Phe-GAA	17	33	40		Pro-UGG	1833	3337	2101		Pro-UGG	2	0.0307692	0.00252331	0.00321749	0.00284639	0.00286239	0.000200552
Pro-GGG	4361	6314	3382		Ser-CGA	0	3	0		Ser-CGA	0	0	0	2.89256e-06	0	9.64186e-07	9.64186e-07
Pro-UGG	1833	3337	2101		Ser-GCU	9553	12477	9786		Ser-GCU	1	0.0153846	0.0131507	0.0120302	0.0132578	0.0128129	0.000392589
Ser-CGA	0	3	0		Ser-GGA	4346	7172	7207		Ser-GGA	1	0.0153846	0.00598271	0.00691514	0.00976388	0.00755391	0.0011373
Ser-GCU	9553	12477	9786		Ser-UGA	3014	4647	4138		Ser-UGA	1	0.0153846	0.00414907	0.00448057	0.00560607	0.00474524	0.000440924
Ser-GGA	4346	7172	7207		Thr-CGU	128	235	177		Thr-CGU	1	0.0153846	0.000176205	0.000226584	0.000239795	0.000214195	1.9374e-05
Ser-UGA	3014	4647	4138		Thr-GGU	1059	2731	3103		Thr-GGU	1	0.0153846	0.00145782	0.00263319	0.00420387	0.00276496	0.00079545
Thr-CGU	128	235	177		Thr-UGU	6608	12592	14901		Thr-UGU	1	0.0153846	0.00909658	0.012141	0.0201875	0.0138084	0.00330844
Thr-GGU	1059	2731	3103		Trp-CCA	32251	40171	25423		Trp-CCA	1	0.0153846	0.0443968	0.0387323	0.0344425	0.0391905	0.00288267
Thr-UGU	6608	12592	14901		Tyr-GUA	6504	12915	10258		Tyr-GUA	1	0.0153846	0.00895341	0.0124525	0.0138973	0.0117677	0.00146767
Trp-CCA	32251	40171	25423		Val-GAC	25536	29116	19820		Val-GAC	1	0.0153846	0.0351529	0.0280732	0.0268517	0.0300259	0.00258761
Tyr-GUA	6504	12915	10258		Val-UAC	46179	64233	52009		Val-UAC	3	0.0461538	0.06357	0.0619326	0.0704606	0.0653211	0.00261287
Val-GAC	25536	29116	19820			726427	1037144	738129			65	1	1	1	1	1
Val-UAC	46179	64233	52009
unused	104798	107184	96240
sum used	831225	1037144	834369
sum total	831225	1144328	834369
prop used	1	0.906335	1

## Sheet: W1-L
In Geneious v 11.1.4: Extract seqeunces 80-151 bp long, align to reference SBW25 (42 unique primary sequences) with no iterations, 10% gaps, 10% mismatch and matching equal reads to neither
W1-L: Evolved WT (derived from SBW25)
	Raw reads					Raw reads						Proportions
Primary tRNA	rep1(sample9)	rep2(sample18)	rep3(sample27)		Isotype	rep1(sample9)	rep2(sample18)	rep3(sample27)		Isotype	Gene copy number	Gene set	rep1(sample9)	rep2(sample18)	rep3(sample27)	Mean	SE
Ala-GGC	65748	83404	94985		Ala-GGC	65748	83404	94985		Ala-GGC	2	0.030303	0.0672423	0.0605702	0.0750374	0.0676166	0.00418051
Ala-UGC	116176	167164	154711		Ala-UGC	116176	167164	154711		Ala-UGC	5	0.0757576	0.118816	0.121399	0.12222	0.120812	0.00102557
Arg-ACG	84513	79259	94908		Arg-ACG	84513	79259	94908		Arg-ACG	2	0.030303	0.0864337	0.05756	0.0749765	0.0729901	0.0083941
Arg-CCG	8346	7655	9900		Arg-CCG	8346	7655	9900		Arg-CCG	1	0.0151515	0.00853568	0.00555926	0.00782092	0.00730529	0.000897064
Arg-CCU	1133	1300	1611		Arg-CCU	1133	1300	1611		Arg-CCU	1	0.0151515	0.00115875	0.000944094	0.00127268	0.00112517	9.63278e-05
Arg-UCU	1471	2951	1836		Arg-UCU	1471	2951	1836		Arg-UCU	1	0.0151515	0.00150443	0.00214309	0.00145042	0.00169932	0.000222436
Asn-GUU1	14205	26510	17520		Asn-GUU	17571	32273	21363		Asn-GUU	2	0.030303	0.0179703	0.0234375	0.0168766	0.0194281	0.00202939
Asn-GUU2	3366	5763	3843		Asp-GUC	95213	112968	107038		Asp-GUC	4	0.0606061	0.0973769	0.0820403	0.0845591	0.0879921	0.00474839
Asp-GUC	95213	112968	107038		Cys-GCA	12098	22224	21798		Cys-GCA	1	0.0151515	0.012373	0.0161397	0.0172202	0.0152443	0.00146916
Cys-GCA-1	12098	22224	21798		fMet-CAU	9127	5065	9834		fMet-CAU	3	0.0454545	0.00933443	0.00367834	0.00776878	0.00692718	0.00168613
fMet-CAU-1	1384	773	1506		Gln-UUG	1222	1808	1409		Gln-UUG	1	0.0151515	0.00124977	0.00131302	0.0011131	0.0012253	5.8995e-05
fMet-CAU-2	7743	4292	8328		Glu-UUC	49	178	49		Glu-UUC	4	0.0606061	5.01136e-05	0.000129268	3.87096e-05	7.26972e-05	2.84765e-05
Gln-UUG	1222	1808	1409		Gly-CCC	6054	8096	9672		Gly-CCC	1	0.0151515	0.00619159	0.00587953	0.0076408	0.00657064	0.00054261
Glu-UUC	49	178	49		Gly-GCC	129972	193026	175862		Gly-GCC	3	0.0454545	0.132926	0.140181	0.13893	0.137345	0.00223904
Gly-CCC	6054	8096	9672		Gly-UCC	16074	25750	23099		Gly-UCC	1	0.0151515	0.0164393	0.0187003	0.018248	0.0177959	0.00069074
Gly-GCC	129972	193026	175862		His-GUG	1081	921	1349		His-GUG	2	0.030303	0.00110557	0.000668855	0.0010657	0.000946707	0.000139402
Gly-UCC	16074	25750	23099		Ile2-CAU	29	24	28		Ile2-CAU	1	0.0151515	2.96591e-05	1.74294e-05	2.21198e-05	2.30694e-05	3.56218e-06
His-GUG	1081	921	1349		Ile-GAU	46205	71996	53080		Ile-GAU	5	0.0757576	0.0472551	0.0522854	0.0419328	0.0471578	0.00298894
Ile2-CAU	29	24	28		Leu-CAA	20627	38353	29723		Leu-CAA	1	0.0151515	0.0210958	0.027853	0.0234809	0.0241432	0.00197854
Ile-GAU	46205	71996	53080		Leu-CAG	54704	74860	62473		Leu-CAG	2	0.030303	0.0559473	0.0543653	0.0493532	0.0532219	0.00198755
Leu-CAA	20627	38353	29723		Leu-GAG	2408	2246	2662		Leu-GAG	1	0.0151515	0.00246273	0.0016311	0.00210296	0.0020656	0.000240794
Leu-CAG	54704	74860	62473		Leu-UAA	1146	1711	1894		Leu-UAA	1	0.0151515	0.00117205	0.00124257	0.00149624	0.00130362	9.84401e-05
Leu-GAG	2408	2246	2662		Leu-UAG	6863	8499	9502		Leu-UAG	1	0.0151515	0.00701898	0.0061722	0.0075065	0.00689923	0.000389806
Leu-UAA	1146	1711	1894		Lys-UUU	71959	136269	112235		Lys-UUU	2	0.030303	0.0735944	0.0989621	0.0886647	0.0870738	0.00736611
Leu-UAG	6863	8499	9502		Met-CAU	3658	3726	4825		Met-CAU	1	0.0151515	0.00374114	0.00270592	0.00381171	0.00341959	0.000357416
Lys-UUU	71959	136269	112235		Phe-GAA	44	54	73		Phe-GAA	1	0.0151515	4.5e-05	3.92162e-05	5.76694e-05	4.72952e-05	5.44919e-06
Met-CAU	3658	3726	4825		Pro-GGG	4908	9713	5976		Pro-GGG	1	0.0151515	0.00501954	0.00705384	0.00472099	0.00559812	0.000732941
Phe-GAA	44	54	73		Pro-UGG	2448	4343	3446		Pro-UGG	2	0.030303	0.00250364	0.003154	0.00272231	0.00279332	0.000191072
Pro-GGG	4908	9713	5976		Ser-CGA	12094	21761	16483		Ser-CGA	1	0.0151515	0.0123689	0.0158034	0.0130214	0.0137312	0.00105308
Pro-UGG	2448	4343	3446		Ser-GCU	12153	18374	16194		Ser-GCU	1	0.0151515	0.0124292	0.0133437	0.0127931	0.0128553	0.000265815
Ser-CGA	12094	21761	16483		Ser-GGA	7246	9486	9136		Ser-GGA	1	0.0151515	0.00741068	0.00688898	0.00721736	0.00717234	0.000152274
Ser-GCU	12153	18374	16194		Ser-UGA	4473	8549	7483		Ser-UGA	1	0.0151515	0.00457466	0.00620851	0.00591151	0.00556489	0.000502485
Ser-GGA	7246	9486	9136		Thr-CGU	365	536	590		Thr-CGU	1	0.0151515	0.000373295	0.000389257	0.000466095	0.000409549	2.86459e-05
Ser-UGA	4473	8549	7483		Thr-GGU	2224	1650	3421		Thr-GGU	1	0.0151515	0.00227454	0.00119827	0.00270256	0.00205846	0.000447489
Thr-CGU	365	536	590		Thr-UGU	17369	12446	19477		Thr-UGU	1	0.0151515	0.0177637	0.00903861	0.0153867	0.014063	0.00260423
Thr-GGU	2224	1650	3421		Trp-CCA	42382	74528	52690		Trp-CCA	1	0.0151515	0.0433452	0.0541242	0.0416247	0.0463647	0.00391142
Thr-UGU	17369	12446	19477		Tyr-GUA	11437	17089	17888		Tyr-GUA	1	0.0151515	0.0116969	0.0124105	0.0141314	0.0127463	0.000722539
Trp-CCA	42382	74528	52690		Val-GAC	28888	48169	33152		Val-GAC	1	0.0151515	0.0295445	0.0349816	0.0261898	0.0302386	0.00256159
Tyr-GUA	11437	17089	17888		Val-UAC	58300	68557	73981		Val-UAC	3	0.0454545	0.059625	0.0497879	0.0584444	0.0559524	0.00310104
Val-GAC	28888	48169	33152			977778	1376981	1265836			66	1	1	1	1	1
Val-UAC	58300	68557	73981
unused	118194	156338	193339
sum used	977778	1376981	1265836
sum total	1095972	1533319	1459175
prop used	0.892156	0.898039	0.867501

## Sheet: M1-L
In Geneious v 11.1.4: Extract seqeunces 80-151 bp long, align to reference SBW25 (42 unique primary sequences) with no iterations, 10% gaps, 10% mismatch and matching equal reads to neither
M1-L: Evolved serCGA deletion mutant (derived from delserCGA-1)
	Raw reads					Raw reads						Proportions
Primary tRNA	rep1(sample4)	rep2(sample13)	rep3(sample22)		Isotype	rep1(sample4)	rep2(sample13)	rep3(sample22)		Isotype	Gene copy number	Gene set	rep1(sample4)	rep2(sample13)	rep3(sample22)	Mean	SE
Ala-GGC	70396	48123	103886		Ala-GGC	70396	48123	103886		Ala-GGC	2	0.030303	0.0724292	0.0730326	0.0767123	0.074058	0.0013385
Ala-UGC	124928	81416	165638		Ala-UGC	124928	81416	165638		Ala-UGC	5	0.0757576	0.128536	0.123559	0.122312	0.124802	0.0019014
Arg-ACG	63511	41756	112926		Arg-ACG	63511	41756	112926		Arg-ACG	2	0.030303	0.0653454	0.0633699	0.0833877	0.070701	0.00636893
Arg-CCG	6071	3883	10973		Arg-CCG	6071	3883	10973		Arg-CCG	1	0.0151515	0.00624635	0.00589293	0.00810277	0.00674735	0.000685345
Arg-CCU	817	595	1591		Arg-CCU	817	595	1591		Arg-CCU	1	0.0151515	0.000840597	0.000902986	0.00117484	0.000972807	0.000102608
Arg-UCU	1701	1022	1947		Arg-UCU	1701	1022	1947		Arg-UCU	1	0.0151515	0.00175013	0.00155101	0.00143772	0.00157962	9.13127e-05
Asn-GUU1	17059	8292	17812		Asn-GUU	21340	10168	21969		Asn-GUU	2	0.030303	0.0219564	0.0154312	0.0162225	0.01787	0.0020559
Asn-GUU2	4281	1876	4157		Asp-GUC	88757	63446	127169		Asp-GUC	4	0.0606061	0.0913206	0.0962871	0.0939051	0.0938376	0.00143413
Asp-GUC	88757	63446	127169		Cys-GCA	16475	11434	21304		Cys-GCA	1	0.0151515	0.0169508	0.0173525	0.0157315	0.0166783	0.000487398
Cys-GCA-1	16475	11434	21304		fMet-CAU	5250	4018	12050		fMet-CAU	3	0.0454545	0.00540163	0.00609781	0.00889805	0.00679917	0.00106851
fMet-CAU-1	803	630	1810		Gln-UUG	1422	576	1572		Gln-UUG	1	0.0151515	0.00146307	0.000874151	0.00116081	0.00116601	0.000170027
fMet-CAU-2	4447	3388	10240		Glu-UUC	118	19	37		Glu-UUC	4	0.0606061	0.000121408	2.88348e-05	2.73218e-05	5.91883e-05	3.1113e-05
Gln-UUG	1422	576	1572		Gly-CCC	5536	4262	10105		Gly-CCC	1	0.0151515	0.0056959	0.00646811	0.00746181	0.00654194	0.000511111
Glu-UUC	118	19	37		Gly-GCC	132663	94778	196003		Gly-GCC	3	0.0454545	0.136495	0.143837	0.144734	0.141689	0.00260986
Gly-CCC	5536	4262	10105		Gly-UCC	15838	11402	24583		Gly-UCC	1	0.0151515	0.0162954	0.0173039	0.0181528	0.0172507	0.000536822
Gly-GCC	132663	94778	196003		His-GUG	814	544	1584		His-GUG	2	0.030303	0.000837511	0.000825587	0.00116967	0.000944256	0.000112759
Gly-UCC	15838	11402	24583		Ile2-CAU	27	19	37		Ile2-CAU	1	0.0151515	2.77798e-05	2.88348e-05	2.73218e-05	2.79788e-05	4.47963e-07
His-GUG	814	544	1584		Ile-GAU	47470	33863	51637		Ile-GAU	5	0.0757576	0.0488411	0.0513913	0.0381302	0.0461208	0.00406259
Ile2-CAU	27	19	37		Leu-CAA	23776	16661	28924		Leu-CAA	1	0.0151515	0.0244627	0.0252851	0.0213583	0.023702	0.00119569
Ile-GAU	47470	33863	51637		Leu-CAG	54264	33416	62111		Leu-CAG	2	0.030303	0.0558313	0.0507129	0.0458645	0.0508029	0.00287753
Leu-CAA	23776	16661	28924		Leu-GAG	1992	1193	2813		Leu-GAG	1	0.0151515	0.00204953	0.00181052	0.0020772	0.00197909	8.46578e-05
Leu-CAG	54264	33416	62111		Leu-UAA	1235	885	1956		Leu-UAA	1	0.0151515	0.00127067	0.0013431	0.00144436	0.00135271	5.0371e-05
Leu-GAG	1992	1193	2813		Leu-UAG	6826	4231	9164		Leu-UAG	1	0.0151515	0.00702315	0.00642106	0.00676695	0.00673706	0.00017445
Leu-UAA	1235	885	1956		Lys-UUU	80887	56531	114674		Lys-UUU	2	0.030303	0.0832232	0.0857928	0.0846784	0.0845648	0.000743931
Leu-UAG	6826	4231	9164		Met-CAU	3421	1813	5050		Met-CAU	1	0.0151515	0.00351981	0.00275145	0.00372906	0.00333344	0.000297198
Lys-UUU	80887	56531	114674		Phe-GAA	51	23	93		Phe-GAA	1	0.0151515	5.2473e-05	3.49053e-05	6.86738e-05	5.20174e-05	9.75077e-06
Met-CAU	3421	1813	5050		Pro-GGG	5937	3135	5578		Pro-GGG	1	0.0151515	0.00610848	0.00475775	0.00411895	0.00499506	0.000586456
Phe-GAA	51	23	93		Pro-UGG	3156	1640	3183		Pro-UGG	2	0.030303	0.00324715	0.0024889	0.00235041	0.00269549	0.000278714
Pro-GGG	5937	3135	5578		Ser-CGA	1	0	1		Ser-CGA	0	0	1.02888e-06	0	7.38428e-07	5.89103e-07	3.06253e-07
Pro-UGG	3156	1640	3183		Ser-GCU	12978	8914	16709		Ser-GCU	1	0.0151515	0.0133528	0.0135281	0.0123384	0.0130731	0.000370828
Ser-CGA	1	0	1		Ser-GGA	6663	4692	10265		Ser-GGA	1	0.0151515	0.00685545	0.00712069	0.00757996	0.00718536	0.000211634
Ser-GCU	12978	8914	16709		Ser-UGA	12666	9770	16668		Ser-UGA	2	0.030303	0.0130318	0.0148272	0.0123081	0.013389	0.000748805
Ser-GGA	6663	4692	10265		Thr-CGU	342	248	602		Thr-CGU	1	0.0151515	0.000351878	0.000376371	0.000444533	0.000390927	2.77199e-05
Ser-UGA	12666	9770	16668		Thr-GGU	1973	1030	3354		Thr-GGU	1	0.0151515	0.00202999	0.00156315	0.00247669	0.00202327	0.000263736
Thr-CGU	342	248	602		Thr-UGU	10515	7221	22320		Thr-UGU	1	0.0151515	0.0108187	0.0109588	0.0164817	0.0127531	0.00186476
Thr-GGU	1973	1030	3354		Trp-CCA	43810	30336	54527		Trp-CCA	1	0.0151515	0.0450754	0.0460386	0.0402642	0.0437927	0.00178603
Thr-UGU	10515	7221	22320		Tyr-GUA	15011	9185	15426		Tyr-GUA	1	0.0151515	0.0154446	0.0139394	0.011391	0.0135916	0.00118301
Trp-CCA	43810	30336	54527		Val-GAC	30666	19215	35050		Val-GAC	1	0.0151515	0.0315517	0.0291611	0.0258819	0.0288649	0.00164343
Tyr-GUA	15011	9185	15426		Val-UAC	52624	37462	80750		Val-UAC	3	0.0454545	0.0541439	0.0568532	0.059628	0.0568751	0.00158316
Val-GAC	30666	19215	35050			971928	658925	1354229			66	1	1	1	1	1
Val-UAC	52624	37462	80750
unused	108298	87196	160065
sum used	971928	746121	1354229
sum total	1080226	746121	1514294
prop used	0.899745	1	0.894297

## Sheet: M2-L
In Geneious v 11.1.4: Extract seqeunces 80-151 bp long, align to reference SBW25 (42 unique primary sequences) with no iterations, 10% gaps, 10% mismatch and matching equal reads to neither
M2-L: Evolved serCGA deletion mutant (derived from delserCGA-1)
	Raw reads					Raw reads						Proportions
Primary tRNA	rep1(sample6)	rep2(sample15)	rep3(sample24)		Isotype	rep1(sample6)	rep2(sample15)	rep3(sample24)		Isotype	Gene copy number	Gene set	rep1(sample6)	rep2(sample15)	rep3(sample24)	Mean	SE
Ala-GGC	60473	38240	76664		Ala-GGC	60473	38240	76664		Ala-GGC	2	0.030303	0.0700776	0.0668991	0.0709701	0.0693156	0.00123541
Ala-UGC	99738	64753	124529		Ala-UGC	99738	64753	124529		Ala-UGC	5	0.0757576	0.115579	0.113282	0.11528	0.114714	0.000720883
Arg-ACG	69520	40212	71310		Arg-ACG	69520	40212	71310		Arg-ACG	2	0.030303	0.0805615	0.070349	0.0660137	0.0723081	0.00431231
Arg-CCG	6689	3433	6721		Arg-CCG	6689	3433	6721		Arg-CCG	1	0.0151515	0.00775138	0.00600587	0.00622182	0.00665969	0.000549392
Arg-CCU	1056	499	1119		Arg-CCU	1056	499	1119		Arg-CCU	1	0.0151515	0.00122372	0.000872977	0.00103589	0.0010442	0.000101336
Arg-UCU	1319	893	1714		Arg-UCU	1319	893	1714		Arg-UCU	1	0.0151515	0.00152849	0.00156226	0.0015867	0.00155915	1.68753e-05
Asn-GUU1	14957	7984	18553		Asn-GUU	19225	9860	22968		Asn-GUU	2	0.030303	0.0222784	0.0172496	0.0212621	0.0202634	0.00153518
Asn-GUU2	4268	1876	4415		Asp-GUC	76165	57701	92765		Asp-GUC	4	0.0606061	0.0882619	0.100945	0.0858752	0.0916941	0.00467658
Asp-GUC	76165	57701	92765		Cys-GCA	11488	9459	18617		Cys-GCA	1	0.0151515	0.0133126	0.0165481	0.0172343	0.0156983	0.0012092
Cys-GCA-1	11488	9459	18617		fMet-CAU	10522	4393	8117		fMet-CAU	3	0.0454545	0.0121932	0.00768535	0.00751414	0.00913088	0.00153193
fMet-CAU-1	1583	694	1241		Gln-UUG	1295	660	1395		Gln-UUG	1	0.0151515	0.00150068	0.00115464	0.00129139	0.00131557	0.000100622
fMet-CAU-2	8939	3699	6876		Glu-UUC	146	53	133		Glu-UUC	4	0.0606061	0.000169188	9.2721e-05	0.000123122	0.000128344	2.22281e-05
Gln-UUG	1295	660	1395		Gly-CCC	5947	3739	8287		Gly-CCC	1	0.0151515	0.00689153	0.00654121	0.00767151	0.00703475	0.000334057
Glu-UUC	146	53	133		Gly-GCC	112626	79833	146398		Gly-GCC	3	0.0454545	0.130514	0.139664	0.135525	0.135234	0.00264546
Gly-CCC	5947	3739	8287		Gly-UCC	15931	11040	21545		Gly-UCC	1	0.0151515	0.0184612	0.019314	0.0199448	0.01924	0.000429867
Gly-GCC	112626	79833	146398		His-GUG	1256	617	1013		His-GUG	2	0.030303	0.00145548	0.00107941	0.000937763	0.00115755	0.000154476
Gly-UCC	15931	11040	21545		Ile2-CAU	32	13	35		Ile2-CAU	1	0.0151515	3.70824e-05	2.27429e-05	3.24005e-05	3.07419e-05	4.22171e-06
His-GUG	1256	617	1013		Ile-GAU	41572	29943	51161		Ile-GAU	5	0.0757576	0.0481747	0.0523839	0.0473612	0.0493066	0.00155647
Ile2-CAU	32	13	35		Leu-CAA	16534	13529	27127		Leu-CAA	1	0.0151515	0.01916	0.0236684	0.0251122	0.0226469	0.00179256
Ile-GAU	41572	29943	51161		Leu-CAG	45694	33322	61418		Leu-CAG	2	0.030303	0.0529514	0.0582953	0.0568564	0.0560344	0.00159648
Leu-CAA	16534	13529	27127		Leu-GAG	2446	1342	2331		Leu-GAG	1	0.0151515	0.00283449	0.00234777	0.00215787	0.00244671	0.000201489
Leu-CAG	45694	33322	61418		Leu-UAA	1264	813	1707		Leu-UAA	1	0.0151515	0.00146475	0.00142231	0.00158022	0.00148909	4.71819e-05
Leu-GAG	2446	1342	2331		Leu-UAG	7085	4348	8507		Leu-UAG	1	0.0151515	0.00821028	0.00760662	0.00787517	0.00789736	0.000174612
Leu-UAA	1264	813	1707		Lys-UUU	68030	47522	96978		Lys-UUU	2	0.030303	0.0788349	0.0831375	0.0897753	0.0839159	0.00318213
Leu-UAG	7085	4348	8507		Met-CAU	4498	2071	4285		Met-CAU	1	0.0151515	0.0052124	0.00362312	0.00396675	0.00426742	0.000482788
Lys-UUU	68030	47522	96978		Phe-GAA	63	20	49		Phe-GAA	1	0.0151515	7.3006e-05	3.49891e-05	4.53607e-05	5.11186e-05	1.13459e-05
Met-CAU	4498	2071	4285		Pro-GGG	4534	2541	5514		Pro-GGG	1	0.0151515	0.00525411	0.00444536	0.00510447	0.00493465	0.000248428
Phe-GAA	63	20	49		Pro-UGG	2460	1397	3095		Pro-UGG	2	0.030303	0.00285071	0.00244399	0.00286513	0.00271994	0.000138041
Pro-GGG	4534	2541	5514		Ser-CGA	3	0	2		Ser-CGA	0	0	3.47648e-06	0	1.85146e-06	1.77598e-06	1.00428e-06
Pro-UGG	2460	1397	3095		Ser-GCU	9489	7006	14655		Ser-GCU	1	0.0151515	0.0109961	0.0122567	0.0135666	0.0122731	0.000742075
Ser-CGA	3	0	2		Ser-GGA	6749	4131	9350		Ser-GGA	1	0.0151515	0.00782091	0.00722699	0.00865556	0.00790116	0.00041434
Ser-GCU	9489	7006	14655		Ser-UGA	8592	6787	14694		Ser-UGA	2	0.030303	0.00995663	0.0118735	0.0136027	0.0118109	0.00105298
Ser-GGA	6749	4131	9350		Thr-CGU	361	198	402		Thr-CGU	1	0.0151515	0.000418336	0.000346392	0.000372143	0.000378957	2.1046e-05
Ser-UGA	8592	6787	14694		Thr-GGU	3545	1077	2228		Thr-GGU	1	0.0151515	0.00410803	0.00188416	0.00206252	0.00268491	0.000713425
Thr-CGU	361	198	402		Thr-UGU	17292	8946	16668		Thr-UGU	1	0.0151515	0.0200384	0.0156506	0.01543	0.0170397	0.00150071
Thr-GGU	3545	1077	2228		Trp-CCA	35624	24275	45345		Trp-CCA	1	0.0151515	0.041282	0.042468	0.0419772	0.041909	0.00034406
Thr-UGU	17292	8946	16668		Tyr-GUA	12400	8271	15391		Tyr-GUA	1	0.0151515	0.0143694	0.0144697	0.0142479	0.0143624	6.41375e-05
Trp-CCA	35624	24275	45345		Val-GAC	25905	15509	31636		Val-GAC	1	0.0151515	0.0300194	0.0271323	0.0292864	0.0288127	0.00086643
Tyr-GUA	12400	8271	15391		Val-UAC	55375	33161	64357		Val-UAC	3	0.0454545	0.0641699	0.0580136	0.0595771	0.0605869	0.0018475
Val-GAC	25905	15509	31636			862943	571607	1080230			66	1	1	1	1	1
Val-UAC	55375	33161	64357
unused	124372	65388	143464
sum used	862943	636995	1080230
sum total	987315	636995	1223694
prop used	0.87403	1	0.882762

## Sheet: M2-Lop
In Geneious v 11.1.4: Extract seqeunces 80-151 bp long, align to reference SBW25 (42 unique primary sequences) with no iterations, 10% gaps, 10% mismatch and matching equal reads to neither
M2-Lop: Evolved serCGA deletion mutant (derived from delserCGA-1)
	Raw reads					Raw reads						Proportions
Primary tRNA	rep1(sample5)	rep2(sample14)	rep3(sample23)		Isotype	rep1(sample5)	rep2(sample14)	rep3(sample23)		Isotype	Gene copy number	Gene set	rep1(sample5)	rep2(sample14)	rep3(sample23)	Mean	SE
Ala-GGC	78348	38782	92951		Ala-GGC	78348	38782	92951		Ala-GGC	2	0.030303	0.0697806	0.0650397	0.067334	0.0673847	0.0013688
Ala-UGC	142834	68142	162875		Ala-UGC	142834	68142	162875		Ala-UGC	5	0.0757576	0.127215	0.114278	0.117987	0.119827	0.00384613
Arg-ACG	71978	36875	76604		Arg-ACG	71978	36875	76604		Arg-ACG	2	0.030303	0.0641071	0.0618415	0.0554922	0.0604803	0.00257838
Arg-CCG	6409	3350	7283		Arg-CCG	6409	3350	7283		Arg-CCG	1	0.0151515	0.00570817	0.00561815	0.00527583	0.00553405	0.000131699
Arg-CCU	1081	589	1252		Arg-CCU	1081	589	1252		Arg-CCU	1	0.0151515	0.000962791	0.000987788	0.000906953	0.000952511	2.38945e-05
Arg-UCU	1924	1078	2399		Arg-UCU	1924	1078	2399		Arg-UCU	1	0.0151515	0.00171361	0.00180787	0.00173784	0.00175311	2.82609e-05
Asn-GUU1	21790	11634	29773		Asn-GUU	28047	14613	38062		Asn-GUU	2	0.030303	0.02498	0.0245069	0.0275722	0.0256864	0.00095277
Asn-GUU2	6257	2979	8289		Asp-GUC	105017	62809	121819		Asp-GUC	4	0.0606061	0.0935333	0.105334	0.0882461	0.0957046	0.00505103
Asp-GUC	105017	62809	121819		Cys-GCA	16212	10077	25093		Cys-GCA	1	0.0151515	0.0144392	0.0168997	0.0181774	0.0165055	0.001097
Cys-GCA-1	16212	10077	25093		fMet-CAU	6101	2978	7032		fMet-CAU	3	0.0454545	0.00543385	0.00499428	0.005094	0.00517404	0.000133054
fMet-CAU-1	912	491	1038		Gln-UUG	2005	1082	2268		Gln-UUG	1	0.0151515	0.00178575	0.00181458	0.00164295	0.00174776	5.30626e-05
fMet-CAU-2	5189	2487	5994		Glu-UUC	222	82	182		Glu-UUC	4	0.0606061	0.000197724	0.000137519	0.000131841	0.000155695	2.10785e-05
Gln-UUG	2005	1082	2268		Gly-CCC	6815	4046	9735		Gly-CCC	1	0.0151515	0.00606977	0.00678538	0.00705206	0.00663574	0.000293268
Glu-UUC	222	82	182		Gly-GCC	156690	83924	190788		Gly-GCC	3	0.0454545	0.139556	0.140745	0.138207	0.139503	0.000733157
Gly-CCC	6815	4046	9735		Gly-UCC	19404	10764	25054		Gly-UCC	1	0.0151515	0.0172821	0.0180519	0.0181492	0.0178277	0.000274236
Gly-GCC	156690	83924	190788		His-GUG	953	462	958		His-GUG	2	0.030303	0.000848788	0.000774801	0.000693978	0.000772523	4.47044e-05
Gly-UCC	19404	10764	25054		Ile2-CAU	41	15	49		Ile2-CAU	1	0.0151515	3.65166e-05	2.51559e-05	3.54957e-05	3.23894e-05	3.62875e-06
His-GUG	953	462	958		Ile-GAU	55964	31633	73332		Ile-GAU	5	0.0757576	0.0498443	0.0530504	0.0531219	0.0520055	0.00108083
Ile2-CAU	41	15	49		Leu-CAA	25407	13867	36383		Leu-CAA	1	0.0151515	0.0226287	0.0232558	0.026356	0.0240801	0.00115221
Ile-GAU	55964	31633	73332		Leu-CAG	57569	32202	72575		Leu-CAG	2	0.030303	0.0512738	0.0540046	0.0525736	0.0526173	0.000788643
Leu-CAA	25407	13867	36383		Leu-GAG	2173	1229	2813		Leu-GAG	1	0.0151515	0.00193538	0.00206111	0.00203775	0.00201141	3.86087e-05
Leu-CAG	57569	32202	72575		Leu-UAA	1515	838	1919		Leu-UAA	1	0.0151515	0.00134933	0.00140538	0.00139013	0.00138161	1.67291e-05
Leu-GAG	2173	1229	2813		Leu-UAG	7369	4269	10202		Leu-UAG	1	0.0151515	0.00656319	0.00715936	0.00739036	0.00703764	0.000246418
Leu-UAA	1515	838	1919		Lys-UUU	94370	50292	128034		Lys-UUU	2	0.030303	0.0840505	0.0843426	0.0927482	0.0870471	0.00285179
Leu-UAG	7369	4269	10202		Met-CAU	4124	2355	5564		Met-CAU	1	0.0151515	0.00367304	0.00394947	0.00403058	0.00388436	0.000108226
Lys-UUU	94370	50292	128034		Phe-GAA	56	43	87		Phe-GAA	1	0.0151515	4.98763e-05	7.21135e-05	6.30231e-05	6.1671e-05	6.45483e-06
Met-CAU	4124	2355	5564		Pro-GGG	6176	3136	7989		Pro-GGG	1	0.0151515	0.00550065	0.00525926	0.00578726	0.00551572	0.000152606
Phe-GAA	56	43	87		Pro-UGG	2749	1743	3955		Pro-UGG	2	0.030303	0.00244839	0.00292311	0.00286501	0.00274551	0.000149501
Pro-GGG	6176	3136	7989		Ser-CGA	1	0	0		Ser-CGA	0	0	8.90649e-07	0	0	2.96883e-07	2.96883e-07
Pro-UGG	2749	1743	3955		Ser-GCU	13494	8340	18237		Ser-GCU	1	0.0151515	0.0120184	0.0139867	0.0132109	0.013072	0.000572417
Ser-CGA	1	0	0		Ser-GGA	8309	4678	11815		Ser-GGA	1	0.0151515	0.0074004	0.00784528	0.00855882	0.00793483	0.000337392
Ser-GCU	13494	8340	18237		Ser-UGA	11537	7636	19540		Ser-UGA	2	0.030303	0.0102754	0.012806	0.0141548	0.0124121	0.00113708
Ser-GGA	8309	4678	11815		Thr-CGU	442	204	443		Thr-CGU	1	0.0151515	0.000393667	0.00034212	0.000320911	0.000352232	2.1603e-05
Ser-UGA	11537	7636	19540		Thr-GGU	2013	988	2308		Thr-GGU	1	0.0151515	0.00179288	0.00165693	0.00167192	0.00170724	4.3034e-05
Thr-CGU	442	204	443		Thr-UGU	12607	6917	14376		Thr-UGU	1	0.0151515	0.0112284	0.0116002	0.010414	0.0110809	0.000350281
Thr-GGU	2013	988	2308		Trp-CCA	55453	28281	68720		Trp-CCA	1	0.0151515	0.0493891	0.0474289	0.049781	0.0488663	0.000727567
Thr-UGU	12607	6917	14376		Tyr-GUA	13497	9261	22952		Tyr-GUA	1	0.0151515	0.0120211	0.0155312	0.0166265	0.0147263	0.00138906
Trp-CCA	55453	28281	68720		Val-GAC	39354	17417	44877		Val-GAC	1	0.0151515	0.0350506	0.0292093	0.032509	0.0322563	0.00169095
Tyr-GUA	13497	9261	22952		Val-UAC	64517	31285	69922		Val-UAC	3	0.0454545	0.057462	0.0524668	0.0506517	0.0535268	0.00203615
Val-GAC	39354	17417	44877			1122777	596282	1380447			66	1	1	1	1	1
Val-UAC	64517	31285	69922
unused	122828	64090	168021
sum used	1122777	660372	1548468
sum total	1245605	660372	1548468
prop used	0.901391	1	1

## Sheet: M3-L
In Geneious v 11.1.4: Extract seqeunces 80-151 bp long, align to reference SBW25 (42 unique primary sequences) with no iterations, 10% gaps, 10% mismatch and matching equal reads to neither
M3-L: Evolved serCGA deletion mutant (derived from delserCGA-2)
	Raw reads					Raw reads						Proportions
Primary tRNA	rep1(sample7)	rep2(sample16)	rep3(sample25)		Isotype	rep1(sample7)	rep2(sample16)	rep3(sample25)		Isotype	Gene copy number	Gene set	rep1(sample7)	rep2(sample16)	rep3(sample25)	Mean	SE
Ala-GGC	69531	84449	69244		Ala-GGC	69531	84449	69244		Ala-GGC	2	0.030303	0.0659814	0.0636294	0.0755931	0.0684013	0.00365945
Ala-UGC	116260	155104	105419		Ala-UGC	116260	155104	105419		Ala-UGC	5	0.0757576	0.110325	0.116865	0.115085	0.114092	0.00195235
Arg-ACG	93777	92877	68913		Arg-ACG	93777	92877	68913		Arg-ACG	2	0.030303	0.0889896	0.0699796	0.0752318	0.078067	0.00566786
Arg-CCG	8238	8105	6471		Arg-CCG	8238	8105	6471		Arg-CCG	1	0.0151515	0.00781744	0.00610684	0.00706434	0.00699621	0.000494984
Arg-CCU	1251	1260	1098		Arg-CCU	1251	1260	1098		Arg-CCU	1	0.0151515	0.00118714	0.000949366	0.00119868	0.00111173	8.12485e-05
Arg-UCU	1606	1911	1517		Arg-UCU	1606	1911	1517		Arg-UCU	1	0.0151515	0.00152401	0.00143987	0.0016561	0.00153999	6.29282e-05
Asn-GUU1	14869	26157	12481		Asn-GUU	18185	31419	15569		Asn-GUU	2	0.030303	0.0172566	0.0236731	0.0169966	0.0193088	0.00218347
Asn-GUU2	3316	5262	3088		Asp-GUC	113247	135917	86679		Asp-GUC	4	0.0606061	0.107466	0.102409	0.0946268	0.1015	0.00373399
Asp-GUC	113247	135917	86679		Cys-GCA	14810	21377	14683		Cys-GCA	1	0.0151515	0.0140539	0.0161068	0.0160293	0.0153967	0.000671751
Cys-GCA-1	14810	21377	14683		fMet-CAU	10870	5050	8240		fMet-CAU	3	0.0454545	0.0103151	0.003805	0.00899554	0.00770521	0.00198696
fMet-CAU-1	1763	849	1282		Gln-UUG	1570	1830	1274		Gln-UUG	1	0.0151515	0.00148985	0.00137884	0.00139082	0.00141984	3.51775e-05
fMet-CAU-2	9107	4201	6958		Glu-UUC	52	190	60		Glu-UUC	4	0.0606061	4.93454e-05	0.000143158	6.55015e-05	8.60018e-05	2.89564e-05
Gln-UUG	1570	1830	1274		Gly-CCC	6959	8133	6853		Gly-CCC	1	0.0151515	0.00660374	0.00612793	0.00748137	0.00673768	0.000396401
Glu-UUC	52	190	60		Gly-GCC	146019	189653	128846		Gly-GCC	3	0.0454545	0.138565	0.142897	0.14066	0.140707	0.00125086
Gly-CCC	6959	8133	6853		Gly-UCC	17838	24159	16289		Gly-UCC	1	0.0151515	0.0169274	0.018203	0.0177826	0.0176376	0.000375301
Gly-GCC	146019	189653	128846		His-GUG	1299	1354	1006		His-GUG	2	0.030303	0.00123269	0.00102019	0.00109824	0.00111704	6.20573e-05
Gly-UCC	17838	24159	16289		Ile2-CAU	24	27	32		Ile2-CAU	1	0.0151515	2.27748e-05	2.03436e-05	3.49342e-05	2.60175e-05	4.51323e-06
His-GUG	1299	1354	1006		Ile-GAU	42901	53516	39306		Ile-GAU	5	0.0757576	0.0407109	0.0403225	0.0429101	0.0413145	0.000805639
Ile2-CAU	24	27	32		Leu-CAA	18556	29686	18342		Leu-CAA	1	0.0151515	0.0176087	0.0223674	0.0200238	0.02	0.00137376
Ile-GAU	42901	53516	39306		Leu-CAG	54850	79496	47121		Leu-CAG	2	0.030303	0.0520499	0.0598975	0.0514416	0.054463	0.00272291
Leu-CAA	18556	29686	18342		Leu-GAG	2552	2824	2067		Leu-GAG	1	0.0151515	0.00242172	0.00212779	0.00225653	0.00226868	8.50682e-05
Leu-CAG	54850	79496	47121		Leu-UAA	1614	1768	1349		Leu-UAA	1	0.0151515	0.0015316	0.00133213	0.00147269	0.00144547	5.91705e-05
Leu-GAG	2552	2824	2067		Leu-UAG	7646	8401	7390		Leu-UAG	1	0.0151515	0.00725567	0.00632986	0.00806761	0.00721771	0.000502002
Leu-UAA	1614	1768	1349		Lys-UUU	85466	114327	76740		Lys-UUU	2	0.030303	0.0811029	0.0861414	0.0837765	0.0836736	0.00145541
Leu-UAG	7646	8401	7390		Met-CAU	4292	3893	3888		Met-CAU	1	0.0151515	0.00407289	0.00293324	0.0042445	0.00375021	0.000411478
Lys-UUU	85466	114327	76740		Phe-GAA	79	59	73		Phe-GAA	1	0.0151515	7.4967e-05	4.44545e-05	7.96935e-05	6.63717e-05	1.10432e-05
Met-CAU	4292	3893	3888		Pro-GGG	4782	8196	4266		Pro-GGG	1	0.0151515	0.00453788	0.0061754	0.00465716	0.00512348	0.000527087
Phe-GAA	79	59	73		Pro-UGG	2712	2071	2771		Pro-UGG	2	0.030303	0.00257355	0.00156043	0.00302508	0.00238635	0.000433045
Pro-GGG	4782	8196	4266		Ser-CGA	3	0	1		Ser-CGA	0	0	2.84685e-06	0	1.09169e-06	1.31285e-06	8.2922e-07
Pro-UGG	2712	2071	2771		Ser-GCU	12669	16857	13339		Ser-GCU	1	0.0151515	0.0120222	0.0127012	0.0145621	0.0130952	0.000759194
Ser-CGA	3	0	1		Ser-GGA	7475	7147	7008		Ser-GGA	1	0.0151515	0.0070934	0.00538502	0.00765058	0.00670966	0.000681575
Ser-GCU	12669	16857	13339		Ser-UGA	10444	14873	11150		Ser-UGA	2	0.030303	0.00991083	0.0112063	0.0121724	0.0110965	0.000655155
Ser-GGA	7475	7147	7008		Thr-CGU	495	558	363		Thr-CGU	1	0.0151515	0.00046973	0.000420434	0.000396284	0.000428816	2.16122e-05
Ser-UGA	10444	14873	11150		Thr-GGU	3239	2006	2806		Thr-GGU	1	0.0151515	0.00307365	0.00151145	0.00306329	0.00254946	0.000519014
Thr-CGU	495	558	363		Thr-UGU	19531	15239	15144		Thr-UGU	1	0.0151515	0.0185339	0.0114821	0.0165326	0.0155162	0.00209818
Thr-GGU	3239	2006	2806		Trp-CCA	43815	61455	35078		Trp-CCA	1	0.0151515	0.0415782	0.0463042	0.0382944	0.0420589	0.0023247
Thr-UGU	19531	15239	15144		Tyr-GUA	13112	17263	12891		Tyr-GUA	1	0.0151515	0.0124426	0.0130071	0.014073	0.0131742	0.000478014
Trp-CCA	43815	61455	35078		Val-GAC	28128	45355	23965		Val-GAC	1	0.0151515	0.026692	0.0341734	0.0261624	0.0290093	0.00258659
Tyr-GUA	13112	17263	12891		Val-UAC	67900	79396	58758		Val-UAC	3	0.0454545	0.0644337	0.0598221	0.0641457	0.0628005	0.00149149
Val-GAC	28128	45355	23965			1053797	1327201	916009			66	1	1	1	1	1
Val-UAC	67900	79396	58758
unused	115603	141677	129359
sum used	1053797	1468878	916009
sum total	1169400	1468878	1045368
prop used	0.901143	1	0.876255

## Sheet: M4-L
In Geneious v 11.1.4: Extract seqeunces 80-151 bp long, align to reference SBW25 (42 unique primary sequences) with no iterations, 10% gaps, 10% mismatch and matching equal reads to neither
M4-L: Evolved serCGA deletion mutant (derived from delserCGA-2)
	Raw reads					Raw reads						Proportions
Primary tRNA	rep1(sample8)	rep2(sample17)	rep3(sample26)		Isotype	rep1(sample8)	rep2(sample17)	rep3(sample26)		Isotype	Gene copy number	Gene set	rep1(sample8)	rep2(sample17)	rep3(sample26)	Mean	SE
Ala-GGC	82502	65135	84010		Ala-GGC	82502	65135	84010		Ala-GGC	2	0.0285714	0.0659047	0.061513	0.0752082	0.0675419	0.00403732
Ala-UGC	129357	135452	135317		Ala-UGC	129357	135452	135317		Ala-UGC	5	0.0714286	0.103334	0.12792	0.12114	0.117464	0.00733145
Arg-ACG	108744	69860	66520		Arg-ACG	108744	69860	66520		Arg-ACG	2	0.0285714	0.0868675	0.0659752	0.0595506	0.0707978	0.00824612
Arg-CCG	9524	5172	6203		Arg-CCG	9524	5172	6203		Arg-CCG	1	0.0142857	0.00760801	0.0048844	0.0055531	0.00601517	0.000819482
Arg-CCU	1579	751	983		Arg-CCU	1579	751	983		Arg-CCU	1	0.0142857	0.00126135	0.000709239	0.00088001	0.000950198	0.000163197
Arg-UCU	1949	2284	1947		Arg-UCU	1949	2284	1947		Arg-UCU	2	0.0285714	0.00155691	0.00215699	0.00174301	0.00181897	0.000177343
Asn-GUU1	20960	20094	19069		Asn-GUU	26436	25228	23782		Asn-GUU	2	0.0285714	0.0211177	0.0238251	0.0212903	0.0220777	0.000875116
Asn-GUU2	5476	5134	4713		Asp-GUC	120734	106336	96477		Asp-GUC	4	0.0571429	0.0964454	0.100423	0.086369	0.0944124	0.00418242
Asp-GUC	120734	106336	96477		Cys-GCA	17473	16408	20012		Cys-GCA	1	0.0142857	0.0139579	0.0154956	0.0179153	0.0157896	0.00115183
Cys-GCA-1	17473	16408	20012		fMet-CAU	16862	3467	5707		fMet-CAU	3	0.0428571	0.0134698	0.00327421	0.00510907	0.00728436	0.00313775
fMet-CAU-1	2478	483	867		Gln-UUG	2497	2404	1552		Gln-UUG	1	0.0142857	0.00199467	0.00227032	0.00138939	0.00188479	0.000260167
fMet-CAU-2	14384	2984	4840		Glu-UUC	176	262	151		Glu-UUC	4	0.0571429	0.000140593	0.000247431	0.00013518	0.000174401	3.65482e-05
Gln-UUG	2497	2404	1552		Gly-CCC	9051	4949	7619		Gly-CCC	1	0.0142857	0.00723017	0.0046738	0.00682075	0.00624157	0.000792747
Glu-UUC	176	262	151		Gly-GCC	167510	175134	166940		Gly-GCC	3	0.0428571	0.133811	0.165395	0.149449	0.149552	0.00911765
Gly-CCC	9051	4949	7619		Gly-UCC	22325	17207	19844		Gly-UCC	1	0.0142857	0.0178338	0.0162502	0.0177649	0.017283	0.000516779
Gly-GCC	167510	175134	166940		His-GUG	2006	692	882		His-GUG	4	0.0571429	0.00160244	0.000653519	0.000789592	0.00101518	0.000296245
Gly-UCC	22325	17207	19844		Ile2-CAU	66	19	32		Ile2-CAU	1	0.0142857	5.27225e-05	1.79435e-05	2.86473e-05	3.31044e-05	1.02842e-05
His-GUG	2006	692	882		Ile-GAU	61247	49136	54222		Ile-GAU	5	0.0714286	0.0489257	0.0464037	0.0485411	0.0479568	0.000784467
Ile2-CAU	66	19	32		Leu-CAA	21647	20223	27725		Leu-CAA	1	0.0142857	0.0172922	0.0190984	0.0248202	0.0204036	0.00226903
Ile-GAU	61247	49136	54222		Leu-CAG	62765	49870	56009		Leu-CAG	2	0.0285714	0.0501383	0.0470968	0.0501409	0.0491253	0.00101424
Leu-CAA	21647	20223	27725		Leu-GAG	3201	1187	1905		Leu-GAG	1	0.0142857	0.00255704	0.00112099	0.00170541	0.00179448	0.000416936
Leu-CAG	62765	49870	56009		Leu-UAA	1995	1135	1557		Leu-UAA	1	0.0142857	0.00159366	0.00107189	0.00139387	0.00135314	0.000151993
Leu-GAG	3201	1187	1905		Leu-UAG	10541	6258	7595		Leu-UAG	2	0.0285714	0.00842042	0.00591001	0.00679926	0.00704323	0.000734888
Leu-UAA	1995	1135	1557		Lys-UUU	98779	91308	103954		Lys-UUU	2	0.0285714	0.0789072	0.0862306	0.0930626	0.0860668	0.00408714
Leu-UAG	10541	6258	7595		Met-CAU	6834	2645	3731		Met-CAU	1	0.0142857	0.00545917	0.00249792	0.0033401	0.00376573	0.000880933
Lys-UUU	98779	91308	103954		Phe-GAA	169	45	61		Phe-GAA	1	0.0142857	0.000135001	4.24977e-05	5.4609e-05	7.73694e-05	2.90274e-05
Met-CAU	6834	2645	3731		Pro-GGG	5597	6835	7005		Pro-GGG	1	0.0142857	0.00447103	0.00645492	0.00627108	0.00573234	0.000632887
Phe-GAA	169	45	61		Pro-UGG	3589	3281	3278		Pro-UGG	2	0.0285714	0.00286698	0.00309855	0.00293456	0.0029667	6.87519e-05
Pro-GGG	5597	6835	7005		Ser-CGA	0	1	0		Ser-CGA	0	0	0	9.44392e-07	0	3.14797e-07	3.14797e-07
Pro-UGG	3589	3281	3278		Ser-GCU	15041	13599	12385		Ser-GCU	1	0.0142857	0.0120151	0.0128428	0.0110874	0.0119818	0.00050701
Ser-CGA	0	1	0		Ser-GGA	9907	5867	6697		Ser-GGA	1	0.0142857	0.00791396	0.00554075	0.00599535	0.00648335	0.000727243
Ser-GCU	15041	13599	12385		Ser-UGA	11339	9079	13073		Ser-UGA	2	0.0285714	0.00905788	0.00857414	0.0117033	0.00977845	0.000972517
Ser-GGA	9907	5867	6697		Thr-CGU	404	311	440		Thr-CGU	1	0.0142857	0.000322725	0.000293706	0.000393901	0.000336777	2.97648e-05
Ser-UGA	11339	9079	13073		Thr-GGU	5240	1089	1734		Thr-GGU	1	0.0142857	0.00418585	0.00102844	0.00155233	0.00225554	0.00097693
Thr-CGU	404	311	440		Thr-UGU	26607	8461	11164		Thr-UGU	1	0.0142857	0.0212543	0.0079905	0.00999433	0.0130797	0.00412804
Thr-GGU	5240	1089	1734		Trp-CCA	52828	55452	49130		Trp-CCA	1	0.0142857	0.0422003	0.0523684	0.0439826	0.0461838	0.00313483
Thr-UGU	26607	8461	11164		Tyr-GUA	17401	9858	16575		Tyr-GUA	1	0.0142857	0.0139004	0.00930982	0.0148384	0.0126829	0.00170812
Trp-CCA	52828	55452	49130		Val-GAC	35861	38761	38274		Val-GAC	1	0.0142857	0.0286467	0.0366056	0.034264	0.0331721	0.00236151
Tyr-GUA	17401	9858	16575		Val-UAC	82055	53721	62541		Val-UAC	3	0.0428571	0.0655476	0.0507337	0.0559885	0.0574233	0.00433617
Val-GAC	35861	38761	38274			1251838	1058882	1117033			70	1	1	1	1	1
Val-UAC	82055	53721	62541
unused	138944	120854	134369
sum used	1390782	1058882	1251402
sum total	1390782	1179736	1251402
prop used	1	0.897558	1

[truncated: 1 more sheets: unused_read_summary]
